# Supplementary material for: Pan-Cancer Molecular Classes Transcending Tumor Lineage Across 32 Cancer Types, Multiple Data Platforms, and over 10,000 Cases
Source: Oxford University Press journal article supplement (doi:10.1158/1078-0432.ccr-17-3378), 2018-02-09
Supplement: 10780432ccr173378-sup-192275_2_supp_4535392_p3bxd4.xlsx [file 10780432ccr173378-sup-192275_2_supp_4535392_p3bxd4.xlsx]

## Sheet: data platform summary
Supplementary Data 1, related to Figure 1
			Cases examined
Data Type	Platforms	Public Source	all cancers	ACC	BLCA	BRCA	CESC	CHOL	CRC	DLBC	ESCA	GBM	HNSC	KICH	KIRC	KIRP	LAML	LGG	LIHC	LUAD	LUSC	MESO	OV	PAAD	PCPG	PRAD	SARC	SKCM	STAD	TGCT	THCA	THYM	UCEC	UCS	UVM
Whole exome DNA sequence	Illumina	Unified Ensemble "MC3" Call Set from DNA Nexus (https://www.synapse.org/#!Synapse:syn7214402)	10224	92	411	1020	289	36	556	37	184	393	507	66	369	281	141	512	363	567	485	82	412	177	179	497	236	466	439	145	492	123	530	57	80
DNA methylation	Illumina (450K+27K arrays)	Broad Firehose Datasets (gdac.broadinstitute.org)	10959	80	412	1081	307	36	622	48	184	420	528	66	535	291	194	516	377	578	503	87	594	184	179	498	261	470	443	150	507	124	547	57	80
DNA copy number alteration	Affymetrix SNP 6	Broad Firehose GISTIC Analysis Results (gdac.broadinstitute.org)	10845	90	408	1080	295	36	616	48	184	577	522	66	528	288	191	513	370	516	501	87	579	184	162	492	257	367	441	150	499	123	539	56	80
mRNA expression	Illumina	Broad Firehose Datasets (gdac.broadinstitute.org)	10224	79	408	1095	304	36	623	48	184	161	520	66	533	290	173	516	371	515	501	87	262	178	179	497	259	469	415	150	503	120	545	57	80
microRNA expression	Illumina	Broad Firehose Datasets (gdac.broadinstitute.org)	10128	80	409	1078	307	36	549	47	184	0	523	66	516	291	188	512	372	513	478	76	453	178	179	494	259	448	442	150	502	124	538	56	80
Protein expression	RPPA	TCPA Portal (http://tcpaportal.org/tcpa/), Level 4	7663	46	344	874	171	30	456	33	126	205	346	63	445	208	0	427	184	362	325	61	411	105	80	351	221	353	392	118	372	90	404	48	12
A total of 11219 cases were analyzed in the present study. Cancer type abbreviations are as follows: LAML, Acute Myeloid Leukemia; ACC, Adrenocortical carcinoma; BLCA, Bladder Urothelial Carcinoma; LGG, Brain Lower Grade Glioma; BRCA, Breast invasive carcinoma; CESC, Cervical squamous cell carcinoma and endocervical adenocarcinoma; CHOL, Cholangiocarcinoma; CRC, Colorectal adenocarcinoma (combini…
