# Supplementary material for: Pan-Cancer Molecular Classes Transcending Tumor Lineage Across 32 Cancer Types, Multiple Data Platforms, and over 10,000 Cases
Source: Oxford University Press journal article supplement (doi:10.1158/1078-0432.ccr-17-3378), 2018-02-09
Supplement: 10780432ccr173378-sup-192275_2_supp_4535394_p3bxd5.xlsx [file 10780432ccr173378-sup-192275_2_supp_4535394_p3bxd5.xlsx]

## Sheet: expression features by patient
Supplementary Data 4
			selected genes	selected genes	selected genes	selected genes	selected genes	selected genes	selected genes	pathway signatures	pathway signatures	pathway signatures	pathway signatures	pathway signatures	pathway signatures	pathway signatures	pathway signatures	pathway signatures	pathway signatures	pathway signatures	pathway signatures	pathway signatures	pathway signatures	pathway signatures	pathway signatures	pathway signatures	pathway signatures	pathway signatures	pathway signatures	pathway signatures	pathway signatures	pathway signatures	pathway signatures	pathway signatures	pathway signatures	pathway signatures	pathway signatures	pathway signatures	pathway signatures	pathway signatures	pathway signatures	pathway signatures	immune	immune	immune	immune	immune	immune	immune
			norm within type	norm within type	norm within type	norm within type	norm within type	norm within type	norm within type	across cancers	across cancers	across cancers	across cancers	across cancers	across cancers	across cancers	across cancers	across cancers	across cancers	across cancers	across cancers	across cancers	across cancers	across cancers	across cancers	across cancers	across cancers	norm within type	norm within type	norm within type	norm within type	norm within type	norm within type	norm within type	norm within type	norm within type	norm within type	norm within type	norm within type	norm within type	norm within type	norm within type	norm within type	norm within type	norm within type	norm within type	norm within type	norm within type	norm within type
		profile id	molecular features	molecular features	molecular features	molecular features	molecular features	molecular features	molecular features	molecular features	molecular features	molecular features	molecular features	molecular features	molecular features	molecular features	molecular features	molecular features	molecular features	molecular features	molecular features	molecular features	molecular features	molecular features	molecular features	molecular features	molecular features	molecular features	molecular features	molecular features	molecular features	molecular features	molecular features	molecular features	molecular features	molecular features	molecular features	molecular features	molecular features	molecular features	molecular features	molecular features	molecular features	molecular features	molecular features	molecular features	molecular features	molecular features	molecular features
		profile id	gene-level (within tumor type norm.)	gene-level (within tumor type norm.)	gene-level (within tumor type norm.)	gene-level (within tumor type norm.)	gene-level (within tumor type norm.)	gene-level (within tumor type norm.)	gene-level (within tumor type norm.)	gene signatures	gene signatures	gene signatures	EMT signature	Hypoxia signature	p53 signature	Notch signature	Cell cycle signature	Wnt signature	Myc signature	Ras signature	Nrf2 signature	metabolic signature	metabolic signature	metabolic signature	metabolic signature	metabolic signature	Yap1 signature	EMT signature	Hypoxia signature	p53 signature	Notch signature	Cell cycle signature	Wnt signature	MYC signature	Ras signature	Nrf2 signature	metabolic signature	metabolic signature	metabolic signature	metabolic signature	metabolic signature	Yap1 signature	gene-level (within tumor type norm.)	gene-level (within tumor type norm.)	gene-level (within tumor type norm.)	gene-level (within tumor type norm.)	gene-level (within tumor type norm.)	gene-level (within tumor type norm.)	gene-level (within tumor type norm.)
			RNA-seq (RPKM, within tumor type norm.)	RNA-seq (RPKM, within tumor type norm.)	RNA-seq (RPKM, within tumor type norm.)	RNA-seq (RPKM, within tumor type norm.)	RNA-seq (RPKM, within tumor type norm.)	RNA-seq (RPKM, within tumor type norm.)	RNA-seq (RPKM, within tumor type norm.)	RPPA-based (across cancers)	RPPA-based (across cancers)	RPPA-based (across cancers)	RNA-seq (norm. across cancers)	RNA-seq (norm. across cancers)	RNA-seq (norm. across cancers)	RNA-seq (norm. across cancers)	RNA-seq (norm. across cancers)	RNA-seq (norm. across cancers)	RNA-seq (norm. across cancers)	RNA-seq (norm. across cancers)	RNA-seq (norm. across cancers)	RNA-seq (norm. across cancers)	RNA-seq (norm. across cancers)	RNA-seq (norm. across cancers)	RNA-seq (norm. across cancers)	RNA-seq (norm. across cancers)	RNA-seq (norm. across cancers)	RNA-seq (within tumor type norm.)	RNA-seq (within tumor type norm.)	RNA-seq (within tumor type norm.)	RNA-seq (within tumor type norm.)	RNA-seq (within tumor type norm.)	RNA-seq (within tumor type norm.)	RNA-seq (within tumor type norm.)	RNA-seq (within tumor type norm.)	RNA-seq (norm. across cancers)	RNA-seq (norm. across cancers)	RNA-seq (norm. across cancers)	RNA-seq (norm. across cancers)	RNA-seq (norm. across cancers)	RNA-seq (norm. across cancers)	RNA-seq (norm. across cancers)	RNA-seq (RPKM, within tumor type norm.)	RNA-seq (RPKM, within tumor type norm.)	RNA-seq (RPKM, within tumor type norm.)	RNA-seq (RPKM, within tumor type norm.)	RNA-seq (RPKM, within tumor type norm.)	RNA-seq (RPKM, within tumor type norm.)	RNA-seq (RPKM, within tumor type norm.)
cancer type	id	RNA-seq profile id	TP53|7157	MYC|4609	MKI67|4288	HIF1A|3091	CD274|29126	VIM|7431	ZEB1|6935	PI3K	mTOR	MAPK	EMT signature	Hypoxia signature	p53 signature	Notch signature	Cell cycle signature	Wnt signature	Myc signature	Ras signature	Nrf2 signature	KEGG_GLYCOLYSIS_GLUCONEOGENESIS	KEGG_FATTY_ACID_METABOLISM	KEGG_CITRATE_CYCLE_TCA_CYCLE	KEGG_PENTOSE_PHOSPHATE_PATHWAY	KEGG_OXIDATIVE_PHOSPHORYLATION	Yap1 signature	EMT signature	Hypoxia signature	p53 signature	Notch signature	Cell cycle signature	Wnt signature	MYC signature	Ras signature	Nrf2 signature	KEGG_GLYCOLYSIS_GLUCONEOGENESIS	KEGG_FATTY_ACID_METABOLISM	KEGG_CITRATE_CYCLE_TCA_CYCLE	KEGG_PENTOSE_PHOSPHATE_PATHWAY	KEGG_OXIDATIVE_PHOSPHORYLATION	Yap1 signature	CTAG1B	MAGEA4	SAGE1	CD274	PDCD1	CD247	PDCD1LG2
ACC	TCGA-OR-A5J1	TCGA-OR-A5J1-01A-11R-A29S-07	-0.669653	-0.0896995	-1.01439	-0.23739	-0.828679	-0.837914	-0.966371	NA	NA	NA	-0.201424	-0.495509	0.0884536	-0.248394	-0.343825	-0.892844	0.203677	-1.55956	-1.33833	-0.668645	0.600151	0.133515	-1.30455	1.40824	0.0285454	0.0013416	-0.278643	0.323412	0.230791	-0.0728853	0.538513	-0.18578	3.57082e-05	-0.606607	-0.91428	-0.326869	-0.895833	-1.28646	0.0706308	0.292949	3.19343	0.567753	2.06541	-0.828679	0.157315	0.128655	-0.96964
ACC	TCGA-OR-A5J2	TCGA-OR-A5J2-01A-11R-A29S-07	-3.18353	0.700446	0.620985	0.0390572	-0.0847743	1.36586	2.21442	-0.897673	-1.31148	-0.542736	0.534897	-0.348247	-0.815473	0.00300934	-0.141963	-0.108436	-0.360776	-2.00826	-0.0819403	-0.732529	0.716222	0.827665	-1.65556	0.146902	-0.144781	0.344008	-0.0712896	-0.667865	0.608315	0.160688	1.81802	-0.951022	-1.26096	0.864642	-1.1816	0.106302	-0.323029	-1.78543	-1.50894	0.0532963	1.07424	0	0	-0.0847743	1.15752	0.301568	0.222114
ACC	TCGA-OR-A5J3	TCGA-OR-A5J3-01A-11R-A29S-07	0.418268	-0.24906	-0.425542	1.46561	-0.392741	-0.555575	-1.07812	1.60152	0.923819	-0.0799175	0.0526843	0.015675	-0.18727	-0.477848	-0.343754	-0.642552	0.6211	-1.46641	-0.278269	1.9123	0.927424	1.50373	3.12116	1.09447	-0.321606	0.23247	0.290719	0.0318344	-0.126835	-0.10405	1.12873	0.376174	0.168377	0.607814	2.12032	0.187737	0.403683	3.17773	-0.352079	-0.318381	0.520925	0	0	-0.392741	-0.200232	-0.775797	-0.710499
ACC	TCGA-OR-A5J4	NA	NA	NA	NA	NA	NA	NA	NA	NA	NA	NA	NA	NA	NA	NA	NA	NA	NA	NA	NA	NA	NA	NA	NA	NA	NA	NA	NA	NA	NA	NA	NA	NA	NA	NA	NA	NA	NA	NA	NA	NA	NA	NA	NA	NA	NA	NA	NA
ACC	TCGA-OR-A5J5	TCGA-OR-A5J5-01A-11R-A29S-07	0.832517	-0.107706	1.28026	0.253192	-0.496398	0.0378408	0.689053	NA	NA	NA	0.687143	-0.458131	-1.0676	0.183413	-0.0884796	0.228467	-0.18808	-1.74835	-0.626702	-0.557338	-0.0672686	-1.0975	-1.88473	1.63639	-0.937867	0.433941	-0.23948	-0.941265	0.828532	0.192721	2.34132	-0.701644	-0.417457	0.147696	-0.690918	-1.24295	-2.3125	-2.30638	0.359853	-1.1752	0	0	0.501673	-0.496398	0.473217	0.102499	-0.300058
ACC	TCGA-OR-A5J6	TCGA-OR-A5J6-01A-31R-A29S-07	-0.94668	0.175321	-2.00921	-1.1054	-0.914493	0.851656	-2.0185	-0.324505	-0.102745	0.281293	-0.893456	-0.33153	-0.345926	-0.896299	-0.671392	-2.52014	0.229589	-0.831594	-0.93774	0.581012	1.88753	2.6013	-0.495226	1.97783	-0.433914	-0.445462	-0.104727	-0.18893	-0.522405	-0.468823	-1.26231	-0.0845137	1.40135	-0.307468	0.313808	1.6285	1.84123	-0.56507	0.69133	-0.446507	0	0	0	-0.914493	0	0.590829	0.928913
ACC	TCGA-OR-A5J7	TCGA-OR-A5J7-01A-11R-A29S-07	-0.203546	0.607506	1.69933	-0.275331	-0.0264877	-1.88853	-0.440621	0.340177	-0.147115	-0.164717	-0.504113	-0.468488	-0.222637	0.0343833	0.0656692	-1.54594	0.621307	-1.66572	-0.88238	-0.242029	0.840995	1.27513	0.61084	1.50034	0.703571	-0.226714	-0.236941	-0.0023819	0.636409	0.365074	-0.264824	0.54602	-0.724483	-0.221525	-0.46467	0.0884795	0.25382	0.632788	0.143264	1.14203	0.377571	0	0	-0.0264877	-0.689833	-0.765433	-1.59415
ACC	TCGA-OR-A5J8	TCGA-OR-A5J8-01A-11R-A29S-07	-0.112119	2.67887	0.850443	-1.18942	1.32711	0.828865	2.81921	0.610694	0.887606	2.40939	2.44893	0.431255	0.0595935	0.223775	-0.0892647	-0.495725	-1.39458	-1.70504	0.361179	-0.195909	-0.320277	-0.840799	-0.160309	0.199979	-0.966442	1.59476	0.851428	0.37561	0.993809	0.201247	1.52758	-1.58155	-0.38378	1.74438	-0.15604	-1.5141	-2.22614	-0.335793	-1.32223	-0.62359	0.388149	0	0	1.32711	2.39846	1.86907	2.69001
ACC	TCGA-OR-A5J9	TCGA-OR-A5J9-01A-11R-A29S-07	0.737484	1.11067	-0.600752	0.030258	-1.19074	0.84893	0.494871	-0.211806	-0.829984	-0.347757	0.509796	-0.460423	-0.519433	0.447366	-0.289425	-0.191724	0.0691856	-1.97047	-0.986506	-1.24952	0.766938	0.148338	-1.12331	1.1431	0.137698	0.310839	-0.1946	-0.337265	1.215	-0.0267093	1.70721	-0.497699	-1.63883	-0.247004	-1.65545	-0.130993	-1.05633	-1.35392	-0.306156	0.357678	0	0	0	-1.19074	-0.197937	0.228146	-1.151
ACC	TCGA-OR-A5JA	TCGA-OR-A5JA-01A-11R-A29S-07	0.590143	-0.335338	1.01981	-0.113287	-0.0767477	-0.217008	-1.39748	0.885609	0.123373	0.137524	0.134481	0.208957	-0.302201	-0.393657	0.0960261	-1.10373	0.428074	-1.45869	-0.287304	1.56704	0.627458	1.08482	1.38145	1.4638	0.447109	0.200743	0.542005	-0.0328704	-0.0490501	0.396054	0.382882	0.0425858	0.311649	0.654243	1.9626	-0.470398	-0.026345	0.977038	0.12556	0.854712	0.475004	1.04404	2.41398	-0.0767477	0.408943	-0.304348	0.0288505
ACC	TCGA-OR-A5JB	TCGA-OR-A5JB-01A-11R-A29S-07	0.296689	2.63707	1.67544	0.441976	2.48665	0.416752	0.966114	NA	NA	NA	0.529852	0.379747	0.323918	0.110198	0.147185	-1.49393	1.29177	-0.868771	-1.30845	-0.0301681	-0.609515	-0.287021	1.34047	0.710546	0.268064	0.454907	0.764154	0.763082	0.897269	0.472778	-0.0792802	0.671479	1.08581	-0.422578	-0.108298	-2.40118	-1.42456	1.33024	-0.703934	0.376861	0	0	0	2.48665	2.36255	2.47138	2.41904
ACC	TCGA-OR-A5JC	TCGA-OR-A5JC-01A-11R-A29S-07	0.53618	0.343899	0.407896	-0.593465	0.369661	0.14544	0	NA	NA	NA	0.164521	-0.138552	-0.0394868	-0.120036	-0.121497	-0.786479	0.534531	-1.51655	-0.431688	0.594252	1.02228	0.774413	0.35547	2.08978	-0.190628	0.112037	0.141054	0.233129	0.384514	0.161469	0.730146	0.46315	0.124529	0.306863	0.629519	0.470867	-0.331835	0.362874	0.828275	-0.0731095	0.918905	0.712599	0	0.369661	-0.160741	0.503069	0.345314
ACC	TCGA-OR-A5JD	TCGA-OR-A5JD-01A-11R-A29S-07	0.143642	0.185121	-1.03168	-0.937593	0.850535	-0.485431	0.110278	NA	NA	NA	-0.178559	-0.188471	-0.000100654	-0.571405	-0.414815	-1.35493	0.684421	-1.50262	0.0127594	1.84031	2.19154	3.18556	0.557791	3.21453	-0.905256	-0.0374099	0.00328776	0.275513	-0.162356	-0.178788	0.118731	0.358159	0.441896	0.927908	2.02469	2.59372	2.39586	0.914616	2.15921	-1.04476	0	0	0.414794	0.850535	1.18534	1.27072	-0.0238375
ACC	TCGA-OR-A5JE	TCGA-OR-A5JE-01A-11R-A29S-07	-0.671908	1.19838	0.575916	-0.427568	-0.309289	0.0372698	-1.41726	NA	NA	NA	0.361092	-0.174292	0.188738	-0.240227	-0.192018	-1.65474	0.723015	-1.54183	-1.55905	0.823393	1.04922	2.272	0.128259	2.54956	-0.122029	0.192754	0.0672249	0.444907	0.273962	0.0383741	-0.458153	0.627827	-0.154172	-1.06142	0.497993	0.21271	1.29586	-0.106404	1.44159	0.0643173	0	0	4.24558	-0.309289	0.654464	-0.448854	-0.519774
ACC	TCGA-OR-A5JF	TCGA-OR-A5JF-01A-11R-A29S-07	0.412791	1.03631	-1.23457	-0.0282215	0.690913	0.310059	-0.504214	NA	NA	NA	0.302328	-0.406607	0.0646028	-0.351809	-0.343335	-0.903967	0.366589	-1.51021	-0.225955	0.0968172	1.17063	0.843619	0.351628	1.26826	-0.366271	0.187713	-0.161947	0.283358	0.0993308	-0.110532	0.692666	-0.0274378	-0.136068	0.578718	-0.12039	0.651857	-0.262881	0.137966	-0.224381	-0.474618	0	0	0.816893	0.690913	-0.548751	-0.791032	-0.302218
ACC	TCGA-OR-A5JG	TCGA-OR-A5JG-01A-11R-A29S-07	-0.852734	1.11149	0.56329	1.78823	-0.60018	0.641289	-1.44686	NA	NA	NA	0.743995	-0.332829	-0.890571	-0.472661	-0.109668	-1.87704	1.15901	-1.6023	-0.966339	-0.275422	0.687482	1.89939	0.119947	2.05424	0.309104	0.521334	-0.105596	-0.769409	-0.0705261	0.150996	-0.728015	1.129	-0.425339	-0.291629	-0.485384	-0.199437	0.929369	-0.0494997	0.750736	0.649487	0	0	0	-0.60018	-0.253115	-0.486155	-0.173991
ACC	TCGA-OR-A5JH	NA	NA	NA	NA	NA	NA	NA	NA	NA	NA	NA	NA	NA	NA	NA	NA	NA	NA	NA	NA	NA	NA	NA	NA	NA	NA	NA	NA	NA	NA	NA	NA	NA	NA	NA	NA	NA	NA	NA	NA	NA	NA	NA	NA	NA	NA	NA	NA
ACC	TCGA-OR-A5JI	TCGA-OR-A5JI-01A-11R-A29S-07	-0.626359	-0.71227	-1.13728	-0.23413	-0.577007	0.903931	0.974465	NA	NA	NA	0.873208	-0.160822	-0.330227	-0.18518	-0.446102	-0.617635	-0.541766	-1.4779	-0.236517	0.499297	1.10306	0.0146042	0.424857	1.52634	-0.97647	0.563976	0.0936664	-0.18336	0.318557	-0.207794	1.00596	-1.40679	0.296088	0.614938	0.421106	0.860218	-1.15219	0.260543	0.181911	-1.11109	0	0	0	-0.577007	1.54879	1.54926	0.917477
ACC	TCGA-OR-A5JJ	TCGA-OR-A5JJ-01A-11R-A29S-07	1.39067	1.25231	0.793305	0	-0.137431	0.31848	-1.08255	NA	NA	NA	0.633625	-0.069307	-0.407731	-0.191582	-0.00418898	-0.41954	0.558323	-1.69532	-0.300786	0.830638	0.89413	1.10723	1.15425	1.40749	-0.0284748	0.339915	0.180369	-0.303563	0.286661	0.276732	1.38429	0.395868	-0.458325	0.458266	0.685982	0.150342	-0.0827602	1.18171	0.0417683	0.201916	0	0	0	-0.137431	1.41099	0.725228	0.177448
ACC	TCGA-OR-A5JK	TCGA-OR-A5JK-01A-11R-A29S-07	0	0.414953	-0.0501503	-0.264244	1.61738	0.404342	0.150436	NA	NA	NA	0.392913	-0.245951	-0.197186	-0.394131	-0.277099	-0.811428	0.31821	-1.49702	-0.317825	0.577584	1.1583	0.999105	-1.06888	1.81161	-0.947701	0.241334	0.0157924	0.0435897	0.0294493	-0.0148523	0.873693	-0.0709948	0.308076	0.394483	0.820508	0.582738	0.102675	-1.1545	0.456754	-1.15787	1.56622	0	1.04115	1.61738	3.51483	2.30629	1.50391
ACC	TCGA-OR-A5JL	TCGA-OR-A5JL-01A-11R-A29S-07	-1.20758	-0.43161	-0.00406406	1.21469	0.3717	-2.20946	-0.521404	NA	NA	NA	-1.12762	-0.366473	-0.738412	-0.658544	-0.211182	-1.76353	0.846776	-1.22336	0.284953	1.55808	2.02842	3.2804	0.667726	2.41119	0.364575	-0.598185	-0.148479	-0.558161	-0.356459	0.0481481	-0.665627	0.858792	0.521642	1.22875	1.88207	2.10954	2.41679	0.832986	1.14936	0.659188	0	0	0	0.3717	-0.102414	0.469765	0.217425
ACC	TCGA-OR-A5JM	TCGA-OR-A5JM-01A-11R-A29S-07	-0.723969	-0.118252	1.53351	-0.284235	-0.0945508	0.0839227	-0.475818	NA	NA	NA	-0.311099	-0.260152	0.0807509	-0.811399	0.0656759	-1.21956	0.206556	-1.69007	-0.963593	0.242487	0.752687	0.626499	0.066412	0.495859	1.28177	-0.200857	-0.0612643	0.297769	-0.659805	0.382012	0.142757	-0.201489	-0.739161	-0.171919	0.0754301	-0.326928	-0.386163	-0.167547	-1.02843	1.78424	0	0	0	-0.0945508	-1.15057	-1.21891	-1.35238
ACC	TCGA-OR-A5JO	TCGA-OR-A5JO-01A-11R-A29S-07	0.430762	1.93699	-0.08157	-0.465765	1.17894	0.194434	0.661734	NA	NA	NA	0.237408	0.0271884	0.142577	-0.282582	-0.391947	-1.36178	-0.926051	-1.00641	0.131633	0.620256	1.40893	0.811669	-0.108681	0.791718	-1.06999	0.155127	0.319358	0.463482	0.261379	-0.15025	0.223335	-1.25905	1.19639	1.25741	0.591564	1.1056	-0.173786	-0.0635278	-0.667169	-0.887178	0	0	1.14423	1.17894	1.26935	2.73552	2.05449
ACC	TCGA-OR-A5JP	TCGA-OR-A5JP-01A-11R-A29S-07	-2.03158	0.431064	0.513505	1.14842	-0.614145	0.248819	-0.0527473	1.06946	-0.209049	-0.22752	1.08998	-0.0969765	-0.0343208	-0.1616	-0.155289	-0.843997	0.705485	-1.69427	-0.74718	0.448139	1.0337	2.32088	0.512954	1.58504	0.508306	0.672427	0.210073	0.171058	0.45333	0.0979802	0.793005	0.515174	-0.625742	0.0199622	0.071466	0.26137	1.31708	0.547882	0.337231	0.793315	0	0	0	-0.614145	-0.657481	-0.630443	-0.520923
ACC	TCGA-OR-A5JQ	TCGA-OR-A5JQ-01A-11R-A29S-07	0.258058	-0.133944	-0.349934	-0.0754878	0.180152	-0.208757	-0.369156	NA	NA	NA	0.705734	-0.194168	-0.088081	-0.368905	-0.246331	-0.319474	-0.593561	-1.5103	-0.0766219	0.224907	0.929119	0.569221	0.689703	0.887248	-0.46779	0.408735	0.0306927	0.120948	-0.0175794	0.0159685	1.31778	-1.56393	0.459635	0.841642	-0.0754925	0.434154	-0.617341	0.673671	-0.502754	-0.338453	0	0	0	0.180152	1.72748	1.70533	0.837623
ACC	TCGA-OR-A5JR	TCGA-OR-A5JR-01A-11R-A29S-07	-0.930502	-0.484236	-0.272124	0.330704	0.86995	-1.22754	0.364792	1.10336	-0.265614	-0.354189	-0.439833	-0.343426	-0.0634623	-0.597482	-0.246914	-1.57729	0.32816	-1.30083	-0.0684996	0.964809	1.3358	2.09691	1.54641	1.84183	-0.128956	-0.21116	-0.185142	0.115854	-0.268341	0.0187367	-0.305434	-0.120888	0.637984	0.747989	0.587891	0.904334	1.14746	1.51058	0.50826	0.0731155	0	0	0	0.86995	0.329545	0.999891	1.44933
ACC	TCGA-OR-A5JS	TCGA-OR-A5JS-01A-11R-A29S-07	0.656305	0.939587	0.920471	1.50789	-0.218592	-0.913701	-1.46949	-0.135747	-0.546727	-1.51524	-0.201795	-0.35268	0.0717793	-0.737101	-0.0968811	-1.17219	0.603868	-1.60297	-0.874565	0.393097	0.734135	1.04375	0.492431	0.783331	0.302103	-0.116321	-0.165077	0.294149	-0.410197	0.196931	0.0269558	0.449036	-0.744548	-0.198741	0.183788	0.00294784	-0.0689583	0.388508	-0.832916	0.653376	0	0	0	-0.218592	-0.0740928	-0.512908	-1.41007
ACC	TCGA-OR-A5JT	TCGA-OR-A5JT-01A-11R-A29S-07	-0.196438	-0.689369	-0.225624	-0.130838	0.624566	-0.251532	-0.543941	-0.0467224	-0.379323	0.648548	-0.00529032	-0.161344	-0.0794785	-0.806639	-0.28809	-1.69895	0.410531	-1.27687	-0.370234	1.097	1.5157	1.97716	1.12772	1.91747	-0.208156	0.177169	0.0567521	0.0943682	-0.492095	-0.0356755	-0.385585	0.0434956	0.53216	0.394465	0.908641	1.29913	1.01584	1.06182	0.581594	-0.0979796	0	0	0	0.624566	-0.62918	0.0516933	0.378287
ACC	TCGA-OR-A5JU	NA	NA	NA	NA	NA	NA	NA	NA	NA	NA	NA	NA	NA	NA	NA	NA	NA	NA	NA	NA	NA	NA	NA	NA	NA	NA	NA	NA	NA	NA	NA	NA	NA	NA	NA	NA	NA	NA	NA	NA	NA	NA	NA	NA	NA	NA	NA	NA
ACC	TCGA-OR-A5JV	TCGA-OR-A5JV-01A-11R-A29S-07	-0.380498	-0.755134	-0.217556	1.15025	1.84648	-1.77669	0.141358	-0.8518	-1.66179	-0.45895	0.028732	-0.0586589	-0.0177236	-0.438618	-0.283057	-2.05072	0.389987	-1.12778	-0.0605899	0.97392	1.41046	2.14018	0.12845	1.70895	-0.397267	0.123782	0.216416	0.179459	-0.00249611	-0.0302679	-1.03628	-0.146555	0.928157	0.823279	0.940906	1.01874	1.14485	0.138937	0.278643	-0.311343	0.468171	0	4.61282	1.84648	1.70271	0.83611	1.01227
ACC	TCGA-OR-A5JW	TCGA-OR-A5JW-01A-11R-A29S-07	-0.0495644	-0.120414	-0.613453	2.30419	0.807746	-0.501004	0.718152	0.796812	0.265683	0.597572	-0.536934	-0.320763	-0.264136	-0.301535	-0.294116	-1.45606	0.62199	-1.5046	-0.760602	0.141404	0.671514	0.995168	0.681863	0.670373	0.0435528	-0.267421	-0.102421	-0.0659436	0.143404	-0.0508575	-0.0995404	0.356981	-0.386893	-0.0822709	0.0600147	-0.22897	-0.225974	0.262191	-0.930474	0.265916	0	0	1.12827	0.807746	-0.357791	-0.970812	-0.382769
ACC	TCGA-OR-A5JX	TCGA-OR-A5JX-01A-11R-A29S-07	0.688053	-0.480812	-2.45753	1.21282	0.560014	-0.25817	0.832936	NA	NA	NA	0.574244	-0.205794	-0.410647	-0.417792	-0.529027	-1.12726	0.0296995	-1.51634	-1.10818	0.49605	0.1277	-0.292896	0.000306104	1.4779	-0.957184	0.329775	0.083276	-0.184087	0.0361384	-0.29393	0.404883	-0.561601	-0.127584	-0.390775	0.399741	-0.947906	-1.49869	-0.391515	0.181186	-1.15935	0	0	1.7607	0.560014	0.604836	0.691749	-0.531439
ACC	TCGA-OR-A5JY	TCGA-OR-A5JY-01A-31R-A29S-07	-2.17997	-0.190237	1.14981	0.892841	1.38476	-1.61278	-1.38439	-1.03544	-0.748721	-0.509452	-0.493554	-0.0336286	0.550773	-0.485633	0.0499078	-1.13107	0.113138	-1.23758	-0.0529178	0.747137	0.244194	2.15641	-0.29354	1.07898	0.547228	-0.294913	0.243586	0.85863	-0.104387	0.378136	0.459398	-0.356741	0.354698	0.933898	0.704896	-0.956095	1.04856	0.0935342	-0.405698	0.671677	0	0	0.744885	1.38476	0.573437	-0.486196	1.02575
ACC	TCGA-OR-A5JZ	TCGA-OR-A5JZ-01A-11R-A29S-07	-0.322643	-0.585874	0.173405	0.38682	0.352301	-0.232108	0.573221	0.752588	-0.98175	0.552691	-0.158001	0.0259199	0.178605	-0.732668	-0.208242	-1.9385	0.260204	-1.15463	-0.688758	1.48865	0.48797	0.999215	1.76476	0.538867	-0.124307	0.0807242	0.276841	0.445727	-0.385096	0.0597686	-0.732509	-0.165475	0.790602	0.0218442	1.57712	-0.480501	0.0982624	1.44466	-1.08221	0.0154051	0	0	0	0.352301	-0.484424	0.177268	0.426941
ACC	TCGA-OR-A5K0	TCGA-OR-A5K0-01A-11R-A29S-07	0.00088266	1.9725	0.576074	-1.14001	0.00249466	-3.95685	-1.3639	-0.085133	-0.8713	-0.461305	-0.413254	-0.496357	0.0248479	-1.38288	-0.296466	-1.52673	0.236902	-1.45189	-1.9439	-0.41997	-0.157548	0.964518	-0.775274	0.757855	-0.322077	-0.141068	-0.362144	0.187317	-1.30367	-0.0491943	-0.397256	0.0438389	-0.614512	-1.28994	-0.723695	-1.46866	-0.197842	-0.375299	-0.603863	-0.267259	0	6.79512	0.371099	0.00249466	-0.586353	-0.851667	-0.565455
ACC	TCGA-OR-A5K1	TCGA-OR-A5K1-01A-11R-A29S-07	0.295674	-0.258508	-0.0617233	-0.0737355	0	-0.90332	0.236722	2.03212	1.18673	0.626963	0.0254266	-0.182612	0.0141164	-0.254789	-0.263234	-1.97891	0.36392	-1.21543	-0.888113	0.112881	0.807241	2.09945	0.609907	1.93879	-0.397579	0.039787	0.0870158	0.244419	0.248317	-0.00988988	-0.746666	0.112701	0.824487	-0.257931	-0.320984	0.278063	1.02112	0.701706	0.661314	-0.310913	0	0	0	0	-0.174141	1.00081	0.214511
ACC	TCGA-OR-A5K2	TCGA-OR-A5K2-01A-11R-A29S-07	-0.0563415	0.811233	0.0222656	-0.139681	-1.88066	0.105167	-0.679619	NA	NA	NA	0.372844	-0.146729	0.0497356	-0.496879	-0.255125	-1.61671	0.829199	-1.60585	-1.30235	0.600916	0.966723	1.65847	0.841053	2.37816	-0.098936	0.206928	0.105976	0.256811	-0.0596986	-0.0189582	-0.448942	0.980469	-0.278028	-0.767852	0.355348	0.123932	0.666823	1.21339	1.16256	0.131953	0	0	0.54452	-1.88066	0.376722	-0.642193	-0.0348678
ACC	TCGA-OR-A5K3	TCGA-OR-A5K3-01A-11R-A29S-07	-0.508613	-1.61057	-0.145017	-0.289883	0.503147	-0.375924	-1.01616	-0.26169	-1.11387	-0.699215	-0.457734	-0.213867	-0.165405	-0.719163	-0.410752	-1.77451	0.79595	-1.18492	-1.09506	0.598539	0.831724	2.69625	0.353138	3.01503	-0.384396	-0.166927	-0.00355738	0.040862	-0.442801	-0.176561	-0.47988	0.846804	0.790801	-0.566115	0.28919	0.140544	1.75684	0.373546	1.97351	-0.393601	0	0	1.11727	0.503147	1.42385	-0.349615	0.503208
ACC	TCGA-OR-A5K4	TCGA-OR-A5K4-01A-11R-A29S-07	-0.205995	-0.43647	0.174092	0.350293	1.11492	-1.33632	0.208026	-0.558781	-1.20094	-1.11098	-0.580761	-0.492283	-0.650838	-0.750818	-0.107639	-1.69616	0.782202	-1.38215	-0.963552	0.985369	1.78896	1.61005	0.486992	1.3044	0.403598	-0.187417	-0.34932	-0.505458	-0.508877	0.163002	-0.524196	0.658071	0.084413	-0.360125	0.750154	1.58685	0.533998	0.458939	-0.143156	0.65821	1.49496	0	0	1.11492	-0.802576	-0.0092271	-0.628932
ACC	TCGA-OR-A5K5	TCGA-OR-A5K5-01A-11R-A29S-07	-0.612672	0.238147	-0.135927	-2.11564	-1.03057	0.5281	-2.01438	1.4997	-0.429955	-0.0511837	0.243583	-0.0890727	-0.00424171	-0.602668	-0.253912	-0.981163	0.223483	-1.51579	-1.19419	1.17787	0.772889	0.845153	0.377186	1.83149	-0.110572	0.143703	0.152245	0.169052	-0.180752	-0.0166241	0.391253	-0.137673	0.112455	-0.612872	1.04258	-0.213008	-0.25501	0.416675	0.515725	0.0222589	0	0	5.23573	-1.03057	-0.0251438	-1.18379	-0.176059
ACC	TCGA-OR-A5K6	TCGA-OR-A5K6-01A-11R-A29S-07	1.58616	0.991274	-0.181621	-0.32902	-0.644579	-0.67807	-0.150574	0.559547	-0.453375	-0.095142	-0.0474142	-0.372199	-0.332911	-0.803487	-0.380108	-1.475	0.707871	-1.34233	-0.845738	0.175366	0.732588	1.39109	-0.437985	1.33105	-0.172911	-0.00985979	-0.184164	-0.15371	-0.534543	-0.160254	-0.193931	0.491293	0.327086	-0.174089	-0.129825	-0.248605	0.21152	-0.576878	-0.161045	0.0186819	0	0	0.966472	-0.644579	-0.42933	-0.230821	-0.16116
ACC	TCGA-OR-A5K8	TCGA-OR-A5K8-01A-11R-A29S-07	0.424836	-1.33341	0.507195	-0.970024	0.349888	0.00246265	-0.0734951	0.707659	-0.186759	-0.215651	0.195532	-0.54865	-0.259011	-0.547257	-0.403911	-1.487	0.232989	-1.51649	-1.60471	-0.915778	0.419046	0.24389	-0.485246	1.51073	-0.322509	0.160665	-0.371686	-0.102852	-0.216604	-0.186863	-0.131095	-0.289022	-0.51341	-1.16684	-1.3579	-0.646432	-0.922539	-0.956041	0.154526	-0.339947	0	0	0	0.349888	-0.449179	-0.123515	-0.723402
ACC	TCGA-OR-A5K9	TCGA-OR-A5K9-01A-11R-A29S-07	0.681083	1.23245	1.18053	1.10321	-0.884739	0.664922	0.746645	NA	NA	NA	-0.0723585	-0.176996	-0.490701	-0.593329	-0.16081	-1.60413	0.712609	-1.626	-1.27041	0.840144	0.777731	1.01855	0.148114	0.683559	0.835674	-0.00256904	0.0384593	-0.333512	-0.330454	0.107916	-0.512776	0.58062	-0.75223	-0.756554	0.570682	-0.227937	-0.199572	-0.0969036	-0.92174	1.30693	0	0	0	-0.884739	0.339272	-0.561998	-1.88081
ACC	TCGA-OR-A5KB	NA	NA	NA	NA	NA	NA	NA	NA	NA	NA	NA	NA	NA	NA	NA	NA	NA	NA	NA	NA	NA	NA	NA	NA	NA	NA	NA	NA	NA	NA	NA	NA	NA	NA	NA	NA	NA	NA	NA	NA	NA	NA	NA	NA	NA	NA	NA	NA
ACC	TCGA-OR-A5KO	TCGA-OR-A5KO-01A-11R-A29S-07	-2.30194	0.999176	1.22475	1.03247	-1.23176	0.777694	0.860841	1.63825	-0.0144114	0.135968	0.488194	-0.385012	-0.644384	-0.708205	0.138434	-0.95498	0.0845035	-1.63583	-0.389568	-0.373326	0.378797	0.214979	0.517059	0.793528	1.27471	0.29161	-0.177522	-0.537397	-0.369046	0.451559	0.522766	-0.583152	-0.730507	0.362481	-0.891132	-0.884104	-1.05549	-0.0210316	-0.708023	1.89852	0	0	0	-1.23176	-1.15057	-0.739883	-0.855
ACC	TCGA-OR-A5KP	NA	NA	NA	NA	NA	NA	NA	NA	NA	NA	NA	NA	NA	NA	NA	NA	NA	NA	NA	NA	NA	NA	NA	NA	NA	NA	NA	NA	NA	NA	NA	NA	NA	NA	NA	NA	NA	NA	NA	NA	NA	NA	NA	NA	NA	NA	NA	NA
ACC	TCGA-OR-A5KQ	NA	NA	NA	NA	NA	NA	NA	NA	NA	NA	NA	NA	NA	NA	NA	NA	NA	NA	NA	NA	NA	NA	NA	NA	NA	NA	NA	NA	NA	NA	NA	NA	NA	NA	NA	NA	NA	NA	NA	NA	NA	NA	NA	NA	NA	NA	NA	NA
ACC	TCGA-OR-A5KS	NA	NA	NA	NA	NA	NA	NA	NA	NA	NA	NA	NA	NA	NA	NA	NA	NA	NA	NA	NA	NA	NA	NA	NA	NA	NA	NA	NA	NA	NA	NA	NA	NA	NA	NA	NA	NA	NA	NA	NA	NA	NA	NA	NA	NA	NA	NA	NA
ACC	TCGA-OR-A5KT	TCGA-OR-A5KT-01A-11R-A29S-07	-0.0280484	1.69646	0.196405	-0.872678	-0.152747	0.347816	-0.90455	NA	NA	NA	1.34605	0.0465231	0.0706272	-0.0790677	-0.375515	-1.45557	0.0387261	-1.341	-0.489934	0.591844	0.85778	1.38209	0.964782	1.65908	-1.26997	0.805267	0.426876	0.366311	0.549716	-0.158711	0.0366907	-0.346157	0.529515	0.223341	0.671343	0.0834758	0.323015	0.862193	0.29369	-1.44044	0	0	0	-0.152747	0.085132	1.50985	1.55384
ACC	TCGA-OR-A5KU	TCGA-OR-A5KU-01A-11R-A29S-07	0.318967	0.0801881	-1.19069	0.329812	-0.210399	-0.401667	-0.686519	-0.127241	0.585375	0.520244	0.567113	-0.0750972	-0.395793	-0.701671	-0.363137	-0.740588	-0.0166574	-1.42946	-0.699833	1.05118	0.673134	0.333773	0.282714	0.594704	-0.538381	0.375292	0.172711	-0.283916	-0.507418	-0.125206	0.805255	-0.675467	0.0376112	-0.0207732	0.952337	-0.200501	-0.935857	-0.000690286	-0.911731	-0.652532	0	0	0	-0.210399	-1.15057	-0.505505	-0.229241
ACC	TCGA-OR-A5KV	TCGA-OR-A5KV-01A-11R-A29S-07	0.637076	0.453257	-1.2249	0.362107	-1.88066	-0.365055	-3.20989	NA	NA	NA	0.00669265	-0.103038	-0.571593	-0.237648	-0.480276	-0.289975	0.908064	-1.29901	-1.87214	1.21071	1.38729	1.8296	0.211703	1.87968	-0.471643	-0.0898817	0.200821	-0.448254	0.345175	-0.27781	1.59996	0.951401	0.53036	-1.31058	1.08942	0.914094	0.979535	0.268485	0.58359	-0.502923	6.92691	1.55517	0	-1.88066	-0.549258	-0.720553	-1.08762
ACC	TCGA-OR-A5KW	TCGA-OR-A5KW-01A-11R-A29S-07	0.351171	0.163633	0.0900035	0.753913	-0.596726	-0.187517	-1.33504	0.627806	-0.532461	-0.226522	0.0552504	0.100046	0.0677247	-0.610327	-0.193023	-1.4676	0.529907	-1.50284	-0.455148	1.69964	1.04781	1.34294	1.52425	1.38415	0.247005	0.243116	0.401208	0.45156	-0.294781	0.0609596	-0.121947	0.0484061	-0.352753	0.43856	1.93253	0.402824	0.311347	1.20496	-0.0073371	0.508376	2.33086	5.51899	0	-0.596726	-0.577655	-0.558608	-0.377882
ACC	TCGA-OR-A5KX	TCGA-OR-A5KX-01A-11R-A29S-07	-0.913044	-0.887489	-0.954655	-0.133921	-1.49726	0.639908	-1.11564	-0.258294	-0.830768	-0.445123	-0.096984	-0.25709	-0.359099	-0.139241	-0.257414	-1.25467	-0.112442	-1.17142	-1.53743	-0.201101	0.224541	-0.374456	-0.273512	0.848811	0.147048	0.0752424	0.0262076	-0.158634	0.502703	0.0112756	0.243295	-0.674579	0.837694	-0.87614	-0.719267	-0.911377	-1.5214	-0.439351	-0.573332	0.292019	0	0	0	-1.49726	-0.00125888	0.29728	-0.843109
ACC	TCGA-OR-A5KY	TCGA-OR-A5KY-01A-11R-A29S-07	2.65334	1.04679	1.45633	0.337216	-0.735062	1.21632	0.369591	0.797647	-1.14655	-0.784419	0.851384	-0.0874419	-0.533019	-0.0197775	0.154244	-0.483116	1.03586	-1.93399	-0.229323	0.952336	1.39743	1.49132	0.840316	1.78628	0.324525	0.499685	0.179669	-0.381352	0.595322	0.467359	1.36337	0.803317	-1.26027	0.744065	1.05006	0.96715	0.435955	1.21771	0.479436	0.78239	0	0	1.61158	-0.735062	0.343754	-0.494512	-0.257065
ACC	TCGA-OR-A5KZ	TCGA-OR-A5KZ-01A-11R-A29S-07	1.32012	1.31749	1.46697	-0.666717	-0.672771	0.577381	-0.439342	-1.25247	-1.48782	-1.02935	1.41774	0.0555256	-0.373873	-0.16056	0.223664	-0.747177	0.581152	-1.9	-0.679741	0.0666951	0.550538	0.620622	-0.142975	0.707717	1.58126	0.845032	0.3868	-0.11066	0.477797	0.560096	0.951219	0.324392	-0.809444	-0.0215925	-0.291735	-0.633636	-0.617011	-0.176427	-0.809797	2.05202	0	0	0	-0.672771	0.932182	0.589878	-0.576999
ACC	TCGA-OR-A5L1	NA	NA	NA	NA	NA	NA	NA	NA	NA	NA	NA	NA	NA	NA	NA	NA	NA	NA	NA	NA	NA	NA	NA	NA	NA	NA	NA	NA	NA	NA	NA	NA	NA	NA	NA	NA	NA	NA	NA	NA	NA	NA	NA	NA	NA	NA	NA	NA
ACC	TCGA-OR-A5L2	NA	NA	NA	NA	NA	NA	NA	NA	NA	NA	NA	NA	NA	NA	NA	NA	NA	NA	NA	NA	NA	NA	NA	NA	NA	NA	NA	NA	NA	NA	NA	NA	NA	NA	NA	NA	NA	NA	NA	NA	NA	NA	NA	NA	NA	NA	NA	NA
ACC	TCGA-OR-A5L3	TCGA-OR-A5L3-01A-11R-A29S-07	0.342853	-0.577402	-1.66763	-1.64559	-1.88066	-1.94718	-1.31278	NA	NA	NA	-0.856907	-0.834555	-0.274092	-1.0003	-0.832972	-2.30208	0.554991	-1.20184	-1.98219	-0.190667	1.24213	0.800707	-1.89105	2.65558	-0.955251	-0.425931	-0.702317	-0.146025	-0.802772	-0.662074	-1.45401	0.464702	0.364293	-1.57746	-0.405592	1.10194	-0.347268	-1.91613	1.43466	-1.18427	0	0	0	-1.88066	-0.232914	-0.20696	-1.88081
ACC	TCGA-OR-A5L4	TCGA-OR-A5L4-01A-11R-A29S-07	-0.408152	0	0.0986877	1.66628	0.253805	0.27183	0.793351	NA	NA	NA	0.138817	-0.0103637	-0.189091	-0.245184	-0.282774	-1.80561	0.791605	-1.33568	-0.678821	1.03666	0.89297	2.5631	2.05867	1.72473	0.458449	0.107639	0.287168	0.0409386	0.327073	-0.0368454	-0.557633	0.657598	0.254771	-0.0667814	0.901431	-0.077292	1.48952	1.60856	0.334742	0.976609	0	0	0	0.253805	-1.15057	-0.0791148	0.577082
ACC	TCGA-OR-A5L5	TCGA-OR-A5L5-01A-11R-A29S-07	-0.652957	-0.388792	-1.58884	-0.140447	0.0299876	-0.138692	-0.13934	NA	NA	NA	0.676221	-0.0178848	0.145113	-0.558365	-0.410913	-0.816364	0.255148	-1.39908	0.326258	1.38492	1.53457	1.97751	1.18471	2.27875	-0.899799	0.643599	0.266921	0.350407	-0.193683	-0.162119	0.911819	-0.206573	0.950696	1.22884	1.63836	1.74045	1.08098	1.39175	0.99917	-1.10167	0	0	0	0.0299876	1.10734	1.5837	1.46523
ACC	TCGA-OR-A5L6	TCGA-OR-A5L6-01A-11R-A29S-07	-0.281834	-1.43858	0.437545	-1.4089	0.216749	0.154687	-0.0979091	NA	NA	NA	0.525817	-0.128019	-0.0680639	-0.433537	-0.220956	-1.43078	0.128983	-1.36773	-1.09752	0.121551	0.394557	0.164728	-0.299402	2.04696	-0.646812	0.431055	0.136099	0.122988	0.0139443	0.0515833	-0.109693	-0.356498	0.552534	-0.516978	-0.169507	-0.679701	-0.961534	-0.434393	0.835809	-0.734317	0	0	0	0.216749	0.326438	1.17888	1.21958
ACC	TCGA-OR-A5L8	TCGA-OR-A5L8-01A-11R-A29S-07	0.207423	1.86144	-0.774231	1.41622	-1.55117	1.03203	1.16662	NA	NA	NA	0.151084	-0.785503	-0.24419	-0.707091	-0.361417	-0.773482	0.337362	-1.96597	-1.20101	-1.35192	1.0655	0.368001	-1.03485	0.660185	0.0869122	0.0529656	-0.649646	-0.0898395	-0.498176	-0.10294	0.779511	-0.00909625	-1.52203	-0.560025	-1.84311	0.472951	-0.821264	-1.37392	-0.925258	0.300469	0	0	0	-1.55117	-1.15057	-0.569234	-0.948377
ACC	TCGA-OR-A5L9	TCGA-OR-A5L9-01A-11R-A29S-07	1.4097	-2.00569	-0.501817	-3.17169	1.17497	-0.713484	0.364681	NA	NA	NA	0.0199147	-0.429412	-0.434148	-0.46952	-0.741627	-1.91049	-0.0155715	-1.05643	-1.92106	-0.19016	0.052577	-1.00495	-1.25548	1.89505	-1.40412	-0.00236467	-0.180476	-0.311779	0.00302037	-0.547592	-0.701855	-0.37419	0.914675	-1.44122	-0.42897	-1.10582	-2.29658	-1.7133	0.648178	-1.6282	0	0	0	1.17497	1.70781	1.06697	1.33587
ACC	TCGA-OR-A5LA	TCGA-OR-A5LA-01A-11R-A29S-07	0.742914	-1.22812	-1.41415	-0.685209	-0.0707551	-0.882524	-0.59204	NA	NA	NA	-0.23533	-0.157106	-0.359501	-0.533324	-0.649469	-1.87549	0.389382	-1.03626	-0.833353	1.05067	1.28346	1.73126	0.723159	3.12712	-1.14257	-0.0682387	0.107244	-0.182678	-0.202056	-0.464964	-0.660952	0.154534	1.30381	-0.215557	1.12447	1.03489	0.874194	0.746713	2.07876	-1.41383	0	0	0	-0.0707551	1.49398	1.42715	1.68876
ACC	TCGA-OR-A5LB	TCGA-OR-A5LB-01A-11R-A29S-07	0.970046	0.347062	0.0538025	0.997487	-0.571228	-1.4149	0.746933	NA	NA	NA	-0.370154	-0.470837	-0.283851	-0.469541	-0.294708	-1.43199	0.742648	-1.71938	-0.996865	-0.300535	0.528213	0.894205	-0.0409383	0.887162	0.141428	-0.173968	-0.259045	-0.0774709	-0.0982754	-0.0547188	-0.056541	0.593047	-1.07687	-0.295123	-0.188935	-0.349634	-0.0708573	0.0646426	-0.595769	0.418143	0	0	0	-0.571228	-0.851181	-1.32853	-0.113994
ACC	TCGA-OR-A5LC	TCGA-OR-A5LC-01A-11R-A29S-07	1.12665	0.23227	1.31037	-1.49852	-1.37249	-0.583567	-0.442485	NA	NA	NA	0.887876	-0.34027	-0.0833872	-0.114198	-0.129834	-1.01617	0.73393	-1.72538	-1.67498	-0.342458	0.655883	1.12588	-0.343698	1.74039	-0.130561	0.523823	-0.126521	0.114165	0.383357	0.137546	0.386417	0.556441	-0.641291	-1.12387	-0.700125	-0.304382	-0.0886602	-0.153901	0.377954	0.058001	0	0	0	-1.37249	-0.745502	0.0966252	0
ACC	TCGA-OR-A5LD	TCGA-OR-A5LD-01A-11R-A29S-07	1.07108	-1.66733	0.920206	-1.19735	-1.03932	0.823086	-0.920326	-0.875443	-0.996249	-0.643959	0.572183	-0.844734	-0.505948	-0.354051	-0.356109	-1.84871	-0.0221577	-1.92617	-2.88708	-2.76598	0.218393	-1.01159	-3.06488	1.09569	0.0248717	0.311865	-0.648078	-0.378546	0.128893	-0.100061	-0.670573	-0.278032	-1.3837	-2.60868	-3.9427	-0.981059	-2.27326	-3.33014	-0.259598	0.183471	0	0	0	-1.03932	-0.124265	-0.313895	-0.500909
ACC	TCGA-OR-A5LE	TCGA-OR-A5LE-01A-11R-A29S-07	-1.17309	0.373195	1.01561	-0.245316	-0.501968	-0.768884	-1.61506	NA	NA	NA	-0.855118	-0.332862	-0.462431	-0.811129	-0.206235	-2.05407	0.898151	-1.32336	-1.80856	0.511911	0.790393	2.02756	-0.688286	1.42706	1.0977	-0.42971	-0.124402	-0.274207	-0.588304	0.0612039	-0.945606	0.951724	-0.136996	-1.26183	0.065551	-0.293782	1.1001	-0.389314	0.0104743	1.52758	0	0	0	-0.501968	-1.15057	-1.66954	-0.992076
ACC	TCGA-OR-A5LF	NA	NA	NA	NA	NA	NA	NA	NA	NA	NA	NA	NA	NA	NA	NA	NA	NA	NA	NA	NA	NA	NA	NA	NA	NA	NA	NA	NA	NA	NA	NA	NA	NA	NA	NA	NA	NA	NA	NA	NA	NA	NA	NA	NA	NA	NA	NA	NA
ACC	TCGA-OR-A5LG	TCGA-OR-A5LG-01A-11R-A29S-07	0.740395	-0.0296409	0	-0.0237972	-1.51266	-1.63859	-0.751132	1.21872	-0.281882	-0.569693	-0.244892	-0.380194	-0.287533	-0.767151	-0.343763	-0.908977	0.348702	-1.42844	-1.32212	-0.312092	0.81059	1.16079	-0.479539	1.70451	0.125493	-0.110593	-0.156419	-0.0599501	-0.488632	-0.0999334	0.448995	-0.0212619	0.462759	-0.746815	-0.564793	0.173178	0.166677	-0.64899	0.324865	0.425189	0	0	1.15141	-1.51266	0.30879	0.25752	0.19255
ACC	TCGA-OR-A5LH	TCGA-OR-A5LH-01A-11R-A29S-07	0.413267	-0.307283	-1.88093	-0.455527	0.857326	-2.16916	-1.36655	-0.458059	-0.35981	0.0571572	-0.334166	-0.105748	-0.161352	-0.433213	-0.467936	-1.24597	0.465895	-1.00615	0.188117	1.21526	1.68273	2.48536	0.519632	2.14097	-0.821074	0.0122548	0.179687	0.0854908	-0.00592728	-0.246137	0.296261	0.304898	1.60352	1.0999	1.30585	1.41407	1.51204	0.732424	0.821637	-1.09458	0	0	0.573371	0.857326	0.705329	0.96548	0.56028
ACC	TCGA-OR-A5LI	NA	NA	NA	NA	NA	NA	NA	NA	NA	NA	NA	NA	NA	NA	NA	NA	NA	NA	NA	NA	NA	NA	NA	NA	NA	NA	NA	NA	NA	NA	NA	NA	NA	NA	NA	NA	NA	NA	NA	NA	NA	NA	NA	NA	NA	NA	NA	NA
ACC	TCGA-OR-A5LJ	TCGA-OR-A5LJ-01A-11R-A29S-07	-2.84408	1.05282	0.994053	-1.23741	0.478518	1.23053	0.446973	-1.21751	-1.13365	-1.24612	0.208649	-0.468989	-0.45648	-0.274321	-0.0724009	-0.655146	0.828658	-1.78869	-0.337455	-0.0651405	0.332692	0.601214	-0.791812	1.1216	-0.152112	0.129559	-0.238132	-0.258513	0.146663	0.21838	0.987103	0.705242	-0.631567	0.570529	-0.184067	-0.808832	-0.474375	-0.879832	-0.305103	-0.0313184	0	0	0.356617	0.478518	1.613	0.91023	0.271299
ACC	TCGA-OR-A5LK	TCGA-OR-A5LK-01A-11R-A29S-07	-0.806464	-0.845273	-1.07202	-0.457404	0.747572	0.266089	0.231783	0.270668	-0.343692	-0.208502	0.115521	-0.143897	-0.272726	-0.194065	-0.411883	-1.03228	0.0923945	-1.085	-0.424564	-0.527735	0.583438	0.49376	-0.280163	2.04145	-1.22358	0.145967	0.118479	-0.0126534	0.322546	-0.156119	0.543791	-0.424278	1.37234	0.5016	-0.984097	-0.194419	-0.599349	-0.47111	0.857275	-1.4062	0	0	0.867086	0.747572	1.50507	1.85076	1.69436
ACC	TCGA-OR-A5LL	TCGA-OR-A5LL-01A-11R-A29S-07	-0.282584	0.836275	-1.82727	1.6972	0.587285	-1.81362	0.335689	1.25819	-0.490445	-0.62072	-0.650798	-0.74828	-0.613149	-1.03238	-0.591182	-1.77056	-0.0408582	-1.15386	-1.15605	-0.930574	0.0321855	1.00257	-2.02127	0.735594	0.276083	-0.344317	-0.624477	-0.514652	-0.820021	-0.351393	-0.911103	-0.682452	0.150126	-0.47674	-1.24157	-1.07763	-0.0378009	-2.27527	-0.880851	0.403406	0	0	0	0.587285	-0.783803	-0.336831	-0.229046
ACC	TCGA-OR-A5LM	TCGA-OR-A5LM-01A-11R-A29S-07	-0.166021	-0.372945	-0.269387	0.803308	0.490643	-0.794532	-0.542989	-0.521128	-0.0464395	-0.790009	-0.308733	-0.00842221	-0.190333	-0.27807	-0.262098	-1.52689	0.734463	-1.22677	-0.353386	1.66589	0.727838	1.87541	1.34428	2.61031	-0.101318	-0.112696	0.26799	0.0567688	0.168991	-0.0186472	-0.212874	0.787491	0.756414	0.373042	1.89011	-0.132093	0.816498	1.5138	1.44063	0.014411	0	0	0	0.490643	-0.533569	-0.268632	-0.0319085
ACC	TCGA-OR-A5LN	TCGA-OR-A5LN-01A-11R-A29S-07	-0.946126	-1.20087	-1.01821	-1.21168	0.152129	0	0.0355377	0.561873	-0.196339	-0.149319	-0.304004	-0.375831	-0.356281	-0.293648	-0.509124	-1.44775	0.336758	-1.13206	-1.23488	-0.575852	0.52521	0.709198	-0.828986	2.17441	-0.88236	-0.182497	-0.14724	-0.156494	0.279481	-0.273291	-0.0754204	0.0206625	1.26694	-0.598244	-1.03001	-0.362728	-0.393624	-0.96203	0.885888	-0.999239	0	0	0	0.152129	1.41094	1.66478	1.35345
ACC	TCGA-OR-A5LO	TCGA-OR-A5LO-01A-11R-A29S-07	1.13901	-0.0953461	0.147705	0.400593	-0.0043701	0.456787	0.928862	-0.636844	-1.56479	-0.867665	0.0292468	-0.0045939	-0.118208	-0.0601006	-0.156465	-0.507143	0.523685	-1.67733	-0.503583	0.699793	0.415715	0.674836	-0.367064	0.472939	-0.101738	0.0329461	0.262156	0.101945	0.427501	0.122521	1.17723	0.258482	-0.801799	0.339679	0.558266	-0.794954	-0.443891	-0.19474	-1.10168	-0.0796569	0	0	0	-0.0043701	0.00192038	-0.812759	-0.969349
ACC	TCGA-OR-A5LP	TCGA-OR-A5LP-01A-11R-A29S-07	0.168964	-0.141606	-1.09827	1.22778	1.01248	0.302998	0.845469	-0.813531	-0.801165	-0.22217	0.492767	0.00899102	0.0996917	-0.192768	-0.404197	-0.81633	0.468018	-1.32659	0.0750279	0.627204	0.875226	2.05704	1.05901	1.43292	-0.816442	0.258829	0.303732	0.340245	0.348379	-0.15623	0.791228	-0.0105336	0.842974	0.912811	0.2984	0.222509	0.992885	1.0651	0.0128653	-0.826915	0	0	0.736937	1.01248	0.876073	0.888599	1.01267
ACC	TCGA-OR-A5LR	TCGA-OR-A5LR-01A-11R-A29S-07	-0.375068	-0.629288	-1.0814	0.527848	0.791504	-0.608786	0.0103819	NA	NA	NA	-0.428047	-0.058117	-0.0193462	-0.538301	-0.269076	-1.42463	0.142077	-1.17082	-0.226242	1.37858	1.55798	1.16675	0.590437	0.928447	-0.364398	-0.134175	0.211758	0.161108	-0.217415	-0.00600442	-0.0118648	-0.366142	1.20599	0.543357	1.47713	1.80301	0.0529807	0.618967	-0.605568	-0.273547	0.680705	0	0	0.791504	-0.00104293	-0.0125773	0.0208586
ACC	TCGA-OR-A5LS	TCGA-OR-A5LS-01A-11R-A29S-07	0.27608	-0.423909	0.342073	1.35747	0.132117	0.0959154	-0.00525467	-1.08801	-1.40488	-0.734701	-0.741608	-0.742491	-0.444971	-0.576564	-0.231162	-1.46116	0.644474	-1.73427	-0.929509	-0.504822	1.46473	1.22054	0.0262811	1.51709	0.211775	-0.408405	-0.608853	-0.37784	-0.329781	0.0252015	-0.16742	0.417774	-1.00819	-0.269926	-0.614711	1.10823	0.144873	-0.0592314	0.107031	0.432366	0	0	0	0.132117	-1.15057	-0.393376	0.0599486
ACC	TCGA-OR-A5LT	TCGA-OR-A5LT-01A-11R-A29S-07	-0.069873	-0.249322	0.414384	0.654039	1.0014	0.841147	0.228215	1.37704	-0.0928642	-0.332734	0.182719	-0.281367	-0.225769	-1.02958	-0.243185	-1.03635	-0.0975296	-1.35767	-1.10996	0.289187	0.716954	-0.0466923	-0.256481	0.757347	-0.0533826	0.205939	-0.0872048	-0.0456428	-0.862305	0.0265832	0.182791	-0.733202	-0.138787	-0.435617	0.111507	-0.0239282	-1.22065	0.052047	-0.715784	0.0687976	3.66931	0	0.538209	1.0014	-0.373419	0	-0.471081
ACC	TCGA-OU-A5PI	TCGA-OU-A5PI-01A-12R-A29S-07	1.14841	0.636971	-0.360163	1.01148	-0.422087	-0.0118987	0.759279	0.27941	-0.354151	-0.555166	0.517212	-0.304744	-0.180293	-0.416799	-0.217035	-0.295765	0.0718264	-1.67176	-0.2291	0.285194	1.18962	0.850475	0.408739	0.578565	-0.180317	0.305167	-0.105862	-0.0225393	-0.0781754	0.03844	1.54868	-0.642227	-0.658431	0.534651	0.214306	0.633484	-0.252186	0.567662	-1.04043	-0.134531	0.851905	0	0.665555	-0.422087	-0.370614	-0.519671	-0.0149429
ACC	TCGA-P6-A5OF	TCGA-P6-A5OF-01A-11R-A29S-07	0.688093	0.755478	0.179523	1.12237	-0.400375	0.938664	1.17836	NA	NA	NA	0.695827	0.0475297	-0.100214	-0.252965	-0.194121	-0.452139	-0.136543	-1.60863	0.161569	0.44737	0.656324	0.22476	0.214769	0.411179	-0.355125	0.401589	0.378891	0.168711	0.222167	0.0729009	1.30332	-1.18954	-0.190238	1.15207	0.498981	-0.252582	-0.993714	-0.303218	-1.19495	-0.396891	0	0.836404	0.288715	-0.400375	-0.119247	-0.583573	0.751067
ACC	TCGA-P6-A5OG	TCGA-P6-A5OG-01A-22R-A29S-07	0.0902928	2.95786	1.62897	0.0238364	3.66901	1.62429	1.38263	-0.644465	-0.790243	0.878373	2.26206	0.426556	0.118106	0.660905	0.153678	-0.963416	-0.217701	-1.56815	-0.453857	-0.241903	-0.590507	-0.572706	-0.276549	0.182959	0.0948117	1.69506	0.903188	0.547002	1.65254	0.493756	0.752716	-0.596716	0.217077	0.675419	-0.646752	-2.42306	-1.86162	-0.308184	-1.33541	0.321249	0	0	0	3.66901	2.13205	1.99408	2.25192
ACC	TCGA-P6-A5OH	NA	NA	NA	NA	NA	NA	NA	NA	NA	NA	NA	NA	NA	NA	NA	NA	NA	NA	NA	NA	NA	NA	NA	NA	NA	NA	NA	NA	NA	NA	NA	NA	NA	NA	NA	NA	NA	NA	NA	NA	NA	NA	NA	NA	NA	NA	NA	NA
ACC	TCGA-PA-A5YG	TCGA-PA-A5YG-01A-11R-A29S-07	-0.469902	-0.13585	-1.40482	0.455729	0.96151	0.101469	0.340433	-0.29705	-0.375107	0.336647	-0.181377	-0.100384	0.0661573	-0.304682	-0.443446	-0.901687	0.60265	-1.36105	0.142487	0.943493	1.9375	2.34136	0.454324	1.92163	-0.661798	0.156663	0.150811	0.332137	0.230775	-0.193208	0.726656	0.160974	0.787949	1.11637	1.01009	2.15658	1.36143	0.610502	0.613194	-0.5767	0.425435	0	0	0.96151	1.55983	1.68999	0.791328
ACC	TCGA-PK-A5H8	TCGA-PK-A5H8-01A-11R-A29S-07	-0.115601	-0.673998	0.271096	0.412796	-0.844733	-0.794075	0.302795	-0.189678	-0.921667	-0.864973	-0.45825	-0.248753	0.00850744	-0.801353	-0.164769	-1.99377	0.610351	-1.35554	-0.908546	-0.0822076	0.137266	0.931902	0.845493	1.52477	0.125315	-0.226819	0.00560356	0.258903	-0.389115	0.110769	-0.766809	0.455581	0.560905	-0.26562	-0.561902	-1.23489	-0.316718	0.261578	0.206629	0.35241	0	0	0	-0.844733	0.328094	-0.63355	-0.67675
ACC	TCGA-PK-A5H9	TCGA-PK-A5H9-01A-11R-A29S-07	0.272479	-0.561238	-1.13573	-0.851143	1.58419	-1.9311	0.990049	1.49035	-0.530138	-0.291448	-0.850088	-0.422428	-0.28096	-0.425403	-0.492374	-1.72981	-0.583096	-0.727734	-0.333748	0.350229	1.81521	2.67942	-1.19604	0.362925	-0.151806	-0.45644	-0.229174	-0.0965711	0.0204503	-0.245605	-0.231718	-1.04976	1.31549	0.81725	0.661931	1.83046	1.87193	-1.46693	-1.26345	-0.197806	0	0	0	1.58419	-0.0391676	0.670134	1.17898
ACC	TCGA-PK-A5HA	TCGA-PK-A5HA-01A-11R-A29S-07	-0.272191	0.42318	-0.591347	0.526699	0.111586	-0.847247	0.353162	0.324366	-0.412541	0.277836	-0.17537	-0.101564	-0.0404424	-0.16858	-0.401862	-1.7004	0.350741	-1.20766	-0.825292	-0.755483	-0.0495486	0.642838	0.0359436	1.0844	-0.680822	-0.11121	0.185244	0.256844	0.391453	-0.157814	-0.19731	-0.129118	0.976919	-0.06526	-1.43418	-1.29307	-0.478141	-0.0633925	-0.34856	-0.754618	0	0	0	0.111586	1.71593	1.50734	1.44538
ACC	TCGA-PK-A5HB	TCGA-PK-A5HB-01A-11R-A29S-07	-2.44445	1.37147	1.77732	1.76306	0.668325	1.27056	0.749765	NA	NA	NA	-0.0363417	-0.01064	-0.5699	-0.0459434	0.0470295	-1.44558	0.939148	-1.53786	-0.659693	0.0518913	0.264563	1.84623	0.443457	1.118	1.11648	0.0928654	0.255648	-0.333042	0.535071	0.350935	0.422121	0.745927	-0.356353	0.31578	-0.3901	-1.05049	0.865542	0.0419463	-0.324207	1.39694	0	0	0	0.668325	0.327148	-1.40196	0.399895
ACC	TCGA-PK-A5HC	NA	NA	NA	NA	NA	NA	NA	NA	NA	NA	NA	NA	NA	NA	NA	NA	NA	NA	NA	NA	NA	NA	NA	NA	NA	NA	NA	NA	NA	NA	NA	NA	NA	NA	NA	NA	NA	NA	NA	NA	NA	NA	NA	NA	NA	NA	NA	NA
BLCA	TCGA-2F-A9KO	TCGA-2F-A9KO-01A-11R-A38B-07	0.524075	0.993922	-0.771271	-0.382051	1.00592	-0.0871022	0.810701	-0.619402	-1.55061	-0.497155	-0.13149	0.200432	0.5454	0.114735	0.235305	0.657405	-0.295274	0.938864	0.513335	0.491391	0.271899	-0.309246	0.537194	-0.59735	0.469378	0.0322517	0.134832	0.34115	0.203782	0.170071	1.00654	-0.67325	-0.195791	1.15912	0.754697	0.522418	-0.291849	0.451023	-1.01272	0.222352	0.784645	0.484469	3.39429	1.00592	1.03444	1.17233	0.416322
BLCA	TCGA-2F-A9KP	TCGA-2F-A9KP-01A-11R-A38B-07	0.82956	0.391332	0.0411611	0.00352925	-0.781394	-0.867656	-0.27198	NA	NA	NA	-1.52077	0.0173724	0.169337	0.0103905	0.185724	-0.0202576	1.34413	1.04071	-0.648025	0.24466	0.293976	0.265743	0.378018	-0.25216	1.31593	-0.622253	-0.0309164	-0.0892714	0.100043	0.155173	0.151824	1.50103	0.239068	-0.14391	0.435684	0.629505	0.564466	0.275578	-0.535734	1.33711	2.85075	1.48642	0.194604	-0.781394	-0.638237	-0.947102	-1.71923
BLCA	TCGA-2F-A9KQ	TCGA-2F-A9KQ-01A-11R-A38B-07	0.113361	-1.62919	-0.139174	0.0985048	-1.14537	-0.242068	0.0854159	-0.606947	-0.612815	0.0794419	-0.862701	0.419087	0.60239	0.153662	0.0244052	-0.346991	0.542517	1.27709	-0.741406	0.8885	0.507811	0.0379164	0.389667	0.395811	0.441309	-0.304587	0.443983	0.414448	0.30921	-0.0642472	-0.236682	0.307563	1.07616	-0.211614	1.39191	1.01135	0.209384	0.25209	0.323732	0.039372	0.164689	1.40734	0	-1.14537	-1.47292	-1.76408	-1.07181
BLCA	TCGA-2F-A9KR	TCGA-2F-A9KR-01A-11R-A38B-07	-0.327687	-1.35196	-0.954049	-0.377694	-0.326441	-1.10057	-0.185963	-2.1926	-2.48837	-0.771874	-0.403681	0.106761	0.259835	0.0601273	0.136811	0.558414	0.0361349	1.03128	-0.120701	0.210762	0.101886	0.258084	1.21065	0.580678	-0.0837567	-0.0280042	0.076509	0.0422892	0.105989	0.0671131	0.970261	-0.397389	0.207979	0.521997	0.458814	0.58707	0.372084	1.24022	0.585034	-0.548386	0.170062	1.21984	0	-0.326441	-0.12181	-0.536238	-1.45588
BLCA	TCGA-2F-A9KT	TCGA-2F-A9KT-01A-11R-A38B-07	-1.08312	-0.440977	1.17281	-0.0706894	-1.24749	-0.583869	-0.406179	-1.763	-1.60856	-1.04778	-0.250697	-0.0181621	0.11366	0.0336646	0.0189639	0.0034068	0.0881111	0.784016	-1.43289	-1.53916	-1.45189	-1.29167	-0.976509	-0.473241	0.236353	-0.0345971	-0.0877168	-0.13323	0.121539	-0.0383562	0.229953	-0.447244	-0.134345	-1.02014	-1.78821	-2.19017	-1.57294	-1.45508	-0.825313	-0.0614167	2.60449	1.79747	1.6328	-1.24749	-1.05589	-1.56531	-0.913676
BLCA	TCGA-2F-A9KW	TCGA-2F-A9KW-01A-11R-A38B-07	1.11756	-0.400551	0.367465	0.402805	1.49896	0.49088	1.0483	NA	NA	NA	-0.140864	0.104916	0.550032	0.0811708	0.232027	-0.180104	0.446653	0.212165	0.0380824	-0.280784	-0.285142	0.665669	-0.60076	0.61935	1.56856	0.0490707	0.0779226	0.292909	0.219277	0.20171	-0.0628248	0.0290475	-1.09316	0.673449	-0.490788	-0.416993	1.1354	-0.868232	0.586436	1.46035	1.69194	1.11785	1.14949	1.49896	-1.18878	-1.13297	-0.0428111
BLCA	TCGA-4Z-AA7M	TCGA-4Z-AA7M-01A-11R-A39I-07	0.308947	-1.87681	0.526916	-0.487871	-0.387371	-0.69002	-0.50034	-0.11413	-0.203562	0.16356	-0.843961	-0.280678	-0.084499	-0.457284	0.268416	-0.0106172	0.0675732	0.697155	-0.569614	-0.311715	-0.321229	-0.423581	-0.577404	-0.472682	1.35908	-0.288027	-0.426957	-0.349902	-0.55674	0.266901	0.039772	-0.363159	-0.551593	-0.0911898	-0.395165	-0.262668	-0.382571	-0.998885	-0.819987	1.19713	2.20367	1.04216	0.41215	-0.387371	-0.853183	0.0614291	-0.889376
BLCA	TCGA-4Z-AA7N	TCGA-4Z-AA7N-01A-11R-A39I-07	-0.0627045	1.13913	-0.74457	0.860109	1.00004	1.05057	1.51442	NA	NA	NA	0.451663	0.216346	0.421464	0.373982	-0.0345401	1.27537	-1.26497	0.659927	0.299591	-0.859311	-0.218333	-0.937535	-0.563357	-1.03495	-1.54129	0.346443	0.135447	0.182836	0.447447	-0.211209	1.91633	-1.53222	-0.962959	0.918933	-1.2481	-0.24674	-1.14992	-1.16282	-1.5126	-1.8105	0.0770083	-0.245963	0	1.00004	1.76311	2.04561	0.642646
BLCA	TCGA-4Z-AA7O	TCGA-4Z-AA7O-01A-31R-A39I-07	0.172859	-1.174	0.323881	-0.22393	-0.331556	-0.242642	-0.306535	-0.367655	-0.785642	0.0848697	-0.618146	0.0933483	0.211358	-0.186615	0.078631	0.140588	-0.0498141	1.44381	-1.26463	-0.994879	-0.483174	-0.470879	-0.609126	-0.298975	0.503151	-0.179258	0.033716	-0.04097	-0.13688	0.0241944	0.373849	-0.65232	1.34951	-0.908618	-1.23219	-0.611131	-0.600987	-1.07142	-0.590972	0.326173	-0.168912	-0.461701	0.285174	-0.331556	0.659061	0.296019	-0.0472586
BLCA	TCGA-4Z-AA7Q	TCGA-4Z-AA7Q-01A-11R-A39I-07	-0.0700579	0.365084	-0.101112	0.884558	1.35895	0.0111115	-0.018681	-0.711494	-0.343237	0.350147	-0.41084	-0.135225	0.251571	-0.146929	0.130492	0.108051	0.652162	1.51742	-0.108798	0.273699	0.0457065	-0.27748	1.07509	0.351411	-0.608741	-0.0555048	-0.204076	0.0188616	-0.167963	0.0680911	0.238422	0.342734	1.21993	0.48808	0.279466	0.134535	-0.2138	0.958742	0.221573	-0.978213	1.84671	2.50268	0	1.35895	1.45098	1.35512	0.976347
BLCA	TCGA-4Z-AA7R	TCGA-4Z-AA7R-01A-11R-A39I-07	-1.13213	-0.10614	-0.106981	0.252893	-1.01622	-0.196425	0.0159874	-0.353034	0.0407799	-0.750946	-0.712538	-0.0469182	-0.137077	-0.152618	0.257763	-0.499587	0.553949	0.564577	-0.0395435	0.837996	0.395074	0.859413	1.48388	0.22147	1.2337	-0.233266	-0.118857	-0.423322	-0.0289912	0.257812	-0.564905	0.214382	-0.792485	0.567442	1.11346	0.982255	1.19511	1.60788	0.0535393	1.04557	2.60906	0.951615	3.65807	-1.01622	-1.26762	-0.703546	-0.62608
BLCA	TCGA-4Z-AA7S	TCGA-4Z-AA7S-01A-11R-A39I-07	0.306696	-0.108794	-0.0648379	0.470724	-0.823112	-0.697813	-0.555392	-0.351912	-1.2533	0.321568	-1.74716	0.243303	0.708784	-0.0261867	0.0906707	-0.484496	1.26487	1.62906	-1.11998	0.296459	0.363144	0.732371	0.300055	0.514946	0.833226	-0.727832	0.239429	0.55935	0.0402505	0.0368318	-0.494692	1.21365	1.91561	-0.720539	0.803821	0.873584	1.27208	0.0995377	0.454466	0.697746	-0.0247016	-0.33519	0	-0.823112	-1.25439	-0.872906	-1.47268
BLCA	TCGA-4Z-AA7W	TCGA-4Z-AA7W-01A-11R-A39I-07	0.0612241	1.00424	0.38881	-1.04864	1.00593	0.36492	-0.7353	-0.628971	-0.792359	-1.11984	0.0690163	0.00914466	-0.0149302	-0.324501	-0.0957911	-0.903019	0.787521	1.22584	-2.13821	-0.25202	-0.593549	-0.332434	0.100611	1.44308	-0.766971	0.152412	-0.0947231	-0.283569	-0.461159	-0.198125	-1.23741	0.639688	0.842426	-1.96199	-0.378322	-0.71137	-0.263032	-0.405139	1.69387	-0.816232	-0.168912	1.93769	0	1.00593	2.33272	2.19263	1.13533
BLCA	TCGA-4Z-AA7Y	TCGA-4Z-AA7Y-01A-11R-A39I-07	0.0677757	-0.395315	-0.118903	2.06005	-0.821457	-0.798394	-0.703717	-0.356307	-0.138429	-0.916639	-1.16297	0.538154	0.753524	0.025488	-0.000621187	-1.04851	0.60121	1.75028	-1.07074	1.20058	0.642424	0.993791	1.40896	0.44824	0.775435	-0.428954	0.609815	0.623728	0.144787	-0.0741464	-1.22865	0.260624	2.06308	-0.619749	1.79138	1.10937	1.47732	1.39113	0.346194	0.589841	-0.168912	0.231582	0	-0.821457	-1.62407	-2.22567	-1.18408
BLCA	TCGA-4Z-AA80	TCGA-4Z-AA80-01A-11R-A39I-07	-2.15466	0.232033	0.167855	0.167152	0.0636457	-1.5634	-1.68987	-0.815896	1.03951	-0.0320439	-1.92191	-0.356094	0.388655	-0.311338	0.204347	-0.435335	0.888488	1.18326	-0.930199	0.179928	0.815458	0.548155	0.304524	0.355951	1.52439	-0.78732	-0.469556	0.169883	-0.297739	0.179111	-0.404839	0.798662	0.805234	-0.460612	0.0719952	1.33165	0.83667	0.298623	0.196646	1.62761	2.43222	2.11799	0.827447	0.0636457	-0.281148	0.542136	-0.874825
BLCA	TCGA-4Z-AA81	TCGA-4Z-AA81-01A-11R-A39I-07	0.0960306	0.318859	1.37013	-1.03135	1.97395	-1.0867	-1.3557	-2.00005	-0.55617	-0.925751	-1.61366	-0.322364	0.525332	-0.782626	0.0105693	-1.62276	1.25697	1.68034	-2.62732	-1.2231	-1.22718	-0.347645	-0.0116594	-0.414395	0.609146	-0.688166	-0.467477	0.29751	-1.00488	-0.054657	-2.16159	1.24931	2.0283	-2.48213	-1.39369	-1.7798	-0.317323	-0.442339	-0.701679	0.556617	-0.168912	-0.461701	0	1.97395	0.684341	0.518474	0.559239
BLCA	TCGA-4Z-AA82	TCGA-4Z-AA82-01A-11R-A39I-07	0.507298	0.662795	1.34596	0.452996	0.259666	0.74243	0.861387	-0.444029	0.514363	0.239664	0.740312	0.210363	0.325379	0.749511	0.220212	0.331026	0.265426	0.432731	-0.115025	-0.254622	-0.789246	-0.307817	0.63578	-0.474169	0.560942	0.505983	0.164177	0.0912453	0.947507	0.19716	0.700416	-0.197519	-0.911305	0.460788	-0.201823	-0.99493	-0.325681	0.426405	-0.815264	0.27456	-0.168912	-0.327538	0	0.259666	-0.502559	-0.456878	0.471389
BLCA	TCGA-4Z-AA83	TCGA-4Z-AA83-01A-11R-A39I-07	0.19204	-0.397267	-2.14475	1.89591	0.677565	-0.0553489	0.227774	-0.606168	-0.109138	-0.841973	0.290053	0.597936	0.489816	0.294985	-0.227509	-0.875435	-0.470034	1.56412	-1.09456	0.265082	-0.917874	-1.05229	-0.26749	-0.290423	-1.43181	0.273749	0.638527	0.277187	0.448617	-0.44082	-1.06996	-0.993991	1.46612	-0.700427	0.763885	-1.20156	-1.26684	-0.423472	-0.545337	-2.09193	-0.168912	0.486433	0	0.677565	-0.0823171	0.28994	-0.586882
BLCA	TCGA-4Z-AA84	TCGA-4Z-AA84-01A-11R-A39I-07	0.906218	2.32702	0.377328	-1.06543	1.24694	-0.728415	-0.456056	-1.02983	0.053716	-0.798746	-0.419765	-0.0828828	-0.396916	-0.0696854	0.144391	-0.692267	1.54252	0.801747	-0.878597	-0.59671	-0.290802	-0.735952	0.314351	0.230379	1.04266	-0.0373017	-0.165724	-0.781112	-0.0375073	0.100242	-0.994551	1.39565	-0.1605	-0.390317	-0.947833	-0.520353	-0.797567	0.138254	0.0796462	0.923183	2.6905	0.269006	0	1.24694	-0.71203	-0.422612	0.0589268
BLCA	TCGA-4Z-AA86	TCGA-4Z-AA86-01A-11R-A39I-07	0.212415	0.457436	0.0158851	0.728796	1.4785	0.582721	0.854873	-2.19791	-0.473839	-1.14692	1.43664	0.37536	0.268169	0.409814	0.239925	0.306361	-0.452255	-0.266616	-0.332222	0.00251842	-0.572954	0.0303363	-0.0471989	-0.73721	0.586779	0.86776	0.334929	0.0974537	0.526361	0.205689	0.462565	-1.02266	-1.96978	0.214768	-0.0401028	-0.841971	0.0822825	-0.405863	-1.15789	0.360396	0.0272708	-0.461701	0	1.4785	1.27222	1.39693	1.71336
BLCA	TCGA-4Z-AA87	TCGA-4Z-AA87-01A-11R-A39I-07	0.91806	1.31856	0.830558	-1.00018	1.38416	-0.696786	-1.70367	-0.806198	-0.461687	0.0959369	-1.41014	-0.353424	-0.079415	-0.407105	0.18456	-0.625975	1.59601	1.12036	-1.29696	0.292803	0.623908	0.0402731	-0.613332	0.816639	1.43741	-0.57907	-0.486893	-0.336363	-0.514777	0.168591	-0.874025	1.73391	0.717863	-1.0499	0.0210634	1.05376	0.20075	-0.910968	0.815043	1.51521	2.81147	0.41651	0	1.38416	0.53258	0.901295	0.259335
BLCA	TCGA-4Z-AA89	TCGA-4Z-AA89-01A-11R-A39I-07	0.613643	-0.860365	-0.643995	-0.447929	-0.388953	-1.81691	-1.81889	-0.397516	-1.3162	-0.946777	-1.95165	-0.0342363	0.517014	-0.43657	-0.0678553	-1.12269	0.901711	1.91259	-1.75963	-0.00888167	-0.209426	0.265937	0.158628	0.511835	0.0239452	-0.766406	-0.0947057	0.342857	-0.504187	-0.194938	-1.37275	0.795502	2.64545	-1.44062	0.24124	-0.0866591	0.4843	-0.121631	0.462149	-0.316552	-0.168912	0.542877	0	-0.388953	-0.519399	-1.23392	-1.06529
BLCA	TCGA-5N-A9KI	TCGA-5N-A9KI-01A-31R-A42T-07	0.127804	-1.25188	-1.4277	-0.869238	-0.0389626	0.222439	0.456815	-0.842952	0.388486	-0.9126	-0.253231	0.177471	-0.039423	-0.659848	-0.0226113	-0.41025	-0.540419	1.75013	0.174742	0.923841	0.127207	-0.111639	1.50123	0.399977	-0.369295	0.0134462	0.146513	-0.303203	-0.808048	-0.146187	-0.416891	-0.912638	1.61805	0.995641	1.78256	0.474631	0.0937394	1.68909	0.331383	-0.849393	0.0703686	-0.251788	0.201747	-0.0389626	-0.142527	-0.426514	8.7631e-05
BLCA	TCGA-5N-A9KM	TCGA-5N-A9KM-01A-11R-A42T-07	-1.15814	-1.1751	-2.65636	1.72647	-1.21325	-0.0819749	-0.043662	NA	NA	NA	-0.14526	0.159399	0.665813	-0.628392	-0.247849	-0.481367	0.0999676	1.03287	-0.35912	1.00622	0.793798	0.0686982	1.34572	0.850162	0.0118498	0.120073	0.0879172	0.486157	-0.780131	-0.478223	-0.676945	-0.326758	0.413915	0.116971	1.07602	1.37119	0.264041	1.29683	0.935518	-0.295713	-0.168912	1.78979	0	-1.21325	-0.232391	0.0995709	-0.215205
BLCA	TCGA-BL-A0C8	TCGA-BL-A0C8-01A-11R-A10U-07	-0.31809	-1.91158	0.651366	-0.629605	-0.534547	0.305854	1.03446	0.500482	0.808808	0.809747	-1.20625	-0.16074	0.117682	0.276065	0.0675262	-0.483117	0.447134	0.958803	0.0393719	0.259709	1.34489	1.03344	-0.252794	0.512783	0.886379	-0.490527	-0.233684	-0.150715	0.511197	-0.0176841	-0.388372	0.00622299	0.172804	0.702906	0.360429	2.13172	1.59724	-0.537252	0.397968	0.432998	0.29193	0.859595	0	-0.534547	-1.37685	-1.38902	-0.694132
BLCA	TCGA-BL-A13I	TCGA-BL-A13I-01A-11R-A13Y-07	0.437125	0.572313	0.150899	0.0121712	0.142402	1.9564	2.09655	-0.343656	0.745872	-0.224529	2.15016	0.221845	0.123072	-0.0377053	0.143537	-0.714576	0.753604	-2.04953	0.665053	0.0633979	0.223105	0.0577861	1.45223	0.283627	0.235388	1.33892	0.16394	-0.121266	0.125693	0.0781739	-0.953357	0.483966	-3.28658	1.31403	0.0372054	0.450555	0.26614	1.29812	0.121088	0.133551	2.48971	2.33845	3.00933	0.142402	0.719218	0.908753	1.30962
BLCA	TCGA-BL-A13J	TCGA-BL-A13J-01A-11R-A10U-07	0.218426	0.470777	0.635959	0.944338	0.799997	-0.0742432	0.666899	-1.12542	-1.63715	-0.96049	-0.193423	0.353849	0.14984	-0.0979768	0.121905	0.213328	0.0561382	0.993947	-0.350603	0.324204	-0.45872	-0.750214	0.0632352	-0.33198	0.748777	0.0136323	0.347047	-0.10538	-0.11663	0.064809	0.348101	-0.473804	0.101609	0.160824	0.601444	-0.739464	-0.978476	-0.141269	-0.658519	0.445864	-0.168912	-0.461701	0	0.799997	-0.649688	-0.00593626	-0.185782
BLCA	TCGA-BL-A3JM	TCGA-BL-A3JM-01A-12R-A21D-07	0.637491	0.106658	1.88717	-0.00989293	0.474659	-0.137003	0.112394	-0.823135	-0.996409	-1.53774	0.222909	-0.211221	-0.0606694	-0.367226	0.42525	1.36938	1.12864	-0.815879	-0.282381	-0.036781	0.0286893	0.203057	-1.17005	-1.29586e-05	2.35232	0.188928	-0.337438	-0.333697	-0.410756	0.45816	2.13888	0.721868	-2.24027	0.455283	0.120553	0.215918	0.582143	-1.71074	-0.141646	1.96166	-0.168912	0.312562	0	0.474659	0.842857	-0.429218	-0.27029
BLCA	TCGA-BL-A5ZZ	TCGA-BL-A5ZZ-01A-31R-A30C-07	-1.17578	0.78294	-0.151354	1.95188	0.818253	2.25025	1.82674	NA	NA	NA	2.01828	0.772441	0.301866	0.696041	0.145581	1.12419	-0.182669	-1.7202	0.956558	0.361093	-0.134768	-0.00017412	0.729835	-0.0695726	0.025	1.05323	0.798505	0.120179	0.993778	0.0809801	1.73079	-0.603197	-3.33659	1.89262	0.765901	0.0414285	0.222783	0.7225	-0.268329	-0.115491	0.0800959	0.698892	1.90017	0.818253	0.248443	0.466723	0.99547
BLCA	TCGA-BT-A0S7	TCGA-BT-A0S7-01A-11R-A10U-07	1.35307	1.61295	0.928604	-0.075399	-1.09828	0.460562	-0.0362314	-0.933501	-0.2624	0.205846	-0.109885	0.082024	0.158877	0.554028	0.201273	-0.12532	1.47139	-0.988345	-0.584354	0.298294	0.530857	1.28444	0.40314	0.191454	1.7553	0.00877551	0.0114642	-0.12772	0.728412	0.169669	0.0217896	1.20867	-2.72777	-0.0609239	0.679099	1.03059	1.94726	0.262472	0.00484812	1.48733	2.30711	2.32325	2.219	-1.09828	-0.804586	-0.575301	-0.973519
BLCA	TCGA-BT-A0YX	TCGA-BT-A0YX-01A-11R-A10U-07	-0.120233	0.893996	0.543263	1.74857	0.51692	-0.354671	-0.163959	0.903154	1.03758	0.353912	-0.782132	0.360463	0.549868	0.4097	0.132927	0.204937	1.56774	0.872978	0.746844	1.09962	0.136465	0.727995	2.18772	0.717441	1.22286	-0.268071	0.395668	0.406804	0.529849	0.0681807	0.493107	1.33991	-0.0684962	1.49239	1.59695	0.381084	1.16058	2.1253	0.686022	1.07616	2.03042	0.524215	0.539291	0.51692	0.698519	0.0924679	0.295724
BLCA	TCGA-BT-A20J	TCGA-BT-A20J-01A-11R-A14Y-07	0.276691	0.960832	0.94144	0.00522782	0.784418	0.511813	-0.215622	-1.7179	-1.64518	-1.04614	-0.902343	0.032959	0.241197	-0.525249	0.174046	0.0414651	1.20299	0.961368	0.108781	0.586145	0.106072	-0.0259076	1.5026	-0.111316	0.33833	-0.318722	-0.0287126	-0.04325	-0.692499	0.121803	0.23188	0.868235	-0.178157	0.769184	0.900599	0.305681	0.135486	1.5687	-0.321513	0.159442	1.78723	2.56835	0	0.784418	0.958192	0.85029	0.950352
BLCA	TCGA-BT-A20N	TCGA-BT-A20N-01A-11R-A14Y-07	-3.02788	0.808245	0.54836	2.4682	-0.460357	-0.963597	-0.65605	-1.13285	-2.14507	-1.81151	-0.594098	0.122963	-0.0699547	-0.00347808	0.194432	-0.221895	1.60823	0.544179	-0.682473	0.199982	-0.352007	0.0710307	1.34116	-0.298808	1.77753	-0.171962	0.102864	-0.332287	0.0495157	0.188278	-0.174673	1.63312	-0.589383	-0.183015	0.706922	-0.417482	0.245271	1.39138	-0.57377	1.87859	-0.168912	-0.461701	0	-0.460357	-1.17184	-1.44418	-0.585046
BLCA	TCGA-BT-A20O	TCGA-BT-A20O-01A-21R-A14Y-07	0.188391	0.208592	0.929387	1.3173	1.39399	1.23485	2.01162	-1.88551	-1.81402	-2.04673	0.976101	0.106483	0.292809	-0.422458	0.208332	-0.744046	0.2138	-1.74489	0.907366	0.289666	-0.0755607	0.155962	1.79265	-0.446585	0.445792	0.673796	0.0222816	0.0480471	-0.503536	0.151977	-1.02499	-0.198267	-2.95848	1.59646	0.368915	0.0630024	0.329629	1.67732	-0.790605	0.283416	1.96581	1.70865	3.14801	1.39399	2.33762	1.90553	1.87029
BLCA	TCGA-BT-A20P	TCGA-BT-A20P-01A-11R-A14Y-07	-0.0619382	-0.84702	-0.408127	0.123968	-0.742645	-0.659964	-0.621329	-1.32113	-0.225272	-1.46212	-0.928578	0.22906	0.435223	-0.197615	-0.0486931	-0.546978	0.324864	0.836963	-1.08642	0.71129	-0.179951	-0.91244	0.824175	0.906265	-0.53155	-0.278551	0.213413	0.209502	-0.0931354	-0.14391	-0.519663	0.123732	0.0234477	-0.622635	1.08994	0.0841387	-1.08665	0.661508	1.00353	-0.932708	-0.168912	-0.259568	0	-0.742645	-1.06987	-1.34435	-1.61226
BLCA	TCGA-BT-A20Q	TCGA-BT-A20Q-01A-11R-A14Y-07	-0.241596	-0.723446	-1.17818	1.64369	0.265018	0.25969	1.11719	-0.957321	-1.19152	-0.589133	0.569841	0.122372	0.476794	0.128405	-0.0799267	0.275537	-0.797014	0.818163	0.181271	0.204783	0.396447	-0.0248856	0.156288	-0.0219994	-0.248346	0.470114	0.0664531	0.301974	0.203764	-0.261609	0.4653	-1.34964	-0.499083	0.72214	0.207031	0.402061	0.121176	-0.127446	-0.189148	-0.794875	-0.168912	-0.461701	0	0.265018	0.853509	0.803037	0.490412
BLCA	TCGA-BT-A20R	TCGA-BT-A20R-01A-12R-A16R-07	0.292459	-0.405766	-0.688804	1.06799	-0.107084	1.63395	1.38887	-0.724829	-1.33505	-0.972551	1.43251	0.305065	0.447515	-0.132928	0.130774	0.380016	-0.825219	0.653125	0.869912	0.235697	0.461524	0.0549777	0.999701	0.216996	0.984435	0.813082	0.26843	0.263617	-0.132885	0.0591945	0.738854	-1.28361	-0.658681	1.69544	0.221213	1.14441	0.363884	0.83007	0.0629349	0.567868	2.23086	1.40506	0.201435	-0.107084	-0.613677	-0.582359	0.351798
BLCA	TCGA-BT-A20T	TCGA-BT-A20T-01A-11R-A14Y-07	0.14919	-0.756629	-0.313398	-0.311075	-0.251454	0.733561	1.1691	-1.56858	-0.650139	-1.06419	0.332305	0.149315	0.424004	0.203093	0.000776641	0.652674	-0.63054	1.1418	-0.523825	-0.566431	0.158079	-0.799677	-0.336295	0.535389	-0.133272	0.240753	0.0975924	0.237186	0.277521	-0.114441	1.06811	-1.3483	0.31226	-0.0877975	-0.769766	0.415027	-0.939079	-0.648897	0.50723	-0.522199	-0.168912	1.73966	0.329186	-0.251454	0.758592	0.253885	0.259301
BLCA	TCGA-BT-A20U	TCGA-BT-A20U-01A-11R-A14Y-07	1.31946	0.547173	0.631237	1.06907	-0.27257	-0.14093	0.283751	-1.2049	-2.28435	-1.40653	0.125644	0.286566	0.0721887	-0.0173065	0.185246	0.542421	1.5143	0.779109	0.560374	0.792789	0.221295	0.689486	1.95324	-0.0666482	1.74882	0.170438	0.275557	-0.154525	0.0144435	0.141594	0.878353	1.26	-0.479632	1.2671	1.04621	0.393394	1.03662	1.95044	-0.312129	1.51352	1.1293	1.69316	0	-0.27257	-0.22691	-0.398211	-0.223823
BLCA	TCGA-BT-A20V	TCGA-BT-A20V-01A-11R-A14Y-07	0.899865	-0.231099	1.48376	-1.55715	2.09901	-1.23946	-1.89264	-2.3961	-1.65447	-1.88005	-1.9404	-0.192164	0.419638	0.0564514	0.182943	0.182752	1.39387	1.11506	-0.470098	0.210525	-0.530197	-0.109029	0.904511	-0.370584	0.382173	-0.843071	-0.312059	0.228297	-0.0243996	0.157032	0.302183	1.31057	0.447212	0.0662767	0.281617	-0.647789	0.116659	0.813886	-0.666699	0.159746	-0.168912	2.02694	1.52241	2.09901	-0.125262	-0.17646	1.67699
BLCA	TCGA-BT-A20W	TCGA-BT-A20W-01A-21R-A14Y-07	1.61427	0.402156	0.839353	0.130953	-0.22182	0.09401	1.08319	-1.44986	-1.14904	-0.972258	-0.0448192	0.063583	0.253713	0.386793	0.264369	0.970843	0.592353	0.724721	0.311236	0.0279118	0.504756	0.15899	0.0606129	0.275109	0.639382	0.119186	-0.0135085	0.000392089	0.617743	0.246046	1.55335	0.277576	-1.00375	0.940009	0.192275	1.0017	0.387292	-0.215489	0.13631	0.39196	0.146325	0.525199	0.460713	-0.22182	0.285498	0.657665	-0.200221
BLCA	TCGA-BT-A20X	TCGA-BT-A20X-01A-11R-A16R-07	-2.72943	1.25284	0.54097	1.90771	0.200013	1.05349	0.334005	-1.26437	-2.11935	-1.06378	0.245403	0.466995	0.171118	0.306525	0.167206	-0.184503	0.604354	-0.19997	-0.211265	0.911501	-0.556145	0.489044	0.722856	0.609132	1.14413	0.237062	0.483956	-0.0237612	0.417681	0.116259	-0.085638	0.0837497	-1.6153	0.424905	1.17443	-0.780993	0.44408	0.700501	0.567576	1.01124	-0.168912	2.45375	3.05161	0.200013	0.116435	0.0135288	0.11877
BLCA	TCGA-BT-A2LA	TCGA-BT-A2LA-01A-11R-A18C-07	0.868128	-1.09423	0.626528	-0.750882	-1.52676	0.0781735	0.546742	-0.140457	1.52488	-0.556115	0.30699	-0.107314	-0.0642578	0.278249	0.467055	0.658231	0.956494	-1.73702	0.229156	-0.720853	-1.19927	-0.669403	0.269898	-0.0374868	0.987289	0.426887	-0.217151	-0.413415	0.428915	0.487313	1.1058	0.565015	-3.123	1.24227	-0.773153	-1.57246	-0.707171	0.0764088	-0.214976	0.67209	2.76251	2.23362	1.59009	-1.52676	-1.24139	-0.444053	-1.02232
BLCA	TCGA-BT-A2LB	TCGA-BT-A2LB-01A-11R-A18C-07	0.597401	0.0913246	0.132862	-0.484335	0.465731	0.420144	0.33929	0.255894	-0.0551399	-0.483252	0.670043	0.244313	0.247679	-0.0757778	0.0106834	0.273866	-0.123321	1.24175	-0.214875	0.755461	0.373329	-0.105377	0.449499	0.189862	-0.412987	0.524787	0.213119	0.0261821	-0.0501831	-0.0929794	0.423332	-0.649855	0.336244	0.333828	0.952991	0.842283	0.0338251	0.331759	0.0516999	-0.924979	0.615498	0.996019	0	0.465731	0.461908	0.372235	0.0379974
BLCA	TCGA-BT-A2LD	TCGA-BT-A2LD-01A-12R-A20F-07	0.857903	-0.744294	0.327731	-0.881948	1.52836	-0.487521	-0.704545	-1.13751	0.657332	-0.138513	-0.0648124	0.112452	0.0904461	-0.88771	0.0438316	-0.350736	-0.173909	0.282087	-1.29284	-1.43594	-1.06644	-0.172691	-0.405282	-0.110511	0.659542	0.0395921	0.0363183	-0.133721	-1.10726	-0.0361686	-0.559663	-0.446868	-0.981465	-0.904912	-1.78441	-1.5938	-0.046032	-0.801781	-0.375416	0.443695	1.88279	0.25596	0	1.52836	-0.109709	-0.568097	0.988363
BLCA	TCGA-BT-A3PH	TCGA-BT-A3PH-01A-11R-A220-07	-0.770801	-0.167851	1.40948	-0.553485	-1.02631	-0.281041	-0.312032	-1.86567	-1.79931	-1.49895	-1.16758	0.0606867	-0.108487	-0.319283	0.0586751	-0.974987	0.388168	1.19758	-1.58157	-0.923533	-0.24711	0.168455	-0.240362	0.241833	0.80314	-0.484973	0.00427611	-0.369906	-0.257555	0.0193495	-1.13857	0.163645	1.06098	-1.18001	-0.868915	-0.343605	0.427115	-0.416402	0.109144	0.570514	0.0339066	-0.220974	0	-1.02631	-0.940966	-0.834729	-0.925858
BLCA	TCGA-BT-A3PJ	TCGA-BT-A3PJ-01A-21R-A220-07	0.503299	0.351126	0.949883	0.661001	1.95243	-0.380029	-0.375736	-1.38761	-0.488689	-0.293287	0.573801	0.119523	0.167117	0.0163697	0.187301	-0.684331	0.150631	0.206639	-1.30103	-0.261774	-0.970928	-0.355438	-0.723898	-0.85102	1.10521	0.414378	0.0761321	-0.0167147	-0.0145052	0.148175	-0.832697	-0.286024	-1.0749	-0.924755	-0.509086	-1.45375	-0.436637	-1.36912	-1.38545	1.05384	0.721716	0.262839	1.50391	1.95243	0.351003	0.275605	1.52843
BLCA	TCGA-BT-A3PK	TCGA-BT-A3PK-01A-21R-A220-07	0.141537	0.486622	1.11854	1.08798	1.27739	1.50803	1.07628	-1.53421	-1.19392	0.825908	0.855126	0.435258	0.366796	0.55991	0.156912	0.682107	0.24636	0.318978	0.186924	-0.0250478	-0.446929	-0.0150148	0.149527	0.0353638	0.255151	0.478771	0.457597	0.175636	0.775001	0.0974386	1.20039	-0.25379	-1.26725	0.86355	-0.0143893	-0.635867	0.175078	-0.103709	-0.200536	0.024775	1.3448	2.45385	1.50099	1.27739	0.189215	0.382241	0.760987
BLCA	TCGA-BT-A42B	NA	NA	NA	NA	NA	NA	NA	NA	-0.475218	-0.95871	1.03711	NA	NA	NA	NA	NA	NA	NA	NA	NA	NA	NA	NA	NA	NA	NA	NA	NA	NA	NA	NA	NA	NA	NA	NA	NA	NA	NA	NA	NA	NA	NA	NA	NA	NA	NA	NA	NA
BLCA	TCGA-BT-A42C	TCGA-BT-A42C-01A-11R-A23N-07	0.649854	-0.638662	-0.345661	0.964097	-0.645911	-1.06907	-0.857681	-0.304318	0.902477	0.574722	-1.44087	0.0829414	0.60057	-0.0885499	0.175508	-0.260368	0.973565	1.60424	0.0419274	0.844466	0.98851	-0.0178836	0.908729	0.874304	0.505391	-0.578685	0.0443518	0.361205	-0.0654861	0.135385	-0.137782	0.85102	1.37925	0.737004	1.11936	1.79316	0.104315	0.603863	0.910861	0.396637	-0.061524	1.75198	0	-0.645911	-1.41032	0.0218957	-1.41552
BLCA	TCGA-BT-A42E	TCGA-BT-A42E-01A-11R-A23W-07	0.0549905	1.0068	0.685784	1.218	0.834764	-0.145675	-0.384056	-1.1488	-0.531191	-0.870345	0.566231	0.295624	0.62896	0.629703	0.227575	-0.0729807	0.910204	0.269684	-0.627066	-0.466288	-1.0485	-0.721832	0.381031	-0.0153735	0.344833	0.388278	0.277686	0.481375	0.82962	0.200835	0.0757773	0.711284	-1.13066	-0.0543217	-0.602494	-1.52932	-0.791187	0.12924	-0.150532	0.332456	-0.168912	0.0128442	0	0.834764	1.12651	1.41264	0.826661
BLCA	TCGA-BT-A42F	TCGA-BT-A42F-01A-11R-A23W-07	-0.863209	1.64284	-0.278796	1.04473	1.09633	0.438146	-0.699914	NA	NA	NA	0.338346	0.140992	0.179912	-0.178914	-0.0241093	-0.47165	1.98531	0.959461	-1.36517	-0.137349	-0.154236	0.846953	1.46342	1.10678	0.303969	0.22576	0.104134	-0.0261633	-0.226444	-0.121103	-0.553321	1.99998	0.226635	-0.979118	-0.244435	-0.121147	1.41189	1.34639	1.24556	0.286437	0.655003	2.5803	0	1.09633	1.03613	1.09021	0.998689
BLCA	TCGA-C4-A0EZ	TCGA-C4-A0EZ-01A-21R-A24X-07	0.524635	-0.882544	1.25499	0.154663	-1.55064	-0.155906	0.484583	0.114441	1.49774	1.84366	-0.256758	-0.170909	-0.351712	0.441244	0.476991	-0.670962	0.679713	-1.03982	-0.979557	-0.956648	-0.399454	-0.104096	-0.66693	0.803476	0.997578	0.0504995	-0.277775	-0.692297	0.604665	0.537082	-0.886065	0.257948	-2.51851	-0.131344	-1.01031	-0.423677	0.248972	-0.907092	0.912169	0.649581	2.52155	-0.212365	0	-1.55064	-1.13083	-1.00659	-0.490201
BLCA	TCGA-C4-A0F0	TCGA-C4-A0F0-01A-12R-A10U-07	-3.49168	1.00961	0.0062377	1.21314	0.893397	1.57464	0.39801	-0.867891	-1.94726	-0.396273	0.818218	0.381467	-0.376106	0.139544	0.08852	-1.75451	1.62467	-1.13287	-1.75211	0.321068	-0.946395	1.16615	0.89727	1.05052	2.47905	0.566978	0.362736	-0.636067	0.173459	0.0410728	-2.43206	1.60618	-2.57206	-1.52631	0.385226	-1.47512	1.78088	0.631856	1.1429	2.44864	-0.168912	1.05622	0	0.893397	-0.619363	-0.254371	0.977675
BLCA	TCGA-C4-A0F1	TCGA-C4-A0F1-01A-11R-A034-07	0.0643852	0.48799	0.669654	2.31969	0.586292	1.19359	-0.00240216	0.599716	-0.311927	0.0527829	0.405181	0.363455	0.546321	0.404401	0.120963	-0.348348	0.775159	0.193624	-0.576385	1.83317	-0.177158	1.97727	0.689094	0.875403	0.966117	0.309378	0.381975	0.307241	0.546137	0.0645308	-0.324793	0.336614	-0.908232	-0.0458158	2.12523	-0.140992	2.3034	0.724036	0.875713	0.710388	2.22765	2.64261	3.24843	0.586292	-0.695129	-0.540411	-0.211512
BLCA	TCGA-C4-A0F6	TCGA-C4-A0F6-01A-11R-A10U-07	0.320004	-0.300375	-0.0946595	0.325856	-0.486795	-0.0852635	0.148659	0.432455	0.22587	-0.781185	-0.526688	0.0942771	0.41085	0.117925	0.00381862	-0.2175	0.825952	0.848075	-0.792082	0.190059	0.677684	1.1604	0.704622	0.341969	0.841749	-0.179905	0.0348975	0.168173	0.24341	-0.0797876	-0.190316	0.662129	-0.182095	-0.30025	0.701003	1.36625	1.71427	0.442175	0.209145	0.63504	0.827288	-0.461701	0.651716	-0.486795	-0.747691	-0.538254	-0.927542
BLCA	TCGA-C4-A0F7	TCGA-C4-A0F7-01A-11R-A084-07	0.886632	1.40688	1.10913	0.742877	0.0862644	0.0188292	0.840122	-0.821881	-0.039349	-0.0752379	0.0133758	0.295037	0.184985	0.337839	0.301804	0.52776	1.49985	-0.379287	-0.0473353	-0.135067	-0.0923751	0.989209	0.775218	0.759859	2.04811	0.116856	0.268522	-0.0520426	0.496333	0.321201	1.02821	1.47441	-2.00447	0.589164	0.0416333	0.108917	1.50573	0.751837	0.734527	1.88047	-0.168912	-0.461701	0	0.0862644	-1.04907	-1.38623	-0.571966
BLCA	TCGA-CF-A1HR	TCGA-CF-A1HR-01A-11R-A13Y-07	-0.616686	-0.650051	-0.566201	-0.155265	-0.558749	-0.0464869	-0.027441	-0.449151	-0.0106132	0.19976	-0.997867	-0.0632059	0.304571	-0.0160347	-0.126997	-0.150846	0.520876	1.439	-0.815308	0.352204	0.905999	0.0920441	0.519261	0.464797	-0.453122	-0.339348	-0.165449	0.0910535	0.0316531	-0.275105	-0.00861234	0.181277	1.27903	-0.403227	0.460332	1.52184	0.273079	0.180541	0.40044	-1.03406	-0.168912	1.3384	0	-0.558749	-0.238609	0.34187	-0.0721346
BLCA	TCGA-CF-A1HS	TCGA-CF-A1HS-01A-11R-A13Y-07	0.116163	1.3361	1.8614	1.29649	0.927136	1.17382	0.25753	-1.16825	-0.505584	-0.215587	0.97676	0.32167	0.11423	0.394909	0.300316	0.307254	0.80806	0.125516	-0.581673	-0.127139	-1.06139	0.4532	0.562872	-0.302062	0.936174	0.560044	0.321713	-0.102466	0.522715	0.300183	0.595525	0.486319	-1.23438	-0.0440188	-0.0592217	-1.55867	0.67419	0.486852	-0.606053	0.876216	-0.168912	-0.461701	0	0.927136	-0.581532	-0.534072	0.486147
BLCA	TCGA-CF-A27C	TCGA-CF-A27C-01A-11R-A16R-07	-0.895922	-0.47847	-1.48476	-0.320769	-0.0817155	-1.48708	-0.926221	-0.191019	-0.380824	-0.488774	-2.5068	-0.300177	0.121481	-0.529954	-0.105008	-1.17466	0.964548	1.8182	-1.80288	-0.281799	-0.504437	-0.77476	0.689669	-0.0129406	0.416254	-1.07399	-0.382757	-0.128703	-0.522113	-0.255668	-1.37554	0.915998	2.49706	-1.49693	-0.21351	-0.661794	-0.956711	0.59719	-0.189791	0.0555488	-0.168912	-0.0997178	0	-0.0817155	-1.24632	-0.982745	-1.87238
BLCA	TCGA-CF-A3MF	TCGA-CF-A3MF-01A-12R-A21D-07	0.473615	-1.45756	-0.796376	-0.725775	-0.112942	-0.23567	-0.195555	-0.368024	-1.32932	-0.659901	-1.47779	-0.401106	-0.182695	0.223956	-0.348598	-1.07361	-0.143933	1.26097	-2.73326	-2.19025	-1.28894	-2.97537	-2.98368	-0.619945	-1.18224	-0.565273	-0.521086	-0.487875	0.387501	-0.527947	-1.25797	-0.463543	1.12962	-2.6191	-2.75522	-1.64275	-3.86566	-3.79899	-0.920025	-1.65531	-0.168912	0.0943215	0	-0.112942	-1.08997	-1.22169	-1.77613
BLCA	TCGA-CF-A3MG	TCGA-CF-A3MG-01A-11R-A20F-07	-0.848681	-0.130238	0.388353	0.281463	-0.857616	-1.8271	-1.74527	-0.849548	0.439192	-0.752705	-2.58053	0.0709023	0.422172	-0.408127	-0.170661	-1.71711	1.16553	1.89492	-2.11794	0.780054	-0.233042	-0.0171276	1.97343	0.39712	0.524217	-1.13535	0.0582681	0.261243	-0.431536	-0.27003	-2.14945	1.2796	2.78252	-1.89224	1.28759	-0.333587	0.0870361	2.02846	0.327106	0.342805	-0.168912	-0.0538128	0	-0.857616	-2.0707	-1.45593	-2.24483
BLCA	TCGA-CF-A3MH	TCGA-CF-A3MH-01A-11R-A20F-07	0.281502	-0.749507	-0.669785	0.0420908	-1.51735	-1.23988	-1.0003	-0.180691	-0.192273	-0.231828	-1.57683	0.177591	0.373329	0.0421423	-0.198586	-0.79877	0.675145	2.03055	-1.67053	0.342608	-0.315613	-0.57827	1.08319	0.643256	-0.603905	-0.630317	0.18143	0.145398	0.15705	-0.340495	-0.837233	0.500855	3.05836	-1.33692	0.593151	-0.353535	-0.636456	0.908185	0.650636	-1.17825	-0.168912	-0.461701	0	-1.51735	-1.83906	-1.80806	-1.53025
BLCA	TCGA-CF-A3MI	TCGA-CF-A3MI-01A-11R-A20F-07	0.509615	-0.536632	0.343871	-1.00126	-1.1396	0.188999	-0.0974634	-0.658907	-0.226327	0.584066	-0.672889	0.0876593	0.214458	0.312348	-0.218406	-0.670878	0.407577	1.50613	-1.64089	-0.79386	-0.814282	-0.628077	-1.51635	1.30705	-0.565857	-0.235462	0.0306522	-0.00897963	0.509073	-0.372885	-0.678977	0.245681	1.69055	-1.35433	-1.00249	-1.28936	-0.638363	-2.07835	1.54534	-1.00056	-0.168912	-0.461701	0	-1.1396	-0.531061	-0.194131	-0.698382
BLCA	TCGA-CF-A47S	TCGA-CF-A47S-01A-11R-A23W-07	0.865665	-0.610945	-3.6125	0.700964	-0.336738	-1.27046	-1.42248	-0.826403	-0.305012	-0.529213	-1.44359	0.0644668	0.394332	-0.285002	-0.430071	-0.891299	0.625595	2.08922	-1.61917	0.238869	0.0313942	-0.641557	0.251931	0.711234	-1.19921	-0.561373	0.0336498	0.201321	-0.259529	-0.714147	-1.04088	0.428512	3.03983	-1.37506	0.281304	0.238234	-0.689765	0.128367	0.731122	-1.88432	-0.0820407	-0.461701	0	-0.336738	-0.22448	-0.580486	-1.1908
BLCA	TCGA-CF-A47T	TCGA-CF-A47T-01A-11R-A23W-07	1.16202	-0.191813	0.0375572	-1.67763	-1.73685	-0.225418	-0.816488	-0.397872	-0.368348	-0.0932471	-0.529019	-0.0850719	0.00383475	-0.136775	-0.108414	-0.317461	1.30323	1.32012	-1.74794	-0.14473	-0.119521	0.0687108	0.314775	1.40277	0.190861	-0.128857	-0.14986	-0.212642	-0.049245	-0.205519	-0.255969	1.55089	1.28988	-1.41262	0.101796	-0.129075	0.383349	0.180856	1.60924	0.00419219	0.543826	-0.461701	0	-1.73685	-1.52732	-1.08697	-1.73085
BLCA	TCGA-CF-A47V	TCGA-CF-A47V-01A-11R-A23W-07	0.446253	-1.32531	-1.63531	0.606755	-0.367464	0.0841371	0.337391	0.359651	0.270527	-0.733357	-0.664947	0.0549385	0.508881	0.374682	-0.209439	-0.372368	-1.01225	1.23884	-1.54268	-0.886263	-0.36656	-1.99021	-1.35169	-0.10328	-1.58525	-0.172383	0.0147535	0.323737	0.644011	-0.394629	-0.247784	-1.63731	0.856812	-1.22009	-1.06529	-0.247231	-2.56337	-1.83651	-0.297886	-2.23163	-0.168912	-0.461701	0	-0.367464	-0.581736	-0.716337	-0.623917
BLCA	TCGA-CF-A47W	TCGA-CF-A47W-01A-11R-A23W-07	1.46269	-0.351937	-1.15479	-0.287978	-1.05646	-0.445726	-1.54967	-0.219044	-0.876084	-0.183298	-1.53612	-0.186257	0.138625	-0.0660793	-0.283817	-1.12019	1.03143	1.56449	-2.17021	0.222866	0.079675	0.68047	0.689061	2.02498	-0.711229	-0.563521	-0.275521	-0.0957819	0.0417168	-0.462752	-1.30842	1.03214	1.7086	-1.90003	0.410612	0.231471	1.13203	0.573148	2.42087	-1.18442	-0.168912	-0.461701	0	-1.05646	-1.61502	-0.393491	-1.8138
BLCA	TCGA-CF-A47X	TCGA-CF-A47X-01A-31R-A23W-07	0.271285	0.379322	-2.67111	-0.849419	-0.399406	-1.05601	-0.730561	NA	NA	NA	-1.53332	-0.242036	0.33879	-0.392165	-0.297602	-0.52181	0.625023	1.69511	-1.37058	-0.565718	0.248699	-0.424188	-0.14088	0.496236	0.42606	-0.597472	-0.317084	0.116115	-0.368507	-0.54742	-0.511926	0.390567	1.93366	-0.959493	-0.420161	0.727055	-0.421931	-0.252813	0.436198	-0.00645235	0.226916	0.807227	0	-0.399406	-1.07626	-1.13518	-1.42513
BLCA	TCGA-CF-A47Y	TCGA-CF-A47Y-01A-11R-A23W-07	0.921506	-1.0358	-2.1574	-0.138995	-0.950515	-0.685197	-0.685988	-0.510804	-0.229627	0.106161	-1.46666	-0.110978	0.102673	-0.26124	-0.331096	-0.697016	0.321109	1.5027	-1.69401	-0.602279	-0.618311	-1.0103	0.0919447	0.367624	-1.03379	-0.534182	-0.186653	-0.153487	-0.178348	-0.572387	-0.755006	-0.0669019	1.44798	-1.365	-0.71382	-0.755538	-1.23035	-0.128044	0.299665	-1.69113	-0.168912	-0.461701	0	-0.950515	-0.706359	-1.00304	-1.3672
BLCA	TCGA-CF-A5U8	TCGA-CF-A5U8-01A-11R-A28M-07	0.397183	-1.13309	-2.80271	0.133739	-1.40761	-1.04399	-1.16904	0.353671	0.678424	0.244866	-1.78467	-0.402795	0.223954	-0.678529	-0.389493	-1.15045	0.826958	1.55668	-2.17309	-0.422398	-0.108483	-0.41902	-0.092604	0.756861	-0.52682	-0.698239	-0.521658	-0.00885158	-0.77032	-0.639861	-1.37999	0.742759	1.70309	-1.94841	-0.635668	0.105156	-0.371512	-0.302881	0.799191	-1.12059	-0.168912	-0.0802878	0	-1.40761	-2.0707	-1.18963	-1.62858
BLCA	TCGA-CF-A5UA	TCGA-CF-A5UA-01A-11R-A28M-07	0.589578	-0.0560063	-0.554365	-0.919421	-1.78456	-0.408965	-1.25652	0.351976	0.0506548	1.02563	-0.486663	-0.0788535	0.261923	-0.209049	-0.247847	-0.918105	0.809822	1.10276	-2.20462	0.123572	0.15154	0.276243	0.0577668	1.89529	-0.384076	-0.0896414	-0.111473	0.0379899	-0.165504	-0.388497	-1.03612	0.65302	0.796724	-1.93115	0.0673053	0.295407	0.558251	-0.233578	2.24777	-0.634593	-0.168912	-0.461701	0	-1.78456	-1.04238	-0.958619	-1.53473
BLCA	TCGA-CF-A7I0	TCGA-CF-A7I0-01A-22R-A352-07	0.326215	-0.0834666	-1.28773	-0.0502293	-1.03246	0.121388	0.718345	NA	NA	NA	-0.684592	0.097801	0.416496	0.306611	-0.109828	0.138807	0.364997	1.21361	-0.690384	-0.0373235	0.249222	0.00897672	-0.507867	0.871635	-0.469379	-0.175346	0.0398573	0.235941	0.516136	-0.255908	0.418503	0.0218	0.606519	-0.197895	0.289146	0.757427	0.152191	-0.857526	0.931634	-1.04412	-0.168912	-0.461701	0	-1.03246	-0.221911	-0.116899	-0.857758
BLCA	TCGA-CF-A8HX	TCGA-CF-A8HX-01A-11R-A36F-07	-0.238026	-2.75373	-0.188541	-1.03328	-1.34495	-0.783268	-0.0697783	-0.476514	-0.197953	-0.141399	-1.64342	-0.203701	-0.0463372	0.00501757	-0.108551	-0.490339	0.462647	1.14976	-1.84078	-0.386741	-0.320957	-1.99245	-1.40437	-0.283779	-0.743206	-0.639767	-0.289758	-0.360722	0.0543302	-0.205854	-0.508079	0.234657	0.899394	-1.49823	0.208401	0.204702	-2.55881	-1.73552	-0.506311	-1.22967	-0.168912	-0.461701	0	-1.34495	-1.74388	-1.40333	-1.24604
BLCA	TCGA-CF-A8HY	TCGA-CF-A8HY-01A-11R-A36F-07	0.785448	-0.225977	-1.14946	-1.21781	-1.70431	-0.428244	-1.15752	-0.84141	-0.398283	-0.182547	-0.950952	0.20998	0.127788	0.0489878	-0.324959	-0.813128	1.01498	1.26728	-2.27476	0.0579841	-0.206581	0.057307	0.466121	2.18576	-0.750062	-0.295025	0.201527	-0.104015	0.200342	-0.494733	-0.860397	1.02159	1.27914	-2.03153	0.412245	-0.215053	0.399376	0.264281	2.61607	-1.11996	-0.168912	1.32858	0	-1.70431	-0.868506	-0.710618	-1.1892
BLCA	TCGA-CF-A9FF	TCGA-CF-A9FF-01A-11R-A38B-07	0.421405	-0.890973	0.00894348	-0.0902368	-0.420264	0.0577105	1.00851	-0.641575	-0.0794772	-0.0192309	-0.406114	0.263586	0.501249	0.160871	-0.0494169	-0.203366	0.00700707	1.52095	-0.535485	0.0558205	0.419153	-0.630974	-0.864454	1.24392	-0.505287	-0.0676355	0.262382	0.311795	0.339906	-0.149294	-0.0634161	-0.402346	1.50238	-0.0472196	0.16578	0.875598	-0.770352	-1.34144	1.44015	-0.891811	-0.168912	0.178369	0	-0.420264	0.234444	0.330264	-0.363182
BLCA	TCGA-CF-A9FH	TCGA-CF-A9FH-01A-11R-A38B-07	0.192696	-0.409787	-0.529271	0.646492	0.25127	-1.24367	-1.14686	-0.472939	-0.211113	-0.302918	-1.78329	0.0690808	0.373776	-0.420086	-0.0353806	-1.33656	0.715006	1.56571	-1.59231	0.291123	-0.220775	-0.452492	0.329969	0.472971	-0.303503	-0.719807	0.0477599	0.195649	-0.371842	-0.136096	-1.67017	0.586058	1.78523	-1.20262	0.911512	0.0412434	-0.393136	0.318824	0.431933	-0.687527	-0.168912	-0.461701	0	0.25127	-1.2511	-1.35335	-0.857521
BLCA	TCGA-CF-A9FL	TCGA-CF-A9FL-01A-11R-A38B-07	-0.0205993	-0.827359	-0.341403	-0.206577	-0.811583	0.0156928	0.307442	-0.0148423	-0.653433	-1.07354	-0.0473004	0.0773722	0.250873	-0.00319385	0.0366233	-0.0430956	-0.601276	1.12854	-0.538745	-0.444216	-0.146006	-0.669931	-0.34478	0.343186	0.466834	0.109383	0.0107732	0.0193587	0.0827986	-0.0588784	0.0760897	-1.17338	0.232631	0.0347293	-0.472959	-0.147959	-0.805675	-0.516198	0.23949	0.101688	-0.168912	1.4127	0.425875	-0.811583	-0.826585	-0.571097	-0.345472
BLCA	TCGA-CF-A9FM	TCGA-CF-A9FM-01A-11R-A38B-07	0.719241	-1.42092	-3.74505	0.972343	0.349225	-1.08405	-0.772135	0.206402	0.0438189	-0.133675	-1.08632	0.0498203	0.559282	-0.062749	-0.333369	-0.659815	0.501782	1.90536	-1.07623	-0.0655639	-0.0999369	-0.0683883	-0.0951207	0.22831	-0.673882	-0.366993	0.00150088	0.390388	-0.0230331	-0.614088	-0.727403	0.00599864	2.23645	-0.611316	0.140005	0.138635	0.0236756	-0.28862	0.0809054	-1.28551	-0.168912	-0.333719	0	0.349225	-0.385523	-0.625141	-1.07134
BLCA	TCGA-CU-A0YN	TCGA-CU-A0YN-01A-21R-A10U-07	-2.62297	0.680092	1.27291	1.34712	0.545817	0.160382	0.763998	-0.731107	-0.971568	0.825221	0.484369	0.298835	0.223043	0.221887	0.285814	0.208302	0.474775	0.703596	-0.538259	-0.539109	-1.0978	-0.82725	-0.323421	-0.896195	1.13009	0.330957	0.299911	0.0235356	0.272126	0.274574	0.432551	-0.000683749	-0.353735	0.024201	-0.568392	-1.77039	-0.986942	-0.728567	-1.301	0.939833	-0.168912	-0.461701	0	0.545817	0.385251	0.557804	0.581203
BLCA	TCGA-CU-A0YO	TCGA-CU-A0YO-01A-11R-A10U-07	0.169542	0.843878	-1.0605	0.695975	0.715776	0.0716759	1.09544	NA	NA	NA	-0.15185	0.202532	0.485273	0.0974213	-0.0802451	0.507009	-0.0170531	1.65395	0.121722	0.0252834	0.208053	0.154976	-0.47286	0.0874864	-0.417782	0.0646437	0.1456	0.295585	0.114011	-0.251246	0.922864	-0.496257	1.18659	0.749705	-0.0416347	0.375906	0.355367	-1.00409	-0.0597444	-0.897631	-0.00602298	0.527576	0.636813	0.715776	0.215926	0.433299	-0.202926
BLCA	TCGA-CU-A0YR	TCGA-CU-A0YR-01A-12R-A10U-07	-0.409939	0.574625	0.93958	0.41684	1.55109	0.627865	0.682096	NA	NA	NA	0.314409	0.290649	0.345405	-0.130368	0.148334	-0.0700173	0.780638	0.563728	0.171598	-0.483581	0.224618	1.23058	-0.243823	0.702933	1.62928	0.257939	0.273895	0.102818	-0.0952255	0.108265	0.0763195	0.69416	-0.742897	0.719165	-0.63263	0.324105	1.81795	-0.70867	0.694269	1.66259	-0.168912	-0.461701	0.245177	1.55109	0.380284	0.458197	0.790766
BLCA	TCGA-CU-A3KJ	TCGA-CU-A3KJ-01A-11R-A21D-07	-0.810118	1.44852	1.226	4.13765	0.528211	-0.697046	-1.04645	-0.981667	-0.632711	-0.0989747	-0.511866	0.195554	-0.0662614	0.287964	0.227367	-0.419978	0.287691	0.326429	-0.686847	-0.0757239	-0.986425	-0.474673	0.912399	-0.753467	1.24234	-0.148828	0.179117	-0.325281	0.42658	0.200855	-0.399935	-0.123918	-0.805191	-0.0871875	0.119215	-1.46471	-0.537713	0.911004	-1.23091	1.00654	-0.168912	2.27786	0	0.528211	-0.225215	0.0230103	0.166011
BLCA	TCGA-CU-A3QU	TCGA-CU-A3QU-01A-11R-A22U-07	-2.59396	-2.52968	0.00392612	-0.758546	1.16936	-1.41162	-0.986398	0.289011	2.03307	2.98979	-2.11191	-0.318209	0.147291	-0.773052	0.058878	-1.47847	0.845529	1.31554	-1.27824	-0.445088	0.102745	-0.177644	0.516199	-0.391369	0.796927	-0.912934	-0.414994	-0.103006	-0.850914	-0.0111703	-1.81659	0.583692	1.14414	-0.960715	-0.672889	0.30592	-0.0582139	0.242193	-0.646488	0.688307	-0.168912	-0.236886	0.154362	1.16936	-1.6115	-1.15543	-1.36859
BLCA	TCGA-CU-A3YL	TCGA-CU-A3YL-01A-11R-A22U-07	0.249798	-0.0580627	-0.373112	-1.57482	-0.868286	0.179473	0.564768	-1.09032	-0.678239	-1.17055	-0.532875	-0.136368	0.108505	0.22172	-0.0290386	0.279591	-0.500613	1.09923	-0.978227	-0.571536	-0.0772719	-1.53855	-1.09112	-0.309545	-0.961567	-0.0998503	-0.23372	-0.164051	0.422347	-0.142404	0.671876	-1.01313	0.526148	-0.550095	-0.421465	0.0933194	-1.97095	-1.50644	-0.529274	-1.53636	-0.168912	-0.240898	0	-0.868286	0.357498	-0.223033	-0.936743
BLCA	TCGA-CU-A5W6	TCGA-CU-A5W6-01A-11R-A28M-07	-2.72052	-0.839342	-1.83386	1.37374	-0.276555	-0.549346	-0.314802	-1.00468	-1.13186	-1.03092	-0.864625	0.172974	0.426659	0.0161834	0.115724	-0.0390774	0.56884	1.2333	0.207444	1.33368	0.918841	0.787599	0.818813	1.3297	0.477415	-0.301873	0.162081	0.239721	0.0859079	0.0429788	0.0607831	0.33182	0.885463	0.917643	1.68207	1.53795	1.27702	0.81289	1.47267	0.280938	-0.168912	0.717752	0	-0.276555	-0.466769	-0.29272	-0.343337
BLCA	TCGA-CU-A72E	TCGA-CU-A72E-01A-12R-A33J-07	-0.100086	0.712469	0.0772516	1.23327	-0.788609	0.079266	0.314535	-1.92612	-1.38618	-1.53614	-0.00180366	0.227476	0.282494	0.247428	0.109213	0.276616	0.382193	1.53857	0.504569	1.20976	0.342544	0.571969	2.27098	1.1995	0.0722662	0.139976	0.243204	0.113122	0.360902	0.035149	0.447955	0.057176	1.25331	1.23092	1.90675	0.786898	0.952743	2.34859	1.35307	-0.363043	0.0607028	1.63307	0.955714	-0.788609	-0.645684	-0.220753	-0.375193
BLCA	TCGA-DK-A1A3	TCGA-DK-A1A3-01A-11R-A13Y-07	-0.656749	-1.24656	-0.385486	-0.388683	-0.101576	0.219014	0.838021	-0.72534	-1.17683	-0.0326256	-0.211928	0.0548326	-0.122098	-0.422366	0.0121087	-0.0678816	0.11905	1.13703	-0.0179474	-0.257562	-0.28472	-0.407461	0.171213	-0.0441376	0.844322	0.0608734	-0.00125873	-0.382475	-0.459219	-0.0968788	0.0447153	-0.273164	0.358832	0.621135	-0.450944	-0.299869	-0.366563	-0.287046	-0.291255	0.6154	1.68235	-0.138627	0	-0.101576	0.437239	0.0827209	0.506299
BLCA	TCGA-DK-A1A5	TCGA-DK-A1A5-01A-11R-A13Y-07	0.447699	-0.821849	0.421266	0.806665	0.49946	0.578059	0.893518	-0.667406	-0.804783	-0.123977	0.749478	0.212727	0.192078	0.0125098	0.197962	0.0543753	-0.586647	0.888668	-0.248634	-0.479719	-0.175051	-0.278363	0.308786	-0.487115	1.10344	0.475208	0.171751	-0.00188083	0.051461	0.15236	0.195913	-1.25363	-0.269069	0.275597	-0.66252	-0.204105	-0.293269	0.0297536	-0.820729	0.899848	-0.168912	0.713342	0	0.49946	-0.0822039	-0.623399	0.474624
BLCA	TCGA-DK-A1A6	TCGA-DK-A1A6-01A-11R-A13Y-07	-1.87867	-0.582109	0.816576	0.165454	0.85176	-0.2741	-0.691521	-0.820356	-0.739813	-1.44645	-0.886635	-0.141777	0.0296481	-0.978273	0.124987	-1.1011	0.885334	1.14767	-1.75921	-1.52899	-0.0460779	-0.71291	-0.0915107	0.287273	1.6759	-0.320219	-0.262238	-0.233315	-1.17837	0.0845002	-1.40222	0.840542	0.753392	-1.55931	-1.80123	-0.140064	-0.794824	-0.270509	0.174998	1.89729	-0.168912	-0.461701	0	0.85176	0.95061	0.19237	0.304328
BLCA	TCGA-DK-A1A7	TCGA-DK-A1A7-01A-11R-A13Y-07	0.381528	0.00130292	0.0852034	-0.616784	-0.551255	-0.0430716	0.420749	NA	NA	NA	0.0213087	-0.149151	0.372496	0.223424	0.104618	0.571807	0.53167	1.11409	-0.252722	0.152365	0.675505	0.134013	-0.156431	1.6746	0.236301	0.219385	-0.246415	0.113349	0.363556	0.0318934	0.964275	0.44513	0.247287	0.421405	0.196902	1.05601	0.305695	-0.28541	1.96594	0.0279414	2.39624	1.59794	0	-0.551255	0.283487	0.213625	-0.569613
BLCA	TCGA-DK-A1AA	TCGA-DK-A1AA-01A-11R-A13Y-07	0.833066	0.089144	-1.56973	0.821842	-0.630108	-0.566035	-0.334396	-0.569836	-0.244174	-0.416056	-0.984501	0.111923	0.552662	-0.0383986	-0.104245	-0.273109	0.855874	1.78249	-0.800034	-0.286939	-0.413186	-0.139653	0.0641423	-0.0327127	0.265883	-0.326174	0.0791841	0.37907	0.0298228	-0.269759	-0.172886	0.50676	2.02749	-0.304143	-0.342266	-0.452283	-0.100756	-0.170064	-0.265203	-0.180422	-0.168912	-0.23711	0	-0.630108	-0.949899	-0.0732188	-0.824247
BLCA	TCGA-DK-A1AB	TCGA-DK-A1AB-01A-11R-A13Y-07	-1.88873	0.598651	0.733334	1.01096	0.660422	0.756374	1.58094	1.01544	-0.800744	-0.247829	1.08886	0.472098	0.0549305	0.51437	0.093789	1.04677	-0.421103	0.573576	0.683143	0.95698	-0.100686	-0.179378	1.12169	-0.630391	-0.191709	0.641976	0.494883	-0.183063	0.677808	-0.0149744	1.54803	-0.887262	-0.75804	1.43263	1.35459	0.118961	-0.141441	1.23841	-1.01318	-0.587082	-0.168912	-0.461701	0.601443	0.660422	0.500897	0.286375	0.624629
BLCA	TCGA-DK-A1AC	TCGA-DK-A1AC-01A-11R-A13Y-07	1.53088	-1.78169	1.32344	0.472531	2.25917	-0.0891045	0.137718	-1.55432	-1.06371	-0.944857	-0.0318592	0.0328194	0.0577668	-0.920747	0.346227	-0.28727	0.977692	0.487948	-0.0851806	-0.376456	0.645719	0.581438	0.656951	0.33521	2.01235	0.0982902	-0.0743552	-0.229032	-1.09609	0.3449	-0.410912	0.86739	-0.708198	0.409545	-0.54626	1.17585	0.96767	0.67689	0.165747	2.01896	0.166175	-0.461701	0.29681	2.25917	0.920282	0.736224	0.35361
BLCA	TCGA-DK-A1AD	TCGA-DK-A1AD-01A-11R-A13Y-07	0.713474	0.359567	-0.665157	-0.0933096	-0.852635	-0.356392	0.203101	-0.554553	-0.289889	0.174652	-0.91359	-0.402708	0.0300945	-0.199793	0.100301	0.217123	0.555299	1.05774	-0.126147	0.209152	0.88911	0.0801742	-0.226036	0.345679	1.02347	-0.30701	-0.577617	-0.245204	-0.213196	0.0392041	0.359727	0.349869	0.121208	0.407559	-0.0279241	1.41437	0.206649	-0.624122	0.200767	0.903348	1.78471	0.127408	3.01117	-0.852635	-0.198001	1.11487	-0.337201
BLCA	TCGA-DK-A1AE	TCGA-DK-A1AE-01A-11R-A13Y-07	1.39795	1.04987	0.751732	0.65096	0.269681	-1.0004	1.13152	-1.5824	-1.4521	-1.68431	-0.642791	-0.00690322	0.365041	0.0632063	0.367192	0.390859	1.96968	-0.490168	1.05294	0.930392	0.708131	0.672225	1.64905	0.580598	2.40885	-0.150102	-0.0481635	0.184037	0.0844267	0.375119	0.706989	1.91178	-2.12055	1.82659	1.21083	1.21162	1.12465	1.70719	0.510075	2.24133	-0.168912	0.961221	0	0.269681	-0.390488	0.440147	-0.321584
BLCA	TCGA-DK-A1AF	TCGA-DK-A1AF-01A-11R-A13Y-07	-0.0972133	0.294252	0.420526	1.74081	0.764138	1.52848	1.6654	-0.134165	-0.506486	0.529593	1.40917	0.509911	0.246977	0.304078	0.0505028	0.686699	-1.4946	0.848509	0.824031	0.00111924	0.215995	-0.319609	-0.20462	-0.428061	-0.395824	0.842012	0.51206	0.0237829	0.43228	-0.055297	1.09114	-1.97244	-0.61854	1.62045	0.0362662	0.407694	-0.258941	-0.607239	-0.73497	-0.797738	-0.0645425	-0.461701	0	0.764138	0.901535	0.825468	0.778605
BLCA	TCGA-DK-A1AG	TCGA-DK-A1AG-01A-11R-A13Y-07	0.670714	-0.0723383	-1.08868	0.222213	-1.11663	-0.978794	-0.599073	0.401129	0.0847973	0.121392	-0.925216	0.027746	0.372182	0.014348	-0.105919	-0.40635	0.633434	1.57574	-1.16776	-0.144319	-0.378863	-1.04998	0.238108	0.0518867	-0.734323	-0.282368	0.00328023	0.194213	0.093179	-0.256828	-0.269304	0.307456	1.58837	-0.768115	-0.0115232	-0.358852	-1.32818	0.0154361	-0.125526	-1.4223	-0.168912	0.797728	0	-1.11663	0.0706859	-0.376511	-1.24393
BLCA	TCGA-DK-A2HX	TCGA-DK-A2HX-01A-12R-A18C-07	-0.754004	-1.37268	-0.525262	-0.187362	-0.41056	0.880435	1.76801	-1.16642	-2.2433	-1.38888	0.656324	0.115401	0.896187	0.109261	-0.0327273	0.337194	-1.65392	0.866341	0.15981	-0.497582	-0.536476	-0.481032	-0.657242	-0.798478	-0.281046	0.490295	0.0309217	0.772031	0.16712	-0.181724	0.630695	-2.11835	-0.0821157	0.807817	-0.729679	-0.759636	-0.4708	-0.997525	-1.16557	-0.776306	-0.0590746	-0.461701	0	-0.41056	-0.516449	-0.391422	0.118884
BLCA	TCGA-DK-A2I1	TCGA-DK-A2I1-01A-11R-A180-07	-1.73511	-0.852708	-0.109916	-0.721741	-0.650516	1.02889	0.997981	-0.480129	-0.0903264	-0.336349	0.716997	0.14677	0.147479	-0.121446	-0.00775696	0.255744	0.131845	0.734361	0.0841195	0.345483	0.763128	0.161839	-0.115524	1.37934	-0.0970122	0.479043	0.0735842	-0.120738	-0.0590602	-0.114933	0.380129	-0.18112	-0.529305	0.655741	0.447687	1.26946	0.379029	-0.389858	1.60534	-0.345522	-0.168912	-0.461701	0	-0.650516	0.625032	1.13592	0.558037
BLCA	TCGA-DK-A2I2	TCGA-DK-A2I2-01A-11R-A180-07	0.0222911	1.07424	-0.612443	0.771673	0.719848	0.573872	0.277652	-1.03082	-1.09505	-1.08259	0.959973	0.293636	0.202504	0.285047	0.0237147	-0.263121	0.386956	0.12793	-0.239166	-0.281944	-0.654676	-0.0342051	0.232512	0.906346	0.660654	0.644286	0.294241	-0.0180781	0.379684	-0.0801512	-0.283572	-0.0523354	-1.53686	0.366454	-0.321082	-0.854653	0.0527608	0.0143853	0.919642	0.541863	1.92336	2.07097	2.2873	0.719848	0.101606	0.165784	1.07016
BLCA	TCGA-DK-A2I4	TCGA-DK-A2I4-01A-11R-A21D-07	-0.156029	-0.396588	1.14382	1.77691	2.57354	1.05893	1.04482	-1.06627	-0.878748	0.149666	1.14587	0.458948	1.02214	-0.117305	0.199468	-0.0994102	-1.49856	0.623765	0.286652	-0.257059	-0.548612	-0.671157	-0.127051	-0.644266	-0.161726	0.723571	0.457222	0.906846	-0.121113	0.148379	-0.0179095	-2.07447	-0.862008	0.94375	-0.385643	-0.646821	-0.763498	-0.513333	-0.970744	-0.42903	-0.0652424	-0.461701	0.151511	2.57354	1.67603	1.9618	2.19148
BLCA	TCGA-DK-A2I6	TCGA-DK-A2I6-01A-12R-A18C-07	-1.71234	1.03424	1.43417	-1.24627	1.76357	-0.639132	-1.22058	NA	NA	NA	-0.449592	-0.0770309	-0.224617	-0.0375646	0.11377	-0.391551	1.42411	0.379346	-1.82592	-0.381446	-0.0640362	1.05803	0.871468	0.312977	0.58964	-0.079376	-0.148365	-0.526879	0.00820788	0.0779892	-0.387532	1.31548	-0.910783	-1.51873	-0.362307	-0.173367	1.67029	0.682478	0.168309	0.545708	1.17255	1.86684	0	1.76357	-0.505171	-1.12626	1.12284
BLCA	TCGA-DK-A3IK	TCGA-DK-A3IK-01A-32R-A21D-07	0.828799	-0.922881	-1.53645	-0.576419	-0.569405	0.140225	0.29751	-1.27875	-1.24263	-0.835879	0.300733	-0.0660507	0.214344	-0.00572676	-0.0281419	0.695655	-0.353136	1.15689	-0.0105973	0.102146	0.520338	-0.357014	0.00607535	0.337375	-0.388539	0.277232	-0.172207	0.0027819	0.068754	-0.182987	1.0845	-0.894385	0.457679	0.583514	0.146464	1.03006	-0.314631	-0.249644	0.260779	-0.927404	1.891	0.695983	3.30399	-0.569405	-0.38289	0.181226	-0.395936
BLCA	TCGA-DK-A3IL	TCGA-DK-A3IL-01A-11R-A20F-07	0.699089	-1.83921	0.306895	-0.797238	-0.67812	-0.426498	0.599448	-0.0146301	-0.66675	-0.257473	-0.545185	-0.161736	-0.144141	-0.0613353	0.0341055	-0.450525	0.277802	1.29181	-0.965384	0.00764493	0.529092	-0.257598	0.778268	-0.00860592	-0.110201	-0.135783	-0.29653	-0.390238	-0.0519524	-0.0485754	-0.478047	-0.0350134	0.780652	-0.619072	0.0576933	0.765839	-0.175265	0.73651	-0.19397	-0.47847	-0.168912	-0.230383	0	-0.67812	-0.568973	-0.449374	-0.942503
BLCA	TCGA-DK-A3IM	TCGA-DK-A3IM-01A-11R-A20F-07	0.563672	2.02447	0.99522	0.767544	-0.392134	-0.653011	-1.70395	-1.4952	-2.14635	-0.316587	0.0287519	0.210015	-0.0529803	0.189195	0.333059	0.218022	2.02914	0.429416	-0.782801	-0.285761	-0.997753	-0.160927	1.14051	0.0997881	1.73961	0.0770764	0.1923	-0.272459	0.196184	0.348845	0.483055	1.99755	-0.717355	-0.339307	-0.181507	-1.57339	-0.0223676	1.29912	-0.0886909	1.71379	-0.168912	2.51091	0	-0.392134	-1.16627	-1.34292	-0.285016
BLCA	TCGA-DK-A3IN	TCGA-DK-A3IN-01A-11R-A20F-07	0.74635	1.18756	0.619232	0.864201	1.2824	1.49108	0.225221	0.0995941	0.86	1.35475	1.23847	0.139784	0.104101	0.230458	0.204498	0.412784	0.207238	0.585671	0.242725	-0.088345	-0.441287	-0.150683	1.52553	-0.471142	0.390168	0.789594	0.0656269	-0.120082	0.334805	0.161172	0.67758	-0.342346	-1.06348	0.867905	-0.251645	-0.70277	-0.100246	1.60547	-0.846402	0.152833	1.95834	1.47059	2.82784	1.2824	0.627045	0.268729	1.07518
BLCA	TCGA-DK-A3IQ	TCGA-DK-A3IQ-01A-31R-A32Y-07	-0.593905	-1.15161	-0.915128	0.108564	-0.657898	2.04459	2.72618	0.45097	0.789346	1.83135	1.97186	0.237826	-0.0793674	0.323089	-0.16547	1.05381	-2.50638	-0.651064	0.434451	-0.309553	-0.440283	-1.10159	-0.535764	-0.77301	-1.18649	1.18523	0.172296	-0.354255	0.465228	-0.36761	1.55787	-2.75862	-2.35845	1.11031	-0.467947	-0.668124	-1.40656	-0.96839	-1.13178	-1.62819	-0.010475	-0.322709	0	-0.657898	-1.1069	-0.934227	0.254911
BLCA	TCGA-DK-A3IS	TCGA-DK-A3IS-01A-21R-A21D-07	-3.02709	-0.291946	-0.351418	-1.46189	-0.677268	-0.899394	-0.994987	NA	NA	NA	-1.29775	-0.181854	0.0212187	-0.490081	0.188102	-0.388507	0.774906	1.45292	-1.30302	0.0883247	0.197804	0.0666147	0.424094	0.804886	0.992042	-0.494052	-0.249954	-0.223029	-0.467807	0.170398	-0.245272	0.677873	1.49167	-0.912562	0.31602	0.335575	0.184288	0.22782	0.79709	1.08055	1.77266	1.64377	0	-0.677268	0.0820589	-0.762614	-1.45519
BLCA	TCGA-DK-A3IT	TCGA-DK-A3IT-01A-31R-A20F-07	-0.314395	0.231687	1.48648	0.0821004	-1.14927	0.0826025	1.04354	-1.01486	-0.840296	-0.4515	0.052403	0.133983	0.399635	0.122884	0.224983	-0.374284	0.318594	0.759557	-0.114237	-0.0241739	0.275117	0.693275	-0.103096	0.290295	1.04922	0.213742	0.0829029	0.20086	0.180967	0.214875	-0.372487	-0.0129012	-0.479246	0.388511	0.158455	0.467507	1.15266	-0.444936	0.192746	0.992257	-0.168912	-0.461701	0.185926	-1.14927	0.0702809	0.167676	-0.357322
BLCA	TCGA-DK-A3IU	TCGA-DK-A3IU-01A-11R-A20F-07	0.665299	0.597214	0.046171	1.10841	2.29958	1.07126	1.45629	-0.140548	0.688841	-0.708089	1.21807	0.431317	0.125509	-0.434328	0.102332	0.534797	-0.913452	0.211376	-0.151497	-0.104813	-0.446518	-0.224283	-0.119889	-0.321541	-0.347493	0.751467	0.366614	-0.123852	-0.594195	0.0069891	0.740302	-1.37367	-1.34491	0.425165	-0.0303221	-0.532826	-0.156122	-0.534579	-0.618371	-0.664927	-0.168912	0.60115	0.182102	2.29958	2.36934	1.80258	1.78067
BLCA	TCGA-DK-A3IV	TCGA-DK-A3IV-01A-22R-A21D-07	-0.103123	-2.0796	0.504759	-0.186705	0.917901	-0.812173	-0.565944	-0.315374	0.521072	1.46512	-1.89205	-0.273944	0.283604	-0.370286	0.357538	-0.279522	-0.0230045	1.62447	-0.0811745	-0.223683	-0.362154	-0.840323	0.128128	-0.973334	0.44086	-0.814159	-0.404333	0.0598582	-0.489104	0.339919	-0.126131	-0.415618	1.50779	0.576169	-0.134091	-0.440342	-0.987529	-0.0154452	-1.42554	0.0933549	0.00681302	-0.461701	0	0.917901	0.715273	1.41615	0.0685837
BLCA	TCGA-DK-A3WW	TCGA-DK-A3WW-01A-22R-A23N-07	-0.600916	1.95572	0.0625043	0.947539	3.16454	0.249656	-0.331198	-0.70715	-1.58175	-0.0270295	-0.43419	0.311467	0.490695	-0.197258	0.0705872	-1.65794	1.36686	0.321777	-1.40057	0.696381	-0.538898	0.478182	0.294676	0.635551	0.836168	-0.0923898	0.317541	0.337557	-0.268501	0.00112343	-2.2298	1.39904	-0.808504	-1.06604	0.729707	-0.754645	0.597408	0.0685102	0.626989	0.906206	0.169825	1.74764	0	3.16454	1.25505	1.5969	1.65551
BLCA	TCGA-DK-A3WX	TCGA-DK-A3WX-01A-22R-A22U-07	-0.924	0.309352	0.799546	2.21826	0.936953	0.347821	0.67241	-0.759074	3.09984	1.62206	0.889449	0.164604	-0.0494803	0.452019	0.240089	0.226595	0.637777	0.0681766	-0.687434	-0.51026	-0.860742	0.190998	-0.578325	-0.898076	0.67816	0.523711	0.135863	-0.309287	0.609501	0.211399	0.446204	0.222153	-1.40624	-0.123703	-0.646671	-1.31201	0.247143	-1.12597	-1.33944	0.553642	1.06469	0.902806	1.75542	0.936953	0.744694	0.965578	0.772893
BLCA	TCGA-DK-A3WY	TCGA-DK-A3WY-01A-11R-A22U-07	0.66634	0.143235	1.17771	0.301114	0.823507	1.50412	1.49343	-1.48885	-1.53208	-0.226455	1.05669	0.0346651	0.242037	-0.123107	0.344417	0.0392907	0.29437	-0.812024	-0.0746098	-0.0642772	-0.266546	0.00851185	0.901332	0.206052	0.0914252	0.749678	-0.0634005	-0.0245546	-0.188682	0.339604	0.068052	-0.0207221	-2.31608	0.533173	-0.149387	-0.195071	0.289617	0.639045	0.131772	-0.0272409	2.27149	1.15066	0.832053	0.823507	2.76944	2.28453	1.30344
BLCA	TCGA-DK-A3X1	TCGA-DK-A3X1-01A-12R-A22U-07	0.204276	-0.717211	-0.220424	-0.339286	-0.438277	0.140826	0.305149	-1.6232	-0.433149	-1.63163	0.338914	-0.0655008	0.268212	-0.0533852	0.0590005	-0.148453	0.0821092	1.19266	-0.5638	-0.390797	0.00832565	-0.603908	0.563716	0.922216	0.446346	0.297372	-0.147487	0.0250658	0.0132612	-0.00487628	-0.160854	-0.281065	0.689578	-0.103754	-0.413255	0.208185	-0.719942	0.386426	0.955939	0.45189	0.838638	2.30628	3.5446	-0.438277	-0.386017	-0.127668	-0.440031
BLCA	TCGA-DK-A3X2	TCGA-DK-A3X2-01A-11R-A22U-07	0.13324	0.920589	1.60812	-0.245281	-0.0609292	-1.1566	-1.40183	-1.89722	-1.93446	-1.9884	-1.60491	-0.142719	0.0431821	-0.0698053	0.371411	-0.363829	2.14058	0.515746	-1.41671	0.519511	-0.459683	1.89406	0.95054	0.765909	1.57465	-0.70656	-0.198775	-0.152116	-0.0734027	0.410724	-0.336038	2.13166	-0.683235	-1.01837	1.09265	-0.412607	2.90445	1.02542	0.816939	1.48117	1.14468	1.09382	0	-0.0609292	-1.26327	-2.17432	-1.13996
BLCA	TCGA-DK-A6AV	TCGA-DK-A6AV-01A-12R-A30C-07	0.266017	0.229925	0.593309	-0.315799	-0.98056	-0.319442	-0.446534	NA	NA	NA	-0.740885	0.12335	0.188123	-0.0822229	0.0526708	-0.132092	1.19786	1.34026	-1.24347	-0.19712	-0.15437	-0.200736	1.40277	0.405593	0.994261	-0.270046	0.0823568	-0.0466393	-0.0140304	0.00251069	0.0786787	1.25518	1.13357	-0.790265	0.193585	-0.120726	0.0169658	1.58749	0.339031	1.05925	0.37747	-0.186837	0	-0.98056	0.139062	-0.265104	-0.242231
BLCA	TCGA-DK-A6AW	TCGA-DK-A6AW-01A-11R-A30C-07	-0.913273	-0.288312	-0.756609	-1.3792	0.315252	0.465713	-0.371253	-0.00300486	0.0815889	0.334878	-0.501086	0.160236	0.367183	-0.135281	-0.193685	-1.11278	0.419165	1.15157	-1.49365	0.0382542	0.12741	0.567377	-0.207268	1.5796	-0.101939	-0.0983958	0.162037	0.15784	-0.0038544	-0.362957	-1.29568	0.128401	0.636019	-1.15588	0.33519	0.30251	1.13179	-0.407813	1.94244	-0.521655	-0.168912	-0.461701	0	0.315252	-0.099729	-0.193106	-0.794501
BLCA	TCGA-DK-A6B0	TCGA-DK-A6B0-01A-11R-A31N-07	0.963513	-0.03641	-2.22346	-0.732512	-0.972378	-0.856494	-1.47213	0.597546	0.7979	0.337865	-1.36565	0.0713426	0.396319	-0.344042	-0.289302	-1.0615	0.847495	1.87952	-1.90564	-0.0519548	-0.204206	0.283014	0.610317	1.02761	-0.529456	-0.469773	0.0209682	0.225889	-0.330689	-0.509939	-1.30928	0.613154	2.41062	-1.62513	0.0174563	-0.20884	0.581946	0.545279	1.12025	-1.11809	-0.168912	-0.461701	0	-0.972378	-1.13826	-1.03026	-1.98941
BLCA	TCGA-DK-A6B1	TCGA-DK-A6B1-01A-12R-A30C-07	0.444275	-1.92939	-1.55158	-0.407958	-0.435879	0.143551	-0.0406564	0.260419	1.22564	-0.263195	-0.979302	-0.250702	0.484053	-0.360901	0.144356	-0.67929	0.366942	1.05329	-0.516719	-0.368333	1.31673	0.379853	-0.310146	0.333429	0.586292	-0.388013	-0.368657	0.248435	-0.31333	0.0744687	-0.684324	-0.0581504	0.277672	0.0563647	-0.119488	2.31314	0.735546	-0.659846	0.238158	0.325728	1.9932	0.529824	3.1243	-0.435879	-1.49322	-0.747543	-0.778478
BLCA	TCGA-DK-A6B2	TCGA-DK-A6B2-01A-11R-A30C-07	0.896295	-0.707709	0.128195	-0.415675	0.220157	0.587771	0.757256	-0.524838	-1.26212	-0.197561	0.260661	0.0469741	0.285733	0.141252	0.0580275	0.507164	-0.638395	0.909456	0.280796	-0.316313	0.406658	-0.38481	-0.0707898	-0.396426	-0.16033	0.268249	-0.0416763	0.0243942	0.226816	-0.0327437	0.848393	-1.23855	-0.269883	0.931255	-0.385479	0.791676	-0.3566	-0.471158	-0.719643	-0.572092	2.0594	-0.461701	0.195669	0.220157	0.323613	0.743946	0.429542
BLCA	TCGA-DK-A6B5	TCGA-DK-A6B5-01A-11R-A31N-07	-2.89858	-0.42439	0.305446	-0.995117	0.0127676	-0.513933	-0.795667	-1.26069	-1.01495	-0.765993	-0.137024	-0.0572208	0.254475	0.174296	0.087614	0.445965	-0.141361	0.920251	-0.377082	0.161896	0.317971	-0.603637	1.22256	-0.293881	-0.243567	0.03794	-0.138672	0.0259255	0.193289	0.00410997	0.724012	-0.603731	0.155583	0.174248	0.205764	0.925247	-0.651734	1.12096	-0.558225	-0.579497	0.0287808	1.94239	0.162913	0.0127676	0.271285	-0.280572	-0.0590548
BLCA	TCGA-DK-A6B6	TCGA-DK-A6B6-01A-11R-A30C-07	-2.36092	-1.59558	-1.8354	-0.39247	0.337692	-1.12654	0.47826	0.532371	0.194053	0.380145	-1.61118	-0.527297	0.135358	-0.560173	-0.119954	-0.438783	0.83919	1.57558	-0.959982	-0.660244	0.4321	0.295897	-0.235808	-0.0061458	-0.0315193	-0.658303	-0.679385	-0.104407	-0.678067	-0.283745	-0.489466	0.653203	1.40703	-0.595426	-0.744198	0.906252	0.598466	-0.545317	-0.164711	-0.329424	-0.168912	-0.461701	0	0.337692	0.847544	1.24006	-0.428725
BLCA	TCGA-DK-AA6L	TCGA-DK-AA6L-01A-11R-A39I-07	-1.21841	-0.25104	-0.611291	-1.20139	-0.0617134	-0.246517	-1.48112	-0.997046	-0.167795	0.405764	-0.475256	0.0251344	0.258407	0.168932	-0.00117542	-0.59567	0.438349	1.44933	-1.20803	-0.364873	-1.12086	-0.916998	0.912534	-0.436141	0.0149088	-0.102358	-0.0355051	0.0870565	0.248845	-0.112898	-0.714147	-0.0949402	1.27719	-0.792291	-0.443186	-1.42673	-1.21604	0.545705	-0.749447	-0.324067	0.10437	-0.461701	0	-0.0617134	0.289306	-0.30223	-0.556132
BLCA	TCGA-DK-AA6M	TCGA-DK-AA6M-01A-11R-A39I-07	0.555854	1.14236	-0.0827738	0.0770563	0.629418	-0.00889321	-0.537464	-0.728596	0.446162	1.08136	0.366034	0.0846721	0.160511	0.0723669	0.113067	-0.0639566	0.325129	0.693528	-0.885301	-0.855247	-0.893303	-0.406806	-0.358707	0.568677	-0.248904	0.31562	-0.0176259	-0.0227144	0.0761895	0.0396708	0.0750171	-0.108705	-0.767355	-0.405976	-1.25687	-1.30678	-0.353784	-0.857711	0.581547	-0.44328	-0.168912	-0.461701	0.288356	0.629418	0.785784	1.43974	0.725821
BLCA	TCGA-DK-AA6P	TCGA-DK-AA6P-01A-11R-A39I-07	0.445157	0.73579	-0.00807509	-0.889338	-1.54232	-1.05242	0.629491	-0.187194	-0.316554	-0.303176	-0.636296	-0.360679	0.114238	-0.263781	0.0695598	0.0902687	0.986821	0.979568	-0.456092	0.843252	0.790074	0.465859	1.56339	0.061464	0.53046	-0.137652	-0.462097	-0.167233	-0.254892	-0.0193051	0.395917	0.774902	0.286409	0.104025	1.57675	1.4603	0.804816	1.83479	-0.178337	0.234962	0.00214163	-0.461701	3.40673	-1.54232	-1.76419	-0.792244	-1.28655
BLCA	TCGA-DK-AA6Q	TCGA-DK-AA6Q-01A-11R-A39I-07	-0.234325	0.39197	-0.0237804	0.844834	0.571484	-1.07974	-0.141365	-0.882061	-0.728357	-0.672485	-0.22424	-0.0871083	-0.0129726	0.303765	0.0427222	0.487349	1.14381	-0.119738	0.405329	-0.122018	-0.553091	-0.204496	1.26344	0.289038	0.561057	0.00693864	-0.13874	-0.271387	0.420759	-0.0341869	0.858549	0.958052	-1.59098	1.06622	-0.0177316	-0.568833	-0.140054	1.13046	0.193068	0.366318	0.115143	-0.461701	0	0.571484	1.55026	0.815324	0.39172
BLCA	TCGA-DK-AA6R	TCGA-DK-AA6R-01A-11R-A42T-07	-1.42182	1.06414	1.03279	1.14399	1.92114	-0.0048593	-0.297319	-1.59091	0.318417	-0.332648	-0.171567	0.180965	-0.127843	-0.0318603	0.153353	-0.525517	0.579165	0.996127	-1.04853	-0.561304	-1.12603	-0.00596022	0.0177408	-0.107175	1.16403	0.0332372	0.148888	-0.354225	-0.0343853	0.125907	-0.620991	0.242271	0.358402	-0.599206	-0.547081	-1.61151	0.218422	-0.264653	-0.348315	1.14183	-0.168912	1.8698	1.20561	1.92114	-0.119007	-0.167299	0.887343
BLCA	TCGA-DK-AA6S	TCGA-DK-AA6S-01A-21R-A39I-07	-0.173852	-1.59657	-0.680971	-0.101663	0.288465	0.869496	1.31261	-1.58812	-0.67892	-0.512272	1.20085	0.0438298	0.289574	0.370279	0.0713173	0.998865	-1.81657	0.251768	0.223754	-0.537242	-0.828247	-1.04336	0.0788349	-0.449901	-0.480667	0.74561	-0.0378839	0.100054	0.520741	-0.0496986	1.58732	-2.32605	-1.40439	0.876413	-0.804853	-1.21569	-1.31027	-0.144083	-0.777951	-0.977926	0.0162006	-0.190335	1.88329	0.288465	0.970799	0.747154	0.898954
BLCA	TCGA-DK-AA6T	TCGA-DK-AA6T-01A-11R-A39I-07	0.413494	0.06348	1.38901	-0.258602	0.320536	1.10653	0.595354	NA	NA	NA	-0.462741	-0.293988	0.252003	-0.546854	0.333157	-0.963541	1.12666	-0.512164	-1.67999	-0.0970556	0.0114695	0.487085	0.781327	1.16482	0.724313	0.0532516	-0.457534	-0.040115	-0.758719	0.330434	-1.32299	0.942663	-1.99118	-1.44496	-0.165767	0.116458	0.984452	0.634972	1.35156	0.787341	0.216321	-0.461701	0	0.320536	1.09518	0.597152	0.207406
BLCA	TCGA-DK-AA6U	TCGA-DK-AA6U-01A-11R-A39I-07	0.34099	0.135986	0.176471	-0.400307	-0.0116373	-1.68646	-0.951896	NA	NA	NA	-1.44361	-0.472992	-0.175438	-0.347955	0.242882	-0.0157429	1.08134	1.34692	-0.46407	-0.10063	0.380725	0.0137823	-0.222336	0.0451141	1.08215	-0.574445	-0.577869	-0.458359	-0.373389	0.234271	0.166866	0.995359	0.824437	0.140302	-0.0145035	0.778526	0.130098	-0.572506	-0.185202	1.113	1.60212	1.72305	2.83653	-0.0116373	-0.559473	0.131349	-1.1326
BLCA	TCGA-DK-AA6W	TCGA-DK-AA6W-01A-12R-A39I-07	-2.20887	0.525657	0.979	-0.491958	-0.480304	0.352513	-0.69877	NA	NA	NA	-0.16028	-0.179937	-0.299185	0.045219	0.429078	1.30669	1.43389	-0.514418	0.0895101	-0.585703	-0.318356	-0.36826	-0.320662	-0.0523978	1.09928	0.00280049	-0.300424	-0.633012	0.12885	0.458443	2.13298	1.1571	-2.20885	0.952272	-0.573958	-0.172408	-0.217629	-0.666109	-0.230548	0.843129	2.94164	0.291444	2.42104	-0.480304	0.0112946	0.0835158	-0.375425
BLCA	TCGA-DK-AA6X	TCGA-DK-AA6X-01A-12R-A42T-07	-0.769635	-1.83737	-0.204919	0.643784	-0.305766	0.0670624	0.378613	NA	NA	NA	-0.408151	-0.13707	0.211912	0.0235717	0.204659	0.146807	-0.223977	0.934774	0.816429	1.09161	0.781475	0.513859	0.29832	0.534683	0.27687	-0.0557747	-0.243589	-0.0470907	0.0613994	0.141357	0.332007	-0.579176	-0.469236	1.61099	1.62937	1.47117	0.958847	0.237141	0.502527	-0.111977	0.192337	0.0152863	0.32407	-0.305766	-0.0494459	0.374039	0.0856005
BLCA	TCGA-DK-AA71	TCGA-DK-AA71-01A-31R-A39I-07	0.527147	-1.72357	-0.267144	-0.480465	-0.590521	-0.807894	-1.18562	NA	NA	NA	-0.946623	0.12564	0.400734	0.165255	0.0109659	-0.39896	0.934524	1.64703	-0.581566	0.486606	0.786377	0.762662	1.06867	1.26511	-0.128553	-0.3093	0.112616	0.21111	0.272426	-0.0741012	-0.409245	0.956597	1.70379	-0.0463256	0.734732	1.29332	1.24609	0.990565	1.41348	-0.508471	0.0159881	1.52545	0	-0.590521	-0.0288773	-0.0554327	-0.814124
BLCA	TCGA-DK-AA74	TCGA-DK-AA74-01A-11R-A39I-07	-1.1032	0.0966398	-0.0593542	0.876995	0.526698	1.32931	0.650493	-1.15255	-0.889328	-0.611323	1.85142	0.523997	0.162378	0.40495	-0.169137	0.275438	-0.765282	-0.163977	-0.635173	0.467316	0.023337	-0.500787	0.144335	1.14831	-1.35808	1.10179	0.509343	-0.0218415	0.544672	-0.308267	0.467086	-1.15289	-1.7503	-0.0881816	0.672454	0.31355	-0.437413	-0.268983	1.32101	-1.57598	-0.168912	2.12766	0	0.526698	1.4857	1.55844	1.13542
BLCA	TCGA-DK-AA75	TCGA-DK-AA75-01A-11R-A39I-07	1.23707	-0.598092	-0.209939	-1.44837	-0.406031	-0.978603	-1.2827	-0.645513	-0.0946852	-0.487819	-1.50589	-0.345677	0.0505371	-0.25602	0.0314224	-0.310988	1.49311	1.02404	-1.5263	-0.446718	0.158097	-0.0366	1.06436	1.72935	0.519311	-0.616039	-0.485474	-0.27872	-0.193752	-0.0203254	-0.269289	1.6554	0.475985	-1.15685	-0.719421	0.62822	0.166096	0.99323	2.07089	0.503023	1.4787	1.36317	0.362898	-0.406031	-2.0707	-0.247007	-1.03263
BLCA	TCGA-DK-AA76	TCGA-DK-AA76-01A-11R-A39I-07	0.403608	-0.178653	0.241798	-1.18957	-0.923892	-1.38045	-1.08287	-0.678905	-1.23502	1.3619	-1.82559	-0.493253	0.0931268	-0.107256	0.10148	-0.815547	0.945235	1.26973	-1.06432	-0.397563	1.08363	-0.693474	0.402702	-0.238067	1.27296	-0.787432	-0.593519	-0.19061	-0.0522829	0.0477418	-0.790895	0.891581	0.993088	-0.639837	-0.748298	1.64014	-0.897677	0.237996	-0.523141	1.23084	0.59297	1.69101	3.06589	-0.923892	-1.78052	-1.56287	-1.50948
BLCA	TCGA-DK-AA77	TCGA-DK-AA77-01A-11R-A39I-07	-2.42226	0.162687	-0.0344635	0.416729	0.0412042	-0.651133	-0.563518	-0.452245	-0.413105	-1.46712	-1.38113	0.294173	0.29703	-0.388021	0.0765455	-0.709454	1.21366	1.64818	-0.834055	0.54346	0.360416	0.159077	0.468724	0.182394	0.697207	-0.534665	0.314202	0.0763932	-0.389876	0.00589811	-0.788798	1.23133	1.89066	-0.357932	0.788633	0.711166	0.421694	0.297307	0.00786783	0.6054	-0.0190715	0.0672974	0.218989	0.0412042	0.809275	0.049671	-0.378146
BLCA	TCGA-E5-A2PC	TCGA-E5-A2PC-01A-11R-A206-07	-0.230352	-0.240049	-0.83411	1.53389	-0.160812	-1.3018	-1.55713	-1.38288	-1.4999	-1.96427	-1.08901	0.0324858	0.105761	-0.452609	0.0417349	-0.905867	0.661515	1.16895	-0.516999	0.26054	-0.0254382	-0.304607	2.48957	0.0653982	0.943653	-0.345669	0.0101325	-0.137182	-0.567935	-0.0391587	-1.06499	0.372915	0.817931	0.0388846	0.35282	0.15905	-0.391073	2.47785	-0.104136	0.801329	2.41564	2.11955	1.92354	-0.160812	0.58579	-0.191826	-0.482361
BLCA	TCGA-E5-A4TZ	TCGA-E5-A4TZ-01A-11R-A31N-07	0.352377	0.727132	0.574879	-0.808352	-0.0414206	-1.41881	-2.28329	NA	NA	NA	-1.68579	-0.617393	-0.137239	-0.0321542	0.329244	-0.129777	1.5708	1.49577	-1.1544	-1.00064	-0.913276	-0.308008	0.25412	-0.827082	1.2507	-0.73116	-0.752226	-0.3646	-0.0457955	0.330451	0.0662238	1.51009	1.54361	-0.697538	-1.26182	-1.23985	-0.229787	0.173732	-1.2701	1.11865	2.00101	1.60582	3.26918	-0.0414206	-0.870874	-1.19712	-0.952123
BLCA	TCGA-E5-A4U1	TCGA-E5-A4U1-01A-11R-A31N-07	-0.179414	-1.23802	0.319661	-2.06825	-1.23952	-1.53158	-1.3033	-1.19788	-0.231531	1.48279	-1.57019	-0.607838	0.207902	-0.154224	-0.0439532	-0.952886	0.954413	0.71915	-1.62404	0.0511885	0.776159	-0.588098	-0.291813	1.12338	-0.627225	-0.553137	-0.733775	-0.053216	-0.119922	-0.129016	-1.03919	0.780745	-0.10975	-1.16189	0.482904	1.75999	-0.457467	-0.655124	1.21383	-0.899838	2.45014	1.57455	0	-1.23952	-1.25208	0.0587238	-1.19773
BLCA	TCGA-E7-A3X6	TCGA-E7-A3X6-01A-12R-A22U-07	0.229229	0.183174	0.590308	1.71077	0.479856	-0.287288	-0.458772	-1.43628	-1.11426	-1.50091	-0.484827	0.133365	0.233896	0.0972904	0.0923393	-0.414894	-0.487185	1.63093	-0.929493	-0.50372	-0.698104	0.0102157	0.15141	-0.127509	0.152051	-0.0829758	0.0922144	0.0279941	0.162823	0.0258749	-0.44308	-1.2432	1.7694	-0.487948	-0.717684	-1.05505	0.13971	-0.168712	-0.3675	-0.0823689	-0.168912	-0.255928	0	0.479856	1.12938	0.614513	0.180055
BLCA	TCGA-E7-A3Y1	TCGA-E7-A3Y1-01A-11R-A22U-07	0.649832	-0.414475	-1.37853	-0.788903	-0.736487	-0.24231	0.949453	-0.327723	-0.205829	0.542534	-1.22481	-0.194392	0.00945948	0.178988	-0.154058	-0.505355	0.0387082	1.13517	-1.50156	-0.504471	-0.552436	-0.12115	-0.335465	1.14236	-0.620178	-0.399044	-0.296324	-0.283492	0.334092	-0.326778	-0.491652	-0.315169	0.449015	-1.13747	-0.44257	-0.540849	0.0521583	-0.474111	1.29974	-1.11675	-0.168912	-0.461701	0.257313	-0.736487	-1.03847	-0.23298	-1.05529
BLCA	TCGA-E7-A4IJ	TCGA-E7-A4IJ-01A-31R-A26T-07	-2.24886	-1.02036	-0.492391	-1.00668	-0.617665	-0.483763	-0.770907	NA	NA	NA	-0.882618	-0.243064	-0.0020042	-0.297145	0.0130315	-0.418177	0.0896391	1.52174	-0.949477	0.291155	0.596262	-0.467397	1.31606	0.23294	-0.0577372	-0.296414	-0.352947	-0.289379	-0.279667	-0.0583397	-0.375659	-0.350468	1.34295	-0.447529	0.40924	1.2167	-0.469467	1.17748	0.0856797	-0.313641	0.512633	1.20589	3.04223	-0.617665	0.681009	0.446052	-0.766092
BLCA	TCGA-E7-A4XJ	TCGA-E7-A4XJ-01A-11R-A26T-07	0.503095	1.35678	-1.00421	-1.41419	-2.06285	-0.685316	-0.552447	-0.236311	-0.372101	0.110106	-0.742823	0.0707171	0.374453	0.225856	-0.296091	-0.570627	1.24876	1.19183	-2.04822	-0.554006	0.149157	-0.512862	-0.355356	0.249815	-0.562749	-0.211592	0.0225183	0.186227	0.322136	-0.481283	-0.732969	1.25793	0.96369	-1.89241	-0.656658	0.34959	-0.554375	-0.692251	0.152445	-1.12125	-0.168912	-0.461701	0	-2.06285	-1.69392	-1.92628	-0.815577
BLCA	TCGA-E7-A519	TCGA-E7-A519-01A-11R-A26T-07	0.822663	-2.65735	-1.33742	-2.85278	-1.10353	-0.269246	-1.03678	-0.299505	0.334397	-0.0225876	-0.408558	-0.124731	-0.012454	-0.210719	-0.697212	-1.04685	0.0588241	1.39358	-2.98983	-0.40873	-0.755674	-1.94428	-0.899317	1.68597	-2.44314	0.0210951	-0.214673	-0.274136	-0.198687	-1.00823	-1.29175	-0.124774	1.44179	-2.944	-0.594228	-1.0696	-2.42185	-1.37853	2.0158	-2.81519	-0.168912	-0.461701	0	-1.10353	0.218543	0.933953	-0.0794366
BLCA	TCGA-E7-A541	TCGA-E7-A541-01A-11R-A26T-07	-0.785092	-0.809369	0.553105	-0.133894	-0.182578	-0.308666	-0.254525	-2.30396	-1.25867	-1.85775	-1.21724	-0.0592356	0.768813	0.119802	0.117979	-0.619367	0.0600244	1.40763	-0.816568	-0.780667	-0.388519	-0.543987	-0.0332071	-0.0388141	-0.244231	-0.450267	-0.152303	0.621064	0.199041	0.0726894	-0.59049	-0.446347	1.11182	-0.365363	-1.11147	-0.589107	-0.6168	-0.417387	-0.207675	-0.497016	0.247523	-0.461701	0	-0.182578	1.42019	0.813237	0.0962887
BLCA	TCGA-E7-A5KE	TCGA-E7-A5KE-01A-11R-A28M-07	0.330531	-2.33143	0.388875	-0.586129	-0.729855	-1.37369	-1.25527	-0.0640083	-0.776767	0.142315	-2.49983	-0.324985	-0.0808068	-0.232752	0.17641	-0.857234	0.776107	1.41992	-1.93564	-1.22333	-0.599085	-0.754849	-0.494228	-0.0621767	1.19972	-1.11684	-0.428108	-0.376103	-0.151532	0.171457	-0.831895	0.637787	1.35126	-1.57645	-1.55045	-0.779931	-0.964885	-1.05506	-0.265944	1.11309	-0.0341923	0.7645	0	-0.729855	-1.65106	-1.13357	-1.8479
BLCA	TCGA-E7-A5KF	TCGA-E7-A5KF-01A-11R-A28M-07	0.90757	-0.914372	-1.00089	0.0956728	-0.421298	-1.90497	-1.75323	1.86214	0.636211	-0.331871	-1.83035	-0.242527	0.67491	-0.466693	-0.0288407	-1.21721	0.480227	1.91037	-1.75196	0.484071	0.157516	0.0626476	0.667195	0.255047	0.125633	-0.705493	-0.300983	0.512736	-0.479286	-0.144543	-1.4638	0.149041	2.55695	-1.42794	0.530565	0.485639	0.24141	0.526728	0.118613	-0.182776	-0.168912	-0.350603	0	-0.421298	-2.0707	-1.59452	-1.54068
BLCA	TCGA-E7-A677	TCGA-E7-A677-01A-11R-A30C-07	-0.604392	-0.21171	-0.363907	1.11597	0.879149	-0.426742	-0.660417	-0.0646657	-0.149312	1.30729	-0.648582	0.422948	0.638829	0.479147	0.121584	0.655565	-0.0544441	1.15406	0.048979	0.974669	-0.0731736	-1.11222	0.442526	-0.638374	-0.4859	-0.151319	0.438317	0.458906	0.668408	0.0404997	1.06027	-0.653493	0.305231	0.749354	1.21736	0.0309975	-1.34704	0.35865	-0.984786	-1.03653	-0.168912	1.34255	0.135059	0.879149	-0.070476	-0.56464	0.509529
BLCA	TCGA-E7-A678	TCGA-E7-A678-01A-11R-A30C-07	0.871634	0.0509188	-3.59039	-1.50296	-0.87874	-1.31444	-2.09607	0.253421	0.14316	-0.564354	-1.77657	-0.342461	0.0882834	-0.647214	-0.528099	-1.71823	0.893147	1.83667	-2.62227	0.0249645	-0.178369	0.306157	0.613725	1.31393	-0.828395	-0.636802	-0.465143	-0.184276	-0.722805	-0.843697	-2.23653	0.724341	2.36483	-2.51368	-0.134443	-0.241175	0.614899	0.389228	1.47808	-1.39035	-0.168912	-0.293093	0	-0.87874	-0.748948	0.0507641	-1.4122
BLCA	TCGA-E7-A6MD	TCGA-E7-A6MD-01A-41R-A352-07	-0.273524	-0.123817	-0.278981	-0.879341	0.072511	0.50043	1.0852	-3.32067	-2.18082	-3.49929	0.33769	-0.0654138	0.406507	-0.130513	0.0663226	0.477059	-0.508013	1.05566	0.131664	0.281881	0.53703	-0.473927	0.912718	0.447553	0.177839	0.389784	-0.20094	0.241152	-0.138154	-0.0466867	0.852677	-0.964528	0.0287338	0.725555	0.58316	1.2632	-0.468791	0.771181	0.422918	-0.30645	0.448608	0.756842	0	0.072511	0.77409	0.873021	-0.12815
BLCA	TCGA-E7-A6ME	TCGA-E7-A6ME-01A-22R-A32O-07	0.102104	-1.58923	-0.173949	-1.06985	-0.176843	-0.986595	0.22706	-0.257279	0.51831	1.15416	-0.536859	-0.23435	0.213404	-0.205814	0.32157	0.755484	0.408435	0.855903	0.558999	0.647471	0.770448	0.178562	1.14229	0.453361	0.12183	-0.115561	-0.368255	-0.0425013	-0.172028	0.301901	1.37679	0.0975824	-0.349613	1.49213	1.01663	1.44741	0.516881	1.35027	0.366958	-0.154972	0.0950363	-0.0427477	0	-0.176843	0.600629	0.528261	-0.374096
BLCA	TCGA-E7-A6MF	TCGA-E7-A6MF-01A-12R-A32O-07	0.125756	-0.0602707	-4.65732	-0.803449	0.53536	-1.41936	-0.893692	0.491739	-0.750556	-0.390142	-2.18034	-0.616346	0.249378	0.590335	-0.305119	-0.0403466	0.831352	1.51351	-0.768666	-1.19829	0.047792	-0.176814	-1.31326	-0.752479	-0.93236	-0.880049	-0.770773	0.0191924	0.765145	-0.63834	0.155259	0.380396	0.990476	-0.274179	-1.67605	0.417371	-0.107409	-1.85098	-1.17991	-1.38163	-0.168912	-0.461701	0	0.53536	0.0328306	-0.532101	-1.42109
BLCA	TCGA-E7-A7DU	TCGA-E7-A7DU-01A-11R-A32O-07	-0.101678	-0.834156	-0.674483	-1.66544	-0.7033	-0.567438	-0.940521	-1.58415	-0.792834	-1.50607	-1.09866	-0.0722597	0.0725837	-0.434987	-0.262671	-0.93497	0.399469	1.72308	-2.01453	-0.657383	-0.472676	-0.960863	0.356781	0.847426	-0.757839	-0.385599	-0.139565	-0.170126	-0.364723	-0.417043	-1.08772	0.20852	2.33387	-1.69776	-0.56501	-0.492041	-1.12314	0.127892	0.925147	-1.41386	0.0732254	1.31358	0	-0.7033	-1.03455	-0.50525	-0.966185
BLCA	TCGA-E7-A7DV	TCGA-E7-A7DV-01A-11R-A33J-07	-0.649871	-0.0684775	-0.367772	0.977052	0.823438	0.680307	0.50956	-2.1344	-0.733665	-1.50911	0.513922	0.386366	-0.256686	-0.946485	0.00762155	-0.782466	0.208375	-0.018825	-0.496653	0.659873	0.0822766	0.586479	1.91676	1.20856	0.0898207	0.414044	0.353931	-0.570492	-1.19552	-0.0878663	-1.03327	-0.131408	-1.50148	0.0936199	0.829939	0.366924	0.896327	1.88426	1.37139	-0.0211075	1.03024	0.014913	0	0.823438	0.532282	0.820318	1.57135
BLCA	TCGA-E7-A7PW	TCGA-E7-A7PW-01A-11R-A352-07	-0.0372567	-1.21528	-0.12258	-0.303285	-0.468861	-1.11796	0.9748	-0.753262	0.0802591	-0.453195	-1.16484	-0.193613	0.712018	-0.0771359	0.30915	0.365774	0.661031	0.999448	0.336534	1.63538	0.907704	0.594911	2.06655	1.39034	0.0217057	-0.411633	-0.272934	0.517063	-0.0359937	0.320093	0.733087	0.435567	0.444867	1.59055	2.41412	1.71508	1.01046	2.47205	1.64758	-0.174797	-0.168912	0.872834	0.315258	-0.468861	-0.230805	-0.203836	-0.977333
BLCA	TCGA-E7-A7XN	TCGA-E7-A7XN-01A-11R-A352-07	0.296807	1.27825	0.408411	-0.712451	2.31336	-0.418594	-0.672771	-2.086	-0.617823	-0.631289	-1.25893	0.0746404	0.31528	0.228656	0.0957319	-0.923801	1.54362	1.35687	-1.34778	0.348177	-0.485985	0.102895	0.0238703	0.381549	0.203815	-0.521833	0.0393713	0.128553	0.261133	0.024667	-1.17126	1.55123	1.09881	-0.980687	0.362913	-0.65356	0.356624	-0.275664	0.307676	0.159432	0.991171	2.37584	0	2.31336	1.66824	1.52308	0.351618
BLCA	TCGA-E7-A85H	TCGA-E7-A85H-01A-11R-A352-07	-2.50912	0.0117364	0.277513	-1.41439	0.733931	-0.248386	-0.559388	-1.13311	1.77649	-0.572446	-0.642783	-0.260312	-0.123651	-0.265353	0.229697	-0.054896	1.44066	0.976367	-0.637019	-0.846429	-0.147072	0.696513	0.62811	1.04073	0.873889	-0.229757	-0.374944	-0.398284	-0.278951	0.207443	-0.0564343	1.53528	0.149186	-0.187653	-0.943906	0.0817161	1.26772	0.631125	1.11025	0.905036	0.192977	-0.461701	2.49923	0.733931	0.598529	1.07982	0.0513043
BLCA	TCGA-E7-A8O7	TCGA-E7-A8O7-01A-11R-A36F-07	1.03678	-0.219698	-2.406	0.25533	0.50915	-0.986425	-0.278085	-0.185396	-0.269546	0.314541	-1.46714	0.00454477	0.363296	-0.0338948	-0.19313	-0.498671	0.0632764	2.00047	-0.574437	-0.00141547	-0.00083883	-0.568636	0.170461	-0.553158	-0.532541	-0.593764	-0.0606136	0.143283	0.0302165	-0.412922	-0.443478	-0.465071	2.50832	-0.140991	-0.252138	0.227962	-0.679671	-0.103048	-0.914645	-1.07343	-0.168912	-0.461701	0	0.50915	-0.150339	-0.265139	-0.126679
BLCA	TCGA-E7-A8O8	TCGA-E7-A8O8-01A-11R-A36F-07	0.832444	-0.483244	0.318983	-2.10668	-0.578686	-0.485252	-0.585533	-1.18613	-0.690933	-0.495454	-0.901221	-0.384103	0.0129976	-0.109334	-0.08539	-0.758373	1.18385	1.12249	-1.88009	-0.190713	0.00979408	-0.609099	-0.371336	1.29833	-0.00431858	-0.288844	-0.493839	-0.272512	0.00245209	-0.180195	-0.879549	1.31107	0.780411	-1.61855	-0.205562	0.115633	-0.581544	-0.622779	1.51676	-0.287232	1.09203	-0.186956	0	-0.578686	-0.38001	-0.522627	-1.42603
BLCA	TCGA-E7-A97P	TCGA-E7-A97P-01A-11R-A38B-07	0.076539	0.411069	-0.298828	0.884133	1.68652	0.332211	0.57074	-2.20765	-0.480187	-0.405662	0.308908	0.414982	0.382912	0.394787	0.182654	0.0385065	0.000948407	1.14542	-0.0992875	0.144173	-0.459866	0.196409	0.312033	0.12475	0.543654	0.252764	0.426576	0.182028	0.511574	0.134239	0.168536	-0.430567	0.261797	0.591435	0.448473	-0.449804	0.490273	0.231504	-0.0270184	0.365404	-0.168912	-0.329842	0.219669	1.68652	1.05784	1.27749	1.05221
BLCA	TCGA-E7-A97Q	TCGA-E7-A97Q-01A-11R-A38B-07	-1.77968	-1.14434	0.00456111	-1.14037	0.104272	0.0540701	0.538279	NA	NA	NA	-0.426762	-0.102198	0.0404854	-0.18716	0.0631867	0.312898	-1.44595	0.871311	-0.212884	-0.944709	0.232392	-0.944736	-1.43709	-0.307221	-0.335438	-0.0430967	-0.207889	-0.249841	-0.137617	-0.0392682	0.606966	-2.03282	-0.227706	0.332765	-1.07103	0.518609	-1.16038	-1.97456	-0.522846	-0.748735	0.325215	-0.143225	0.402782	0.104272	-0.871578	-0.217934	-0.355519
BLCA	TCGA-FD-A3B3	TCGA-FD-A3B3-01A-12R-A206-07	-0.135052	1.5217	1.07839	2.00282	1.80959	0.746098	0.976863	-0.48183	0.499486	1.11379	1.03103	0.426973	0.228255	0.465981	0.389638	0.678297	0.280781	-0.136425	0.214634	0.388137	-0.757705	0.0119769	0.376739	-0.131422	1.55882	0.664563	0.419226	0.0242941	0.56686	0.396134	1.03637	-0.150044	-1.7787	0.85313	0.604155	-1.10068	0.231482	0.145199	-0.379609	1.49084	1.7647	1.92441	2.36979	1.80959	1.46803	1.23931	1.40778
BLCA	TCGA-FD-A3B4	TCGA-FD-A3B4-01A-12R-A206-07	-0.403986	1.02988	0.279514	0.766673	1.14525	0.298589	0.768122	-0.629697	-0.272101	0.667153	1.09607	0.33692	0.352271	0.370383	0.224549	0.679363	-0.318999	-0.0845367	0.244284	-0.336269	-0.651211	-0.696236	-0.0070728	-0.257894	0.472816	0.699617	0.289753	0.176512	0.440395	0.170232	1.07344	-0.871211	-1.6473	0.914558	-0.699139	-0.9395	-0.863644	-0.454859	-0.486285	0.204949	0.0928021	-0.461701	0	1.14525	1.13389	0.792388	0.87523
BLCA	TCGA-FD-A3B5	TCGA-FD-A3B5-01A-11R-A20F-07	-0.707598	0.572273	0.44273	0.97686	0.588726	-0.338228	-0.642264	-0.559441	-0.46369	-0.520565	-0.6195	0.304589	0.400892	0.216259	0.108857	0.273507	0.288399	0.857848	0.0493331	1.03519	-0.14004	0.20808	1.34444	0.145477	0.0895941	-0.232309	0.30726	0.259657	0.282008	0.0469399	0.519381	-0.201908	0.0651338	0.731075	1.39318	-0.216465	0.282407	1.41163	-0.0654206	-0.267047	2.77811	2.44161	3.25413	0.588726	-1.12861	-0.8365	0.243813
BLCA	TCGA-FD-A3B6	TCGA-FD-A3B6-01A-21R-A20F-07	-0.29027	0.620488	0.496733	-0.0400388	2.63821	0.090345	-0.183707	0.00720187	0.594958	1.19626	-0.0622776	0.0587355	-0.190183	-0.882415	0.208023	-0.659666	0.755337	0.465815	-1.276	-0.438785	-1.18398	-0.376356	0.499953	-0.209283	0.542076	0.0682727	-0.00872469	-0.443582	-1.1384	0.166875	-0.839323	0.508003	-0.824682	-0.924826	-0.611297	-1.77301	-0.327212	0.147459	-0.475272	0.572549	2.88882	2.11613	0	2.63821	1.44419	1.10835	1.97704
BLCA	TCGA-FD-A3B7	TCGA-FD-A3B7-01A-31R-A20F-07	0.132683	0.749742	0.769628	1.72697	1.68894	1.35719	1.16157	-1.1367	-0.895884	-0.957689	1.40157	0.369079	0.175219	0.495717	0.217248	0.570274	0.0031111	-0.450194	0.320678	-0.158277	-0.786084	-0.0697656	-0.246907	-0.38432	0.14384	0.749612	0.345808	-0.0100605	0.691669	0.185507	0.901091	-0.445993	-2.00286	1.05655	-0.141593	-1.20401	0.114799	-0.490294	-0.719728	-0.0448861	0.928174	-0.143667	0	1.68894	1.84938	1.27601	1.52042
BLCA	TCGA-FD-A3B8	TCGA-FD-A3B8-01A-31R-A20F-07	-0.903111	0.563116	0.943117	1.78742	1.58958	1.11491	2.11779	-0.991928	-0.729668	-0.275171	1.80012	0.341449	0.287794	0.37615	0.133701	0.553904	-1.68002	-0.672225	0.844601	-0.0712482	-0.288824	-0.233715	-0.111802	-0.634319	-0.0270377	1.09882	0.287297	0.0258085	0.499272	0.0435048	0.913068	-1.94002	-2.31189	1.61868	-0.114942	-0.34439	-0.196174	-0.492379	-1.02456	-0.327291	2.3317	1.67138	2.29321	1.58958	1.53794	1.55194	1.53497
BLCA	TCGA-FD-A3N5	TCGA-FD-A3N5-01A-11R-A21D-07	0.125702	0.642555	-0.56421	1.98555	1.56443	-0.414877	-0.540465	-1.15285	-0.17189	-0.516275	-0.578596	0.330306	0.218109	0.0838734	0.247609	-0.426144	0.393683	0.618197	-1.01414	-0.0130554	-0.949611	-0.0572285	-0.104607	-0.687251	1.01714	-0.193667	0.330179	0.0669536	0.013825	0.243683	-0.547428	-0.06243	-0.358089	-0.560704	0.076889	-1.53558	0.122567	-0.474083	-1.02708	0.887158	-0.168912	-0.371935	0	1.56443	0.0816606	-0.241527	0.982469
BLCA	TCGA-FD-A3N6	TCGA-FD-A3N6-01A-11R-A21D-07	-0.322315	2.07671	0.896535	1.50798	0.957715	-0.0952987	-0.197781	-1.78373	-1.78632	-0.555348	-0.281269	0.164203	0.168476	0.308314	0.219058	-0.130323	1.57129	0.309864	-0.449355	1.62481	-0.635635	1.27668	1.38576	-0.117156	1.35053	-0.0215444	0.165103	-0.0213399	0.38903	0.171085	-0.026797	1.43261	-0.700129	0.0641058	1.97356	-1.02952	1.47887	1.59839	-0.38471	1.21776	0.0335234	2.09886	0.400354	0.957715	0.633016	-0.0505843	-0.419038
BLCA	TCGA-FD-A3NA	TCGA-FD-A3NA-01A-11R-A21D-07	-1.78407	0.0424367	0.796506	0.638867	0.190136	-0.198313	-0.034883	-0.618086	1.37871	-0.198636	0.222253	0.134744	0.101598	-0.161207	0.163427	0.580706	0.178007	1.23174	0.086916	0.15028	0.173316	-0.0132797	1.08218	-0.0118648	0.414123	0.230293	0.0731251	-0.158402	-0.161631	0.124703	0.86296	-0.258853	0.632176	0.674655	0.237395	0.368492	0.106301	1.02021	-0.250485	0.354507	0.0258929	0.574653	0	0.190136	0.337861	0.357445	0.415402
BLCA	TCGA-FD-A3SJ	TCGA-FD-A3SJ-01A-12R-A22U-07	0.445617	-0.040537	0.15017	-0.621219	-1.05707	-0.0715263	1.30534	-0.671748	-0.644035	-0.664951	0.300179	-0.157288	-0.00364381	-0.142209	0.220608	0.546939	0.433107	0.35318	0.378681	0.551396	1.11581	0.65202	0.528084	0.479133	0.996036	0.338822	-0.276625	-0.249154	-0.121806	0.186568	0.821631	0.166162	-1.2564	0.963306	0.563105	1.85972	1.05732	0.409791	0.353536	0.895024	2.36187	-0.246281	0.440851	-1.05707	-0.534345	1.79258	-0.523997
BLCA	TCGA-FD-A3SL	TCGA-FD-A3SL-01A-21R-A22U-07	-1.57748	-0.318535	-0.609045	-0.0950944	0.162232	1.07999	2.06746	-1.40276	-1.06929	-1.1502	1.01313	0.0845498	0.094692	-0.027368	0.0138459	-0.0997777	-1.61968	0.545529	0.565178	-0.202387	0.464351	-0.444926	-0.0791844	-0.337984	0.437224	0.679239	0.00197124	-0.145983	0.0687228	-0.116887	0.0246717	-2.01801	-0.720364	1.2173	-0.491714	0.714597	-0.474784	-0.353237	-0.586787	-0.0428	-0.168912	-0.164677	0	0.162232	0.19146	-0.244778	0.521854
BLCA	TCGA-FD-A3SM	TCGA-FD-A3SM-01A-11R-A22U-07	0.222918	-1.37419	-0.249579	1.03646	-0.475232	0.498121	0.816508	-0.445284	-0.181482	-0.271527	0.178179	0.416051	0.35748	0.259909	0.0210615	-0.102847	-0.947047	0.843346	0.893109	1.19208	0.0190342	-0.0401897	2.40793	-0.317949	0.431503	0.197192	0.439033	0.177724	0.37269	-0.0956405	-0.0915407	-1.54863	-0.288228	1.62714	1.66694	0.0950039	0.00151096	2.52054	-0.653843	-0.0214501	2.33189	2.49515	0	-0.475232	-0.929351	-1.49097	-8.7631e-05
BLCA	TCGA-FD-A3SN	TCGA-FD-A3SN-01A-12R-A22U-07	-2.30999	0.536752	1.27128	-1.96404	1.00836	0.000714671	0.26617	0.203185	-0.631366	-1.0302	-0.0158827	0.175134	-0.0759957	0.0678571	0.0482407	-0.431796	0.0634043	0.956874	-0.814016	-0.513038	-0.473691	-0.846001	0.305397	0.0624416	0.243296	0.0797488	0.126498	-0.341148	0.0701584	-0.00706437	-0.471237	-0.36325	0.116801	-0.375455	-0.663586	-0.85797	-0.972499	-0.0670845	-0.108775	0.0149686	-0.168912	-0.338291	0	1.00836	0.072707	-0.233319	0.488927
BLCA	TCGA-FD-A3SO	TCGA-FD-A3SO-01A-11R-A22U-07	-1.47859	1.35047	1.74906	1.23491	1.16091	0.277211	0.260868	-1.4751	-0.508081	-0.399387	0.364647	0.0907927	0.0607999	-0.104578	0.254395	-0.434579	0.625091	0.472595	-0.7181	-0.638935	-0.908966	0.117415	0.183213	-0.888708	1.25338	0.302802	0.0393214	-0.14766	-0.0787842	0.239766	-0.523998	0.152848	-0.796385	-0.245283	-0.89748	-1.39538	0.257366	-0.238663	-1.31171	1.05429	0.154221	-0.461701	0	1.16091	0.157296	0.0171745	1.14597
BLCA	TCGA-FD-A3SP	TCGA-FD-A3SP-01A-31R-A22U-07	0.809781	-0.58269	0.787137	0.451346	1.36442	1.85578	1.77756	-0.81879	-0.327839	2.18819	1.78776	0.368411	-0.116639	0.325179	0.133312	0.689174	-2.06474	-1.03752	0.339917	-0.00510244	-0.424992	-0.786195	-0.029275	-0.922212	-0.401041	1.05249	0.340963	-0.396397	0.470078	0.0513651	1.03612	-2.42751	-2.74725	0.982094	-0.0507006	-0.55846	-0.96718	-0.235987	-1.38437	-0.76917	1.71026	0.932456	2.07066	1.36442	0.894984	0.814123	1.65105
BLCA	TCGA-FD-A3SQ	TCGA-FD-A3SQ-01A-21R-A22U-07	-0.601394	-1.21416	-1.70112	0.901015	0.0977425	0.686745	1.5539	-0.745064	-0.360745	-0.196685	0.909067	0.125503	0.538673	0.360463	-0.220039	1.07504	-1.6735	0.646097	0.581873	0.121057	0.139906	-0.447982	-0.329108	-0.423542	-2.04232	0.616345	0.0414518	0.364605	0.454464	-0.462277	1.58975	-2.21644	-1.02054	1.21342	0.0538398	0.305331	-0.361503	-0.740173	-0.720323	-2.43642	-0.168912	-0.343563	0.825391	0.0977425	0.0775395	-0.0340657	0.329147
BLCA	TCGA-FD-A3SR	TCGA-FD-A3SR-01A-11R-A22U-07	-0.300939	-1.44372	0.116548	-0.776515	0.334809	0.289793	1.36577	-1.31294	-0.862947	-1.27334	-0.375378	-0.357405	-0.275465	-0.643436	0.147199	0.0227986	-1.21929	1.1127	0.0552021	-0.652323	-0.0940283	-0.993864	-0.783899	-1.05908	0.605082	-0.04884	-0.516974	-0.603888	-0.767404	0.0493647	0.17723	-1.60266	0.294004	0.633484	-1.14796	-0.0740588	-1.21405	-1.3525	-1.60918	0.171182	0.220384	-0.338965	0	0.334809	0.456354	1.08014	0.575955
BLCA	TCGA-FD-A3SS	TCGA-FD-A3SS-01A-12R-A22U-07	0.661339	-0.319417	0.237316	0.237539	0.774198	-0.364923	-0.250722	-0.304039	-0.229674	-0.710995	-0.535945	0.0794699	0.181076	-0.742875	0.246372	-0.253375	0.322874	1.01595	-0.636835	-0.498387	-0.719883	0.023793	-0.134838	0.0103848	1.09137	-0.164253	-0.00526198	-0.0283728	-0.904292	0.230972	-0.346471	-0.0155965	0.260128	-0.121589	-0.789428	-1.16925	0.238989	-0.637841	-0.0707893	0.928588	-0.168912	0.766653	0	0.774198	-1.16439	-1.45072	0.370219
BLCA	TCGA-FD-A43N	TCGA-FD-A43N-01A-11R-A23W-07	0.636778	0.449204	-0.430454	0.118572	0.187603	0.339262	0.316516	-0.715861	-0.502323	-0.0918	0.269034	0.321143	0.278571	0.279428	-0.0351017	0.649558	-0.312941	1.32837	-0.1569	0.122495	0.349575	-0.384055	0.0138232	0.0560577	-0.0355914	0.231087	0.295891	0.0880913	0.427911	-0.160319	0.908209	-1.01806	1.01704	0.36626	0.178053	0.742845	-0.331888	-0.225594	-0.114006	-0.600797	0.298599	0.103651	0	0.187603	-0.197487	-0.119617	-0.15871
BLCA	TCGA-FD-A43P	TCGA-FD-A43P-01A-31R-A23W-07	0.93301	-1.06837	0.41598	-0.323992	1.06195	0.246799	0.335844	NA	NA	NA	-0.0641112	-0.0511533	0.138328	-0.0377746	0.413078	0.863328	0.588142	0.648258	0.613606	0.0818758	0.29158	-0.205712	1.20474	-0.150899	0.793156	0.103336	-0.158915	-0.0640036	-0.0143561	0.425105	1.33765	0.422836	-0.707764	1.36448	0.135296	0.86119	-0.143427	1.31497	-0.403761	0.628763	0.711278	0.418761	0.165831	1.06195	1.74234	1.64771	0.724646
BLCA	TCGA-FD-A43S	TCGA-FD-A43S-01A-21R-A23W-07	0.229491	0.595951	-2.08612	-0.487802	-0.615411	1.13433	0.686042	-0.772321	-0.893131	-0.130148	1.02021	0.285246	0.325798	0.130177	-0.35763	0.29436	-0.521953	0.812027	-0.28397	0.554266	0.748213	-0.306376	0.690622	1.18004	-2.39441	0.733722	0.218046	0.0951852	0.167117	-0.623348	0.492177	-0.902442	-0.284181	0.273765	0.701099	1.43988	-0.250745	0.457888	1.3444	-2.80611	0.75641	-0.225297	0	-0.615411	1.54078	1.97347	0.414164
BLCA	TCGA-FD-A43U	TCGA-FD-A43U-01A-11R-A23W-07	0.0316398	-0.131366	-0.766135	-1.19373	-0.298894	1.88168	-0.117144	-1.10907	-0.827684	-0.504501	1.80333	0.222178	0.215181	0.137752	-0.162978	0.0956832	-0.904083	0.316795	-0.399315	0.877218	0.870925	-0.7097	0.30915	1.18788	-1.90848	1.03677	0.172494	-0.00160397	0.259932	-0.320824	0.159415	-1.29336	-1.03769	0.0846718	1.2314	1.57484	-0.651837	0.219772	1.4017	-2.36782	-0.168912	-0.461701	0	-0.298894	1.24126	1.44834	0.990982
BLCA	TCGA-FD-A43X	TCGA-FD-A43X-01A-11R-A23W-07	-0.334717	-0.253359	-1.88428	-0.823586	-0.91054	-0.960205	-0.738305	-0.772391	0.0894004	-0.196812	-1.43696	-0.223964	0.142464	-0.24511	-0.246836	-0.976924	0.446321	1.48352	-2.27416	-1.18542	-1.11163	-0.922936	-0.0788021	-0.0241742	-0.568595	-0.538375	-0.328074	-0.07255	-0.178559	-0.433899	-1.13556	0.18978	1.66255	-2.00052	-1.28028	-1.52107	-1.11338	-0.355398	-0.184968	-1.22932	-0.168912	1.35857	0	-0.91054	-1.5372	-1.51751	-1.63271
BLCA	TCGA-FD-A43Y	TCGA-FD-A43Y-01A-21R-A26T-07	-0.62155	0.68966	-0.384437	0.285418	0.747909	0.173782	0.0353563	-1.35744	-0.428366	-0.136273	1.43326	0.308513	0.242891	0.367432	0.0212873	0.454486	0.38478	0.362539	0.206596	0.182727	-0.547082	-0.442642	1.28144	0.10099	-0.015217	0.874807	0.294018	0.03527	0.49086	-0.090261	0.715266	-0.00919444	-0.957985	0.848246	0.325893	-0.697531	-0.441333	1.05432	-0.0887712	-0.275385	0.683124	1.60652	2.36856	0.747909	0.33596	0.082838	0.61679
BLCA	TCGA-FD-A5BR	TCGA-FD-A5BR-01A-11R-A26T-07	-0.36867	2.00868	-0.787945	-0.148991	-0.20043	0.361168	0.35583	-1.09981	-0.84115	-0.665229	0.544404	0.125098	0.341126	0.197645	0.021666	0.895629	-0.401712	1.15469	0.0429742	-0.494862	0.32258	-0.585337	-0.416849	-0.263562	-0.705948	0.401336	0.0469572	0.104673	0.270427	-0.0998087	1.35549	-0.982632	-0.0460163	0.633742	-0.597025	0.709251	-0.678523	-0.830604	-0.493479	-1.30585	-0.168912	-0.14066	0.2393	-0.20043	0.820435	0.737058	0.164869
BLCA	TCGA-FD-A5BS	TCGA-FD-A5BS-01A-21R-A26T-07	0.125685	-0.263103	-1.08962	-0.117187	1.70178	2.16505	0.937856	-1.16844	-0.407406	-0.0342582	1.70497	0.334899	0.385135	-0.168466	-0.131649	0.211157	-0.647673	-0.429531	-0.134223	0.14478	-0.314214	-0.112621	0.916982	0.827425	-1.72978	1.0233	0.281528	0.120563	-0.152203	-0.283621	0.357497	-0.82217	-1.92282	0.479447	0.23564	-0.159079	0.100782	0.792875	0.890065	-1.83984	2.31443	2.02991	3.17151	1.70178	2.07661	2.31297	1.67242
BLCA	TCGA-FD-A5BT	TCGA-FD-A5BT-01A-11R-A26T-07	-0.770212	0.341387	-0.290034	-0.00562816	1.15092	1.73906	0.194625	-0.702846	0.0278496	0.184978	2.21552	0.464587	-0.0761389	-0.339757	-0.41151	-0.359112	-0.771164	-0.306974	-1.89717	-0.465631	-0.606402	-0.703868	0.227118	1.08289	-1.46904	1.20957	0.386775	-0.357662	-0.346772	-0.640356	-0.579334	-1.08033	-1.66745	-1.6676	-0.610185	-0.688662	-0.759736	-0.227567	1.22214	-1.60887	-0.168912	-0.0128442	0	1.15092	1.50635	1.64739	1.86374
BLCA	TCGA-FD-A5BU	TCGA-FD-A5BU-01A-31R-A26T-07	0.503371	0.870447	0.133331	1.62448	1.37672	0.232404	0.603377	NA	NA	NA	1.01339	0.336279	0.275925	0.640266	-0.03397	-0.0431848	-0.0502438	0.247467	-0.00300396	-0.0302943	-0.275075	-0.47943	1.0659	-0.307758	0.0471259	0.659486	0.322425	0.0894261	0.812593	-0.158834	0.0518805	-0.602443	-1.07223	0.509485	-0.0837939	-0.333732	-0.503922	0.851049	-0.613602	-0.215716	-0.168912	0.12822	0.802271	1.37672	0.688395	0.558169	1.05511
BLCA	TCGA-FD-A5BV	TCGA-FD-A5BV-01A-11R-A26T-07	-0.0429064	-0.105913	-0.235611	-0.731082	-0.563126	-0.169556	0.0571434	-1.66582	-1.20143	-1.56662	-0.527325	0.00062614	0.0900631	-0.244399	0.0111138	-0.397858	0.314992	1.17322	-0.756197	-0.766375	-0.060988	-1.24758	-0.517855	-0.047231	0.82603	-0.137903	-0.0857058	-0.161518	-0.235098	-0.0653396	-0.387263	-0.105126	0.588634	-0.249458	-0.88691	0.0493546	-1.60111	-0.822261	-0.140515	0.728163	-0.168912	-0.461701	0	-0.563126	-1.14887	-0.729275	-0.578525
BLCA	TCGA-FD-A5BX	TCGA-FD-A5BX-01A-11R-A26T-07	-0.00381815	0.395632	-0.9123	-0.813639	-0.144794	2.54792	0.714793	-1.68304	-1.35922	0.584049	2.77951	0.36982	0.360137	0.146001	-0.256183	-0.578312	-0.453991	-1.21993	-0.72427	0.123406	-0.320944	0.276015	-0.102425	1.79213	-1.27595	1.56967	0.327953	0.129539	0.334626	-0.459315	-0.67229	-0.771583	-2.71575	-0.312497	0.165118	-0.42429	0.650219	-0.365145	2.12741	-1.31256	2.11564	2.17354	0	-0.144794	0.39687	-0.42408	0.789971
BLCA	TCGA-FD-A5BY	TCGA-FD-A5BY-01A-31R-A28M-07	-0.66497	-0.645308	0.0011637	-0.0541102	0.51172	0.0871496	-0.56948	NA	NA	NA	0.397445	0.183057	0.399572	0.32425	0.138068	-0.157992	-0.427282	1.11878	-0.269687	0.158373	0.0120279	-0.540607	0.730363	0.0609103	0.544748	0.348179	0.1274	0.249646	0.407333	0.0837096	-0.100663	-1.00528	0.19125	0.295807	0.194826	0.161981	-0.573965	0.56227	-0.0506562	0.375055	0.310255	-0.461701	0	0.51172	-0.796504	0.94205	0.4682
BLCA	TCGA-FD-A5BZ	TCGA-FD-A5BZ-01A-11R-A28M-07	-0.0291307	-0.466517	-0.829695	0.658085	-0.309247	1.2949	1.57947	-0.468191	-1.49354	-0.400142	1.51952	0.26961	0.475722	0.313407	-0.00132043	1.00541	-1.61587	0.282826	0.383609	0.515886	0.194892	-0.162389	-0.387263	-0.351908	-0.435927	0.869987	0.236575	0.242678	0.467685	-0.133636	1.51634	-2.20203	-1.52531	1.0854	0.532954	0.352835	-0.0806756	-0.723945	-0.714825	-1.01783	1.54063	2.2973	0	-0.309247	-0.111961	-0.550579	0.399889
BLCA	TCGA-FD-A5C0	TCGA-FD-A5C0-01A-11R-A28M-07	0.164212	0.471755	0.390832	0.22642	-0.606402	-0.409921	0.679693	0.19375	-0.279457	0.274399	-0.520448	0.0659724	0.386324	-0.249192	0.180328	-0.116881	-0.131741	1.53553	-0.569504	-0.206162	0.0458628	-0.785988	0.737603	-0.394638	0.790757	-0.131669	-0.0258017	0.193533	-0.329411	0.126595	-0.0755924	-0.714739	1.37448	-0.20087	-0.364117	-0.05881	-0.959849	0.530042	-0.707032	0.598876	-0.168912	-0.461701	0	-0.606402	-0.446359	-0.613893	-0.575871
BLCA	TCGA-FD-A5C1	TCGA-FD-A5C1-01A-11R-A28M-07	-0.459668	1.34535	0.0782702	1.00879	1.21857	0.875943	0.134611	0.218766	-0.377637	2.05653	1.23648	0.37331	0.790908	0.172124	0.0409361	0.0406377	0.357711	0.581694	-0.46451	-0.180244	-0.362465	0.097296	0.713631	1.07663	-0.57743	0.742734	0.347556	0.661705	0.204933	-0.040525	0.119085	0.0387417	-0.675065	0.14774	-0.170655	-0.368371	0.440827	0.613397	1.19203	-0.692007	-0.168912	-0.321623	0	1.21857	1.3613	0.852016	1.4863
BLCA	TCGA-FD-A62N	TCGA-FD-A62N-01A-11R-A30C-07	-0.957578	0.66411	-0.16437	0.421706	1.78885	1.26088	0.423537	-0.34908	0.423846	0.679963	1.18454	0.442578	0.138376	0.344118	-0.0232316	0.118808	-0.760182	-0.0722669	-0.779727	0.0847016	-0.533118	-0.28441	0.141383	0.131242	-1.10262	0.769597	0.401438	-0.057659	0.441712	-0.135001	0.239599	-1.24786	-1.69891	-0.291434	0.0520889	-0.740336	-0.146539	-0.217031	0.0562264	-1.2976	-0.168912	-0.461701	0	1.78885	2.28083	2.17646	1.99309
BLCA	TCGA-FD-A62O	TCGA-FD-A62O-01A-11R-A30C-07	-0.0241498	0.350008	-0.655301	-0.13562	-0.742564	-0.558822	0.0418361	-1.49807	-2.0602	-1.41038	-0.436328	0.0214053	0.389501	0.0311647	-0.0229904	0.29987	0.872699	1.26199	-0.758599	-0.245473	0.107763	-0.725057	-0.249044	-0.974878	0.302766	-0.053001	-0.070731	0.170356	0.075794	-0.141639	0.426878	0.833419	0.80346	-0.286692	-0.298458	0.266493	-0.901021	-0.389323	-1.42758	-0.131121	-0.168912	0.766993	0	-0.742564	-1.18694	-1.22781	-0.827939
BLCA	TCGA-FD-A62P	TCGA-FD-A62P-01A-32R-A30C-07	-0.350441	0.920626	-0.233215	0.293431	-0.161569	0.520265	0.185761	NA	NA	NA	0.255661	0.146136	0.275068	0.041818	0.0285465	0.0844667	0.550415	1.04656	-0.704585	-0.262837	-0.422623	-0.0829264	0.329462	0.591319	-0.161856	0.277683	0.0748876	0.0264512	0.0302655	-0.052867	0.166826	0.238366	0.331068	-0.239254	-0.257805	-0.551056	0.0981537	0.0557501	0.512896	-0.365131	-0.168912	1.52592	0	-0.161569	0.730699	0.818194	0.567603
BLCA	TCGA-FD-A62S	TCGA-FD-A62S-01A-11R-A30C-07	-0.162601	0.587808	0.447307	1.61596	0.271622	1.11193	1.19363	-0.221529	0.346902	0.456751	1.6941	0.289207	0.0966503	0.514136	0.205379	1.10365	-1.35173	-0.299346	0.21189	-0.529824	-0.571506	-0.719288	-0.0179068	-0.715871	-0.199323	0.996563	0.252671	-0.134082	0.69495	0.15406	1.71793	-1.87909	-2.17283	0.870098	-0.698107	-0.855097	-0.819541	-0.312548	-1.09403	-0.470812	-0.168912	1.68221	0.62117	0.271622	0.689566	0.48202	0.849196
BLCA	TCGA-FD-A6TA	TCGA-FD-A6TA-01A-12R-A33J-07	0.210543	-1.08999	-0.836312	-0.503698	0.283795	0.547128	0.86482	-0.765886	-0.814306	-0.347723	0.62907	0.26228	0.2002	-0.0313622	0.0386357	0.310224	-0.7786	1.2716	-0.00292917	0.324534	0.387729	-0.257365	0.767685	0.213501	-0.324712	0.449351	0.210971	-0.0194796	0.0145828	-0.0604077	0.467177	-1.47831	0.565872	0.601098	0.414491	0.68262	-0.283629	0.583891	0.128583	-0.747382	-0.168912	0.0473487	0	0.283795	0.733225	1.71413	0.605694
BLCA	TCGA-FD-A6TB	TCGA-FD-A6TB-01A-12R-A33J-07	-0.554003	0.153226	0.447851	-0.0511464	0.145087	0.886987	1.10946	-0.496658	1.1864	1.51099	0.557633	0.10663	0.661604	0.276873	0.173591	0.975443	-0.778778	0.177063	0.965729	1.113	0.566631	-0.201178	-0.0954013	-0.0905855	-1.18158	0.418559	0.0275076	0.488008	0.338775	0.110778	1.49936	-1.26565	-1.67941	1.86777	1.52612	1.12062	-0.069794	-0.404157	-0.310074	-1.61763	1.65811	1.81173	2.44256	0.145087	1.41615	1.38884	0.692467
BLCA	TCGA-FD-A6TC	TCGA-FD-A6TC-01A-21R-A33J-07	0.220687	-0.354938	-0.506677	-0.52683	-0.0615959	0.752865	0.814795	NA	NA	NA	0.406874	0.203726	0.200976	0.0371111	0.18535	0.212688	-0.458839	0.839586	-0.260533	0.190511	-0.299979	-0.780312	0.768689	-0.0956611	0.223577	0.330019	0.14593	-0.0312837	0.0714297	0.128085	0.408291	-1.1853	-0.103591	0.217981	0.216137	-0.500266	-0.958877	0.672432	-0.346767	-0.223015	2.94644	0.076601	2.3495	-0.0615959	-0.809278	-0.15592	-0.017405
BLCA	TCGA-FD-A6TD	TCGA-FD-A6TD-01A-51R-A33J-07	-0.552066	1.4912	0.317123	0.960003	1.32338	0.381245	-0.157924	-0.722537	-0.330795	0.784271	1.02755	0.49604	0.274163	0.349345	0.198511	-0.0591007	0.204059	1.06184	-0.0630641	0.318952	-0.370963	0.0307077	1.10506	0.591866	-0.233525	0.623013	0.514234	0.1005	0.452049	0.159717	0.0262948	-0.229845	-0.0423177	0.664722	0.838959	-0.0845892	0.267289	1.1127	0.61636	-0.444633	-0.168912	-0.461701	0	1.32338	0.810423	0.730893	0.984322
BLCA	TCGA-FD-A6TE	TCGA-FD-A6TE-01A-12R-A33J-07	-2.91061	-0.29397	0.185991	0.211818	0.810131	-1.38767	-0.38253	-1.32786	-0.147047	-1.8053	-2.13843	0.233302	0.340794	-0.665066	0.36035	-0.710116	0.572541	1.19875	-0.361506	1.5799	0.903842	1.05295	1.67284	0.203445	1.16476	-0.934899	0.234329	0.17737	-0.794929	0.363487	-0.943015	0.285517	0.462618	0.196594	2.40768	1.67333	1.61452	1.85491	0.0591515	0.999666	-0.168912	-0.461701	0	0.810131	-0.0871297	-0.249407	-0.550784
BLCA	TCGA-FD-A6TF	TCGA-FD-A6TF-01A-52R-A32O-07	-1.56122	0.977001	-0.763594	-0.32182	1.49753	0.823886	0.745069	-0.651513	0.29379	0.351361	0.746024	0.327549	0.216994	-0.0593316	0.10135	-0.0546173	0.360419	0.397231	-0.0758039	0.266706	-0.14304	0.13755	0.285639	0.00906236	-0.0399155	0.503338	0.303698	0.017116	-0.0286696	0.0281757	0.0404849	-0.0504578	-0.898398	0.611271	0.494069	0.103849	0.494665	0.00707033	-0.114358	-0.371061	-0.168912	-0.461701	0	1.49753	0.0543329	-0.237242	0.777841
BLCA	TCGA-FD-A6TG	TCGA-FD-A6TG-01A-11R-A32O-07	-0.0613852	-0.578495	0.0958659	-1.30587	-0.134843	0.692692	1.51131	-1.53873	-1.32562	-0.786619	0.451421	0.0830092	0.068641	-0.00543792	0.0633497	0.472285	-0.483726	0.664243	0.283836	0.18762	0.229607	0.0821381	0.784295	0.11854	-0.55069	0.410327	0.0015379	-0.214943	0.0429835	-0.0304276	0.785574	-0.968021	-0.58385	0.888663	0.261776	0.416834	0.304815	0.612452	-0.0827851	-0.948821	0.254334	0.935108	0.189963	-0.134843	0.282665	0.509454	0.195908
BLCA	TCGA-FD-A6TH	TCGA-FD-A6TH-01A-11R-A32O-07	0.640269	0.32654	1.40987	-0.797579	2.03881	0.402332	0.156917	-1.87381	-1.45912	-2.54327	0.500609	0.439288	-0.120284	-0.252795	0.241643	0.279256	0.706889	0.450764	-0.625089	0.221179	-0.161767	0.569673	1.54188	0.170809	1.22371	0.327626	0.409993	-0.390974	-0.278311	0.220035	0.46244	0.563898	-0.810602	-0.126885	0.437656	-0.167698	1.07956	1.56633	-0.0130369	1.01859	-0.168912	-0.461701	0	2.03881	-0.172122	-0.557832	1.1068
BLCA	TCGA-FD-A6TI	TCGA-FD-A6TI-01A-11R-A32O-07	-0.496845	0.779697	-2.36289	0.478649	-0.387748	-0.36826	-0.164152	-0.215418	0.402908	0.569821	-0.641222	0.200192	0.638165	-0.236847	-0.276703	-0.212411	-0.0113831	1.78215	-0.155989	1.2213	1.21315	1.35886	0.434742	1.4574	-0.667674	-0.188479	0.154653	0.4477	-0.307293	-0.529582	-0.210487	-0.500098	1.70587	0.464184	1.55904	1.9672	2.08606	0.108251	1.67283	-1.21848	-0.168912	1.39779	0.406932	-0.387748	-0.268747	-0.69911	-0.711546
BLCA	TCGA-FD-A6TK	TCGA-FD-A6TK-01A-42R-A33J-07	0.146899	0.435868	1.0324	0.165645	1.82799	1.01664	1.11372	-0.769695	0.0404812	-0.261633	1.09678	0.323325	0.166938	0.0466046	0.213101	0.357977	-1.16248	0.20893	-0.146182	-0.178392	-0.465062	-0.387163	0.591622	-0.0206891	0.317097	0.701929	0.270233	-0.0478252	0.0911412	0.169757	0.535176	-1.69558	-1.27305	0.504396	-0.21529	-0.625858	-0.364115	0.353359	-0.248694	0.12752	-0.0322324	0.32597	0.199754	1.82799	1.11457	1.06439	1.99307
BLCA	TCGA-FJ-A3Z7	TCGA-FJ-A3Z7-01A-12R-A23N-07	-0.97178	0.111354	-1.79762	0.654496	1.56417	1.29834	1.31475	-1.01736	-1.00499	0.0955804	0.462601	0.125293	0.0685489	0.428022	-0.107314	0.0945984	-0.653695	-0.00464104	-0.20979	-1.2848	-0.0646324	-1.33811	-1.21172	-0.140462	-0.172201	0.317122	0.0708641	-0.253618	0.716036	-0.295103	0.29077	-0.933952	-1.41463	0.3329	-1.49006	-0.0483975	-1.78781	-1.72217	-0.371845	-0.541559	-0.168912	-0.461701	0	1.56417	0.0629386	0.172124	-0.539016
BLCA	TCGA-FJ-A3Z9	TCGA-FJ-A3Z9-01A-11R-A26T-07	0.668565	-0.381545	0.127953	-0.0505741	-0.41202	-2.01192	-1.23722	0.387009	1.00722	0.889605	-1.43102	-0.0676963	0.160713	-0.0942754	-0.112845	-0.804563	1.0246	1.75236	-1.98957	-0.210527	-0.0259462	-0.748455	-0.359369	0.130464	0.506552	-0.597934	-0.138431	-0.0494771	-0.0640602	-0.212791	-1.03495	1.15821	2.31202	-1.74046	-0.0292377	0.0923133	-0.855769	-0.658051	-0.0116715	0.254466	-0.168912	1.36032	0	-0.41202	-1.73904	-0.611271	-1.1565
BLCA	TCGA-FJ-A3ZE	TCGA-FJ-A3ZE-01A-11R-A23N-07	0.00381815	-0.38584	-0.873273	0.316629	-1.40751	-1.73209	-1.42615	-0.218152	0.259716	-1.61142	-1.94677	-0.0437663	0.0210097	0.10136	0.201158	-0.66445	0.990176	1.04462	-1.09567	-0.615865	-0.325638	-0.318402	-0.352848	0.386904	1.25815	-0.866035	-0.0749976	-0.222299	0.166727	0.169141	-0.728204	0.923607	0.50634	-0.575026	-0.605194	-0.409961	-0.350002	-0.698905	0.317467	1.06196	-0.041091	-0.461701	0	-1.40751	-1.67026	-1.25862	-2.02818
BLCA	TCGA-FJ-A3ZF	TCGA-FJ-A3ZF-01A-11R-A23N-07	0.82659	-1.23495	-0.000538304	-0.843746	-0.28919	-1.18907	-0.477009	0.937776	0.200346	0.996528	-2.11291	-0.632689	-0.327997	-0.502742	0.181374	-0.395357	1.14982	0.82283	-0.748645	-0.621945	0.471821	-0.344349	0.414668	-0.177024	1.01381	-0.909523	-0.789976	-0.646466	-0.531684	0.151476	-0.292866	1.08771	0.108885	-0.217918	-0.751341	0.979611	-0.350425	0.335164	-0.422207	0.875725	1.80454	1.41485	2.64471	-0.28919	-1.43939	-0.759386	-1.93823
BLCA	TCGA-FJ-A871	TCGA-FJ-A871-01A-11R-A352-07	0.617871	0.763827	0.389224	-0.858453	0.449183	3.75641	2.44896	NA	NA	NA	1.98254	0.238406	0.138286	-0.517069	0.0722163	-0.173828	0.910196	-1.87048	-1.49577	0.463215	-0.474251	0.286954	0.644956	0.997177	-0.376289	1.1501	0.190874	-0.0685851	-0.674006	0.00203494	-0.280857	0.793802	-3.56867	-1.2051	0.780252	-0.712515	0.637446	0.522025	1.08156	-0.455185	-0.0314298	-0.461701	0	0.449183	-0.820974	-0.898371	0.360059
BLCA	TCGA-FT-A3EE	TCGA-FT-A3EE-01A-11R-A206-07	0.736896	1.00094	-0.872702	0.881513	1.39053	-0.969313	0.0414315	NA	NA	NA	-0.140546	0.236514	0.674479	0.198645	-0.0432552	-0.296619	1.22528	1.00063	-0.717471	-0.24254	-0.305146	0.601655	0.618392	-0.0750838	0.879425	0.0820235	0.214263	0.516437	0.285277	-0.170718	-0.232187	0.978209	0.0728749	-0.189671	-0.294195	-0.467255	0.969392	0.542457	-0.318717	0.609643	-0.0832933	-0.461701	0	1.39053	-0.664724	-1.37387	0.200596
BLCA	TCGA-FT-A61P	TCGA-FT-A61P-01A-11R-A30C-07	0.117666	0.66817	0.0451968	0.825121	1.90524	0.604868	0.844325	-0.0639257	0.809068	0.682677	0.605263	0.346181	0.40873	-0.283669	0.0663532	-0.270392	-0.538868	0.868114	-0.978624	0.581226	-0.33395	-0.122675	1.24456	-0.789496	-0.451971	0.451304	0.324595	0.130294	-0.331859	-0.00940819	-0.280927	-1.0067	-0.131738	-0.544829	1.08853	-0.308575	0.0836475	1.29022	-1.16323	-0.718104	-0.168912	-0.15684	0	1.90524	0.82865	0.49486	1.45699
BLCA	TCGA-G2-A2EC	TCGA-G2-A2EC-01A-11R-A180-07	-0.413433	-1.23164	-1.70228	0.816129	-0.419443	0.716095	1.37805	-0.948109	0.28071	0.44605	0.336074	-0.0469754	0.187574	0.031369	-0.17537	0.917006	-1.33194	0.656585	0.344621	-0.423737	0.29242	-0.890031	0.0646106	-0.294198	-0.810521	0.373945	-0.140504	-0.0532689	0.122413	-0.403859	1.42987	-1.81272	-0.750218	0.977964	-0.535049	0.494521	-1.16111	-0.286152	-0.566626	-1.31536	-0.0374903	0.0570059	0	-0.419443	0.505421	0.990167	0.166588
BLCA	TCGA-G2-A2EF	TCGA-G2-A2EF-01A-12R-A18C-07	0.195629	0.627091	1.09022	-0.260882	2.41278	1.19226	0.957833	0.391497	-0.16996	1.40343	1.64706	0.194133	-0.0111622	-0.00318772	0.203259	-0.768156	0.122098	-1.00567	-0.732261	-0.179754	-1.11193	-0.331389	0.423887	-0.120667	1.39645	1.01819	0.117948	-0.260518	-0.0434475	0.158408	-0.927275	-0.189439	-2.67951	-0.201428	-0.371007	-1.68951	-0.329171	0.386026	-0.387713	1.21016	-0.168912	-0.320453	0	2.41278	1.00667	1.03216	1.39652
BLCA	TCGA-G2-A2EJ	TCGA-G2-A2EJ-01A-11R-A180-07	-1.52222	1.24071	0.739456	1.65276	1.74836	-0.582822	-1.22625	0.233994	-0.952846	0.98137	-1.30279	0.162219	0.0024398	-0.00080981	0.137511	-0.941877	1.20224	1.16897	-1.43789	-1.09386	-1.41395	-0.342744	-0.492821	0.0207237	1.35573	-0.570481	0.155083	-0.224139	-0.0432329	0.0926297	-1.08634	1.04215	0.891257	-1.01033	-1.19234	-2.04084	-0.34532	-0.700493	-0.23206	1.33936	2.28447	2.73521	3.65835	1.74836	0.0421402	-0.0896801	1.08538
BLCA	TCGA-G2-A2EK	TCGA-G2-A2EK-01A-22R-A18C-07	0.828747	-0.598406	-1.32647	0.0492832	-0.759138	-0.271891	0.170574	0.678555	0.532898	2.2031	-1.01656	-0.213317	0.562003	-0.0300599	-0.062404	0.434646	-0.111252	1.66258	0.0612124	0.45739	0.986159	-0.240867	-0.413781	0.0560686	-0.345937	-0.285066	-0.345103	0.32388	-0.0249637	-0.234135	0.812883	-0.567704	1.39558	0.708725	0.595767	1.81676	-0.181276	-0.799429	-0.106848	-0.886248	2.36364	2.26787	0.178007	-0.759138	-0.332256	0.396938	-0.619994
BLCA	TCGA-G2-A2EL	TCGA-G2-A2EL-01A-12R-A18C-07	-1.74509	-3.81506	1.57184	1.08061	-0.250665	-1.19918	-0.701936	1.4207	0.667129	0.998117	-1.39744	-0.0327085	-0.299795	0.230841	0.493018	-0.583198	1.402	-0.553992	-1.00519	0.591609	-0.707409	0.168938	0.607856	0.45721	2.03252	-0.566893	-0.0840088	-0.677369	0.37986	0.558746	-0.573539	1.12013	-1.92013	-0.323519	0.843704	-0.978313	0.455328	0.455958	0.459151	1.65438	1.09651	-0.461701	0	-0.250665	-1.43463	-1.6977	-0.869268
BLCA	TCGA-G2-A2EO	TCGA-G2-A2EO-01A-11R-A180-07	-0.153449	-0.502541	-0.0916583	-0.0756472	0.0705987	0.826058	0.44934	-0.820443	-0.903563	-1.32241	0.655292	0.521405	0.515938	-0.283394	0.0671274	-0.0692425	1.1186	0.456555	-0.08496	0.812882	0.424999	0.666284	1.34345	1.71877	0.484458	0.423929	0.542639	0.38497	-0.280011	-0.00283398	-0.0914225	1.06448	-1.03506	0.494037	1.21452	0.838821	1.20752	1.33337	2.03275	0.517424	-0.168912	-0.461701	0	0.0705987	1.24763	1.14722	0.464242
BLCA	TCGA-G2-A2ES	TCGA-G2-A2ES-01A-11R-A180-07	0.0119292	0.610701	0.279084	0.493648	1.25432	0.116173	-0.205609	-1.42191	-1.4911	-1.28798	0.217082	0.421852	0.155283	0.260383	0.160358	-0.395369	1.75323	0.920561	-0.842034	0.426243	-0.307728	0.783404	0.536923	0.95327	1.04497	0.18484	0.451234	-0.0446775	0.344639	0.118786	-0.447182	1.53234	0.22379	-0.388458	0.840674	-0.523249	1.27854	0.631613	1.02779	1.01936	-0.168912	-0.461701	0	1.25432	0.353923	0.158018	0.591471
BLCA	TCGA-G2-A3IB	TCGA-G2-A3IB-01A-11R-A20F-07	-0.511412	0.968728	0.59341	0.528749	-0.0980305	-0.196676	-1.11249	-0.608183	0.837025	2.06946	-0.598424	0.292807	-0.153632	0.285945	-0.0300768	-0.279956	1.43551	1.1824	-0.52756	0.287523	-0.954728	0.041706	1.78269	-0.26907	0.830442	-0.198271	0.318996	-0.3877	0.358607	-0.111584	-0.22365	1.40779	0.862471	-0.0642589	0.703393	-1.37452	0.214149	1.84283	-0.54555	0.649819	-0.0461396	-0.353996	0	-0.0980305	-0.76896	-1.40988	-0.201994
BLCA	TCGA-G2-A3IE	TCGA-G2-A3IE-01A-11R-A20F-07	0.0408101	-0.452311	-1.0066	-1.76306	-0.322994	-1.04289	-1.42669	-0.151728	2.20169	-0.366511	-1.37604	-0.487024	0.0904668	-0.212395	-0.216849	-0.394954	0.0440073	1.50942	-1.34748	-0.744207	0.0657288	-1.10343	-0.222462	0.0492111	-0.488702	-0.498525	-0.631267	-0.139693	-0.262022	-0.3952	-0.378257	-0.325918	1.55112	-0.987375	-1.08287	0.0275736	-1.4214	-0.590439	-0.0851215	-0.994299	-0.168912	-0.249496	0	-0.322994	-0.504401	-0.0808029	-1.20513
BLCA	TCGA-G2-A3VY	TCGA-G2-A3VY-01A-11R-A22U-07	0.731728	-1.72153	-0.420377	-1.10531	-0.43584	-1.64262	0.429046	0.606071	1.19537	-1.04595	-2.2999	-0.473449	-0.221467	-0.389127	0.10371	-0.490488	0.865999	1.21007	-0.740697	-0.193579	0.508151	-0.465578	0.991268	-0.637041	0.870447	-1.02259	-0.583867	-0.530697	-0.382651	0.0336634	-0.474906	0.649152	0.806896	-0.197939	-0.343238	0.918641	-0.546564	0.762029	-1.06592	0.610475	2.41371	1.73631	1.45384	-0.43584	-1.50634	-1.86774	-1.80898
BLCA	TCGA-G2-AA3B	TCGA-G2-AA3B-01A-11R-A39I-07	-2.13019	-1.51601	-0.639127	-1.58974	-0.435834	-1.45033	-1.64314	-0.0775536	-0.0807215	0.819534	-1.81103	-0.192964	0.181727	-0.519553	0.0997821	-1.10122	0.807243	1.57216	-0.982295	0.578501	1.28816	0.590462	0.735176	1.11133	0.243663	-0.781531	-0.270426	-0.0777508	-0.618656	0.0539346	-1.28243	0.833413	1.7588	-0.558627	0.756085	2.52405	0.9314	0.606365	1.22788	0.202219	2.18981	-0.0335894	0.945459	-0.435834	0.834639	0.244679	-0.737629
BLCA	TCGA-G2-AA3C	TCGA-G2-AA3C-01A-21R-A39I-07	-0.151989	-0.0607817	-0.0359294	0.339395	-0.148318	2.30037	0.684795	1.14644	1.42398	0.217905	0.758594	0.130088	-0.0415485	-0.581831	-0.0569249	-1.87471	0.839522	-1.37376	-1.32266	0.515354	0.0648225	0.18408	2.21425	1.36042	-0.219017	0.540401	0.0705651	-0.270665	-0.656542	-0.157854	-2.56877	0.710973	-2.71838	-0.998776	0.812493	0.320049	0.45252	2.18087	1.56134	-0.158492	2.86078	1.89803	2.94337	-0.148318	0.258317	0.0543971	0.602965
BLCA	TCGA-G2-AA3D	TCGA-G2-AA3D-01A-11R-A39I-07	-0.897286	-0.782427	0.571914	-1.16556	-0.624231	-1.37997	-1.33364	NA	NA	NA	-1.22187	-0.418796	0.0492262	-0.319372	0.0897932	-0.540039	0.743768	1.5186	-0.945189	-0.0226448	0.425613	0.0332965	0.797956	0.198594	-0.0989033	-0.460448	-0.552091	-0.200429	-0.389177	0.0292852	-0.548804	0.574928	1.60605	-0.52444	-0.0337384	0.634833	0.172447	0.747169	0.0514745	-0.541883	0.0977536	-0.461701	0	-0.624231	-1.31397	-0.411833	-1.07863
BLCA	TCGA-G2-AA3F	TCGA-G2-AA3F-01A-12R-A42T-07	0.141992	-0.420498	-0.0408903	-0.694735	-0.764955	-0.923687	-0.446121	NA	NA	NA	-1.61917	-0.516755	-0.0944575	-0.334619	0.0174275	-0.545382	0.901915	1.11109	-0.855354	-0.756814	-0.0217189	-0.00679655	-0.0966164	-0.357313	0.958181	-0.684016	-0.665372	-0.37202	-0.356428	-0.0799765	-0.625704	0.731235	0.743681	-0.497254	-1.03861	-0.0607418	0.183844	-0.314128	-0.660718	0.779552	-0.168912	-0.0523116	0	-0.764955	-1.15836	-0.718993	-0.52749
BLCA	TCGA-GC-A3BM	TCGA-GC-A3BM-01A-11R-A22U-07	-3.43783	0.443486	-1.02269	0.311268	0.19354	-0.838933	-0.240325	-0.338567	0.609156	0.348597	-1.30045	0.028982	0.105624	0.0334821	0.0891051	0.0458152	1.22434	1.03437	-0.493778	-0.565269	-0.481905	-0.193768	0.113036	-0.429614	0.521597	-0.484849	-0.0426136	-0.181412	0.14666	-0.00250035	0.270317	0.984705	-0.040025	0.0140621	-0.614437	-0.463527	-0.186182	-0.186938	-0.757454	0.161557	0.0597774	1.65816	0	0.19354	-0.0372274	-0.642068	-0.268867
BLCA	TCGA-GC-A3I6	TCGA-GC-A3I6-01A-11R-A20F-07	0.229727	0.780661	1.41245	0.712682	1.39584	-0.461234	-0.231506	-1.1051	-0.627304	-0.743357	-0.443529	0.0975275	0.617862	0.231489	0.314525	0.454617	-0.0481982	1.45915	-0.33595	0.129156	-0.548567	-0.222487	-0.0111647	-0.438055	0.314558	-0.0858442	0.0466566	0.455849	0.30774	0.299278	0.70749	-0.56121	0.967759	0.186037	0.0684835	-0.781436	-0.146199	-0.355865	-0.74472	0.0419155	-0.0421614	-0.461701	0	1.39584	0.00499671	0.662655	0.106435
BLCA	TCGA-GC-A3OO	TCGA-GC-A3OO-01A-11R-A22U-07	0.215426	-0.433013	0.743685	0.0236345	-0.0817779	0.341759	1.48322	NA	NA	NA	0.131215	0.17708	0.155861	-0.1255	0.148211	0.0573431	-0.657793	1.22799	-0.0687769	0.0409828	0.248315	-0.0319498	0.518343	-0.439035	0.125257	0.18316	0.107318	-0.0548454	-0.115037	0.080918	0.234406	-1.25116	0.292579	0.52323	0.120945	0.637999	0.0706135	0.468234	-0.724393	-0.353278	0.177363	-0.461701	0	-0.0817779	-0.65617	-0.968994	0.0493865
BLCA	TCGA-GC-A3RB	TCGA-GC-A3RB-01A-12R-A220-07	-1.77359	1.09028	1.3436	-0.548704	-0.445241	-1.26768	-1.01809	NA	NA	NA	-0.237635	-0.0877752	-0.0354077	-0.117694	0.280001	0.329799	1.56337	1.10363	-0.647357	0.196166	-0.0619424	0.114746	0.861314	-0.461176	1.36877	-0.000846867	-0.148095	-0.300339	-0.111505	0.287114	0.637685	1.56608	0.325299	-0.21214	0.345383	-0.115896	0.381419	0.79595	-0.819881	1.39604	-0.0672033	-0.372475	0	-0.445241	-0.172928	-1.13313	-0.488061
BLCA	TCGA-GC-A3RC	TCGA-GC-A3RC-01A-11R-A22U-07	-0.872605	0.799762	1.19196	1.88785	1.23949	-0.0725716	-0.307193	NA	NA	NA	0.26984	0.128008	0.11445	0.648486	0.123646	-0.291636	0.241479	0.510628	-1.2723	-0.777656	-1.64355	-0.367606	-0.112117	-1.04505	0.606211	0.221639	0.0839527	-0.0414277	0.821205	0.0570752	-0.26791	-0.202539	-0.64608	-0.889081	-0.950766	-2.513	-0.380445	-0.483958	-1.48011	0.458525	-0.168912	-0.461701	0	1.23949	0.813671	0.915821	0.853348
BLCA	TCGA-GC-A3RD	TCGA-GC-A3RD-01A-12R-A22U-07	0.441307	-0.416903	-0.389261	-0.582167	-1.2123	-0.487296	-0.479817	NA	NA	NA	-0.271718	-0.0916989	0.365538	-0.509925	0.025796	0.44767	0.849685	1.38378	-0.565185	-0.26552	0.00190117	-0.0871095	0.974436	0.0424682	0.460449	-0.0311172	-0.18256	0.125021	-0.60231	-0.0668885	0.745188	0.773429	1.15467	-0.122132	-0.191947	0.0164685	0.0282027	0.915926	-0.129638	0.248891	2.31421	0.642136	0.604261	-1.2123	-1.13411	-0.844941	-0.463011
BLCA	TCGA-GC-A3WC	TCGA-GC-A3WC-01A-31R-A22U-07	0.134643	1.1794	-0.154586	0.487654	2.20095	0.393141	0.901088	-1.20112	-0.54705	-0.16984	0.215191	0.121717	0.0386107	0.308654	0.314615	0.151427	0.705459	0.382209	1.70543	0.555707	0.102605	0.549826	1.07444	0.159911	0.641299	0.279251	0.0546914	-0.214208	0.385127	0.278371	0.44145	0.248036	-1.04235	2.65944	0.779288	0.286179	0.97147	1.1067	0.000152081	0.391086	2.12468	1.26095	3.34263	2.20095	1.54317	1.00342	1.04485
BLCA	TCGA-GC-A3YS	TCGA-GC-A3YS-01A-11R-A23N-07	0.0494041	0.902634	0.571513	1.73449	0.662937	0.666037	0.664811	-1.7256	-0.649056	-1.20791	0.760666	0.230069	0.237655	0.569781	0.319526	0.199382	-0.0914274	-0.0677794	0.255164	-0.483443	-0.828237	-0.506621	0.0574399	-0.0563573	1.01291	0.485538	0.188836	0.0522245	0.728137	0.317477	0.429674	-0.646123	-1.96042	0.998595	-0.667821	-1.23311	-0.522971	-0.21214	-0.278542	0.834118	-0.168912	-0.239838	0	0.662937	0.0512693	0.935498	0.913843
BLCA	TCGA-GC-A4ZW	TCGA-GC-A4ZW-01A-11R-A26T-07	0.45843	-0.0926676	-0.0995472	1.91921	1.59429	-1.33014	-1.85474	NA	NA	NA	-1.43786	-0.177427	-0.151857	-0.995023	0.155131	-0.664548	0.546897	1.10101	-1.47035	-0.810192	-0.777778	0.187651	1.09044	-0.38312	0.932286	-0.578074	-0.261838	-0.454221	-1.22306	0.112265	-0.786416	0.236076	0.55914	-1.05165	-1.06143	-1.10479	0.558943	1.00031	-0.658199	0.621437	-0.0277861	-0.0246652	0	1.59429	-0.497235	-1.01977	-0.850474
BLCA	TCGA-GC-A6I1	TCGA-GC-A6I1-01A-12R-A31N-07	-0.62571	1.21745	-1.24628	-0.0253067	0.905224	0.650467	-0.672931	NA	NA	NA	0.528349	0.321275	0.154347	-0.36612	-0.042658	-0.4286	0.953034	0.203577	-1.11361	0.357913	-0.2037	0.0244458	1.02789	0.736612	-0.11731	0.388506	0.292855	-0.0591123	-0.492606	-0.167241	-0.541661	0.821829	-1.24125	-0.714034	0.36506	-0.207182	0.20434	0.871007	0.736517	-0.121347	0.26394	2.35568	0	0.905224	1.39155	1.37746	1.20187
BLCA	TCGA-GC-A6I3	TCGA-GC-A6I3-01A-11R-A31N-07	-0.116774	-0.933279	-1.21345	-2.096	-0.0011525	0.414193	-0.895047	NA	NA	NA	0.00537787	-0.129079	0.180599	-0.230809	-0.17951	-0.402665	0.726752	0.647271	-1.14376	0.417349	0.0255239	-0.085694	1.59097	1.95439	-1.23169	0.145577	-0.235539	-0.00976524	-0.252454	-0.311739	-0.588904	0.68914	-0.413087	-0.783948	0.868062	0.334435	0.158524	1.75633	2.28577	-1.4536	0.15771	0.748068	0	-0.0011525	1.45469	1.35587	0.201835
BLCA	TCGA-GD-A2C5	TCGA-GD-A2C5-01A-12R-A180-07	0.0975948	-2.44984	-0.0101563	-0.491073	0.0101357	0.077936	0.762822	-0.916853	0.934772	-0.180082	-0.0477365	-0.0161023	0.0793315	-0.284019	0.126343	-0.417194	0.0376943	1.12704	-0.101781	-0.0973914	0.258075	-0.259404	0.543562	0.0734102	0.683561	0.102054	-0.106538	-0.163326	-0.249232	0.0557979	-0.449243	-0.362174	0.492254	0.466324	-0.223318	0.374617	-0.194999	0.23914	-0.0801343	0.445021	2.45492	-0.348751	3.5976	0.0101357	-1.23156	1.71807	-0.622309
BLCA	TCGA-GD-A3OP	TCGA-GD-A3OP-01A-21R-A220-07	-0.151504	-0.96602	-2.25499	-0.329543	0.0418178	0.268994	0.750331	-0.410716	-0.933757	-0.343879	-0.37337	-0.0493951	0.507174	0.113945	-0.0559063	0.622023	-0.930626	1.59232	0.292715	-0.285421	0.956025	-0.164382	-0.132134	-0.562058	-0.59728	-0.0128425	-0.15692	0.304164	0.215762	-0.239449	1.08107	-1.5467	1.05417	0.943006	-0.414389	1.6786	-0.148348	-0.380975	-0.913185	-1.17117	-0.168912	-0.461701	0.148988	0.0418178	-0.0294399	0.00593626	0.00606699
BLCA	TCGA-GD-A3OQ	TCGA-GD-A3OQ-01A-32R-A220-07	0.141324	0.111827	1.31056	0.942997	0.631892	0.248146	-0.269591	0.177349	0.259285	1.08975	0.122371	0.376771	0.569477	0.00588059	0.140589	-0.0427694	0.185907	1.86325	-0.908861	0.0316499	-0.35693	-0.437797	0.117687	-0.550922	0.521566	0.145916	0.375321	0.411332	0.00600624	0.105044	0.119827	-0.315614	2.34979	-0.464538	-0.0836885	-0.654929	-0.493241	-0.299449	-0.898759	0.267716	-0.168912	-0.0501264	0	0.631892	-0.938435	-1.36595	0.349477
BLCA	TCGA-GD-A3OS	TCGA-GD-A3OS-01A-12R-A220-07	1.44066	-0.588525	0.684327	0.245722	-0.631691	1.8427	1.20593	-0.721496	0.712065	-0.0829077	1.84902	0.278688	-0.152119	-0.130324	0.267045	0.868905	-0.469043	-2.09287	0.26598	0.183543	-0.344577	-0.543388	0.171071	-0.61556	-0.150416	1.0343	0.246755	-0.454085	-0.140844	0.225379	1.35022	-0.855215	-3.46069	1.01356	0.352799	-0.410577	-0.501413	-0.176594	-0.892286	-0.453242	-0.0714223	2.6458	3.37084	-0.631691	0.24883	0.0744072	-0.631463
BLCA	TCGA-GD-A6C6	TCGA-GD-A6C6-01A-21R-A31N-07	-0.194145	-1.3709	0.955343	-3.43283	-2.06285	-1.2342	-0.672349	-0.44876	1.21936	-0.483515	-1.03554	-0.566523	-0.123214	-0.781393	-0.386053	-1.75829	0.788837	0.996929	-3.03981	-0.885572	-0.0730501	-0.976489	0.246143	2.08442	-1.09359	-0.274259	-0.73845	-0.325663	-0.985558	-0.526393	-2.34168	0.778945	0.721722	-2.81606	-0.876706	0.257859	-1.05745	-0.112533	2.53145	-1.18441	-0.168912	1.98165	0	-2.06285	-0.866903	-1.48485	-0.600125
BLCA	TCGA-GD-A76B	TCGA-GD-A76B-01A-11R-A32O-07	0.894577	0.63226	-1.51811	-1.31466	0.101319	0.105857	-0.420894	0.17053	-0.246355	-0.14559	-0.509215	-0.0591472	0.463108	-0.122549	0.0187329	0.120663	0.373815	1.63485	0.0777661	0.654297	1.82176	-0.0385068	0.603349	0.988003	-0.518234	-0.138131	-0.138781	0.296732	-0.0768837	-0.0961271	0.296378	0.151534	1.54454	0.695547	0.8092	3.00807	0.062575	0.573147	1.02059	-0.875882	-0.0290854	1.25004	0.844748	0.101319	1.25212	0.942705	0.325729
BLCA	TCGA-GU-A42P	TCGA-GU-A42P-01A-11R-A23W-07	0.643789	-1.16914	0.219268	0.186878	-0.719026	-0.755813	-0.642438	NA	NA	NA	-1.36702	-0.173754	-0.128111	-0.355046	0.316893	-0.00290153	0.761542	1.21854	-0.520576	0.213509	0.702302	0.382448	0.807497	-0.0533598	1.26666	-0.551609	-0.274237	-0.406324	-0.290244	0.305136	0.237455	0.40018	0.547734	0.0605667	0.300471	1.44	0.745639	0.839131	-0.284352	0.924553	2.6851	1.9484	3.05838	-0.719026	-1.34053	-1.48215	-1.55416
BLCA	TCGA-GU-A42Q	TCGA-GU-A42Q-01A-11R-A23W-07	-3.20207	1.23388	1.28416	0.687056	-0.993975	-0.972389	-0.282794	NA	NA	NA	0.629329	0.324881	0.0794614	0.440608	0.303418	0.376005	1.3721	0.075288	0.962504	1.01943	-0.46731	0.773619	2.51093	0.148887	1.37183	0.467664	0.363051	-0.13332	0.581459	0.306884	0.710653	1.24725	-1.21877	1.7368	1.69218	-0.433971	1.18318	2.69363	0.000331523	1.11778	2.95228	1.441	3.10655	-0.993975	-1.1399	-0.609433	-0.802119
BLCA	TCGA-GU-A42R	TCGA-GU-A42R-01A-11R-A23N-07	-0.4645	-0.534601	-0.0383641	-0.107736	-0.245372	-0.606377	-0.0362778	-0.147273	-0.512955	0.620182	-0.889631	0.0911081	0.0536022	0.0279796	0.0880489	0.337289	0.141752	1.21974	-0.879179	-0.727747	-0.488826	-0.967308	-0.444449	-0.218754	0.70282	-0.316927	0.0771801	-0.202822	0.179117	0.00448927	0.824576	-0.376861	0.737071	-0.340807	-0.731112	-0.699734	-1.22772	-0.723766	-0.499392	0.321447	-0.168912	1.70412	0	-0.245372	-1.38302	-1.19445	-1.34229
BLCA	TCGA-GU-A762	TCGA-GU-A762-01A-11R-A33J-07	0.332491	0.218559	1.23582	-0.937866	1.14601	1.74843	-0.193286	-1.0222	-0.454055	-0.563762	0.981138	0.123909	0.0313874	0.0704106	0.105265	-0.246274	-0.128107	-0.181517	-0.768148	-0.135147	-0.353067	-0.172595	0.362113	0.465658	-0.113339	0.675755	0.0848194	-0.183392	0.0531078	0.0533492	-0.267523	-0.522289	-1.65687	-0.224672	0.0980994	-0.0477286	0.0225422	0.228623	0.433599	-0.148601	-0.0192786	-0.461701	0	1.14601	1.9368	1.86064	1.87306
BLCA	TCGA-GU-A763	TCGA-GU-A763-01A-11R-A32O-07	0.921653	0.0977448	-1.81783	-1.60276	-1.00252	-1.55409	-2.45013	-0.199592	-0.737597	0.0485657	-1.81157	-0.238471	0.255667	-0.83363	-0.238451	-1.35062	1.63828	1.41417	-2.03045	0.870963	0.754819	0.937677	0.713021	2.35252	-0.300944	-0.679062	-0.344806	0.0495665	-0.961979	-0.398872	-1.77288	1.87411	1.43185	-1.82659	1.20466	1.2931	1.58372	0.49199	2.8143	-0.535244	1.7059	0.322392	0	-1.00252	-1.52459	-0.874838	-1.2476
BLCA	TCGA-GU-A764	TCGA-GU-A764-01A-11R-A352-07	1.03193	-0.133924	-0.274431	0.383816	2.01467	0.622611	0.327386	-1.27725	0.992323	-0.662104	1.14326	0.293372	0.256177	0.260969	0.162822	0.204806	-0.461036	0.646506	0.157297	0.223317	-0.310796	-0.333639	0.730253	0.386042	-0.270691	0.703482	0.249213	0.0757947	0.328063	0.112203	0.345869	-0.950017	-0.775698	0.965946	0.400319	-0.237565	-0.281426	0.712815	0.335831	-0.587423	1.60553	-0.341796	0.199754	2.01467	0.941678	1.09037	2.74876
BLCA	TCGA-GU-A766	TCGA-GU-A766-01A-11R-A32O-07	-1.58261	1.61164	0.498926	0.113649	2.2034	1.1074	0.0737627	-0.976304	0.281693	-0.443468	0.504885	0.277033	0.268122	0.277746	0.119765	-0.272128	0.597666	0.0697776	-0.412132	-0.0461193	-0.646348	-0.137432	-0.312994	0.738733	-0.0951394	0.384115	0.256403	0.0635601	0.370361	0.045709	-0.292431	0.469209	-1.34797	0.162904	0.0051124	-0.929388	0.148483	-0.673369	0.804761	-0.104903	0.152027	-0.461701	0	2.2034	1.72796	1.78202	1.95074
BLCA	TCGA-GU-A767	TCGA-GU-A767-01A-11R-A32O-07	0.76468	0.458022	-0.287264	-1.98369	-0.693654	0.501918	0.0324845	NA	NA	NA	-0.00955235	0.0505501	0.0331497	0.344132	-0.0510108	0.0401369	0.526986	0.882515	-0.657522	0.742919	0.844026	0.190441	0.269424	1.52901	-0.732491	0.124517	-0.017117	-0.215652	0.558615	-0.153276	0.275313	0.407769	0.0386927	-0.208951	0.912053	1.31041	0.422754	0.151748	1.75472	-1.07482	-0.00782774	-0.320387	0	-0.693654	-1.01478	-0.458667	-0.633445
BLCA	TCGA-GU-AATO	TCGA-GU-AATO-01A-11R-A39I-07	-0.441951	-1.06007	-0.15717	-0.360985	-0.497627	0.261357	-0.453563	-0.824268	-1.01703	-0.378211	-0.575199	0.161445	0.317285	-0.852124	-0.106308	-0.531771	-0.41524	1.29127	-0.993147	0.285667	0.0977434	0.142995	1.39533	0.897401	-0.579512	-0.168916	0.0876611	0.160102	-1.07123	-0.23958	-0.69958	-0.949581	0.881322	-0.509669	0.652037	0.564788	0.420241	1.42427	0.987623	-0.937433	-0.168912	0.051663	0	-0.497627	0.352601	0.299142	0.182791
BLCA	TCGA-GU-AATP	TCGA-GU-AATP-01A-11R-A39I-07	-1.854	-2.27286	-0.0603343	-0.664288	0.306084	0.869404	0.591661	-0.8394	0.151913	-0.275763	1.12235	0.0971619	0.0598824	-0.240886	0.051485	0.581499	-1.14633	0.704791	0.00511066	-0.111405	-0.505953	-1.04646	-0.752631	0.545321	-0.559469	0.647517	0.0399134	-0.208793	-0.190789	-0.034809	0.933372	-1.75708	-0.597728	0.654639	-0.408003	-0.645087	-1.22125	-1.16102	0.549908	-1.0024	-0.168912	0.218764	1.2758	0.306084	0.715189	-0.216582	0.817682
BLCA	TCGA-GU-AATQ	TCGA-GU-AATQ-01A-11R-A39I-07	-3.74949	1.13205	-0.440286	0.53706	-1.35343	-0.593684	-0.799375	-0.224752	-0.399666	-0.291203	-0.220241	0.14693	-0.0403244	0.159714	0.206981	0.385269	1.35354	0.562524	0.283303	0.949031	0.348639	0.139586	2.35835	0.347161	0.821353	0.0699105	0.131866	-0.312991	0.202037	0.174062	0.642586	1.12465	-0.887652	0.960021	1.29056	0.779091	0.344952	2.4013	0.175028	0.714694	2.28357	2.77645	3.56056	-1.35343	0.0932903	-0.297604	-0.305773
BLCA	TCGA-GV-A3JV	TCGA-GV-A3JV-01A-11R-A220-07	0.304445	0.511965	-0.529115	0.586637	0.789208	-0.019488	0.843729	-2.42045	-2.00005	-1.29891	-0.672772	0.00163037	0.831769	0.181773	0.0736616	0.474325	-0.155823	0.879326	-0.40493	-1.00538	-0.219811	-0.422519	-1.61145	0.121615	0.241246	-0.231289	-0.078192	0.699017	0.284813	-0.0087825	0.780009	-0.601088	-0.0960961	0.12132	-1.39018	-0.202391	-0.33858	-2.14514	-0.0235317	-0.0282039	-0.168912	-0.357523	0	0.789208	0.680142	0.281924	0.00921096
BLCA	TCGA-GV-A3JW	TCGA-GV-A3JW-01A-11R-A20F-07	0.831947	0.162309	0.0347906	-0.804724	-1.21931	-1.06932	-0.529048	-0.0289948	-0.00544703	0.219587	-1.51225	-0.380742	-0.0125314	-0.19067	0.15289	-0.189405	0.878258	1.18197	-0.565633	0.413475	1.04896	-0.13222	0.305725	-0.361179	0.831657	-0.628637	-0.48941	-0.22563	-0.154372	0.0900302	-0.0745932	0.638798	0.781032	-0.0791872	0.434145	1.81956	-0.0996637	0.159619	-0.701995	0.564176	-0.168912	-0.461701	0	-1.21931	-1.30484	-0.0928912	-1.78635
BLCA	TCGA-GV-A3JX	TCGA-GV-A3JX-01A-11R-A20F-07	0.251289	-1.25615	0.387085	0.112877	0.657161	-0.715619	-0.37505	NA	NA	NA	-1.35375	0.11071	-0.0638637	-0.0326189	0.264813	1.18922	-0.165894	1.21859	0.271466	0.0253143	-0.00796918	0.246131	0.870215	-0.485313	0.3572	-0.538601	0.0193945	-0.342617	0.0265931	0.240668	1.92573	-0.674152	0.143035	1.05548	0.3562	0.374307	0.575848	0.915908	-0.77331	-0.124797	-0.168912	-0.375994	1.41863	0.657161	0.59806	0.287329	0.0455889
BLCA	TCGA-GV-A3JZ	TCGA-GV-A3JZ-01A-11R-A21D-07	-1.97108	-0.941886	0.273591	-0.0641772	1.72547	-0.0895928	0.167745	-1.56645	-0.503548	-1.39375	-0.27786	0.196506	-0.326639	-0.247192	0.297854	0.454992	0.592488	0.578552	0.142986	-0.222565	-0.339161	0.317731	0.106189	0.421646	1.33346	-0.000409396	0.13921	-0.661324	-0.266736	0.314166	0.787705	0.273037	-0.740792	0.865309	-0.360851	-0.434116	0.61222	-0.18779	0.351304	1.17106	-0.0647465	1.11801	0.453922	1.72547	-0.080684	-0.802554	0.221613
BLCA	TCGA-GV-A3QF	TCGA-GV-A3QF-01A-31R-A22U-07	-0.493207	0.0074962	-0.0923787	-0.804243	-0.978938	-1.04106	-0.744517	-1.06936	-0.929551	1.05706	-2.03898	-0.049244	0.19741	-0.0801683	-0.0301563	-1.40228	0.513986	1.35728	-1.34319	1.11818	0.685249	0.057027	2.20561	0.206825	0.489813	-0.860762	-0.110617	0.00430184	-0.0113497	-0.101202	-1.67184	0.291167	1.35404	-1.0115	1.64482	1.59512	0.132803	2.05728	0.0441434	0.232936	-0.168912	2.31989	0	-0.978938	-1.6115	2.49534	-1.36861
BLCA	TCGA-GV-A3QG	TCGA-GV-A3QG-01A-11R-A220-07	0.266927	-0.574711	0.532074	0.568801	1.04777	1.14664	1.34016	-1.52577	-2.2005	-2.11486	1.0408	0.350147	0.216425	0.152944	0.164357	0.371831	-0.553439	0.244281	0.301869	-0.206523	0.296365	-0.343954	-0.308752	-0.593108	0.466773	0.656053	0.309695	-0.0413174	0.267742	0.101802	0.532693	-0.959302	-1.35909	0.972448	-0.118002	0.753944	-0.282824	-0.723976	-0.918666	0.134423	0.286682	-0.461701	0.382292	1.04777	1.56211	1.7644	1.11967
BLCA	TCGA-GV-A3QH	TCGA-GV-A3QH-01A-11R-A220-07	0.978292	0.224759	0.449595	-0.539311	-0.251948	-1.76604	-1.70684	0.974617	0.782348	0.0748484	-2.25564	-0.330734	-0.24851	-0.546419	0.159026	-0.4441	0.816491	1.23043	-1.14967	-0.221913	-0.0721682	-0.2474	0.0338484	-0.657245	0.649908	-0.973259	-0.449636	-0.567701	-0.601146	0.123296	-0.345428	0.758392	0.858141	-0.668738	-0.238614	0.0671055	-0.11162	-0.13025	-1.07059	0.420573	2.20576	0.900853	2.80636	-0.251948	-1.09894	-0.410018	-1.92992
BLCA	TCGA-GV-A3QI	TCGA-GV-A3QI-01A-11R-A220-07	-0.699795	-0.612414	1.19468	1.40338	0.509424	-0.926388	-0.586795	-1.94577	-1.00837	-1.98893	-0.899632	-0.0916963	0.674388	-0.16297	0.388711	-0.260232	0.627568	-0.26433	0.400713	0.855401	0.791715	0.94538	0.371102	-0.111388	0.73123	-0.302008	-0.129249	0.488029	-0.139173	0.406204	-0.0906557	0.233175	-1.82162	1.37429	1.60559	1.87987	1.6263	0.179769	-0.315607	0.476443	-0.0787304	-0.461701	0	0.509424	-1.1815	-1.55645	-1.31572
BLCA	TCGA-GV-A3QK	TCGA-GV-A3QK-01B-11R-A23N-07	-1.09927	-0.985664	-0.357601	0.433993	0.245146	-0.688789	-0.0167155	-1.32722	-0.636565	-0.962243	-1.24002	-0.0403612	0.386487	-0.360664	0.061626	-0.280865	0.538951	1.47102	-0.645084	-0.420361	0.393917	0.0576687	-1.06126	0.475935	0.0542084	-0.50463	-0.122688	0.178683	-0.39369	-0.0220248	-0.245527	0.336581	1.44315	-0.161534	-0.316712	0.887866	0.268526	-1.40428	0.461843	-0.219079	-0.168912	-0.461701	0	0.245146	0.57745	0.874599	-0.109413
BLCA	TCGA-GV-A40E	TCGA-GV-A40E-01A-12R-A23N-07	-0.928604	1.14211	0.890026	-0.00352925	1.69054	-0.365176	-0.423787	0.176494	1.12045	1.56057	0.663308	0.315549	0.785647	-0.15915	0.25293	-0.334023	0.900505	0.487038	-0.434155	-0.126814	-1.04546	-0.427995	0.616476	0.138223	0.217115	0.445828	0.281639	0.63982	-0.263567	0.240787	-0.452045	0.725204	-0.805534	0.19173	-0.178915	-1.52557	-0.340687	0.337104	0.0504994	0.221289	0.252251	-0.348463	2.83682	1.69054	0.457534	-0.178984	1.57635
BLCA	TCGA-GV-A40G	TCGA-GV-A40G-01A-11R-A23N-07	0.0721256	-2.66152	-0.268014	-0.59695	-0.800974	-0.447784	-0.307917	-0.581133	-0.673474	-1.34314	-1.38184	-0.114981	0.155303	-0.227291	0.219653	-0.937755	0.63502	1.27168	-1.0709	-0.573377	-0.156032	0.355209	0.50132	0.291571	0.685125	-0.509484	-0.197078	-0.0982585	-0.151736	0.195514	-1.04408	0.332327	0.847934	-0.617616	-0.653711	0.272645	0.658598	0.175795	0.225511	0.492831	0.0926669	0.0950514	0	-0.800974	-1.87672	-1.51756	-1.41114
BLCA	TCGA-GV-A6ZA	TCGA-GV-A6ZA-01A-12R-A33J-07	0.461871	0.370475	0.0161727	-0.820539	-0.526432	-0.643805	-0.961401	-1.59048	-1.39169	-1.69274	-1.00153	-0.278042	0.337141	-0.724085	0.130988	-0.648869	1.07988	1.25719	-1.08056	0.456849	0.602215	0.00650931	0.709681	0.978682	0.564717	-0.327871	-0.3765	0.132234	-0.833155	0.108499	-0.724138	1.1428	0.947804	-0.618303	0.639745	1.11604	0.157881	0.601517	1.03992	0.681301	1.43316	-0.159382	0	-0.526432	0.713546	0.25887	-0.676218
BLCA	TCGA-H4-A2HO	TCGA-H4-A2HO-01A-11R-A180-07	0.0550398	-1.86489	-2.67439	-0.623407	-1.19775	0.361521	0.664787	-0.151951	-0.0502057	1.09971	-0.86325	0.0155783	0.33956	0.0356687	-0.162279	-0.117068	0.315812	1.32267	0.0155902	0.63273	1.81693	0.753531	-0.253244	1.01392	0.186691	-0.347735	-0.0462182	0.0524175	0.200532	-0.365051	0.0634012	-0.0951244	0.676327	0.723085	0.762823	3.05367	1.14827	-0.380005	1.1043	-0.382726	0.727157	1.7142	1.40253	-1.19775	0.0387114	0.464462	-0.688094
BLCA	TCGA-H4-A2HQ	TCGA-H4-A2HQ-01A-11R-A180-07	0.224439	0.282288	0.241569	-0.244133	-0.110257	-1.06788	-0.388437	0.528498	-0.302529	0.770224	-0.741438	0.075423	0.1807	-0.106514	0.243709	0.285319	0.386808	1.02455	-0.436062	0.425273	-0.193216	0.0228691	2.27999	-0.180505	1.58424	-0.208993	0.0396777	-0.113088	-0.0515738	0.210211	0.665843	0.0128738	0.0987772	0.132332	0.529669	-0.26577	0.0748897	2.67749	-0.479949	1.49854	1.68742	1.78724	2.88956	-0.110257	-0.369736	-0.83741	-0.872318
BLCA	TCGA-HQ-A2OE	TCGA-HQ-A2OE-01A-11R-A206-07	-0.514453	-1.08506	1.27627	0.642858	0.775929	-1.41515	-1.02361	-0.768169	-1.08903	-0.492506	-1.81128	-0.0157289	0.297605	-0.234651	0.232352	0.297227	1.21392	1.20003	-0.70391	0.517209	0.658475	-0.26248	-0.674194	-0.314705	1.08743	-0.757623	-0.0711097	0.071628	-0.277144	0.219392	0.66497	1.0229	0.79803	-0.235091	0.899094	1.26861	-0.0409585	-0.806602	-0.594782	0.904593	1.59753	1.43524	0	0.775929	-0.388237	-0.721907	-1.12494
BLCA	TCGA-HQ-A2OF	TCGA-HQ-A2OF-01A-11R-A26T-07	0.210167	0.955018	0.48966	-0.681896	-0.998869	-1.22414	-0.638405	-1.03977	-0.885227	-0.741068	-2.33043	-0.426234	-0.0856737	-0.552762	0.134585	-0.205946	1.03838	1.16539	-0.460848	-0.041901	0.161037	0.972039	0.05872	-0.557964	1.05647	-1.05827	-0.545997	-0.395859	-0.622496	0.094445	-2.70801e-05	0.748083	0.514706	0.346705	0.426707	0.484464	1.63253	0.0949245	-0.944172	0.520334	-0.168912	-0.346695	0	-0.998869	-1.30761	-1.85181	-1.52302
BLCA	TCGA-HQ-A5ND	TCGA-HQ-A5ND-01A-11R-A26T-07	-0.892682	0.114574	0.827198	0.637179	-0.736326	-1.46314	-0.220766	0.473112	1.01947	1.46214	-1.20278	0.241453	-0.172466	-0.29822	0.265152	-0.875878	0.976737	0.925949	-0.949034	0.889549	0.0999049	0.865043	1.87809	0.113106	1.62402	-0.465021	0.23428	-0.468524	-0.39381	0.280667	-1.05327	0.789331	0.235295	-0.442408	1.29271	0.109927	1.2312	1.98167	-0.10136	1.70379	-0.168912	1.83392	0	-0.736326	-0.798346	-0.927086	-0.276802
BLCA	TCGA-HQ-A5NE	TCGA-HQ-A5NE-01A-12R-A28M-07	0.0650174	0.547182	0.356783	1.30852	1.09894	0.064971	0.484163	-1.49258	-1.38659	-1.23407	0.491603	0.445039	0.490612	0.283154	0.168994	0.316401	-0.497409	1.10615	0.0354809	-0.368656	-0.320019	-0.462551	0.54077	-0.592038	0.376123	0.3609	0.458198	0.313659	0.361849	0.114476	0.549595	-1.19941	0.510078	0.722294	-0.590558	-0.471747	-0.500234	0.315455	-0.988634	0.0576875	0.621688	-0.183214	0	1.09894	-0.550042	-0.68429	1.24444
BLCA	TCGA-K4-A3WS	TCGA-K4-A3WS-01A-11R-A22U-07	-1.48467	-0.140053	-0.292509	0.160246	0.221038	1.06217	1.86585	-1.64053	-1.219	-0.996405	1.39825	0.114705	0.0975237	0.182566	0.0958536	0.950071	-1.6565	0.127624	0.625067	0.18319	0.388643	-0.749394	-0.489913	-0.552617	-0.21268	0.868921	0.0188065	-0.159559	0.303585	-0.00240397	1.43591	-2.1134	-1.96262	1.3016	0.110751	0.803163	-0.947117	-0.944954	-0.886234	-0.711224	-0.168912	1.46888	0	0.221038	0.88998	0.833326	0.543086
BLCA	TCGA-K4-A3WU	TCGA-K4-A3WU-01B-11R-A23N-07	-0.107839	-0.35336	-2.19105	-0.177859	0.395764	0.6857	1.19382	0.666991	1.57053	0.837497	-0.159391	0.250587	0.376299	0.213679	0.0967883	1.09615	-1.49867	0.605281	1.43354	0.257907	0.959795	-0.207978	-0.521678	0.00399867	-0.852365	0.00928832	0.176931	0.130283	0.299177	-0.032854	1.6997	-1.79154	-1.21164	2.36627	0.270654	1.74023	-0.202097	-0.845381	-0.213975	-1.32263	1.80476	1.07302	0.160861	0.395764	0.593429	1.27166	0.27071
BLCA	TCGA-K4-A3WV	TCGA-K4-A3WV-01A-11R-A22U-07	0.609609	-0.836462	0.000538304	-0.169008	0.905731	-1.46908	-0.809501	-0.641235	1.23276	-1.08697	-0.440517	0.172063	0.313337	0.168638	0.0538488	0.124694	0.295223	0.0943257	-0.361617	0.285246	-0.452448	-1.0822	0.190471	-0.461242	0.441818	-0.113605	0.160778	0.0867524	0.241131	-0.0132054	0.260067	0.103122	-1.1478	0.286654	0.651552	-0.382733	-1.28899	0.0557338	-0.73678	0.117871	-0.168912	2.2518	3.27497	0.905731	-0.831476	-2.27269	-0.678563
BLCA	TCGA-K4-A4AB	TCGA-K4-A4AB-01B-12R-A28M-07	-1.81721	0.399037	-2.33381	0.664494	-0.00787564	0.114975	0.858843	0.353439	-0.729207	-0.199226	0.312543	0.296781	0.251954	0.249953	-0.300007	0.450707	-1.44728	1.34829	-0.223489	0.51285	0.494343	-1.21157	0.278774	-0.406713	-0.923217	0.304479	0.268699	0.0337541	0.328394	-0.574778	0.780407	-1.93059	0.589998	0.412222	0.507357	0.788565	-1.66314	-0.0343096	-0.736024	-1.48062	-0.168912	-0.1627	0.598496	-0.00787564	-0.422769	-0.348253	-0.158262
BLCA	TCGA-K4-A4AC	TCGA-K4-A4AC-01A-21R-A26T-07	0.35139	1.57463	0.928764	1.95551	0.0813469	-0.634135	-1.15877	-1.63161	-0.887345	-0.546533	0.715967	-0.022028	0.0315799	-0.0987175	0.10162	-0.637892	0.995609	0.341322	-1.43461	-0.377099	-0.444828	0.0211403	0.0675908	-0.0650933	0.826369	0.524595	-0.0955813	-0.146155	-0.182916	0.0573577	-0.784741	0.817041	-0.99511	-1.10753	-0.567406	-0.666505	0.176823	-0.372804	-0.309804	0.821708	-0.168912	-0.314878	0	0.0813469	0.529655	-0.176024	0.470273
BLCA	TCGA-K4-A54R	TCGA-K4-A54R-01A-11R-A26T-07	-0.142018	-0.00130292	-0.57347	1.18297	1.65634	0.860671	-0.0320352	-1.36826	0.764944	-0.591547	0.312184	0.317754	0.235551	-0.214953	0.0672145	-0.539299	-0.281933	0.871808	-0.749378	-0.0375082	-0.355321	0.160067	0.0683165	-0.220779	0.454675	0.22733	0.287085	0.0377232	-0.291133	2.88371e-05	-0.713635	-0.817001	-0.100271	-0.362263	0.00129434	-0.603335	0.446615	-0.194732	-0.437257	0.321257	-0.168912	-0.461701	0	1.65634	1.15314	1.03708	1.06216
BLCA	TCGA-K4-A5RH	TCGA-K4-A5RH-01A-11R-A30C-07	0.92756	0.0790146	0.351456	0.549849	2.06597	2.30867	0.862913	-1.61136	0.457345	-1.37613	0.915714	0.089896	0.0689664	-0.473596	0.230013	0.114199	-1.07311	-1.62806	-0.0169281	-0.65141	-0.77763	0.0780887	-0.114714	-0.170716	-0.0377347	0.624161	-0.00796893	-0.274641	-0.548457	0.173628	0.271726	-1.45894	-2.89789	0.553077	-0.845505	-1.16975	0.251445	-0.471193	-0.38218	-0.28319	-0.0862115	0.100884	0	2.06597	1.91537	1.61075	1.83958
BLCA	TCGA-K4-A5RI	TCGA-K4-A5RI-01A-11R-A28M-07	0.112602	0.804187	0.112397	0.914475	-0.420392	-0.478086	0.254772	-1.0824	-1.02519	-0.618816	-0.137998	0.226671	-0.00869956	-0.0524324	0.171414	0.377454	1.14934	0.605064	0.733458	1.01995	0.481733	0.775248	2.60896	0.479943	1.16777	0.102327	0.210408	-0.280134	-0.044323	0.131681	0.712031	0.897011	-0.925208	1.49267	1.48681	1.22886	1.08305	2.83674	0.449483	0.945961	0.268336	2.04081	2.66427	-0.420392	-0.659325	0.993934	-0.414799
BLCA	TCGA-K4-A5RJ	TCGA-K4-A5RJ-01A-11R-A28M-07	-1.35193	-0.488658	0.180329	0.732884	1.00944	1.85906	0.617871	-1.59167	-1.84127	-1.50116	-0.510318	-0.103164	-0.223421	-0.443551	0.211053	-1.28831	0.530287	-1.26818	-0.0349837	1.24984	1.70001	3.35182	2.38936	1.19338	0.710278	-0.065338	-0.201151	-0.583991	-0.547581	0.162917	-1.81552	0.216097	-2.71017	0.550603	1.58997	2.84929	4.87149	2.46551	1.42007	0.507912	0.121037	0.202618	0	1.00944	2.39911	1.77432	1.80352
BLCA	TCGA-K4-A6FZ	TCGA-K4-A6FZ-01A-11R-A31N-07	-0.407845	0.841084	-0.409818	2.14251	1.77596	-0.502161	-0.320616	-1.2595	0.529883	-0.0266432	-0.232157	0.434921	0.465932	0.0689352	0.0640608	-0.0641708	0.508779	1.72426	-0.16502	0.41335	-0.13443	-0.175482	-0.129764	-0.437841	0.0696976	0.00846957	0.441854	0.299228	0.0938583	-0.0396029	0.0496645	0.0417286	1.61755	0.395579	0.555758	-0.151792	-0.113211	-0.481583	-0.772138	-0.316283	-0.0556999	-0.461701	0	1.77596	0.26781	0.193472	0.716173
BLCA	TCGA-K4-A6MB	TCGA-K4-A6MB-01A-11R-A31N-07	-1.53367	-1.42843	0.711622	-0.905455	-0.611564	0.139571	0.888707	-0.579439	-0.140699	-0.810422	-0.192675	-0.0492204	0.0563966	-0.0460594	0.156279	0.842268	-0.393746	1.0394	0.0762644	-0.411293	0.410217	-0.261807	0.0288292	0.190782	0.685684	-0.0145849	-0.141247	-0.179134	-0.0318601	0.11372	1.33506	-1.04121	0.21229	0.72268	-0.572264	0.654232	-0.196016	-0.275005	0.0445985	0.415652	0.849762	-0.0754071	1.224	-0.611564	-0.62771	-0.84042	-0.334796
BLCA	TCGA-K4-A83P	TCGA-K4-A83P-01A-11R-A352-07	0.0878008	0.742955	-0.877374	0.856192	0.620068	1.29317	1.47465	-1.2414	-1.68791	-0.991755	1.12891	0.393445	0.473266	0.215229	0.0413333	0.779402	-1.19765	0.314052	1.05946	0.709754	0.550711	0.0169396	1.2563	0.363081	-1.6363	0.712726	0.332948	0.287721	0.279253	-0.0943224	1.15333	-1.55182	-1.4303	1.90158	0.888465	1.01796	0.197516	1.15977	0.241516	-1.93077	2.76227	0.37869	0	0.620068	1.62622	1.62946	0.8376
BLCA	TCGA-K4-AAQO	TCGA-K4-AAQO-01A-11R-A38B-07	-0.139268	-0.0162357	0.704836	-0.136531	-0.481222	0.83671	2.03571	-1.63146	-1.09512	-0.589705	0.0130613	0.0855097	0.172174	-0.0756248	0.140754	0.706994	-0.895003	0.24471	0.699548	0.950447	0.985731	0.606603	-0.392159	0.164113	0.0750076	0.18622	-0.0121066	-0.0633618	-0.0251191	0.0625198	1.05261	-1.29464	-1.65388	1.4157	1.38019	1.76558	0.991744	-0.547308	0.023296	-0.379373	1.81069	0.308204	2.84716	-0.481222	0.260529	0.453586	0.299817
BLCA	TCGA-KQ-A41N	TCGA-KQ-A41N-01A-11R-A33J-07	-1.08787	-0.0891721	-0.19975	-1.38398	-0.809428	-0.75062	-0.227863	-0.350198	1.22806	0.386766	-0.758018	-0.147748	0.151939	-0.192437	-0.0714937	-0.0897028	0.316793	1.17599	-1.36382	-0.186591	-0.0778342	-0.902712	-0.00608202	1.10298	0.0411776	-0.188149	-0.266434	-0.0600829	-0.111332	-0.180047	0.0546676	0.149971	0.817938	-1.0169	-0.202636	-0.25368	-1.04798	-0.232879	1.19762	-0.139092	0.660468	1.74253	0.278176	-0.809428	-2.0707	-1.10754	-0.749789
BLCA	TCGA-KQ-A41O	TCGA-KQ-A41O-01A-12R-A352-07	-0.023576	-0.617858	-0.186154	-0.597868	-1.50078	-2.31868	-1.65656	-0.892872	-1.49428	-0.517935	-2.69117	-0.496991	0.168049	-0.425269	0.0655116	-1.48381	1.1735	1.0692	-2.44755	-0.944983	-0.405226	-0.892562	-0.346431	0.174826	0.543062	-1.12187	-0.607838	-0.0511918	-0.458578	0.0176628	-1.86115	1.24309	0.755236	-2.14162	-0.847575	-0.186747	-1.04049	-0.56842	0.048678	0.388601	2.10891	1.3625	0.273084	-1.50078	-2.0707	-1.43191	-1.55676
BLCA	TCGA-KQ-A41P	TCGA-KQ-A41P-01A-12R-A33J-07	0.656892	-0.253485	-0.513561	-1.73646	-1.04803	0.466496	-0.0366059	-1.78654	-1.49544	-1.73854	0.420201	0.145266	0.196482	0.186393	-0.031326	0.555186	0.305908	1.09779	0.173179	1.25146	0.807235	1.28022	1.33229	1.74925	-0.705175	0.420221	0.0959684	-0.0485893	0.310691	-0.14351	0.880626	0.0276184	0.302229	0.966425	1.777	1.43094	2.05213	1.31064	2.02019	-1.21708	2.32179	1.29703	3.09797	-1.04803	0.138006	-0.279799	-0.0248836
BLCA	TCGA-KQ-A41Q	TCGA-KQ-A41Q-01A-11R-A33J-07	0.706551	-2.74289	0.701936	-0.724423	-0.485651	-0.817294	0.237239	-1.87872	-1.41143	-1.18314	-0.890252	-0.202509	0.623262	-0.360956	0.226716	-0.509869	0.848302	1.01848	-1.12781	-0.34552	0.0603622	-0.639446	0.731599	0.0539303	1.06149	-0.331735	-0.332087	0.466817	-0.410713	0.212233	-0.647134	0.83219	0.633633	-0.628334	0.0425512	0.664617	-0.8076	0.826124	-0.164244	1.03073	0.261685	0.178	2.31187	-0.485651	-1.29912	-1.47429	-1.11796
BLCA	TCGA-KQ-A41R	TCGA-KQ-A41R-01A-21R-A352-07	-0.293798	-0.787519	0.206447	-1.76959	-1.02075	-0.278144	-0.408406	0.925007	-0.536198	-0.50561	-1.20511	-0.330204	0.230841	0.102332	-0.162813	-0.43267	0.411468	1.37369	-1.46547	-0.636693	0.894273	-0.658402	-1.74592	1.22661	-0.465847	-0.43035	-0.404712	0.0131817	0.223625	-0.297923	-0.367286	0.269253	1.1771	-1.00087	-0.538271	1.85848	-0.618719	-2.1386	1.38267	-0.785585	0.768884	-0.461701	0	-1.02075	-0.339954	-0.155387	-0.762504
BLCA	TCGA-KQ-A41S	TCGA-KQ-A41S-01A-12R-A33J-07	-1.66484	-0.220921	0.441701	0.135699	-0.610908	0.555879	1.21236	-0.834894	-0.568583	-0.799443	0.024284	0.12874	0.12405	-0.121454	0.177653	0.260912	-0.986363	1.1808	0.154758	-0.632686	-0.295914	0.0202004	-0.253495	0.0435587	0.142531	0.221588	0.0560088	-0.116287	-0.050322	0.121987	0.509426	-1.55504	0.101506	0.830072	-0.935508	-0.331111	0.206665	-0.561566	-0.0822993	-0.284141	0.0769278	-0.461701	0.208029	-0.610908	-0.175043	-0.709648	-0.4159
BLCA	TCGA-LC-A66R	TCGA-LC-A66R-01A-41R-A30C-07	-1.78093	0.669695	0.669521	0.806253	1.64415	0.821765	0.128345	-1.66266	-0.673934	-0.170045	-0.187525	0.278476	0.20995	0.24437	0.300227	0.0495867	0.205959	0.582786	-0.565474	-0.790197	-0.784449	-0.192858	-0.339825	-0.0386627	1.22041	-0.0164265	0.259995	-0.0142045	0.33338	0.298532	0.150839	-0.141129	-0.542145	-0.0453865	-1.10519	-1.20305	0.0200867	-0.704771	-0.245427	1.17601	-0.168912	-0.461701	0	1.64415	1.12429	0.979131	1.45365
BLCA	TCGA-LT-A5Z6	TCGA-LT-A5Z6-01A-11R-A28M-07	-1.95153	-2.53069	0.292222	-1.12369	0.320059	-0.814972	-0.683572	0.607215	-0.396735	0.28751	-1.60775	-0.391667	-0.0164572	-0.557574	0.28744	-0.47027	0.668835	0.819688	-0.901188	-0.182214	0.0286744	0.476461	0.424782	0.108933	0.310828	-0.659176	-0.520668	-0.298707	-0.608946	0.272999	-0.440563	0.280423	-0.0612847	-0.479578	0.116283	0.401806	0.882597	0.377193	0.00681805	0.0977566	-0.168912	-0.461701	0	0.320059	0.631008	-0.180481	-0.346382
BLCA	TCGA-LT-A8JT	TCGA-LT-A8JT-01A-11R-A36F-07	0.5759	0.668945	-1.65403	-0.358613	-0.838744	-1.12463	-1.07578	-0.417343	0.267901	-0.259008	-1.47398	-0.140709	0.334557	-0.400605	-0.139187	-0.577682	0.941093	1.7719	-1.29902	-0.898689	-0.196473	-0.466585	-0.232515	0.0155179	0.00977579	-0.57403	-0.23742	0.116428	-0.435993	-0.314172	-0.640647	0.842822	2.30256	-0.919818	-0.85369	-0.114705	-0.543345	-0.508413	-0.194657	-0.454251	-0.168912	-0.461701	0	-0.838744	0.232879	-0.067006	-0.971193
BLCA	TCGA-MV-A51V	TCGA-MV-A51V-01A-11R-A26T-07	-0.610537	-1.26037	-0.597607	-0.981029	-0.768051	0.00404633	-0.117548	0.136464	-0.474328	0.636265	-0.894004	0.05526	0.421746	-0.165277	0.00530794	-0.0302318	0.0392355	1.45118	-0.0790112	0.964745	0.97379	0.150527	0.925703	0.293548	-0.504373	-0.324601	-0.00437568	0.173046	-0.0692104	-0.0977427	0.254767	-0.289766	1.12769	0.630297	1.3795	1.84109	0.348373	0.91757	0.190818	-0.994797	2.74958	1.74617	0	-0.768051	-0.665033	-0.840967	-0.968739
BLCA	TCGA-PQ-A6FI	TCGA-PQ-A6FI-01A-11R-A31N-07	-0.605026	1.59945	1.33814	0.844452	0.256387	0.48899	-1.22669	-0.740298	0.703286	-0.270295	-0.0130663	0.144392	-0.183688	0.199757	0.326714	-0.987185	1.27481	0.215965	-1.41552	-0.0598684	-1.24784	0.520812	0.883085	0.157981	1.24159	0.108807	0.115911	-0.461384	0.248091	0.344543	-1.24806	1.17058	-1.01009	-1.04917	0.161122	-1.70189	0.933754	0.794118	0.0255403	1.38071	-0.0533157	2.14173	0	0.256387	0.243605	-0.297675	-0.148156
BLCA	TCGA-PQ-A6FN	TCGA-PQ-A6FN-01A-11R-A31N-07	-0.522197	1.24865	0.260633	0.241658	-0.0352901	0.0531025	-0.622025	NA	NA	NA	0.412875	0.151607	-0.00793841	0.25142	-0.041518	-0.559444	1.18056	0.416734	-1.41813	-0.152288	-0.251714	0.586191	0.628761	1.38862	0.608458	0.334065	0.101206	-0.192514	0.310023	-0.131946	-0.649097	1.06358	-0.830802	-1.07452	-0.324531	-0.353844	1.06457	0.357637	1.59173	0.635825	1.47123	-0.461701	0	-0.0352901	-0.015292	-0.418635	-0.0735368
BLCA	TCGA-R3-A69X	TCGA-R3-A69X-01A-22R-A30C-07	-0.299424	-0.443184	0.583558	1.38695	-0.124694	0.480146	1.28748	-0.386075	-0.0861444	0.0660502	0.0223358	0.089777	0.465822	0.03238	0.079648	0.222307	-0.823882	0.775127	0.593764	0.612739	0.726357	-0.0387407	0.804131	-0.386797	-0.241631	0.193011	0.0110644	0.264052	0.0678529	-0.00220729	0.52651	-1.42346	-0.728075	1.33351	0.774884	1.218	0.0341046	0.668219	-0.717046	-0.620578	1.79936	1.11963	0	-0.124694	0.58172	0.82415	0.510335
BLCA	TCGA-S5-A6DX	TCGA-S5-A6DX-01A-11R-A31N-07	-0.236422	-1.71638	-0.0943845	-1.24063	-0.967922	0.534491	0.145374	-0.949527	-1.79224	-0.811716	-0.217145	-0.03128	0.2909	-0.107928	-0.151746	-0.158485	0.268262	0.837453	-0.545801	0.369953	0.675994	-0.598277	-0.517778	2.29374	-1.22369	0.0377516	-0.123944	0.0669456	-0.0820628	-0.292337	-0.0700553	0.152594	0.179455	0.0617408	0.304947	1.2456	-0.449052	-1.04412	2.83124	-1.38266	2.89072	2.04171	0	-0.967922	1.6273	1.41823	0.808686
BLCA	TCGA-S5-AA26	TCGA-S5-AA26-01A-11R-A38B-07	0.018662	-0.616794	0.221666	-0.0436659	-0.910008	-0.927131	-0.732614	0.170107	-0.375538	-0.601418	-1.50818	0.0338975	0.417314	0.11504	0.103791	-0.145928	0.806594	1.15294	-1.3387	-0.0833808	0.0207441	-0.731105	-1.02475	0.639763	-0.106649	-0.624264	-0.00704938	0.255328	0.198483	0.0627582	-0.0990645	0.723686	0.820358	-0.906405	0.468027	0.524968	-0.757816	-1.18433	0.668347	-0.439904	0.349981	1.67919	0	-0.910008	-1.1409	-0.825764	-1.25492
BLCA	TCGA-SY-A9G0	TCGA-SY-A9G0-01A-12R-A38B-07	0.0848056	0.73	-1.66554	0.432964	-0.0142013	1.10924	2.38487	NA	NA	NA	1.09001	0.270798	0.353323	0.406867	-0.0794072	0.76292	-1.41165	-0.370886	0.860086	-0.479449	0.20859	-0.312107	-0.611098	-0.602605	-0.462925	0.749756	0.205922	0.0570103	0.580222	-0.265649	1.20223	-1.6764	-2.30857	1.67514	-0.456636	0.685753	-0.30464	-0.908995	-0.933917	-0.992974	-0.168912	-0.178992	0.28366	-0.0142013	0.112197	0.394266	0.237628
BLCA	TCGA-SY-A9G5	TCGA-SY-A9G5-01A-11R-A38B-07	-0.331213	0.187744	0.377594	-0.222118	0.944812	1.09656	0.699715	NA	NA	NA	0.858815	0.170492	0.506518	-0.0890296	0.0571544	0.439488	-1.28485	1.05389	-0.711119	-0.379675	-0.624804	-1.0907	-0.382077	-0.0885657	-0.705863	0.536247	0.0998236	0.30779	-0.109835	-0.030634	0.643158	-2.02845	0.268036	-0.271255	-0.54215	-0.974972	-1.31684	-0.615727	-0.329552	-1.16316	-0.168912	-0.461701	0	0.944812	1.18821	1.25926	1.1481
BLCA	TCGA-UY-A78K	TCGA-UY-A78K-01A-11R-A33J-07	-0.300148	-0.427062	0.870771	-0.949072	0.278132	0.60745	-0.515619	0.634906	-0.316148	-0.415538	-0.479006	-0.212846	0.0597248	-0.675513	0.21123	-0.239961	0.530901	1.0244	-0.263293	-0.0298594	0.747993	0.646297	0.778167	0.648014	0.439525	-0.108299	-0.352846	-0.155328	-0.817921	0.183776	-0.196594	0.348623	0.208587	0.281558	0.124629	1.42568	1.15696	0.580496	0.636263	0.343544	2.25761	-0.461701	0.544006	0.278132	1.43127	1.623	0.443768
BLCA	TCGA-UY-A78L	TCGA-UY-A78L-01A-12R-A33J-07	0.412951	-0.373927	1.16239	1.16954	1.08442	0.152537	-0.254197	1.021	-0.0242651	-0.247019	0.320262	0.474688	-0.243886	-0.467859	0.1971	-0.757644	1.00626	0.780818	-0.739679	0.194661	-0.335318	1.04722	1.81124	0.59898	1.0366	0.252624	0.458122	-0.510913	-0.557968	0.179984	-1.06438	0.770079	-0.309339	-0.230401	0.416257	-0.352245	1.58407	1.67648	0.524792	0.931038	1.12532	1.37617	0	1.08442	-0.750987	-1.04752	0.723581
BLCA	TCGA-UY-A78M	TCGA-UY-A78M-01A-21R-A352-07	0.356688	0.281426	0.327598	-1.67295	-0.979268	0.0932332	-0.870081	-0.608936	-0.667095	-0.649053	0.440336	0.0556172	-0.0594755	-0.108149	-0.132938	-0.529448	0.632938	1.04745	-1.48327	-0.404307	-0.338537	0.467469	0.377517	1.35769	-0.132792	0.353898	0.00245905	-0.287646	-0.117485	-0.249018	-0.703803	0.629654	0.582031	-1.20218	-0.259411	-0.446226	0.80837	0.218573	1.45221	-0.373603	2.23454	-0.330887	0	-0.979268	-1.61171	-0.902388	-0.26953
BLCA	TCGA-UY-A78N	TCGA-UY-A78N-01A-12R-A33J-07	-1.46418	-0.444901	1.45093	-0.893333	-0.699448	-0.681626	-0.131713	-1.10212	-0.773286	-0.501298	-0.67693	-0.115065	0.289217	-0.283161	0.372734	0.444041	1.09204	-0.0391672	-0.513036	0.679594	0.545684	0.268479	0.262232	0.965282	1.2309	-0.198537	-0.236202	0.0948823	-0.284471	0.411972	0.840606	1.01172	-1.91508	0.130526	1.33215	1.22894	0.664916	0.30338	1.07315	1.09702	-0.0432347	-0.461701	0	-0.699448	-0.835915	-0.891344	-1.11991
BLCA	TCGA-UY-A78O	TCGA-UY-A78O-01A-12R-A33J-07	0.194799	-0.45756	-0.747432	-1.46728	0.0011525	-0.320997	-0.831118	-1.21133	-1.31254	-0.609873	-0.54653	0.075654	0.303168	-0.186074	-0.0849601	-0.199458	0.495766	1.479	-0.930084	0.33704	0.437576	0.0587579	0.497057	1.2465	-0.280944	-0.167098	0.0225418	0.0974566	-0.122439	-0.210644	-0.110662	0.269643	1.5284	-0.473963	0.762375	0.965252	0.277441	0.456875	1.42583	-0.67813	-0.168912	0.0389737	0	0.0011525	-0.339927	-0.398647	-0.817162
BLCA	TCGA-UY-A78P	TCGA-UY-A78P-01A-12R-A36F-07	-1.47717	0.758591	0.347838	1.14169	0.730385	0.924802	-0.00604507	NA	NA	NA	0.402008	0.401458	0.276579	0.107989	0.169777	-0.00506632	1.14092	1.2954	0.179817	0.697062	0.143228	0.527343	0.768828	1.19848	0.136438	0.293573	0.413709	0.0611609	0.164898	0.131517	0.120949	1.02536	0.656644	0.889085	1.07647	0.521831	0.854669	0.622746	1.37648	0.0488594	3.25458	0.399651	0	0.730385	1.09943	0.891144	0.907202
BLCA	TCGA-UY-A8OB	TCGA-UY-A8OB-01A-12R-A42T-07	-3.73553	1.26968	-0.0432957	0.97665	1.37213	-0.954869	-1.48254	-2.01995	-1.00547	-0.970547	-0.664409	0.251821	0.219391	-0.537493	0.0199438	-1.55189	1.31266	0.542839	-2.25571	-0.0828639	-1.05681	-0.984323	0.840658	0.0711271	0.509187	-0.232308	0.225565	0.0916213	-0.765579	-0.0485457	-2.1264	1.2941	-0.311199	-2.04513	-0.0998127	-1.63395	-0.906054	0.596925	-0.0820872	0.551656	-0.168912	-0.461701	0	1.37213	0.319363	-0.162038	1.85036
BLCA	TCGA-UY-A8OC	TCGA-UY-A8OC-01A-11R-A36F-07	0.117529	-0.0539129	-0.128082	1.30859	0.169574	1.263	0.699925	-2.36488	-1.43684	-1.75795	2.09171	0.611891	0.284798	0.842762	-0.028436	-0.259154	-0.620868	0.116521	-0.906706	-0.45557	-1.17267	-0.866419	0.127131	0.481726	0.0981617	1.21803	0.641159	0.139477	1.09668	-0.125174	-0.292696	-1.13114	-1.3099	-0.421188	-0.586478	-1.80974	-1.05514	-0.225071	0.450064	-0.229125	-0.168912	-0.461701	0	0.169574	-1.25732	-1.01013	0.412549
BLCA	TCGA-UY-A8OD	TCGA-UY-A8OD-01A-11R-A36F-07	-0.742347	-0.480878	-0.253618	-0.255301	-0.594662	1.00696	1.62024	-1.04119	-0.5073	0.992217	1.01947	0.26989	0.104853	0.239237	0.0104152	0.149607	-0.591941	0.554727	0.242443	-0.464196	0.136095	-0.822192	-0.41659	0.295729	-0.748785	0.697601	0.211036	-0.13	0.413912	-0.10834	0.256616	-0.965475	-0.80037	0.978685	-0.429815	0.36965	-0.920753	-0.799762	0.213779	-1.14212	0.138692	-0.461701	0	-0.594662	0.187329	0.653678	0.0486893
BLCA	TCGA-UY-A9PA	TCGA-UY-A9PA-01A-11R-A38B-07	0.216771	0.602868	-0.508754	0.543841	1.33424	-1.64804	-1.10639	NA	NA	NA	-0.878696	0.183631	0.562817	-0.0503262	-0.112453	-0.315769	0.523843	2.11031	-0.921475	-0.0736921	-0.309596	-0.459587	0.0999458	-0.576215	-0.534506	-0.315608	0.139211	0.348399	-0.0743792	-0.285674	-0.30176	0.0939	2.81969	-0.524652	-0.123771	-0.431899	-0.530934	-0.231978	-0.941179	-1.02522	-0.168912	-0.300593	0	1.33424	0.466149	0.253762	0.522202
BLCA	TCGA-UY-A9PB	TCGA-UY-A9PB-01A-11R-A38B-07	0.524931	0.630676	0.197244	0.396536	1.68215	0.919975	0.402502	NA	NA	NA	1.43739	0.403559	0.185846	0.0249178	0.13643	0.0761524	-0.333733	-0.0124311	-0.322345	0.448928	-0.421743	-0.487087	-0.0755226	-0.245178	-0.174607	0.840187	0.367203	-0.0167422	0.0434332	0.0628523	0.146699	-0.844856	-1.88432	0.282949	0.753377	-0.315838	-0.441621	-0.42093	-0.527955	-0.422442	1.63619	1.3863	0	1.68215	1.47617	1.39999	1.63822
BLCA	TCGA-UY-A9PD	TCGA-UY-A9PD-01A-11R-A38B-07	0.887766	-1.22573	-0.0749387	-1.30349	-0.886002	0.12057	-0.229823	-1.43261	-0.546051	-0.545644	0.248907	-0.0315852	0.0205913	0.078063	0.096946	-0.180979	0.311223	0.58513	-0.735043	0.305301	0.606195	0.208938	-0.133524	0.714779	0.927447	0.261291	-0.131214	-0.235813	0.193031	0.0322699	-0.245922	0.0925652	-0.516819	-0.334304	0.284487	1.18183	0.529916	-0.465709	0.714471	0.848238	2.72109	1.87945	1.0893	-0.886002	-0.665324	0.839912	-0.359805
BLCA	TCGA-UY-A9PE	TCGA-UY-A9PE-01A-11R-A38B-07	-1.47379	-2.168	-0.536052	-1.18195	-0.689497	-0.198156	0.00240216	NA	NA	NA	0.249044	0.0422875	0.0183808	-0.218446	0.0258378	-0.199213	0.881158	0.948793	-0.476563	0.729664	0.844747	-0.252424	0.125982	0.619383	0.087291	0.260281	-0.0249883	-0.247703	-0.221092	-0.0434405	-0.230571	0.783645	0.0205728	0.184954	1.56129	2.02147	-0.136992	0.153968	0.569443	-0.199682	-0.168912	1.22877	0	-0.689497	-0.375722	1.28452	-0.431922
BLCA	TCGA-UY-A9PF	TCGA-UY-A9PF-01A-11R-A38B-07	-0.0162393	1.2242	-0.83914	-0.412766	0.196391	0.031162	0.687396	NA	NA	NA	-0.366526	0.0314377	0.539636	-0.191062	-0.205159	-0.182617	0.284866	1.58578	-0.717249	-0.309943	0.819965	-0.299021	-1.48232	0.259779	0.0321981	-0.028309	-0.0208529	0.339595	-0.212509	-0.394119	-0.189733	-0.0548595	1.63544	-0.250828	-0.431568	1.15319	-0.311362	-1.83297	0.16713	-0.277386	0.227637	-0.461701	0	0.196391	0.101008	-0.0557923	-0.190614
BLCA	TCGA-UY-A9PH	TCGA-UY-A9PH-01A-11R-A38B-07	-1.62074	-0.248444	-0.0366103	-0.379872	0.69636	0.497759	-0.0871809	NA	NA	NA	-0.396962	0.0353827	0.235551	-0.182452	0.0308343	-0.284135	-0.206845	1.61229	-0.726663	-0.282391	-0.0141249	0.126071	0.231482	1.14819	-0.443859	-0.13676	-0.0472915	0.0439383	-0.210178	-0.0368594	-0.293153	-0.581723	1.76422	-0.297043	-0.23967	0.23185	0.205002	-0.0829672	1.25401	-0.710893	0.0586597	-0.461701	0	0.69636	1.12089	1.62225	1.0384
BLCA	TCGA-XF-A8HB	TCGA-XF-A8HB-01A-11R-A36F-07	-0.0587312	0.282943	-0.150886	-0.0761083	-0.555088	-1.1751	-1.80603	-0.529188	-0.280957	-0.838902	-2.23759	-0.156853	0.404213	0.295846	0.125756	-1.07669	1.69113	1.3115	-1.47155	1.08312	0.548167	1.70617	1.2771	1.70863	0.671164	-0.969515	-0.21035	0.261571	0.425256	0.0843769	-1.26445	1.75216	1.01097	-1.01989	1.71801	1.18367	2.57963	1.34676	2.1057	0.527688	-0.168912	-0.461701	0.165124	-0.555088	-0.864182	-2.08798	-1.51918
BLCA	TCGA-XF-A8HC	TCGA-XF-A8HC-01A-11R-A36F-07	-0.0311771	-3.35042	0.304133	-0.546036	-0.185116	-1.45246	-1.17573	0.0335392	-1.06295	-0.0429326	-2.124	-0.496441	0.497302	-0.767896	0.0346007	-1.50922	0.403439	1.19054	-1.75262	0.0587048	0.705987	0.626156	1.49392	0.756578	0.573701	-0.828957	-0.644529	0.287433	-0.873243	-0.0260874	-1.88567	0.138734	0.924891	-1.44399	0.00966337	1.38985	0.953851	1.22174	0.840149	0.362158	0.0091275	-0.461701	0	-0.185116	-2.0707	-2.06602	-1.73791
BLCA	TCGA-XF-A8HD	TCGA-XF-A8HD-01A-11R-A36F-07	-0.530026	-0.12064	0.295864	0.410578	1.66256	-0.312669	0.0717437	-1.7423	-1.85615	-1.08743	-0.12173	0.20878	0.0786788	-0.484632	0.147413	-0.473465	-0.913054	1.04273	-0.641205	-0.715226	-0.536029	-0.666571	-0.0952387	-0.253917	0.392643	0.0914782	0.140357	-0.151957	-0.563939	0.0871069	-0.465152	-1.56832	0.390357	-0.178509	-0.905437	-0.733209	-0.781742	-0.337673	-0.520887	0.163972	-0.168912	-0.461701	0	1.66256	0.916747	1.32878	1.20551
BLCA	TCGA-XF-A8HE	TCGA-XF-A8HE-01A-11R-A36F-07	-0.61118	1.04679	1.26554	1.04308	1.55423	-0.0800225	0.020441	-0.818379	-2.12596	-0.181213	0.0662019	0.37472	0.216711	0.317727	0.292338	-0.207951	1.26165	0.687439	-0.414871	0.569835	-0.37418	0.444213	0.455661	0.31078	0.905323	0.178039	0.399447	-0.0291581	0.411038	0.293183	-0.143185	1.08358	-0.556946	0.186094	0.94329	-0.313395	0.810328	0.239071	0.225861	0.807389	2.2987	2.50517	0	1.55423	1.14505	0.611799	0.57587
BLCA	TCGA-XF-A8HF	TCGA-XF-A8HF-01A-11R-A36F-07	0.188326	-0.624252	-1.40297	-0.766962	-0.956814	0.380848	-0.229855	-0.124761	-0.223753	-0.0458699	-0.230239	-0.0491022	0.15098	0.0168967	-0.0515228	-0.0914282	0.166958	0.603475	-0.538163	-0.161647	0.745355	0.384411	0.22196	1.7124	-0.00563914	-0.00384166	-0.163322	-0.0826999	0.103533	-0.146136	-0.0340039	-0.0363985	-0.526699	0.0228304	-0.057665	1.35666	0.661464	-0.0888492	1.99349	-0.176821	2.07848	-0.310847	2.92957	-0.956814	0.0662335	1.60429	-0.310683
BLCA	TCGA-XF-A8HG	TCGA-XF-A8HG-01A-11R-A36F-07	-0.3098	1.09211	-1.2085	-0.408414	-0.249002	-1.70168	-1.80551	-0.10826	-0.410815	-0.814515	-2.57515	-0.564103	0.412517	-0.343599	-0.21785	-1.30459	1.17948	1.13295	-2.0025	-1.53215	-0.180461	0.227971	-0.83796	0.0975845	0.70897	-1.10954	-0.726054	0.212493	-0.439608	-0.355511	-1.91879	1.24291	0.949328	-1.7261	-1.80154	-0.0200162	0.441299	-1.29206	-0.0335539	0.519506	0.670628	-0.461701	0	-0.249002	-1.35521	-2.295	-1.56805
BLCA	TCGA-XF-A8HH	TCGA-XF-A8HH-01A-11R-A38B-07	-2.06056	-0.403122	-0.784579	-0.542272	-0.292938	0.422299	0.987575	-0.0575121	-0.38717	-0.305863	0.0108135	0.0139273	0.162472	-0.0512284	-0.00902383	0.273916	-0.657305	0.910707	-0.0416795	-0.615307	0.11159	-0.334411	-0.369024	0.00184852	-0.186847	0.114704	-0.0713173	-0.0630263	0.0102937	-0.135455	0.431077	-1.14036	-0.200068	0.504631	-0.765413	0.218974	-0.283035	-0.802225	-0.192002	-0.702588	0.526223	-0.461701	0	-0.292938	-0.174645	-0.152138	0.0569568
BLCA	TCGA-XF-A8HI	TCGA-XF-A8HI-01A-11R-A38B-07	0.572207	-0.294588	-0.857344	0.68717	-0.284629	-0.515386	-0.00450265	0.815712	-0.320164	-0.15649	-0.8386	0.124123	0.406732	-0.0799093	0.0529065	-0.272536	0.162456	1.54276	-0.78538	0.176314	-0.13345	-0.363924	0.0507597	-0.112379	0.0586806	-0.248433	0.0958617	0.167874	-0.00185409	-0.0541516	-0.194672	-0.344238	1.53314	-0.297632	0.43595	0.0421443	-0.418725	-0.0585554	-0.364172	-0.464313	-0.168912	-0.159382	0	-0.284629	-0.0508799	-0.272142	-1.04517
BLCA	TCGA-XF-A9SG	NA	NA	NA	NA	NA	NA	NA	NA	-1.86112	-1.27315	-0.77347	NA	NA	NA	NA	NA	NA	NA	NA	NA	NA	NA	NA	NA	NA	NA	NA	NA	NA	NA	NA	NA	NA	NA	NA	NA	NA	NA	NA	NA	NA	NA	NA	NA	NA	NA	NA	NA
BLCA	TCGA-XF-A9SH	TCGA-XF-A9SH-01A-11R-A39I-07	0.268419	0.919463	-2.24515	0.989445	-0.998368	-0.51288	0.00943989	0.0341263	-0.443566	-0.0279464	-0.67973	-0.206512	0.19991	-0.230117	-0.297546	-0.0945301	0.834823	1.07191	-0.734619	0.470219	0.875831	-0.332526	1.42311	0.336469	-0.51529	-0.169225	-0.323774	-0.0692781	-0.280687	-0.523681	-0.0576338	0.622401	0.538481	-0.39474	0.393367	1.46799	-0.33231	1.26588	0.257204	-1.03659	0.230573	-0.461701	0	-0.998368	-0.614432	-0.793996	-0.321257
BLCA	TCGA-XF-A9SI	TCGA-XF-A9SI-01A-11R-A39I-07	0.219355	0.0997366	-0.319942	0.00853976	1.44241	0.992364	0.845612	-0.445544	0.0696121	-0.241655	0.612224	0.0927792	0.267908	-0.204	0.230113	0.455569	-0.467368	0.089902	0.716293	0.259304	0.414773	0.636907	0.519966	0.276574	-1.00783	0.489795	-0.0101709	0.0157	-0.233271	0.171627	0.781056	-0.727575	-1.50637	1.5944	0.454984	1.03883	1.08216	0.371103	0.184077	-1.24612	-0.168912	0.672429	0	1.44241	2.19571	2.04265	1.30025
BLCA	TCGA-XF-A9SJ	TCGA-XF-A9SJ-01A-11R-A39I-07	-0.105744	0.402691	0.236347	-0.166183	1.05151	0.595529	-0.352922	-1.24682	-1.33182	-0.774342	0.678419	0.384624	0.766423	-0.0808852	-0.0370879	-0.651233	-0.038958	1.25256	-0.547432	0.59998	0.111944	0.733861	1.78285	1.18512	-0.842556	0.50015	0.36531	0.599256	-0.0699428	-0.130616	-0.936287	-0.439366	0.793446	-0.032352	0.746553	0.364019	1.31406	1.90211	1.37023	-1.15429	0.891753	-0.461701	0.232919	1.05151	1.09929	0.92871	1.26165
BLCA	TCGA-XF-A9SK	TCGA-XF-A9SK-01A-11R-A42T-07	-1.96242	-1.46457	-1.72289	-0.425391	-0.455282	0.709068	0.61163	-0.502445	-0.847772	-0.220622	0.564627	0.0285998	0.275185	-0.0234946	-0.206731	0.594734	-1.16871	0.453226	-0.243779	0.416449	-0.162271	-0.83867	0.394933	0.298122	-1.93599	0.452062	-0.0480048	0.0864027	-0.00502603	-0.41685	0.903095	-1.80971	-1.08194	0.298704	0.334784	0.0201706	-1.02059	0.0691186	0.162721	-2.54943	-0.00214163	1.68802	0.542672	-0.455282	0.56797	1.85697	0.603781
BLCA	TCGA-XF-A9SL	TCGA-XF-A9SL-01A-11R-A39I-07	-0.354532	0.220512	-1.5401	-0.480836	-0.436434	1.56903	1.75967	-0.648554	-1.36725	-0.141042	1.30677	0.282596	0.440657	-0.0251467	-0.118893	0.214167	-1.50584	0.104595	0.477431	0.426331	0.587242	0.167237	-0.164881	0.610201	-1.86331	0.898339	0.19885	0.24397	0.0118916	-0.300276	0.436084	-1.81775	-1.51937	1.17527	0.509774	1.1015	0.458561	-0.489018	0.609743	-2.16492	-0.005748	-0.461701	0	-0.436434	0.838841	1.55814	0.699009
BLCA	TCGA-XF-A9SM	TCGA-XF-A9SM-01A-11R-A42T-07	1.097	0.845634	0.45656	0.669424	1.68088	0.703291	0.200058	-0.937507	-0.57364	-1.38029	1.04307	0.263567	0.0655662	0.0945269	0.233424	-0.0855344	-0.123915	0.513103	-0.262443	-0.272651	-0.586151	-0.449445	0.295224	0.198115	0.119798	0.640513	0.206251	-0.168016	0.109272	0.191328	-0.069501	-0.690553	-1.2029	0.256396	-0.382068	-0.750633	-0.457797	-0.0208615	-0.00427781	0.0345476	0.17592	2.29955	0.222043	1.68088	1.68319	1.41905	1.50441
BLCA	TCGA-XF-A9SP	TCGA-XF-A9SP-01A-11R-A39I-07	-1.73523	0.0748493	-1.28166	-1.19465	-0.90335	1.18887	1.3416	-0.470105	-0.961621	-0.0590396	1.27272	0.0891242	0.224304	-0.0141959	-0.0422052	0.520475	-1.24625	0.455639	0.391436	0.118782	0.567405	0.209177	0.172913	0.47728	-1.08676	0.863717	-0.0212897	0.0292388	0.0270512	-0.181903	0.889702	-1.8329	-1.12527	1.03815	0.250686	1.09555	0.541943	-0.0687391	0.409698	-1.64712	2.90477	1.01055	2.43331	-0.90335	0.235448	0.221062	0.467839
BLCA	TCGA-XF-A9ST	TCGA-XF-A9ST-01A-11R-A42T-07	-0.228555	-0.754762	1.37045	-0.932964	0.972708	-0.65964	-1.81689	0.0873328	-0.615556	0.49272	-1.35013	-0.230148	-0.519423	-0.488672	0.278752	-0.646983	2.07158	-0.287303	-1.98223	-0.168287	-0.62876	0.711391	-0.876087	1.03427	2.20762	-0.650582	-0.315875	-0.859656	-0.534143	0.306328	-0.741928	2.1108	-1.61745	-1.79927	-0.214491	-1.02356	1.15498	-1.41917	1.13307	2.28136	2.14265	-0.461701	0	0.972708	-1.17636	-2.12872	-1.16362
BLCA	TCGA-XF-A9SU	TCGA-XF-A9SU-01A-31R-A39I-07	0.200152	-0.126594	-0.208269	-0.74539	-0.536159	0.616111	0.456038	NA	NA	NA	1.01984	0.219401	0.185945	-0.0312346	-0.100847	-0.022033	0.122793	0.78998	-0.592277	-0.533563	0.179537	-0.37723	-0.113074	1.26247	-0.743982	0.699387	0.146977	-0.0251284	0.0196496	-0.202619	0.0451248	-0.220207	-0.286473	-0.157608	-0.618338	0.504935	-0.268613	-0.463647	1.43574	-1.1089	-0.168912	-0.287731	0	-0.536159	0.311026	0.64441	0.0348126
BLCA	TCGA-XF-A9SV	TCGA-XF-A9SV-01A-21R-A42T-07	0.0551218	-1.10195	-0.534789	-0.435526	-1.60232	0.489224	0.334442	0.0115924	-1.25134	0.623704	0.366488	-0.00120915	0.142987	-0.00111675	-0.0577472	-0.27657	-0.171699	1.14922	-0.709436	-0.481012	-0.0692726	-0.464018	0.0685432	0.208557	0.360037	0.280092	-0.0789596	-0.123915	0.0672891	-0.179687	-0.273342	-0.782195	0.562624	-0.293804	-0.686378	0.0171431	-0.499851	-0.249585	0.0876951	0.0261345	-0.168912	-0.237523	0	-1.60232	-0.766416	-1.01799	-0.401418
BLCA	TCGA-XF-A9SW	TCGA-XF-A9SW-01A-11R-A42T-07	-0.355665	0.284924	-1.47369	-0.1068	-0.524139	1.88627	2.16606	-0.407637	-1.31428	-0.12369	1.38905	0.38324	0.333425	0.0759414	-0.0124926	0.0736043	-1.3646	-0.893355	0.768534	0.707266	0.331423	0.355241	-0.557997	0.612138	-0.708698	0.907997	0.33658	0.0688129	0.158922	-0.159844	0.237818	-1.69601	-2.63786	1.53313	0.809617	0.674463	0.625141	-0.96753	0.622984	-1.06178	-0.168912	-0.461701	0	-0.524139	-0.287725	0.401589	0.630045
BLCA	TCGA-XF-A9SX	TCGA-XF-A9SX-01A-21R-A39I-07	-0.0461954	0.579234	-0.831242	-0.836383	1.20358	1.24734	0.457632	-0.0853954	-1.0006	0.31773	1.3213	0.242011	0.240952	-0.650418	-0.0528765	-0.0704735	-0.834395	0.214611	-0.599355	-0.631475	-0.759275	-0.648968	-0.352117	0.584578	-0.98336	0.867453	0.161974	0.0316735	-0.812094	-0.186398	-0.0358694	-1.31326	-1.21729	-0.0726286	-0.926463	-1.03688	-0.664625	-0.794193	0.61179	-1.2074	-0.168912	-0.0726451	0	1.20358	1.11753	1.40062	1.38307
BLCA	TCGA-XF-A9SY	TCGA-XF-A9SY-01A-21R-A42T-07	-2.22117	1.71565	0.925165	1.16315	2.67015	1.71721	0.653635	-1.4849	-2.06075	0.325917	1.80984	0.380049	0.104409	0.1022	0.227725	-0.0280961	0.028082	-0.811165	-0.191137	-0.0138246	-1.13149	-0.119072	0.447664	-0.719082	0.84032	1.06569	0.354851	-0.15113	0.105908	0.194244	0.00648434	-0.339272	-2.49822	0.373563	0.0136404	-1.56848	-0.0643735	0.208493	-1.07643	0.845261	0.297481	0.938481	0	2.67015	1.5292	1.12883	2.24423
BLCA	TCGA-XF-A9SZ	TCGA-XF-A9SZ-01A-11R-A39I-07	-0.247628	-0.931703	-0.578996	-0.648646	-0.550446	1.12599	0.309157	0.0037009	0.289831	-0.176605	1.03367	0.218038	-0.0760205	-0.0462753	-0.071959	-0.32078	-0.86582	0.680378	-0.41309	0.040734	-0.23911	-0.252481	0.326224	0.753182	-0.442543	0.637399	0.17789	-0.333226	0.0258506	-0.191546	-0.403925	-1.51425	-0.263452	0.100631	-0.0184129	-0.330721	-0.221407	-0.040736	0.726965	-0.824098	0.618351	-0.206724	0	-0.550446	-0.00499671	0.0577272	0.327465
BLCA	TCGA-XF-A9T0	TCGA-XF-A9T0-01A-11R-A39I-07	-1.57045	0.695844	-0.01452	-0.366471	-0.402922	0.00280876	-0.310313	-1.09993	-1.75992	0.222669	0.254354	0.121274	-0.0210056	-0.325698	0.0530952	-0.104815	0.777954	0.636012	-0.915755	0.0862746	-0.0753444	-0.375506	0.243023	0.645912	0.559608	0.252326	0.0874639	-0.283803	-0.349245	-0.0175941	-0.0980059	0.654991	-0.529234	-0.532898	-0.031696	-0.146579	-0.29417	0.126417	0.604871	0.476298	2.96294	1.73775	1.19302	-0.402922	0.499867	0.0852523	0.0104695
BLCA	TCGA-XF-A9T2	TCGA-XF-A9T2-01A-11R-A42T-07	0.464241	0.067462	0.628676	-0.730034	-0.860844	1.10373	0.654928	-0.368693	-0.443144	-1.44361	0.798433	0.43598	0.381494	0.35001	0.205996	1.47598	0.75929	-0.59734	-0.240486	0.0318444	-0.371162	-0.139543	0.0355415	0.301989	0.67813	0.402223	0.420133	0.225566	0.553011	0.172469	2.26179	0.354689	-2.02095	0.480617	0.0934464	-0.697128	0.12825	-0.257279	0.190055	0.347129	2.36254	-0.461701	0	-0.860844	0.637725	0.0560527	-0.306354
BLCA	TCGA-XF-A9T3	TCGA-XF-A9T3-01A-11R-A42T-07	-0.193396	0.356976	0.493397	0.667272	1.31862	0.519773	1.16358	-1.01694	0.157783	-1.04793	1.05407	0.19822	-0.0135605	-0.032017	0.126585	-0.021729	-1.17318	0.719188	-0.359131	-0.334139	-0.227886	-0.626913	-0.604407	-0.344266	-0.429706	0.720773	0.136177	-0.270525	-0.0196806	0.053873	0.0625781	-1.69929	-0.633558	0.22545	-0.404489	-0.121791	-0.614064	-1.16662	-0.631914	-0.741999	-0.168912	-0.21898	0	1.31862	0.691681	1.06861	1.13975
BLCA	TCGA-XF-A9T4	TCGA-XF-A9T4-01A-11R-A39I-07	0.376436	0.372213	0.0252136	1.37469	2.25339	2.02794	0.0662519	0.0163531	0.810929	0.762784	1.24793	0.573909	0.711611	0.338078	0.062377	0.256832	-0.870972	1.28803	-0.652697	-0.512542	-0.655722	-0.433154	-0.122635	-0.657027	-0.49353	0.718343	0.603025	0.592334	0.408715	-0.0303881	0.564769	-1.56638	0.654138	-0.123949	-0.747112	-1.10273	-0.482248	-0.417921	-1.0444	-0.977974	-0.168912	-0.461701	0	2.25339	0.444662	-0.161674	1.90431
BLCA	TCGA-XF-A9T5	TCGA-XF-A9T5-01A-11R-A42T-07	-1.06977	0.966162	0.511604	0.66647	0.802731	0.608229	0.0789083	0.310071	0.379922	0.118826	0.623368	0.273386	-0.101944	0.154764	0.253619	-0.301645	1.62814	0.147403	-0.020242	0.88013	-0.136027	1.78357	1.38824	1.69265	-0.0111338	0.416092	0.259531	-0.402762	0.192453	0.233115	-0.359115	1.53504	-1.41666	0.576743	1.21195	-0.0753962	2.71551	1.33307	1.95047	-0.0606971	0.126099	2.61384	1.20031	0.802731	1.71316	1.39517	1.04797
BLCA	TCGA-XF-A9T6	TCGA-XF-A9T6-01A-11R-A42T-07	-0.300495	1.70048	-0.43858	-0.507484	0.830583	-0.746074	-1.82607	-0.137904	0.109495	-0.282484	-0.560294	0.0774588	0.050784	-0.368105	0.0873517	-1.2647	1.39313	1.19122	-1.55199	-0.346938	-0.602884	-0.281755	0.811347	0.837033	0.211372	-0.17011	0.0388761	-0.201036	-0.511442	0.0279542	-1.64211	1.33829	0.742255	-1.2356	-0.49049	-0.880009	-0.2237	0.582541	0.877027	0.210092	-0.168912	0.101795	0	0.830583	-0.190068	-1.13423	0.357258
BLCA	TCGA-XF-A9T8	TCGA-XF-A9T8-01A-11R-A39I-07	0.276027	1.01692	0.454137	2.58668	1.83264	0.662294	0.359783	-0.144789	-1.34397	-0.490476	0.850127	0.546446	0.437031	0.475763	0.167003	-0.434817	0.267601	0.833581	-0.282781	0.197262	-0.463476	-0.0115242	1.07027	0.699792	0.14441	0.581086	0.596925	0.28488	0.646105	0.137246	-0.531034	-0.249552	-0.319465	0.32242	0.440752	-0.529944	0.239743	1.02592	0.700968	-0.0412992	2.366	2.25611	0.671275	1.83264	1.48051	0.946055	0.884447
BLCA	TCGA-XF-AAME	TCGA-XF-AAME-01A-12R-A42T-07	-0.226567	0.904075	-0.72242	0.975087	0.48637	1.57208	1.74905	0.282533	-0.610336	0.102308	1.46977	0.453037	0.292624	0.46091	0.138968	0.97399	-1.30567	-0.637767	1.41077	0.26974	0.382545	-0.31497	-0.11301	0.03494	-0.836163	0.935341	0.423287	0.0880761	0.644702	0.0409803	1.55301	-1.70386	-2.56705	2.37893	0.344214	0.863843	-0.25888	-0.479614	-0.123422	-1.11557	-0.168912	-0.461701	0.200693	0.48637	1.23758	1.55897	0.999616
BLCA	TCGA-XF-AAMF	NA	NA	NA	NA	NA	NA	NA	NA	0.286319	-0.225636	-0.132608	NA	NA	NA	NA	NA	NA	NA	NA	NA	NA	NA	NA	NA	NA	NA	NA	NA	NA	NA	NA	NA	NA	NA	NA	NA	NA	NA	NA	NA	NA	NA	NA	NA	NA	NA	NA	NA
BLCA	TCGA-XF-AAMG	TCGA-XF-AAMG-01A-11R-A42T-07	-0.908942	0.143699	1.25007	-0.0651733	-0.25597	0.346042	0.146235	-1.01184	0.26247	-0.356071	0.185529	-0.0523141	-0.0371247	0.317998	0.386993	0.382358	0.53158	-0.418811	0.387431	-0.177246	0.368667	-0.648002	0.0994048	0.226052	0.837962	0.268605	-0.133965	-0.317147	0.472821	0.412854	0.686778	0.172878	-2.07792	1.08298	-0.337514	0.945436	-0.631728	-0.0201935	0.0998026	0.628736	2.6985	1.64774	0.222908	-0.25597	0.363353	0.584118	-0.0848398
BLCA	TCGA-XF-AAMH	TCGA-XF-AAMH-01A-11R-A42T-07	-0.366953	-0.135039	-0.31265	-2.23354	-1.41206	-0.350396	-1.17279	-1.40012	-1.32547	-0.789857	0.209725	0.243427	0.0330486	-0.0399714	-0.163887	1.63754	0.695503	0.697051	-0.865784	0.235456	-0.249554	-0.073555	-0.319962	1.80552	-0.514445	0.192067	0.185033	-0.171928	0.0048741	-0.30707	2.4556	0.393416	-0.128506	-0.174159	0.333937	-0.275094	0.263996	-0.820896	2.13325	-0.739956	-0.00790312	-0.320453	0	-1.41206	0.607255	-1.23149	-0.758221
BLCA	TCGA-XF-AAMJ	TCGA-XF-AAMJ-01A-11R-A42T-07	-0.9938	-0.180592	-1.5823	0.557837	-0.446684	1.25344	1.84441	-1.10358	-0.864501	-0.431369	1.74713	0.205647	0.119505	0.323961	-0.109185	0.641088	-1.18145	-0.229567	0.0982729	0.35377	-0.0895259	-0.784567	1.20027	-0.362228	-0.859867	1.0459	0.130177	-0.0827723	0.475084	-0.270633	0.996688	-1.64403	-2.18207	0.648985	0.247843	-0.0578047	-0.983009	0.829224	-0.668245	-1.40627	-0.168912	-0.461701	0	-0.446684	-0.0476701	-0.131848	0.560987
BLCA	TCGA-XF-AAML	TCGA-XF-AAML-01A-11R-A42T-07	1.74955	-1.50901	0.439171	-0.668745	0.469686	-1.68767	-1.53694	-0.103018	-0.449908	0.159673	-1.76513	-0.288604	0.0228141	-0.87161	0.164295	-0.73468	0.886972	1.56694	-1.43474	0.0919266	0.206072	0.00410421	1.34551	-0.0195595	0.371569	-0.733363	-0.403205	-0.203092	-1.05683	0.13406	-0.936094	0.802548	1.54865	-1.12746	0.112569	0.493722	0.185964	1.2528	-0.213589	0.317551	-0.168912	0.363508	0	0.469686	0.81246	0.21424	-0.469038
BLCA	TCGA-XF-AAMQ	TCGA-XF-AAMQ-01A-11R-A42T-07	0.212415	0.311519	0.179996	0.1326	0.437694	-0.443515	0.128101	-1.12018	-0.431868	-0.464636	-0.7716	0.105929	0.169491	-0.278136	0.126525	0.547506	0.580194	1.74462	-0.578777	-0.409497	-0.245959	-0.358116	-0.372101	-0.398907	0.0868929	-0.271854	0.0609814	-0.0723371	-0.281722	0.0655428	0.983834	0.163624	1.86683	-0.0292627	-0.42554	-0.226902	-0.306751	-0.720941	-0.719594	-0.253476	-0.168912	-0.461701	0	0.437694	1.232	0.672907	0.171813
BLCA	TCGA-XF-AAMR	TCGA-XF-AAMR-01A-31R-A42T-07	-0.639604	-0.40876	-0.568232	1.83291	-0.314466	0.574323	2.64071	NA	NA	NA	0.575022	0.273312	0.437293	0.132241	0.0694543	0.444178	-1.39992	-0.261419	1.04483	0.514521	0.738061	0.635335	0.0790537	0.142591	-0.687731	0.494477	0.202455	0.249351	0.173495	-0.06467	0.75822	-1.70813	-2.05904	1.87427	0.722993	1.43425	1.06062	-0.231919	-0.00250774	-1.14352	0.0162478	0.247172	0	-0.314466	-0.526521	0.223107	0.0844278
BLCA	TCGA-XF-AAMT	TCGA-XF-AAMT-01A-11R-A42T-07	-0.256801	0.573639	-0.594859	1.12726	0.614462	1.3552	1.07281	0.0075327	-0.522294	0.75073	1.20803	0.464788	-0.000474247	0.314235	0.134339	0.870023	-1.31977	-0.286277	0.630276	0.140146	-0.554946	-0.542899	0.552476	-0.210148	-0.137618	0.748574	0.457747	-0.20564	0.427129	0.0440691	1.36817	-1.96232	-2.16186	1.43339	0.062767	-0.773506	-0.698181	0.278732	-0.45591	-0.602067	2.09575	0.205985	1.55547	0.614462	-0.747552	0.692104	1.11343
BLCA	TCGA-XF-AAMW	TCGA-XF-AAMW-01A-11R-A42T-07	-2.44696	0.926593	0.268359	0.842528	1.42175	1.75478	0.749008	-0.973534	-0.376963	0.386228	1.59342	0.325786	0.195006	0.272965	0.0768063	-0.0183759	-0.22796	0.431789	-0.555002	-0.707449	-1.10439	-0.485131	-0.591969	-0.446414	-0.0791535	0.926953	0.319892	0.00893795	0.322157	-0.00607623	0.10984	-0.724095	-0.997342	-0.0342166	-0.967057	-1.54235	-0.462501	-1.00459	-0.757343	-0.409213	-0.168912	-0.461701	0	1.42175	-0.0221444	-0.33357	0.874719
BLCA	TCGA-XF-AAMX	TCGA-XF-AAMX-01A-11R-A42T-07	-0.0375169	-0.0333388	0.390093	-1.69616	-0.512513	-0.322247	0.0514148	0.643884	-0.937915	-0.28196	-0.53332	-0.376145	-0.444436	-0.218743	0.0707711	-0.713692	-0.130133	1.41707	-1.17787	-1.20645	0.0988165	-0.251273	-0.021642	0.0155168	0.505649	-0.207349	-0.526766	-0.845934	-0.181933	0.0129148	-0.800632	-0.544906	1.13905	-0.836628	-1.71436	0.268304	-0.175529	-0.420255	-0.260964	0.289347	1.19609	-0.461701	0	-0.512513	-0.111618	-1.0376	-0.599134
BLCA	TCGA-XF-AAMY	TCGA-XF-AAMY-01A-11R-A42T-07	0.858252	-0.999041	-0.0055427	-0.694152	-0.714098	0.367261	0.598217	-0.0763985	-0.826685	0.348781	0.28577	-0.00497724	0.136006	0.276172	0.0196155	0.339884	-0.573662	1.21606	0.0112386	-0.18607	0.148486	-0.726546	-0.243636	-0.38429	-0.207553	0.270793	-0.0923192	-0.147511	0.398545	-0.0868673	0.668166	-1.19149	0.59448	0.51808	-0.503016	0.200956	-0.881308	-0.555588	-0.725396	-0.697063	1.79355	1.09568	0	-0.714098	-0.659745	-0.675711	-0.211027
BLCA	TCGA-XF-AAMZ	TCGA-XF-AAMZ-01A-11R-A42T-07	0.58743	0.307319	0.342764	-0.529475	-0.920276	-0.343045	-0.344759	-0.802536	-0.365632	-0.525454	-0.945651	0.03219	0.259136	-0.105648	0.196906	-0.163598	1.28928	0.92563	-1.14458	-0.00272646	0.519698	0.87984	-0.0610122	0.667124	0.796092	-0.301924	-0.0454551	0.0334851	-0.0837066	0.178915	-0.0832643	1.40239	0.158886	-0.91838	0.378306	0.980434	1.48385	-0.208141	0.638922	0.935036	0.210727	1.04619	0	-0.920276	0.45945	0.197671	-0.545835
BLCA	TCGA-XF-AAN0	TCGA-XF-AAN0-01A-11R-A42T-07	-0.443294	-0.265942	0.994357	-0.631502	-0.223074	-0.000714671	0.0570925	-0.324	-0.788843	-0.232916	-0.77074	-0.098654	0.27941	-0.475471	0.157346	0.137562	0.278579	1.45535	-0.396342	-0.506636	-0.598608	-0.188085	0.217816	-0.0517793	0.100783	-0.181901	-0.189388	0.084573	-0.527711	0.100002	0.240785	-0.129653	0.974682	0.172933	-0.685378	-0.742101	-0.035366	-0.0369948	-0.235244	-0.347252	-0.168912	-0.461701	0	-0.223074	0.808363	0.44178	0.350069
BLCA	TCGA-XF-AAN1	TCGA-XF-AAN1-01A-31R-A42T-07	-0.198072	-0.0662287	-0.7797	0.400824	-0.844722	-0.59965	-0.361331	NA	NA	NA	-1.58388	-0.125402	0.251798	-0.16376	-0.0277802	-0.647356	1.08028	1.1386	-1.25951	0.380836	-0.336182	-0.154303	0.0704622	0.92619	-0.214778	-0.616249	-0.205223	0.0401343	-0.122595	-0.131946	-0.661584	1.12582	0.415697	-0.87437	0.800241	-0.25779	0.00762381	-0.0862128	1.03722	-0.60612	0.261337	1.19296	0	-0.844722	-0.593586	-1.17045	-0.901973
BLCA	TCGA-XF-AAN2	TCGA-XF-AAN2-01A-11R-A42T-07	0.508522	1.39028	0.620833	0.333651	1.63639	-0.519348	-0.87045	-0.521006	-0.571027	-0.136032	-0.867024	0.0180072	0.463563	-0.403531	0.186938	-0.895314	1.20903	1.3295	-0.967215	-0.443678	-0.576213	0.0736878	0.206259	-0.218085	1.16314	-0.318741	-0.0515495	0.228142	-0.524888	0.141183	-1.14792	1.08284	0.907237	-0.579485	-0.476126	-0.773585	0.290973	-0.0495531	-0.435027	1.13471	-0.168912	-0.461701	0	1.63639	1.10805	0.70759	1.08018
BLCA	TCGA-XF-AAN3	TCGA-XF-AAN3-01A-11R-A42T-07	-0.45042	0.483782	-0.718673	0.745825	-0.0826136	0.435389	0.780185	-1.17787	-1.55627	-0.999195	0.134685	0.555454	0.380984	-0.100835	-0.0212104	0.69341	0.293454	1.14731	1.16057	1.70091	-0.0708769	-0.46268	2.83333	0.240659	-0.159118	0.206788	0.589811	0.203721	-0.121402	-0.184645	1.09315	-0.138881	0.31956	1.9314	2.47778	0.12877	-0.534295	3.12985	0.121886	-0.698087	-0.041091	-0.461701	0	-0.0826136	-0.035751	-0.0241785	0.302744
BLCA	TCGA-XF-AAN4	TCGA-XF-AAN4-01A-11R-A42T-07	-0.617804	0.75853	-1.55345	0.731476	1.61943	1.28987	2.64996	-0.752246	-0.595646	-0.00191018	1.6013	0.335583	0.172514	0.176525	-0.0490163	0.146434	-1.51549	-1.33348	0.499575	0.0214628	0.00174958	0.195018	-0.327743	-0.20676	-0.245983	1.04307	0.267188	-0.105565	0.247833	-0.234997	0.308929	-1.66872	-2.77825	1.13454	-0.0705142	0.169229	0.381427	-0.704074	-0.461805	-0.587346	-0.168912	-0.461701	0	1.61943	0.284362	1.02238	1.67829
BLCA	TCGA-XF-AAN5	TCGA-XF-AAN5-01A-11R-A42T-07	0.312156	1.60685	0.232788	0.983782	1.54323	-0.294284	-0.0523131	-0.946178	-1.2292	-0.174863	-0.0732297	0.151913	0.783122	0.104588	0.154292	-0.693614	1.45499	0.44742	-0.411383	-0.164475	-0.587522	-0.62793	0.898799	-0.336273	1.07653	0.11218	0.0966013	0.679025	0.0677426	0.0933945	-0.918327	1.36475	-0.815676	0.0733477	-0.431791	-0.99069	-0.788249	0.647304	-0.598737	1.00525	-0.168912	-0.238143	0	1.54323	0.588537	1.06486	1.03562
BLCA	TCGA-XF-AAN7	TCGA-XF-AAN7-01A-11R-A42T-07	0.960426	0.425227	1.06457	0.136654	-0.513425	1.69709	1.98083	0.475651	1.16014	1.91468	0.77493	-0.0723894	0.0532233	0.149467	0.322016	-0.404485	-0.565128	-1.59986	-1.05492	-1.32329	-0.403522	-0.192512	-0.792353	-0.522585	0.920676	0.496382	-0.176766	-0.210368	0.360148	0.327525	-0.364853	-0.969973	-2.82831	-0.607764	-1.82005	-0.357606	0.0468374	-1.3773	-0.877719	0.622886	2.94774	-0.461701	3.06811	-0.513425	-0.665262	-0.67035	-0.0440815
BLCA	TCGA-XF-AAN8	TCGA-XF-AAN8-01A-11R-A42T-07	-0.703152	1.66034	-3.81091	1.84298	-0.142101	3.01377	1.59513	-0.942279	-0.952362	0.358298	2.7705	0.628076	-0.0464874	0.202664	-0.485414	-0.141213	-1.05245	-1.48814	-0.198711	-0.465496	0.122576	-0.987657	-0.454483	-0.177078	-1.24745	1.59313	0.613339	-0.364012	0.28324	-0.853152	-0.264755	-1.27473	-2.78858	0.270985	-0.521396	0.420558	-1.16815	-0.894518	-0.353139	-1.44965	0.238495	1.14225	0	-0.142101	0.735866	0.881762	0.734853
BLCA	TCGA-YC-A89H	TCGA-YC-A89H-01A-11R-A36F-07	0.223553	0.325796	-0.269542	-0.249293	0.071568	-0.327248	-0.653681	0.368348	-0.401259	0.557109	-0.0488853	0.303311	0.606206	0.0535667	0.0242741	-0.337736	1.1564	1.00559	-1.2365	0.40313	-0.173219	0.636545	0.761927	1.0954	0.318821	0.0685081	0.261227	0.495453	0.078631	-0.0566905	-0.399361	1.22913	0.36579	-0.823615	0.832131	0.00217477	1.07133	0.733584	1.18665	0.183129	2.81796	1.6348	0	0.071568	-0.135501	-0.337179	0.160317
BLCA	TCGA-YC-A8S6	TCGA-YC-A8S6-01A-31R-A38B-07	0.103736	0.508344	-1.17753	0.744818	0.751121	1.54563	1.64316	-0.164858	-0.224688	1.01963	1.11055	0.527495	0.558621	0.616935	-0.0552637	0.443766	-1.06209	0.55497	-0.0362247	-0.573369	-0.079968	-0.509089	-0.93202	0.228879	-1.1168	0.649789	0.525525	0.422224	0.906525	-0.202039	0.872596	-1.6594	-1.03138	0.55845	-0.71617	-0.100932	-0.510823	-1.41552	0.124695	-1.64815	-0.168912	-0.461701	0	0.751121	0.407155	0.501264	0.490597
BLCA	TCGA-YC-A9TC	TCGA-YC-A9TC-01A-22R-A39I-07	0.65081	1.1039	0.0901229	-0.110235	2.18837	-0.00209354	-0.907597	-1.25581	-1.51243	1.75797	-0.280599	0.348693	0.251915	-0.27097	0.270426	-0.751073	2.44267	-0.306697	0.269341	2.21067	0.847318	2.32329	2.86409	2.39637	0.749335	-0.0234895	0.373185	0.0195546	-0.317825	0.253381	-0.862084	2.41018	-1.70233	1.06801	3.21809	1.50789	3.59485	3.22149	2.88367	0.693762	2.41759	0.252276	0	2.18837	-0.103224	-0.674671	-0.193642
BLCA	TCGA-YF-AA3L	TCGA-YF-AA3L-01A-11R-A38B-07	-0.0366492	-0.953907	-1.45801	-1.49097	-1.18059	-0.133519	-1.09924	NA	NA	NA	-1.29168	-0.229107	0.37485	0.0471923	-0.303056	-1.06003	0.334985	1.71101	-1.93293	-0.482021	0.234862	-0.385867	-1.05133	1.27183	-1.08265	-0.466415	-0.297285	0.171704	0.0976782	-0.481726	-1.2471	-0.0153254	2.08734	-1.54678	-0.0808465	0.814695	-0.310535	-1.30473	1.49227	-1.53061	0.320641	-0.461701	0	-1.18059	-0.237425	-0.717396	-1.06262
BLCA	TCGA-YF-AA3M	TCGA-YF-AA3M-01A-11R-A42T-07	0.930281	1.57086	0.800441	1.12199	-0.143939	-1.08614	-1.63467	-0.329686	0.0217218	-0.401925	-0.773774	-0.0536484	0.216623	-0.540916	0.287313	-0.547761	1.1335	1.19712	-1.36666	-0.0735627	0.146087	0.728706	0.669806	0.454093	1.28374	-0.191709	-0.15255	0.00596228	-0.722986	0.308202	-0.722335	1.05678	0.583605	-1.05155	-0.0854759	0.43918	1.19525	0.46294	0.413616	1.37024	-0.168912	-0.161792	0	-0.143939	-1.28065	-0.949507	-0.440111
BLCA	TCGA-ZF-A9R0	TCGA-ZF-A9R0-01A-11R-A38B-07	-0.13818	0.10925	-0.677015	-0.427613	0.622535	-0.719235	0.391849	-0.786575	-0.447066	-0.230912	-0.573455	-0.071872	0.160279	-0.0890486	-0.0979025	-0.240858	-0.138758	1.11807	-0.893312	-0.24669	0.122795	-0.412877	0.248506	-0.424412	-0.719772	-0.148447	-0.183028	-0.0320817	-0.0548171	-0.244554	-0.318832	-0.349533	0.642742	-0.486188	0.0288727	0.41485	-0.429222	0.228672	-0.709542	-1.33438	-0.168912	-0.277994	0	0.622535	-0.0979806	-0.249504	-0.1947
BLCA	TCGA-ZF-A9R1	TCGA-ZF-A9R1-01A-11R-A39I-07	-0.040366	-0.263817	0.492826	-1.37717	-0.443855	-0.707834	0.0764231	-1.24603	-1.28771	-0.750848	-0.504025	0.046221	0.366155	-0.276762	0.134601	0.00504296	-0.0552883	1.20922	-0.469622	0.309705	-0.0297007	-0.00891794	1.26601	-0.29185	0.285691	-0.0401341	-0.0228609	0.139083	-0.34667	0.0789906	0.215844	-0.457879	0.833663	0.0935058	0.70717	0.162962	0.149094	1.32712	-0.5916	-0.0417219	0.937781	-0.16519	0	-0.443855	-0.636735	-0.655584	-1.45784
BLCA	TCGA-ZF-A9R2	TCGA-ZF-A9R2-01A-11R-A39I-07	0.297421	-0.0719889	-0.660218	1.60784	-0.609422	-2.18542	-2.57223	-1.89234	-1.08128	-1.22069	-1.87697	-0.128908	0.295032	-0.192903	0.0104102	-0.306172	1.26487	1.67632	-1.76822	-0.513156	-0.337062	-0.36678	-0.390945	-0.0897187	0.886306	-0.79662	-0.198671	0.108298	-0.20457	-0.0813845	-0.188032	1.23016	2.03505	-1.4523	-0.402106	-0.360617	-0.402066	-0.633884	-0.319112	0.737597	-0.168912	-0.0857223	0	-0.609422	-1.4292	-1.57766	-2.24483
BLCA	TCGA-ZF-A9R3	TCGA-ZF-A9R3-01A-11R-A38B-07	-0.606038	-1.23149	-0.63072	0.168258	-0.118624	-1.00265	-0.552022	NA	NA	NA	-1.19962	-0.0712942	0.720163	-0.237618	-0.0751877	-0.591792	0.158536	1.4956	-0.244765	0.0865897	0.429508	-0.0604778	-0.311539	0.0244155	-0.428339	-0.437638	-0.140649	0.536263	-0.264656	-0.229418	-0.691281	-0.244882	1.34356	0.325579	0.237035	0.78562	0.0700161	-0.612809	-0.14483	-0.932796	0.119653	-0.461701	0	-0.118624	-0.291905	-0.218293	-0.0917328
BLCA	TCGA-ZF-A9R4	TCGA-ZF-A9R4-01A-11R-A38B-07	0.388312	0.815952	-0.538255	-0.581117	0.211477	-1.39553	-1.48682	NA	NA	NA	-1.88651	-0.43148	-0.0367474	-0.320114	0.00762874	-0.642045	1.48597	1.37665	-1.2836	-0.0584208	0.25322	-0.102624	0.0124596	-0.0937453	0.85035	-0.77608	-0.568736	-0.312821	-0.356742	-0.0944431	-0.697632	1.5236	1.08339	-0.88623	0.0839078	0.643852	-0.0911105	0.0395049	-0.3502	0.735017	-0.168912	-0.461701	0	0.211477	0.608343	0.399151	-0.918999
BLCA	TCGA-ZF-A9R5	TCGA-ZF-A9R5-01A-12R-A42T-07	0.824075	0.296916	-2.49835	-0.653637	-0.560137	-1.28271	-0.778666	NA	NA	NA	-1.86589	-0.50068	0.302765	-0.305063	-0.190173	-0.863495	0.996485	0.985329	-1.59585	-0.462234	0.0705206	-0.276127	-0.404706	0.190105	-0.302622	-0.717582	-0.655765	0.0939054	-0.369738	-0.423206	-1.0396	0.855408	0.128662	-1.31974	-0.520617	0.225504	-0.234301	-0.82551	0.020081	-0.785954	-0.0238622	-0.461701	0	-0.560137	-0.141168	-0.2305	-1.38481
BLCA	TCGA-ZF-A9R7	TCGA-ZF-A9R7-01A-11R-A38B-07	-0.766406	-1.71461	-0.789064	-1.1718	1.06325	-0.504243	-0.183494	NA	NA	NA	-1.34989	-0.207627	0.645175	0.253399	-0.033871	-0.0744348	-0.62382	1.52144	-1.27769	-0.792557	-0.653227	-2.05005	-1.78273	-0.906994	-1.40034	-0.555201	-0.325924	0.447712	0.314188	-0.171166	0.02494	-1.12948	1.35213	-0.958068	-1.22051	-1.05201	-2.73974	-2.44188	-1.29573	-1.89044	-0.168912	0.320276	0.301039	1.06325	1.87531	1.71797	0.505964
BLCA	TCGA-ZF-A9R9	TCGA-ZF-A9R9-01A-11R-A38B-07	-0.501319	-0.686225	-1.98461	-1.22496	-0.193912	0.751041	1.45482	-0.799964	-1.12839	-0.944855	0.576069	0.00356364	0.34015	-0.0854431	-0.22004	0.318002	-1.5012	0.255441	-0.265329	-0.202182	0.444217	-1.39397	-0.623052	-0.151484	-1.15886	0.44176	-0.0914315	0.0919887	-0.0892254	-0.44659	0.418727	-1.97466	-1.08592	0.201496	-0.135657	0.814552	-1.75523	-0.939043	-0.34971	-1.74893	-0.168912	-0.461701	0.566415	-0.193912	-0.101835	0.507563	0.305219
BLCA	TCGA-ZF-A9RC	TCGA-ZF-A9RC-01A-11R-A38B-07	0.0820713	-1.91868	-0.910781	-0.998027	-1.34954	0.404353	1.04472	NA	NA	NA	0.574166	0.0526602	0.086906	0.0658254	0.00148498	0.624366	-0.441403	0.339566	-0.315678	-0.329447	-0.321658	-0.945113	-0.175659	0.0524656	-0.621562	0.473664	-0.0274214	-0.171548	0.121712	-0.0869464	1.03381	-0.847986	-1.13574	0.171711	-0.159829	-0.341095	-1.1403	-0.230813	-0.17008	-1.20122	2.66642	1.66	2.61557	-1.34954	-0.936136	-0.880528	-0.519411
BLCA	TCGA-ZF-A9RD	TCGA-ZF-A9RD-01A-11R-A42T-07	-0.677091	0.862685	0.27288	0.539145	1.15089	1.06291	-0.516316	-1.5762	-0.155696	-0.887425	0.57357	0.40749	0.198681	0.114968	0.0511727	-0.324134	0.753753	0.681587	-0.306235	0.50969	-0.396791	0.580004	1.20052	1.09504	0.298803	0.436662	0.415918	-0.00471438	0.0883032	-0.0160165	-0.379903	0.42092	-0.381442	0.233502	0.583729	-0.611379	0.998662	0.971552	1.23032	0.21753	0.0754754	1.54433	0	1.15089	0.923723	1.16984	1.2187
BLCA	TCGA-ZF-A9RE	TCGA-ZF-A9RE-01A-11R-A38B-07	-0.314445	0.888948	0.23752	2.3521	-0.470711	-1.74971	-1.29073	NA	NA	NA	-2.14476	0.260477	-0.0232071	0.278428	0.238179	-0.429315	1.83718	1.4092	0.0608494	1.37349	0.0837849	0.868272	1.04922	0.266711	1.47255	-0.937098	0.31575	-0.257279	0.402407	0.21138	-0.404164	1.74893	0.955527	0.770839	2.07629	0.311073	1.49934	1.06248	0.16137	1.24244	0.466627	1.71295	1.44553	-0.470711	-0.931888	-0.814748	-1.16763
BLCA	TCGA-ZF-A9RF	TCGA-ZF-A9RF-01A-11R-A38B-07	0.222531	0.219767	0.654429	0.865019	1.95056	-0.728261	0.549593	NA	NA	NA	-1.75801	-0.0643211	0.150537	-1.13995	0.301568	-1.10321	0.826985	-1.04904	-0.843826	0.296702	-0.160118	-0.0505536	1.07433	0.0727067	0.943674	-0.736058	-0.122581	-0.0671988	-1.48279	0.287107	-1.53577	0.703792	-2.61273	-0.436968	0.449323	-0.0728778	0.0928954	0.945748	-0.118767	0.814575	-0.0310826	-0.461701	0	1.95056	1.85786	1.29754	1.95975
BLCA	TCGA-ZF-A9RG	NA	NA	NA	NA	NA	NA	NA	NA	-0.878284	-0.777841	-0.636949	NA	NA	NA	NA	NA	NA	NA	NA	NA	NA	NA	NA	NA	NA	NA	NA	NA	NA	NA	NA	NA	NA	NA	NA	NA	NA	NA	NA	NA	NA	NA	NA	NA	NA	NA	NA	NA
BLCA	TCGA-ZF-A9RL	TCGA-ZF-A9RL-01A-11R-A38B-07	-3.39764	-0.0726541	-0.220532	0.462119	-1.01912	-2.2734	-1.72128	NA	NA	NA	-2.40405	-0.381462	0.215556	-0.439032	0.0293481	-0.746587	0.860258	1.59179	-1.11344	0.601584	0.828205	-0.395904	0.64673	-0.295418	1.03807	-1.01008	-0.491078	-0.0249793	-0.501181	-0.0537757	-0.822389	0.715082	1.72662	-0.684524	0.601944	1.43102	-0.470623	0.346194	-0.547665	0.937293	-0.168912	1.77424	0	-1.01912	-1.59129	-1.6455	-2.24483
BLCA	TCGA-ZF-A9RM	TCGA-ZF-A9RM-01A-11R-A38B-07	0.362965	-0.0526886	0.758252	-0.250773	-0.00979257	-2.20249	-1.79175	-0.321995	0.214788	-0.260851	-2.3316	-0.40088	-0.0882948	-0.471981	0.204226	-0.810321	1.08543	1.48298	-0.984669	0.890778	0.609665	0.131008	0.531609	-1.03771	1.05822	-0.99859	-0.499587	-0.323267	-0.498186	0.193483	-0.9386	0.998607	1.64867	-0.493744	1.54971	1.46557	0.326078	0.599295	-1.51169	0.863588	-0.168912	-0.461701	0	-0.00979257	-2.0707	-0.927598	-1.27041
BLCA	TCGA-ZF-A9RN	TCGA-ZF-A9RN-01A-11R-A42T-07	-0.726766	0.199932	0.716519	-0.671868	1.68808	0.844357	-1.40842	-2.09937	-0.935826	-1.9279	-2.19013	-0.386964	0.201288	-0.680434	0.258927	-1.06469	1.35923	0.414856	-1.50627	-0.693194	-0.112513	-0.0096992	0.24016	0.281652	1.23806	-1.02715	-0.534863	-0.0752514	-0.753705	0.27278	-1.26698	1.19314	-0.645876	-1.1556	-1.2175	-0.107795	0.171495	-0.175398	0.184165	1.17331	-0.0188387	2.38765	0	1.68808	0.952587	0.801063	0.253997
BLCA	TCGA-ZF-AA4N	TCGA-ZF-AA4N-01A-11R-A38B-07	-1.15153	2.0923	0.274842	1.44787	0.744317	1.66598	1.91685	-0.525667	0.64632	2.38857	1.90129	0.537453	0.246309	0.40907	0.192858	0.121453	1.24535	-1.48237	0.730133	0.725642	-0.463724	0.369117	2.01348	-0.121316	0.808077	1.12286	0.559285	0.0278671	0.595508	0.147362	0.264034	0.912524	-2.90406	1.43123	1.2727	-0.393382	0.703366	2.04046	-0.33526	0.466387	1.97784	0.122535	0	0.744317	0.503827	0.122547	0.469009
BLCA	TCGA-ZF-AA4R	TCGA-ZF-AA4R-01A-11R-A38B-07	-2.1599	-0.596982	-0.358049	0.395615	-0.0741905	1.07816	0.728225	NA	NA	NA	0.847996	0.104395	0.215587	0.222638	0.297358	0.679438	-0.856588	0.149614	0.363015	0.00499317	0.32296	-0.0106732	-0.000149777	-0.308511	0.794434	0.510307	0.0230336	0.0156881	0.318784	0.279914	1.03027	-1.49014	-1.75509	1.03099	-0.0258011	0.546085	0.159405	-0.217333	-0.591858	0.327524	-0.168912	-0.461701	0	-0.0741905	-0.00946427	-0.538913	0.433332
BLCA	TCGA-ZF-AA4T	TCGA-ZF-AA4T-01A-11R-A38B-07	-0.254546	-1.94194	-0.444073	-0.68827	0.152109	-1.44092	-1.31598	-0.989338	-0.470376	-0.264991	-1.68644	-0.413759	0.28892	-0.785653	0.0893082	-0.883499	0.991782	1.31659	-1.61356	-0.189954	-0.158629	0.0928121	0.815313	-0.113169	1.03194	-0.684159	-0.551359	0.073378	-0.929166	0.0425069	-1.15714	0.853717	1.03353	-1.25233	-0.145998	-0.0628279	0.388985	0.718195	-0.362621	1.07517	2.36171	-0.461701	3.15651	0.152109	-1.33027	-0.806414	-1.09792
BLCA	TCGA-ZF-AA4U	TCGA-ZF-AA4U-01A-11R-A38B-07	0.665514	-0.228811	-1.73531	0.0392498	-1.27957	-1.53284	-1.4111	NA	NA	NA	-1.88698	-0.083366	0.235385	-0.187332	-0.129522	-0.969228	1.17745	1.60495	-1.81509	-0.0640557	-0.462901	0.428649	1.09609	0.502262	0.638671	-0.744549	-0.121902	-0.027119	-0.100197	-0.270417	-1.16326	1.19077	1.81129	-1.5351	0.286516	-0.457292	0.740121	1.13182	0.44205	0.47054	0.593957	1.02784	1.63003	-1.27957	-0.0339364	-1.80019	-1.50816
BLCA	TCGA-ZF-AA4V	TCGA-ZF-AA4V-01A-11R-A38B-07	0.530599	1.0544	0.287455	-0.335156	1.50473	0.394895	-0.331497	-1.4691	-0.0867253	0.0873527	0.136237	0.286442	0.817987	-0.0849276	0.235107	-0.215913	0.869785	0.787721	-0.432625	-0.107914	-0.787401	0.559223	0.800609	0.869149	0.926237	0.144582	0.256873	0.62137	-0.0933528	0.21662	-0.320088	0.707041	-0.196329	0.131955	-0.063594	-1.18764	0.873616	0.767044	0.896915	0.931159	-0.168912	2.47498	0.195117	1.50473	0.615683	0.895521	1.13899
BLCA	TCGA-ZF-AA4W	TCGA-ZF-AA4W-01A-12R-A38B-07	-3.81455	1.89542	0.273725	1.22575	-0.0344807	-0.895814	-1.46326	-1.97886	-2.50851	-0.371315	-0.3633	0.140655	0.0221805	0.534659	0.115535	-0.464769	1.3913	0.675493	-1.20605	-0.381528	-1.16202	0.523895	-0.058678	1.19046	0.832052	-0.0662753	0.104347	-0.196449	0.67128	0.0699565	-0.483554	1.25413	-0.121062	-0.770708	-0.688934	-1.66391	0.638164	-0.271462	1.37807	0.847325	0.0153265	2.0326	3.19318	-0.0344807	-0.124651	0.30291	-0.296118
BLCA	TCGA-ZF-AA4X	TCGA-ZF-AA4X-01A-11R-A38B-07	0.0303548	-2.79235	0.145515	-0.945414	0.51227	-1.97855	-1.19303	NA	NA	NA	-2.63926	-0.338624	0.31353	-0.830535	0.248047	-0.612401	0.899057	1.64654	-0.697913	0.760511	0.435792	0.0172158	0.27775	-0.438668	0.57575	-1.16494	-0.43433	0.122808	-0.993854	0.222059	-0.604892	0.659014	1.85887	-0.135615	1.35837	1.04498	0.264858	0.091539	-0.727529	0.290455	-0.168912	-0.461701	0	0.51227	-1.23118	-1.17409	-1.0204
BLCA	TCGA-ZF-AA51	TCGA-ZF-AA51-01A-21R-A39I-07	-1.96518	-0.493508	-1.05555	-0.0323003	0.292042	0.210346	0.813232	-0.824184	0.0475601	0.15985	0.497629	0.146418	0.391912	-0.0429684	0.0153958	0.770335	0.650334	1.07966	-0.316718	-0.185921	0.0226802	-0.220061	0.302895	0.148062	-0.305353	0.368959	0.0867983	0.218257	0.0373965	-0.0734759	1.2191	0.511123	0.198422	0.203054	-0.225284	0.129413	-0.0986094	0.199748	0.017241	-0.647316	-0.168912	1.7694	0.777429	0.292042	0.81614	1.10656	0.0312742
BLCA	TCGA-ZF-AA52	TCGA-ZF-AA52-01A-12R-A39I-07	-0.246044	-0.584364	-1.29303	-0.930117	-0.305512	1.03856	0.71868	-1.71378	-1.50897	-0.92626	0.628566	0.134682	0.124031	-0.571085	-0.0763258	-0.111413	-1.0994	0.909484	-0.420909	-0.062698	-0.343481	-0.738744	-0.175323	0.396438	-0.839892	0.408298	0.0478157	-0.102018	-0.688661	-0.219697	-0.0191054	-1.82625	-0.0663651	0.0866499	-0.357986	-0.327876	-0.859899	-0.526983	0.387691	-1.3184	0.00830939	-0.461701	0	-0.305512	0.0180378	0.176036	0.43507
BLCA	TCGA-ZF-AA53	TCGA-ZF-AA53-01A-11R-A39I-07	-0.527225	0.594531	0.446316	1.47256	1.12887	1.2354	-0.367269	-1.44158	1.21762	-0.567884	1.05362	0.489455	-0.0139894	-0.0837643	-0.0570891	-0.519125	-0.19958	0.0785618	-0.470775	0.411615	-0.167476	0.0072431	0.163866	0.811318	-0.112513	0.623996	0.504518	-0.210493	-0.115945	-0.154016	-0.721553	-0.534885	-1.41098	0.0862133	0.603504	-0.254948	0.284531	-0.120424	0.870699	-0.247065	-0.168912	1.2454	0	1.12887	0.906166	0.669946	1.98813
BLCA	TCGA-ZF-AA54	TCGA-ZF-AA54-01A-11R-A39I-07	-2.06655	0.41412	0.696207	0.785929	1.66572	2.74162	1.85706	-1.9263	1.15533	-1.24947	2.14252	0.181408	-0.0646291	0.312997	0.177917	-0.798823	0.584881	-1.91734	-0.719926	-0.231352	-0.897708	-0.0142259	-0.295182	0.323769	0.94669	1.25666	0.0975635	-0.339841	0.478995	0.120811	-0.938075	0.321513	-3.16413	-0.331587	-0.30431	-1.36149	0.123062	-0.521142	0.234605	0.78331	0.73522	1.65136	0.22907	1.66572	0.413763	0.635941	1.2192
BLCA	TCGA-ZF-AA56	TCGA-ZF-AA56-01A-31R-A39I-07	-0.0857109	0.370248	0.590573	0.747674	0.275566	0.333708	0.343299	-0.888884	-0.710346	-1.01222	0.497574	0.535904	0.209367	0.332738	0.146358	0.241833	0.451151	1.41075	0.808104	1.1005	0.198888	-0.141516	2.26184	-0.0959172	0.0739485	0.382769	0.57881	0.00930414	0.447977	0.087667	0.475978	-0.133104	0.783962	1.58444	1.66213	0.411986	-0.111268	2.49393	-0.335396	-0.308953	0.0731441	0.199975	0.204393	0.275566	0.416963	0.354033	0.378171
BLCA	TCGA-ZF-AA58	TCGA-ZF-AA58-01A-12R-A42T-07	0.980899	0.816196	0.0347009	0.5958	2.04203	2.269	0.915219	-1.58169	-0.79037	0.250954	1.64085	0.295397	0.174847	-0.0294438	0.203868	-0.774521	-0.301693	-0.878398	-0.730363	-0.208978	-0.892956	-0.388135	0.0978781	0.108069	0.183877	0.978065	0.236913	-0.0390422	-0.0383285	0.163699	-1.07836	-0.674602	-2.58729	-0.288601	-0.516859	-1.38734	-0.302618	-0.252301	-0.021304	0.0240905	-0.0342731	-0.461701	0	2.04203	1.30644	1.43276	2.10062
BLCA	TCGA-ZF-AA5H	TCGA-ZF-AA5H-01A-11R-A39I-07	-1.45682	0.0781149	0.963188	1.09966	2.05891	0.996103	0.41951	NA	NA	NA	0.415022	0.403126	-0.124869	-0.374809	0.249764	0.0799822	-0.590433	0.700725	-0.617247	-0.435456	-1.12796	-0.980184	-0.215128	-0.659694	0.413553	0.303324	0.382571	-0.378662	-0.504174	0.219594	0.171661	-1.14724	-0.291965	-0.0336906	-0.516784	-1.6373	-1.25019	-0.654714	-1.01938	0.205338	1.8015	-0.461701	0.156776	2.05891	0.919969	0.881586	2.21646
BLCA	TCGA-ZF-AA5N	TCGA-ZF-AA5N-01A-11R-A42T-07	0.468206	1.25085	-0.393313	0.664604	-0.218491	-1.66434	-1.80633	NA	NA	NA	-0.53567	0.106803	0.497506	-0.328928	-0.224742	-1.44798	1.63021	1.04996	-2.50885	-1.16061	-0.714268	0.128771	-0.125371	0.464031	0.521515	-0.119239	0.0332287	0.342272	-0.435259	-0.381029	-1.91779	1.77627	0.574498	-2.37118	-1.33531	-1.04896	0.381934	-0.34868	0.356614	0.410499	0.305498	-0.461701	0	-0.218491	-1.01214	-1.56401	-0.630536
BLCA	TCGA-ZF-AA5P	TCGA-ZF-AA5P-01A-11R-A39I-07	0.0944993	0.501727	-1.50096	0.478544	0.0189967	0.926323	2.09412	-0.706961	0.0583128	0.378829	1.01302	0.337377	0.197165	-0.157172	-0.00444152	0.253761	-1.24472	-0.320999	0.721053	0.755073	0.351821	0.0923135	0.127935	0.100295	-0.443082	0.714537	0.290009	-0.0458296	-0.124824	-0.154344	0.501127	-1.58506	-2.17341	1.44682	0.861386	0.681388	0.299787	-0.128587	-0.0426775	-0.881206	0.996529	0.326182	1.67286	0.0189967	0.178606	0.534423	0.269799
BRCA	TCGA-3C-AAAU	TCGA-3C-AAAU-01A-11R-A41B-07	-0.23042	0.321704	0.467773	-1.9763	-0.430815	-1.42851	-0.69414	NA	NA	NA	-0.242249	-0.322222	-0.275569	-0.219119	0.247193	-0.525341	-0.160564	0.062428	-0.413044	-0.866457	-0.621108	-0.651379	-0.833193	-0.475149	-0.125111	-0.504468	-0.419123	-0.220557	-0.274169	0.166345	-1.00766	0.426419	0.154217	-0.981265	-0.206286	-1.33738	-0.539037	0.073547	-0.235776	-0.788596	0	0	0	-0.430815	-0.903111	-1.03442	-1.85879
BRCA	TCGA-3C-AALI	TCGA-3C-AALI-01A-11R-A41B-07	-2.24847	-2.60363	0.332082	0.0435798	0.567512	-0.269292	-0.718217	-0.303267	-1.10103	-0.206942	0.892691	0.0925412	-0.179771	0.113042	0.234823	-0.190126	-0.954399	0.25962	-0.083983	0.283962	-0.261449	-0.1378	-0.207218	0.0851497	-0.6855	0.215557	0.161986	-0.101834	0.303234	0.160371	-0.368838	-0.480806	0.419806	-0.284721	1.26108	-0.559347	0.181425	0.863733	0.473837	-1.38625	0.711465	0	0	0.567512	1.21388	0.979157	0.429615
BRCA	TCGA-3C-AALJ	TCGA-3C-AALJ-01A-31R-A41B-07	-0.350953	-0.377673	-0.642318	-0.826495	-0.761689	0.420626	-0.163467	NA	NA	NA	1.14619	-0.108502	0.165431	0.217403	0.094624	-0.50938	-0.843192	0.0579406	-0.229078	-0.854794	-0.213084	-0.882037	-0.82817	0.185394	-0.48728	0.442925	-0.0282236	0.409129	0.376301	-0.00977616	-0.752247	-0.415323	-0.107628	-0.583401	-0.376706	-0.335478	-0.875738	-0.0226557	0.562515	-1.09658	0	0.385876	0	-0.761689	0.912801	0.861654	-0.0587063
BRCA	TCGA-3C-AALK	TCGA-3C-AALK-01A-11R-A41B-07	-0.191326	-0.20877	-0.439844	-0.679847	-0.42517	0.385184	0.705554	-0.789507	-2.08677	-0.525769	1.46094	0.133629	0.17922	0.25351	0.0906598	0.566846	-1.60074	0.295092	0.595957	-1.20582	0.0388948	-0.763301	-1.02193	-0.182882	-0.787829	0.60138	0.234428	0.38875	0.447727	-0.0180414	0.918252	-1.49915	0.363188	0.48228	-0.650116	0.0563781	-0.695548	-0.329994	0.125816	-1.8809	0	0.20702	0	-0.42517	0.180951	0.503777	-0.438321
BRCA	TCGA-4H-AAAK	TCGA-4H-AAAK-01A-12R-A41B-07	-0.115266	1.04018	-0.376534	-0.551234	-0.119402	0.441427	0.982502	-0.646386	-1.62088	-0.808518	1.45571	-0.0133211	-0.110016	0.0288405	0.0128303	0.854789	-1.7443	-0.382265	0.214724	-0.898742	0.0398255	-0.978592	-1.03735	-0.654376	-0.163316	0.592624	0.0546836	0.00442408	0.122506	-0.120848	1.41935	-1.55932	-1.00569	-0.0353525	-0.320808	-0.0552599	-0.958016	-0.353881	-0.375746	-1.13423	0.260709	0	0.560715	-0.119402	-0.100277	-0.0817293	-0.144367
BRCA	TCGA-5L-AAT0	TCGA-5L-AAT0-01A-12R-A41B-07	-0.128066	-0.0691995	-1.34407	-1.19311	-0.855686	0.526774	0.771543	NA	NA	NA	1.31245	-0.05955	-0.141923	0.188851	-0.0625671	0.497033	-1.73556	-0.0283452	0.247712	-1.02003	-0.0310486	-0.96327	-1.36566	-0.269657	-1.34669	0.460548	-0.00289618	-0.0621735	0.373182	-0.231467	0.787409	-1.39339	-0.337728	0.00860498	-0.443612	-0.197977	-0.933184	-0.79554	0.0829803	-2.55042	1.27898	0	0.730059	-0.855686	0.929287	1.01473	0.513596
BRCA	TCGA-5L-AAT1	TCGA-5L-AAT1-01A-12R-A41B-07	0.322623	-0.449406	-2.39532	-0.318918	0.590924	0.634776	-0.376876	0.294036	-0.919432	-0.423743	1.41375	0.0897491	-0.0443758	-0.0253409	-0.168531	0.131154	-1.16839	0.329803	0.0935378	-0.139946	0.344759	0.085418	-0.469626	0.304353	-1.83942	0.572684	0.16081	0.0560901	0.0218673	-0.376501	0.296441	-0.606245	0.330364	-0.0816389	1.03726	0.711094	0.575961	0.45697	0.817816	-2.63783	0	1.06034	0	0.590924	1.63695	1.45407	0.767712
BRCA	TCGA-5T-A9QA	TCGA-5T-A9QA-01A-11R-A41B-07	0.693265	-0.0498063	-0.63679	-3.5984	-1.10586	-2.21651	-3.3751	-1.50953	0.980583	-0.860116	-0.808851	-0.493429	-0.390305	-0.898551	-0.0389345	-1.567	0.587567	0.593843	-1.8545	-0.864312	0.0767845	0.0803749	-1.08503	0.21421	0.614777	-0.981798	-0.645478	-0.381464	-1.33055	-0.207737	-2.51904	1.26057	0.94692	-2.8686	0.219977	0.232296	0.557901	-0.138032	0.596274	0.244367	0	0	0	-1.10586	-1.22431	-1.37205	-2.14007
BRCA	TCGA-A1-A0SD	TCGA-A1-A0SD-01A-11R-A115-07	-0.358682	0.315005	-0.150772	-0.312983	0.31539	0.144662	0.824164	NA	NA	NA	1.25802	0.0622122	0.0845525	0.348766	0.0629008	0.572396	-1.8943	-0.0905993	1.04364	-0.84315	0.268247	-0.568247	-1.11006	-0.709929	0.604057	0.378649	0.154707	0.276028	0.653852	-0.0724671	0.942951	-1.95983	-0.364123	1.15671	-0.055192	0.411624	-0.395079	-0.143829	-0.479645	-0.567121	3.40041	0	0	0.31539	-0.176757	-0.179116	0.46947
BRCA	TCGA-A1-A0SE	TCGA-A1-A0SE-01A-11R-A084-07	-0.180423	0.282454	0.161498	-0.968618	-0.351428	-0.155416	0.796789	NA	NA	NA	0.633373	-0.0427775	-0.106458	0.116781	0.138019	0.482062	-1.2555	0.066289	0.52125	-1.15339	0.120671	-0.465024	-0.818955	-0.601595	0.76139	-0.0115316	-0.0106862	0.0371296	0.256355	0.0380376	0.661912	-1.10845	0.0140072	0.321772	-0.560458	0.179766	-0.192374	0.101254	-0.367624	-0.0950973	0	0	0	-0.351428	-0.497748	-0.140057	-0.194633
BRCA	TCGA-A1-A0SF	TCGA-A1-A0SF-01A-11R-A144-07	0.145515	0.0625267	-0.269991	-0.457555	-0.299479	-0.0912003	0.351198	0.298637	-0.63436	0.104633	0.570505	-0.131196	-0.0501495	0.0447439	0.00695964	0.384877	-0.531638	0.274577	0.169182	-0.764386	0.174576	0.166508	-0.545759	-0.16503	0.0545005	-0.0416022	-0.13741	0.0528333	0.0923227	-0.137228	0.572475	0.0706712	0.577007	-0.17021	0.0324922	0.289103	0.683411	0.396285	0.181088	-0.702792	0.734114	0	0.563929	-0.299479	1.22182	0.915641	0.57903
BRCA	TCGA-A1-A0SG	TCGA-A1-A0SG-01A-11R-A144-07	0.0304215	-1.56419	-0.782258	-0.0202523	-0.193597	-0.0387547	0.249928	NA	NA	NA	0.333667	-0.118823	-0.0118183	-0.0569212	-0.0806162	0.0836503	-1.13922	0.306253	-0.0732195	-0.580306	0.154004	-0.213816	-1.16452	-0.0603016	-0.207237	-0.156111	-0.117393	0.128106	-0.0478951	-0.252023	0.0454356	-0.860523	0.601167	-0.436721	0.221723	0.197083	0.120906	-0.540717	0.306792	-1.13722	0.398815	0.183863	0	-0.193597	-0.186609	-0.287963	-0.411684
BRCA	TCGA-A1-A0SH	TCGA-A1-A0SH-01A-11R-A084-07	-0.431944	-1.07276	-0.627792	0.00334402	-0.497187	1.09277	1.82227	0.654465	-0.216265	1.36811	1.53905	1.4628e-05	-0.278201	0.0523997	-0.139449	0.517762	-2.3698	-0.518621	0.564322	-1.44656	-0.294004	-1.07452	-1.34575	-1.18415	0.406959	0.637754	0.0879703	-0.217939	0.142408	-0.316912	0.842326	-2.50694	-1.22071	0.516591	-0.987173	-0.579786	-1.14416	-0.731015	-1.04444	-0.504553	0.399798	0	0.487715	-0.497187	-0.604415	-0.935415	-0.00419722
BRCA	TCGA-A1-A0SI	TCGA-A1-A0SI-01A-11R-A144-07	0.124033	-1.60873	0.788697	0.169881	0.934811	0.415195	1.2397	NA	NA	NA	1.24929	0.0924804	-0.018988	0.00992189	0.246158	0.384153	-2.19701	0.113747	0.720111	-0.477494	0.0944248	-0.147623	-0.097385	-0.60629	0.47935	0.455062	0.170991	0.126713	0.0760652	0.200241	0.573115	-2.28885	-0.00800178	0.759265	0.20586	0.164292	0.219295	0.789492	-0.265375	-0.490885	0	0	0	0.934811	0.935864	0.783215	0.96748
BRCA	TCGA-A1-A0SJ	TCGA-A1-A0SJ-01A-11R-A084-07	-0.634415	-0.0834681	0.494941	0.255055	-0.644515	0.129247	0.519514	0.0488525	-1.4296	-1.00435	0.404772	0.167576	0.119782	0.177977	0.125592	0.110089	-1.20653	0.0443709	1.00471	-0.542038	0.295983	0.119254	-0.251903	-0.150011	1.16275	-0.183057	0.273307	0.286273	0.369131	0.0112358	0.065626	-0.857253	-0.0650831	1.00863	0.21969	0.633598	0.636222	0.910054	0.172398	0.450163	0	0.186408	1.17149	-0.644515	0.0863493	-0.146807	-0.552661
BRCA	TCGA-A1-A0SK	TCGA-A1-A0SK-01A-12R-A084-07	2.2717	1.28358	1.84491	0.605423	-1.62327	-2.18459	-1.88228	-0.654116	0.380235	-0.957491	0.281344	0.0188852	-0.309343	0.424081	0.545167	0.2022	1.61354	-0.834601	-0.213734	0.189535	-0.418414	-0.0165517	0.418903	-0.580109	1.72717	-0.229739	0.00861625	-0.32951	0.719428	0.555377	0.193646	1.95306	-1.34081	-0.554659	1.14261	-0.661741	0.363458	1.98344	-0.192851	1.11985	1.91974	0	0	-1.62327	-0.286012	-1.15508	-1.52934
BRCA	TCGA-A1-A0SM	TCGA-A1-A0SM-01A-11R-A084-07	-0.636635	-1.52698	-0.235292	0.628418	-0.219647	0.470439	0.56617	NA	NA	NA	1.0963	0.0952269	0.0762783	0.0959654	0.0769117	0.188512	-1.64913	0.052749	0.586461	-0.971615	0.0890702	-0.654751	-1.19992	-0.733948	0.437381	0.37402	0.19593	0.265694	0.249081	-0.0314927	0.305589	-1.59268	-0.0935793	0.557125	-0.363195	0.176128	-0.553894	-0.4945	-0.489471	-0.489962	0	0.753409	0.774002	-0.219647	-0.527899	-1.49836	0.0713534
BRCA	TCGA-A1-A0SN	TCGA-A1-A0SN-01A-11R-A144-07	0.362939	-0.432367	0.717432	1.44536	0.588377	-0.0397143	0.404956	NA	NA	NA	0.947094	0.0111177	-0.0110405	0.166151	0.191326	0.230344	-0.618612	0.255474	0.468191	-0.967261	-0.409853	0.546067	0.131539	-0.586034	0.797231	0.230058	0.0363169	0.126958	0.3466	0.0978062	0.337967	0.0148307	0.324946	0.25834	-0.619452	-0.861294	1.31176	1.40006	-0.339319	0.159156	0.364418	0.403065	0	0.588377	0.311424	0.625085	0.502054
BRCA	TCGA-A1-A0SO	TCGA-A1-A0SO-01A-22R-A084-07	1.58072	0.81777	2.15553	0.922764	-1.11437	0.668576	-1.72921	0.320701	0.287542	-0.732399	-0.120396	-0.562226	-0.673258	-0.699719	0.438679	-0.390015	0.903901	-0.323714	-0.775259	-1.03422	-0.154373	-0.204597	-0.395892	-0.879467	2.28773	-0.458377	-0.78168	-0.746765	-1.02944	0.427579	-1.3055	1.36035	-0.594645	-1.57721	-0.722955	-0.120366	0.0927126	0.718505	-0.624916	1.85198	0	4.31279	0	-1.11437	-0.943672	-0.181631	-0.921755
BRCA	TCGA-A1-A0SP	TCGA-A1-A0SP-01A-11R-A084-07	-2.45104	1.23776	0.681899	0.18925	-0.0352064	0.228902	-1.42109	NA	NA	NA	0.817317	0.165038	-0.199968	0.480333	0.385334	0.991229	1.68056	-0.160105	0.833728	0.495462	0.0419601	0.366009	0.870171	0.123031	1.61363	0.12154	0.216631	-0.0868514	0.802718	0.37482	1.52153	2.15833	-0.326284	0.929206	1.69177	0.279494	0.991008	2.33707	0.591911	0.914853	0.402951	0	0	-0.0352064	0.200797	0.43719	0.777207
BRCA	TCGA-A1-A0SQ	TCGA-A1-A0SQ-01A-21R-A144-07	-1.77697	-0.603121	-0.232535	-0.887324	-0.698696	-1.30154	-0.24392	-0.155682	-0.627238	-0.176262	-0.133036	-0.0838432	-0.0503225	0.116052	-0.0264632	-0.715614	-0.574257	0.830228	-0.319037	-0.197882	0.331141	-0.277657	-0.780041	0.0051716	0.480699	-0.437715	-0.0495185	0.117556	0.242895	-0.19605	-1.34514	-0.100541	1.40254	-0.841679	0.783573	0.420285	0.036321	0.220767	0.358796	-0.023109	0	0	0	-0.698696	-0.375419	-0.647424	-1.02405
BRCA	TCGA-A2-A04N	TCGA-A2-A04N-01A-11R-A115-07	0.779528	-0.158823	-0.928895	-0.295012	-0.602445	0.282694	0.599088	0.113024	0.370788	1.64285	0.745009	0.0451589	0.0902569	-0.146499	0.0350458	0.635292	-1.31019	0.0517656	0.65906	-0.888384	0.260177	-0.496833	-1.06767	-0.343353	0.53109	0.125237	0.102159	0.251677	-0.157607	-0.102711	0.948761	-1.1884	-0.052808	0.50965	-0.217503	0.478207	-0.312795	-0.424469	-0.00735393	-0.485666	0.429136	0	0	-0.602445	-0.60635	-0.662324	-0.129926
BRCA	TCGA-A2-A04P	TCGA-A2-A04P-01A-31R-A034-07	-2.01449	-0.78703	-0.141514	1.03807	0.360628	0.434194	-0.506765	0.491224	0.218232	-0.858006	0.94306	0.186349	-0.131023	0.0258105	0.174339	0.295264	-0.0188067	0.246705	0.338082	-0.697113	-0.435305	-0.246787	-0.254867	1.034	0.789342	0.23517	0.281092	0.00670424	0.200138	0.097358	0.280546	0.412818	0.286459	0.326583	-0.240514	-0.765461	0.0527668	0.613338	1.69057	0.221869	1.03976	0	0	0.360628	0.832074	0.817647	0.605816
BRCA	TCGA-A2-A04Q	TCGA-A2-A04Q-01A-21R-A034-07	-1.05987	0.421029	0.872148	0.561094	2.10193	0.869545	-0.27231	-0.593392	-0.50588	0.68727	1.35414	-0.0506724	-0.107637	-0.190058	0.176996	0.649411	-0.2218	-0.173152	0.491637	-0.652553	-0.00578589	-0.369855	-0.983696	0.211526	0.723174	0.541566	-0.0223342	0.0262036	-0.21164	0.0914342	0.869886	0.349066	-0.481498	0.447853	-0.115901	0.154718	-0.158001	-0.262859	0.636856	0.0220205	0.881079	0.195058	0.515928	2.10193	2.05136	1.89333	1.84267
BRCA	TCGA-A2-A04R	TCGA-A2-A04R-01A-41R-A109-07	-0.896902	0.862889	0.855069	-1.37004	-0.587207	-0.642949	-0.00902226	NA	NA	NA	0.402174	-0.236705	-0.105538	-0.231165	0.209456	-0.462048	-0.585004	-0.0858962	-0.210145	-1.299	-0.830472	-0.79499	-1.71574	-0.0463401	1.78797	-0.0911355	-0.249778	0.0269898	-0.249062	0.116807	-0.913192	-0.120515	-0.312974	-0.739238	-0.678335	-1.633	-0.763661	-1.21313	0.262737	1.45842	0	0	0	-0.587207	-1.64615	-2.09708	-1.74819
BRCA	TCGA-A2-A04T	TCGA-A2-A04T-01A-21R-A034-07	1.61774	0.599332	1.48468	-0.0762108	0.830045	-1.21609	-1.5742	0.0639533	-0.708525	-0.38965	0.398269	-0.102906	-0.335637	-0.224352	0.40111	0.283163	1.25273	-0.504811	0.0558694	-0.155393	-0.0971124	0.871406	-0.193644	0.278456	1.87713	-0.18923	-0.13011	-0.27371	-0.356177	0.377866	0.13412	1.78518	-0.810218	-0.275691	0.571256	-0.0718763	1.63161	0.795123	0.842546	1.33576	0	0	0	0.830045	1.23018	0.923145	1.42903
BRCA	TCGA-A2-A04U	TCGA-A2-A04U-01A-11R-A115-07	-3.07168	0.675311	0.702342	-0.40868	-1.85271	1.13927	-1.50118	-0.776268	-0.525281	-1.05153	0.960093	-0.0713049	-0.496028	0.0968184	0.147298	0.264496	1.2393	-0.628211	-0.805126	-0.813482	-0.747725	-0.492601	-0.314165	1.17422	1.33691	0.236428	-0.0619786	-0.507963	0.23362	0.0474035	0.149325	1.6475	-1.06215	-1.31747	-0.364697	-1.43141	-0.353435	0.468603	1.78266	0.984607	0	0.426051	0	-1.85271	-0.899782	-0.276528	-1.06143
BRCA	TCGA-A2-A04V	TCGA-A2-A04V-01A-21R-A034-07	0.154689	0.0441525	-0.0671371	-1.13256	-1.07111	0.526028	0.078733	-0.88821	-1.29838	-0.716246	0.377947	-0.127581	-0.155013	-0.359056	0.13963	-0.0482748	-0.721733	-0.199441	-0.196227	-0.526165	0.0792344	-0.883923	-1.49017	-0.014135	0.870181	-0.101505	-0.104263	-0.081157	-0.54535	0.0392786	-0.163295	-0.196138	-0.62985	-0.621427	0.325336	-0.00417095	-0.873708	-0.757578	0.334727	0.200081	0	0	0	-1.07111	-0.788935	-0.651179	-1.17628
BRCA	TCGA-A2-A04W	TCGA-A2-A04W-01A-31R-A115-07	-0.115257	-0.77546	0.120413	1.80197	-1.0021	0.297596	0.500074	0.156481	-0.72715	0.118801	1.06684	0.489616	-0.280339	0.211798	-0.0632524	0.00823899	-0.395296	0.530622	0.433377	0.177171	-0.440534	0.663059	0.600608	0.56901	0.0301647	0.371394	0.700695	-0.180167	0.433389	-0.204402	-0.0733592	-0.0653817	0.775554	0.416756	1.32175	-0.701798	1.39459	1.64593	1.1569	-0.566833	0	0.258305	0	-1.0021	-0.31084	-0.826884	-1.45229
BRCA	TCGA-A2-A04X	TCGA-A2-A04X-01A-21R-A034-07	0.0021271	-1.1074	0.505735	-0.946073	0.953594	-0.826866	-0.786102	NA	NA	NA	0.184167	-0.128803	0.0524099	-0.229821	0.218483	-1.06922	-0.476824	0.572804	-0.147569	-0.350445	0.377494	0.00353526	-0.561718	0.392912	0.554951	-0.23339	-0.10582	0.257697	-0.281514	0.139786	-1.83886	0.155851	0.836452	-0.580582	0.675835	0.876292	0.398485	0.243665	0.84984	0.0227343	0	0	0.486901	0.953594	1.26511	1.093	0.757717
BRCA	TCGA-A2-A04Y	TCGA-A2-A04Y-01A-21R-A034-07	-0.00312389	-0.377431	0.403713	0.279954	-0.22335	-0.286124	-0.0226381	0.437045	-0.374977	-1.02766	0.583573	0.0921397	0.264996	-0.126438	0.259522	-0.523274	-0.115992	0.263195	0.598706	-0.487753	0.0516871	0.227844	-0.766544	0.899033	0.721517	-0.0525219	0.165938	0.447436	-0.100076	0.183345	-0.910752	0.690101	0.400408	0.345151	0.225745	0.0735089	0.73508	0.0678162	1.44067	0.0285561	0	0.415579	1.34339	-0.22335	0.27675	0.435531	0.120589
BRCA	TCGA-A2-A0CK	TCGA-A2-A0CK-01A-11R-A22K-07	-0.0524857	0.728888	-0.48768	-1.60059	-0.919189	0.431357	-0.0155675	-0.372517	-1.77811	-0.157747	0.912897	0.0326613	0.132051	0.105057	0.0423834	0.413074	-1.15245	-0.0240354	0.0465645	-0.871849	0.449639	-0.790742	-1.04021	-0.135393	-1.02005	0.205973	0.0606181	0.258624	0.273404	-0.0859313	0.66993	-0.699936	-0.244869	-0.252093	-0.285212	0.793519	-0.653626	-0.370768	0.260798	-1.82288	0	0	0	-0.919189	0.360183	0.6406	-0.582738
BRCA	TCGA-A2-A0CL	TCGA-A2-A0CL-01A-11R-A115-07	0.537398	0.0635995	0.853698	0.893848	1.90152	0.154657	1.12588	-0.0368869	0.577885	-0.54421	1.04803	0.0303503	-0.0191832	-0.016341	0.223627	0.417749	-1.03231	-0.379707	0.84824	-0.941814	0.0126076	-0.687218	-1.29073	-0.89855	0.52993	0.340115	0.108335	0.132974	0.0323284	0.163571	0.586826	-0.507579	-0.971935	0.817678	-0.346629	0.049784	-0.525738	-0.529913	-0.731924	-0.305368	0	1.18875	0	1.90152	1.79109	1.9958	1.70393
BRCA	TCGA-A2-A0CM	TCGA-A2-A0CM-01A-31R-A034-07	1.25531	1.80923	1.38136	0.867664	2.30477	0.153454	-0.440082	-0.302017	0.115898	0.410187	0.626302	0.035414	-0.187662	0.0764899	0.379647	0.186536	0.632852	-0.410373	-0.075696	-0.800989	-0.578963	-0.220563	-0.227071	-0.425817	2.35966	0.0124001	0.05766	-0.097041	0.152804	0.360958	-0.0216951	1.19966	-0.721518	-0.469879	-0.293397	-0.917569	0.0329032	0.525135	-0.140051	1.7293	0	0	0	2.30477	1.04726	1.04433	1.01384
BRCA	TCGA-A2-A0CO	TCGA-A2-A0CO-01A-13R-A22K-07	-0.629924	1.36614	-1.74593	0.197088	0.82302	0.883896	0.558348	NA	NA	NA	1.81823	0.232132	0.134389	0.670504	-0.231075	0.871491	-2.06097	0.0552755	0.532715	-0.840089	0.448663	-0.907	-0.859186	-0.816371	-2.44672	0.764042	0.382141	0.332176	1.12857	-0.453438	1.3252	-1.61854	-0.207845	0.537624	-0.106245	0.828015	-0.831689	0.0149657	-0.58611	-3.12417	0.256726	0	0	0.82302	1.52202	1.2714	0.592968
BRCA	TCGA-A2-A0CP	TCGA-A2-A0CP-01A-11R-A034-07	0.962502	0.0130837	-2.413	-0.756846	-0.662465	0.972774	0.559884	0.0618924	-1.36969	0.219192	1.54649	0.214003	0.0956683	0.103763	-0.225563	0.519419	-1.12648	-0.0880994	0.132644	-0.4421	0.348904	-0.450294	-0.512905	0.43563	-1.07925	0.632899	0.347106	0.271384	0.255534	-0.4546	0.806409	-0.83427	-0.468627	-0.0971473	0.675628	0.755354	-0.249462	0.349024	1.00834	-2.04484	0.377209	0	0	-0.662465	-0.221313	-0.650051	0.102186
BRCA	TCGA-A2-A0CQ	TCGA-A2-A0CQ-01A-21R-A034-07	0.603471	-1.58055	-0.448212	-0.990595	-0.568624	-0.719286	-1.26596	-0.768874	-0.565021	-0.492391	-0.0538581	-0.166681	0.0324802	-0.42458	0.0154214	-0.571367	-0.127258	0.783965	-0.331885	-1.00425	-0.201267	-0.619165	-0.487604	0.574137	-0.556757	-0.415098	-0.204111	0.142219	-0.567026	-0.123963	-0.941203	0.576802	1.47263	-0.802323	-0.474599	-0.319539	-0.481453	0.438772	1.09161	-1.25332	0	0	0.85277	-0.568624	-0.273145	-0.944121	-1.67906
BRCA	TCGA-A2-A0CR	TCGA-A2-A0CR-01A-11R-A22K-07	0.371185	-0.0615348	-0.957476	-1.54525	-0.82624	1.24634	-0.325967	-0.184831	-0.182111	0.409369	1.52141	0.139922	0.258733	0.258691	-0.221108	0.338799	-0.947139	0.357696	-0.41903	-0.648384	0.262791	-0.995717	-0.538224	0.989564	-2.2972	0.624948	0.251866	0.531587	0.487588	-0.423003	0.502554	-0.531608	0.276935	-0.735166	0.102596	0.498157	-0.966252	0.382721	1.63061	-2.59526	0.271159	0	0.583189	-0.82624	2.12705	2.44732	0.725257
BRCA	TCGA-A2-A0CS	TCGA-A2-A0CS-01A-11R-A115-07	0.93944	-1.87912	-1.09194	-0.73658	-0.898842	0.289596	-0.632347	1.61849	-0.758174	1.17794	0.0905478	-0.135568	-0.167149	-0.517547	-0.157644	-0.0458304	-1.05081	0.259053	-0.265962	-1.08786	0.00349203	-0.137108	-0.981473	0.419928	-0.471759	-0.254534	-0.149118	-0.0574606	-0.712369	-0.353668	-0.0434361	-0.686812	0.388926	-0.761574	-0.482754	0.102239	0.200857	-0.475186	0.897992	-1.25485	0	0	0	-0.898842	-0.978935	-0.524679	-0.623078
BRCA	TCGA-A2-A0CT	TCGA-A2-A0CT-01A-31R-A056-07	-0.991202	1.18055	-0.337895	0.762142	-0.550239	-1.09261	-0.410192	-0.245535	-0.869846	-0.683333	-0.51799	0.00558968	-0.144783	-0.309108	0.0900725	0.0108314	-0.329463	-0.010692	0.228886	-0.967714	-0.00271871	-0.301798	-1.24473	0.265272	1.47396	-0.785135	0.0607951	-0.0544647	-0.334717	-0.0522136	0.114212	0.272715	-0.0647083	-0.0999958	-0.221318	0.0828725	0.0139042	-0.555604	0.68103	1.03553	0.597714	1.5394	0	-0.550239	0.0843669	-1.44723	-1.05518
BRCA	TCGA-A2-A0CU	TCGA-A2-A0CU-01A-12R-A034-07	-0.921901	-0.347441	-0.0653634	-0.468142	0.172447	-0.399583	0.0866419	0.371206	-0.0289194	-0.380595	-0.176416	-0.0557062	-0.0816368	0.0830961	0.107284	-0.0355075	-0.873583	0.324297	0.600475	-0.0619093	0.291028	-0.0921992	-0.023073	-0.311714	0.403866	-0.576388	-0.0278367	0.0310285	0.187945	-0.00511017	-0.1632	-0.345615	0.425953	0.388509	1.11786	0.436972	0.3512	1.17904	-0.031223	-0.393296	0.237813	0	0	0.172447	-0.930444	-0.819141	-1.20748
BRCA	TCGA-A2-A0CV	TCGA-A2-A0CV-01A-31R-A115-07	-0.00320569	0.234571	-3.46124	0.877316	0.168835	0.209268	0.290336	-1.06319	-1.24941	-0.637607	0.907827	0.206502	0.329917	0.0771393	-0.147711	0.503053	-1.1462	0.401105	0.58208	-1.127	0.166236	-0.626639	-1.2033	-0.28246	-0.757982	0.179684	0.323278	0.577784	0.17908	-0.364962	0.827019	-0.787723	0.708069	0.471905	-0.640366	0.549111	-0.55658	-0.530263	0.0723511	-1.78531	0	0	0.981167	0.168835	0.389753	0.560679	-0.122679
BRCA	TCGA-A2-A0CW	TCGA-A2-A0CW-01A-21R-A115-07	-2.95179	-0.996156	0.423823	0.671721	0.530575	-1.77458	-1.15583	0.524701	0.203714	-0.280218	-0.342199	-0.220551	-0.536869	0.0162892	0.238219	-0.848934	0.277644	0.80652	-0.20277	-0.491562	-0.302762	-0.0994371	-0.896074	0.1082	0.834718	-0.651591	-0.280607	-0.595046	0.0600328	0.171533	-1.57464	1.00812	1.49106	-0.694481	0.208714	-0.610527	0.337463	-0.0953453	0.508828	0.386933	0	1.43704	0	0.530575	0.288446	0.208612	0.0489389
BRCA	TCGA-A2-A0CX	TCGA-A2-A0CX-01A-21R-A00Z-07	0.207452	0.714066	0.480404	0.269596	0.705256	0.133741	0.485249	0.0242541	-0.499784	-0.130282	1.20106	0.33765	-0.244516	0.095911	0.166523	0.184515	0.0434871	0.0160283	0.518555	-0.371927	-0.114064	0.284067	-0.257664	-0.0546001	1.0931	0.421926	0.542088	-0.177044	0.293419	0.0813101	0.155169	0.577432	-0.152022	0.339805	0.365626	-0.339541	0.840758	0.760028	0.342233	0.615096	0	1.50067	0	0.705256	0.337127	0.274585	0.667884
BRCA	TCGA-A2-A0D0	TCGA-A2-A0D0-01A-11R-A00Z-07	-2.6798	0.824973	1.31154	0.589579	0.360566	1.51226	-2.75144	-0.71731	-0.844804	-1.29164	1.60441	-0.0373919	-0.369174	-0.252938	0.259394	-0.0575356	1.89544	-0.26555	-1.05334	-0.546239	-0.616027	0.649499	0.198917	0.631913	1.6622	0.678276	-0.015101	-0.274104	-0.303487	0.219458	-0.454495	2.23867	-0.544082	-1.79289	-0.0467943	-1.09986	1.30511	1.18325	1.12228	1.24633	0	0	1.27242	0.360566	1.16223	0.180856	-0.140568
BRCA	TCGA-A2-A0D1	TCGA-A2-A0D1-01A-11R-A034-07	-1.77259	-2.9122	0.846581	0.41021	-1.0608	-1.31116	-0.931016	-0.0150957	1.48812	-0.12037	0.203367	0.0409367	-0.268696	-0.0440807	0.137676	-0.239848	0.236146	0.255054	-1.09239	-0.937651	-0.604302	-0.888691	-1.19878	0.24259	0.94771	-0.210379	0.120113	-0.169551	0.0292069	0.039059	-0.615611	0.594286	0.356308	-1.67199	-0.374975	-0.975444	-0.875889	-0.645323	0.65624	0.463488	0	0	0	-1.0608	-0.787805	-0.882862	-1.81361
BRCA	TCGA-A2-A0D2	TCGA-A2-A0D2-01A-21R-A034-07	-1.48816	0.51919	1.35338	0.593111	-0.12371	0.735939	-1.10974	-1.00518	-1.94172	-0.430862	1.4917	-0.00717408	-0.296407	-0.122183	0.317556	0.176966	0.930216	-0.678497	-0.439327	-0.348893	-0.662016	0.43109	-0.241418	-0.15227	2.20136	0.515711	0.0541648	-0.147441	-0.125134	0.278926	-0.0650972	1.26648	-1.14577	-0.921225	0.451626	-1.16688	0.991249	0.789289	0.221196	1.56672	4.70933	1.57534	0.497445	-0.12371	0.816729	0.627952	0.255502
BRCA	TCGA-A2-A0D3	TCGA-A2-A0D3-01A-11R-A115-07	1.35922	-0.0513402	-2.36312	2.21082	0.210624	-1.74219	-0.618965	0.681772	-0.49619	0.295399	-0.401656	-0.195531	-0.185886	-0.444636	-0.0956185	-0.591438	0.0340851	0.769599	-0.542563	-1.66291	0.405903	-0.232375	-1.06686	-0.693675	0.622089	-0.670557	-0.30927	-0.130036	-0.640431	-0.300788	-1.10495	0.977584	1.62578	-1.28267	-1.46643	0.958497	0.0518877	-0.367926	-0.472819	0.0178668	0	0	0	0.210624	0.631982	0.150691	-0.622425
BRCA	TCGA-A2-A0D4	TCGA-A2-A0D4-01A-11R-A00Z-07	-0.53025	-0.177293	0.128244	0.477441	-0.850931	-1.09253	-0.338869	1.38043	1.36105	-0.762238	-0.390001	-0.171508	-0.0348718	-0.0667069	0.232047	-0.998576	-0.023071	0.467132	-0.270435	-0.962469	-0.250514	0.106366	-1.43603	0.173617	1.68502	-0.685651	-0.162163	0.128949	-0.0112411	0.158721	-1.79967	0.653925	0.792073	-0.874629	-0.324268	-0.63583	0.599719	-0.561525	0.56272	1.33611	1.0997	1.17405	0	-0.850931	-1.32249	-1.91853	-1.62718
BRCA	TCGA-A2-A0EM	TCGA-A2-A0EM-01A-11R-A034-07	0.464352	-0.722962	-0.843675	-0.818268	0.194107	-0.17757	0.188784	NA	NA	NA	0.0687504	-0.146636	-0.0984286	-0.139114	-0.0180971	-0.030881	-1.00731	-0.242316	0.0720802	-0.5757	0.461484	0.0347614	-0.942176	-0.285414	1.05786	-0.332385	-0.151619	0.0415702	-0.161391	-0.169537	-0.0797093	-0.701489	-0.701889	-0.362174	0.258133	0.824913	0.451564	-0.117669	0.0877364	0.477418	0	0	0	0.194107	-1.14782	-0.920091	-0.934509
BRCA	TCGA-A2-A0EN	TCGA-A2-A0EN-01A-13R-A084-07	0	-0.698289	-0.751382	1.68549	1.01639	1.2592	1.06148	NA	NA	NA	1.40501	0.211304	-0.0809095	0.341986	-0.0329646	0.391123	-1.84581	-0.287727	0.90972	-0.423271	0.435481	-0.266317	-0.450613	-0.406725	-0.327527	0.570753	0.364748	0.0437407	0.610949	-0.184505	0.669118	-1.57703	-0.910249	0.925329	0.525452	0.905524	0.0739448	0.464585	-0.0578502	-1.42908	0.209826	0	0	1.01639	1.11571	1.3545	0.973183
BRCA	TCGA-A2-A0EO	TCGA-A2-A0EO-01A-11R-A034-07	0.332539	0.590643	-0.730536	0.056618	-0.0331482	0.373432	1.0489	0.537954	-0.558684	1.20704	1.45015	0.158242	0.061806	0.0626446	-0.0202767	0.45921	-1.62298	-0.192185	0.545278	-0.886357	0.119927	-0.408981	-1.23291	-0.517143	0.40829	0.543746	0.271048	0.273906	0.153589	-0.179998	0.803505	-1.56731	-0.589986	0.432354	-0.160945	0.162557	-0.10507	-0.423321	-0.223385	-0.622952	0.225415	0	1.15527	-0.0331482	-0.384408	0.138473	0.156553
BRCA	TCGA-A2-A0EP	TCGA-A2-A0EP-01A-52R-A22U-07	-0.232602	0.458889	-0.514272	0.631264	1.46762	2.12021	0.770581	0.816164	0.691389	0.602627	2.08339	0.36815	0.151038	0.424893	-0.0189058	0.614063	-1.89273	-0.616857	0.897535	0.2005	0.544433	-0.193636	-0.0657775	-0.419447	-1.94989	1.07728	0.562669	0.275818	0.760012	-0.152162	1.04934	-1.44461	-1.32478	1.04641	1.35671	0.989482	0.215973	1.04335	-0.0675339	-2.47066	0	0	0	1.46762	1.92172	2.0046	1.50367
BRCA	TCGA-A2-A0EQ	TCGA-A2-A0EQ-01A-11R-A034-07	0.995382	-0.747325	1.49144	0.553706	1.53296	0.335092	-0.416105	0.686861	0.0449014	-0.570513	0.346373	-0.0350078	-0.0223685	-0.374068	0.294907	0.179574	0.583277	0.284055	0.307796	-0.681206	-0.228227	0.276143	-0.0515215	0.429433	1.18702	-0.0863285	-0.0333583	0.0927129	-0.493225	0.251433	0.113279	1.26121	0.269875	0.033152	-0.152573	-0.472881	0.885768	1.15151	0.923308	0.596838	0.444001	0.58455	0.548463	1.53296	1.61127	1.66975	0.897515
BRCA	TCGA-A2-A0ER	TCGA-A2-A0ER-01A-21R-A034-07	-1.00409	-1.0311	0.617914	-0.4509	-0.796686	-1.48763	-0.685624	0.186768	1.80708	0.839582	-0.841217	-0.143597	-0.226389	-0.547785	0.165405	-0.850976	-0.528356	0.0735571	0.031739	-0.390475	0.248473	0.323555	-1.29025	-0.355742	1.44955	-1.009	-0.140193	-0.0829203	-0.756885	0.0697819	-1.56975	0.0924611	0.0802307	-0.449088	0.681286	0.279651	0.973538	-0.529269	-0.0488976	1.00068	0.193729	0	0	-0.796686	-0.833741	-0.545664	-0.763639
BRCA	TCGA-A2-A0ES	TCGA-A2-A0ES-01A-11R-A115-07	-0.341931	0.968158	-1.14048	0.156779	-0.0365027	0.514978	0.838185	-0.578637	-0.165775	-0.246024	0.837837	0.19072	0.249272	0.356241	-0.0304432	0.84117	-1.97328	-0.0971507	1.22105	-0.928045	0.463266	-0.833223	-1.45544	-1.21618	0.350368	0.119442	0.327527	0.458477	0.629214	-0.190487	1.31634	-1.84439	-0.407158	1.42531	-0.122424	0.966942	-0.744058	-0.721728	-1.06706	-0.72003	0	0	1.85391	-0.0365027	0.0404343	0.224493	0.19536
BRCA	TCGA-A2-A0ET	TCGA-A2-A0ET-01A-31R-A034-07	0.659713	0.322825	-0.387282	-1.67411	-0.41181	-2.32203	-0.990955	NA	NA	NA	-1.12528	-0.523679	-0.111068	-0.95603	0.138476	-1.16266	0.462787	-0.23929	-0.853135	-1.9282	-0.67297	-0.559888	-2.31596	-0.863267	1.13999	-1.15664	-0.730305	-0.01706	-1.42246	-0.0119101	-2.13651	1.30571	-0.555406	-1.80543	-2.13542	-1.43468	-0.488118	-1.99331	-0.662728	0.740354	0	0	1.82315	-0.41181	-0.361178	0.0437454	-1.55342
BRCA	TCGA-A2-A0EU	TCGA-A2-A0EU-01A-22R-A056-07	0.560076	0.46618	-0.505012	-0.00934814	0.323818	-0.639634	-0.247402	0.120871	1.01501	0.148191	-0.273674	-0.113358	0.225547	-0.240613	0.164305	0.0495828	-0.711846	0.275893	0.86043	-0.35505	0.269371	-0.36508	-0.979113	0.0235601	1.57652	-0.553291	-0.0898326	0.425337	-0.27195	0.0584999	0.032972	-0.21296	0.443614	0.714853	0.813436	0.532356	-0.132356	-0.127222	0.397529	1.03125	0.896473	1.64663	0	0.323818	-1.73527	-0.592144	-0.683461
BRCA	TCGA-A2-A0EV	TCGA-A2-A0EV-01A-11R-A034-07	-0.354258	-1.85051	-0.207048	-0.940339	0.483721	0.144183	0.34265	0.593898	-0.263582	0.170544	0.808744	-0.123631	-0.0169077	-0.202339	0.132828	-0.188991	-1.35505	0.267498	0.51363	-0.523221	0.301067	-0.287143	-0.979978	-0.43812	0.520178	0.147318	-0.107059	0.167993	-0.300887	0.0268957	-0.352404	-1.06796	0.486197	0.362979	0.282423	0.559859	-0.0149175	-0.202233	-0.11259	-0.374498	0.911977	0.317927	0	0.483721	-0.115112	0.31959	0.336387
BRCA	TCGA-A2-A0EW	TCGA-A2-A0EW-01A-21R-A115-07	-0.369182	0.778598	-0.944621	0.289917	0.482021	0.730913	1.20267	0.424306	1.10844	0.359369	1.39163	0.15493	0.151949	0.290329	-0.0345555	0.686687	-2.07049	-0.297017	1.27882	-0.664273	0.830497	-0.319442	-0.917768	-0.810639	-0.010886	0.539057	0.256237	0.337645	0.537683	-0.19466	1.05883	-2.0673	-0.84239	1.48331	0.23128	1.65867	0.0584484	-0.108235	-0.55944	-1.13349	0.532428	0	0	0.482021	0.165959	0.156646	1.06038
BRCA	TCGA-A2-A0EX	TCGA-A2-A0EX-01A-21R-A034-07	-0.0175195	0.976502	-1.42269	-0.399169	-0.660883	0.264838	0.714606	-0.575465	-0.871468	0.0892487	1.07334	0.0955011	-0.0610167	-0.111468	-0.152864	0.451089	-0.259469	0.129659	0.247742	-0.75297	0.35816	-0.201754	-0.476836	0.0173192	0.692509	0.322317	0.173622	0.0942529	-0.0801732	-0.357683	0.879115	0.325962	0.102255	-0.0548924	-0.143672	0.625088	0.135062	0.361601	0.425916	-0.0895057	0	0	0.574303	-0.660883	-0.650885	0.351243	-0.259791
BRCA	TCGA-A2-A0EY	TCGA-A2-A0EY-01A-11R-A034-07	0.422462	-1.28022	0.40606	0.393614	-0.0322636	-0.964565	-0.24906	0.340361	-0.242726	0.464501	0.0360363	-0.122631	-0.538079	-0.184831	0.0970554	-0.142393	-0.479427	0.408595	0.392571	-0.755878	0.286287	-0.051046	-0.84368	-0.459066	0.582612	-0.327542	-0.145141	-0.590542	-0.302254	-0.00966785	-0.315488	0.106691	0.776452	0.145758	0.0290871	0.677733	0.331274	0.180005	-0.179542	-0.106058	0.229302	1.52019	0.493166	-0.0322636	0.375875	0.129866	0.0975396
BRCA	TCGA-A2-A0ST	TCGA-A2-A0ST-01A-12R-A084-07	1.19474	1.16071	0.782517	0.291054	2.18346	1.5027	-0.241586	-0.439426	0.608717	0.499664	0.706251	0.0590634	0.0337227	0.381847	0.231478	0.932916	0.184098	0.116152	0.815471	-0.270333	-0.305016	-0.609164	-0.350387	-0.627137	0.452534	-0.000225166	0.10512	0.198945	0.64621	0.158806	1.38185	0.726814	-0.0595462	0.819606	0.673968	-0.423765	-0.458122	0.609557	-0.330554	-0.395029	0.261895	3.52513	0	2.18346	2.09783	2.09715	2.20265
BRCA	TCGA-A2-A0SU	TCGA-A2-A0SU-01A-11R-A084-07	-0.124474	0.262012	-0.412085	0.0254617	-1.14286	0.215204	-0.0577837	-1.39932	-1.90784	-1.10934	0.896574	-0.0812249	-0.095289	0.00688771	0.0842742	0.543145	-0.425237	-0.114325	0.314366	-0.861778	0.0476405	-0.199351	-0.877296	-0.136786	0.571055	0.206031	-0.060073	0.0466449	0.105999	-0.0498633	0.76649	0.0523525	-0.294137	0.0945548	-0.293007	0.0377871	0.109486	0.139288	0.270004	-0.239573	1.43379	0	0	-1.14286	-0.445428	0.199681	0.0812984
BRCA	TCGA-A2-A0SV	TCGA-A2-A0SV-01A-11R-A084-07	0.474068	1.06148	-0.0314411	0.118229	0.0721105	0.641501	-0.460871	-0.548265	0.701836	-1.15949	0.859345	0.339076	-0.201002	-0.297727	0.246863	-0.239654	-0.266276	0.125488	0.126641	0.266589	0.16779	0.717764	0.435495	0.697171	0.667578	0.208936	0.441833	-0.117006	-0.383352	0.183759	-0.46395	0.362538	-0.0043389	-0.144062	1.49846	0.336732	1.40321	1.39918	1.21331	0.0180745	1.03661	1.0493	0	0.0721105	-0.127331	0.0649517	0.762164
BRCA	TCGA-A2-A0SW	TCGA-A2-A0SW-01A-11R-A084-07	-0.130715	-1.75906	0.892061	-0.752454	0.642831	-0.042963	-0.0829607	-0.646143	0.631169	-1.07831	0.633512	-0.10068	-0.241878	-0.18467	0.187997	-0.604357	-0.816596	0.378779	0.359647	-0.0898081	0.260033	0.794407	0.274649	0.668	0.779243	0.055605	-0.0847603	-0.180403	-0.231925	0.122995	-1.06939	-0.381167	0.562343	0.308003	1.03983	0.457066	1.63397	1.37325	1.21861	0.224173	0	0	1.32843	0.642831	1.49435	1.11565	0.651405
BRCA	TCGA-A2-A0SX	TCGA-A2-A0SX-01A-12R-A084-07	1.77024	0.782822	1.69992	0.838334	1.39287	0.669049	0.1239	-0.750475	-0.683074	-0.26767	1.2781	0.019001	-0.0788507	0.480036	0.342309	1.11401	-0.441135	-0.178569	1.09744	-0.12778	-0.0727716	-0.321985	-0.0708426	-1.34843	1.42208	0.428242	0.0501489	0.0535256	0.773698	0.318477	1.68551	0.0928587	-0.371656	1.26918	0.805924	-0.145355	0.0498577	1.1502	-1.23171	0.491081	0	0	0	1.39287	1.44012	1.22687	0.892458
BRCA	TCGA-A2-A0SY	TCGA-A2-A0SY-01A-31R-A084-07	-0.0618552	0.38208	-0.331449	-0.453904	0.0960516	0.66847	0.64145	NA	NA	NA	0.907552	0.167838	0.137991	0.00857035	0.0920704	0.577143	-0.603773	-0.237247	0.526932	-0.56085	0.705316	-0.380503	-0.505287	-0.322139	0.375053	0.189507	0.250332	0.305076	0.0806011	-0.0265644	0.906972	0.0200818	-0.745716	0.315463	0.380907	1.41739	-0.0822875	0.491163	-0.0125504	-0.561643	0	0	0.472772	0.0960516	0.42078	0.68893	0.69531
BRCA	TCGA-A2-A0T0	TCGA-A2-A0T0-01A-22R-A084-07	0.977689	2.05546	0.204942	0.283723	-0.53481	1.28275	-0.947775	1.56916	1.12386	0.981662	1.36356	0.292599	-0.212955	0.209708	0.215777	0.370123	0.862283	-0.533326	-0.0996142	-0.529902	-0.628297	0.678751	0.484619	0.681447	2.13298	0.409343	0.469647	-0.0682622	0.45091	0.146119	0.3569	1.33977	-0.888671	-0.35252	0.15963	-1.05426	1.35396	1.66218	1.23046	1.61929	5.9425	2.58207	5.12687	-0.53481	0.280441	0.30359	0.327931
BRCA	TCGA-A2-A0T1	TCGA-A2-A0T1-01A-21R-A084-07	0.580147	-1.14941	0.343088	0.108733	1.28203	0.921124	0.380853	0.067194	0.919669	0.821038	1.21633	0.162734	-0.344043	0.179693	0.0858965	0.223839	-0.890404	0.260049	0.442806	-0.160301	0.00709363	0.472813	-0.564779	0.167468	-0.153834	0.517304	0.308018	-0.265548	0.368959	-0.0195922	0.379138	-0.439901	0.205751	0.395251	0.822115	0.230951	1.10726	0.282712	0.627663	-0.951766	0	0	0.884278	1.28203	1.52559	1.64663	1.28443
BRCA	TCGA-A2-A0T2	TCGA-A2-A0T2-01A-11R-A084-07	0.460639	-0.806906	-0.164537	0.134485	-1.25024	0.840679	-0.737102	1.60774	0.26417	0.290726	0.857137	0.250314	-0.371123	0.118186	-0.0185747	0.182026	0.487574	0.48343	-0.0134988	0.295422	-0.255808	0.352719	0.697318	0.800497	0.798171	0.0998236	0.413496	-0.210838	0.254587	-0.159456	0.0976468	0.921835	0.68313	-0.211931	1.28044	-0.423006	0.877752	1.64081	1.4582	0.189072	1.11689	5.37638	0	-1.25024	0.133703	-0.0490817	0.172252
BRCA	TCGA-A2-A0T3	TCGA-A2-A0T3-01A-21R-A115-07	-2.22574	0.853751	0.656356	-1.21229	-0.580811	-0.879256	-0.152998	-0.431489	0.261004	0.103185	0.668651	-0.161023	-0.152038	0.367388	0.378543	-0.105439	-0.0882796	-0.120047	0.0214877	-1.47887	-0.137381	-1.02213	-1.84815	-0.678645	1.75185	0.0168461	-0.171647	-0.101612	0.611996	0.341728	-0.323569	0.472301	-0.233112	-0.407382	-1.21177	-0.247265	-1.02235	-1.3742	-0.481827	1.29171	0	0	0	-0.580811	-0.561293	-0.580459	-1.23295
BRCA	TCGA-A2-A0T4	TCGA-A2-A0T4-01A-31R-A084-07	-0.286717	0.593525	0.735851	-1.10344	0.0429014	1.03461	0.777971	0.0606527	-0.814192	0.277711	1.16842	0.124903	0.131676	0.0945132	0.165066	0.429947	-1.53952	-0.311947	0.939402	-0.141293	0.571641	-0.0555876	-0.638876	0.0634709	0.0523483	0.40565	0.200782	0.282415	0.248362	0.0815653	0.739581	-1.39042	-1.02563	0.983496	1.0939	1.2097	0.427158	0.416845	0.45663	-1.05415	0.500887	0	1.07727	0.0429014	0.401669	0.500478	0.427166
BRCA	TCGA-A2-A0T5	TCGA-A2-A0T5-01A-21R-A084-07	1.32719	0.838429	-0.542016	1.13683	-0.348692	-0.10145	-0.263336	0.119575	-1.1903	-0.297225	0.871597	0.0363308	-0.0861081	0.258008	0.13259	0.486512	0.216303	0.271298	0.297157	-1.14636	0.147772	-0.242731	-0.533546	-0.335142	0.780938	0.149874	0.0878526	0.063817	0.499627	0.0300454	0.681383	0.942094	0.507223	0.0761351	-0.331488	0.461651	0.0776491	0.468075	-0.0429872	-0.0915506	0.228656	0	1.42299	-0.348692	-0.778911	-0.79113	-0.576057
BRCA	TCGA-A2-A0T6	TCGA-A2-A0T6-01A-11R-A084-07	-0.0738433	0.32999	-1.50684	0.57748	0.717143	0.81967	1.32307	0.343843	-0.780119	-0.133901	1.13007	0.108875	-0.0319052	-0.0228255	-0.0652267	0.660961	-1.94612	-0.457393	0.559204	-0.936412	0.442566	-0.485649	-1.3917	-1.22032	0.342282	0.42685	0.205689	0.058867	0.027896	-0.241002	1.11074	-1.95	-1.18965	0.4707	-0.239281	0.885138	-0.252696	-0.705913	-1.07209	-0.728389	0	0	0	0.717143	0.48929	0.555857	0.583652
BRCA	TCGA-A2-A0T7	TCGA-A2-A0T7-01A-21R-A084-07	0.4397	0.0598771	0.385487	0.62362	-0.0150527	0.0880607	0.332359	-0.718094	-0.895735	-0.649453	1.10858	0.0996529	0.0548926	0.305259	0.172873	1.23303	-1.26811	-0.135253	1.21	-1.01525	0.0107567	-0.464024	-1.16426	-0.74012	0.70803	0.284455	0.179275	0.216313	0.519477	0.0791269	2.02937	-0.946391	-0.304409	1.38873	-0.294732	0.04256	-0.253944	-0.596148	-0.533739	-0.35777	0.186632	0	0.401394	-0.0150527	-0.107304	-0.163604	0.138657
BRCA	TCGA-A2-A0YC	TCGA-A2-A0YC-01A-11R-A109-07	-0.725204	-0.597515	-0.326595	-0.939628	0.258376	-0.339828	0.0900424	-0.125104	0.185137	0.721205	0.396974	-0.0435731	-0.0876304	-0.0593809	0.10983	-0.398941	-0.975356	0.198022	0.454171	-0.827632	0.414428	-0.369765	-1.12276	-0.53363	0.297126	-0.138001	0.0116282	0.0333096	-0.0132147	-0.0149626	-0.729256	-0.494043	0.268837	0.210212	-0.256099	0.613265	-0.076875	-0.360834	-0.2394	-0.60865	0.331478	0	0	0.258376	-0.23863	-0.089364	-0.41379
BRCA	TCGA-A2-A0YD	TCGA-A2-A0YD-01A-11R-A109-07	0.417475	-0.0609179	-0.442556	0.413755	1.52132	0.708682	1.23573	0.891312	-0.372041	1.64854	1.45966	0.229894	0.156933	0.407149	0.0285362	0.495997	-2.16815	-0.121001	0.758799	-0.944044	0.248457	-0.778119	-1.27901	-1.3107	-0.302179	0.607309	0.381219	0.334828	0.707807	-0.110151	0.792701	-2.38592	-0.466477	0.786706	-0.466911	0.408739	-0.706432	-0.625882	-1.19588	-1.55336	0.205334	0	0	1.52132	0.296048	0.340857	0.432534
BRCA	TCGA-A2-A0YE	TCGA-A2-A0YE-01A-11R-A109-07	-3.47208	-1.21028	0.491129	0.802429	-0.595596	-0.914172	-1.25297	0.894998	0.591854	0.39288	0.571718	-0.0422557	-0.52597	-0.0326958	0.242938	0.866926	-0.507105	-0.227518	0.119473	-1.335	-1.18171	-1.46899	-0.164619	-0.988164	1.29722	-0.0158554	-0.0301389	-0.483719	0.0131984	0.178108	1.20867	-0.172508	-0.40997	-0.0597841	-1.27827	-2.22294	-1.75744	0.686153	-0.817138	0.614887	0	4.31359	0	-0.595596	0.0924147	-0.594768	-0.650834
BRCA	TCGA-A2-A0YF	TCGA-A2-A0YF-01A-21R-A109-07	0.392154	0.0296748	0.651102	1.00636	-0.0843977	-0.72748	-0.173861	-0.399363	-0.503143	0.593038	-0.00177662	-0.193699	-0.218467	-0.0731493	0.175136	-0.498761	-0.839004	0.582806	0.412445	-1.66802	-0.0956285	-0.502609	-1.8303	-0.504795	1.47197	-0.427497	-0.187317	-0.159503	0.00286231	0.0796128	-0.892538	-0.325086	1.15793	0.0811472	-1.52769	-0.263431	-0.329828	-1.27826	-0.203745	1.00865	0	0	1.80234	-0.0843977	-1.32376	-0.900983	-0.982537
BRCA	TCGA-A2-A0YG	TCGA-A2-A0YG-01A-21R-A109-07	-2.15429	-1.14595	1.09352	0.0775992	-0.427351	-1.53188	-0.372235	0.444426	0.655705	0.0323882	0.320888	-0.292869	-0.475169	0.0353951	0.342725	-0.393939	-0.0640527	0.65051	0.169082	-1.41302	-0.421592	0.638226	-1.09656	-0.459296	1.60544	-0.219586	-0.373431	-0.441918	0.130083	0.295494	-0.815521	0.651261	1.23885	-0.147908	-1.31066	-0.960375	1.32908	-0.415085	-0.121353	1.21484	0.208664	0	0	-0.427351	-0.739425	-0.852779	-0.382266
BRCA	TCGA-A2-A0YH	TCGA-A2-A0YH-01A-11R-A109-07	0.349697	0.370294	0.516149	0.730362	1.30812	-0.208222	-0.10568	0.0979239	1.94093	-0.548195	0.852866	0.0524878	-0.138246	-0.607503	0.114222	0.352189	-0.441065	0.033816	0.656444	-0.11	-0.342106	-0.251545	-0.711354	-0.155613	0.633537	0.254282	0.118719	-0.00725407	-0.883781	-0.00682311	0.484005	0.225046	-0.204378	0.461008	0.722145	-0.715558	0.0103412	-0.0937304	0.215261	-0.0228313	0	0.320627	1.61358	1.30812	0.828525	0.581061	1.61386
BRCA	TCGA-A2-A0YI	TCGA-A2-A0YI-01A-31R-A10J-07	0.0441906	-0.486109	-1.38889	1.28344	0.339271	-0.0153043	0.754052	0.128303	-1.50616	-1.16042	0.731373	0.0645449	-0.16655	0.0752362	-0.0477404	0.394453	-1.13094	0.218757	0.973638	-1.07429	0.196199	-0.72818	-1.42404	-0.816611	0.251182	0.0356361	0.173574	-0.0999147	0.168849	-0.229692	0.750409	-0.751257	0.303562	0.927908	-0.454107	0.296324	-0.62632	-0.651593	-0.567805	-0.702814	0.191919	0.382069	1.92863	0.339271	0.464443	0.856191	0.850282
BRCA	TCGA-A2-A0YJ	TCGA-A2-A0YJ-01A-11R-A109-07	-1.17507	1.53445	0.558375	0.242222	0.0941452	0.988128	-2.02517	-0.234331	0.785618	0.0406414	0.295844	-0.053705	-0.555844	0.189105	0.0701801	-0.525412	0.434835	-0.0184004	-0.326945	-0.413659	-0.90047	-0.0954361	0.443381	-1.17433	1.95342	-0.270458	-0.00548975	-0.506855	0.233187	-0.0410957	-1.29799	0.964897	0.0639963	-0.789512	0.293441	-1.58532	0.295097	1.65716	-1.02138	1.49343	5.39971	0.204094	0	0.0941452	-1.47382	-1.80725	-0.397015
BRCA	TCGA-A2-A0YK	TCGA-A2-A0YK-01A-22R-A109-07	0.132517	0.260875	-0.540376	1.14898	1.12912	0.609733	0.972859	-0.0483918	0.729547	-0.122325	1.12823	0.121286	-0.00485392	0.480366	0.0241909	0.937702	-1.72767	-0.385348	1.06362	-0.712802	0.546743	-0.469673	-1.52456	-1.13358	-0.240543	0.32516	0.237177	0.155313	0.832079	-0.110609	1.55319	-1.37302	-0.975979	1.1611	0.197245	1.04679	-0.165954	-0.870584	-0.920715	-1.34367	0	0	1.16105	1.12912	1.48471	1.51501	1.13145
BRCA	TCGA-A2-A0YL	TCGA-A2-A0YL-01A-21R-A109-07	0.199928	1.00349	0.1357	-0.52705	0.853374	0.247382	0.791804	-0.0189872	-0.933831	-0.373344	1.01231	0.0539938	0.0869883	0.310953	0.158466	0.889997	-1.01413	0.00990075	1.08245	-1.3012	-0.0164307	-1.10597	-1.45137	-1.00119	0.56239	0.256233	0.120226	0.258586	0.546484	0.0707204	1.48402	-0.726343	-0.221993	1.12273	-0.86646	-0.0686753	-1.15326	-0.778285	-0.78249	-0.463346	0.204332	0	0.783089	0.853374	0.301212	0.412422	0.261377
BRCA	TCGA-A2-A0YM	TCGA-A2-A0YM-01A-11R-A109-07	0.14152	1.61979	1.87686	1.18707	0.705779	1.23657	-1.34979	-0.673262	0.84411	0.0210169	0.737984	0.207174	-0.310479	0.0727049	0.407541	0.610098	0.832303	-0.155612	0.138717	-0.422843	-0.503353	-1.1791	0.119075	-1.35331	1.76693	0.0316702	0.305469	-0.177579	0.142054	0.406392	0.61105	1.43434	-0.268313	-0.0606431	0.375678	-0.669122	-1.21343	1.02318	-1.28047	1.12943	0	0	0	0.705779	0.236144	-0.023072	0.861915
BRCA	TCGA-A2-A0YT	TCGA-A2-A0YT-01A-11R-A109-07	0.244881	-0.296477	0.955988	0.753743	-0.228524	-0.933029	0.015061	-1.61408	-0.960007	-2.34862	-0.344724	-0.00682062	-0.376751	-0.383646	0.291428	-0.494341	0.160477	0.512378	0.309833	-0.24958	0.143923	0.6661	-0.358192	-0.176473	1.47586	-0.68637	0.018541	-0.361596	-0.535346	0.221808	-1.02452	0.860118	1.02327	-0.0318445	0.680102	0.0977625	1.38839	0.740632	0.121905	1.00136	0	0.354488	0	-0.228524	-0.909063	-0.372076	-0.205332
BRCA	TCGA-A2-A1FV	TCGA-A2-A1FV-01A-11R-A13Q-07	-1.10855	1.30059	-0.417527	0.967501	-1.51296	-0.429367	0.975455	-0.212327	0.664949	-0.606092	0.245838	-0.187437	-0.283575	-0.141079	0.143977	-0.196278	-0.45532	-0.624332	0.744646	-1.84734	0.201198	-1.05066	-2.29217	-0.744944	1.72783	-0.179659	-0.206096	-0.213716	-0.128836	0.0319284	-0.320487	0.0327118	-1.21786	0.604818	-1.55558	0.367617	-1.05775	-1.37505	-0.509808	1.23274	3.29291	0	0	-1.51296	-0.457467	-1.55183	-0.8464
BRCA	TCGA-A2-A1FW	TCGA-A2-A1FW-01A-11R-A13Q-07	0.511881	0.331304	1.25283	0.959204	-0.321742	-1.72165	0.212102	-0.39182	-1.12929	-1.1961	-0.075053	-0.196154	-0.0488449	-0.563305	0.302244	-0.618968	-0.50397	-0.0120788	0.136657	-1.3481	-0.0978052	-0.379944	-1.31787	-1.02679	1.4047	-0.440761	-0.258476	0.096904	-0.80942	0.220788	-1.2809	-0.0470543	-0.0709379	-0.346344	-1.02038	-0.424295	-0.152314	-0.562349	-0.912982	0.974803	0.342592	0	0	-0.321742	-0.572463	-0.640319	0.120316
BRCA	TCGA-A2-A1FX	TCGA-A2-A1FX-01A-11R-A13Q-07	0.614184	0.0255144	0.406212	-0.431416	-0.295569	-0.56431	0.195348	-1.06083	-0.771759	-1.14268	0.451487	-0.238681	0.0212919	-0.0473213	0.236825	-0.236131	-0.498761	-0.194036	0.0628243	-1.09386	-0.305314	-0.54815	-1.72811	-0.353023	1.28446	-0.0579441	-0.229941	0.167819	0.0314684	0.163414	-0.367547	0.111085	-0.564197	-0.37658	-0.541974	-0.77028	-0.416356	-0.996726	-0.0706408	0.771516	0	0	0	-0.295569	-0.326128	-0.292422	-0.448253
BRCA	TCGA-A2-A1FZ	TCGA-A2-A1FZ-01A-51R-A14D-07	0.209125	-0.618668	-0.420686	-0.497048	-0.305278	0.284925	0.678211	-0.350758	-0.0182567	1.7475	0.904887	0.00311362	0.0942088	0.25065	0.035514	0.25792	-1.91501	0.176183	0.578707	-0.852491	0.797597	-0.475098	-1.21873	-0.914536	0.481035	0.179926	0.0519799	0.228161	0.453545	-0.0916851	0.417423	-1.87937	0.208008	0.513056	-0.0763661	1.60377	-0.214948	-0.488316	-0.665853	-0.506741	0	0.20702	0	-0.305278	-0.163385	-0.0800815	0.193262
BRCA	TCGA-A2-A1G0	TCGA-A2-A1G0-01A-11R-A13Q-07	-0.489524	0.710986	-1.20683	-0.69088	0.283363	-0.268724	1.15727	0.465379	-0.314848	-0.621612	0.258148	-0.0484138	0.00293978	0.203051	-0.00495569	0.225156	-1.54424	0.0504878	0.647233	-0.871682	0.54396	-0.711045	-1.7123	-1.14673	0.31718	-0.25634	0.00990867	0.137834	0.370459	-0.178315	0.275729	-1.50054	0.0535743	0.431903	-0.081645	0.961444	-0.58946	-0.983778	-1.00703	-0.597351	0	0	0.799202	0.283363	0.426263	0.163298	0.487577
BRCA	TCGA-A2-A1G1	TCGA-A2-A1G1-01A-21R-A13Q-07	-1.88919	0.445385	1.18523	1.11813	1.72379	1.19192	0.168422	-0.311811	1.36787	0.176979	0.682437	0.231691	-0.12224	-0.0158109	0.366312	0.144733	0.319351	-0.209433	0.556635	-0.0504863	-0.678476	-0.145727	0.434192	-0.588036	2.25504	0.0775798	0.388059	0.074869	0.0430176	0.34981	0.108796	0.807121	-0.417836	0.535858	0.873783	-1.15159	0.107935	1.84593	-0.274658	1.65869	0	0.909079	0	1.72379	-0.0525511	0.139853	1.30558
BRCA	TCGA-A2-A1G4	TCGA-A2-A1G4-01A-11R-A13Q-07	-0.829776	-0.109363	0.954139	-1.14543	-0.212525	-1.44968	-0.648891	0.0470959	-0.0354267	-1.34806	-1.00419	-0.155427	-0.0832647	-0.444157	0.262213	-0.800008	0.340813	0.141405	-0.152914	-1.19426	-0.068348	-0.623672	-1.03632	-0.832296	1.65744	-1.08141	-0.152585	0.033764	-0.635473	0.196208	-1.40036	1.16301	0.21025	-0.720157	-0.629749	-0.284662	-0.403273	-0.202015	-0.64394	1.3374	0	0	0	-0.212525	-0.33467	-0.824942	-1.08525
BRCA	TCGA-A2-A1G6	TCGA-A2-A1G6-01A-11R-A13Q-07	0.29343	0.54845	-3.2167	-0.148126	-0.0508303	0.543796	-0.194034	-0.0256947	-0.159999	-0.317732	0.734892	-0.0455323	-0.0168239	0.366486	-0.0959132	0.855389	-1.3685	-0.505957	1.07316	-0.973885	0.54743	-0.643557	-1.75116	-0.815542	0.449759	0.0581033	-0.0306701	0.161483	0.648826	-0.300774	1.37167	-0.940247	-1.02347	1.20694	-0.132428	1.24847	-0.465372	-0.933578	-0.54878	-0.525302	0.62336	0	0.808336	-0.0508303	-0.514316	0.153012	0.47494
BRCA	TCGA-A2-A259	TCGA-A2-A259-01A-11R-A16F-07	1.54626	1.09685	-1.01665	0.816403	1.49263	-0.263417	0.439974	0.0660149	0.511175	0.269573	0.509312	0.173996	0.130709	0.166032	0.0567312	0.593296	-0.350684	-0.15466	1.25741	-0.779632	0.343914	-0.722121	-0.77363	-0.643263	1.30506	-0.0850731	0.316432	0.313581	0.313232	-0.0907645	0.885803	0.249917	-0.455893	1.23431	-0.0838219	0.499154	-0.634611	0.144585	-0.423664	0.581516	0	0	0	1.49263	0.0539619	0.368486	0.827656
BRCA	TCGA-A2-A25A	TCGA-A2-A25A-01A-12R-A16F-07	0.154442	0.474467	-0.191118	0.138042	0.699984	0.976413	1.53161	-0.135582	-1.37405	-0.0992802	1.39862	0.192542	0.27314	0.602772	0.182144	0.994732	-1.62975	-0.688405	1.14602	-1.03155	0.00873915	-1.11902	-1.31371	-0.863901	0.668917	0.51866	0.331849	0.555552	1.03711	0.0978292	1.73933	-1.41169	-1.55145	1.28002	-0.348217	0.176859	-1.21413	-0.532025	-0.624639	-0.493898	0.27471	0	0.322779	0.699984	0.137742	0.564468	0.504758
BRCA	TCGA-A2-A25B	TCGA-A2-A25B-01A-11R-A169-07	0.234352	-0.113411	0.834671	-0.35527	0.852648	0.226519	0.354126	-0.428965	-0.951528	-0.759557	-0.00266289	-0.0405093	0.0206831	-0.234981	0.397558	-0.476979	-0.212901	0.0397183	0.380752	-1.80411	-0.883618	-0.344051	-1.65214	-0.304497	2.54139	-0.349783	0.0179702	0.211864	-0.352347	0.384521	-0.841478	0.360068	-0.0558434	0.0497018	-1.63605	-1.74593	-0.19116	-1.10146	-0.0158315	2.40303	0	0	0.46819	0.852648	-0.300178	-0.304137	0.882724
BRCA	TCGA-A2-A25C	TCGA-A2-A25C-01A-11R-A169-07	0.978109	-0.615079	1.36587	-0.569015	0.654554	-0.888057	1.09609	-1.49492	-0.861189	-1.44961	0.260936	-0.207214	0.108607	-0.0328173	0.342821	-0.196628	-1.12663	0.0771344	0.382795	-1.58515	-0.661595	-0.503574	-1.93523	-1.22925	1.52039	-0.254351	-0.2099	0.301159	0.0107223	0.305095	-0.263427	-0.908835	0.0627594	0.0756942	-1.18323	-1.23887	-0.32592	-1.39817	-1.08879	1.08123	0.619918	0	0.315281	0.654554	-0.366329	0.0451564	0.0638812
BRCA	TCGA-A2-A25D	TCGA-A2-A25D-01A-12R-A16F-07	-0.534306	1.74928	-0.386717	0.26208	1.02569	-0.098694	-0.232509	-1.51534	0.0238126	-1.00415	0.783367	0.199752	0.0457573	-0.0147567	0.0421865	-0.0652965	0.650174	0.323041	0.149094	-0.29591	0.795236	0.427262	-0.595836	0.809635	0.631156	0.168266	0.299734	0.184856	0.0855825	-0.0924504	-0.170547	1.4491	0.441191	-0.176539	0.546123	1.34552	1.04179	0.289447	1.36715	-0.0477968	0	0	0	1.02569	1.27975	1.28289	0.932105
BRCA	TCGA-A2-A25E	TCGA-A2-A25E-01A-11R-A169-07	-0.193238	0.781875	0.28344	0.275972	-0.602944	-0.828882	0.528493	-0.265099	1.88984	-0.125485	-0.139145	-0.0428517	-0.0414447	-0.439525	0.304446	-0.38114	0.0168022	-0.0910215	0.628773	-0.978738	0.289299	-0.528577	-1.43972	-0.309033	2.25626	-0.441464	-0.0207357	0.089377	-0.631847	0.250537	-0.721144	0.908022	-0.236636	0.346214	-0.320545	0.408926	-0.380828	-0.570638	-0.000374708	1.9552	0.201095	0	0	-0.602944	-0.367768	-0.393737	-0.821842
BRCA	TCGA-A2-A25F	TCGA-A2-A25F-01A-11R-A169-07	-0.289282	0.263619	1.20831	1.2009	2.82416	1.16305	0.973459	-0.671984	-0.185845	-0.632304	1.64146	0.140556	-0.0347299	-0.0371808	0.273055	0.372456	-0.414447	-1.12908	0.983941	-0.0115785	0.244639	0.0329331	-0.251113	-0.785134	1.62687	0.749403	0.251966	0.0817489	-0.0510418	0.23195	0.508526	0.0232795	-1.8506	1.05999	1.09046	0.659063	0.486274	0.959065	-0.524969	0.878536	0	0	0	2.82416	1.42044	2.08236	2.76428
BRCA	TCGA-A2-A3KC	TCGA-A2-A3KC-01A-11R-A213-07	0.602043	1.03669	0.316104	-0.661407	0.163108	0.262267	1.26308	-0.0517429	-1.89662	0.63523	1.29322	-0.00194077	0.0532845	0.581147	0.0813306	0.780507	-2.20675	-0.208037	0.646583	-1.20763	-0.0539685	-1.25048	-1.91267	-1.15373	-0.409544	0.434395	0.101662	0.207891	0.997364	-0.0206625	1.27825	-2.22741	-0.628329	0.632643	-0.937894	-0.182406	-1.378	-1.42586	-1.03672	-1.66096	0.533319	0	1.14702	0.163108	0.469732	0.174549	0.0244364
BRCA	TCGA-A2-A3KD	TCGA-A2-A3KD-01A-12R-A213-07	-0.850878	0.449021	0.0746334	0.494708	-0.526769	0.350376	-0.292337	-0.731255	-0.961123	0.701168	0.307902	0.0509692	-0.0993801	0.103705	0.00996099	0.223969	-1.13691	0.212304	0.461954	-0.623021	-0.0490341	-0.750061	-0.504618	-1.03039	0.272415	-0.237462	0.0895496	-0.0111764	0.222386	-0.136021	0.274649	-0.623547	0.399837	0.22636	0.18235	-0.145737	-0.500644	0.403723	-0.89026	-0.608846	0	0.155271	0.736426	-0.526769	-0.712636	-0.685024	-0.641175
BRCA	TCGA-A2-A3XS	TCGA-A2-A3XS-01A-11R-A22U-07	-1.93462	0.549594	0.209284	-0.159579	-0.819088	-0.274051	-0.557931	NA	NA	NA	0.770768	-0.0868251	-0.191806	0.463688	0.196343	0.856088	0.350748	0.0359693	0.159105	-0.779431	-0.430083	0.133863	-0.549771	0.176423	0.137554	0.074626	-0.0764105	-0.0787358	0.800059	0.116784	1.25685	0.763103	0.0526608	-0.0142451	-0.305881	-0.754514	0.598582	0.391897	0.625651	-0.495751	0.208775	0.409942	0	-0.819088	0.904981	0.707787	-0.299941
BRCA	TCGA-A2-A3XT	TCGA-A2-A3XT-01A-11R-A22U-07	0.921649	1.50183	0.644324	0.471291	0.361633	0.00258145	-1.45906	-0.997467	0.210793	-1.0922	1.30051	-0.0443679	-0.287715	0.109397	0.238111	-0.408948	1.0816	-0.202649	0.140563	0.24581	0.482607	0.965323	0.812692	0.469005	0.353067	0.39953	-0.022896	-0.221893	0.194422	0.191286	-0.941625	1.7676	-0.448303	-0.136319	1.21075	0.976581	1.77719	2.13444	0.903551	-0.136554	2.46189	0.156101	0	0.361633	0.264347	0.426944	0.586554
BRCA	TCGA-A2-A3XU	TCGA-A2-A3XU-01A-12R-A22U-07	1.63725	2.75254	-0.699586	-1.13682	-3.21033	0.704536	-4.17703	0.642589	0.164952	1.74077	0.188115	-0.157316	0.028882	0.408619	-0.0730982	-0.523759	1.75434	-0.0319038	-1.30738	-0.1276	0.0362709	0.15515	1.12621	2.13806	0.734974	-0.256559	-0.21464	0.139561	0.703214	-0.243809	-1.28858	2.08553	-0.123154	-2.07978	0.508269	0.0215131	0.612133	2.60828	2.96643	0.472925	0.429587	0	0	-3.21033	-0.720292	-0.920365	-2.74483
BRCA	TCGA-A2-A3XV	TCGA-A2-A3XV-01A-21R-A239-07	-0.660517	-0.147654	-0.636786	0.192097	-2.3316	-0.711108	-1.49219	0.239367	0.844271	0.698366	0.458158	-0.252126	-0.702719	-0.380654	-0.281091	-1.90595	0.81453	0.556564	-1.68712	-0.757914	0.759849	1.05788	1.11655	2.86652	-0.61388	0.074215	-0.337955	-0.728758	-0.511545	-0.518433	-3.27823	1.12845	0.729136	-2.65397	-0.030009	1.37598	1.99077	2.40913	3.89802	-0.724316	0	0	0	-2.3316	0.0219948	-0.12556	-1.22026
BRCA	TCGA-A2-A3XW	TCGA-A2-A3XW-01A-11R-A239-07	0.297651	2.18755	-0.970614	-1.60087	-0.993809	1.06738	-1.42611	-0.393993	-0.94943	-0.578813	1.00045	0.0407739	-0.116172	0.398035	-0.361252	1.20555	-0.301471	0.542723	-0.93922	0.230804	0.080715	-0.608978	-0.325127	0.692028	-2.54487	0.229734	0.0980111	0.0751852	0.719345	-0.605233	2.21042	0.120781	0.683304	-1.29154	2.08236	0.495818	-0.376792	0.476092	1.23664	-2.5856	0.393968	0	0	-0.993809	1.15755	0.66189	-0.361573
BRCA	TCGA-A2-A3XX	TCGA-A2-A3XX-01A-21R-A239-07	1.61752	1.68675	0.334332	-0.0556303	-0.815491	0.0745326	-1.44546	-0.186684	0.0493726	1.11391	0.793049	0.00569094	-0.264624	0.227599	0.236227	0.760242	0.874204	-0.0398855	0.284247	0.0996745	0.0302715	0.434941	0.754302	0.301291	0.700401	0.0345908	0.0405969	-0.208612	0.367934	0.173236	0.912011	1.42428	-0.0606234	0.134493	1.13184	0.109855	1.04799	2.20716	0.794173	0.189925	5.29226	1.89081	3.32739	-0.815491	0.863217	0.286484	-0.217416
BRCA	TCGA-A2-A3XY	TCGA-A2-A3XY-01A-11R-A239-07	-1.45201	0.887243	1.98077	0.666989	1.11674	1.45217	0.171069	NA	NA	NA	2.3241	0.334035	-0.212025	0.631971	0.232418	1.15012	-0.731056	-0.611092	0.621011	0.371158	0.3472	0.44841	-0.0883804	0.00660975	0.130155	1.06693	0.520583	-0.109581	1.0435	0.174467	1.61787	-0.36819	-1.08452	0.616705	1.6932	0.83838	1.16366	0.895296	0.490192	-0.520557	1.81463	1.89135	4.19232	1.11674	1.1384	1.14414	0.612393
BRCA	TCGA-A2-A3XZ	TCGA-A2-A3XZ-01A-42R-A239-07	-0.36185	-0.972362	0.0317143	0.530161	0.318484	-0.326167	-1.06323	-0.510115	0.101718	0.822762	0.907779	0.0340817	-0.083146	0.179916	0.157638	0.0655365	0.0696471	0.57452	0.153962	-0.1389	0.203885	0.597531	0.181161	-0.0566475	-0.563253	0.23616	0.0685698	0.0414088	0.307945	0.0442981	0.00687118	0.725384	1.01428	0.0340523	0.838063	0.405671	1.34391	1.44772	0.359995	-1.20472	1.03785	0	0	0.318484	1.77085	1.3971	0.132941
BRCA	TCGA-A2-A3Y0	TCGA-A2-A3Y0-01A-11R-A239-07	-1.20867	0.775447	0.783819	0.0141747	1.16169	-0.938343	-2.25763	NA	NA	NA	0.112413	0.205985	0.0267263	-0.00289621	0.252835	0.0631325	1.90351	0.727421	-0.257217	0.89416	0.0311874	0.679083	1.96173	1.08698	0.186359	-0.269409	0.332393	0.266053	0.0894663	0.201702	-0.0373352	2.11878	0.958192	-0.54765	2.38566	0.130689	1.3816	3.74445	1.74923	-0.173076	3.623	5.25281	6.20556	1.16169	1.93524	1.17183	0.163303
BRCA	TCGA-A2-A4RW	TCGA-A2-A4RW-01A-21R-A266-07	-0.188479	0.051306	-0.901643	-0.520608	-0.481825	0.184258	0.393294	NA	NA	NA	1.09706	-0.0786042	-0.141368	0.369042	0.00729407	0.685886	-1.70122	-0.042675	0.27822	-0.97523	-0.228252	-0.899528	-1.27055	-1.14174	-0.577926	0.368709	-0.056969	-0.0597091	0.654356	-0.135806	1.04115	-1.4453	-0.177657	0.0743201	-0.269032	-0.384616	-0.77131	-0.555257	-1.02354	-1.65836	0	1.9153	0	-0.481825	0.642284	0.372556	0
BRCA	TCGA-A2-A4RX	TCGA-A2-A4RX-01A-11R-A266-07	0.981604	0.793804	-0.162092	2.00486	0.0574119	1.76369	0.455373	0.522427	-1.76694	0.0497503	2.01047	0.426258	0.136568	0.610033	0.226326	1.24604	-1.17131	-0.638927	0.742906	-0.058631	-0.277971	-0.405794	-0.55935	-1.17778	0.611584	0.872566	0.642829	0.371264	1.02979	0.168268	2.059	-0.768729	-0.964633	0.895466	1.06626	-0.302688	-0.193377	0.242023	-0.940518	-0.265142	0	0	0	0.0574119	0.707752	0.483104	0.411755
BRCA	TCGA-A2-A4RY	TCGA-A2-A4RY-01A-31R-A266-07	0.151807	0.859014	-1.55802	-0.378121	0.0269685	0.132024	0.471358	-0.0949512	-1.31199	2.64033	1.04748	0.044823	0.0553854	0.68345	-0.0671837	1.05567	-2.05844	-0.15928	0.632147	-0.960726	0.332048	-1.13699	-0.996492	-1.69701	-1.62431	0.272378	0.107751	0.216539	1.17343	-0.242836	1.65333	-1.82395	-0.456792	0.606989	-0.123002	0.684648	-1.167	-0.0159469	-1.66282	-2.55457	0.294288	0	0	0.0269685	0.395497	0.442018	-0.000596491
BRCA	TCGA-A2-A4S0	TCGA-A2-A4S0-01A-21R-A266-07	-0.80291	0.756245	-1.97938	0.026669	-0.533951	-1.93495	-1.06208	-0.448529	-1.04798	-1.49835	-0.743061	-0.343497	-0.373566	-0.293101	-0.268917	-0.741167	-0.583163	0.276624	-1.18707	-1.05651	-0.072241	-0.333917	-0.534522	-0.756612	-0.824069	-0.820423	-0.447928	-0.376957	-0.33682	-0.528489	-1.40936	0.0653749	0.444395	-2.05883	-0.653061	-0.30994	0.0785064	0.403105	-0.529961	-1.46641	0.828898	0	0	-0.533951	-1.45998	-1.62044	-2.33577
BRCA	TCGA-A2-A4S1	TCGA-A2-A4S1-01A-21R-A266-07	-0.377897	0.04127	-1.15412	0.633133	-2.55753	2.41999	-1.8626	1.36392	-0.0735497	1.02934	3.267	0.310998	-0.444281	0.3765	-0.236598	-0.340938	-1.704	-1.50747	-0.172675	-1.05971	-0.358668	-0.90929	-0.810494	0.2251	-1.29893	2.02329	0.540727	-0.471717	0.687527	-0.451466	-0.653595	-1.37637	-2.09563	-0.363355	-0.860566	-0.794169	-0.85795	-0.467714	0.707973	-1.42935	5.17418	1.29066	0.973665	-2.55753	-0.309294	0.501899	0.963057
BRCA	TCGA-A2-A4S2	TCGA-A2-A4S2-01A-12R-A266-07	-0.167786	0.209645	-1.20515	-0.574823	1.70867	-0.519773	0.154949	-0.187665	-2.0297	0.994219	0.944047	0.0562649	-0.0345044	0.209237	-0.109532	0.344843	-1.44513	0.404284	-0.035667	-1.21493	-0.134468	-0.989162	-0.997465	-0.987621	-1.32682	0.17554	0.113357	0.0520374	0.412172	-0.300747	0.487567	-1.22417	0.655428	-0.401758	-0.820999	-0.331555	-0.977257	-0.324717	-0.806068	-2.39433	1.367	0	0	1.70867	0.709026	0.831399	0.68559
BRCA	TCGA-A2-A4S3	TCGA-A2-A4S3-01A-21R-A266-07	-0.255745	-0.567846	1.03036	-0.131004	0.0131592	-0.930064	-0.959775	0.0485291	-0.596878	0.907976	0.37233	-0.043613	-0.428048	-0.2174	0.228648	-0.202474	-0.0810915	0.332012	0.06756	-0.455234	0.228541	0.0527356	-0.0997246	0.580555	0.765572	-0.146882	-0.0521974	-0.457012	-0.250999	0.165387	-0.474394	0.556265	0.554764	-0.291601	-0.0948485	0.236104	0.51361	0.776632	1.03515	0.352558	0.316521	0.257373	7.40597	0.0131592	1.45691	0.611991	-0.0710172
BRCA	TCGA-A7-A0CD	TCGA-A7-A0CD-01A-11R-A00Z-07	-0.677616	0.904511	-0.262931	-1.82481	-0.321033	-1.23518	0.0251118	0.397166	-0.209851	0.770305	-0.301482	-0.322844	-0.109317	-0.197852	0.0647377	-0.457525	-0.772109	0.0721522	-0.314179	-1.41816	0.0542557	-0.632114	-1.5093	-0.500272	1.22471	-0.537664	-0.397252	-0.00172295	-0.220156	-0.0798631	-0.824319	-0.18596	0.11639	-0.948165	-1.14256	-0.0319067	-0.491985	-1.05145	-0.219525	0.783117	0.187772	0.461462	0	-0.321033	-1.64438	-0.25927	-0.950867
BRCA	TCGA-A7-A0CE	TCGA-A7-A0CE-01A-11R-A00Z-07	0.99408	0.616799	1.04308	0.376914	0.546386	-0.31319	-1.2341	0.752215	0.716697	1.22823	0.69858	0.173225	-0.228572	-0.0516209	0.332879	0.0348637	1.24161	-0.30226	0.437781	0.486165	0.470017	1.69932	-0.176426	0.914269	1.93256	-0.00791869	0.285689	-0.0523471	-0.0282918	0.304902	-0.158467	1.79288	-0.430877	0.373823	1.72731	1.22154	2.93044	0.790529	1.57716	1.21269	0	0	0.461707	0.546386	-0.476155	-0.25294	-0.596306
BRCA	TCGA-A7-A0CG	TCGA-A7-A0CG-01A-12R-A056-07	-0.186608	-0.950005	-0.113425	-0.0974271	0.464865	0.460295	0.924633	0.927525	-0.544558	1.39787	0.824575	0.0109115	-0.0712159	0.141953	0.0399057	0.296033	-1.20439	0.0170691	0.75874	-0.338949	0.506175	0.358509	-0.762718	-0.738151	0.711508	0.155249	0.0818775	0.0862039	0.288717	-0.0825468	0.511263	-0.896776	-0.149328	0.735083	0.640104	1.06692	0.990733	0.0265414	-0.441483	-0.106056	0	0	0.523671	0.464865	0.269175	1.06213	0.595287
BRCA	TCGA-A7-A0CJ	TCGA-A7-A0CJ-01A-21R-A00Z-07	0.0962829	0.606853	-0.878241	-0.168325	0.523783	-1.40872	-1.54302	1.51903	2.30738	0.288435	-0.401677	0.0234897	-0.185202	-0.396178	0.162827	-0.801574	0.454866	0.488216	-0.691676	-0.479712	-0.0398934	-0.318142	-0.772461	-0.0630197	1.29835	-0.681186	0.070346	-0.0855129	-0.522937	0.0561671	-1.57307	1.20869	0.743098	-1.44807	0.323984	-0.0891315	-0.127505	-0.111838	0.28035	0.949644	0.556797	0	0	0.523783	-0.424416	-0.542185	-0.228862
BRCA	TCGA-A7-A0D9	TCGA-A7-A0D9-01A-31R-A056-07	-1.08172	0.309113	-1.0038	0.10903	-1.0615	-0.491341	0.381168	0.1444	0.830511	-0.541964	0.0818292	-0.125247	-0.212079	-0.00173658	0.0186107	-0.0266704	-0.154902	-0.068678	0.326068	-0.283298	-0.0281779	0.55344	-0.954733	-0.41593	0.89486	-0.377881	-0.0873391	-0.0519023	0.0871941	-0.132249	-0.0348514	0.308841	-0.223344	0.204216	0.954226	0.106299	1.20261	-0.105558	-0.115162	0.158319	0.253556	1.24333	0	-1.0615	-0.991362	-1.10733	-1.31052
BRCA	TCGA-A7-A0DA	TCGA-A7-A0DA-01A-31R-A115-07	0.693203	0.693956	0.414086	0.197622	-0.288641	1.23918	-0.258941	0.384571	0.584005	1.07327	1.15755	0.0725048	-0.306518	0.347545	0.134479	0.823985	-0.765747	-0.222391	0.546294	-0.538772	-0.793305	-0.0200552	-1.38403	-0.798238	1.3771	0.320211	0.198631	-0.168572	0.656537	0.0521878	1.13358	-0.476791	-0.52788	0.522092	0.0531916	-1.60007	0.31119	-0.96055	-0.555706	0.667826	0.212309	0	0	-0.288641	-1.68318	-1.17662	0.44535
BRCA	TCGA-A7-A0DB	TCGA-A7-A0DB-01A-11R-A00Z-07	0.260873	-1.0848	-0.592978	-0.418829	0.12482	0.577557	0.164746	1.8179	-0.878129	0.278905	0.519504	-0.0861238	-0.121167	-0.126937	0.0135115	-0.0807922	-0.916594	0.150483	0.564568	-0.0194195	0.81165	0.539465	-0.417011	0.222032	0.532186	-0.0600857	-0.0612249	0.0152697	-0.134308	-0.126236	-0.156359	-0.463963	0.219321	0.429231	1.08063	1.591	1.30724	0.468738	0.699123	-0.307579	0	0	0	0.12482	-1.09969	-0.569467	-0.47229
BRCA	TCGA-A7-A13D	TCGA-A7-A13D-01A-13R-A12P-07	-2.14228	0.792369	1.34824	0.375085	-0.964749	1.40859	-0.338669	0.146921	-1.29386	-0.614699	1.14973	0.472757	-0.34468	0.380923	0.177362	0.435128	0.532529	-0.0337929	0.392303	0.380456	-0.376334	0.197195	1.10865	-0.175988	1.41547	0.343972	0.75103	-0.216646	0.650444	0.117788	0.41372	1.01293	-0.0919552	0.45871	1.93347	-0.416051	0.68213	2.39034	0.206122	0.696401	0	0.738293	0	-0.964749	-1.59035	-1.5341	-0.37947
BRCA	TCGA-A7-A13E	TCGA-A7-A13E-01A-11R-A12P-07	0.174502	1.53626	0.221457	-0.0600992	-0.917992	0.715391	-1.29101	0.120704	1.50448	0.161131	0.138027	-0.302645	-0.643702	0.394835	0.128418	-0.132913	0.511848	-0.0249642	-0.584723	0.00488799	-0.311158	-0.183146	0.0422689	-0.645476	1.38634	-0.34421	-0.392607	-0.66444	0.68614	0.0233581	-0.568528	1.04461	0.0343803	-1.09926	1.06194	-0.363709	0.206628	1.12602	-0.380365	0.792803	0	0.36918	0.562378	-0.917992	-0.909063	-1.56563	-0.315206
BRCA	TCGA-A7-A13F	TCGA-A7-A13F-01A-11R-A12P-07	0.374294	0.19202	0.979416	-1.11297	-0.924863	-0.601407	0.261705	-0.443322	-0.481577	-1.2146	0.0689048	-0.199405	-0.0648748	-0.237997	0.155958	-1.03224	-0.211683	0.294605	-0.243986	-0.733015	0.473818	0.200128	-1.18928	0.229214	0.783225	-0.349423	-0.200839	0.0943139	-0.27976	0.0856631	-1.71556	0.362465	0.373723	-0.622157	0.227549	1.01724	0.727034	-0.381161	0.633324	0.246994	0	0.472769	0	-0.924863	-1.59603	-1.68853	-1.19165
BRCA	TCGA-A7-A13G	TCGA-A7-A13G-01A-11R-A13Q-07	-0.307082	-2.52545	-0.782477	-1.59415	-0.503749	-1.65567	-0.305094	NA	NA	NA	-0.192854	-0.328419	-0.317647	-0.158307	0.0124495	-0.520284	-0.965999	0.288942	-0.130077	-1.16937	0.219082	-0.0840887	-1.09619	-0.54655	0.680044	-0.555656	-0.414322	-0.263119	-0.20808	-0.153126	-1.01916	-0.633394	0.624162	-0.631903	-0.726083	0.264996	0.351651	-0.515395	-0.295543	0.0725702	0.175247	0	0	-0.503749	-1.68091	-1.84455	-1.65497
BRCA	TCGA-A7-A13H	TCGA-A7-A13H-01A-11R-A22K-07	-0.125087	-0.0327442	-1.24909	-0.574922	1.06801	0.668463	-0.11451	NA	NA	NA	1.20895	-0.015052	-0.0113653	0.356415	-0.0805921	0.787535	-2.15918	0.468524	0.520049	-0.81553	0.266399	-0.968592	-0.655216	-1.03728	-1.49613	0.368492	0.015753	0.184324	0.635713	-0.259884	1.2338	-2.00223	0.84282	0.408398	-0.189918	0.270877	-0.963573	0.327938	-0.861483	-2.79158	0	0	0	1.06801	1.23175	0.722896	1.15498
BRCA	TCGA-A7-A26E	TCGA-A7-A26E-01A-11R-A169-07	-0.106965	-1.22398	-0.130374	0.207216	-0.452281	-0.537114	0.69705	0.188027	0.216733	-0.211973	0.502445	-0.0827235	-0.115687	-0.0696683	0.141132	-0.0496367	-1.06127	-0.0237138	1.11878	-1.61104	0.257745	-0.912541	-0.897345	-1.04575	1.44561	-0.0667791	-0.0633839	0.00750163	-0.0762235	0.041393	-0.11824	-0.847863	-0.162833	1.15002	-1.27398	0.453131	-0.90751	-0.0320243	-0.871366	0.982284	0	0	0	-0.452281	-1.45045	-1.16904	-0.211979
BRCA	TCGA-A7-A26F	TCGA-A7-A26F-01A-21R-A169-07	0.816234	-0.2039	1.41675	2.49007	2.04632	-0.373531	0.537092	2.11838	0.504336	0.729999	0.782476	0.359566	-0.123092	0.00807285	0.26293	0.184545	-0.366501	0.344466	1.25228	-0.748371	-0.164573	-0.449113	-0.940023	-1.70765	1.87053	0.224608	0.583238	0.0880216	0.0647193	0.223453	0.353936	0.0993328	0.376897	1.56359	0.0552933	-0.112881	-0.306309	-0.191774	-1.65791	1.20408	0	1.04807	0	2.04632	-0.184867	0.213329	1.25379
BRCA	TCGA-A7-A26G	TCGA-A7-A26G-01A-21R-A169-07	0.633769	0.0387812	1.15088	1.44741	0.802053	0.993516	1.48196	-0.76458	-0.856958	-1.02353	2.05459	0.00118556	-0.0977588	0.0545121	0.234845	0.869382	-0.846789	-0.467843	1.4933	-0.747548	-0.0836169	-0.760628	-0.484947	-1.45502	1.78935	1.01118	0.100115	0.0611601	0.125166	0.18305	1.41977	-0.538519	-0.922418	1.8444	0.25253	0.220298	-0.747636	0.985195	-1.37856	1.04366	0	0	0.690696	0.802053	0.179918	0.621671	1.05952
BRCA	TCGA-A7-A26H	TCGA-A7-A26H-01A-11R-A169-07	-0.908488	-0.690559	0.133575	-0.413761	0.24719	0.0857371	0.857095	0.982701	0.172619	-0.480817	0.706619	0.056872	0.105228	-0.126308	0.230137	0.16768	-1.03843	-0.0651761	1.16813	-1.04379	0.288183	-0.690058	-1.00432	-0.842128	1.09578	0.0577804	0.104289	0.274907	-0.181486	0.14547	0.235935	-0.836534	-0.384901	1.17495	-0.451657	0.428251	-0.575683	-0.161521	-0.63447	0.459021	0.170597	0	0	0.24719	0.797364	-0.00842606	0.294663
BRCA	TCGA-A7-A26I	TCGA-A7-A26I-01A-11R-A169-07	0.467244	-0.184276	1.94893	0.642501	0.819293	0.316759	0.485955	0.97665	1.56425	0.653794	0.821885	-0.029731	-0.225723	-0.202725	0.356825	0.0310641	-0.149406	-0.41687	0.995677	-0.262639	-0.342862	-0.0858853	-0.00355688	-0.527808	2.35516	0.143174	0.0416737	-0.051102	-0.273831	0.338352	-0.086349	0.276096	-0.71933	1.25989	0.662786	-0.513758	0.302249	1.10774	-0.182157	1.74996	0	0	0.955703	0.819293	-2.01224	-0.991594	0.819347
BRCA	TCGA-A7-A26J	TCGA-A7-A26J-01A-11R-A169-07	0.648378	0.18517	0.839065	0.345731	0.569973	-0.730582	0.969352	NA	NA	NA	0.465413	-0.125788	-0.0242519	-0.229828	0.307089	0.285588	-1.03614	-0.290033	0.667917	-1.33779	-0.157712	-0.744468	-1.73042	-1.20281	1.64368	-0.116548	-0.136715	0.126442	-0.308908	0.236174	0.395611	-0.799442	-0.717498	0.461647	-1.01729	-0.415095	-0.703681	-1.041	-1.10642	1.25075	0.182398	0	0.392288	0.569973	-0.560782	-0.745953	0.122724
BRCA	TCGA-A7-A2KD	TCGA-A7-A2KD-01A-31R-A21T-07	-2.30702	-0.309777	0.374883	0.216197	0.40888	-0.562237	0.740674	-0.97585	-1.39325	-1.11297	0.665968	-0.0840654	-0.21251	0.0864102	0.297248	0.42524	-1.24244	-0.227936	0.953102	-1.52625	-0.438729	-1.25762	-1.36093	-0.969061	1.2259	0.0852625	-0.0451847	-0.140828	0.200374	0.235834	0.583654	-0.898002	-0.582423	0.873322	-1.28543	-0.883941	-1.40865	-0.626748	-0.792757	0.532315	0	0	0.374165	0.40888	0.850841	0.242085	0.364947
BRCA	TCGA-A7-A3IY	TCGA-A7-A3IY-01A-21R-A21T-07	0.157282	-0.0881961	-0.828665	-0.0518622	-0.340715	1.05129	-0.4582	NA	NA	NA	1.41008	0.388391	0.173988	-0.0229432	0.0347768	3.72934e-05	-0.734736	-0.0683371	0.561668	-0.431413	0.0717314	-0.34933	-0.606517	0.473409	-0.237465	0.555594	0.627518	0.381635	0.0607576	-0.100551	0.0574773	-0.119042	-0.439635	0.54172	0.469098	0.118087	-0.0321254	0.217672	0.987486	-0.939201	0	0	0.473827	-0.340715	-0.00656788	-0.272768	0.111562
BRCA	TCGA-A7-A3IZ	TCGA-A7-A3IZ-01A-11R-A213-07	-0.717464	0.897714	0.685438	-2.02446	-0.719426	-1.52999	-0.486028	-0.361253	-0.881172	-0.419027	-0.63537	-0.395803	-0.269468	-0.193371	0.113957	-0.343705	-0.873214	-0.149391	-0.400615	-1.59633	-0.175974	-0.80278	-2.22688	-0.86828	1.00935	-0.78254	-0.501712	-0.16296	-0.233571	-0.00585892	-0.654077	-0.317619	-0.377995	-0.969623	-1.54144	-0.573779	-0.673379	-1.82504	-0.745933	0.520964	0	0	0	-0.719426	-1.31271	-0.026208	-1.39367
BRCA	TCGA-A7-A3J0	TCGA-A7-A3J0-01A-11R-A213-07	0.357384	0.572064	-0.207851	-0.697865	0.346605	-0.936621	-1.48859	-0.159858	-0.226866	0.761057	-0.201774	-0.160443	-0.0655251	-0.174023	0.0479219	-0.2624	0.0472532	0.533876	-0.121794	-0.970819	-0.246106	-0.0267815	-0.573423	-0.322951	-0.465063	-0.532374	-0.21444	0.0254152	-0.132762	-0.107131	-0.694868	0.81326	0.845591	-0.664607	-0.580586	-0.517007	0.452949	0.171096	-0.00232313	-1.15039	0	1.55157	0.363267	0.346605	0.993953	0.074301	-0.59167
BRCA	TCGA-A7-A3J1	TCGA-A7-A3J1-01A-11R-A213-07	0.248972	-0.268796	-0.66979	-0.487902	1.17851	-0.0734223	0.713349	0.707059	0.259518	1.02181	0.695251	-0.136513	-0.184845	0.234083	-0.0218123	0.712031	-1.63888	0.200912	0.565737	-0.935285	0.58394	-0.868724	-1.34133	-1.03947	-1.38345	0.0670668	-0.138527	-0.13546	0.441748	-0.180221	1.12211	-1.31844	0.185849	0.38293	-0.221779	0.988349	-0.751438	-0.699218	-0.88699	-2.54199	0.307331	0	0	1.17851	1.02262	1.02331	0.787144
BRCA	TCGA-A7-A3RF	TCGA-A7-A3RF-01A-11R-A22K-07	0.154577	1.0693	-1.10929	-0.373373	-1.41775	-0.896387	-1.42755	-0.219562	-0.572462	0.194653	0.0832027	0.07212	-0.105066	-0.278839	-0.320134	-1.12176	0.0311089	0.0722881	-1.37649	0.410454	-0.0608638	0.757618	0.619815	0.553155	-1.2759	-0.264672	0.186331	-0.0175403	-0.295996	-0.571639	-1.95825	0.537682	0.0599026	-2.30454	1.62838	-0.226947	1.6228	1.92626	1.08205	-1.71669	0	0	0	-1.41775	-1.80078	-1.4658	-2.22551
BRCA	TCGA-A7-A425	TCGA-A7-A425-01A-11R-A24H-07	-0.146957	0.0520297	-0.399253	-0.271961	-1.30625	0.375835	-0.637458	-0.447558	-1.41568	-1.21632	0.987764	-0.0467929	-0.198035	0.220167	-0.0426836	0.0923831	-1.44889	0.460336	-0.133971	-0.228228	0.579419	-0.272496	-0.967986	0.244867	-1.44315	0.242473	-0.0270441	-0.120589	0.433018	-0.193051	0.0488053	-1.16256	0.723709	-0.421973	0.701061	1.07028	0.0507177	-0.289743	0.688442	-2.06649	0.844455	0.614388	0	-1.30625	0.0432553	-0.105585	-0.678561
BRCA	TCGA-A7-A426	TCGA-A7-A426-01A-22R-A24H-07	0.234842	0.471231	-1.08681	-1.20111	-0.452092	0.831425	0.196728	NA	NA	NA	1.30629	-0.0691763	0.0121151	0.520445	-0.0103634	0.755554	-1.72943	0.00916955	0.26221	-0.662304	0.478886	-0.991189	-1.1309	-0.492452	-1.69923	0.444928	-0.0370356	0.189512	0.930214	-0.154032	1.2197	-1.34392	-0.189278	0.0850189	0.207885	0.875589	-0.957898	-0.352507	-0.221373	-2.52841	1.12305	0	0	-0.452092	0.793996	0.325024	-0.169348
BRCA	TCGA-A7-A4SA	TCGA-A7-A4SA-01A-11R-A266-07	-0.171275	-0.0871636	0.105658	1.80174	0.996829	0.109319	0.586366	0.673377	-0.389341	-0.273449	0.902101	0.041865	0.0296791	0.41759	0.0800522	0.269168	-1.45761	0.166319	0.645244	-0.27427	-0.0547956	-0.341137	-0.968174	-0.576518	-0.65222	0.240047	0.0926362	0.160408	0.775631	-0.040303	0.433727	-0.886046	0.117142	0.548623	0.54192	-0.178305	-0.0377893	-0.414235	-0.337396	-1.56035	0.718032	0	0	0.996829	1.36952	1.1121	0.021843
BRCA	TCGA-A7-A4SB	TCGA-A7-A4SB-01A-21R-A266-07	-1.13644	-0.662739	-0.573853	-1.33994	-1.2819	-0.460906	0.0763493	NA	NA	NA	0.100755	-0.271618	-0.141833	0.142943	0.0588057	-0.316057	-2.18361	-0.116288	-0.517513	-2.09106	-0.409865	-1.62969	-1.56266	-0.753266	0.173614	-0.296671	-0.329387	-0.059725	0.3241	-0.0522976	-0.60292	-1.94447	-0.302088	-1.02882	-2.24624	-1.01472	-1.9699	-1.10463	-0.585967	-0.569294	0.333444	0.891648	0	-1.2819	0.502204	-0.926631	-1.0984
BRCA	TCGA-A7-A4SC	TCGA-A7-A4SC-01A-12R-A266-07	-0.155728	0.596951	-1.25334	0.833106	0.0266129	-0.19531	0.557413	1.74087	-0.562985	0.644412	0.761441	-0.122661	-0.128182	0.34459	-0.0317817	0.485511	-1.83156	0.106619	0.349588	-1.08949	0.0569565	-0.596078	-1.49597	-1.24674	-0.372259	0.122303	-0.123844	-0.0677286	0.65297	-0.186819	0.796424	-1.69757	0.0841102	0.177294	-0.602966	0.0158193	-0.381055	-0.929943	-1.12693	-1.32627	1.34015	0	0	0.0266129	0.531369	0.185837	-0.217015
BRCA	TCGA-A7-A4SD	TCGA-A7-A4SD-01A-11R-A266-07	0.828525	0.949424	0.938835	0.674982	1.4954	-0.607944	-0.79805	0.355438	-0.282419	0.849605	0.7012	0.159323	-0.0764618	-0.119606	0.159704	1.02873	-0.21691	0.239422	0.163893	0.0858385	-0.573533	0.0617723	0.1234	-0.897129	0.954772	0.097987	0.287007	0.114082	-0.14649	0.0760509	1.52222	0.274167	0.355312	0.0414936	1.0845	-1.05085	0.484338	1.1819	-0.668343	0.250924	3.65616	4.23685	0.638648	1.4954	1.65344	0.731968	0.803216
BRCA	TCGA-A7-A4SE	TCGA-A7-A4SE-01A-11R-A266-07	1.99696	1.34612	0.433402	0.347111	0.100747	0.697077	-0.233488	-0.216552	0.554577	2.45325	1.96377	0.315142	-0.276029	0.795569	0.238059	1.07121	-0.716387	-0.507688	0.660154	-0.139162	-0.668629	-0.966131	-0.16088	-1.12919	1.07926	0.874822	0.522846	-0.206529	1.34285	0.209099	1.79106	-0.266076	-0.892482	0.775785	0.903636	-1.19059	-1.00925	0.821265	-0.862533	0.268129	0	0	0	0.100747	-0.0958372	-0.236352	0.0050316
BRCA	TCGA-A7-A4SF	TCGA-A7-A4SF-01A-11R-A266-07	0.0851745	-1.4232	-0.041884	0.212898	-0.161661	-1.71282	-1.53718	0.469661	-0.260538	-0.663658	-0.572919	-0.339068	-0.315232	-0.226027	0.00922925	-0.917249	0.0959692	1.04974	-1.0591	-0.335096	0.0575966	-0.0143896	-0.987502	-0.414937	0.273738	-0.755803	-0.45014	-0.319543	-0.212811	-0.142426	-1.65974	0.683177	1.73094	-1.91714	0.257431	-0.1607	0.468852	-0.327106	-0.16894	-0.191792	0.325834	0	0	-0.161661	0.840764	0.0283499	-0.403091
BRCA	TCGA-A7-A56D	TCGA-A7-A56D-01A-11R-A27Q-07	-1.59644	-2.36389	-0.393326	-1.99824	-0.879149	1.07398	-1.45029	NA	NA	NA	1.03085	0.233524	-0.388596	-0.26135	-0.520566	-0.442272	-0.31786	0.389938	-1.76414	0.313878	-0.820967	-0.522608	0.499623	2.11822	-1.92074	0.425928	0.369701	-0.312329	-0.314574	-0.811795	-0.801081	-0.0850969	0.356608	-2.49474	1.32617	-1.53848	-0.243457	1.48661	3.08113	-2.13614	0.623644	1.43457	0	-0.879149	-0.119271	-0.653356	0.336126
BRCA	TCGA-A7-A5ZW	TCGA-A7-A5ZW-01A-12R-A29R-07	0.242055	0.532651	-2.16125	0.864819	0.169645	0.989616	0.827872	NA	NA	NA	1.68038	0.117682	0.0251637	0.230806	-0.0384125	0.588774	-1.72534	-0.337536	0.866919	-1.0222	0.436288	-0.363795	-0.901501	-0.410266	0.320173	0.715983	0.211397	0.181505	0.460687	-0.202572	0.976963	-1.83573	-0.96219	0.84463	-0.529849	0.770037	-0.104068	-0.0140097	-0.0232511	-0.695257	0.469449	0	0	0.169645	0.0508599	0.17302	-0.727869
BRCA	TCGA-A7-A5ZX	TCGA-A7-A5ZX-01A-12R-A29R-07	-0.589983	0.0280224	-3.14968	-0.231822	-0.374405	0.361421	0.672392	NA	NA	NA	1.50948	-0.0141724	0.0228056	0.423035	-0.150106	0.697808	-1.91428	-0.108613	0.46505	-1.08682	0.39421	-0.692959	-0.709378	-0.60305	-0.807011	0.584028	0.0518506	0.199779	0.784516	-0.359673	1.07892	-1.76672	-0.348753	0.346225	-0.521842	0.718004	-0.547763	0.250456	-0.33051	-1.8343	0	0.357554	0	-0.374405	-0.995342	-0.776215	0.0452779
BRCA	TCGA-A7-A6VV	TCGA-A7-A6VV-01A-22R-A33J-07	-0.908216	0.789984	0.881889	1.86036	0.290089	2.22059	-0.168322	0.649055	-0.692518	-0.0710623	2.14864	0.446083	-0.101026	0.633224	0.328576	0.815288	-0.376904	-0.47458	0.372962	0.479555	-0.132808	0.0669411	-0.293148	-0.300006	0.91952	0.973166	0.674001	0.0944299	1.09124	0.301076	1.10462	0.0788967	-0.768117	0.409141	1.76251	-0.112581	0.521542	0.434606	0.0420524	0.136105	0.410227	0.768284	0	0.290089	0.429751	0.0565275	0.456317
BRCA	TCGA-A7-A6VW	TCGA-A7-A6VW-01A-21R-A33J-07	0.907162	0.105773	1.16914	-0.850087	-0.285255	-0.138508	-2.46049	NA	NA	NA	0.73116	0.229585	0.00149319	-0.114834	0.152415	0.309654	1.34766	0.558989	-0.160028	0.158873	-0.28511	0.797656	0.814913	1.56678	0.356002	0.176803	0.346741	0.288746	-0.122738	0.0808699	0.689937	1.64349	0.729444	-0.387668	1.04252	-0.258558	1.57154	1.80535	2.34757	0.0151556	0.481047	0.226986	0	-0.285255	-0.172086	-0.137125	-0.267949
BRCA	TCGA-A7-A6VX	TCGA-A7-A6VX-01A-12R-A33J-07	-0.882495	-1.2419	0.124466	-0.269378	0.77906	-0.256529	-0.0191492	0.345577	0.162913	-0.0186798	0.363228	0.0645056	-0.156799	-0.10141	0.144387	0.365595	-0.830231	-0.0268573	0.527848	-0.408208	0.0767629	-0.371504	-0.368428	-0.209633	0.56523	-0.121944	0.0836081	-0.0955207	-0.0830918	0.0491873	0.544113	-0.412296	-0.205588	0.39097	0.415772	0.226515	-0.11493	0.562878	0.161759	-0.17298	0	0	2.35478	0.77906	-0.203465	-0.76576	-0.505981
BRCA	TCGA-A7-A6VY	TCGA-A7-A6VY-01A-12R-A33J-07	-2.05377	0.401863	0.398494	-0.0463354	1.01122	0.728898	-0.850551	NA	NA	NA	1.66302	0.341057	-0.215381	0.221286	0.256431	0.508888	-0.179325	-0.0760299	0.35824	0.244015	-0.595326	-0.163057	0.571722	-0.0615593	0.330584	0.699958	0.542122	-0.0665129	0.398706	0.215768	0.602821	0.230132	-0.161269	0.376253	1.60114	-0.933534	0.151505	1.68836	0.32731	-0.253167	0.52346	0	0	1.01122	1.32497	0.632473	1.44876
BRCA	TCGA-A8-A06O	TCGA-A8-A06O-01A-11R-A00Z-07	-0.232834	1.00481	1.09395	-0.190882	0.317601	-0.678122	0.206212	NA	NA	NA	-0.18559	-0.0694721	-0.215378	-0.514659	0.313564	-0.15176	0.244994	-0.245482	0.529666	-0.298531	0.41305	0.118771	-0.572971	0.418065	1.52144	-0.517497	-0.0874639	-0.130316	-0.783999	0.241426	-0.426311	1.23157	-0.558144	0.137753	0.670336	0.743845	0.564338	0.340496	0.849391	1.19501	0	0.17496	0	0.317601	-0.423812	0.17276	-0.0293308
BRCA	TCGA-A8-A06P	TCGA-A8-A06P-01A-11R-A00Z-07	0.734643	-0.652751	-1.02211	-0.591915	-0.323977	0.721669	0.72012	0.634619	0.196626	0.188198	0.611184	0.0515045	-0.170287	0.090553	-0.0996098	0.117321	-1.37933	-0.0204132	0.412662	-0.332109	0.262403	-0.332607	-0.942906	-0.219409	-0.0377951	0.0483698	0.154577	-0.0436911	0.184988	-0.282419	0.194308	-1.2514	-0.170901	0.212558	0.634051	0.441784	-0.0352471	-0.285535	0.122391	-1.05989	0.803671	0	0	-0.323977	-0.605683	-0.754703	-0.0899523
BRCA	TCGA-A8-A06Q	TCGA-A8-A06Q-01A-11R-A034-07	0.362383	-0.868856	0.28258	2.2652	-0.67535	-2.91472	-1.83265	NA	NA	NA	-1.70989	-0.33344	-0.680264	-0.869627	0.234865	-1.59802	1.28248	0.196573	-0.36749	-0.650147	0.164465	0.743102	0.215314	0.122456	1.90097	-1.54648	-0.517025	-0.704041	-1.39828	0.147477	-2.83688	1.99894	0.275323	-1.07698	-0.0564707	0.161251	1.58617	1.39199	0.560928	1.67337	0	0.978124	0	-0.67535	-1.14232	-1.11102	-1.19377
BRCA	TCGA-A8-A06R	TCGA-A8-A06R-01A-11R-A00Z-07	-2.1201	-1.9636	-0.328351	0.254686	0.212068	0.207961	0.666056	0.923707	1.01051	1.04123	0.996064	0.32308	-0.315719	0.307068	0.0971457	-0.37762	-0.621635	-0.120617	0.0710711	-0.437637	-0.5137	-0.405487	-0.404469	-0.113928	1.14963	0.281641	0.510576	-0.238996	0.591234	-0.010156	-0.69726	-0.215401	-0.494648	-0.153583	0.299727	-0.992867	-0.205284	0.243134	0.228414	0.471302	0.657675	4.14824	0	0.212068	0.034275	0.239474	0.364845
BRCA	TCGA-A8-A06T	TCGA-A8-A06T-01A-11R-A00Z-07	0.0114641	-0.767422	-0.269233	-1.27555	0.524103	-1.30734	-0.288043	NA	NA	NA	-0.30161	-0.316418	-0.0821818	-0.525171	0.119042	-0.404089	-0.250931	-0.0750537	-0.0367135	-0.332239	0.663874	0.59125	-1.4027	0.294557	1.15125	-0.488349	-0.398393	0.024506	-0.77348	-0.02008	-0.73839	0.376773	-0.226686	-0.569588	0.531843	1.0451	1.26412	-0.945299	0.744579	0.752429	0	0	0	0.524103	0.205693	0.311028	0.117996
BRCA	TCGA-A8-A06U	TCGA-A8-A06U-01A-11R-A00Z-07	-2.57706	-0.194617	0.107514	0.579581	0.140001	-1.26411	-0.774539	0.621507	0.0853768	-0.54	0.144114	-0.142324	-0.250282	-0.348649	0.234289	0.0798628	0.0878974	0.334028	0.501659	-0.896262	0.209474	0.327195	-0.341391	0.196402	0.941943	-0.341111	-0.173335	-0.134163	-0.48108	0.140249	0.00967421	0.82449	0.531094	0.226122	-0.41088	0.237372	0.886825	0.355297	0.619117	0.53865	0.423163	0.19648	0	0.140001	0.0291892	0.243436	0.34579
BRCA	TCGA-A8-A06X	TCGA-A8-A06X-01A-21R-A00Z-07	-0.828182	0.305989	1.08374	-1.18298	0.898921	-0.979438	-0.543087	0.42183	0.719042	0.48038	-0.121626	-0.313523	-0.193587	-0.0781895	0.185679	-0.613589	0.272237	0.275156	-0.391798	-0.892217	-0.158929	0.406732	-0.557812	0.0176304	0.901736	-0.492262	-0.400533	-0.120394	-0.0439512	0.103485	-1.08061	1.18702	0.477879	-0.963755	-0.532504	-0.369409	1.01296	0.149209	0.400404	0.457264	0.296601	0.654349	0	0.898921	0.542984	-0.113801	0.435611
BRCA	TCGA-A8-A06Y	TCGA-A8-A06Y-01A-21R-A00Z-07	0.849649	0.722121	-1.10415	1.70392	-1.66042	-1.79019	-0.806687	1.18152	1.21188	1.1924	-0.612459	-0.289811	-0.0482429	-0.153006	-0.124319	-0.279135	0.185121	0.189761	-0.553937	-0.871052	-0.0588251	0.0647675	-1.54346	-0.126741	0.797111	-0.853061	-0.404234	0.0240639	-0.124742	-0.335657	-0.60814	0.967884	0.340366	-1.2098	-0.614808	-0.299682	0.472557	-0.988054	0.267351	0.238092	0.443679	0	0	-1.66042	-1.71699	-2.00306	-2.02743
BRCA	TCGA-A8-A06Z	TCGA-A8-A06Z-01A-11R-A00Z-07	-3.17472	-1.09319	0.415365	-2.09147	-0.756131	-1.71611	-1.03791	0.804538	1.28077	-0.807737	-0.954102	-0.401187	-0.612878	-0.249609	0.046705	-1.15818	0.432448	0.737685	-0.369387	-0.763509	-0.345784	0.270975	-0.574521	0.764025	1.17281	-0.991669	-0.489229	-0.652595	-0.280735	-0.103172	-2.06248	1.3413	1.30888	-1.03319	-0.360511	-0.931089	0.827795	0.453321	1.36485	0.857619	2.1647	0	0.64823	-0.756131	-1.41124	-1.77057	-2.29667
BRCA	TCGA-A8-A075	TCGA-A8-A075-01A-11R-A084-07	-2.32935	0.020392	1.32322	0.778496	0.977789	-0.0182209	0.00118104	1.19456	0.821053	-0.157198	0.548604	0.191036	-0.424321	-0.119503	0.234431	-0.233269	-0.299257	0.0699549	0.337975	-0.0167002	-0.221477	0.0713544	-0.820329	-0.422478	1.4107	0.0634546	0.319564	-0.39838	-0.188462	0.165191	-0.49115	0.331288	0.0959349	0.00187118	0.940988	-0.573454	0.515248	-0.0730499	-0.140314	0.861831	0	0.531956	0	0.977789	0.792762	0.202355	0.576699
BRCA	TCGA-A8-A076	TCGA-A8-A076-01A-21R-A00Z-07	-0.185253	-1.03698	0.251327	1.67874	0.562484	-0.0223018	0.266093	0.244486	0.866246	0.406419	0.626979	-0.0452466	-0.256671	-0.05428	0.253995	-0.576003	-0.860275	0.243182	0.415642	-0.462961	0.176229	-0.0186971	-0.80812	-0.437393	1.28142	0.0929118	-0.0161189	-0.19795	-0.0196867	0.182728	-0.940829	-0.478109	0.433361	0.197396	0.324095	0.320952	0.372574	0.121034	-0.180516	0.745837	0.192372	0.156423	0	0.562484	-0.737715	-0.327011	0.0505926
BRCA	TCGA-A8-A079	TCGA-A8-A079-01A-21R-A00Z-07	-0.425938	0.391023	1.7214	-1.78982	-0.447547	-1.10736	-1.04786	-0.234984	-0.922444	-0.0539436	-0.145504	-0.285681	-0.416763	-0.48344	0.252593	-0.638931	0.59826	0.158202	-0.196644	-0.331605	0.0325176	-0.330301	0.00264753	0.0383128	0.749524	-0.50867	-0.37299	-0.395941	-0.659843	0.194855	-1.22284	1.45174	0.165654	-0.73283	0.381407	0.00366254	-0.0242919	1.12748	0.408289	0.314647	0.214565	0	0	-0.447547	-0.682697	-0.70196	-1.1784
BRCA	TCGA-A8-A07B	TCGA-A8-A07B-01A-11R-A00Z-07	-2.88885	0.361186	0.810337	0.951848	-0.737506	-0.632158	0.433985	NA	NA	NA	-0.158003	-0.106473	-0.337316	-0.538006	0.000230555	-0.432815	-0.179947	0.111778	-0.732686	-1.07395	-0.785314	-0.861381	-1.4338	-0.717719	1.59716	-0.381762	-0.111316	-0.229332	-0.74799	-0.152673	-0.677321	0.384876	0.0669174	-1.29994	-0.764808	-1.41976	-0.811913	-1.00755	-0.50641	1.2687	0	0	0	-0.737506	0.0927397	-0.885025	-1.6469
BRCA	TCGA-A8-A07F	TCGA-A8-A07F-01A-11R-A00Z-07	0.813298	-0.0921863	0.488201	0.22585	0.271768	-0.820135	0.489187	-0.186412	-0.0477327	-0.663785	0.436665	-0.258172	-0.120314	-0.0379851	0.158219	-0.356586	-0.943587	-0.109931	0.475298	-1.29762	-0.0437309	-0.488899	-2.34879	-1.57373	1.42013	-0.0598185	-0.303349	-0.0156963	-0.0779668	0.0495525	-0.750523	-0.569026	-0.319173	0.214436	-1.10649	-0.118703	-0.33989	-2.00838	-1.53299	0.951077	0	0.262907	0	0.271768	-0.528186	-0.36408	0.134622
BRCA	TCGA-A8-A07G	TCGA-A8-A07G-01A-11R-A034-07	-1.64262	-1.519	-0.772439	0.829506	-0.408151	0.252933	0.85969	NA	NA	NA	1.07808	0.143795	-0.380318	-0.0707465	0.0522308	0.256643	-1.23907	-0.341152	1.14336	-0.313894	0.143514	0.0277096	-0.009041	-0.297824	0.855216	0.327371	0.244104	-0.260175	-0.0488062	-0.0741578	0.397612	-1.16645	-0.95403	1.25441	0.531432	0.318519	0.454241	1.03317	0.0663295	0.0702878	1.15008	0.668845	1.58086	-0.408151	-0.346219	-0.176251	0.250133
BRCA	TCGA-A8-A07I	TCGA-A8-A07I-01A-11R-A00Z-07	-0.344448	-0.268394	0.753784	0.799176	1.33746	-0.186653	0.655019	0.70571	0.762074	1.02004	1.06451	-0.131626	-0.119006	-0.0195938	0.192987	-0.366239	-1.2636	-0.174937	-0.00256327	-1.37123	-0.492353	-0.917676	-1.77709	-1.58461	1.06725	0.33003	-0.0874463	0.00752795	0.027972	0.10704	-0.699604	-1.07264	-0.451124	-0.294011	-1.02985	-1.03658	-0.916432	-1.24302	-1.55549	0.433376	0	0	0	1.33746	0.156649	-0.118409	0.623809
BRCA	TCGA-A8-A07J	TCGA-A8-A07J-01A-11R-A00Z-07	0.152335	-1.90379	-0.900927	-0.387282	-0.0167733	1.1472	1.06899	NA	NA	NA	0.822283	-0.0907832	-0.170264	-0.0509003	-0.178845	0.0102195	-1.65571	-0.179814	0.271184	-0.62631	0.569927	-0.495112	-0.836206	-0.58589	-0.406262	0.221157	-0.0379027	-0.129493	-0.0320171	-0.381832	0.102523	-1.50323	-0.631825	0.0590276	0.196359	1.1227	-0.229308	0.147735	-0.258067	-1.43338	0.479746	0	0	-0.0167733	-0.658781	-0.259289	0.416013
BRCA	TCGA-A8-A07L	TCGA-A8-A07L-01A-11R-A00Z-07	0.876002	-0.250203	0.932761	1.19357	-0.609138	-0.736614	0.312812	NA	NA	NA	0.176186	-0.16088	-0.159377	-0.0988146	0.2938	-0.408876	0.27381	-0.618695	-0.097732	-1.19921	-0.768014	-0.654834	-0.91804	-0.218579	1.67039	-0.259553	-0.174798	-0.0679006	-0.0896897	0.248351	-0.710838	0.992256	-1.16279	-0.538449	-0.909915	-1.49691	-0.575562	-0.110863	0.0933105	1.38566	0	0	0	-0.609138	-1.17005	-1.48635	-1.02894
BRCA	TCGA-A8-A07O	TCGA-A8-A07O-01A-11R-A00Z-07	-2.10156	2.57616	1.26546	0.477227	-0.196802	-0.681614	-1.53545	-0.393647	0.388819	0.4467	0.905371	0.06323	-0.622033	-0.0451253	0.357177	0.168387	1.38943	-0.250685	0.124515	-0.453149	-0.23676	0.259958	-0.00747219	-0.397651	2.42617	0.114326	0.152159	-0.620462	-0.0677793	0.325141	-0.0592357	2.27274	-0.463272	-0.248846	0.240439	-0.406568	0.699395	0.996036	-0.136527	1.99179	5.91475	0	0	-0.196802	-0.306198	-0.559881	0.350351
BRCA	TCGA-A8-A07P	TCGA-A8-A07P-01A-11R-A00Z-07	-0.730818	-0.16459	-0.626321	-0.15394	-0.149439	-0.85268	-0.575333	0.216154	-0.715959	0.138745	-0.152715	-0.111028	-0.0136778	-0.589076	0.0172586	-0.754118	-0.166097	0.211776	0.251782	-0.581625	0.377819	0.168792	-0.72441	0.787787	1.30337	-0.513209	-0.123863	0.162062	-0.857132	-0.145592	-1.24244	0.589817	0.295532	-0.117084	0.252582	0.672226	0.666619	0.138002	1.39411	0.88937	0.386354	0	0	-0.149439	-0.94763	-0.523106	-0.0348677
BRCA	TCGA-A8-A07R	TCGA-A8-A07R-01A-21R-A034-07	0.78996	0.631834	1.59654	0.237914	0.0963236	-0.839061	-1.85551	0.56228	0.530853	0.314821	0.554441	0.0464306	-0.422656	-0.602049	0.377428	-0.0365966	1.59623	-0.594344	0.0763747	0.565179	-0.673607	1.25564	1.13862	0.50698	2.90824	-0.0639299	0.0980375	-0.259763	-0.916022	0.341444	-0.348935	2.07659	-1.01391	-0.210954	1.75247	-1.26037	2.18802	2.46078	1.0743	2.43152	5.55942	3.38292	6.47098	0.0963236	0.618158	-1.58855	0.105884
BRCA	TCGA-A8-A07U	TCGA-A8-A07U-01A-11R-A034-07	-0.816801	0.601267	1.3741	0.579372	2.74391	-0.320025	0.100753	NA	NA	NA	0.651654	0.00318033	-0.127315	-0.166561	0.19242	0.364573	0.075572	0.362002	0.49749	0.528482	-0.27852	0.542006	-0.0107417	-0.646264	0.994819	0.0773465	0.0504052	0.0688832	-0.216762	0.115263	0.446412	0.568015	0.391482	0.432018	1.76751	-0.472081	1.21935	1.17419	-0.349618	0.296642	0	0	0	2.74391	1.3088	1.35299	1.96111
BRCA	TCGA-A8-A07W	TCGA-A8-A07W-01A-11R-A00Z-07	-0.0292462	-1.0803	0.908764	-0.153112	0.111172	-0.197116	-0.0397512	0.591203	0.922773	0.036541	0.213679	0.0458162	-0.232155	-0.0663882	0.269847	-0.0955828	-0.0694799	0.222529	0.345484	-0.492191	0.11281	-0.15151	-0.663474	0.0704261	0.989285	-0.26555	0.120852	-0.165588	-0.0103575	0.199473	-0.305905	0.58551	0.306749	0.0530848	0.221282	0.127897	0.187951	0.0535003	0.421327	0.461322	1.05145	0.165015	0	0.111172	-0.189683	-0.351572	0.0537636
BRCA	TCGA-A8-A07Z	TCGA-A8-A07Z-01A-11R-A00Z-07	0.0411172	-1.39232	0.0278892	-1.854	0.495258	-0.721356	-1.89551	0.926557	0.115117	1.23397	-0.366579	-0.229526	-0.120755	-0.143454	-0.00130677	-0.652183	-0.0963233	0.609789	-0.650459	-0.369058	-0.20556	0.184608	-0.268757	0.406147	-0.553504	-0.684932	-0.255082	0.0312742	-0.127311	-0.151109	-1.16157	0.557057	1.07453	-1.34093	0.624777	-0.627724	0.704656	0.619444	0.876703	-1.12189	0.503302	0	1.08247	0.495258	-0.0120186	0.0579201	-1.26439
BRCA	TCGA-A8-A081	TCGA-A8-A081-01A-11R-A00Z-07	0.0707258	-2.63542	1.2703	0.7044	0.924599	-1.75251	-0.991283	0.509524	1.30408	-1.15563	-1.01043	-0.152031	-0.484302	-0.7117	0.27032	-0.236944	-0.113272	0.645161	0.294707	-0.128037	0.0729821	0.348355	-0.113324	0.216941	1.26566	-1.03779	-0.206667	-0.503188	-1.04084	0.195344	-0.616359	0.660356	1.11377	-0.0996815	0.864204	0.00506289	0.937617	1.12276	0.68041	0.829307	0.612634	0.138243	0	0.924599	0.756454	0.73437	0.603931
BRCA	TCGA-A8-A082	TCGA-A8-A082-01A-11R-A00Z-07	0.028668	-0.222905	1.01963	-0.171714	-0.458341	0.34995	0.0422859	0.467253	2.20174	-0.269277	0.388356	-0.0267466	-0.298553	-0.285103	0.119309	-0.510045	-0.358586	-0.057114	-0.65953	-0.602959	-0.85505	-0.742902	-1.02705	-0.901043	0.194438	-0.0491833	0.0376275	-0.220199	-0.406882	0.0189514	-0.815089	0.248797	-0.26265	-1.24386	0.16843	-1.79172	-0.564288	-0.278865	-0.743879	-0.48892	0	0	1.51124	-0.458341	-1.89371	-2.22541	-1.43351
BRCA	TCGA-A8-A083	TCGA-A8-A083-01A-21R-A00Z-07	0.175256	-1.79927	-2.20245	-2.88112	0.49567	-2.20144	-1.68966	2.24647	0.0876048	1.75222	-1.0593	-0.41513	-0.123244	-0.399974	-0.217231	-1.0127	-0.00183947	0.780712	-1.10824	-1.83812	0.300255	-0.408028	-1.55792	-0.0400037	0.0964681	-1.11521	-0.530586	-0.020856	-0.537205	-0.471898	-1.85626	0.742322	1.4643	-2.04491	-1.86273	0.352129	-0.190033	-1.08882	0.335391	-0.436526	0	0	0	0.49567	-1.46233	-0.784642	-1.93235
BRCA	TCGA-A8-A085	TCGA-A8-A085-01A-11R-A00Z-07	-0.49385	0.566605	0.707488	-1.7282	-1.90702	-0.512915	0.179111	0.32086	-0.151381	0.551148	0.068826	-0.482746	-0.501884	0.136167	0.0685694	-0.789905	-0.256483	0.162569	-0.364606	-1.20068	-0.548227	-0.546127	-1.27017	-0.0403965	1.63836	-0.264689	-0.540661	-0.450465	0.332413	-0.0527074	-1.30272	0.274585	0.296846	-0.854556	-0.612843	-1.15839	-0.400859	-0.588297	0.366808	1.2606	0.290087	0	0	-1.90702	-1.92774	-2.47878	-1.70893
BRCA	TCGA-A8-A08B	TCGA-A8-A08B-01A-11R-A00Z-07	-3.31178	0.211717	0.771604	0.785751	1.10299	-1.69319	-1.7369	NA	NA	NA	-0.485342	0.0883418	-0.307889	-0.735418	0.195484	-0.763714	0.435701	0.873795	-1.06655	-0.38703	-0.606323	-0.50659	-0.866531	-0.561537	0.949772	-0.665666	0.0901458	-0.189248	-1.17116	0.0918262	-1.31066	1.16164	1.47703	-1.9714	0.35704	-1.11631	-0.36256	-0.49427	-0.3163	0.502015	0	0.608539	0	1.10299	0.395902	0.0743811	0.193432
BRCA	TCGA-A8-A08C	TCGA-A8-A08C-01A-11R-A00Z-07	1.03981	0.47624	-0.453682	-1.27695	-0.421916	-1.39594	-0.496858	NA	NA	NA	-0.339613	-0.482958	-0.330031	-0.396764	0.00632738	-0.457223	0.0494032	-0.194642	-0.303072	-1.70395	0.418434	-0.183637	-1.84233	-0.914791	0.97576	-0.496749	-0.660416	-0.311115	-0.572882	-0.158498	-0.877221	0.84927	-0.3785	-0.968964	-1.73518	0.677539	0.149571	-1.45091	-0.714789	0.541051	0	0	0.817983	-0.421916	-0.871384	-0.930672	-1.35434
BRCA	TCGA-A8-A08F	TCGA-A8-A08F-01A-11R-A00Z-07	-0.62749	-0.0164295	1.12458	0.0167229	1.25312	0.158812	-0.116298	NA	NA	NA	0.468111	0.00877328	-0.313474	-0.376835	0.216632	-0.0113392	-0.0753027	-0.153899	-0.195068	-1.02775	-0.627275	-0.111733	-1.11745	-0.0960464	0.335909	0.00671511	0.0652678	-0.19587	-0.522018	0.144385	-0.138693	0.562798	-0.628848	-0.670077	-0.584373	-1.27798	0.279961	-0.353678	0.231959	-0.175087	0	0	1.30012	1.25312	0.540035	0.341915	1.27232
BRCA	TCGA-A8-A08G	TCGA-A8-A08G-01A-11R-A00Z-07	-0.991134	-0.357066	0.480507	-1.44224	0.116965	-0.536213	-0.153634	-0.0641005	0.733589	-0.247939	0.106445	-0.195973	-0.137618	-0.156388	0.316238	-0.0524671	-0.680866	-0.034562	0.960971	0.162227	0.183992	0.651172	0.437833	0.139897	0.505443	-0.335569	-0.217133	-0.0315428	-0.199396	0.256704	-0.139382	-0.239941	-0.0861943	1.05187	1.43031	0.244051	1.43865	1.93161	0.600915	-0.236096	0.187373	0.273635	0.723766	0.116965	0.136308	0.0358316	0.0503004
BRCA	TCGA-A8-A08H	TCGA-A8-A08H-01A-21R-A00Z-07	-0.535284	0.505679	0.498174	1.37171	0.670835	2.75754	1.26799	0.104168	0.066604	0.0974317	1.97679	0.308024	0.0462674	0.114158	0.0591983	-0.112911	-0.933572	-1.25336	0.875469	0.249917	0.580722	-0.0426073	0.0554807	-0.388795	0.214714	1.00023	0.509197	0.231336	0.20804	-0.0459947	-0.176353	-0.584901	-2.0119	1.00556	1.61976	1.26554	0.372089	1.19682	-0.0464065	-0.582124	1.04091	0	0	0.670835	-0.0863418	0.456071	0.870136
BRCA	TCGA-A8-A08J	TCGA-A8-A08J-01A-11R-A00Z-07	-0.593641	-1.83477	0.158327	0.81924	0.200908	-0.119781	0.0137396	0.519482	0.91267	0.426697	0.806724	0.112874	-0.21292	-0.171089	0.171419	-0.262206	-0.419909	0.212692	0.461029	0.326464	-0.133402	0.428049	0.316003	0.650586	0.119909	0.203428	0.21857	-0.100643	-0.172649	0.0642595	-0.451508	0.117499	0.456917	0.351796	1.4477	-0.407394	1.03089	1.43857	1.17922	-0.661292	0.211207	0	3.63893	0.200908	-0.305312	-0.68604	0.242198
BRCA	TCGA-A8-A08L	TCGA-A8-A08L-01A-11R-A00Z-07	-2.13722	-2.27337	1.03015	0.804469	0.508857	-0.430064	-0.400984	1.75183	1.13272	1.02001	-0.0803373	0.0675938	-0.049741	0.100695	0.355996	0.266504	-0.27918	0.18278	0.594685	-0.0975133	0.0586384	0.631672	0.920893	0.618007	0.955272	-0.414573	0.101576	0.0855308	0.248628	0.315426	0.211677	0.387095	0.228685	0.492388	0.831252	0.0963318	1.43525	2.34632	1.19648	0.226959	0.202659	0.399887	0	0.508857	0.836267	0.731896	0.546715
BRCA	TCGA-A8-A08O	TCGA-A8-A08O-01A-21R-A056-07	-0.425598	0.120376	0.351745	-1.19359	0.512963	-0.503542	0.78849	0.26603	0.517927	0.772412	0.637122	-0.20996	-0.184487	-0.0126542	0.113811	-0.0276876	-1.15441	-0.251792	0.30643	-0.851062	0.311844	-0.949881	-1.66289	-1.0475	1.30213	0.00763824	-0.221737	-0.0896018	0.02632	-0.00274745	-0.165924	-0.886443	-0.68547	-0.0153692	-0.113426	0.415887	-0.947639	-1.0342	-0.881292	0.712797	0	0	0	0.512963	-1.18744	-1.00065	-0.52699
BRCA	TCGA-A8-A08P	TCGA-A8-A08P-01A-11R-A00Z-07	-2.32389	-0.503891	0.206598	0.384598	1.35625	-0.0118753	-0.0661798	-0.085058	0.562415	0.212829	0.518809	0.0617866	-0.217851	-0.465032	0.159701	-0.377897	-0.401959	0.331412	-0.0315459	-0.468238	0.0218846	0.191425	-0.544276	-0.109075	1.036	0.00850157	0.116992	-0.132118	-0.667411	0.0602925	-0.529733	0.395716	0.424598	-0.409674	0.0926428	-0.149908	0.724635	0.428126	0.2173	0.368045	2.86573	0.352866	0	1.35625	0.871755	0.910467	1.54964
BRCA	TCGA-A8-A08R	TCGA-A8-A08R-01A-11R-A034-07	-1.78505	1.26159	1.14395	0.0997121	1.57252	1.30847	-0.112708	NA	NA	NA	0.954212	-0.0831433	-0.381259	0.249088	0.369181	0.679615	-0.288963	-0.523639	0.511075	-1.04574	-0.595388	0.0106157	-0.483757	-0.663877	1.91897	0.126185	-0.0270548	-0.278321	0.444902	0.35446	0.88353	0.11362	-0.854036	0.434113	-0.811829	-1.1771	0.418033	0.447135	-0.407541	1.32185	0.478941	0	0	1.57252	0.922657	0.667536	1.31063
BRCA	TCGA-A8-A08S	TCGA-A8-A08S-01A-11R-A034-07	0.0742328	-1.35366	0.914679	0.986338	0.397414	-1.31303	-0.234391	NA	NA	NA	-0.0722178	-0.0256666	0.131241	-0.462988	0.191934	-0.453697	-0.642525	0.0509062	0.366803	-0.2511	0.0105112	-0.251106	-0.92859	-0.22969	0.739538	-0.480355	-0.0171163	0.315112	-0.680812	0.0810372	-0.86544	-0.0317121	0.0353246	0.0504049	0.761352	0.0136191	0.0666232	-0.186202	0.0914994	0.126996	0	0	0	0.397414	-0.684562	-0.6155	-0.277016
BRCA	TCGA-A8-A08T	TCGA-A8-A08T-01A-21R-A00Z-07	0.979293	0.980881	-0.317621	-0.415961	0.0163755	-0.433148	0.487311	0.234654	-0.283063	0.189052	0.109875	0.0231759	-0.219642	-0.108929	0.0565692	0.343326	0.0400787	-0.0654845	0.311847	-0.350424	0.586642	-0.373223	-0.493393	-0.445353	1.28867	-0.322712	0.0643828	-0.131925	-0.0717276	-0.0895606	0.557187	0.920962	-0.141926	0.0836828	0.655256	1.11625	-0.0969678	0.1812	-0.146847	0.6581	0	0	0	0.0163755	-0.543264	-0.563002	-0.696481
BRCA	TCGA-A8-A08X	TCGA-A8-A08X-01A-21R-A00Z-07	1.41951	0.741035	1.01826	0.363791	0.702293	0.790694	0.521629	0.792084	0.77742	1.09338	0.997847	0.053551	-0.400824	0.18388	0.16375	0.220017	-0.306671	-0.244736	0.0640344	-0.447865	-0.63746	0.453059	-0.52083	-0.409966	1.04217	0.304362	0.129085	-0.336687	0.341701	0.0911388	0.263519	0.244791	-0.582813	-0.110632	0.0748583	-1.07872	1.06388	0.1896	-0.130024	0.35184	0	0	0	0.702293	0.669982	0.417712	0.706231
BRCA	TCGA-A8-A08Z	TCGA-A8-A08Z-01A-21R-A00Z-07	0.0813924	-0.00574602	-0.170029	0.772181	1.16659	0.758987	1.21812	0.686198	0.0983676	0.930465	0.981193	0.197885	-0.00666931	0.0235727	0.134896	0.215014	-1.22901	-0.706383	0.623668	-0.793077	-0.0855754	-0.565319	-1.01959	-1.14064	1.19414	0.306367	0.334015	0.168501	0.0473535	0.0352139	0.4533	-1.08973	-1.60812	0.581108	-0.0365447	-0.0981327	-0.438659	-0.315498	-0.979119	0.270144	0	0	0.446754	1.16659	-0.361743	-0.00125102	0.363708
BRCA	TCGA-A8-A090	TCGA-A8-A090-01A-11R-A00Z-07	-1.3253	-0.00495112	0.481839	-0.551304	0.435253	-0.442826	0.202254	NA	NA	NA	0.322875	-0.0907767	0.0145163	-0.428304	0.154179	-0.352476	-0.696303	-0.253717	0.239354	-0.934142	0.229817	-0.27096	-0.869975	-0.700354	1.08616	-0.200972	-0.0472579	0.168926	-0.665284	0.0502314	-0.679939	-0.135118	-0.697775	-0.104184	-0.399385	0.327118	0.0148186	-0.0463053	-0.451649	0.549037	0	0	0	0.435253	0.0355942	-0.0218517	0.477835
BRCA	TCGA-A8-A091	TCGA-A8-A091-01A-11R-A00Z-07	-0.575816	-1.11713	-0.0150937	0.190215	-0.737105	-0.888574	0.439	1.16965	1.13927	0.321211	0.282524	-0.222376	-0.231443	0.0333277	0.0743571	0.261132	-0.673818	-0.169996	0.0577478	-1.33194	-0.112702	-0.958446	-2.01232	-1.2218	0.273664	-0.215425	-0.252106	-0.168015	0.138362	-0.0623816	0.442777	-0.178441	-0.439614	-0.353508	-0.964225	-0.491084	-0.929172	-1.43576	-1.08335	-0.507664	0	0	0.630282	-0.737105	-0.27439	-0.464048	-0.912114
BRCA	TCGA-A8-A092	TCGA-A8-A092-01A-11R-A00Z-07	0.576558	1.01717	1.35768	0.156989	-0.124345	-0.949377	-0.477095	NA	NA	NA	-0.252937	-0.237855	-0.357077	-0.600184	0.33501	-0.190359	0.394743	0.243376	0.331389	-0.557151	-0.116359	-0.137451	-0.822178	-0.124265	1.8204	-0.551454	-0.311657	-0.337779	-0.887229	0.278206	-0.481151	1.36924	0.339452	-0.100514	-0.0900126	-0.299197	0.148021	-0.113472	0.192531	1.61767	0.340327	0.903483	0	-0.124345	-0.416599	-0.621811	0.12879
BRCA	TCGA-A8-A093	TCGA-A8-A093-01A-11R-A00Z-07	-0.600899	-0.495166	-0.204097	-1.4018	0.252506	-0.287401	0.206463	NA	NA	NA	0.0600067	-0.361562	-0.35942	-0.247383	-0.0313688	-0.242848	-1.13687	-0.0274071	-0.341766	-1.42441	-0.198428	-0.635821	-1.21863	-0.482685	0.489242	-0.344097	-0.435682	-0.316446	-0.324846	-0.189913	-0.360589	-0.932427	-0.0798131	-0.881838	-1.13162	-0.523101	-0.473881	-0.54408	-0.140649	-0.177842	0	0	0	0.252506	-1.58692	-1.54913	-0.746284
BRCA	TCGA-A8-A094	TCGA-A8-A094-01A-11R-A00Z-07	-2.69074	-2.69651	1.06433	1.11411	1.489	-0.489292	-0.025171	1.81107	1.63994	0.107568	0.434664	0.180757	-0.440163	-0.500918	0.13682	-0.435052	-0.0173279	0.32534	0.442301	-0.61458	-0.256451	0.528491	-0.283429	-0.0496227	1.32826	-0.0459267	0.30323	-0.372975	-0.700952	0.0452253	-0.713878	0.503722	0.439159	0.276086	0.00738663	-0.576801	1.21503	0.547385	0.315106	0.787962	0	1.58302	2.65908	1.489	1.48119	0.877419	1.65236
BRCA	TCGA-A8-A095	TCGA-A8-A095-01A-11R-A00Z-07	0.907217	-1.00403	0.892594	-0.560743	-0.742502	-0.272068	0.190798	-0.0715604	-0.0243221	1.10519	0.551025	-0.0995916	0.222136	-0.0565887	0.324348	-0.249131	-0.397581	0.121336	0.433691	-0.831453	0.393267	-0.0357477	-0.594467	-0.863243	1.59995	-0.0381137	-0.110631	0.45132	-0.0283917	0.288094	-0.411147	0.264928	0.138218	0.141074	-0.21308	0.899183	0.415502	0.41129	-0.630809	1.30841	1.14869	0	0	-0.742502	-0.0995805	-0.184028	-0.808472
BRCA	TCGA-A8-A096	TCGA-A8-A096-01A-11R-A00Z-07	0.453254	-0.158484	0.585839	-0.280002	1.71911	0.586069	0.717714	NA	NA	NA	0.90143	0.0827598	0.206039	-0.0590658	0.0772949	-0.0941715	-1.48091	-0.102246	0.437383	-1.3101	-0.082989	-0.782224	-0.90636	-1.07001	0.147851	0.264558	0.184686	0.448915	-0.0160918	-0.0320854	-0.179938	-1.38392	-0.435244	0.326449	-1.05887	-0.23894	-0.725512	-0.249859	-0.887977	-0.714927	0	0	0	1.71911	0.522316	0.6183	1.59702
BRCA	TCGA-A8-A097	TCGA-A8-A097-01A-11R-A034-07	-1.33787	-0.800164	0.160444	-0.174178	0.221958	0.331989	0.83062	NA	NA	NA	1.12214	-0.00893927	-0.113712	-0.0489824	0.319528	0.193398	-1.23081	-0.39822	0.918095	-0.629742	-0.2722	-0.414011	-0.82359	-0.673192	1.32416	0.3513	0.0448087	0.0319117	-0.00536934	0.263489	0.379263	-1.05786	-0.919778	0.9088	0.094111	-0.512421	-0.225662	0.24165	-0.413056	0.706337	3.10118	0.143722	6.49587	0.221958	-0.434314	-0.354639	0.168817
BRCA	TCGA-A8-A099	TCGA-A8-A099-01A-11R-A00Z-07	-0.241198	-2.44202	-0.671691	-1.45785	-0.0390948	-1.44601	-0.381201	1.03108	-0.726343	-0.532462	-0.484762	-0.495543	-0.333914	-0.307772	-0.161441	-0.542766	-0.755975	0.514567	-0.715292	-1.21196	0.0658087	0.133192	-2.15514	-0.390675	0.905778	-0.696178	-0.593252	-0.246224	-0.421489	-0.360485	-0.940943	-0.336768	1.02186	-1.34943	-0.864342	0.00402146	0.584366	-1.82427	-0.0994861	0.472244	0.173565	0	0	-0.0390948	-0.917935	-0.648183	-0.447049
BRCA	TCGA-A8-A09A	TCGA-A8-A09A-01A-11R-A00Z-07	-0.663048	-0.697164	-0.0392342	0.417031	0.330142	-0.166464	1.29684	0.386397	0.816982	-0.122197	1.01179	-0.0658767	-0.341578	0.176975	0.132659	0.210308	-1.58538	-0.112188	0.804544	-1.12735	0.0328416	-0.551434	-1.45963	-0.82779	1.30888	0.2464	0.00277894	-0.253321	0.355213	0.0196411	0.312152	-1.51289	-0.360716	0.790022	-0.646675	-0.144378	-0.361151	-0.768702	-0.617119	0.603395	1.46621	0	0	0.330142	0.392513	0.368221	0.0829825
BRCA	TCGA-A8-A09B	TCGA-A8-A09B-01A-11R-A00Z-07	0.563139	-0.0425715	-0.30994	-1.47839	0.0454632	-0.701029	0.371646	1.61357	0.936882	1.37194	0.250706	-0.163216	0.0391914	0.0250706	0.0781625	0.131219	-1.15497	0.115096	0.168548	-0.866515	0.235271	-0.34963	-1.2703	-0.541036	0.127031	-0.259524	-0.171123	0.151787	0.0985366	-0.0528108	0.121905	-0.674965	0.13074	-0.212858	-0.353593	0.325137	-0.0479292	-0.706704	-0.263039	-0.908376	0	0	0.836078	0.0454632	-0.568043	-0.979693	-1.40314
BRCA	TCGA-A8-A09C	TCGA-A8-A09C-01A-11R-A00Z-07	1.00756	0.854301	0.208651	-0.728099	-1.24961	-0.808691	-0.136037	1.28911	-0.191397	0.120758	-0.39623	-0.19054	-0.0911654	-0.267515	0.24073	-0.02069	0.142418	0.0536067	0.19359	-0.576406	0.457816	-0.421419	-0.41647	-0.347173	1.54552	-0.645818	-0.243104	0.012644	-0.356131	0.157414	-0.131865	1.03476	0.0709213	-0.196466	0.41133	0.888132	-0.176233	0.572578	0.00966935	1.20271	0	0	0	-1.24961	-0.92598	-1.05513	-1.65372
BRCA	TCGA-A8-A09D	TCGA-A8-A09D-01A-11R-A00Z-07	0.76997	-0.48641	0.444861	0.888039	-0.0856554	0.948644	0.907119	NA	NA	NA	0.470617	0.105191	-0.154437	0.34056	0.145734	0.197391	-0.515582	-0.767768	0.750267	-0.032335	0.331413	0.23896	-0.833896	-0.0691149	0.505992	-0.0533931	0.215148	-0.094694	0.602986	0.0474276	0.313752	-0.0439251	-1.50398	0.729535	1.13775	0.543519	0.865892	-0.0155419	0.284399	-0.2289	0	0	0	-0.0856554	-0.466193	0.0920627	0.330682
BRCA	TCGA-A8-A09E	TCGA-A8-A09E-01A-11R-A00Z-07	0.385683	-0.240067	-0.196752	-0.946451	-0.165413	-1.22825	-1.4888	2.33899	0.481031	0.63161	-0.116725	-0.274203	0.0368169	-0.481376	0.0766573	-0.909527	0.0699828	0.332713	-0.787576	-0.789212	0.211701	0.17498	-0.625131	0.106099	0.83992	-0.512736	-0.386321	0.202617	-0.668805	-0.0473011	-1.58668	0.814482	0.54105	-1.49839	-0.193739	0.310322	0.656391	0.156002	0.49351	0.354842	0	0.195834	0	-0.165413	-0.870495	-0.893019	-1.05066
BRCA	TCGA-A8-A09G	TCGA-A8-A09G-01A-21R-A00Z-07	0.18261	-2.31934	0.858688	1.12355	0.71413	-1.34439	-0.00516508	1.13002	0.720381	-0.00821991	-0.23527	-0.317281	-0.377967	0.026412	0.236567	-0.205301	-0.325836	0.510668	0.306378	-0.415327	0.198576	1.10935	-0.323529	-0.197549	1.06491	-0.566153	-0.399923	-0.319576	0.0884579	0.164894	-0.45255	0.440406	1.00611	0.0205341	0.167657	0.300896	2.1109	0.47994	0.184802	0.610269	0	0.837984	0	0.71413	0.788768	0.667795	0.260794
BRCA	TCGA-A8-A09I	TCGA-A8-A09I-01A-22R-A034-07	0.196191	-0.973197	1.24358	-0.726342	1.26526	-0.82621	-0.404072	-0.787496	0.420025	0.00917104	0.152181	0.0163586	-0.282181	-0.384673	0.337797	-0.596809	0.0326408	0.373595	0.0755769	-0.953461	-0.415923	0.0330305	-1.04877	-0.034571	1.31464	-0.216424	0.0395315	-0.160093	-0.54406	0.295526	-1.12236	0.831692	0.651298	-0.331116	-0.413349	-0.752918	0.457271	-0.339919	0.319269	0.954343	0.247698	0.20141	0.288624	1.26526	0.747506	0.0861193	0.848344
BRCA	TCGA-A8-A09K	TCGA-A8-A09K-01A-11R-A00Z-07	-0.352814	0.316661	-0.00869743	-0.5377	0.443628	-1.88475	-1.0221	0.0118513	-0.00587936	-0.0593973	-1.24407	-0.623255	-0.51512	-1.03527	0.06626	-1.04235	-0.160099	0.397211	-0.978473	-1.32976	-0.50407	-0.979152	-1.69071	-0.56991	0.817181	-1.25757	-0.862794	-0.558435	-1.5594	-0.0831725	-1.89376	0.632464	0.665998	-1.97042	-1.01423	-1.24663	-1.06302	-1.07235	-0.36207	0.318144	0.449848	0	0	0.443628	0.669296	0.606441	0.214611
BRCA	TCGA-A8-A09M	TCGA-A8-A09M-01A-11R-A00Z-07	-0.425956	-0.0938092	0.119206	-1.15999	0.72318	-0.964065	-0.646038	-0.412975	0.585129	-0.788	-0.565412	-0.349065	-0.211329	-0.442196	0.0896543	-0.669231	-0.122519	0.346772	-0.148721	-1.0414	0.0143178	-0.57499	-0.718811	0.0934111	0.40353	-0.728712	-0.451885	-0.127094	-0.611155	-0.0397587	-1.25297	0.652783	0.45917	-0.659142	-0.363876	-0.0545863	-0.456626	0.477003	0.435413	-0.219092	0	0.611019	0	0.72318	1.26701	0.678241	0.141965
BRCA	TCGA-A8-A09N	TCGA-A8-A09N-01A-11R-A00Z-07	0.606627	-0.862173	1.00733	1.30572	-0.62293	-1.18742	-0.0528057	NA	NA	NA	-0.36038	-0.118599	-0.32715	-0.272044	0.164609	-0.463229	0.161208	0.6483	-0.343406	-0.656326	0.0303392	0.39187	-0.745537	-0.450396	1.17582	-0.619734	-0.138033	-0.212846	-0.405691	0.0706822	-0.874469	0.915626	1.36568	-0.874813	-0.0825182	-0.14014	1.00169	-0.0092152	-0.168372	0.832478	0	0	0	-0.62293	-0.0412804	-0.206869	-0.400613
BRCA	TCGA-A8-A09Q	TCGA-A8-A09Q-01A-11R-A00Z-07	-1.78568	0.990051	0.589172	0.623056	0.774834	-0.458033	0.282061	NA	NA	NA	-0.160029	-0.134258	-0.166388	-0.4442	0.178812	0.103951	0.374031	-0.302563	0.536606	-0.0173253	0.388831	0.882352	-0.970586	-0.073399	1.5452	-0.448776	-0.141151	-0.0700249	-0.644451	0.0775984	0.106297	1.20952	-0.767843	0.197114	0.969889	0.5777	1.74413	-0.221367	0.312992	1.18488	0.20811	0	0.79605	0.774834	0.897602	0.696871	1.01675
BRCA	TCGA-A8-A09T	TCGA-A8-A09T-01A-11R-A00Z-07	0.326185	-1.58658	-0.400284	-1.33041	-0.0835138	-0.213673	0.288116	NA	NA	NA	-0.00733902	-0.188746	0.0281144	-0.740856	0.00719343	-0.473441	-0.582665	0.326553	-0.569753	-1.11169	-0.0352194	-0.545931	-1.22252	-0.282436	1.17258	-0.348227	-0.197737	0.205563	-1.13465	-0.140008	-0.642225	0.0124231	0.479583	-1.21027	-0.836052	-0.198173	-0.407517	-0.689931	0.0181098	0.630068	0.890911	0	0	-0.0835138	-0.769044	-1.35275	-1.99903
BRCA	TCGA-A8-A09V	TCGA-A8-A09V-01A-11R-A034-07	0.2329	-1.08288	0.171354	-1.64512	-0.505022	-0.873909	0.865227	NA	NA	NA	0.0932557	-0.461891	-0.122466	-0.196557	0.1876	0.186692	-1.44311	-0.11215	0.395947	-2.0057	-0.233194	-1.41785	-2.58959	-1.96415	1.13969	-0.299425	-0.55082	-0.0204738	-0.26091	0.100285	0.279187	-1.41278	-0.357546	0.0718427	-2.01534	-0.633797	-1.65052	-2.28335	-2.01538	0.567858	0	0	0	-0.505022	-2.014	-1.76682	-0.598871
BRCA	TCGA-A8-A09W	TCGA-A8-A09W-01A-11R-A00Z-07	1.30177	-0.97121	2.04881	0.800745	-0.884269	-0.724948	0.716641	0.973917	0.536128	0.0340421	0.0644333	-0.0992215	-0.300686	-0.160022	0.203323	-0.916061	0.454258	0.110924	0.211198	-0.6767	0.464767	0.101087	-0.59682	0.166831	1.5821	-0.245355	-0.107504	-0.236298	-0.124422	0.117419	-1.54119	1.23448	0.189897	-0.09774	-0.0393819	0.882076	0.554187	0.154847	0.588662	1.30192	1.14954	0	0	-0.884269	-1.57445	-0.580896	-0.0824452
BRCA	TCGA-A8-A09X	TCGA-A8-A09X-01A-11R-A00Z-07	0.383556	0.240524	1.4531	0.679853	0.880481	0.204794	0.0522492	1.66642	1.99982	0.216723	0.362485	0.041626	-0.538324	-0.0828363	0.154422	-0.704175	1.36967	0.308057	-0.046248	-0.436978	-0.221795	1.52608	-0.199132	0.889195	1.11746	-0.0475593	0.105798	-0.519925	-0.0405935	0.063542	-1.30711	2.08833	0.241894	-0.439205	0.370658	-0.381107	2.66602	0.650537	1.51777	0.709418	0	3.2622	0.547904	0.880481	0.809622	1.1012	1.14294
BRCA	TCGA-A8-A09Z	TCGA-A8-A09Z-01A-11R-A00Z-07	0.461898	0.352141	-0.187935	-0.936511	1.83285	-1.12586	-1.05462	0.151663	-0.10096	-0.0779651	-1.2759	-0.198983	-0.131948	0.0519177	-0.120743	-1.40761	-0.500305	0.844812	-1.11515	-1.10773	-0.305749	-0.291966	-0.796916	-0.326065	0.214658	-1.28277	-0.212776	0.00630163	0.19696	-0.313694	-2.50158	0.135943	1.33458	-1.93518	-0.71388	-0.820145	0.0638206	-0.114719	0.0268698	-0.301023	0	0	0	1.83285	1.25083	0.738466	0.414349
BRCA	TCGA-A8-A0A1	TCGA-A8-A0A1-01A-11R-A00Z-07	-0.113929	-1.29028	0.104753	0.779072	1.97558	0.602623	0.636713	NA	NA	NA	0.696644	0.00995874	-0.0564745	-0.214358	0.0275962	-0.202071	-1.17511	0.0225058	0.282753	-0.502527	0.330819	-0.535939	-0.756588	-1.27619	0.127704	0.126521	0.0463138	0.0354697	-0.29059	-0.102615	-0.326992	-0.801895	-0.326825	-0.0121744	0.127373	0.476463	-0.301195	-0.0628487	-1.15854	-0.811638	0	0	0	1.97558	-0.109089	0.654803	1.9655
BRCA	TCGA-A8-A0A2	TCGA-A8-A0A2-01A-11R-A034-07	-1.052	0.121563	-0.681905	-1.22093	0.0357845	-0.717301	0.650614	NA	NA	NA	0.0495901	-0.27953	-0.158751	-0.348029	0.0722157	-0.218149	-1.04263	0.00109246	-0.026108	-1.93772	-0.0880342	-0.706663	-2.49577	-0.639022	0.963865	-0.342381	-0.336765	-0.040724	-0.459412	-0.0659614	-0.304265	-0.722	-0.0859502	-0.474222	-1.88109	-0.383364	-0.651182	-2.14767	-0.405103	0.359579	0	0	0.408862	0.0357845	0.218587	0.143199	0.236018
BRCA	TCGA-A8-A0A4	TCGA-A8-A0A4-01A-11R-A00Z-07	-0.579994	-0.827946	0.489927	-0.769445	0.322553	0.491088	0.921611	0.258656	-0.219065	-0.10469	0.498065	-0.153692	-0.280258	-0.115905	0.142795	0.40483	-0.874094	-0.426171	0.534554	-0.327362	0.251858	-0.126982	-0.367278	-0.931188	-0.0125638	-0.0945678	-0.156918	-0.168683	-0.121738	0.0369934	0.553444	-0.422099	-0.988013	0.462164	0.810163	0.515392	0.417919	0.960874	-0.724945	-0.838792	0	0	1.32125	0.322553	-1.24227	-0.495251	0.0244919
BRCA	TCGA-A8-A0A6	TCGA-A8-A0A6-01A-12R-A056-07	-0.716213	-1.65542	-1.20592	-0.102554	1.28093	-0.067019	0.292551	NA	NA	NA	0.612401	-0.0984702	-0.0600129	0.12838	0.0620498	0.126967	-1.47252	-0.026521	0.853513	-0.784413	-0.073754	-0.530643	-1.37249	-0.323446	0.897609	-0.00131029	-0.081774	0.0735603	0.246967	-0.0766565	0.159024	-1.06198	-0.196147	0.852223	-0.15534	-0.110071	-0.385968	-0.572837	-0.00683408	-0.012444	0.313695	0.856968	0	1.28093	0.852077	0.943887	1.14351
BRCA	TCGA-A8-A0A7	TCGA-A8-A0A7-01A-11R-A00Z-07	-0.280434	-2.06073	-0.0537031	0.474976	1.70109	0.29356	0.428364	0.790458	1.09662	0.193042	0.872373	0.122298	0.10947	-0.268999	0.132442	0.00438617	-0.960373	-0.0961864	0.967066	0.125726	0.10292	0.299339	0.272104	0.508503	0.747905	0.212451	0.193347	0.307347	-0.409649	0.0219604	-0.055229	-0.340552	-0.30317	1.02281	1.22142	0.241504	0.775852	1.35364	1.00066	-0.00235423	2.18262	5.52478	0	1.70109	1.78644	1.9683	2.01335
BRCA	TCGA-A8-A0A9	TCGA-A8-A0A9-01A-11R-A00Z-07	0.4997	0.289429	0.310024	-1.07106	0.996637	-0.243707	0.0324193	NA	NA	NA	0.0717992	-0.167457	-0.0121406	-0.277898	0.146121	-0.0433224	-0.462026	0.00154631	-0.0218754	-1.31694	-0.419786	-1.01174	-0.900915	-0.671538	0.558469	-0.263217	-0.208381	0.118549	-0.36737	0.0335753	-0.147931	0.304511	-0.0799935	-0.435267	-0.988547	-0.969266	-1.04906	-0.138857	-0.471068	-0.129288	0	0	0	0.996637	-0.634612	-0.0485262	-0.0616412
BRCA	TCGA-A8-A0AB	TCGA-A8-A0AB-01A-11R-A034-07	0.573581	0.355304	0.272812	-0.545894	-2.21912	-1.2664	0.207381	NA	NA	NA	0.0912027	-0.437625	-0.31943	-0.331736	0.194792	0.00471041	-0.208589	0.165828	-0.128866	-1.7307	0.0404813	-0.883991	-1.40447	-1.16423	1.67746	-0.286099	-0.57242	-0.275709	-0.461272	0.105724	-0.195642	0.527793	0.423664	-0.618481	-1.51712	-0.0690737	-0.852598	-0.597146	-1.01717	1.38101	0.16867	0.248599	0.362764	-2.21912	-1.90572	-2.50366	-1.68019
BRCA	TCGA-A8-A0AD	TCGA-A8-A0AD-01A-11R-A056-07	-0.946003	-1.42583	-0.917198	0.0105403	-0.282643	0.394517	0.774488	NA	NA	NA	0.582931	-0.0908655	-0.122551	-0.312939	0.0375307	-0.335433	-1.16798	-0.132502	0.204418	-1.24669	-0.198462	-0.620582	-1.14748	-0.55898	0.90717	0.0327762	-0.0564767	-0.046106	-0.419246	-0.0913611	-0.556287	-0.837158	-0.522501	-0.0716811	-0.880781	-0.5222	-0.4827	-0.297644	-0.245863	0.282965	0.460893	0	0	-0.282643	-0.841103	-1.62673	-0.844032
BRCA	TCGA-AC-A23C	TCGA-AC-A23C-01A-12R-A169-07	-2.20719	-2.39372	-0.387263	0.433154	0.493622	-0.262139	0.642225	2.89265	-0.119251	-0.396881	0.174669	-0.0880206	-0.185273	0.0247866	0.240436	-0.0468038	-0.679174	0.205494	1.12124	-0.682208	0.202749	-0.0476774	-1.26087	-0.721305	0.969695	-0.280032	-0.0743054	-0.0365632	0.0804342	0.166603	-0.0957693	-0.295188	0.258809	1.14103	-0.0424316	0.438015	0.350383	-0.43206	-0.451406	0.225082	0	0.281641	0	0.493622	-0.181418	0.152778	0.490905
BRCA	TCGA-AC-A23E	TCGA-AC-A23E-01A-11R-A157-07	-0.0348691	-0.805487	-0.213036	0.675285	0.115059	1.02223	1.5136	0.228429	-0.474504	-0.274202	1.09871	0.422744	-0.218363	-0.101302	-0.0179565	-0.128408	-1.25766	-0.544697	0.524555	-0.242169	-0.114335	-0.529658	-0.204597	-0.829812	0.746745	0.336941	0.656895	-0.0911634	-0.103846	-0.163281	-0.165734	-1.18523	-1.40981	0.420304	0.789527	-0.18478	-0.359147	0.763688	-0.544334	-0.0412994	0.350853	0.159499	0	0.115059	-1.44626	-1.34409	0.462571
BRCA	TCGA-AC-A23G	TCGA-AC-A23G-01A-11R-A213-07	0.478867	1.03138	-0.806818	0.358713	0.318921	1.92637	1.01833	NA	NA	NA	2.50125	0.339915	0.213413	0.636497	-0.15102	0.977103	-2.36332	-0.670216	0.425758	-0.812196	-0.279421	-1.09912	-0.859794	-0.705699	-1.21504	1.23228	0.532163	0.42818	1.08454	-0.328752	1.63679	-2.28676	-1.42936	0.434266	-0.131968	-0.43136	-1.20502	-0.168475	-0.413682	-2.14212	0.850795	0	0	0.318921	0.309961	-0.18258	0.0729634
BRCA	TCGA-AC-A23H	TCGA-AC-A23H-01A-11R-A157-07	0.666516	-3.26833	0.600877	0.802403	0.660568	-0.57087	-0.0829527	NA	NA	NA	0.680572	0.164841	-0.210033	0.0111846	0.271729	-0.71048	-0.310683	0.571789	0.299535	-1.07019	-0.605249	0.472139	-0.230091	-0.113688	1.59631	0.105966	0.279144	-0.0991112	0.136132	0.212941	-1.21856	0.164756	1.06202	0.0662028	-0.600124	-1.2145	1.08789	0.579278	0.231548	1.15827	0	0	0	0.660568	-1.38694	-1.38576	-0.393486
BRCA	TCGA-AC-A2B8	TCGA-AC-A2B8-01A-11R-A17B-07	0.202226	0.0405603	-0.439205	-0.385904	0.447549	0.462454	1.07148	0.623389	-0.942219	0.0844197	0.799453	0.197684	0.146191	0.110288	0.0531917	0.438519	-1.4408	-0.101116	1.0983	-0.26326	0.821367	-0.206572	-1.13049	-0.985102	0.153216	0.14822	0.31656	0.351831	0.215323	-0.0755173	0.700261	-1.35197	-0.454815	1.17833	0.672185	1.49681	0.161176	-0.450019	-0.798614	-0.896391	0	0	0.645393	0.447549	0.106696	0.325454	0.0377516
BRCA	TCGA-AC-A2BK	TCGA-AC-A2BK-01A-11R-A21T-07	1.03092	0.467146	1.11955	0.526546	-0.478134	1.46206	0.33748	-0.465396	0.269204	-0.200302	-0.205196	-0.295897	-0.431193	-0.0472032	0.265083	-0.302407	1.30592	-0.676479	-0.382789	-1.21684	-0.748029	-0.852857	-0.734138	-1.1306	2.14548	-0.558366	-0.422903	-0.400978	0.0549778	0.199926	-0.852647	1.76061	-1.13894	-0.945618	-0.810535	-1.0961	-0.86158	-0.0304828	-0.971738	1.67081	0.605825	0	0	-0.478134	-0.421267	-0.520276	-0.395154
BRCA	TCGA-AC-A2BM	TCGA-AC-A2BM-01A-11R-A21T-07	-1.0461	-0.493039	0.0321755	-0.175807	0.0695738	-1.32765	-0.503394	-0.0515823	-1.00513	-0.110303	-0.385725	-0.466555	-0.00620596	-0.697366	0.211687	-0.17115	-0.121969	-0.604047	-0.0686738	-1.09891	-0.112677	-0.743799	-1.80357	-0.29637	1.07824	-0.625065	-0.635837	0.121865	-1.03207	0.11449	-0.340024	0.648089	-1.26695	-0.677064	-0.549299	-0.416506	-0.760035	-1.1127	-0.0080188	0.612517	0.824861	0	0	0.0695738	0.438915	0.43362	-0.319636
BRCA	TCGA-AC-A2FB	TCGA-AC-A2FB-01A-11R-A17B-07	-0.362728	0.612948	-0.450575	0.510328	1.61869	0.0351829	0.7508	0.00355972	0.497324	1.17685	0.568151	0.0855035	-0.00983956	0.0692049	0.0530566	0.808107	-1.415	0.380674	0.987421	-0.518515	0.235588	-0.270582	-1.17123	-0.776016	0.164804	-0.0317839	0.145765	0.145689	0.188151	-0.0856629	1.27968	-1.01562	0.527916	1.00275	0.332525	0.439291	0.0592391	-0.40628	-0.517314	-0.950483	0	0.298863	0	1.61869	1.15832	1.48266	1.22597
BRCA	TCGA-AC-A2FE	TCGA-AC-A2FE-01A-11R-A19W-07	0.569406	0.023142	-0.721573	-0.225643	0.667674	0.662	0.604768	0.292882	-0.554035	0.210737	0.884254	0.14479	0.212299	0.108021	-0.0301698	0.618609	-1.76183	-0.220622	0.53877	-0.739642	0.360173	-0.744915	-0.943371	-0.615807	-1.08717	0.212914	0.246769	0.418153	0.234124	-0.176444	0.994089	-1.29381	-0.732225	0.450363	-0.0944857	0.678028	-0.610809	0.0423028	-0.333508	-2.32547	0	0	0	0.667674	1.08476	1.43681	0.248219
BRCA	TCGA-AC-A2FF	TCGA-AC-A2FF-01A-11R-A17B-07	0.858052	-0.156251	-0.177076	-0.120913	0.524313	1.15709	1.53351	0.796027	-0.927531	0.555514	1.38165	0.0732901	0.0677337	0.402726	0.0878645	0.848507	-1.56452	-0.746303	1.20213	-0.555904	0.62158	-0.425253	-1.05792	-0.786066	0.324551	0.544648	0.151683	0.267298	0.68831	-0.0251129	1.47688	-1.28971	-1.65775	1.35118	0.471371	1.31948	-0.111938	-0.114337	-0.503691	-0.6735	0.205334	0	0	0.524313	0.661651	0.924618	1.29394
BRCA	TCGA-AC-A2FG	TCGA-AC-A2FG-01A-11R-A17B-07	0.325716	0.0703991	-1.7358	-0.551157	-0.109429	-0.00938713	0.203254	0.0223079	-0.824134	-0.119684	0.605236	-0.0451958	-0.118572	0.0795104	-0.0232618	0.433267	-1.19587	0.345407	0.780619	-0.394634	1.10632	-0.144346	-1.22683	-0.528601	0.265688	-0.0232066	-0.00560682	0.0145176	0.177514	-0.185268	0.641379	-0.733829	0.667994	0.686599	0.784192	2.23784	0.266033	-0.510398	-0.253242	-0.744078	0.760805	0	0.660465	-0.109429	-0.776815	-0.0292891	0.124334
BRCA	TCGA-AC-A2FK	TCGA-AC-A2FK-01A-12R-A180-07	0.222166	0.607432	-2.05148	0.444654	0.644292	0.179518	0.191452	NA	NA	NA	0.374871	-0.0761716	-0.0192681	0.452681	-0.129229	1.00198	-1.30024	0.0727088	0.957077	-0.938352	0.587851	-1.01717	-1.62658	-1.73611	-0.116034	-0.205088	-0.0573118	0.125195	0.768637	-0.342603	1.48478	-0.816068	0.0542681	0.995819	-0.090965	1.23092	-0.998722	-0.927448	-1.71386	-1.0772	0.270497	0	0	0.644292	-0.523465	0.364281	-0.0641202
BRCA	TCGA-AC-A2FM	TCGA-AC-A2FM-01A-11R-A19W-07	0.485404	0.734047	-0.188749	0.17146	-1.65354	-1.10815	-0.202956	0.65451	0.346747	-0.726248	0.0147515	-0.188039	-0.10695	0.319865	0.0895092	-0.501414	-0.969677	0.0937613	-0.404664	-1.27865	-0.215251	-0.196841	-1.87516	-0.302748	0.257374	-0.448887	-0.217174	-0.0593456	0.619036	-0.0481346	-1.02127	-0.467594	0.0689507	-1.06597	-0.966729	-0.622295	0.156539	-1.43025	-0.0196754	-0.362192	0.211979	0	0	-1.65354	-0.692587	-0.692694	-1.57645
BRCA	TCGA-AC-A2FO	TCGA-AC-A2FO-01A-11R-A180-07	-0.338211	0.60419	-1.42727	0.630703	0.620792	0.372118	0.74921	NA	NA	NA	0.827054	0.0653955	0.0273477	0.121894	0.00415696	0.600277	-1.83857	0.0269582	0.732164	-0.253539	0.823721	-0.108517	-1.24073	-0.717619	-0.178691	0.142119	0.133352	0.167115	0.271436	-0.156221	1.00999	-1.67853	-0.184357	0.661909	0.706138	1.37915	0.302199	-0.4394	-0.437183	-1.42599	0.241052	0	0.518437	0.620792	0.814049	1.25223	0.709553
BRCA	TCGA-AC-A2QH	TCGA-AC-A2QH-01A-11R-A18M-07	1.94025	0.404305	0.885112	0.556461	-1.1822	1.54378	0.841315	NA	NA	NA	2.18066	0.147265	-0.276381	0.165969	0.0960208	0.729024	0.450133	-2.10744	-0.213987	-0.566107	-0.549525	-1.0557	-0.86966	-0.924503	0.978024	1.18844	0.272023	-0.217021	0.339176	-0.00696127	0.955482	0.698902	-2.70042	-0.496061	0.174583	-0.876532	-1.16942	-0.2143	-0.790037	0.421488	0	1.42799	0	-1.1822	-1.05279	-1.79756	-0.631294
BRCA	TCGA-AC-A2QI	TCGA-AC-A2QI-01A-12R-A19W-07	-0.563784	-0.625965	-2.10966	-0.714408	-0.434205	0.609528	0.363866	0.955384	-1.18774	-1.21936	1.16924	-0.0781879	-0.0366452	0.504919	-0.174731	0.336635	-1.97589	-0.0526787	0.0549555	-1.3128	-0.18607	-0.749135	-1.13667	-0.741166	-1.08512	0.389104	-0.0136156	0.0850032	0.899247	-0.382574	0.55816	-1.9086	-0.288268	-0.258301	-0.904261	-0.508449	-0.617989	-0.433913	-0.471195	-2.38195	0.929968	0	1.05876	-0.434205	0.470261	0.372467	0.387765
BRCA	TCGA-AC-A2QJ	TCGA-AC-A2QJ-01A-12R-A19W-07	-2.25237	1.53338	-0.315872	-1.93123	-3.21033	2.75926	-1.39196	1.30107	1.67719	1.27088	3.12728	0.28449	-0.345154	0.302031	-0.513777	-0.532918	-0.526605	-0.498732	-1.60768	-0.623331	-0.695073	-0.330424	-0.00996745	2.35384	-2.0509	1.77495	0.482478	-0.250941	0.567563	-0.784256	-0.940114	-0.367786	-1.17919	-2.21549	-0.18851	-1.26426	-0.0594581	0.621185	3.25199	-2.06567	0.888784	2.27676	0	-3.21033	0.684823	-0.164488	-0.196407
BRCA	TCGA-AC-A3BB	TCGA-AC-A3BB-01A-21R-A19W-07	0.211483	0.797461	-1.71698	-0.681895	-0.23355	1.2686	0.188202	NA	NA	NA	1.54457	0.166434	-0.00600801	0.277851	-0.128978	0.531452	-1.42768	0.16282	0.394468	-0.198448	0.667677	-0.234139	0.125788	-0.233103	-1.84001	0.648267	0.286082	0.109385	0.538278	-0.316098	0.921659	-1.1617	-0.00834874	0.244041	0.772031	1.33072	0.147246	1.28756	0.175682	-2.8154	0	0	0	-0.23355	1.45431	1.40149	0.339991
BRCA	TCGA-AC-A3EH	TCGA-AC-A3EH-01A-22R-A22K-07	-0.0655479	-0.480406	-0.867511	0.302968	-0.45522	-0.149471	-0.716068	NA	NA	NA	1.01476	0.0881998	-0.240703	-0.0175979	-0.120459	-0.0567548	-0.927781	0.632884	-0.669904	-0.877113	-0.256881	-0.138898	-0.614733	-0.134841	-0.534331	0.318271	0.146118	-0.164194	0.101708	-0.301912	-0.144898	-0.498681	1.13777	-1.20829	-0.367096	-0.502893	0.215299	-0.0996516	0.240573	-1.44576	0	0.177454	0.830943	-0.45522	0.216925	-0.46418	-0.565884
BRCA	TCGA-AC-A3HN	TCGA-AC-A3HN-01A-11R-A213-07	-0.105513	-0.51914	-0.275039	-0.469051	0.635878	0.796131	1.06931	0.383105	0.91651	1.49357	1.80818	0.113786	-0.017671	0.490442	0.03037	0.666651	-2.20026	-0.402187	0.76	-0.478313	0.481807	-0.578614	-1.10809	-0.575219	-0.641186	0.815041	0.22979	0.106375	0.869104	-0.0994071	1.09786	-2.26668	-1.098	0.801536	0.452195	0.82801	-0.359299	-0.424337	-0.285822	-1.89362	0.428192	0	0	0.635878	0.712911	0.536661	0.549939
BRCA	TCGA-AC-A3OD	TCGA-AC-A3OD-01A-11R-A21T-07	-1.63742	0.294057	-0.00538065	-0.299393	0.722535	-0.0931061	0.314797	NA	NA	NA	0.368423	-0.0243073	-0.10997	0.170352	0.15047	0.534771	-1.23841	-0.0511302	1.05883	-0.782786	0.194685	-0.891656	-1.21958	-0.687741	-0.0594942	-0.155667	0.0146525	-0.0273006	0.357344	0.0509519	0.832367	-0.736879	-0.321368	1.14436	-0.160869	0.356649	-0.753024	-0.401588	-0.446307	-1.17376	0	0	0.288361	0.722535	0.997905	1.10356	0.553218
BRCA	TCGA-AC-A3QP	TCGA-AC-A3QP-01A-11R-A22U-07	0.149761	1.09806	-2.35439	-0.924479	-1.54231	0.255165	-0.195882	0.36232	0.560995	0.83065	1.52722	0.0797568	0.0177491	0.0786001	-0.247487	0.0812608	-0.343392	0.371013	-0.169708	-0.853972	0.496522	-0.165464	-0.533794	0.991091	-1.30166	0.654966	0.161445	0.154023	0.222578	-0.476748	0.0963893	0.0440125	0.466356	-0.480903	-0.312937	0.958531	0.225315	0.399602	1.6603	-1.94186	0.682159	0	0	-1.54231	0.438303	0.0710275	-0.68987
BRCA	TCGA-AC-A3QQ	TCGA-AC-A3QQ-01A-11R-A22K-07	-0.417539	0.0293391	-0.449375	-1.17986	-1.14918	0.0822428	-1.15096	NA	NA	NA	0.712075	0.075437	-0.136201	-0.147443	-0.208613	-0.575038	-0.548246	0.715644	-1.33297	-0.82385	-0.170502	-0.846787	-0.892688	1.17517	-1.5954	0.109132	0.115329	-0.0774673	-0.104334	-0.413604	-1.05745	-0.141801	1.12702	-2.10711	-0.135522	-0.383514	-0.72854	-0.214663	1.83803	-1.95489	0.297583	0.413726	0	-1.14918	0.66544	0.0768057	-0.864676
BRCA	TCGA-AC-A3TM	TCGA-AC-A3TM-01A-11R-A22K-07	0.947485	0.395341	0.167259	-2.74449	-0.760247	0.153262	-1.43247	1.80354	-0.689005	0.170061	1.17164	-0.00261659	0.14161	-0.043611	-0.0947477	-0.217015	-0.247467	0.72004	-0.87652	-0.570741	0.0758545	-0.320732	-0.19595	1.67713	-1.62958	0.387497	-0.00182156	0.291357	0.0251746	-0.258231	-0.497503	0.097798	1.03927	-1.51122	0.125713	0.0438709	0.0144043	0.566577	2.42342	-2.0206	0.632067	0	1.3594	-0.760247	0.836246	0.625126	-1.37412
BRCA	TCGA-AC-A3TN	TCGA-AC-A3TN-01A-11R-A22K-07	-0.902165	-1.00891	-1.97781	-3.03462	-2.09057	-0.288607	-1.24959	0.143458	-0.812297	0.585958	0.905542	-0.243818	-0.2665	-0.0322283	-0.300844	-0.817816	-0.913907	0.6867	-1.21412	-1.12885	0.352778	-0.450595	-0.556779	0.811492	-1.25694	0.223923	-0.303654	-0.208991	0.0895758	-0.552197	-1.41629	-0.491041	1.17279	-1.95985	-0.847421	0.412262	-0.193121	0.193198	1.37624	-1.88303	0	0	0.503668	-2.09057	-0.0823118	-0.156335	-1.17201
BRCA	TCGA-AC-A3W5	TCGA-AC-A3W5-01A-11R-A22K-07	-1.46072	-1.58631	0.126255	0.362072	0.328753	1.02089	0.718798	0.241783	0.403812	1.08792	1.39644	0.255772	-0.199307	0.448209	0.0497489	0.777782	-2.03143	-0.115417	0.441221	-0.349123	-0.192226	-0.362492	-0.736817	-0.138137	-1.31997	0.609926	0.420895	-0.133412	0.79227	-0.0430976	1.22317	-1.66387	-0.424387	0.508115	0.307692	-0.349504	-0.0739378	-0.0480605	0.249023	-2.06746	0.591128	0.581709	0	0.328753	1.25805	1.02281	0.567601
BRCA	TCGA-AC-A3W6	TCGA-AC-A3W6-01A-12R-A22K-07	0.00229102	-0.551639	-0.538205	-0.716091	-0.160627	1.33935	0.670055	1.22255	0.643209	0.553485	1.69214	0.0722443	0.00908812	0.717612	-0.0160438	0.694344	-2.26106	-0.4323	0.0915736	-0.648875	-0.0368231	-0.992809	-0.975626	-0.569798	-1.85428	0.787186	0.169361	0.142295	1.21546	-0.141093	1.22616	-2.09793	-1.10068	-0.0699692	-0.0793628	-0.142945	-0.98584	-0.336196	-0.256136	-2.68776	0.44729	0	0	-0.160627	1.0555	1.19785	0.553323
BRCA	TCGA-AC-A3W7	TCGA-AC-A3W7-01A-11R-A22K-07	-0.23713	-0.677193	-0.284271	-0.622931	-0.0891749	0.0512009	0.210923	0.227509	-0.487404	0.460484	1.24286	-0.0222339	0.0546628	0.504536	-0.0135143	0.456826	-2.06431	0.519691	0.218788	-0.998439	0.0515288	-0.698205	-1.08579	-0.828377	-1.16106	0.404635	0.0255933	0.210806	0.872797	-0.148789	0.772384	-1.97655	0.986937	0.0134911	-0.454834	-0.097731	-0.554304	-0.54502	-0.572198	-2.24058	0.579382	0	0	-0.0891749	-0.0936861	-0.137685	-1.00127
BRCA	TCGA-AC-A3YI	TCGA-AC-A3YI-01A-21R-A239-07	0.209068	1.3214	-1.85781	1.11413	1.47609	1.02125	0.412901	NA	NA	NA	2.12186	0.388663	0.0725197	0.52891	-0.0936921	0.793923	-1.13415	-0.537434	0.550616	-1.05669	-0.151896	-1.11089	-1.09199	-0.698579	-0.713596	0.984963	0.602374	0.308609	0.912783	-0.269321	1.3083	-0.79294	-1.1094	0.551139	-0.487199	-0.322669	-1.21396	-0.284645	-0.445265	-1.62478	0	0	1.09201	1.47609	0.30896	-0.0315785	-0.030949
BRCA	TCGA-AC-A3YJ	TCGA-AC-A3YJ-01A-11R-A22U-07	0.122783	0.307504	-1.38105	-1.88137	-1.18364	-1.06664	-2.10428	0.692235	-0.467326	-0.798299	-0.175576	-0.177547	-0.156337	-0.46709	-0.280616	-1.03978	0.34924	0.281568	-0.834065	-0.532557	0.101052	0.345461	-0.176054	1.23545	-1.22095	-0.439373	-0.221781	-0.100067	-0.644916	-0.529834	-1.81776	0.985288	0.338303	-1.55925	0.143902	0.0263175	0.936936	0.631393	1.87798	-1.64214	0	0	0.620163	-1.18364	-0.467739	-0.687831	-1.75429
BRCA	TCGA-AC-A4ZE	TCGA-AC-A4ZE-01A-11R-A41B-07	-1.79443	0.959683	-0.248935	-1.54082	-0.403234	-0.665427	0.0527147	0.469718	-1.60818	-0.511988	-0.883887	-0.160829	-0.29684	0.0888655	0.0982733	-0.480256	-0.341796	0.0298226	-0.168311	-0.352646	0.566059	-0.354737	-1.36472	-0.763956	0.0560677	-0.978687	-0.171605	-0.306894	0.261735	-0.0260271	-1.05325	0.253169	-0.0324843	-0.637599	0.647995	0.986806	-0.014652	-0.664081	-0.564448	-0.620026	0.21319	0	0	-0.403234	0.759047	-0.0655562	-1.36178
BRCA	TCGA-AC-A5EH	TCGA-AC-A5EH-01A-11R-A28M-07	0.231033	-0.55604	-0.357177	-0.067052	-0.103133	0.863253	0.254059	NA	NA	NA	1.36593	0.305399	-0.250217	0.0628994	0.034078	0.30826	-0.324768	-0.105788	0.212313	0.426801	0.394787	0.983849	0.862719	0.518578	-0.345005	0.581859	0.479246	-0.191927	0.207068	-0.0710602	0.544679	0.13472	-0.30061	0.026154	1.73685	0.613627	1.8721	2.1051	1.08409	-1.06982	4.75845	4.75709	0.546113	-0.103133	0.283283	-0.217042	0.540998
BRCA	TCGA-AC-A5EI	NA	NA	NA	NA	NA	NA	NA	NA	1.3214	0.298719	0.616445	NA	NA	NA	NA	NA	NA	NA	NA	NA	NA	NA	NA	NA	NA	NA	NA	NA	NA	NA	NA	NA	NA	NA	NA	NA	NA	NA	NA	NA	NA	NA	NA	NA	NA	NA	NA	NA
BRCA	TCGA-AC-A5XS	TCGA-AC-A5XS-01A-11R-A29R-07	0.698081	0.19786	-0.810306	0.397834	-1.37494	0.529951	-0.670235	0.594777	-1.40333	-0.11122	0.791856	0.0688507	0.202461	-0.0262555	-0.00506755	-0.384903	-0.805288	0.297414	0.0390175	-0.158685	0.527155	-0.265159	-0.762979	0.649923	-0.688227	0.157167	0.144076	0.379463	0.0685058	-0.150701	-0.739354	-0.277083	0.392339	-0.332907	0.619344	1.13224	0.0460395	-0.0609971	1.22174	-1.36792	0.280558	0.22813	0	-1.37494	0.790667	1.02923	0.273743
BRCA	TCGA-AC-A5XU	TCGA-AC-A5XU-01A-11R-A28M-07	1.5264	1.24484	-0.194008	-0.206899	-0.734124	0.230158	-0.341648	-0.577847	-0.320107	0.076832	1.17209	-0.0607755	-0.294941	0.3109	0.104561	-0.118798	-0.312025	-0.293861	-0.290701	-1.24613	-0.834101	-0.628095	-1.23414	-0.187037	-0.33001	0.357798	0.0187452	-0.240632	0.615532	-0.00650423	-0.293906	0.132677	-0.704325	-0.711177	-1.05834	-1.65057	-0.486195	-0.350216	0.218653	-1.09853	0	0	0	-0.734124	-0.0548216	-0.479425	-0.670999
BRCA	TCGA-AC-A62V	TCGA-AC-A62V-01A-11R-A31O-07	-0.720263	-0.78628	-0.197813	-1.29272	-2.56836	0.572143	-1.31447	NA	NA	NA	0.615668	-0.136123	-0.458106	-0.201117	-0.0845945	-1.11095	0.124988	0.25421	-1.45201	-0.221809	0.219158	0.0670785	-0.838382	1.76758	-0.732151	0.136684	-0.14821	-0.444844	-0.161679	-0.241022	-1.53458	0.504598	0.288153	-2.2479	0.526645	0.0876095	0.538163	-0.157287	2.53574	-1.11049	0.720575	0	0	-2.56836	-1.18822	-1.36241	-1.29939
BRCA	TCGA-AC-A62X	TCGA-AC-A62X-01A-11R-A29R-07	0.804028	0.574328	-0.401469	-0.167709	1.50711	-0.78815	-2.2846	0.178596	0.252557	0.279403	-0.0974334	0.00146732	-0.547354	0.00163226	0.10614	0.0101961	0.428422	0.197041	-0.771225	-1.24984	-0.804685	-0.823903	-0.50494	0.246488	1.12969	-0.467035	0.0160767	-0.542902	0.0396237	-0.0178639	-0.504729	0.9166	0.289945	-1.30059	-0.920502	-1.33155	-0.729765	0.328251	0.707776	0.742259	0	0	0	1.50711	-0.728967	-1.4504	1.98502
BRCA	TCGA-AC-A62Y	TCGA-AC-A62Y-01A-11R-A29R-07	-0.947706	0.410797	-1.60291	-0.324162	-1.39642	0.0957191	-0.445976	NA	NA	NA	0.627043	0.149816	0.289275	-0.0757983	-6.57417e-05	-0.308266	-1.18605	0.370886	0.2832	-0.788367	0.22741	-0.0651407	-0.0685185	0.290405	-0.140512	0.160778	0.230436	0.456287	0.0053373	-0.149766	-0.483116	-0.675906	0.611693	0.0149673	-0.402136	0.295453	0.368324	1.00452	0.778181	-0.835271	0	0	0	-1.39642	-0.10449	-0.102375	-0.495166
BRCA	TCGA-AC-A6IV	TCGA-AC-A6IV-01A-12R-A33J-07	0.257502	0.409527	-0.108442	-0.207345	0.260587	1.31885	1.033	NA	NA	NA	1.58099	0.0552931	0.0371468	0.325913	0.0967351	0.795018	-2.09837	-1.10496	1.34253	0.0863918	0.869253	-0.4979	-0.350167	-0.634887	-1.34053	0.674654	0.172498	0.182191	0.579	0.0135576	1.34761	-1.65543	-2.11023	1.7213	1.80219	1.99358	-0.247006	0.696485	-0.393964	-2.40264	2.10288	0.182851	0.483643	0.260587	1.07464	1.26591	0.598826
BRCA	TCGA-AC-A6IW	TCGA-AC-A6IW-01A-12R-A33J-07	1.95296	2.45986	0.514036	-0.576812	0.966674	-0.263446	-2.01773	-0.264725	-0.475943	-0.391645	0.359255	-0.139225	-0.30352	0.166149	0.236861	0.183211	2.18723	-0.00693341	-0.165369	0.17629	-0.194972	0.532751	0.630143	0.698834	0.756929	-0.176407	-0.211459	-0.257483	0.296667	0.167008	0.0391233	2.49461	-0.121205	-0.558042	1.09405	-0.328794	1.18707	1.90496	1.22041	0.267576	0	0	2.01128	0.966674	1.77889	1.19968	0.682217
BRCA	TCGA-AC-A6IX	TCGA-AC-A6IX-01A-12R-A32P-07	-0.502356	-0.953555	-0.246649	-0.931582	0.142056	0.419058	0.874258	1.14127	0.777672	-0.320507	1.15676	0.107979	0.172717	0.411025	0.0525675	0.385422	-1.55299	-0.0406284	0.942135	-0.236458	0.914761	0.0609518	-0.75097	-0.53946	-0.40874	0.41251	0.221242	0.359689	0.744894	-0.0767496	0.626101	-1.4002	-0.376815	1.04467	0.734063	1.7155	0.605823	0.144342	-0.247076	-1.73318	0.228602	0	0	0.142056	0.026105	0.314897	-0.00591209
BRCA	TCGA-AC-A6NO	TCGA-AC-A6NO-01A-12R-A33J-07	0.835095	-0.0849919	-0.315014	0.396372	-0.0139697	-0.861113	-0.494865	0.725491	-0.883787	-0.473703	0.446684	-0.214249	0.0483087	0.0781958	0.129414	-0.0127714	0.0259088	0.437754	-0.0168123	-1.08704	0.341106	-0.0659433	-1.02516	-0.271497	0.0985428	-0.159975	-0.276032	0.202691	0.174663	0.0214415	-0.125845	0.831315	0.924271	-0.458828	-0.344463	0.760946	0.288161	-0.197214	0.0370566	-0.669625	0.245015	0	0	-0.0139697	-1.01784	-0.437925	-1.39863
BRCA	TCGA-AC-A7VB	TCGA-AC-A7VB-01A-11R-A352-07	0.442668	0.348568	0.497942	-1.14852	-0.0480965	-2.14806	-0.951618	NA	NA	NA	-0.826852	-0.465997	-0.371781	0.121719	0.186833	-0.867771	0.135717	0.170191	-0.780187	-1.18068	0.26698	-0.56241	-0.390025	-0.0360405	1.05608	-1.01964	-0.610866	-0.382592	0.249108	0.0907792	-1.51755	0.837599	0.288239	-1.51305	-0.646999	0.465095	-0.396531	0.714448	0.332333	0.710374	0.463443	0	0	-0.0480965	-0.360129	-1.3391	-1.91263
BRCA	TCGA-AC-A7VC	TCGA-AC-A7VC-01A-11R-A352-07	1.11312	1.42521	0.402134	0.337094	-1.42785	3.61309	1.15617	NA	NA	NA	3.363	0.421069	-0.042629	0.878922	0.0550986	0.352401	0.146378	-1.83331	-0.433035	-0.178883	-0.689927	0.126883	0.0392572	1.06285	-0.336598	1.97152	0.676387	0.110469	1.48164	-0.0523513	0.371337	0.383504	-2.47445	-0.723669	0.741627	-1.04856	0.575854	0.991928	1.70163	-0.625328	5.93999	3.25859	0	-1.42785	-0.646184	-1.64174	-1.33258
BRCA	TCGA-AC-A8OP	TCGA-AC-A8OP-01A-11R-A36F-07	-0.761834	0.94242	-0.312477	-0.264575	-0.456436	-0.350423	0.716496	NA	NA	NA	0.624897	-0.11008	-0.139323	0.292466	0.0966907	0.30066	-1.00024	-0.140047	0.513192	-0.910655	0.630695	-0.679597	-1.31742	-0.94071	0.271325	-0.0330299	-0.118184	-0.0950001	0.572305	-0.0306563	0.437927	-0.410196	-0.227747	0.328648	-0.00316749	1.1142	-0.575156	-0.506494	-0.774659	-0.633735	0	0	0	-0.456436	-0.247584	0.0567499	-0.641427
BRCA	TCGA-AC-A8OQ	TCGA-AC-A8OQ-01A-11R-A41B-07	-1.32716	0.374106	0.62988	0.114751	0.571667	1.02467	0.0866932	0.464729	1.38564	0.966251	1.40592	0.116347	-0.298251	0.407925	0.2719	1.2395	0.00972086	-0.495776	0.562529	0.349591	0.325933	0.490809	-0.529291	-0.562519	0.239084	0.480725	0.242913	-0.28797	0.666648	0.227114	2.12009	0.505764	-0.904821	0.652644	1.52244	0.737644	1.20134	0.427761	-0.21682	-0.455316	5.52629	4.85857	1.50362	0.571667	1.50823	0.95369	0.465521
BRCA	TCGA-AC-A8OR	TCGA-AC-A8OR-01A-21R-A41B-07	0.616091	1.46134	-1.23737	-0.779047	-1.01636	1.05523	-2.67477	NA	NA	NA	-0.782137	0.0199075	-0.026665	-0.411983	-0.21612	-0.704086	0.240751	0.716826	-1.12428	-0.670474	-0.403886	-1.004	-0.219596	-0.485844	-0.852268	-0.94651	0.0641257	0.0552473	-0.516109	-0.448961	-1.37834	0.986595	1.11148	-1.99656	-0.0386735	-0.914089	-1.005	0.709377	-0.229415	-1.30449	0	0	2.81815	-1.01636	-1.07983	-1.4908	-1.31043
BRCA	TCGA-AC-A8OS	TCGA-AC-A8OS-01A-12R-A41B-07	-0.904777	-0.744054	-0.838247	-0.66894	0.566998	0.495777	0.933195	NA	NA	NA	1.19422	-0.0152775	-0.0768769	0.481678	-0.0558987	0.566535	-1.6299	-0.0494418	0.718124	-0.370773	0.583007	-0.398287	-0.820007	-0.811943	-1.20838	0.413038	0.0558264	0.0198041	0.830527	-0.209295	1.0631	-1.32645	-0.3536	0.683104	0.457563	1.07493	-0.0937113	0.0108414	-0.530722	-2.19881	0	0	0	0.566998	0.601345	0.557004	0.0826366
BRCA	TCGA-AN-A03X	TCGA-AN-A03X-01A-21R-A00Z-07	-0.57197	0.651004	-0.578034	-0.499921	-1.86645	1.01801	0.968188	NA	NA	NA	0.944415	0.0164903	0.0565586	-0.310411	-0.371216	-0.455001	-1.39999	-0.308652	-0.937864	-1.02827	-0.444837	-0.807424	-1.30602	0.314706	0.057644	0.299655	0.090307	0.218059	-0.428593	-0.618618	-0.786917	-1.31134	-1.00128	-1.59424	-0.591346	-0.991124	-0.784227	-0.861444	0.77128	-0.682899	0	0	4.21795	-1.86645	-0.423259	-3.52744	-1.01026
BRCA	TCGA-AN-A03Y	TCGA-AN-A03Y-01A-21R-A00Z-07	1.04764	1.54247	0.0896275	-0.520483	-1.03377	-0.964812	-0.996111	NA	NA	NA	0.0881594	-0.29171	-0.0266254	-0.650849	0.209504	-0.286822	0.868797	-0.196202	-0.398487	-1.10765	-0.0351314	-0.105155	-1.31395	0.550061	1.07909	-0.266987	-0.393582	0.0864312	-0.980958	0.106693	-0.607841	1.6923	-0.476384	-1.06112	-0.935878	-0.277512	0.249909	-0.786107	1.02681	0.75818	0	1.47166	0	-1.03377	0.296837	0.564643	-0.455325
BRCA	TCGA-AN-A041	TCGA-AN-A041-01A-11R-A034-07	0.283276	-0.234596	0.185739	-0.932439	-0.0376995	0.165824	0.834613	-0.19088	-1.03309	0.503241	1.06961	-0.112824	-0.243653	0.386784	0.121127	-0.15044	-1.1735	-0.26546	0.252027	-1.5849	-0.743703	-0.903603	-1.51683	-0.982436	0.905025	0.31861	-0.0499153	-0.165398	0.706865	0.0130327	-0.243113	-1.00027	-0.677145	0.0104103	-1.48856	-1.51744	-0.970864	-0.951016	-0.788178	0.167033	0.374474	0	0.453417	-0.0376995	-1.25402	-0.784357	-0.432924
BRCA	TCGA-AN-A046	TCGA-AN-A046-01A-21R-A034-07	-0.182726	0.621983	-0.0727861	0.566729	1.2702	-0.0900078	0.0858543	NA	NA	NA	0.769603	0.0338648	-0.176263	-0.148706	0.0676897	-0.0849954	0.0079718	0.175744	0.0546133	-0.875457	0.0235543	0.0139739	-0.995062	0.227493	0.0954888	0.140084	0.0807106	-0.0495308	-0.164358	-0.0666966	-0.168143	0.762304	0.165157	-0.356161	-0.293811	-0.0516506	0.45028	-0.346725	0.672497	-0.682131	0.236108	0	0	1.2702	0.795011	1.04243	0.713259
BRCA	TCGA-AN-A049	TCGA-AN-A049-01A-21R-A00Z-07	0.415616	0.117297	0.570747	-0.620266	-0.492853	-0.191586	0.107755	-0.482623	-1.72343	-0.671538	0.647895	-0.0252035	0.0517968	-0.183061	0.182151	-0.14252	-0.738937	0.251524	0.65618	-0.658683	0.0638398	-0.535382	-0.314897	0.213163	0.854994	0.0311422	-0.00716661	0.174733	-0.213897	0.0832471	-0.320042	-0.287801	0.358333	0.428459	-0.0975978	0.00461712	-0.335122	0.543968	0.603622	0.267774	0	0.212829	0	-0.492853	-0.229804	-0.270846	-0.147322
BRCA	TCGA-AN-A04A	TCGA-AN-A04A-01A-21R-A034-07	0.564598	0.704857	0.148368	0.27941	-0.588307	0.641189	0.812062	-1.49423	-1.56268	-1.67005	1.4383	0.26234	0.106315	0.110384	0.0769623	0.0689522	-0.27543	-0.103392	0.292172	-0.337297	-0.568392	-0.0211238	-0.382659	0.0955624	0.888501	0.542733	0.452301	0.363879	0.234935	-0.0467992	0.0886078	0.213727	-0.38009	0.0759086	0.648738	-1.05211	0.318887	0.45082	0.493909	0.0917834	0	0.179495	0	-0.588307	-0.848656	-0.520922	0.129946
BRCA	TCGA-AN-A04C	TCGA-AN-A04C-01A-21R-A034-07	0.874094	0.28575	0.711648	-0.379641	-1.52481	-1.10742	-0.921749	NA	NA	NA	-0.29712	-0.10242	-0.225043	-0.263214	0.226933	-0.290751	1.16315	1.05126	-0.339578	-0.350065	0.404721	0.664055	-0.989975	0.925349	1.49886	-0.577888	-0.0897433	-0.127731	-0.315378	0.148594	-0.448213	1.75634	1.74199	-0.752733	0.379817	0.95058	1.38013	-0.174554	1.49938	0.990812	0	1.06794	0	-1.52481	0.129401	0.133174	-0.869488
BRCA	TCGA-AN-A04D	TCGA-AN-A04D-01A-21R-A034-07	0.365076	-1.26291	1.37394	-0.188499	-1.23026	-1.80052	-2.32162	0.909139	0.071065	-0.76833	-0.105429	-0.540451	-0.529978	-0.224993	0.375473	-0.165981	0.808135	-0.201283	-0.810176	-1.59275	0.0643986	-0.369429	-1.95364	0.33239	1.8458	-0.538887	-0.726914	-0.53789	-0.265791	0.351091	-0.619775	1.38062	-0.301803	-1.39802	-1.55602	0.242538	-0.19768	-1.42784	0.796092	1.39355	0	0	0	-1.23026	-1.11457	-1.41148	-1.9846
BRCA	TCGA-AN-A0AJ	TCGA-AN-A0AJ-01A-11R-A00Z-07	-1.96169	0.302463	0.718329	0.604261	1.00645	-0.3721	-0.792527	-1.7053	-1.15196	-1.45353	0.0590002	0.139465	-0.091983	-0.470102	0.443314	-0.0635655	0.491543	-0.288133	0.373018	0.0539802	0.142837	0.365402	0.0558313	0.0190261	2.337	-0.31645	0.207483	0.0625439	-0.662607	0.426624	-0.143597	1.25728	-0.604547	0.0269206	1.11207	0.157238	0.877923	1.14734	0.378966	2.02488	3.60877	0.470459	0	1.00645	1.05092	0.883803	1.1308
BRCA	TCGA-AN-A0AK	TCGA-AN-A0AK-01A-21R-A00Z-07	1.36071	-0.0940273	1.03241	0.360704	-0.379513	-1.51852	-1.57122	-1.55774	-1.46116	-2.27318	-0.636396	-0.236837	-0.457126	-0.554649	0.224498	-1.28068	1.20233	0.14635	-1.10533	-0.448047	-0.126197	0.403941	-0.300401	0.0258231	1.73372	-0.842049	-0.271443	-0.444103	-0.784935	0.157959	-2.43773	1.95661	0.24486	-1.96752	0.289699	-0.480474	1.04129	0.781892	0.385797	1.4153	0	0	0	-0.379513	0.43264	-0.568701	-0.243162
BRCA	TCGA-AN-A0AL	TCGA-AN-A0AL-01A-11R-A00Z-07	0.606965	-0.38064	1.55088	1.49544	-0.661429	0.654082	0.187284	0.720855	-0.0703353	-1.55494	1.52459	0.339206	-0.16947	0.305786	0.141044	0.55138	-0.109392	0.436992	0.479928	0.104025	-0.12467	0.99896	0.720227	0.259337	1.03137	0.563615	0.552581	-0.00843264	0.586062	0.0729407	0.869763	0.329394	0.552156	0.611548	1.3972	-0.192358	1.86423	2.64667	0.73845	0.333752	1.24399	4.20737	1.25255	-0.661429	0.878454	0.6323	0.359775
BRCA	TCGA-AN-A0AM	TCGA-AN-A0AM-01A-11R-A034-07	0.443348	-0.629271	0.344752	0.273764	0.756695	-0.779362	-0.662379	0.118272	0.622115	0.25077	0.602841	0.230717	-0.187423	-0.0813786	0.240617	0.371446	0.955775	-0.151641	0.725179	0.112388	0.0628403	0.913973	0.674391	0.310553	0.475208	0.0657376	0.335902	-0.0839572	-0.0595208	0.168004	0.473908	1.52837	-0.446799	0.646443	1.22168	0.29115	1.80487	1.81989	0.77863	-0.0196203	2.00581	0	6.94047	0.756695	1.12307	0.486774	0.513083
BRCA	TCGA-AN-A0AR	TCGA-AN-A0AR-01A-11R-A00Z-07	-2.55363	1.17675	1.22622	-0.635223	-1.51067	1.17741	-2.74415	2.06675	1.31493	-0.0415628	0.33315	-0.391403	-0.611396	0.111917	0.161236	0.302406	1.86993	-0.0202576	-0.0118717	-0.200002	0.0608601	0.141673	-0.046193	0.323303	1.06033	-0.228973	-0.526606	-0.567698	0.252207	0.0797103	0.0746494	2.26601	-0.0826556	-0.230586	0.633236	0.265992	0.671911	1.24798	0.931255	0.614732	4.07152	4.87354	1.63031	-1.51067	-0.605404	-0.716468	-1.49597
BRCA	TCGA-AN-A0AS	TCGA-AN-A0AS-01A-11R-A00Z-07	0.093001	0.0642724	0.0305066	0.35092	-1.03784	1.05041	-0.0205604	0.109779	0.373654	0.050674	0.801406	0.279657	-0.47803	0.19449	-0.0769991	0.121599	-0.344403	0.0247141	0.0983751	-0.542212	-0.574061	-0.806638	-0.0299233	-0.645406	1.04471	0.18154	0.437866	-0.432029	0.360764	-0.247035	0.285864	0.241104	-0.114471	-0.0785223	0.154422	-1.01584	-0.788103	0.800884	-0.365052	0.303214	0	0	0	-1.03784	-0.55094	-1.0347	-0.546461
BRCA	TCGA-AN-A0AT	TCGA-AN-A0AT-01A-11R-A034-07	-2.4201	1.46577	1.07758	-0.285319	0.224052	-0.0283465	-2.04452	0.75364	0.395386	0.200319	0.552828	0.167883	-0.426812	0.00453605	0.428508	0.534527	1.89399	-0.674766	0.364344	0.432826	-0.237804	0.28459	0.96981	0.393463	2.15971	-0.0443461	0.266573	-0.353034	0.0309025	0.412829	0.482826	2.27795	-1.07117	0.175362	1.56049	-0.297636	0.841714	2.24562	0.877302	1.57725	4.29641	4.34525	0.719958	0.224052	0.828913	0.23541	0.178182
BRCA	TCGA-AN-A0FD	TCGA-AN-A0FD-01A-11R-A034-07	-1.67187	0.875731	0.084822	-0.180381	0.351203	0.0758919	0.390354	-1.55873	-1.3029	-2.20818	0.901982	0.0349417	-0.147707	0.047056	0.0351959	0.28506	-0.778242	-0.209226	-0.077148	-0.682218	-0.428403	-0.508948	0.0372267	0.0540025	0.684407	0.175539	0.127746	-0.000460919	0.166665	-0.0996998	0.467284	-0.377713	-0.58832	-0.435582	-0.15987	-0.780704	-0.350278	0.87921	0.452574	0.000671705	0.283515	0	0	0.351203	0.793081	0.297355	0.346686
BRCA	TCGA-AN-A0FF	TCGA-AN-A0FF-01A-11R-A034-07	0.113074	-0.699842	0.582558	-0.90606	-0.339632	-0.174161	0.00532608	-0.196829	0.282708	0.444066	0.32139	-0.131846	0.109453	-0.170462	0.19589	-0.156475	-1.1587	0.0720966	0.11693	-0.625654	0.197074	0.115852	-0.73614	-0.336132	0.247061	-0.240232	-0.12481	0.262592	-0.20154	0.112679	-0.252011	-0.687816	0.0869418	-0.24822	0.159298	0.230452	0.562836	-0.0508032	-0.0140638	-0.550692	0	0	0.495711	-0.339632	0.254473	0.302015	-0.526001
BRCA	TCGA-AN-A0FJ	TCGA-AN-A0FJ-01A-11R-A00Z-07	-2.84463	1.49678	1.42712	1.7577	-0.903865	1.5197	-1.02881	-1.09307	-1.18855	-1.53169	1.36278	0.120833	-0.248045	0.236013	0.203787	0.957516	0.807419	-0.354233	-0.0173408	-0.155221	-0.902357	-0.453998	0.543794	-0.833673	1.52882	0.522198	0.216766	-0.144505	0.452958	0.140746	1.32255	1.3174	-0.526652	-0.258694	0.830647	-1.58478	-0.215304	1.74993	-0.560564	0.919939	0.345724	0	0	-0.903865	-0.381412	1.94067	-0.0194563
BRCA	TCGA-AN-A0FK	TCGA-AN-A0FK-01A-11R-A034-07	1.30619	-0.195445	0.0198688	1.07414	-1.09844	-1.1469	-0.615383	-0.716477	-1.53054	-0.321173	-0.43338	-0.249061	-0.205867	-0.155266	-0.0246022	-0.248564	-0.333295	0.251708	-0.58332	-1.04006	-0.369929	0.455429	-0.447845	0.0926407	0.880485	-0.653185	-0.303914	-0.168656	-0.140952	-0.190326	-0.377527	0.186796	0.446078	-1.2147	-0.725482	-0.807003	1.0609	0.103494	0.479185	0.490935	0	0	0.500444	-1.09844	-0.897798	-0.702068	-1.3958
BRCA	TCGA-AN-A0FL	TCGA-AN-A0FL-01A-11R-A034-07	-3.41894	-0.148283	-0.101599	0.241889	-1.38235	-0.97968	-1.6957	1.17616	-0.0199521	-0.97423	0.0572135	-0.0680582	-0.722294	-0.0210125	-0.222391	-0.424165	-0.0530133	0.838131	-1.12382	-0.291897	0.416326	1.12141	0.355747	1.60562	0.862036	-0.407063	-0.0119546	-0.779165	0.0522653	-0.425878	-0.934595	0.38682	1.22355	-1.69875	0.448428	0.688926	2.04837	1.41457	2.32995	0.464335	0.278597	0.518968	0	-1.38235	-1.5263	-1.66899	-1.2596
BRCA	TCGA-AN-A0FN	TCGA-AN-A0FN-01A-11R-A034-07	0.286443	-0.499172	-0.663161	0.492094	0.861346	1.79796	1.98055	NA	NA	NA	2.11706	0.280204	0.191668	0.465401	0.0194202	0.662439	-2.39226	-1.10513	1.0328	-0.710257	0.179523	-0.597621	-1.36154	-0.602856	0.185411	1.13054	0.485424	0.38007	0.844884	-0.106826	1.11243	-2.39231	-2.21145	1.18768	0.0941297	0.448066	-0.445898	-0.654412	-0.240826	-0.801695	0	0.173754	0.45958	0.861346	1.29321	1.48753	0.936861
BRCA	TCGA-AN-A0FS	TCGA-AN-A0FS-01A-11R-A034-07	-0.428267	-0.439411	-0.986407	-1.2779	0.435655	0.74715	0.770211	-0.234355	-0.569846	0.57823	0.566833	0.0404526	-0.0320206	0.108755	0.036021	0.31749	-1.36617	-0.12362	0.487957	-0.31181	0.610561	-0.0846222	-1.12173	-0.447543	0.703712	-0.00759656	0.111185	0.0764749	0.260369	-0.102265	0.519679	-1.29109	-0.44883	0.320981	0.553865	1.15085	0.368938	-0.325002	-0.104114	-0.12855	0	0	0	0.435655	-1.80381	-0.84173	-0.468876
BRCA	TCGA-AN-A0FT	TCGA-AN-A0FT-01A-11R-A034-07	0.842792	-0.809134	-1.3079	0.192745	-0.944405	0.462722	-0.334803	-0.525526	-0.370135	-0.65981	0.494727	0.0909697	-0.504374	-0.057336	-0.198645	-0.412451	-0.266124	0.282126	-0.84388	-1.05672	-0.341374	-0.28021	-1.15841	1.07007	-0.134906	0.0212367	0.186922	-0.537307	0.0654078	-0.402887	-0.642596	0.138627	0.355635	-1.41051	-0.601321	-0.86084	-0.0248277	-0.462632	1.66714	-0.722928	1.00199	0	0	-0.944405	-0.327395	-0.370739	-1.19577
BRCA	TCGA-AN-A0FV	TCGA-AN-A0FV-01A-11R-A00Z-07	0.640463	-1.71444	0.0270458	1.20249	-1.18375	0.254147	0.15997	1.3536	0.955892	0.663494	1.21067	0.191145	-0.62716	0.0768618	0.115303	-0.310928	-0.361807	-0.0990459	0.603699	0.595716	-0.508223	0.83211	0.580041	0.108116	0.456201	0.434405	0.346373	-0.597515	0.226015	0.0126449	-0.540706	0.186373	-0.314735	0.544171	2.05718	-0.9787	1.66619	1.95728	0.602829	-0.265539	4.26912	3.38839	0	-1.18375	-0.92653	-2.18191	-0.47958
BRCA	TCGA-AN-A0FW	TCGA-AN-A0FW-01A-11R-A034-07	0.198771	-0.0516386	-0.110798	-1.34905	-1.25819	-0.244386	-0.305153	0.420652	-0.186328	0.132803	-0.0422466	-0.273483	-0.368759	-0.0134961	0.233728	-0.123243	-0.0303453	0.0932026	-0.240154	-0.744445	0.0479671	0.131289	-0.899368	0.213642	1.24941	-0.450152	-0.322766	-0.339879	0.0579452	0.144966	-0.288984	0.643016	0.125474	-0.801335	-0.164722	0.00538664	0.641081	0.0656268	0.623665	0.760575	3.90428	0	0.766714	-1.25819	-0.332737	0.0965728	-0.77723
BRCA	TCGA-AN-A0FX	TCGA-AN-A0FX-01A-11R-A034-07	1.02082	0.937635	0.927313	0.0617035	-0.533484	0.730443	-0.0982858	0.344669	0.354644	0.916889	1.78212	0.0458293	-0.304266	0.306186	0.272629	1.13122	0.225515	-1.03832	0.771412	-0.483238	-0.318873	-0.641416	-0.140703	-0.33635	1.45405	0.7042	0.119339	-0.203361	0.560581	0.228344	1.5991	0.691403	-1.63028	0.872939	0.28212	-0.48222	-0.525274	1.19505	0.0125198	0.661185	0	0	2.86096	-0.533484	-0.105804	-0.261278	-0.159193
BRCA	TCGA-AN-A0FY	TCGA-AN-A0FY-01A-11R-A034-07	1.47955	0.989768	0.809098	-0.192789	-0.386811	-0.233998	-0.134807	0.967911	0.5468	0.664465	0.286952	-0.0349472	-0.354605	-0.0951281	0.395678	0.544512	-0.0426863	-0.298748	0.185442	-0.400364	-0.247301	-0.469862	-0.999825	-0.794982	1.78089	-0.18512	0.025986	-0.340041	-0.106447	0.376189	0.793321	0.53721	-0.695153	-0.158215	0.262739	-0.566463	-0.200785	-0.157979	-0.581384	1.16069	0.176984	0	0	-0.386811	-0.803081	-0.577091	-0.291471
BRCA	TCGA-AN-A0FZ	TCGA-AN-A0FZ-01A-11R-A034-07	-0.456729	-0.527445	-0.410289	-1.3932	-2.04085	-0.530126	0.310948	0.52215	1.08869	0.270047	0.913586	-0.136028	-0.323869	0.341765	0.0908836	-0.814636	-0.740103	0.52149	-0.0353881	-1.33494	-0.0477417	-0.768336	-1.01597	-0.35896	0.85631	0.171152	-0.127041	-0.280912	0.560295	-0.0341981	-1.44621	-0.342733	0.867923	-0.509588	-1.04534	-0.321051	-0.711312	-0.210769	-0.0788142	0.238932	0	4.32676	0	-2.04085	-1.80641	-1.64791	-1.33161
BRCA	TCGA-AN-A0G0	TCGA-AN-A0G0-01A-11R-A034-07	-2.21071	0.0123879	-1.19319	0.944784	-0.442359	1.21513	-1.09177	0.959212	1.92917	1.03029	0.669709	-0.0967872	-0.571292	-0.26264	0.242122	-0.248498	0.551834	0.136197	-0.260561	-0.293787	-0.550125	-0.0562168	-0.247415	-0.851099	1.91718	0.0440884	-0.100383	-0.571669	-0.311805	0.191831	-0.832289	1.03686	0.227604	-0.523001	0.769215	-0.87095	0.264831	1.29143	-0.679866	1.4278	0	0	0	-0.442359	0.399895	1.3954	-0.204121
BRCA	TCGA-AN-A0XN	TCGA-AN-A0XN-01A-21R-A109-07	0.292518	0.151961	-0.172143	0.570656	0.749191	1.74685	1.35443	-1.00033	0.115989	-1.52741	1.30808	0.509131	-0.233942	0.151807	0.036273	0.501189	-1.3236	-1.29379	0.923441	-0.184077	-0.50792	-0.839677	-0.297791	-0.922395	1.16189	0.572378	0.792418	-0.108328	0.287847	-0.0755327	0.925604	-0.972815	-2.40878	1.02818	0.954148	-0.814926	-0.774264	0.466085	-0.694874	0.297643	0	0	0	0.749191	-0.370949	-0.473079	0.977064
BRCA	TCGA-AN-A0XO	TCGA-AN-A0XO-01A-11R-A109-07	-0.467069	-1.08501	-0.215512	-0.80403	-0.32374	0.15017	-0.252492	-0.930819	-1.90723	-0.699454	0.979659	0.146157	0.0065589	0.299325	0.116158	0.241824	-0.392628	0.0930145	0.630541	-0.564262	-0.0257465	-0.110179	0.71513	-0.0205521	1.25141	0.195239	0.247817	0.23427	0.555878	0.000127162	0.36076	0.166073	0.250007	0.535128	0.313307	-0.0529081	0.354912	1.75951	0.381918	0.648646	0	0.368761	0.39574	-0.32374	-1.87046	-1.94348	-1.28799
BRCA	TCGA-AN-A0XP	TCGA-AN-A0XP-01A-11R-A109-07	-0.557367	-1.63056	-0.937934	-0.975619	1.11126	-0.681223	-0.226589	0.308897	-0.02016	0.584869	0.186371	-0.182605	-0.196111	0.111891	-0.0761972	-0.458317	-1.5595	0.596685	-0.36036	-1.85375	-0.573971	-0.607704	-1.76783	-0.662313	0.424761	-0.3009	-0.156148	-0.0850395	0.252791	-0.259775	-0.763867	-1.43266	1.20642	-0.825917	-1.83274	-1.17334	-0.494314	-1.45125	-0.397434	-0.276753	0	0	0	1.11126	-0.995299	-1.24557	-0.0282818
BRCA	TCGA-AN-A0XR	TCGA-AN-A0XR-01A-11R-A109-07	0.18258	-1.69511	0.514197	-1.56808	1.13332	1.21321	-1.28159	NA	NA	NA	0.335258	-0.236955	-0.118463	-0.312402	0.153339	-0.690371	-0.835089	0.658422	-0.739767	-1.27818	-0.623879	-0.991814	-0.664684	-0.261125	0.315092	-0.0983119	-0.259857	0.0235181	-0.390011	0.0630022	-1.11579	-0.442338	1.23442	-1.43709	-0.979455	-1.15037	-1.05825	0.0659743	0.0941133	-0.206406	0	0	0	1.13332	-0.930849	-1.48766	-0.870509
BRCA	TCGA-AN-A0XS	TCGA-AN-A0XS-01A-22R-A109-07	0.322311	-1.77514	-0.901525	-0.767267	0.0477685	0.526622	0.47608	-0.369338	-1.47435	-0.558766	0.998618	-0.138158	0.00943839	-0.0173605	-0.0316204	0.335515	-1.83955	0.0959655	0.222911	-1.1077	0.390929	-0.548936	-1.06595	-0.534006	-0.316413	0.261112	-0.107865	0.134275	0.0282075	-0.187894	0.43802	-1.75843	-0.114464	-0.120986	-0.541541	0.733679	-0.309755	-0.345041	-0.261674	-1.36834	0	0	0	0.0477685	1.07198	0.723598	0.279681
BRCA	TCGA-AN-A0XT	TCGA-AN-A0XT-01A-11R-A109-07	0.180184	0.164048	-0.917222	-1.24714	-0.519585	-0.342854	0.299887	-0.338549	-0.815594	-0.277274	0.223374	-0.383822	-0.384888	0.338732	-0.108208	-0.0263225	-0.657621	0.270973	-0.135098	-1.39658	-0.124879	-1.26748	-2.22011	-0.452653	0.71147	-0.314248	-0.404357	-0.347813	0.700491	-0.290941	0.0547676	-0.0743034	0.37492	-0.468936	-0.935465	-0.377225	-1.40571	-1.71359	-0.136406	0.0134219	0	0	0	-0.519585	-0.545274	0.425362	-1.09556
BRCA	TCGA-AN-A0XU	TCGA-AN-A0XU-01A-11R-A109-07	-0.451993	0.369079	1.35833	1.56205	0.787459	0.741776	-1.61433	2.10358	1.83091	0.228949	0.924794	0.135028	-0.289465	0.294687	0.488981	0.386131	0.306695	-0.444637	1.06784	0.118037	-0.362969	0.511056	0.375896	-0.373413	1.69105	0.221234	0.204697	-0.135703	0.524702	0.500455	0.434814	0.805615	-0.720482	1.22336	1.12383	-0.575553	1.12305	1.40692	0.0808961	1.01043	0	0	0.829165	0.787459	1.09146	0.180414	0.403966
BRCA	TCGA-AN-A0XV	TCGA-AN-A0XV-01A-11R-A109-07	0.212159	0.918296	-0.131887	-0.817925	-0.00616077	0.464929	0.748096	NA	NA	NA	0.851737	0.0508718	0.0471421	-0.00727914	0.204564	0.469963	-0.998282	-0.127722	0.883554	-0.101945	0.852947	0.204193	-0.773198	-0.36658	1.24361	0.17066	0.112938	0.189569	0.0865782	0.124384	0.818125	-0.514358	-0.327993	0.813268	1.05042	1.71946	0.717859	0.035094	-0.0419445	0.447056	0	0	0	-0.00616077	0.550429	0.194143	0.234381
BRCA	TCGA-AN-A0XW	TCGA-AN-A0XW-01A-11R-A109-07	-0.583386	-0.654522	0.251263	0.46655	1.20009	1.08721	0.803429	-0.0641982	0.114577	0.241723	1.22981	0.182928	0.0696925	-0.143085	0.222121	0.190366	-1.55558	-0.368694	1.0676	-0.748374	-0.561346	-0.775108	-0.29785	-0.237245	0.617161	0.513316	0.303295	0.268359	-0.136805	0.157108	0.381096	-1.36805	-1.02151	1.1536	0.0459486	-0.927407	-0.716462	0.705448	0.0662497	-0.271347	0	0	0	1.20009	1.46521	1.13703	1.65325
BRCA	TCGA-AO-A03L	TCGA-AO-A03L-01A-41R-A056-07	-1.22249	0.0628417	1.20834	-0.538408	0.28951	-0.54362	0.742478	-0.564094	-0.634997	-0.703315	0.710692	-0.0261475	-0.11707	-0.0117588	0.327055	-0.151959	-0.39181	0.392898	0.0563239	-1.03458	-0.20473	-0.251527	-1.27733	-0.510109	1.398	0.0294945	0.033094	0.0172328	0.0611337	0.285522	-0.393232	0.0348906	0.731313	-0.26904	-0.33763	-0.384342	0.0538325	-0.699785	-0.269231	0.891033	1.35251	0	1.09003	0.28951	0.297402	0.320812	-0.373693
BRCA	TCGA-AO-A03O	TCGA-AO-A03O-01A-11R-A00Z-07	0.363883	0.354109	1.02974	1.31498	0.936002	-1.33936	-1.07201	-1.66653	-1.23393	-1.95754	-0.50422	-0.210156	-0.333761	-0.772667	0.260544	-0.421162	0.565864	0.157358	-0.392652	-0.814811	0.241674	-0.220007	-0.416102	-0.638459	1.736	-0.721429	-0.277247	-0.259397	-1.18433	0.173934	-0.856293	1.43577	0.163199	-1.09262	-0.44352	0.212866	0.0979526	0.265312	-0.368337	1.43236	0	0	0	0.936002	0.877072	0.739636	0.52528
BRCA	TCGA-AO-A03P	TCGA-AO-A03P-01A-11R-A00Z-07	1.06946	0.857254	-0.548411	-0.831034	-0.802965	-0.911667	-0.473557	-1.42926	-1.39287	-1.34646	0.422861	-0.158066	-0.108536	-0.214178	0.222046	-0.587546	0.690719	-0.278516	-0.237619	-0.966504	-0.0309096	0.45488	-0.545111	0.450524	1.63472	-0.0459253	-0.123542	0.0214557	-0.259195	0.113078	-1.06679	1.48362	-0.724165	-0.849037	-0.413	0.0201393	1.02215	0.260311	0.964522	1.3121	0	0	0.455672	-0.802965	-0.970374	-0.452864	-0.205085
BRCA	TCGA-AO-A03R	TCGA-AO-A03R-01A-21R-A034-07	-0.0751443	1.3109	1.2356	-0.902018	0.432585	0.0649619	-0.94137	NA	NA	NA	0.304318	0.0498683	-0.0694948	-0.253493	0.229105	-0.4202	0.60987	0.162822	-0.243466	-0.414526	0.190761	0.346072	-1.0816	1.41238	0.86051	-0.204788	0.107755	0.0821374	-0.292402	0.172122	-0.799315	1.33329	0.135832	-0.702378	0.579277	0.48057	0.979429	-0.427048	2.07848	0.377085	0	0	0	0.432585	0.806936	1.00708	-0.0908306
BRCA	TCGA-AO-A03T	TCGA-AO-A03T-01A-21R-A034-07	-0.641044	-0.0274623	-0.151879	-1.26402	-0.422926	-0.115205	-0.325677	NA	NA	NA	0.287229	0.0178781	0.0167057	-0.27866	0.0626592	-0.211854	-0.289354	0.257447	0.3609	0.102974	0.10888	-0.420476	-0.298876	1.59221	-0.634147	-0.196538	0.0852389	0.1642	-0.318342	-0.0519721	-0.439912	0.304782	0.249359	0.0927078	1.43638	0.155942	-0.16692	0.844506	2.28412	-1.19197	0.3051	0	0	-0.422926	-0.0435416	0.261186	-0.648744
BRCA	TCGA-AO-A03V	TCGA-AO-A03V-01A-11R-A115-07	0.101343	0.251132	0.258925	-1.3049	-1.05043	-0.535865	0.0948548	NA	NA	NA	0.223879	-0.00941136	-0.161586	0.18106	0.0739661	0.161949	-0.604252	0.561515	0.215089	-1.01832	-0.0107539	-0.136165	-0.569941	-0.633225	0.519354	-0.269047	0.0338657	-0.0612807	0.409364	-0.0555908	0.195685	-0.0897	1.06084	-0.114193	-0.479782	-0.185693	0.339538	0.372493	-0.356798	-0.273706	0.243327	0	0	-1.05043	-0.396269	-0.367213	-1.27702
BRCA	TCGA-AO-A0J2	TCGA-AO-A0J2-01A-11R-A034-07	1.17824	0.234718	1.31415	-0.693	1.89698	-1.11267	-1.56943	-1.70352	0.479055	-1.87166	0.332713	0.229924	-0.512675	-0.379083	0.233558	-0.70613	0.490304	0.985307	-0.087627	0.538497	0.162618	1.28235	1.2177	0.720954	0.769384	-0.124945	0.310188	-0.469444	-0.49905	0.173819	-1.41643	1.05352	1.5555	-0.492923	1.6569	0.512644	2.2378	2.53542	1.29047	0.327337	0.559414	0.149897	0	1.89698	0.824102	1.033	0.185704
BRCA	TCGA-AO-A0J3	TCGA-AO-A0J3-01A-11R-A034-07	-0.164361	-0.427344	0.207601	-2.25153	-0.857183	-2.42525	-1.10715	-1.03661	0.441749	-1.18237	-0.411905	-0.534856	-0.316141	-0.773216	0.127285	-1.52326	0.0265312	0.131231	-1.14658	-1.41328	-0.91814	-0.388839	-2.32629	0.721546	0.985923	-0.696663	-0.706176	-0.304771	-1.07772	-0.000341951	-2.79021	0.600171	0.0545441	-2.12222	-1.03391	-1.65198	-0.213471	-1.83764	1.24278	0.621713	1.4271	0	0	-0.857183	-0.999593	-0.630617	-1.47671
BRCA	TCGA-AO-A0J4	TCGA-AO-A0J4-01A-11R-A034-07	1.10837	0.800766	1.21162	0.216537	1.20757	1.0668	-0.318335	NA	NA	NA	1.28508	0.219957	-0.266448	0.187395	0.337231	1.11404	-0.011302	-0.203979	0.616079	-0.184454	-0.241006	-0.241687	-0.0891802	-0.81006	1.59513	0.343584	0.376002	-0.122116	0.309093	0.309695	1.5989	0.483083	-0.331798	0.570805	0.805445	-0.421652	0.064273	0.98336	-0.618108	0.811623	1.68754	0	0	1.20757	0.900157	1.10921	0.784907
BRCA	TCGA-AO-A0J5	TCGA-AO-A0J5-01A-11R-A034-07	0.18392	-1.81443	0.26328	0.0532646	-0.80199	0.548261	1.45553	0.459165	-1.61993	1.01766	0.935487	-0.037038	-0.37749	0.137391	0.0659446	0.223461	-1.69464	-0.354676	0.273479	-0.646354	0.466828	-0.511381	-1.04164	-1.09201	0.412048	0.240421	0.0243886	-0.302034	0.309812	-0.0487521	0.41644	-1.61866	-0.793922	0.149467	0.196426	0.744625	-0.25194	-0.32153	-0.881569	-0.547192	0.181709	0	0	-0.80199	-0.722018	-0.629071	0.0487806
BRCA	TCGA-AO-A0J6	TCGA-AO-A0J6-01A-11R-A034-07	-2.77067	1.25217	0.921542	1.13809	1.09881	0.42263	-2.16788	-1.11837	0.0158345	-2.11822	0.426394	-0.0793635	-0.449637	-0.226475	0.14228	0.0475382	1.1063	0.0440305	-0.248395	-0.412951	-0.0834524	-0.00843961	-0.0522242	-0.177327	0.816425	-0.177124	-0.0497817	-0.351448	-0.3293	0.0599109	-0.325369	1.52903	0.125068	-0.602465	0.344054	-0.0438684	0.426771	0.892328	0.183205	0.359846	0	4.73071	0.899397	1.09881	1.15108	1.1143	0.0844581
BRCA	TCGA-AO-A0J7	TCGA-AO-A0J7-01A-11R-A034-07	0.88035	1.3194	0.670057	-2.55361	-1.18883	-1.37683	-1.2287	0.0816047	-1.08437	0.209276	-0.168256	-0.276294	-0.158248	-0.34512	0.159238	-0.0656401	0.663829	0.156067	-0.822057	-1.27774	-0.308876	0.268781	-1.2137	0.191799	1.24424	-0.474597	-0.360292	-0.0822179	-0.438815	0.0597956	-0.245275	1.47001	0.221261	-1.66527	-0.608187	-0.507273	0.826726	-0.613828	0.616662	0.833674	0.225036	0	0	-1.18883	-0.752081	-1.63078	-1.41549
BRCA	TCGA-AO-A0J8	TCGA-AO-A0J8-01A-21R-A034-07	0.660602	-1.45539	-0.406305	-0.427608	0.343994	-0.138491	-0.393024	0.328814	-2.11807	0.228178	0.895569	-0.00174716	0.0407951	-0.280353	0.00903972	-0.0778262	-0.858596	0.374952	0.0889467	-0.48115	0.414523	-0.0374475	-0.620041	-0.255213	-0.169206	0.264827	0.0418391	0.184064	-0.393071	-0.148651	-0.196275	-0.396747	0.71862	-0.278825	0.289884	0.859686	0.394929	0.31603	0.132198	-1.13376	0	0	0	0.343994	0.223604	0.274761	-0.567566
BRCA	TCGA-AO-A0J9	TCGA-AO-A0J9-01A-11R-A034-07	1.13316	-0.709177	0.137526	-0.453479	-0.650882	2.03277	0.749684	-0.795746	-1.52906	-1.02094	1.4792	0.0858501	0.0927463	0.26645	0.0778417	0.37034	-0.933525	-0.586428	0.943861	0.414727	0.759839	-0.0328159	-0.21013	0.695245	-0.408578	0.614515	0.214301	0.289294	0.537464	-0.0201521	0.713091	-0.5013	-1.36904	1.16881	1.6179	1.65751	0.471557	0.848295	1.28685	-1.14403	0	0.477146	0.941901	-0.650882	0.44898	0.614927	0.337207
BRCA	TCGA-AO-A0JA	TCGA-AO-A0JA-01A-11R-A056-07	0.140306	-1.19569	0.298046	-0.31512	-0.0682587	0.0791696	1.24165	NA	NA	NA	0.927777	-0.0605078	0.00186449	0.137456	0.144238	0.288371	-1.55209	0.157598	0.431436	-1.73871	-0.363055	-0.607663	-1.30685	-0.838013	0.892534	0.185751	-0.00454216	0.135094	0.274926	0.0515535	0.409738	-1.51869	0.157553	0.298973	-1.64676	-0.821559	-0.459867	-0.677792	-0.623206	0.116066	0	0.180778	1.60867	-0.0682587	0.357733	-0.102671	0.377389
BRCA	TCGA-AO-A0JB	TCGA-AO-A0JB-01A-11R-A32Y-07	-0.759922	0.284415	-0.206512	-0.998464	-1.81271	0.515116	-0.857681	-1.24305	-1.1903	-1.39584	1.12711	0.0994092	-0.342831	0.337563	-0.0173538	0.359091	0.860623	0.407307	-0.318948	-0.853889	-0.310819	-0.583666	-0.64133	1.38557	-0.421994	0.346256	0.166547	-0.286765	0.680707	-0.154389	0.683887	1.2788	0.517269	-0.690265	-0.253501	-0.638146	-0.489222	0.0645132	2.06181	-0.808135	0.969244	0	3.51126	-1.81271	0.49715	0.271185	-1.07507
[truncated: 10,391 more rows]
[truncated: 40 more columns]

## Sheet: pathway signatures
		739	476	651	2364	805	406	31	610	607	203	432	13	3	384	62	30	27	42	116	79	216	14	11	5	51	212	854
[truncated: 20,533 more rows]
