# Supplementary material for: Pan-Cancer Molecular Classes Transcending Tumor Lineage Across 32 Cancer Types, Multiple Data Platforms, and over 10,000 Cases
Source: Oxford University Press journal article supplement (doi:10.1158/1078-0432.ccr-17-3378), 2018-02-09
Supplement: 10780432ccr173378-sup-192275_2_supp_4535396_p3bxd5.xlsx [file 10780432ccr173378-sup-192275_2_supp_4535396_p3bxd5.xlsx]

## Sheet: expo results
Supplementary Data 6, related to Figure 7
		Cancer type	Colon	Colon	Colon	Colon	Colon	Colon	Colon	Colon	Colon	Colon	Colon	Colon	Colon	Colon	Colon	Breast	Breast	Breast	Breast	Breast	Breast	Kidney	Kidney	Kidney	Kidney	Kidney	Kidney	Kidney	Kidney	Kidney	Ovary	Ovary	Ovary	Ovary	Ovary	Ovary	Ovary	Ovary	Ovary	Ovary	Lung	Uterus	Uterus	Uterus	Uterus	Uterus	Uterus
2041		Assigned class	1	1	1	1	1	1	1	1	1	1	1	1	1	1	1	1	1	1	1	1	1	1	1	1	1	1	1	1	1	1	1	1	1	1	1	1	1	1	1	1	1	1	1	1	1	1	1
	ID	NAME	GSM325806	GSM179859	GSM152780	GSM152630	GSM138037	GSM117720	GSM117709	GSM89026	GSM76512	GSM76501	GSM53083	GSM46931	GSM46864	GSM46865	GSM46856	GSM89010	GSM46894	GSM46871	GSM46820	GSM38094	GSM38081	GSM179846	GSM137934	GSM117721	GSM76570	GSM76558	GSM53127	GSM53122	GSM46944	GSM46875	GSM301676	GSM203744	GSM137917	GSM89070	GSM88984	GSM76567	GSM76504	GSM53144	GSM53100	GSM46910	GSM53167	GSM353907	GSM231920	GSM179917	GSM152694	GSM152642	GSM137913
class-specific genes	235614_at	TMEM151A	-0.539	-1.098	-0.72	1.604	1.93	0.399	-0.018	0.521	0.88	-0.171	0.361	-1.098	-0.784	-0.812	-0.822	0.256	1.208	-0.47	-0.095	0.143	-0.704	0.767	-0.257	1.125	-0.437	1.626	1.603	0.442	0.016	-0.719	0.438	1.125	-0.175	2.266	0.725	-0.138	0.454	-0.4	0.633	-1.088	-0.194	0.336	0.345	-0.305	-0.006	1.803	1.67
class-specific genes	214346_at	C1QL1	-1.623	-0.42	0.319	-0.505	1.596	-0.693	3.038	0.848	-0.505	-0.476	-0.659	-1.841	-1.558	-0.171	-1.324	-0.347	-1.676	-0.562	-0.184	-1.61	0.244	-0.976	-0.191	2.016	0.174	-0.491	-0.546	0.427	-1.721	-1.289	-0.018	0.15	0.827	-0.67	-0.471	-0.324	1.313	0.644	0.018	-1.823	-0.266	-0.593	1.531	0.371	0.277	0	-0.267
class-specific genes	219529_at	CLIC3	-0.603	0.344	0.14	0.093	0.292	-0.456	0.555	-0.08	1.565	0.288	0.518	1.125	0.496	1.306	-0.363	1.293	-0.151	-0.212	0.174	1.138	1.272	-1.73	1.2	-1.391	0.643	0.847	0.355	0.448	0.46	-0.765	0.495	0.206	1.748	-2.473	1.398	-0.331	0.183	-0.17	1.972	-2.627	-0.284	-0.193	0.788	1.202	0.632	0.936	-0.008
class-specific genes	242517_at	KISS1R	0.427	1.315	-0.069	-0.184	0.641	0.035	2.356	1.705	1.147	0.651	-0.647	0.866	-1.867	0.486	-2.579	-0.273	2.422	-1.224	0.91	0.168	-0.662	-1.696	1.033	0.675	1.185	0.11	0.414	-1.112	1.142	0.74	-1.17	-0.896	-0.358	-0.912	0.946	-0.084	0.067	0.781	-0.319	-0.564	0.789	-0.021	-1.11	1.096	0.547	-0.134	0.255
class-specific genes	xx	NA	NA	NA	NA	NA	NA	NA	NA	NA	NA	NA	NA	NA	NA	NA	NA	NA	NA	NA	NA	NA	NA	NA	NA	NA	NA	NA	NA	NA	NA	NA	NA	NA	NA	NA	NA	NA	NA	NA	NA	NA	NA	NA	NA	NA	NA	NA	NA
class-specific genes	219704_at	YBX2	0.324	-0.521	-0.092	0.527	0.702	1.296	0.565	0.204	0.251	0.785	-0.443	0.698	1.374	0.318	-0.263	-1.796	0.732	0.289	1.881	-0.129	0.899	-1.514	1.082	0.23	-1.22	-0.932	0.387	-1.117	-0.397	0.45	-1.599	-0.602	-1.417	-0.645	-1.758	0.201	0.386	-0.312	0.151	-0.243	-0.911	1.332	-0.979	0.955	-1.936	-1.919	-0.929
class-specific genes	241528_at	MAPK15	-0.909	0.314	-0.816	0.375	0.138	-1.64	0.223	-0.213	-0.696	0.347	-0.176	-1.732	-0.998	-0.666	-1.361	0.825	0.198	-1.454	-0.812	-1.296	-0.61	0.014	-0.205	1.326	0.927	0.802	0.255	0.893	-0.997	-1.674	-0.261	0.761	0.558	-0.382	-0.772	0.857	-0.35	1.658	0.498	-1.57	-0.563	-0.793	0.762	0.608	1.017	-1.516	0.566
class-specific genes	219707_at	CPNE7	0.168	0.266	0.502	0.24	0.045	-3.305	-0.252	-0.53	1.22	0.337	0.32	-0.713	-0.631	0.64	1.491	0.31	1.357	-1.004	-0.571	0.388	-1.516	-0.312	-0.042	0.516	0.564	-0.478	0.957	1.022	-1.144	-0.558	0.234	-0.432	0.417	0.358	1.5	-0.528	0.525	-0.146	0.328	-1.341	-0.643	0.922	0.425	-0.768	0.23	0	0.322
class-specific genes	205742_at	TNNI3	-0.175	-0.625	-0.172	-1.076	0.333	0.65	-2.668	0.152	-0.414	-2.253	0.152	0.54	-1.552	0.048	0.046	0.865	1.115	-0.363	-0.698	0.195	-0.035	0.211	0.347	0.602	0.146	0.443	0.191	-0.004	0.004	-0.904	-1.038	0.542	0.405	-0.687	1.462	0.378	-0.159	0.806	-1.073	0.169	0.494	1.997	1.282	-0.647	-1.994	-0.093	0.19
class-specific genes	219305_x_at	FBXO2	-1.65	0.822	-1.221	-0.923	1.345	0.303	-0.832	0.757	1.521	-0.274	0.497	-0.157	0.035	-0.034	-1.072	0.294	-1.009	0.034	0.567	0.052	-1.247	0.675	0.199	0.877	0.671	0.956	0.404	0.635	-0.28	-1.235	-1.382	-0.006	1.009	0.281	1.037	-1.124	0.683	-0.012	-0.225	-0.558	-0.097	2.739	-0.23	1.427	-0.459	0.262	-0.798
class-specific genes	202411_at	IFI27	0.102	0.489	-0.089	-0.016	-2.541	1.861	0.945	0.149	-0.839	0.714	-0.494	0.559	0.039	0.284	0.516	1.475	-0.576	1.962	0.24	-0.028	1.648	-0.752	0.682	1.075	-1.419	0.02	-0.785	1.407	-0.274	0.034	0.861	1.166	0.548	1.267	1.12	0.866	0.172	0.075	0.643	0.804	-1.336	0.938	1.002	-0.186	1.362	0.647	1.167
class-specific genes	223549_s_at	ESPN	-0.332	0.551	0.718	0.573	0.681	0.344	0.802	0.612	0.748	0.2	0.743	0.221	0.143	0.083	0.367	0.1	0.547	-0.808	0.532	0.372	-0.853	0.72	0.484	0.223	1.337	1.254	0.436	-1.483	-0.118	1.173	0.58	0.177	0.126	0.754	0.875	0.483	0.785	0.944	0.383	0.247	-0.675	1.038	0.476	0.392	-0.082	-2.001	0.717
class-specific genes	xx	NA	NA	NA	NA	NA	NA	NA	NA	NA	NA	NA	NA	NA	NA	NA	NA	NA	NA	NA	NA	NA	NA	NA	NA	NA	NA	NA	NA	NA	NA	NA	NA	NA	NA	NA	NA	NA	NA	NA	NA	NA	NA	NA	NA	NA	NA	NA	NA
class-specific genes	206771_at	UPK3A	-0.92	-1.119	0.601	-0.307	-0.793	0.018	-0.577	-0.445	0.261	0.377	0.571	-0.229	-0.664	-0.687	0.081	0.003	-0.33	-0.734	2.997	-0.8	-0.544	-0.898	-0.627	1.414	0.918	1.609	-0.324	-0.435	-0.138	-1.811	-0.158	-0.291	-0.239	-0.027	-0.158	0.536	0.828	1.512	0.327	-1.922	0.403	-1.425	1.732	-0.65	0.37	-0.484	0.842
class-specific genes	206234_s_at	MMP17	-0.126	-0.407	1.421	0.572	-1.195	0.065	-1.826	1.203	-0.654	0.65	0.862	-1.327	-0.689	1.127	-0.818	0.619	1.106	-0.16	0.175	-2.038	0.293	-0.003	1.219	2.254	-0.653	-0.462	-0.258	1.283	0.518	0.684	-0.182	-0.497	-0.415	-1.468	-1.001	-1.286	1.522	1.918	1.185	-0.461	0	0.994	0.837	2.264	1.057	1.013	1.036
class-specific genes	221276_s_at	SYNC	-1.003	-0.739	-0.551	0.111	-1.862	-0.093	0.444	-0.267	0.404	-2.422	-0.224	-1.086	-2.263	-0.373	-1.252	0.522	0.37	-0.615	-0.657	-1.232	-0.953	1.136	-0.144	0.238	-1.616	0.447	0.107	0.815	-1.49	-2.988	-1.426	-0.429	0.379	0.288	0.139	-0.913	-0.03	0.192	0.457	-0.203	-0.94	-0.959	-0.577	0.811	-1.835	-0.604	-0.068
class-specific genes	205473_at	ATP6V1B1	-0.033	0.333	0.088	-1.435	0.674	-1.667	-0.641	0.239	0.435	-0.166	1.31	-0.019	0.389	-0.717	-0.283	0.563	-0.99	-0.914	0.963	2.218	0.189	-1.468	0.773	-0.287	-0.288	1.251	0.237	-0.178	0.37	-0.448	-2.7	0.898	-0.588	1.135	-1.131	1.512	1.386	0.965	0.283	0.844	0.619	0.677	0.577	-0.503	-1.422	0.425	0.642
class-specific genes	202525_at	PRSS8	0.91	0.149	0.639	0.768	0.142	0.782	0.422	1.018	0.62	-0.153	0.623	0.625	0.95	1.104	0.957	0.758	1.742	1.19	2.59	1.455	1.528	0.659	1.25	0.521	-0.989	-2.291	-0.141	0.838	-0.426	0.627	0.951	0.144	-0.154	-0.223	0.399	0.514	0.158	0.134	-3.217	-0.2	-0.566	0.734	-0.158	0.322	-0.138	0.044	-0.433
class-specific genes	214635_at	CLDN9	-0.484	-1.983	-0.232	1.007	-1.135	-0.98	-0.68	0.81	0.055	0.883	1.818	-1.247	-0.663	1.402	-3.032	0.336	-1.352	-0.445	-1.853	0.837	0.354	-0.459	-0.696	1.463	0.492	1.819	-0.126	0.708	-0.632	-0.678	0.182	-0.934	0.4	-0.751	-1.267	0.504	-1.168	0.988	0.332	-1.775	-0.752	1.534	1.303	-1.542	0.356	0.262	-0.734
class-specific genes	205759_s_at	SULT2B1	1.525	0.345	0.407	-0.182	-0.114	-0.449	0.302	-0.19	-0.07	0.882	0.612	-0.346	-0.298	1.52	0.607	0.995	-0.701	1.06	0.674	0.996	0.445	-0.952	0.693	-0.419	0.19	0.792	0.258	-0.905	0.033	-1.862	0.708	-0.81	0.816	0.012	0.313	-2.34	-0.485	-0.736	-0.768	-0.145	-0.83	-0.209	-1.678	0.166	0.53	0.394	1
class-specific genes	223631_s_at	C19orf33	0.18	0.901	0.143	-0.966	1.204	-0.262	0.852	0.574	1.486	-0.265	0.253	0.98	0.97	1.492	0.831	0.555	-0.864	1.039	1.444	0.138	0.635	0.848	0.63	0.263	-0.183	0.217	-0.047	1.013	0.15	1.006	0.541	-0.992	0.441	-0.116	1.021	0.239	0.074	-0.237	0.719	0.754	0.108	1.737	1.212	0.107	0.236	0.653	0.787
class-specific genes	243292_at	FAM132A	-0.098	0.671	0.37	0.073	0.654	0.703	0.62	0.619	0.695	-0.305	0.198	0.303	0.763	1.084	0.485	-1.383	0.051	-0.795	0.324	0.133	0.366	0.225	1.105	0.71	0.856	0.577	1.001	0.584	-0.226	0.689	2.3	0.682	-0.134	-0.274	0.455	0.276	0.094	1.188	-1.28	-0.176	1.114	0.541	1.209	0.986	-1.669	0.623	-0.607
class-specific genes	204272_at	LGALS4	0.104	0.377	0.328	0.088	0.605	0.264	0.494	0.328	0.034	0.061	0.172	0.354	0.546	0.283	0.487	0.06	-0.884	-0.513	-0.465	-2.098	-1.112	-0.161	-0.436	1.338	-0.317	-0.19	0.17	-1.513	-0.439	0.594	2.778	0.031	2.405	-1.036	-0.143	0.027	-1.549	0.274	-1.322	-0.34	0.114	-0.198	2.097	-0.548	0.332	-0.188	0.535
class-specific genes	208584_at	SNCG	-1.215	0.954	-2.134	0.426	-0.257	0.542	1.168	1.09	-0.18	-0.655	1.484	-1.996	-0.535	0.213	0.102	1.06	-0.121	-0.939	-0.208	-1.866	-1.182	0.611	-1.468	0.784	0.142	-0.303	1.364	-0.938	0.981	-0.811	-1.338	0.336	-0.136	0.717	0.2	0.671	-0.69	1.511	1.113	0.346	-0.416	-0.488	0.745	1.254	0.526	-1.791	1.563
class-specific genes	213201_s_at	TNNT1	-0.186	1.88	0.095	-0.191	0.291	0.525	1.306	-0.836	0.103	-0.859	-0.457	-0.261	-0.422	0.512	-0.478	1.149	1.892	0.38	2.251	2.231	-0.691	-0.613	3.153	1.715	1.041	1.878	0.011	0.077	-0.522	-1.135	-1.474	0.118	-0.937	-1.853	0.755	0.601	0.158	0.4	0.3	0.226	0.608	2.343	1.834	-0.563	0.226	1	-0.382
class-specific genes	221163_s_at	MLXIPL	0.71	0.491	-0.582	0.589	1.539	0.254	-0.379	0.088	0.841	0	1.341	0.619	0.055	1.003	0.665	0.555	-0.516	-0.23	-0.119	0.787	-0.675	0.541	0.384	0.276	0.552	1.306	0.743	-1.021	0.077	0.565	-1.091	-0.076	1.8	-0.778	0.577	-0.056	0.113	-1.019	1.035	-1.174	0.615	0.694	-0.816	0.456	0.512	1.193	0.844
class-specific genes	210472_at	MT1G	0.533	-0.425	0.373	0.277	0.352	1.381	0.584	-0.656	-1.879	-0.262	1.222	1.325	-0.526	-1.158	0.419	0.39	0.999	0.133	-2.542	-1.81	-1.091	0.223	-0.813	-1.221	-0.44	0.848	1.179	-0.4	0.183	-2.569	-0.089	-1.324	0.012	0.148	-0.64	0.788	-0.671	-1.404	1.07	-1.081	0.638	0.971	-0.164	-1.193	0.714	-1.653	-0.523
class-specific genes	210021_s_at	CCNO	0.792	0.172	-0.786	-0.193	1.447	-0.76	0.7	0.462	1.04	0.945	1.211	0.685	0.661	-0.209	0.134	-0.948	0.892	0.241	-0.054	-1.108	0.457	1.115	1.355	-0.092	0.576	1.05	0.3	0.923	-0.936	-0.936	0.391	-0.26	0.434	-0.607	0.119	0.033	0.82	1.642	-0.853	1.173	0.434	0.647	0.144	0.573	0.65	-0.448	0.972
class-specific genes	231936_at	HOXC9	-1.361	-0.225	0.132	0.175	0.183	-0.11	0.619	-0.335	0.885	0.017	-0.15	-1.139	-2.165	0.6	-2.777	0.918	1.484	-1.033	0.063	0.496	-0.854	1.033	0.885	0.283	0.834	0.156	-0.278	0.752	0.024	0.152	-0.557	-0.438	0.577	-0.243	-1.696	-0.727	-0.474	-2.56	0.351	-2.841	0.076	-0.184	1.55	-0.02	0.014	-0.935	0.128
class-specific genes	205334_at	S100A1	-1.713	-0.963	-0.405	-0.621	1.017	-0.85	-0.543	-1.622	0.315	-0.148	-0.847	-0.2	-1.162	1.108	-0.036	0.694	-0.601	0.074	-0.245	-0.993	-0.932	0.123	0.736	0.385	0.587	1.093	1.941	0.968	-0.467	-1.131	-1.011	0.091	-0.782	1.339	1.048	1.202	1.106	0.793	1.661	1.259	0.667	1.579	1.915	-0.663	-0.602	-0.578	0.661
class-specific genes	xxx	NA	NA	NA	NA	NA	NA	NA	NA	NA	NA	NA	NA	NA	NA	NA	NA	NA	NA	NA	NA	NA	NA	NA	NA	NA	NA	NA	NA	NA	NA	NA	NA	NA	NA	NA	NA	NA	NA	NA	NA	NA	NA	NA	NA	NA	NA	NA	NA
class-specific genes	222957_at	NEU4	-0.527	0.447	0.001	0.68	-0.407	0.245	0.667	0.01	1.006	0.135	0.256	1.355	-0.246	-0.441	0.439	-0.028	-2.107	0.102	-1.484	0.318	-1.041	-1.746	0.84	0.649	0.615	-0.278	-0.347	-1	0.67	-0.396	0.239	-0.639	0.783	0.493	-0.257	0.386	0.616	0	0.132	-0.114	0.606	0.199	0.102	0.216	-0.874	-0.529	-1.848
class-specific genes	205744_at	DOC2A	-0.56	0.425	-0.83	-1.491	1.11	0.61	0.101	0.527	-0.65	-1.522	0.316	-2.232	-0.662	-1.882	-0.629	0.435	0.926	-0.102	0.534	0.644	-1.168	0.403	0.796	0.253	0.713	0.648	-0.246	0.196	-0.052	1.314	-1.547	0.501	0.916	-1.577	-2.138	1.268	-1.739	-0.776	0.77	-0.739	0.49	-1.036	0.02	0.162	-1.436	-2.034	0.23
class-specific genes	214203_s_at	PRODH	-0.483	-1.347	-0.511	2.618	1.71	0.827	-0.501	-3.525	1.702	0.057	0.018	-0.515	-0.572	-0.623	-0.605	0.019	0.618	-0.435	-0.096	0.673	0.535	-1.155	-0.343	0.904	-0.614	-0.323	1.151	-0.223	-0.038	1.371	0.486	-1.654	-0.765	-1.947	1.241	-0.008	0.334	-0.246	0.756	-3.568	0.836	0	1.748	0.431	0.528	-0.269	0.445
class-specific genes	203953_s_at	CLDN3	0.588	0.459	0.838	0.863	-0.586	0.607	0.104	0.764	-0.519	-0.664	0.211	0.5	0.859	-0.222	0.518	0.625	-0.533	0.097	1.288	1.434	1.534	2.329	0.701	0.406	-0.054	-0.044	-0.12	1.695	-0.447	-0.146	0.058	0.613	-0.602	0.286	-0.322	0.322	-0.064	0.559	-0.763	-0.09	-2.35	0.455	0.481	0.47	0.044	-0.395	0.361
class-specific genes	205774_at	F12	0.488	0.579	0.825	-0.123	1.558	0.867	0.443	0.187	0.826	1.212	0.601	1.078	0.635	-0.473	-0.4	0.656	2.85	0.135	-0.395	0.931	0.558	0.167	0.496	0.21	-0.331	-1.465	-2.175	0.775	0.202	0.2	0.937	-1.022	1.648	-0.368	0.748	0.165	0.001	-0.512	-1.546	-0.959	-0.151	0.108	-1.853	-0.245	0.908	1.763	0.646
class-specific genes	205388_at	TNNC2	-0.064	0.645	1.033	1.112	0.038	0.082	0.12	0.199	-0.706	-0.985	-1.849	-0.618	-0.19	-0.431	0.4	-1.434	0.83	0.106	0.978	0.263	0.228	-0.911	-1.023	-0.011	-1.232	-0.697	-0.721	-1.582	1.052	-1.245	1.026	-0.469	0.239	-0.325	0.517	0.639	0.943	1.117	0.773	-0.37	-1.077	0.578	-0.266	-1.045	-0.486	-0.134	0.767
class-specific genes	243110_x_at	NPW	-1.141	0.223	-0.804	-0.312	2.933	-0.023	-0.441	0	0.022	0.422	0.022	2.22	2.621	-0.627	-0.343	-0.061	-0.586	-0.686	-0.045	3.127	0.413	-0.733	-0.026	1.471	0.292	2.555	1.086	0.074	-1.441	-1.159	1.387	3.248	-0.218	-0.298	1.297	-0.333	2.521	0.721	2.675	-0.762	0.24	-0.204	0.662	0.048	-0.087	-0.183	-0.183
class-specific genes	217073_x_at	APOA1	-1.488	1.205	0.714	0.487	-0.859	0.638	0.667	1.178	4.001	0.257	0.025	-0.154	-1.212	1.193	0.611	0.337	-0.137	-1.058	0.057	3.469	-1.62	0.077	1.228	-0.148	1.453	-0.043	1.082	0.205	-0.451	-0.271	2.025	2.438	0.303	0.025	-0.649	0.78	0.084	0.036	1.695	0.959	0.597	2.678	0.956	-2.073	0.896	1.087	-0.029
class-specific genes	203571_s_at	C10orf116	0.489	0.974	-0.004	-0.786	-0.137	-0.44	0.406	0.092	1.678	1.564	-0.474	0.462	0.004	0.87	-0.671	0.197	0.675	0.091	0.513	0.159	-0.293	-0.028	-0.003	0.318	-0.293	-0.055	-0.786	-1.702	0.688	0.984	1.028	1.084	1.809	1.009	1.126	0.374	0.497	0	1.427	0.399	-1.152	0.188	0.56	-0.188	0.174	0.229	0.672
class-specific genes	219692_at	KREMEN2	-1.104	1.034	-0.079	-0.331	0.172	-1.032	-0.57	-0.531	0.546	0.493	0.085	0.48	0.46	-0.41	0.029	1.116	2.37	-0.34	0.737	0.738	1.087	-0.803	2.322	1.686	1.286	2.21	-1.369	0.826	1.264	-1.443	-1.686	0.309	-1.198	-0.211	-0.705	1.221	1.118	1.035	0.985	1.256	2.39	2.053	1.075	-0.624	0.005	0.057	-0.286
class-specific genes	230217_at	RLBP1L1	-2.016	-0.872	0.073	0.194	2.655	0.393	-0.27	0.036	-0.356	-1.676	-0.574	0.721	-2.296	-0.796	-0.895	0.77	-0.213	0.466	-0.578	-1.595	-1.781	0.722	-1.244	0.249	0.61	0.818	1.964	-1.299	-0.899	0.556	-0.691	0.329	-0.239	1.082	-1.61	1.552	-0.337	-0.614	0.135	-1.392	-0.636	-0.185	-0.372	-0.134	1.538	0.329	-0.356
class-specific genes	223587_s_at	AMN	0.938	-0.086	0.548	0.399	-1.063	0.606	0.869	0.909	-0.667	-2.573	-1.178	-0.941	-0.457	-1.498	-0.387	-1.188	-0.41	0.08	-0.42	-0.899	-0.005	1.013	0.041	0.003	-1.879	-1.773	-1.176	-0.059	-1.502	0.812	2.776	-0.216	0.598	-0.242	-1.234	-0.783	-0.583	-0.972	-1.035	-1.011	-0.056	-1.819	1.874	0.221	0.417	0.025	-0.642
class-specific genes	214528_s_at	PAX8	-0.255	-1.151	0.006	-0.006	-1.151	0.745	0.287	-1.043	0.775	-0.873	-1.398	-1.474	0.258	-2.379	0.18	0.33	-0.574	-1.326	-0.077	-0.255	0.321	2.121	0.779	-0.122	-0.635	-0.903	0.022	1.647	-2.158	-1.916	-0.912	0.933	-1.232	0.674	0.524	0.278	-0.574	0.123	0.393	-0.707	0.595	-0.895	0.334	0.169	0.166	-0.286	0.063
class-specific genes	210141_s_at	INHA	-0.138	-0.361	0.403	-0.25	0.569	-1.044	-0.629	-1.2	0.029	-2.431	0.887	-0.776	-2.134	0.58	-1.557	-1.488	0.518	-0.205	-0.054	3.41	0.705	0.149	0.597	1.406	-0.731	-0.761	-0.089	-0.543	-0.756	-2.54	0.842	-0.346	0.032	-0.023	0.022	-0.148	-0.359	-1.265	-1.303	-2.391	-0.491	1.322	0.612	0.37	-1.212	-0.753	0.369
class-specific genes	222194_at	LOC100132923	-0.579	-0.257	-0.677	-0.705	-0.462	1.639	1.559	-0.075	2.008	-0.536	0.225	-1.353	-0.915	-0.67	-1.204	-0.206	-0.02	-1.404	-1.868	-0.953	0.608	-0.612	-1.218	2.025	1.698	1.894	-0.558	-0.832	-1.306	-2.108	-0.991	-0.634	1.534	0.154	0.86	1.573	1.034	0.2	1.252	-1.503	-0.013	0.456	0.084	-0.948	0.363	-0.801	1.092
class-specific genes	206516_at	AMH	1.025	-2.457	-1.679	-1.844	-1.322	0.53	0.018	0.329	0.268	0.991	1.34	-0.238	-0.016	0.836	-0.053	-1.033	0.092	0.512	-0.608	0.058	0.448	0.605	0.318	1.081	1.479	1.447	-1.248	0.381	0.233	0.07	-1.777	-1.049	0.251	-1.374	-0.67	0.691	0.069	0.886	-0.639	-0.332	0.147	-2.961	1.377	0.803	-1.37	0.022	0.072
class-specific genes	xxx	NA	NA	NA	NA	NA	NA	NA	NA	NA	NA	NA	NA	NA	NA	NA	NA	NA	NA	NA	NA	NA	NA	NA	NA	NA	NA	NA	NA	NA	NA	NA	NA	NA	NA	NA	NA	NA	NA	NA	NA	NA	NA	NA	NA	NA	NA	NA	NA
class-specific genes	233669_s_at	TRIM54	-1.005	-0.709	-0.29	-1.097	-0.466	0.669	-1.18	-0.362	-0.622	-0.321	1.401	-1.696	-0.421	-0.229	-0.137	-0.48	0.451	-0.923	-1.007	-0.109	-0.202	-1.348	2.489	1.716	0.06	0.333	1.474	0.159	-0.534	0.635	2.006	-0.469	1.207	0.054	-0.169	-0.721	-0.607	2.255	0.369	-0.486	0.038	1.406	0.451	-0.245	0	1.764	1.175
class-specific genes	220388_at	FER1L4	-0.669	0.683	-0.981	-0.052	0.906	-0.548	0.45	0.937	0.855	-0.324	0.256	0.019	0.179	-0.252	-0.856	0.405	-0.168	-0.516	-0.575	0.946	0.272	0.591	-1.288	0.29	1.009	0.868	0.487	-1.012	-1.504	-0.127	0.507	-1.773	-0.616	-0.733	0.604	-0.87	1.249	0.557	1.444	-1.054	0.801	0.599	0.539	0.405	-0.139	-0.147	0.206
class-specific genes	222814_s_at	ZNHIT2	0.036	0.427	0.467	0.65	-0.934	0.14	0.465	0.511	0.61	-2.11	-0.465	-1.167	0.349	-2.921	-0.033	0.41	0.163	-3.174	-0.493	-1.47	0.329	-1.124	0.525	-1.439	-0.007	0.132	0.716	-0.099	0.335	-0.739	-0.133	0.66	-0.384	-0.125	0.706	0.306	-0.25	0.603	-0.419	-2.356	0.41	-0.45	-1.895	-1.141	0.12	-0.223	0.118
class-specific genes	229372_at	GOLT1A	0.128	0.651	0.743	0.986	0.867	0.843	0.75	0.406	1.125	-0.15	0.74	0.691	0.434	0.52	-0.018	0.474	1.327	0.976	0.725	0.888	0.352	-1.788	-0.051	-0.43	-0.253	1.241	0.98	-1.125	-1.761	1.185	1.109	0.498	0.411	0.408	0.323	-0.522	-0.167	0.517	0.057	0.963	-1.08	0.955	0.224	0.357	0.879	1.406	-0.78
class-specific genes	212859_x_at	MT1E	-0.04	1.022	-0.041	-0.537	0.912	1.166	1.294	-0.509	1.41	0.472	1.42	1.065	1.024	-0.269	0.241	-0.094	-0.031	-0.039	-0.17	-1.229	-1.934	-0.967	1.559	-0.424	1.727	-0.073	-0.229	-0.042	2.382	-0.624	-1.008	-1.285	-0.007	-1.555	0.405	0.254	-1.331	-0.657	-1.082	-0.18	-1.137	-0.093	-0.307	1.296	0.399	-0.935	-0.341
class-specific genes	210451_at	PKLR	-1.521	0.072	-0.632	0.418	-0.031	-0.753	-0.766	0.996	2.491	1.074	0.593	-1.913	-1.521	-0.587	-1.05	-0.57	-1.227	0.091	-1.25	-1.205	-0.199	0.295	1.918	1.673	0.074	1.485	-0.116	-0.338	-1.429	1.844	-0.389	0	0.235	2.004	2.136	0.321	-0.22	-0.436	-0.22	-0.617	-0.063	-0.26	2.16	-0.605	0.09	1.376	1.985
class-specific genes	226654_at	MUC12	-0.204	0.028	0.727	0.76	0.461	0.734	0.389	0.757	-0.417	0.145	-0.395	1.075	0.377	-0.144	1.128	0.625	0.042	-1.112	0.27	-0.526	-0.834	1.803	3.307	0.532	0.964	0	-0.176	1.575	-0.82	-1.231	1.712	-0.807	0.108	0.155	1.08	0.16	0.005	0.636	0.322	-0.532	0.694	-0.178	0.334	2.437	-0.385	0.09	-0.131
class-specific genes	210445_at	FABP6	0.281	-0.32	0.654	-0.934	0.407	0.348	0.143	0.371	2.601	-0.836	-0.75	0.78	-0.084	0.29	0.719	0.668	-0.315	-0.274	0.368	-0.974	1.534	-1.925	1.743	1.266	0.36	1.379	1.446	-1.537	-0.339	-0.262	-0.398	1.429	-1.138	0.459	1.244	1.147	-0.379	-0.761	-1.381	1.073	-1.084	1.234	-0.564	-1.488	0.77	1.737	1.552
class-specific genes	210738_s_at	SLC4A4	-0.04	0.788	0.98	0.082	0.293	0.84	1.006	-0.158	0.631	0.204	0.549	0.465	0.119	-1.514	0.391	-1.135	-1.566	-1.68	0.718	-0.619	-0.884	0.174	0.361	-0.777	-0.895	-1.838	-0.462	1.041	-1.686	-0.277	2.011	-1.393	1.196	0.29	-2.397	-0.025	-1.16	0.656	0.396	-0.173	-0.031	0.846	-1.126	-1.536	-0.981	0.424	0.732
class-specific genes	xxxx	NA	NA	NA	NA	NA	NA	NA	NA	NA	NA	NA	NA	NA	NA	NA	NA	NA	NA	NA	NA	NA	NA	NA	NA	NA	NA	NA	NA	NA	NA	NA	NA	NA	NA	NA	NA	NA	NA	NA	NA	NA	NA	NA	NA	NA	NA	NA	NA
class-specific genes	221319_at	PCDHB8	-0.022	0.468	-0.848	0.303	-0.452	0.765	-1.79	-1.628	1.053	0.483	0.288	-0.241	-1.113	0	-1.741	0.279	-0.813	-0.911	-1.186	-2.391	-1.323	-1.575	-0.818	0.185	-0.125	0.176	1.008	0.976	-0.109	-0.563	-1.01	-1.993	-1.097	-0.83	-1.569	0.319	-0.326	0.925	0.337	0.826	-2.491	0.239	-1.197	-0.248	-1.416	-0.27	0.306
class-specific genes	1552661_at	PCDHGB7	-1.425	-1.372	-1.372	0.898	0.337	0.959	-0.116	0.807	-0.469	0.066	-0.672	-1.871	0.17	-0.954	-2.274	1.364	-0.498	-0.673	-0.847	-1.162	0.554	0.178	-0.275	1.43	-0.877	0.558	-0.071	0.344	-1.013	0.114	0.11	0.649	0.165	0.474	0.6	-0.627	-0.715	0.899	0.926	-0.462	-0.811	0.803	-1.012	-0.179	0.416	0.914	-0.848
class-specific genes	229759_s_at	VEPH1	-1.656	-0.774	-0.63	-0.589	0.134	-0.377	-0.774	-0.816	-0.445	0.556	1.172	-1.423	-1.439	-0.734	0.907	1.183	-1.407	-1.381	0.624	1.053	1.476	0.244	0.413	0.595	0.636	-1.053	1.041	0.783	-0.573	-0.878	-1.946	-1.256	-1.335	1.219	-2.173	-1.946	-1.317	0.714	0.178	0.196	-1.149	0.887	0.747	0.72	0.799	0.149	-0.675
class-specific genes	206615_s_at	ADAM22	-0.372	-2.63	0.514	-0.167	0.963	-0.668	-0.698	-0.552	-2.405	-0.531	-0.075	0.259	-2.422	-0.812	-0.549	-0.604	-2.119	-2.469	-1.367	-0.132	-0.767	-0.434	-1.654	1.181	-0.002	-1.887	-1.77	-0.672	-0.141	-0.563	-1.873	-1.966	0.724	0.018	0.544	0.037	0.578	1.504	0.304	-2.466	-1.32	-2.763	-0.09	-0.078	-0.01	-1.428	0.609
class-specific genes	206252_s_at	AVPR1A	-0.075	-1.331	-1.524	0.16	-0.991	-0.241	0.72	-1.413	-1.778	-1.607	-0.395	0.097	-0.847	-0.215	-2.439	-1.349	-0.578	-0.23	-0.699	-2.82	-1.168	-1.825	0.434	0.797	0.031	1.086	-0.274	-0.355	-0.687	-0.058	-0.308	0.954	0.313	0.43	-0.937	-1.78	0.918	0.307	0.117	-1.893	-0.914	-1.138	-0.128	-1.375	-0.165	-1.212	0.791
class-specific genes	222071_s_at	SLCO4C1	-0.09	-0.228	-0.919	0.275	1.275	0.558	0.607	-0.386	0.687	0.409	0.036	-1.255	-0.317	0.535	-0.945	-0.566	-0.862	-3.439	-0.124	-0.201	-0.671	0.309	-0.68	-0.085	0.16	0.739	0.474	0.174	0.035	0.716	-0.467	-0.826	0.45	-0.42	-0.066	0.277	0.211	0.428	0.172	-2.723	1.882	0.396	0.159	-0.387	-3.847	0.251	0.709
class-specific genes	xxx	NA	NA	NA	NA	NA	NA	NA	NA	NA	NA	NA	NA	NA	NA	NA	NA	NA	NA	NA	NA	NA	NA	NA	NA	NA	NA	NA	NA	NA	NA	NA	NA	NA	NA	NA	NA	NA	NA	NA	NA	NA	NA	NA	NA	NA	NA	NA	NA
class-specific genes	xxx	NA	NA	NA	NA	NA	NA	NA	NA	NA	NA	NA	NA	NA	NA	NA	NA	NA	NA	NA	NA	NA	NA	NA	NA	NA	NA	NA	NA	NA	NA	NA	NA	NA	NA	NA	NA	NA	NA	NA	NA	NA	NA	NA	NA	NA	NA	NA	NA
class-specific genes	207505_at	PRKG2	-1.899	0.743	-0.24	0.27	0.293	0.154	-3.082	-0.743	0.752	-0.092	-0.122	-0.919	-0.836	-0.736	-2.278	-0.383	-1.421	-0.451	-1.871	-0.367	-0.198	-0.506	-0.093	-0.334	0.027	0.155	-0.414	-0.329	-1.945	-1.32	-0.456	-0.658	0.14	0.217	0.022	0.054	0.82	1.303	-0.15	-1.37	-1.051	1.482	1.231	-1.019	0.753	-1.637	1.077
class-specific genes	229376_at	PROX1	0.09	-0.103	0.208	-0.548	-2.839	-1.827	-1.152	0.609	-2.491	-0.881	0.499	-1.24	-1.292	-0.385	0.332	0.031	-0.846	-0.515	-0.61	-0.451	-2.544	0.078	0.335	-1.489	0.372	1.043	1.108	-1.759	0.325	-2.67	-0.551	-0.356	-0.134	-1.845	0.185	1.337	0.687	0.961	-0.341	-0.713	0.205	-2.261	-0.92	-1.786	2.333	1.271	0.431
class-specific genes	208504_x_at	PCDHB11	-1.242	-1.582	-0.736	-0.16	1.441	-0.699	-0.052	-1.471	0.361	-0.575	1.164	-1.858	-0.542	1.353	0.229	0.853	-1.189	-1.567	-1.453	0	-1.133	-1.42	-0.074	0.374	0.164	0.456	-0.012	2.461	0.393	-0.593	-0.792	-0.387	0.283	-0.333	-0.257	-0.66	-0.926	1.902	0.114	-0.583	0.042	0.522	1.101	-0.911	0.303	0.48	-0.157
class-specific genes	xx	NA	NA	NA	NA	NA	NA	NA	NA	NA	NA	NA	NA	NA	NA	NA	NA	NA	NA	NA	NA	NA	NA	NA	NA	NA	NA	NA	NA	NA	NA	NA	NA	NA	NA	NA	NA	NA	NA	NA	NA	NA	NA	NA	NA	NA	NA	NA	NA
class-specific genes	xx	NA	NA	NA	NA	NA	NA	NA	NA	NA	NA	NA	NA	NA	NA	NA	NA	NA	NA	NA	NA	NA	NA	NA	NA	NA	NA	NA	NA	NA	NA	NA	NA	NA	NA	NA	NA	NA	NA	NA	NA	NA	NA	NA	NA	NA	NA	NA	NA
class-specific genes	217678_at	SLC7A11	-0.152	0.691	-0.469	0.632	0.075	-0.957	-0.472	-0.585	0.281	-0.502	0.772	-0.779	-1.379	-1.472	0.09	0.955	-5.916	-1.405	-1.984	-1.101	-0.775	-0.168	-0.1	-0.028	-0.135	-0.276	-0.078	0.487	-0.56	-1.224	-1.322	0.776	0	-0.329	0.642	1.346	0.565	0.175	1.537	0.362	1.34	0.172	0.586	-0.451	1.382	2.476	0.427
class-specific genes	224542_s_at	NFATC2	-1.494	-0.134	0.368	-0.097	-0.52	1.822	-0.94	1.619	0.415	-0.862	0.114	-1.116	-0.754	1.537	-0.134	0.558	-1.276	0.199	-1.055	-0.115	-0.161	-0.45	1.278	0.292	-0.425	0.664	0.392	-0.028	-0.31	-1.215	-1.373	-1.072	-0.581	-0.933	1.961	-1.114	0.228	2.65	0.446	0.561	-0.225	-0.844	1.696	-1.076	-0.111	0.175	0.208
class-specific genes	1553427_at	ADAMTS15	-1.517	-0.371	-0.758	-0.7	0	-0.246	0.089	0	1.014	-0.161	0.577	-0.602	-1.022	0.752	1.067	1.495	-0.951	-0.856	0.557	-0.759	-0.856	0.168	-0.035	1.045	0.73	0.184	0.37	0.274	1.188	-0.944	-1.151	-0.828	1.835	2.199	0.229	-0.848	-0.195	0.399	0.28	-0.101	2.375	-0.35	0.756	0.013	0.309	-0.291	0.278
class-specific genes	223939_at	SUCNR1	-0.996	-0.792	-0.863	-0.244	0.09	-0.294	-0.166	-2.689	-0.327	-0.134	0.116	-2.09	-1.094	-1.42	-1.791	-0.157	-1.173	-3.658	-1.323	0.048	-1	-1.013	-0.213	-0.998	-1.021	0.537	-1.194	-0.531	-0.254	-0.895	0.17	0.133	-0.641	0.606	-0.611	-0.208	-0.389	0.069	-0.307	-0.847	0.939	-1.665	0.088	-4.842	-0.003	-3.122	-0.018
class-specific genes	214586_at	GPR37	0.453	-1.401	-0.987	-2.14	0.528	0.159	0.189	-0.146	0.278	-0.087	0.484	0.421	-0.635	0.323	-0.006	-0.633	-0.083	-0.049	-0.008	0.033	0.467	-0.431	0.607	0.484	0.026	0.795	-0.106	0.239	0.354	0.116	-2.148	-0.026	1.004	-2.733	0.885	0.408	-2.594	0.821	-0.713	-0.378	-2.071	-2.62	-2.162	-2.784	0.322	-0.065	0.374
class-specific genes	232271_at	HNF4G	0.686	1.215	0.429	-0.491	0.671	-0.318	0.051	0.529	0.263	-0.867	0.063	0.86	0.025	0.641	0.399	0.385	0.215	0.704	-2.082	-0.988	-0.662	-0.249	-0.447	0.832	-0.107	0.103	-0.459	0.795	-0.447	0.717	1.982	-0.597	1.67	-2.117	0.419	-1.868	-0.625	0.154	-0.075	-0.387	-0.067	-1.727	2.026	0.269	-0.031	0.289	0.878
class-specific genes	211873_s_at	PCDHGA9	-0.508	-1.09	-0.22	-0.168	0.131	-0.282	0	-0.094	1.037	-1.252	-0.734	-0.55	-1.137	-1.169	-0.347	-1.106	-1.708	-1.664	-1.621	-1.44	-0.399	0.161	-0.627	1.833	-0.436	0.686	-0.627	-0.945	-1.436	-2.393	0.996	-0.246	-0.718	0.833	-0.608	-0.236	-1.035	0.956	-0.543	-1.975	-0.832	0.451	0.069	1.542	-1.213	2.101	0.398
class-specific genes	1553235_at	PCDHAC1	-0.743	-0.356	-0.021	-0.844	3.11	0.762	0.037	-0.373	-0.34	0.259	1.914	-1.135	-1.135	-1.018	-1.066	1.112	-0.559	-0.325	-1.054	-1.247	-0.559	-0.09	-0.56	0.955	3.009	2.037	2.246	0.654	-0.339	0.831	-0.478	1.516	-0.252	-0.594	0.037	-0.604	0.016	0.337	0.021	-0.673	-0.497	-0.689	0.046	-1.505	-0.446	-0.357	1.214
class-specific genes	xxx	NA	NA	NA	NA	NA	NA	NA	NA	NA	NA	NA	NA	NA	NA	NA	NA	NA	NA	NA	NA	NA	NA	NA	NA	NA	NA	NA	NA	NA	NA	NA	NA	NA	NA	NA	NA	NA	NA	NA	NA	NA	NA	NA	NA	NA	NA	NA	NA
class-specific genes	xxx	NA	NA	NA	NA	NA	NA	NA	NA	NA	NA	NA	NA	NA	NA	NA	NA	NA	NA	NA	NA	NA	NA	NA	NA	NA	NA	NA	NA	NA	NA	NA	NA	NA	NA	NA	NA	NA	NA	NA	NA	NA	NA	NA	NA	NA	NA	NA	NA
class-specific genes	230603_at	COL27A1	-1.482	0.499	-0.186	-0.053	-1.166	-0.342	0.24	0.184	0.543	-1.126	0.719	-1.281	-1.428	-1.36	-2.448	1.503	-0.59	-1.755	-1.553	-0.786	-0.317	0.465	0.613	-1.291	-0.438	-0.363	-1.465	-1.201	-2.044	-0.102	0.25	-0.545	-0.997	0.884	-0.157	-1.803	0.085	-0.334	1.2	0.189	-0.13	0.895	-1.119	-0.081	0.891	-0.865	-1.065
class-specific genes	220825_s_at	KIRREL	-1.465	0.262	-0.744	0.345	0.867	1.854	1.846	0.699	-0.792	-1.328	-0.725	-0.049	-0.251	-1.465	-1.411	0.206	0.821	-1.621	-1.3	0.579	-0.767	-0.745	1.487	0.143	-0.278	-0.019	0.606	0.56	-1.327	-0.64	-0.587	-0.922	1.63	-1.052	-0.719	-0.958	-0.32	-0.461	-0.645	-0.059	-0.53	-1.32	0.341	0.491	1.128	-0.908	-1.097
class-specific genes	221682_s_at	PCDHGB6	-1.036	0.687	0.4	1.023	-0.374	1.178	0.759	-1.42	-0.78	-1.057	-0.958	0.613	0.526	0.53	-1.939	0.221	-0.786	-1.858	-1.098	-0.007	0.949	-0.854	0.382	1.503	0.256	0.156	0.328	-0.491	-0.816	0.084	-0.368	1.191	-0.947	0.206	1.162	0.388	-0.493	1.896	1.171	-0.519	0.742	1.237	-1.148	0.404	-0.308	0.933	0.459
class-specific genes	206470_at	PLXNC1	-0.5	-2.12	0.328	-0.157	-1.209	-0.084	0.392	-1.384	-1.223	-2.903	0.026	-2.256	-0.991	-1.048	-0.581	-0.554	-2.78	-3.004	-3.043	0.412	-0.706	1.164	0.79	0.165	-0.019	-1.384	0.088	0.66	-1.883	-1.503	0.01	-1.251	-0.755	-0.678	0.427	0.254	-2.861	0.817	-0.609	-1.049	-0.61	-3.012	0.088	-0.818	1.508	0.185	0.36
class-specific genes	234967_at	IL6ST	-1.153	0.353	-0.912	-1.271	1.615	1.243	-0.934	-0.707	0.343	-0.21	0.206	0.03	0.43	-0.813	-1.613	-0.926	-1.31	-1.689	-1.244	0.773	-1.244	-1.503	1.841	0.612	-0.393	0.578	1.086	-1.354	-0.665	-2.003	-1.2	0.171	-0.423	-0.481	0.113	0.017	-0.258	0.12	0.736	-0.306	-0.832	1.599	0.435	1.089	-0.544	-1.028	-0.012
class-specific genes	211875_x_at	PCDHGA10	-0.718	-1.298	-0.586	-1.411	-0.975	-0.551	-0.741	-1.01	-0.594	-0.771	0.902	-1.508	-2.198	-2.009	0.034	1.601	-1.923	-1.933	-1.415	0.613	-0.338	-1.01	-0.869	-0.691	1.083	0.605	1.705	0.932	-0.957	-1.933	-1.077	-1.694	-0.716	0.248	0.753	-0.815	0.13	0.888	1.649	-0.447	0.679	-1.34	0.721	0.585	0.632	-1.035	-1.076
class-specific genes	xxx	NA	NA	NA	NA	NA	NA	NA	NA	NA	NA	NA	NA	NA	NA	NA	NA	NA	NA	NA	NA	NA	NA	NA	NA	NA	NA	NA	NA	NA	NA	NA	NA	NA	NA	NA	NA	NA	NA	NA	NA	NA	NA	NA	NA	NA	NA	NA	NA
class-specific genes	xxx	NA	NA	NA	NA	NA	NA	NA	NA	NA	NA	NA	NA	NA	NA	NA	NA	NA	NA	NA	NA	NA	NA	NA	NA	NA	NA	NA	NA	NA	NA	NA	NA	NA	NA	NA	NA	NA	NA	NA	NA	NA	NA	NA	NA	NA	NA	NA	NA
class-specific genes	220340_at	KIAA1772	-1.421	-1.561	0.533	-0.079	0.751	-0.239	-0.262	-2.046	0.74	-0.755	0.596	-0.875	-0.293	0.833	0.569	-0.314	0.314	1.404	0.215	-0.774	-1.477	0.748	0.595	0.795	1.136	1.116	0.611	-2.688	-1.186	-2.276	-0.287	0.323	-1.366	0.249	1.495	-0.494	0.146	-1.122	-0.75	-0.53	0.939	-0.393	0.388	-0.739	0.934	0.423	0.312
class-specific genes	211807_x_at	PCDHGB5	-0.961	0.058	-0.055	-0.778	0.199	-0.106	0.481	-0.028	-0.013	-0.81	-0.25	-1.249	-0.965	-2.806	-0.89	-0.335	-1.212	-2.263	-0.805	-0.262	-0.527	-0.114	-0.378	0.76	-0.045	0.009	0.475	0.517	-0.302	-2.038	-0.28	-0.219	0.612	0.808	-0.152	-0.354	-0.32	-3.041	0.826	-1.378	-0.338	-0.098	-0.781	0.057	-0.701	-1.239	0.877
class-specific genes	206389_s_at	PDE3A	-0.279	0.524	0.698	0.398	0.372	-0.212	-0.609	0.322	0.694	-0.494	-1.025	0.201	-0.993	-1.883	-0.423	-0.364	-0.813	-0.086	-2.263	-0.243	-1.128	-1.391	-2.87	-1.121	0.23	-0.452	-1.717	-0.307	-0.695	-0.888	-2.116	-0.417	0.323	-0.057	-0.419	0.288	0.059	0.784	1.23	-1.673	-0.164	0.384	-0.299	-0.602	0.859	-0.403	0.134
class-specific genes	215704_at	FLG	-0.703	-2.404	0.096	0.002	1.267	0.496	-1.868	-0.609	0.181	-0.31	0.222	-3.842	-0.453	-0.409	-0.245	0.682	-0.641	-0.503	-0.165	-0.766	-0.875	-0.005	-0.237	1.102	0.67	1.257	0.696	-1.738	-0.038	-0.44	-0.674	0.353	-1.434	-0.449	-0.155	-0.995	0.372	-1.585	-0.058	-1.046	0.145	0.288	-2.348	0.074	-0.146	-0.671	1.634
class-specific genes	207050_at	CACNA2D1	-0.673	-0.723	0.148	-0.02	0.855	0.286	-0.141	-2.104	-1.986	-0.381	0.14	-1.956	-0.658	-2.363	-2.437	-1.898	0.003	-1.774	-1.624	-0.587	0.221	0.498	-1.344	-1.122	-1.106	-2.254	0.399	-1.844	-0.117	-0.825	-1.136	0.197	0.051	-0.495	1.09	0.613	-0.946	0.837	-0.933	-1.954	-0.997	0.896	0.248	-0.559	-2.832	0.071	-1.719
class-specific genes	xxx	NA	NA	NA	NA	NA	NA	NA	NA	NA	NA	NA	NA	NA	NA	NA	NA	NA	NA	NA	NA	NA	NA	NA	NA	NA	NA	NA	NA	NA	NA	NA	NA	NA	NA	NA	NA	NA	NA	NA	NA	NA	NA	NA	NA	NA	NA	NA	NA
class-specific genes	xxx	NA	NA	NA	NA	NA	NA	NA	NA	NA	NA	NA	NA	NA	NA	NA	NA	NA	NA	NA	NA	NA	NA	NA	NA	NA	NA	NA	NA	NA	NA	NA	NA	NA	NA	NA	NA	NA	NA	NA	NA	NA	NA	NA	NA	NA	NA	NA	NA
class-specific genes	1553986_at	RASEF	0.007	0.174	-0.118	0.986	0.082	0.262	-0.027	-0.208	0.108	0.781	0.915	-0.652	0.483	-0.299	-0.874	0.567	0.371	0.45	0.327	-0.12	-0.634	0.944	0.314	0.683	-0.556	0.584	0.367	1.356	-1.653	0.094	1.651	-1.31	1.266	-2.431	0.37	-2.682	-0.593	0.518	0.676	0.205	-1.61	-0.293	0.424	0.786	-1.176	-0.286	0.747
class-specific genes	225275_at	EDIL3	-0.346	-0.082	-0.344	0.649	-3.011	0.283	0.221	-0.127	0.746	-0.394	-0.971	0.533	0.235	0.252	0.089	-1.135	0.548	-1.435	-0.741	0.499	-0.231	-1.883	-1.159	-0.296	-1.157	-0.446	1.334	1.392	1.464	-0.289	-0.134	-1.006	0.117	-1.565	-0.886	-1.116	0.179	-0.4	2.817	-1.178	-0.782	2.163	-0.363	-0.6	-0.404	0.837	-0.205
class-specific genes	xxx	NA	NA	NA	NA	NA	NA	NA	NA	NA	NA	NA	NA	NA	NA	NA	NA	NA	NA	NA	NA	NA	NA	NA	NA	NA	NA	NA	NA	NA	NA	NA	NA	NA	NA	NA	NA	NA	NA	NA	NA	NA	NA	NA	NA	NA	NA	NA	NA
class-specific genes	236700_at	EIF3C	-0.239	-1.149	0.062	-1.147	-1.376	0.786	-0.717	0.646	-0.981	-0.441	0.166	-0.799	-1.461	-0.749	-0.284	1.875	0.427	-1.313	-1.676	-0.068	-1.312	0.719	0.249	0.423	-0.388	0.235	0.357	0.383	-0.766	0.391	-2.528	0.967	-1.464	-0.5	0.412	1.292	1.293	1.024	0.283	0.397	-0.048	-0.301	0	-0.593	0.236	-1.386	0.278
class-specific genes	206859_s_at	PAEP	-1.19	-0.306	1.169	-1.097	0.913	-1.029	-0.464	-0.057	0.311	-1.229	1.832	0.295	-1.383	-0.429	-1.029	1.861	-1.777	-0.727	-1.811	0.039	1.228	0.116	4.931	0.07	0.798	0.737	-0.236	-0.514	-0.236	-1.713	-0.726	1.174	-0.198	1.315	-0.086	1.108	0.673	-0.258	1.774	0.198	-0.313	2.487	1.73	0.554	1.405	-0.754	0.439
class-specific genes	205374_at	SLN	-0.451	0.134	0.51	-0.244	0.603	-0.816	0.134	-0.318	-3.374	0.186	-0.035	-1.153	-1.756	-0.316	0.018	-0.12	-0.862	1.618	-3.362	0.065	-0.405	0.711	1.242	2.127	0.155	-1.292	1.057	0.08	0.178	-1.693	-0.676	-0.298	-2.317	-0.11	0.244	-1.001	-1.645	-0.632	0.747	-1.532	-0.274	0.468	-0.437	-0.365	-0.982	0.032	0.144
class-specific genes	205302_at	IGFBP1	-1.733	-1.618	-0.407	0.281	-0.785	0.386	1.062	-0.306	0.403	-0.7	-0.554	-0.45	-0.73	-0.315	-0.567	0.928	-1.129	-1.668	-1.782	-1.465	-0.939	-0.336	2.453	-0.491	0.398	0.605	1.894	-0.08	-0.275	-0.524	-0.078	-0.159	-0.323	-0.434	0.192	1.405	-0.043	-1.65	0.235	-0.287	0.324	-0.855	0.728	0.382	-0.866	-1.482	0.749
class-specific genes	207634_at	PDCD1	-0.212	1.308	-0.866	1.144	0.909	1.056	0.622	0.031	1.397	0.842	1.628	0.176	-1.188	-0.32	-1.554	-0.408	-2.364	-1.869	-0.415	-0.541	-0.499	0.225	-0.039	2.133	0.583	0.659	-0.351	-0.284	-1.621	-1.591	0.92	-1.153	1.313	-0.57	1.065	0.328	-1.299	0.497	-0.599	-0.103	-0.606	0.62	-0.267	-0.767	-0.079	-1.359	-0.262
class-specific genes	206398_s_at	CD19	-0.915	0.749	-2.024	-1.681	0.528	0.257	-1.327	0.08	0.032	0.282	0.335	-0.425	0.208	0.287	-0.187	-0.362	-0.263	-0.267	0.042	-0.138	0.306	0.44	1.069	-0.905	0.867	0.154	-0.581	0.778	-1.371	-1.117	0.137	0.284	0.415	0.777	0.323	-0.566	0.641	-0.993	-0.029	-0.855	0	1.047	-0.453	-0.871	-2.112	0.384	0.127
class-specific genes	205456_at	CD3E	-0.412	0.298	0.051	0.056	0.274	0.202	0.396	-1.164	0.233	-0.317	-1.343	-0.218	-0.046	-0.657	-0.557	-1.132	-1.328	-1.001	-2.175	0.09	-1.199	-1.012	-0.175	0.903	-3.725	0.361	0.938	-1.351	0.201	-1.065	-0.095	-0.197	0.357	0.177	-0.834	-0.237	-0.036	-1.113	-0.197	-1.491	0.461	-2.203	0.974	-0.908	-3.933	0.244	-0.335
class-specific genes	206337_at	CCR7	-0.657	0.048	-0.353	0.528	0.68	0.382	-0.427	-0.84	-0.344	-0.868	-0.091	-0.712	-0.376	-0.15	-1.279	0.04	-1.367	-0.486	-0.032	-1.031	-0.923	-0.141	-0.103	0.363	0.284	0.664	-0.806	-0.717	-0.185	-1.35	0.166	-0.785	0.535	-0.253	0.116	0.513	0.022	1.052	0.8	-0.497	-0.756	0.042	0.313	-0.985	0.598	-0.152	0.955
class-specific genes	1552280_at	TIMD4	-0.088	-1.529	-0.876	0.826	0.611	-0.068	0.047	0.144	1.104	0.047	0.57	0.262	-0.212	-3.304	-1.058	-0.007	-2.242	-0.652	0.242	-0.337	-0.523	0.31	-0.542	0.475	-0.22	1.515	-2.012	-0.011	-0.849	-1.227	-2.137	-0.673	-1.117	0.001	-0.013	0.541	-0.795	-1.428	0.652	-0.092	0.086	1.385	-0.084	-0.417	-0.544	0.153	0.63
class-specific genes	205758_at	CD8A	-1.472	-0.092	0.007	-0.256	1.693	-0.146	0.532	-1.918	0.745	-0.096	0.131	-0.036	-0.299	0.024	-0.858	0.379	0	-0.008	-2.074	-0.059	-0.812	-0.494	0.14	-0.541	-0.217	0.877	0.971	-0.189	0.242	0.341	-2.097	-0.327	-1.092	0.483	-1.027	-1.733	0.313	-1.271	0.379	-0.644	0.39	-1.063	0.887	0.04	-1.033	-0.183	0.691
class-specific genes	210662_at	KYNU	-0.969	-0.958	-0.31	-2.519	0.147	0.194	-0.389	-1.759	0.602	0.249	1.079	-1.733	-0.284	0.336	-0.445	-0.432	0.295	-2.25	-1.216	0.05	0.032	-0.944	0.318	0.834	-0.587	-0.494	-0.233	-2.179	-0.581	-0.412	-0.047	-0.494	0.766	0.483	-0.016	-1.843	-1.314	-1.721	0.752	-0.633	-1.12	0.445	-1.545	-2.059	0.711	0.67	0.751
class-specific genes	205488_at	GZMA	-0.5	0.186	0.282	0.512	2.04	-0.342	1.368	-0.931	0.723	0.693	0.744	-0.019	-0.33	-0.399	-0.797	-0.513	0.175	-0.122	-0.58	-0.1	-1.184	-1.066	0.016	0.761	-0.139	0.112	0.336	-1.117	0.102	-0.281	1.282	-0.438	0.01	0.063	0.067	-0.073	-0.08	0.046	0.085	-0.688	0.25	-1.009	0.634	-0.819	0.739	0.028	0.478
class-specific genes	205476_at	CCL20	0.858	-0.183	0.222	1.041	-0.407	0.034	-0.054	-0.179	-0.143	0.567	0.174	0.742	0.52	0.08	0.417	-0.204	-0.569	0.113	-0.613	1.034	1.393	-0.753	1.377	-0.291	-0.293	-0.632	-0.228	-0.512	-0.034	0.183	1.692	0.765	0.817	-0.503	1.44	1.692	-1.376	0.594	-1.547	-1.529	-1.081	-1.062	-1.007	0.112	0.062	0.457	0.856
class-specific genes	206759_at	FCER2	-1.655	0.874	0.65	0.446	-0.777	0.649	0.625	0.727	0.804	-0.945	0.043	-0.286	0.23	-0.678	-0.615	-0.515	-1.212	-0.785	-0.948	-0.222	-1.13	-0.355	0.33	-0.1	1.656	0.554	-1.042	-0.221	1.561	-0.313	1.567	1.454	2.138	-1.088	-0.252	-0.648	0.842	-0.8	0.517	-0.272	1.036	0.365	0.917	-1.766	-0.258	-1.365	0.926
class-specific genes	231776_at	EOMES	-0.324	-0.769	-0.101	0.235	2.53	-0.248	0.603	-1.004	-1.406	-0.544	-0.675	-1.31	-0.086	0.01	-1.712	-1.685	-0.635	-1.128	-0.842	-0.556	-2.296	-1.265	0.102	0.767	-0.131	0.622	0.108	-1.498	0.112	-0.227	-3.224	-0.442	0.071	0.021	0.192	0.016	0.435	-0.803	0.312	-2.168	-0.587	-0.961	0.466	0.116	0.387	-0.523	-0.529
class-specific genes	220423_at	PLA2G2D	-0.807	-0.433	-0.453	-0.108	1.048	-0.025	-0.148	-0.453	-0.172	-0.682	0.166	-0.861	-1.347	-1.428	-1.165	-0.314	-0.814	-1.28	-0.857	-1.047	-0.733	0.026	-0.219	1.079	-0.334	1.151	-0.049	0.571	-1.028	-1.795	-0.682	-0.379	0.014	0.074	-0.342	-0.178	0.118	-0.228	0.021	-1.411	0.003	0.259	0.718	-0.753	-0.007	0.067	0.007
class-specific genes	228592_at	MS4A1	0.085	-0.142	-0.193	-0.699	0.21	0.195	-0.654	-0.23	-0.541	0.313	0.329	-0.064	0.017	1.074	-0.713	-0.255	-1.172	-0.994	-0.311	-0.211	-1.553	-0.821	-0.061	-0.16	-0.352	0.318	-1.629	-2.135	-0.272	-1.447	-0.061	-0.416	0.323	0.244	-0.941	-0.128	0.173	0.832	0.822	-1.141	-0.211	-0.888	0.424	-0.052	-0.29	0.028	0.737
class-specific genes	215332_s_at	CD8B	-2.088	-1.434	-0.433	0.108	1.436	-0.404	-1.613	-2.008	0.996	-1.193	-2.431	-0.935	0.363	-0.257	-2.097	-1.761	-0.816	0.097	-0.849	-1.084	-2.287	-2.295	-0.082	0.473	0.245	0.989	0.773	-0.484	-0.324	-0.239	-2.393	-0.82	-0.356	-0.906	-0.377	0.369	0.268	1.032	-1.834	-0.992	0.357	0.129	0.435	-1.483	0.664	-0.657	-1.599
class-specific genes	207096_at	SAA4	-0.713	-0.328	0.301	-0.596	1.297	0.466	-0.007	-0.78	-0.649	-1.098	-0.646	-1.166	-0.376	-2.907	-1.43	-0.727	-0.744	-1.588	-0.767	-1.105	0.136	0.426	1.595	0.57	-0.406	0.089	1.078	-1.187	-0.195	-2.581	-0.266	0.267	0.132	0.43	-0.132	0.031	-0.272	-0.205	-0.011	-0.613	-1.163	-0.232	0.596	-0.563	-0.596	-0.225	2.871
class-specific genes	205844_at	VNN1	-0.712	-0.615	-0.818	-0.273	1.259	-0.29	2.356	-0.168	1.179	-0.693	-0.966	1.033	0.578	-0.147	0.491	-1.685	-1.466	-1.109	0.273	-0.509	0.049	-0.428	-0.015	-0.257	-0.296	0.358	0.827	2.022	-0.35	-0.211	2.72	0	1.918	-0.561	1.623	0.061	0.133	0.045	-0.815	-0.258	-2.062	-0.321	1.555	-0.529	0.387	0.791	0.483
class-specific genes	205242_at	CXCL13	-0.237	0.355	-0.595	0.004	1.141	0.051	0.203	-0.477	-2.236	-0.055	0.312	-0.38	-2.301	0.085	-0.626	0.169	1.579	-0.543	-1.309	0.526	-1.03	-0.714	0.514	0.79	-0.597	-1.162	0.144	-1.14	-1.414	-0.651	-1.235	-1.894	-0.725	0.62	-1.099	-0.107	-0.14	-1.383	0.65	-0.711	0.024	-0.554	0.81	-0.094	0.561	-0.043	0
class-specific genes	227342_s_at	MYEOV	-0.514	-0.652	0.992	0.841	0.745	-0.264	0.003	0.975	0.083	-0.129	0.583	0.083	0.716	0.019	-0.003	0.931	-0.567	-0.366	-0.103	0.942	-0.219	-0.491	1.105	0.063	-0.703	-1.484	-1.288	-1.156	0.22	-0.727	2.565	-0.189	1.264	-0.405	2.065	0.496	-0.03	0	-0.485	-0.838	-0.511	1.039	1.182	-0.541	-0.287	0.331	1.584
class-specific genes	224404_s_at	FCRL5	-0.456	0.472	-0.217	-0.521	-0.021	0.491	0.108	-0.47	0.054	0.524	1.076	0.299	0.254	0.601	0.026	-0.262	-1.853	-0.686	0.303	-0.039	-1.845	-0.964	0.209	-0.002	0.503	1.388	0.358	0.411	-0.147	-2.27	-1.109	-0.681	-0.445	0.579	-0.584	0.485	0.727	0.119	-0.26	0.085	0.828	-1.366	-0.762	0.442	-1.083	0.281	0.114
class-specific genes	238600_at	JAKMIP1	-0.313	0.157	-0.002	0.252	1.525	-0.462	0.932	-1.497	-0.803	0.176	0.877	-0.609	-0.032	-0.386	-1.796	0.213	-1.746	-1.823	0.277	0.44	-2.594	-1.432	0.052	0.899	-0.692	-1.011	-0.333	0.363	-0.013	-0.321	-0.615	-0.023	-0.515	0.494	0.142	-1.251	0.071	-1.393	-0.564	-2.779	-1.36	0.792	0.269	-0.846	0.721	2.118	-1.131
class-specific genes	220068_at	VPREB3	-0.326	0.062	-1.315	-1.182	0.856	-0.148	-0.092	-0.46	-1.016	-0.187	0.698	-0.201	0.177	0.971	-0.869	-0.064	-1.084	-0.08	-0.172	-2.758	-1.756	-0.079	-0.492	-0.802	0.874	0.396	0.796	0.452	-1.082	-2.05	-0.426	0.217	0.649	0.472	0.347	-0.785	0.153	-1.107	0.138	0.129	0.709	0.863	-0.175	0.022	0.325	-0.469	-0.981
class-specific genes	221239_s_at	FCRL2	0.001	-1.8	0.412	-1.47	-1.598	-0.567	0.445	-0.915	-0.234	0.373	0.881	-1.719	0.265	0.172	-2.305	-0.642	-0.064	-1.345	-0.088	-1.527	-2.195	-1.705	0.606	0.25	1.028	1.322	0.139	-1.489	0.296	-1.778	-0.966	0.257	0.433	-0.892	-0.956	-1.863	-0.289	-0.595	-0.481	-0.265	-0.048	0.119	-1.828	-0.413	0.466	0.472	0.034
class-specific genes	238581_at	GBP5	-0.604	0.266	-1.574	-0.04	0.853	-0.934	0.361	-0.375	0.187	-0.172	0.647	-0.375	-0.507	0.444	-1.346	-0.295	-0.147	0.163	-0.02	-0.179	-0.496	-1.891	0.094	0.206	0.195	-0.21	0.003	-0.151	-0.035	-0.463	-3.331	-2.194	-0.143	0.732	-0.373	0.973	0.405	0.49	0.656	0.779	0.581	-0.928	0.583	-0.056	0.353	0.094	0
class-specific genes	xxx	NA	NA	NA	NA	NA	NA	NA	NA	NA	NA	NA	NA	NA	NA	NA	NA	NA	NA	NA	NA	NA	NA	NA	NA	NA	NA	NA	NA	NA	NA	NA	NA	NA	NA	NA	NA	NA	NA	NA	NA	NA	NA	NA	NA	NA	NA	NA	NA
class-specific genes	205922_at	VNN2	-1.14	-2.148	-1.73	-0.177	0.536	-0.31	-0.446	-2.21	-0.241	-0.026	-1.107	-1.291	-0.759	-1.869	-0.228	-1.79	-1.999	0.203	-2.12	0.162	0.934	-0.613	0.366	0.197	-0.044	0.234	0.344	0.281	0.155	-0.676	2.569	-0.712	0.934	-1.471	-0.587	0.795	-1.572	-0.315	-1.209	-0.436	-0.929	-2.224	0.76	0.187	-1.062	-0.798	0.791
class-specific genes	228648_at	LRG1	0.486	-0.88	0.35	0.512	1.294	0.144	0.384	-0.544	0.758	-0.448	0.589	-0.082	0.634	-0.432	-0.17	0.831	1.813	-0.23	0.763	-0.407	0.599	0.1	2.198	0.49	0.987	0.703	1.436	0.341	0.475	-0.759	0.781	-0.897	0.433	-0.517	1.263	0.062	0.293	0.75	-0.377	-1.143	0.92	-0.046	0.446	-0.18	0.37	0.516	1.247
class-specific genes	238439_at	ANKRD22	0.872	1.108	0.426	-0.994	0.741	0.776	-0.371	-0.491	0.056	1.277	-0.61	0.374	0.771	-0.022	0.094	0.224	-0.936	-0.144	-1.47	0.027	0.502	-0.668	0	-0.014	0.512	0.163	0.065	-1.288	-0.075	-1.02	1.656	-1.251	1.92	-0.719	1.202	0.547	-0.561	-0.04	-0.938	-1.431	0.183	-0.963	0.265	0.178	0.616	0.124	0.892
class-specific genes	xxx	NA	NA	NA	NA	NA	NA	NA	NA	NA	NA	NA	NA	NA	NA	NA	NA	NA	NA	NA	NA	NA	NA	NA	NA	NA	NA	NA	NA	NA	NA	NA	NA	NA	NA	NA	NA	NA	NA	NA	NA	NA	NA	NA	NA	NA	NA	NA	NA
class-specific genes	206134_at	ADAMDEC1	0.294	0.861	0.377	-0.769	-0.04	0.779	0.929	-0.524	1.238	0.555	-0.677	0.838	0.68	0.123	0.561	-0.76	-0.885	0.788	-0.17	-0.975	0.813	-0.097	0.616	-0.481	0.487	0.582	0.786	1.64	-0.281	-1.301	-0.635	-1.082	-0.583	0.774	-1.054	-0.352	0.067	0.364	1.177	0.282	0.552	-0.139	0.571	-0.219	-0.486	0.436	0.945
class-specific genes	207641_at	TNFRSF13B	-0.608	0.15	0.042	-0.015	-0.599	0.194	-0.935	-0.331	0.14	0.31	-2.086	-1.518	-1.819	-0.353	-1.753	-0.701	-0.825	-0.38	-0.038	-0.804	-1.164	0.221	0.524	0.053	0.14	1.027	0.856	-0.187	-0.59	-1.846	-1.335	-0.409	0.736	0.597	-0.384	0.002	0.962	-0.257	0.346	-0.586	0.461	0.17	-0.035	-1.077	1.119	0.668	0.405
class-specific genes	223565_at	MGC29506	0.19	0.526	0.186	-0.593	0.471	0.687	-0.118	-0.135	-0.478	0.718	0.729	0.815	0.938	0.704	0.208	0.26	-0.522	0.735	0.249	0.194	0.753	0.1	0.833	1.045	-1.074	-0.39	0.677	0.436	-0.908	-0.912	-0.869	-0.543	-0.585	-0.053	-1.01	0.497	0.686	-1.063	1.436	0.882	0.619	-0.26	-1.39	0.767	-0.392	1.272	-0.893
class-specific genes	219667_s_at	BANK1	-0.416	-1.015	-0.986	-0.393	0.104	0.107	-1.897	-1.258	-1.387	-0.142	-0.265	-0.291	-0.559	0.035	0.563	0.311	-0.714	-1.212	-0.971	-0.975	0.143	-0.817	-0.117	-0.001	0.341	0.388	-0.094	-1.182	1.02	0.157	-0.659	-1.6	0.649	-2.206	0.672	-0.773	0.532	0.981	-0.831	-1.187	-0.086	-0.899	-0.235	0.288	0	-0.169	0.133
class-specific genes	223952_x_at	DHRS9	0.193	1.673	1.322	-0.108	-0.804	1.446	1.057	1.151	0	0.931	0.243	0.79	1.421	0.529	0.994	0.056	-0.792	-0.634	0.037	-1.498	-0.33	1.155	-1.156	-1.692	0.307	-0.718	0.387	1.222	-0.149	1.182	2.484	-0.573	1.09	-0.13	2.108	-0.349	0.509	-0.012	0.218	-1.314	1.548	-1.907	0.62	-1.788	0.25	-0.339	2.055
class-specific genes	209995_s_at	TCL1A	-0.032	-0.837	0.042	-1.116	0.994	-0.315	0.721	-1.685	-0.819	-1.052	0.245	-2.605	-0.464	-0.5	-1.773	0.265	-1.928	-2.365	-1.247	-1.905	-1.622	0.682	-0.698	0.452	-0.839	-0.201	-0.907	-1.167	-0.164	-1.156	-0.631	1.246	-0.475	1.124	1.073	-0.776	-1.181	1.611	-0.696	-1.897	-1.451	0.509	-1.226	-1.44	-1.164	0.559	-1.215
class-specific genes	205901_at	PNOC	-0.491	0.591	-0.005	-0.95	0.593	0.25	-0.124	-1.579	0.497	0.29	0.661	-0.003	0.072	0.493	-0.316	-0.047	0.344	-0.391	-2.371	-0.483	-0.78	-0.444	-1.159	0.436	-1.372	0.96	0.135	-0.911	0.04	-0.518	-0.761	1.107	-0.623	0.127	-1.711	-0.32	-0.046	-0.59	-0.285	1.132	0.699	-1.845	-0.308	-0.159	0.573	0.379	-1.654
class-specific genes	203915_at	CXCL9	-0.441	0.788	-0.499	1.114	1.027	-0.384	0.762	-0.929	-0.281	0.943	-0.985	-0.612	-1.415	0.793	-0.562	-0.476	0.218	0.148	-0.235	0.22	-1.273	-0.882	0.296	0.674	-0.057	0.238	0	-0.495	0.375	0.482	-0.712	-0.494	-0.292	0.88	-0.195	-0.075	0.329	-0.047	0.398	0.235	0.441	-0.731	1.333	0	0.853	-0.072	-0.317
class-specific genes	208450_at	LGALS2	0.185	-0.334	0.407	1.266	1.65	1.13	1.6	0.901	1.263	0.264	0.166	1.63	0.953	-0.796	1.093	0.723	-1.181	-0.046	-1.303	-1.391	-0.472	0.205	0.318	0.424	0.452	0.46	-0.281	-0.573	-0.241	0.703	2.927	-1.027	1.612	0.775	-0.87	-0.812	0.351	1.03	0.476	-1.154	-0.972	-0.746	-0.72	1.067	0.735	-0.051	1.837
class-specific genes	210321_at	GZMH	-2.19	0.738	-1.065	1.018	2.589	-1.024	0.783	-0.014	-0.564	0.806	0.387	-0.322	0.272	0.869	-0.416	0.235	0.248	-0.014	-0.806	-0.133	-1.707	-1.942	-0.438	0.604	-0.325	0.952	0.295	0.121	0.517	-0.054	-0.69	-0.765	0.097	0.118	-0.481	-1.21	-0.621	0.822	1.013	-1.502	0.557	-1.094	1.02	0.251	0.752	-0.126	-0.656
class-specific genes	229152_at	C4orf7	0.36	-0.055	-0.324	-0.458	0.642	0.29	-0.272	-0.384	-0.076	-0.952	0.448	0.275	-0.456	1.189	-0.111	-0.288	-1.772	-0.665	-0.29	-1.827	-2.315	0.536	4.032	-0.139	0.286	-0.128	-0.532	0.801	0.456	0.265	-0.991	0.546	-0.47	-0.949	-0.17	0.494	0.263	0.218	0.708	-1.558	0	0.452	0.401	-1.539	0.699	-0.564	0.382
class-specific genes	205692_s_at	CD38	-0.734	0.001	0.665	-0.125	1.157	0.725	0.39	-0.107	0.172	0.772	0.336	0.213	-0.058	0.205	-0.411	0.224	-1.171	0.938	-0.401	-0.281	-0.5	-2.272	0.743	0.706	-0.599	0.664	0.55	-0.228	-0.542	-0.611	-1.937	-0.015	-0.352	0.337	-0.145	0.124	0.253	-1.413	0.421	0.455	0.491	-0.686	1.663	-0.271	0.281	0.408	1.274
class-specific genes	212592_at	IGJ	0.353	1.036	0.731	-0.781	-0.488	0.96	0.615	0.166	0.137	0.698	0.315	0.679	0.565	0.397	0.606	0.333	-1.535	0.993	0.063	-0.512	-1.124	-0.926	1.229	0.645	0.106	0.668	1.68	0.661	-0.399	-0.205	0.413	-1.688	-0.185	0.512	-0.125	0.362	1.048	-1.086	1.344	1.181	-0.049	-0.856	0.217	0.543	0.483	1.444	0
class-specific genes	206804_at	CD3G	-0.483	-1.138	-1.405	0.344	1.08	-0.41	0.521	-0.435	-0.201	-0.331	0.232	0.315	-0.314	0.172	-1.025	-0.924	-0.681	-0.509	-1.173	-0.375	-2.482	-2.213	-0.813	0.188	-1.69	-1.388	-0.472	-1.807	-0.457	-0.316	0.22	-1.12	0.611	-0.499	-0.748	0.523	0.913	-0.258	-1.536	-0.248	0.154	0.318	0.136	-0.628	0.77	-1.66	0.441
class-specific genes	215444_s_at	TRIM31	0.934	0.332	-0.036	1.104	-0.397	0.555	0.689	0.723	-0.003	1.395	1.079	0.505	0.193	0.419	1.004	-0.469	-0.932	-1.102	-1.079	-0.874	0.274	-0.396	-0.318	2.396	1.431	1.933	-0.228	0.241	-1.17	-1.075	2.754	-0.553	1.667	0.122	-0.086	-0.183	-0.684	-0.802	-0.048	-0.906	-0.063	0.277	1.712	-0.316	0.935	-0.198	2.278
class-specific genes	xxx	NA	NA	NA	NA	NA	NA	NA	NA	NA	NA	NA	NA	NA	NA	NA	NA	NA	NA	NA	NA	NA	NA	NA	NA	NA	NA	NA	NA	NA	NA	NA	NA	NA	NA	NA	NA	NA	NA	NA	NA	NA	NA	NA	NA	NA	NA	NA	NA
class-specific genes	242020_s_at	ZBP1	0.248	0.356	0.851	-1.493	-1.909	1.694	1.308	-0.579	-0.675	-0.524	-0.786	0.654	0.438	0.704	0.98	1.668	-1.379	1.357	0.258	0.415	0.806	-1.122	0.506	1.053	1.333	0.519	0.707	0.3	-1.361	-1.14	0.831	0.994	-0.121	1.207	-0.873	-0.633	-0.405	-0.255	1.735	1.855	0.502	-0.715	1.512	-0.485	1.92	0	-0.579
class-specific genes	220485_s_at	SIRPG	-1.228	-0.41	-0.715	0.121	1.598	-0.744	0.32	-0.964	0.602	-0.168	-2.453	-0.752	-0.329	-1.384	-2.107	-1.039	-0.494	-0.648	-2.249	0.027	-0.301	-0.061	0.775	-0.847	-0.904	-1.403	-0.953	-0.259	-0.323	-0.15	-0.181	0.07	-1.005	0.565	-0.122	0.911	-2.032	0.972	-0.285	-0.925	-0.535	-0.803	0.057	-1.648	-0.052	0.213	0.208
class-specific genes	206802_at	PAX5	-1.153	-0.871	-0.362	-0.325	-0.466	0.923	-0.861	-1.074	-0.64	-1.535	-1.357	-1.118	-1.782	-0.988	1.23	-0.945	-1.852	1.46	-0.934	-0.85	-1.386	1.586	0.136	0.6	0.104	-0.189	-0.467	-1.181	-0.032	-2.005	-0.51	1.068	-0.163	-0.325	0.158	0.728	-0.711	-0.582	-0.488	-1.165	-0.552	-0.886	-0.707	0.516	-0.252	1.587	-0.687
class-specific genes	xxx	NA	NA	NA	NA	NA	NA	NA	NA	NA	NA	NA	NA	NA	NA	NA	NA	NA	NA	NA	NA	NA	NA	NA	NA	NA	NA	NA	NA	NA	NA	NA	NA	NA	NA	NA	NA	NA	NA	NA	NA	NA	NA	NA	NA	NA	NA	NA	NA
class-specific genes	231093_at	FCRL3	-1.173	-0.225	0.137	-0.008	0.874	-0.163	-1.064	-0.598	0.053	-0.467	0.342	-0.891	-0.55	0.033	-1.113	-0.547	-0.707	-1.207	-0.148	-0.515	-1.333	-0.435	-0.699	0.393	-0.08	1.067	-2.345	-0.358	0.142	0.123	-0.492	-0.396	0.345	0.584	-0.112	0.4	0.038	0.591	0.604	-1.536	0.487	-0.58	0.629	-0.068	0.684	-1.682	-0.609
class-specific genes	206988_at	CCL25	-0.705	0.442	-0.649	-0.139	-1.494	-0.823	-1.111	-1.106	1.614	-1.415	-0.876	0.406	0.413	0.285	-2.135	-1.237	0.214	-1.764	-1.711	-2.113	0.078	0.871	0.772	0.024	0.627	-0.819	-1.371	-0.381	-0.264	-2.126	-1.13	1.339	0.07	0.972	0.499	1.311	-2.14	-1.125	0.693	-0.105	-0.542	-0.715	-0.179	0.114	1.335	0.324	0.913
class-specific genes	214470_at	KLRB1	0.207	-0.056	-0.04	0.15	-0.055	-0.43	0.457	-0.531	0.856	0.468	-0.124	0.083	-0.31	0.002	-0.438	-0.2	-0.863	-1.03	-0.086	-0.578	-1.086	-1.338	0.432	0.228	0.564	-0.49	-0.585	0.673	0.338	-0.876	0.531	-0.744	0.533	-0.393	0.988	0.249	-0.015	0.452	0.606	-0.842	-0.112	-2.898	-0.024	-0.369	0.298	-0.233	0.523
class-specific genes	220812_s_at	HHLA2	0.944	0.572	0.6	0.378	-2.209	0.973	1.063	1.016	0.262	0.714	0.726	1.772	1.667	0.386	0.962	-0.908	-2.173	-1.644	-1.253	-0.296	-0.581	-1.011	-0.029	0.336	0.688	-0.787	-0.701	-0.288	-0.499	0.821	2.492	0.454	1.206	-1.323	-1.408	0.245	0.33	0.47	0.699	-1.666	-1.225	-0.647	0	0.12	-1.741	-0.815	1.014
class-specific genes	214432_at	ATP1A3	-0.213	-1.764	-0.554	-1.246	0.291	-0.138	-1.534	1.729	-0.617	-2.582	0.259	-0.248	-0.12	-0.534	0.263	1.011	0.095	0.38	0.92	0.1	0.321	-1.244	0.748	0.403	0.801	-0.668	1.202	-1.151	0.826	-0.376	-0.952	-2.561	0.2	-0.783	0.267	1.028	0.88	0.886	1.306	0.289	-0.513	-0.803	0.738	-0.941	-0.888	0.234	0.759
class-specific genes	237461_at	NLRP7	-0.64	0.513	0.203	0.407	0.707	-0.376	0.237	-1.22	0.037	0.528	0.791	0.146	0.092	0.84	-1.242	-0.73	-1.008	-0.003	0.163	0.275	-0.169	-0.758	-2.144	0.858	0.137	0.53	1.297	0.307	-1.07	-0.382	-0.318	0.27	-1.263	0.117	0.071	1.116	0.844	0.836	-0.729	1.949	0.561	-0.911	0.488	-0.227	0.775	0.997	-0.776
class-specific genes	205831_at	CD2	-0.195	-0.076	-0.103	0.288	1.651	0.171	1.063	-0.927	-0.111	-0.28	-1.229	-0.464	0.467	0.312	-0.246	-0.115	0.044	-0.136	-0.682	0.084	-1.245	-0.803	0.611	0.364	-0.564	0.259	0.169	-0.093	0.215	-0.213	-0.206	-1.087	0.219	0.652	-0.362	0.077	-0.387	-0.067	0.204	-0.564	-0.582	-1.147	0.534	-0.177	0.127	0.41	0.655
class-specific genes	214450_at	CTSW	-0.448	-0.936	0.07	0.207	1.446	0.296	0.372	-0.705	0.43	1.321	0.445	-0.851	1.382	1.378	-0.526	-0.16	0.485	1.127	0.085	-0.629	-1.137	-0.864	-0.86	-0.145	-1.007	1.462	-0.556	-0.697	1.223	1.22	0.15	0.095	-0.621	0.653	2.292	-0.222	1.107	0.443	-0.439	0.618	-0.447	-0.59	0.476	1.299	1.773	-0.276	0.197
class-specific genes	205267_at	POU2AF1	0.38	0.498	-0.201	-0.986	0.718	0.667	-0.006	-0.64	-0.332	0.637	1.193	0.599	0.797	1.038	-0.066	0.046	-1.129	0.781	-0.05	-0.502	-3.804	-1.243	0.662	0.514	-1.205	0.36	1.423	-0.233	-0.409	-1.39	0.088	-1.001	1.278	0.351	-0.948	0.046	0.677	-0.138	0.84	0.743	0.665	-0.541	0.147	0.331	0	1.408	-0.026
class-specific genes	205861_at	SPIB	-0.171	0.445	-0.166	0.123	-0.553	0.616	-0.079	-0.373	-0.361	-0.826	-0.952	0.125	-0.055	-0.201	-0.293	0.424	-1.076	-0.438	-0.31	-0.491	-0.647	0.346	0.063	-0.58	-0.904	-1.046	0.368	-1.618	-0.515	-0.853	1.374	0.343	0.429	-0.238	0	-0.235	-1.28	-0.948	-0.419	-0.496	-0.349	-2.1	0.312	0.711	0.341	0.826	0.088
class-specific genes	235401_s_at	FCRLA	0.004	-2.183	-1.059	-2.183	-0.497	-1.523	0.753	0.03	-2.183	-0.094	-1.269	-2.53	-1.168	0.978	-0.88	-0.225	-2.653	-0.472	-1.475	0.308	-1.516	0.635	-2.042	0.091	0.204	0.711	0.463	0.425	-1.809	-2.78	0	0.011	-0.946	0.608	-1.515	-1.832	0.571	1.044	1.035	-1.099	0.467	0.833	0.11	-0.953	0.736	-0.666	-1.536
class-specific genes	211339_s_at	ITK	-0.172	-0.317	-1.146	0.208	0.389	-0.103	0.018	-1.298	0.77	-0.439	-0.697	-0.234	-0.264	-0.212	-1.087	-0.324	-1.128	-0.3	-0.718	-0.527	-2.03	-1.502	-0.325	0.371	-0.304	0.121	0.174	-1.515	-0.878	-0.896	-1.414	-1.596	-0.143	0.151	-0.005	-0.581	-0.044	1.029	0.708	-0.942	-0.626	-0.217	0.355	0	-1.065	-0.498	-0.135
class-specific genes	230756_at	ZNF683	-0.565	-0.428	0.034	-0.238	0.17	-2.47	0.509	-0.115	0.642	0.042	1.134	-2.281	-0.169	0.935	0.276	0.69	0.3	0.305	-0.511	0.103	-0.768	0.204	-1.436	-0.469	0.629	1.336	0.641	0.888	0.181	-1.706	-2.438	-1.219	0.393	0.422	0.295	0.099	0.902	0.733	-0.635	-0.068	0.277	0.236	0.906	-0.881	0.427	0.753	0.737
class-specific genes	226147_s_at	PIGR	-0.362	0.328	0.211	-1.289	-0.977	0.241	0.408	-0.016	0.789	-0.387	-0.836	0.527	-0.505	0.251	0.068	1.361	0.622	-0.148	-0.04	-2.18	1.769	1.375	0.924	1.336	-0.698	-0.565	1.45	1.062	0.024	0.984	1.928	0.319	1.66	0.77	0.785	0.163	0.689	1.222	-0.116	-0.34	-0.821	-1.2	0.262	-0.047	0.313	0.355	0.184
class-specific genes	227711_at	GTSF1	-0.478	0.095	0.101	0.04	1.157	-0.201	0.259	-0.219	-0.235	-0.157	0.095	-3.258	-0.385	-0.923	-1.008	-0.465	-1.077	-0.28	-0.809	-0.622	-1.892	-0.855	0.325	0.497	-0.077	0.369	0.656	-0.541	-0.139	-0.784	-1.536	-0.251	0.021	0.293	-0.07	0.522	2.512	-0.123	-1.852	-1.837	0.011	3.571	-0.265	-0.503	0.258	-1.966	0.476
class-specific genes	208209_s_at	C4BPB	0.694	-0.084	0.44	0.266	1.048	0.694	1.15	-0.026	0.971	-0.302	-0.197	-0.555	0.595	0.698	0.645	-0.557	-0.901	1.937	0.918	-0.93	2.901	-0.392	-0.599	1.858	0.082	-0.32	-0.295	-0.67	-0.637	-1.389	2.372	-0.777	2.001	-0.367	-0.458	-0.215	0.954	-0.393	-0.304	-1.25	-0.017	-0.299	-0.5	-0.601	-0.412	1.962	-0.4
class-specific genes	206680_at	CD5L	-1.73	-0.403	-0.816	-0.965	1.128	-0.302	1.383	0.201	2.161	-1.062	-0.158	0.06	0.609	0.392	0.98	1.365	-0.043	-0.095	-1.602	-1.694	0.571	0.429	0.311	0.665	-0.457	1.633	-1.107	1.649	-0.591	0.43	-1.265	-0.987	-0.683	1.064	0.487	1.556	-0.843	-0.811	1.229	0.419	1.458	0.217	0.816	-1.078	-0.637	-0.874	1.071
class-specific genes	1555745_a_at	LYZ	0.258	1.189	0.337	0.382	-1.112	-1.081	-0.671	-0.564	0.791	-0.389	0.544	-0.858	-1.353	-0.943	-1.141	-0.344	-2.136	-0.977	-0.752	-1.019	0.02	0.838	0.866	-0.065	1.169	0.558	0.143	-0.169	-0.46	0.453	2.708	-0.861	2.649	-0.332	0.364	0.561	0.315	0.83	-0.265	-2.597	1.104	-0.813	0.785	-2.872	-0.715	0.182	-1.534
class-specific genes	214461_at	LBP	-0.435	-0.428	-0.038	1.032	0.347	0.626	-0.566	-0.575	1.441	-0.696	-0.276	-1.328	0.244	-0.264	-1.121	-0.897	0.019	0.138	1.211	0.216	1.491	-0.67	3.785	0.324	0.149	0.191	3.307	1.352	-0.251	-0.756	-0.274	-0.469	0.034	0.309	-0.751	0.181	-0.516	0.623	0.654	-0.589	0.269	1.482	-0.401	0.149	-0.393	0.544	0.429
class-specific genes	xxx	NA	NA	NA	NA	NA	NA	NA	NA	NA	NA	NA	NA	NA	NA	NA	NA	NA	NA	NA	NA	NA	NA	NA	NA	NA	NA	NA	NA	NA	NA	NA	NA	NA	NA	NA	NA	NA	NA	NA	NA	NA	NA	NA	NA	NA	NA	NA	NA
class-specific genes	220051_at	PRSS21	-1.095	-1.549	-0.774	-0.361	0.7	0.628	0.027	-0.926	2.565	0.004	0.419	0.156	0.252	2.569	-1.909	0.844	-0.905	-0.384	-0.774	-0.504	-2.592	-0.062	-1.362	1.058	-0.003	0.778	-0.936	0.478	-0.085	-1.817	0.632	1.984	0.541	1.175	-1.4	1.165	0.707	1.134	1.279	0.13	0.186	-1.158	0.22	0.385	1.326	1.661	-0.542
class-specific genes	223484_at	C15orf48	0.285	0.23	0.695	0.122	0.103	0.46	0.676	0.088	0.192	0.626	0.05	0.922	0.71	0.486	0.756	1.093	1.111	2.748	2.021	-0.067	0.61	-0.145	-0.002	-0.164	0.377	-0.361	-0.13	1.012	-0.083	-0.171	2.175	-0.638	1.353	-0.346	-0.495	1.329	-0.303	1.732	-1.571	0.445	-0.487	0.996	-0.145	0.007	0	-0.049	0.536
class-specific genes	222838_at	SLAMF7	-0.643	-0.023	-0.346	-0.346	0.847	-0.157	0.708	-0.55	-1.075	0.537	0.205	0.403	0.576	0.719	0.129	-0.109	-0.201	0.654	-0.472	-0.182	-1.009	-0.568	0.494	-0.253	0.286	0.422	0.395	-0.344	0.306	-0.061	-1.04	-0.391	0.574	0.23	0.206	-1.066	0.042	-0.93	0.702	0.527	0.68	-0.38	0.023	-0.575	-0.066	0.403	0.176
class-specific genes	204533_at	CXCL10	-0.457	1	-0.175	0.623	-0.309	0.038	1.532	-0.391	-0.127	1.154	-0.664	-0.064	-0.99	1.094	-0.132	0.699	0.759	1.001	-0.363	0.608	0.698	-1.15	0.311	0.578	-0.221	0.381	-0.277	-0.796	0.216	0.907	-1.678	0.265	-0.288	1.13	-0.459	1.01	0.243	0.313	0.955	0.919	0.082	0.268	0.812	-0.418	0.88	-0.273	0.014
class-specific genes	206641_at	TNFRSF17	0.106	0.664	0.213	-0.733	-0.272	0.737	0.025	-0.44	-0.348	0.715	0.638	0.597	0.679	0.673	0.154	0.222	-1.228	0.86	0.08	-1.346	-2.022	-1.061	0.615	0.77	0.338	1.036	0.4	0.193	0.101	-2.169	-1.479	-0.813	0.795	0.577	0.056	-0.574	1.038	-1.3	1.048	0.755	0.674	-0.698	-0.738	0.29	-1.584	1.266	0.266
class-specific genes	210164_at	GZMB	-0.927	-0.703	1.047	2.195	1.906	-0.879	0.151	1.953	-0.452	0.671	-0.244	1.234	-1.366	0.033	0.549	0.248	-0.638	-0.423	-0.659	-0.311	-0.787	-1.167	-2.107	0.15	-0.48	1.444	-0.07	-0.724	0.33	-0.498	-0.787	-0.009	-0.15	0	-0.081	0.333	-0.381	-0.098	0.141	-0.174	0.366	-0.478	0.956	-0.701	1.215	0.036	-0.184
class-specific genes	206478_at	KIAA0125	-0.238	-0.518	-0.745	-0.144	0.078	-0.506	-0.914	0.076	-2.734	0.15	-0.61	-0.646	0.394	0.192	-1.203	0.012	-1.043	-0.673	-0.473	-1.297	-1.19	-0.381	-0.035	0.412	0.43	0.535	0.205	-0.825	-0.183	-1.893	-0.527	0.577	0.352	-0.162	0.268	-1.179	0.137	0.219	0.859	-0.433	0.499	0.289	-0.615	-1.776	-0.312	1.246	0.719
class-specific genes	237909_at	ADAM6	-1.734	-0.283	-0.741	-0.56	1.091	-0.687	-0.047	-0.908	-0.028	0.638	-1.569	-1.734	-1.312	-3.118	-1.461	0.006	0.111	-0.855	-0.551	-2.687	-1.963	-0.293	-0.171	0.241	0.823	-1.57	0.241	-0.958	-0.554	-0.414	-1.339	-0.018	0.443	-0.401	0.331	0.557	-1.093	0.356	0.575	-1.299	0.168	0.332	0.441	-0.116	0.582	1.055	-0.529
class-specific genes	207339_s_at	LTB	-0.373	-0.824	-0.804	-0.045	0.552	0.534	0.239	-0.652	-0.115	-0.044	0.349	0.04	-0.246	0.268	-0.991	-0.076	-1.183	-0.789	0.262	-0.519	-1.853	-0.907	0.127	0.774	0.482	1.023	-0.33	-0.008	-0.4	-0.579	-0.128	-1.131	-0.697	-0.512	0.126	-0.866	0.439	-0.706	0.639	-0.56	-0.523	-0.679	-0.013	0.499	0.633	0.271	1.393
class-specific genes	233132_at	LOC96610	-1.014	-1.011	-1.491	-1.054	0.045	-0.165	0.636	0.233	1.384	-0.937	-0.255	0.303	-0.195	0.888	-0.274	-0.44	0.711	0.528	0.697	-0.042	-0.996	0.14	0.216	1.08	0.843	1.827	0.228	0.134	-0.085	0.004	-1.318	-0.666	-0.908	0.102	1.669	-1.451	0.875	-0.5	0.24	-0.506	-0.769	0.569	-0.543	-0.943	0.892	-1.071	1.021
class-specific genes	206126_at	CXCR5	-0.424	-0.194	-0.177	-0.379	0.847	-0.73	-1.248	-2.136	0.908	-0.066	-1.224	-2.684	0.404	0.52	-0.991	-1.054	-2.114	0.65	-1.784	-1.846	-1.521	-1.093	-1.293	0.943	1.239	0.631	-1.547	-1.605	-1.618	-2.456	0.176	0.531	1.683	-0.881	-0.535	-0.023	-0.05	1.019	0.666	-0.345	-1.807	0	-0.429	-0.188	1.243	-1.887	0.882
class-specific genes	213539_at	CD3D	0.123	0.18	0.123	0.041	1.194	-0.535	0.272	-1.1	-0.411	0.035	-1.699	-0.26	0.419	0.753	0.092	-0.784	-0.148	0.088	-0.625	0.199	-1.1	-0.894	0.023	0.447	-0.609	0.56	0.437	-0.19	-0.066	0.023	-0.363	-0.896	0.521	0.386	-0.182	-0.353	0.21	0.303	-0.117	-0.356	-0.321	-0.572	0.803	0.123	0.607	0.856	0.721
class-specific genes	240070_at	TIGIT	-1.032	0.528	-0.692	0.236	0.612	0.542	-0.214	-0.681	-0.642	-1.179	-0.71	-0.779	-0.695	-0.106	-0.384	-0.137	-1.117	0.083	0.026	0.086	-1.793	-0.923	0.246	0.244	-1.729	0.201	0.56	0.467	-1.787	-0.894	-1.078	-1.115	0.24	0.28	0.47	0.588	-0.84	0.373	-0.365	-0.112	-0.231	-2.525	0.696	-0.963	-2.772	0.172	0.75
class-specific genes	205544_s_at	CR2	0.438	-1.147	0.135	-1.34	0.952	0.483	-0.314	-0.343	-0.862	-0.505	0.568	-0.02	-0.37	0.603	-0.43	-1.549	-0.315	-0.717	-0.948	-1.165	-0.167	-1.32	0.892	-0.371	-1.354	0.118	-0.682	-0.669	-1.115	-1.115	-1.618	1.083	-0.449	-0.789	-0.036	-1.317	-0.862	0.123	-0.054	-2.17	0.101	1.023	0.408	-0.249	-0.663	1.138	0.228
class-specific genes	211123_at	SLC5A5	-0.039	-0.421	0.014	-0.019	0.856	-0.332	-0.719	-0.617	-0.676	-0.56	0.401	-0.676	-1.62	-1.074	-2.461	-0.001	0.098	-0.621	-2.79	-0.285	-0.99	0.245	0.94	-0.273	0.209	1.126	0.583	-1.51	-0.816	-2.938	0.219	0.275	0.891	0.905	-0.446	0.814	-0.559	-2.762	-0.49	-1.351	1.132	0.733	-0.582	0.487	-0.073	0.394	0.645
class-specific genes	236854_at	LOC284749	-0.769	-0.463	-1.085	-1.685	-1.351	0.575	0.119	-0.343	0.884	-0.372	0.721	-0.42	-2.227	-0.547	-1.396	-1.126	-0.552	-0.169	-0.384	-2.12	-1.679	0.87	-0.388	0.248	0.469	0.397	-0.117	1.028	-0.051	-0.721	-2.873	-0.722	-0.73	0.763	-1.641	-2.072	0.84	0.012	0.29	-2.481	-0.847	0.601	1.184	0.389	0.341	0.698	0.449
class-specific genes	205049_s_at	CD79A	-0.267	0.593	0.487	-0.549	-1.4	0.125	-2.242	-1.876	-1.753	0.219	0.471	-0.041	0.75	0.595	-0.151	-0.38	-1.146	-0.285	-0.289	-0.704	-1.393	-1.025	0.41	0.995	0.498	0.311	0.241	0.311	-1.654	-1.709	0.147	0.144	-0.39	0.622	0.142	0.096	0.809	0.24	0.888	0.02	0.074	0.465	-0.76	0.025	-0.154	1.128	-0.687
class-specific genes	205654_at	C4BPA	1.649	-0.154	0.221	0.775	0.033	0.168	-0.064	-0.382	0.364	-0.476	-0.399	-0.949	-0.309	0.19	0.036	-0.625	0.852	-1.925	-0.054	-1.039	0.175	0.738	2.086	1.311	-0.521	-1.265	0.475	-1.195	-1.058	0.187	0.397	-1.302	0.392	-0.22	0.315	0.344	1.423	0.985	-0.219	1.187	-0.603	0.162	-0.287	-0.465	0.67	1.027	0.818
class-specific genes	217147_s_at	TRAT1	-0.799	-1.04	-2.044	-0.341	0.017	-0.592	-1.026	-0.919	0.641	0.252	-1.408	-1.108	-0.065	-0.343	-1.868	-0.535	-0.186	-0.506	0.105	-0.864	-1.475	-1.951	-0.091	0.017	-2.542	0.803	0.29	-2.235	-0.21	-0.65	-0.157	-0.909	0.391	-0.169	-1.035	-0.614	0.496	-0.327	0.535	-1.281	-0.071	-0.064	-0.093	-0.028	-1.966	0.403	0.592
class-specific genes	210313_at	LILRA4	-2.01	-0.842	-0.151	-0.12	-1.057	0.612	-0.763	-0.423	0.764	0.154	1.01	-0.353	-0.002	0.433	0.246	0.841	-0.188	0.639	0.119	-1.802	-0.924	0.546	0.505	0.64	1.385	1.34	0.746	0.532	0.572	-0.627	-0.838	-0.2	1.12	0.408	-0.534	0.491	0.169	0.573	0.314	-0.196	0.747	-1.348	1.173	0.734	0.331	0.676	-0.515
class-specific genes	216987_at	IRF4	-0.574	0.371	-0.955	-0.158	2.383	0.624	-0.833	1.212	-0.06	-0.632	1.421	-0.31	-1.205	-0.352	0.796	1.603	-0.646	-0.201	-0.27	-1.602	-0.735	0.056	1.313	0.216	0.022	1.706	1.584	0.065	-0.981	0.27	-1.908	-1.33	0.426	-0.615	1.545	-1.273	-0.375	-0.566	-0.695	-1.121	1.943	2.015	-0.071	-0.851	0.29	0	-0.897
class-specific genes	206666_at	GZMK	-1.272	-0.381	-0.87	0.444	1.328	-0.587	0.413	-0.746	-0.566	-0.131	0.449	-0.437	0.538	0.36	-0.711	-0.726	-0.137	-0.195	-0.137	0.078	-1.485	-0.824	0.199	0.553	0.069	0.281	0.198	-0.125	0.066	0.384	-1.753	-1.533	-0.485	-0.001	0.017	-0.116	0.4	0.058	0.275	-0.645	-0.514	-1.679	0.08	-0.143	-0.101	0.272	-0.046
class-specific genes	206513_at	AIM2	-0.079	-0.454	-0.178	-0.153	0.625	-0.485	-0.265	-0.273	-0.269	-0.259	-0.108	-1.197	-0.923	0.817	-0.231	-0.209	-2.303	-0.047	-2.772	-2.032	-0.417	-1.219	-0.003	0.616	0.217	0.911	0.711	-0.546	-0.111	-2.006	-2.525	-0.704	-2.061	0.067	0.667	0.507	0.097	-4.704	-0.037	-0.486	1.14	0.879	1.721	-0.772	0.315	0.109	-0.102
class-specific genes	206255_at	BLK	-0.835	0.407	-0.089	-0.199	-0.299	0.349	-0.393	-0.927	0.163	-1.229	-0.738	-0.627	0.049	-0.149	-1.229	-0.663	-0.818	0.787	-0.082	-1.016	-1.048	-0.854	1.574	1.561	1.24	2.621	0.226	-0.094	-0.321	-0.565	-0.144	1.315	0	0.339	-0.859	1.525	-0.134	-0.134	-0.238	-1.015	0.981	-0.274	-0.066	0.175	0.673	-0.72	-0.293
class-specific genes	1569040_s_at	FLJ40330	-0.771	0.774	-0.468	-0.653	0.17	0.226	-0.005	-0.232	-0.137	0.847	0.86	0.62	0.709	0.968	-0.138	-0.126	-1.065	0.499	-0.312	-0.65	-2.319	-0.767	0.007	0.224	0.196	-0.139	0.534	0.055	-1.914	-0.401	-0.903	0.188	0.245	-0.528	-0.666	-0.165	0.153	-2.703	0.584	0.691	0.725	-0.523	-1.525	-0.346	0.397	1.117	-0.106
class-specific genes	210029_at	IDO1	-0.387	0.446	-0.036	0.768	0.773	0.278	0.225	-0.274	-0.082	0.522	-1.984	-0.212	-1.282	0.197	-0.243	0.143	-0.118	0.248	-0.255	-0.028	-0.344	-1.408	-0.531	0.725	-0.915	-0.348	0.488	0.088	-0.24	-0.416	-1.977	0.191	-1.553	0.563	0.75	0.928	-0.041	0.117	-0.213	0.267	-1.33	-0.507	1.432	-0.793	0.694	0.045	0.758
class-specific genes	235863_at	JSRP1	-1.269	1.22	-0.167	-0.31	-0.011	0.482	-0.946	0.075	0.372	1.467	3.142	-0.424	0.877	1.979	1.497	0.497	-0.855	1.443	1.125	-0.513	-0.172	-0.367	-1.202	0.652	0.974	1.488	0.614	1.662	0.471	-0.595	-1.813	-0.497	1.974	-0.93	0.483	-0.985	0.007	2.028	0.097	-0.451	-0.062	-0.363	0.028	0.186	0.351	0.798	1.962
class-specific genes	211122_s_at	CXCL11	0.141	1.521	-0.105	-0.012	-2.424	0.52	0.679	0.018	-0.749	1.718	0.342	0.847	-0.586	0.338	-0.134	0.115	0.485	0.513	-0.965	0.209	0.597	-0.749	-1.645	0.618	-2.69	0.164	-0.339	-1.011	0.385	0.37	-1.405	0.484	-0.444	0.595	-0.366	1.186	0.38	-0.124	0.451	1.023	-0.083	0.129	1.553	-0.111	1.179	-0.617	-0.023
class-specific genes	1554974_at	ACY3	1.431	0.617	0.067	-0.27	0.183	1.839	-0.686	-1.443	1.855	1.123	1.623	1.071	1.186	-0.114	1.347	2.251	-0.941	-0.963	-0.132	0.898	1.444	0.155	0.431	0.235	0.955	-1.176	0.373	-2.093	0.755	0.722	2.402	0.738	1.525	-0.72	1.597	0.446	2.025	1.27	0.735	0.839	-0.252	0.534	0.828	1.366	1.421	-0.779	-0.903
class-specific genes	1554190_s_at	C10orf81	0.989	0.076	-0.211	-0.889	-0.098	-0.474	0.327	-0.026	-0.432	-0.599	0.359	-1.198	0.317	-0.109	0.058	0.582	0.106	0.31	-0.844	-2.562	0.22	-0.778	0.36	1.013	0.045	-0.225	-0.975	-1.522	0.968	-0.173	0.356	-0.591	-0.644	0.645	0.117	0.114	0.906	0.702	-1.462	-0.372	-0.691	-1.515	-0.24	0.514	0.48	0.648	1.318
class-specific genes	219014_at	PLAC8	0.172	1.027	0.968	-0.16	1.082	0.681	1.23	1.447	0.983	0.414	-0.177	1.105	1.196	0.475	1.118	0.75	-2.265	0.511	-0.903	-0.8	-0.24	0.201	-0.387	-0.098	-0.558	0.309	0.189	-0.007	0.073	-0.856	3.354	-1.271	2.835	-1.278	-0.505	0.193	0.117	-0.36	0.04	-0.324	-0.674	-0.006	0.71	-0.792	-0.164	-2.973	2.128
class-specific genes	213915_at	NKG7	-0.374	-0.623	0.752	0.523	1.437	-0.364	0.756	-1.356	0.225	-0.068	-0.329	0.059	0.19	0.164	-0.076	-1.309	-0.211	0.145	-1.439	0.258	-0.815	-0.848	-0.003	0.176	-2.189	0.852	0.667	-0.192	0.277	0.235	0.248	-1.785	0	0.301	-0.414	-0.304	0.8	0.861	0.621	-1.049	0.4	-1.519	0.652	-0.682	0.458	-0.33	-0.216
class-specific genes	230720_at	RNF182	-0.608	-0.082	-1.168	-0.69	0.215	-0.741	-0.525	-0.472	0.604	-0.035	-0.6	-1.8	-1.383	-0.937	-0.913	-0.819	-0.764	-2.675	-1.001	-5.43	-1.195	-0.071	0.012	-0.195	-1.273	1.36	0.073	-0.212	0.17	-2.919	-3.118	-0.587	-0.675	0.294	-1.059	0.546	1.262	0.481	1.915	1.474	0.5	1.903	-0.302	0.034	1.218	0.425	-0.187
class-specific genes	207035_at	SLC30A3	-1.651	-0.598	-0.532	-0.545	0.917	0.308	-0.197	-0.506	-0.346	-0.897	0.344	-2.022	-1.427	-0.881	-1.526	-0.112	1.778	-1.235	-0.062	-1.165	-1.353	-0.19	-0.284	0.637	0.292	0.997	0.751	-1.297	-0.468	-2.488	-0.057	0.091	0.222	-0.333	-0.399	0.368	-0.247	0.247	0.082	0.669	1.501	-0.497	0.071	-0.884	0.371	0.479	-0.195
class-specific genes	227760_at	IGFBPL1	-0.753	-2.411	-1.281	0.313	0.639	0.032	0.327	-1.371	-1.016	-1.498	0.232	-0.731	-0.358	-1.715	-0.233	0.332	-0.429	-0.012	-1.874	-0.349	-2.233	0.625	0.131	1.51	0.74	0.805	-0.886	0.526	0.414	-1.749	0.262	-0.56	0.855	0.445	0.636	-0.117	-1.141	0.006	-1.552	0.123	0.121	-0.284	-0.872	0.179	2.164	1.146	0.049
class-specific genes	214822_at	FAM5B	-0.78	-0.979	-1.108	-0.106	-0.463	-0.584	-0.193	-0.205	0.115	0.52	-0.79	-0.646	-0.682	-0.396	-1.016	0.157	-0.111	-0.269	-1.121	-1.034	-0.189	-0.633	-0.183	-0.201	1.24	1.155	1.853	-0.284	-0.668	-1.401	-0.949	-0.352	0.149	-0.015	0.914	0.136	-0.278	2.474	-0.194	1.012	0.856	0.634	-0.662	0.562	-0.003	0.694	-0.776
class-specific genes	206634_at	SIX3	-0.072	0.384	-0.096	-1.734	1.206	-0.108	-1.317	0.335	0.849	-1.307	0.632	-0.775	0.004	-0.04	-0.28	0.374	-1.937	-0.667	-1.682	-0.388	-0.249	-0.481	0.497	-0.325	0.493	0.869	-0.669	-0.168	0.431	-1.791	-1.402	0.363	-0.051	0.626	0.428	-1.316	-0.877	0.365	0.452	-0.687	0.383	0.876	-0.838	0.338	0.45	-0.828	0.421
class-specific genes	219537_x_at	DLL3	-0.808	-0.031	0.113	-0.497	0.929	0.682	-0.193	0.02	0.341	0.862	-0.889	-0.502	-1.036	-0.461	-0.429	0.546	-0.567	-1.892	-1.173	-0.498	-0.504	-0.084	-1.864	1.548	0.938	-1.72	0.531	-0.946	0.031	-2.273	-0.519	0.129	-1.418	0.982	-0.608	0.957	-0.949	0.301	0.726	-0.106	0.501	0.916	0.169	-0.308	-1.238	-1.576	-1.528
class-specific genes	204697_s_at	CHGA	-0.031	0.949	1.197	-0.596	0.349	1.556	1.461	0.5	1.36	0.624	-0.067	1.635	0.194	-0.075	0.653	0.502	-0.089	-2.583	4.501	1.409	-2.247	0.473	0.483	0.221	0.118	0.966	-1.286	-0.82	-0.29	-0.876	0.764	-0.279	-0.356	0.477	0.135	0.472	-0.743	1.93	0.02	-0.567	1.107	-0.208	0.536	0.979	-0.374	0.801	1.824
class-specific genes	225482_at	KIF1A	-0.308	-1.271	-0.523	-0.215	0.379	-0.351	0.279	-0.523	0.479	1.488	-0.09	-1.668	-1.826	-2.002	-0.846	0.502	-0.475	-0.537	1.688	1.604	-0.894	1.359	-0.605	0.412	0.964	1.109	1.206	-0.671	-0.751	-1.077	-0.711	-0.349	-0.564	-0.328	-0.521	0.181	1.783	-0.03	-0.49	1.606	0.124	1.713	1.383	-0.286	1.442	-0.608	-0.443
class-specific genes	219877_at	ZMAT4	-0.046	-0.389	-1.058	-0.646	-0.503	-0.169	2.108	-0.669	-0.699	-0.64	1.807	-1.471	-1.616	-1.29	-0.545	-0.301	-0.713	0.035	-0.717	0.36	-1.483	-0.652	-0.976	1.349	1.885	2.046	-0.551	-0.734	0.592	-0.474	-0.924	-1.625	-0.273	-0.562	-0.787	-0.71	1.24	0.342	-0.048	-1.404	1.119	-0.487	0.732	0.789	-0.536	1.476	-0.3
class-specific genes	205670_at	GAL3ST1	-1.14	0.668	0.934	0.711	0.104	0.565	1.271	0.871	1.758	1.456	1.651	0.866	0.547	0.843	0.623	0.335	-1.255	1.059	-0.096	-0.044	-1.335	-0.481	0.972	0.63	-0.433	0.284	0.394	-0.847	-0.094	0.954	1.827	2.398	2.314	-1.046	1.775	0.156	-1.181	-0.117	0.335	0.662	-0.362	-1.172	1.932	1.441	0.845	0.775	-0.304
class-specific genes	240236_at	STXBP5L	-2.392	-1.233	0.651	-0.559	0.833	-0.046	0.076	-1.187	-1.389	0.241	0.029	0.561	-0.067	-1.98	-2.028	-2.25	-0.378	0.401	-2.35	-2.463	-0.275	-2.066	-1.644	1.314	0.176	-1.222	0.324	-0.1	-0.143	-1.605	-0.571	-0.574	0.32	0.084	0.487	-0.023	-2.554	-1.095	-1.677	-0.375	1.577	0.959	-0.559	-0.243	0.66	0.636	-0.891
class-specific genes	232760_at	TEX15	-0.41	0.277	-1.315	0.148	0.748	0.274	0.399	-2.474	0.479	-0.353	0.545	-0.773	-0.563	-0.331	-1.843	-1.517	-1.911	-1.911	-0.643	-1.399	-0.159	-0.494	-1.206	0.441	-0.421	0.857	-1.326	-0.315	-0.147	0.178	-0.06	0.16	0.625	-0.697	0.19	0.219	-1.528	-1.475	2.887	0.886	-1.051	-0.049	-0.145	0.108	-1.924	-0.574	-0.073
class-specific genes	xxx	NA	NA	NA	NA	NA	NA	NA	NA	NA	NA	NA	NA	NA	NA	NA	NA	NA	NA	NA	NA	NA	NA	NA	NA	NA	NA	NA	NA	NA	NA	NA	NA	NA	NA	NA	NA	NA	NA	NA	NA	NA	NA	NA	NA	NA	NA	NA	NA
class-specific genes	1554242_a_at	COCH	0.671	-1.235	-1.283	-1.604	0.381	0.263	-0.348	0.982	1.171	-1.541	-1.903	-0.303	0.742	-1.502	0.971	-0.706	-0.981	-0.461	-2.297	-0.693	0.192	1.395	0.082	1.555	0.373	0.092	-0.677	-0.391	-1.088	-0.03	-1.337	-1.788	0.057	-0.041	-0.02	-1.561	-0.568	-0.663	-0.758	0.208	0.622	0.473	-1.934	0.811	0.57	0.894	0.731
class-specific genes	209987_s_at	ASCL1	-0.445	-2.044	-1.957	-1.93	1.265	-1.255	0.913	0.442	-0.574	-1.365	1.076	-2.245	-1.634	-2.139	-1.957	-0.566	-1.519	0.262	-0.289	-1.087	-0.275	0.008	0.879	1.342	-0.914	1.353	-0.416	0.447	-0.545	-0.878	-1.195	-1.16	-0.521	-0.972	-0.382	-0.309	-0.795	1.246	0.577	-0.615	0.238	0.816	-1.458	-2.096	0.368	0.73	0.715
class-specific genes	212094_at	PEG10	-1.051	-0.406	-0.917	0.31	-1.572	-1.593	-0.888	0.43	0.476	-1.142	0.151	-0.675	-0.504	1.28	-0.382	1.134	1.433	-0.855	0.792	0.093	0.87	-1.07	-0.987	-0.038	0.476	0.084	-0.732	0.191	1.514	1.393	-1.078	0.417	-1.097	1.772	-1.546	1.408	0.898	0.433	0.951	0.546	1.322	0.942	0	-1.41	-0.203	-1.548	-0.195
class-specific genes	228912_at	VIL1	0.164	0.26	0.445	0.522	-0.062	0.12	0.292	0.146	-0.393	0.132	0.162	0.287	0.348	0.436	0.334	-0.279	-2.627	-0.074	-0.808	-0.653	-2.639	0.931	-0.824	0.168	-0.421	0.154	0.004	-1.901	-0.482	1.265	2.34	0.012	2.136	-0.293	0.022	0.055	0.296	-1.266	-0.572	-1.662	-1.343	-0.684	2.588	-2.009	0.526	0.446	-0.943
class-specific genes	235420_at	HAPLN4	-1.086	-0.156	0.427	0.629	1.763	-0.211	-0.204	-0.108	1.233	0.537	0.078	-2.507	-1.391	-0.888	-2.071	-0.735	-1.495	0.379	-1.842	-0.706	-1.276	0.268	-0.793	0.775	-0.964	-0.27	-0.598	0.091	0.426	-0.175	-0.898	0.772	2.329	-0.03	-0.618	-0.422	0.634	-0.79	-1.237	-2.262	-0.542	-1.805	-0.93	0.375	-2.044	0.57	-0.836
class-specific genes	227377_at	IGF2BP1	-1.18	0.524	-0.391	-0.034	0.29	-0.833	-0.486	0.741	0.194	-0.97	-0.988	-0.794	-1.573	1.616	-1.26	-0.836	0.154	-1.84	0.082	-0.785	0.625	-0.637	-0.422	0.053	0.295	1.548	0.769	-0.426	-0.243	-2.041	-0.586	1.27	0.238	-0.006	-0.311	0.447	-0.659	-0.518	0.093	-0.277	0.887	1.091	0.596	-0.773	-0.458	-0.316	0.459
class-specific genes	219196_at	SCG3	0.323	-1.506	0.741	-1.328	1.169	0.269	0.904	-1.506	-0.225	0.911	-0.092	-0.696	-1.162	-0.782	0.833	0.263	-1.475	0.071	-1.263	-1.583	-0.968	-1.065	-0.407	0.89	-0.753	1.315	1.346	-0.682	-0.606	-0.337	-0.534	-0.624	0.845	1.123	0.077	1.001	-0.831	1.516	1.06	-0.813	-0.065	0.217	1.747	-0.386	-0.498	-0.274	0.233
class-specific genes	1555719_a_at	C3orf15	-2.835	-1.971	0.432	0.078	0.602	-1.893	0.286	0.264	-0.864	0.361	0.744	-1.57	-1.705	0.225	-0.389	0.567	0.218	-0.603	-0.406	-0.177	-3.035	0.365	0.297	0.556	0.052	0.486	0.457	-0.031	-3.708	-0.55	-0.072	-0.089	0.194	0.544	-0.333	0.66	0.874	0.751	0.32	-0.627	0.239	0.099	0.879	0.3	0.136	-0.686	0.829
class-specific genes	210246_s_at	ABCC8	0.958	-0.265	0.876	0.491	0.301	-0.693	0.749	0.139	-0.791	-1.581	-0.356	-1.539	-0.328	-1.833	-0.67	-0.181	1.991	1.044	1.098	0.623	-0.521	0.769	-0.219	0.26	0.765	1.118	-0.851	-0.972	0.372	-0.306	0.736	0.034	-0.047	0.136	-0.245	-0.343	0.056	0.11	-0.245	-0.343	-0.361	0.345	0.891	-1.131	0.466	-0.754	0.166
class-specific genes	220868_s_at	SLC7A10	-1.864	-1.543	-0.472	0.553	-0.207	0.69	-0.09	0.209	-1.674	-0.793	0.715	-0.967	-0.92	0.913	-0.925	1.124	0.205	-1.452	0.41	-1.706	-1.505	0.691	0.577	0.633	1.034	-0.024	-0.779	0.789	-0.865	-2.354	-1.817	0.522	0.9	-0.783	-0.188	-1.178	1.031	-0.276	1.144	-0.966	-0.559	0.616	-0.037	0.737	1.421	1.573	0.884
class-specific genes	210341_at	MYT1	0.064	-1.036	-1.716	0.251	-0.441	0.053	-0.779	1.222	1.11	0.808	0.948	-0.078	-1.126	0.133	0.144	0.704	-1.999	0.015	-0.918	0.058	-1.451	-0.967	-0.465	1.176	1.582	0.51	-0.405	-1.568	-0.773	-0.579	-1.071	-0.277	0.105	-0.087	-0.763	0.757	-0.79	-0.114	1.594	-0.29	0.693	1.53	0.859	1.333	1.678	-0.839	0.723
class-specific genes	223755_at	KIRREL2	-1.303	0.523	0.19	-0.063	1.983	-0.031	-0.676	-0.023	0.038	-1.38	-0.113	0.045	-0.403	2.226	-0.827	-0.302	-1.299	1.054	0.631	-1.016	-0.793	-1.267	-0.003	1.571	0.649	1.427	0.365	0.319	-0.815	-0.664	-0.62	-0.35	-0.419	-0.294	0.376	-0.708	1.476	2.061	0.701	-1.028	-0.656	-0.601	3.335	1.545	-0.324	0.16	0.048
class-specific genes	207149_at	CDH12	-0.657	-0.227	-0.755	0.15	1.017	0.595	-0.177	-0.238	0.757	-1.945	0.214	-2.244	-1.326	-3.139	-0.175	-0.643	-0.391	-0.4	-0.232	-0.698	-0.414	0.123	-0.884	-1.953	0.856	0.861	-0.256	-2.417	-0.513	-1.435	1.578	-0.156	0.234	-1.122	-0.616	-0.316	0.731	0.568	0.59	2.332	-0.092	-0.222	0.059	0.999	0.439	0.265	0.935
class-specific genes	1554850_at	VWA5B2	-1.098	0.692	-0.415	-1.62	-1.91	-0.608	-0.161	-1.582	-1.22	-2.453	-0.272	-1.519	-2.852	-2.141	-1.889	-0.227	-2.056	-0.484	-1.12	-0.045	-0.527	-1.075	-0.75	1.252	0.404	1.357	0.538	0.278	-1.341	-1.019	-0.615	-0.548	-1.093	-0.099	0	0.909	0.1	-0.855	0.339	-1.22	0.512	1.439	-0.334	-0.197	0.352	0.237	-1.053
class-specific genes	220126_at	TSP50	-1.018	0.968	-1.109	0.868	1.279	-0.657	0.197	0.674	0.446	-0.297	1.342	0.171	0.336	0.457	0.462	0.242	0.093	-0.426	-0.116	-2.192	0.314	-1.127	-0.433	-0.704	-1.042	-0.483	1.254	1.117	0.588	-1.398	-2.629	0.432	0.082	-0.351	-1.283	0.104	0.879	1.614	1.271	0.191	0.671	-0.745	0.513	0.635	-0.468	-0.998	0.926
class-specific genes	231667_at	SLC39A5	0.28	-1.099	1.352	0.379	0.6	0.327	0.771	1.57	1.123	-0.13	0.5	1.493	1.606	1.531	1.364	1.435	-1.273	-1.19	6.082	-1.362	-0.985	1.705	2.433	1.825	1.848	1.658	-0.205	1.528	-0.273	2.123	3.128	-0.085	0.218	-0.409	0.47	-0.462	0.588	1.173	0.491	-0.952	0.785	0.767	3.633	0.48	-0.317	-0.074	1.048
class-specific genes	238870_at	KCNK9	-1.894	0.478	0.293	-1.533	1.933	0.493	0.122	1.176	0.831	-0.568	-0.317	-1.175	-1.672	-1.879	0.76	-0.017	1.007	-0.175	-0.639	-0.961	-1.12	-0.453	1.075	-0.377	-0.432	0.474	-0.191	-0.45	-0.758	0.705	-0.624	1.076	1.09	0.65	2.286	0.864	0.963	-1.096	0.871	1.21	0.543	1.628	-0.171	0.541	-1.493	-0.55	-0.622
class-specific genes	219438_at	NKAIN1	0.003	0.727	-1.285	-0.129	-1.16	-2.003	-0.525	-1.659	-1.251	-0.66	0.367	-2.176	-1.47	-1.905	-2.055	-0.534	-0.302	0.158	-0.465	0.169	-1.628	-0.228	0.599	0.924	0.998	1.234	-0.75	-0.218	-0.144	-0.215	0.465	-0.948	-0.712	-0.895	0.294	-1.916	0.009	-0.68	-0.841	-1.225	1.263	0.058	-0.556	0	-1.142	0.824	-0.767
class-specific genes	205137_x_at	USH1C	0.574	0.282	0.566	0.443	0.149	0.513	0.628	0.279	0.369	-0.28	0.343	0.149	0.69	0.297	0.158	0.631	-1.327	0.778	-1.218	-2.008	-1.136	0.41	0.293	0.21	0.039	-0.593	0.152	0.032	0.037	0.847	2.114	-0.725	1.485	0.471	1.097	-0.739	-0.491	0.912	0.566	0.183	0.493	-1.277	2.601	-1.086	0.423	0.208	0.506
class-specific genes	xxx	NA	NA	NA	NA	NA	NA	NA	NA	NA	NA	NA	NA	NA	NA	NA	NA	NA	NA	NA	NA	NA	NA	NA	NA	NA	NA	NA	NA	NA	NA	NA	NA	NA	NA	NA	NA	NA	NA	NA	NA	NA	NA	NA	NA	NA	NA	NA	NA
class-specific genes	229080_at	EMID2	-0.879	-0.784	-0.443	1.45	1.549	-0.916	1.463	-1.204	-0.15	1.549	-0.425	0.931	-1.725	-1.528	0.164	0.004	0.939	-1.118	-0.602	-0.622	-0.855	-0.748	1.626	0.395	-0.572	-0.538	-0.081	0.163	-0.449	0.286	-1.154	0.745	0	-0.788	-1.269	-0.769	0.302	0.033	0.474	-1.992	-0.122	0.793	-0.04	0.699	0.398	-0.297	0.097
class-specific genes	228035_at	STK33	-0.681	-0.506	-0.186	0.851	0.196	1.195	0.367	-0.085	0.079	0.503	-0.156	-0.579	-0.072	-0.019	-1.344	0.316	-0.331	-1.438	-0.369	0.476	-1.277	1.335	1.314	0.302	-0.676	-0.032	0.864	1.905	-0.585	-1.577	-1.044	-1.448	-1.178	1.404	0.239	-0.099	1.006	-0.345	0.315	1.833	-0.92	0.441	0.366	0.26	0.38	-0.756	1.179
class-specific genes	205318_at	KIF5A	-0.528	-0.133	0.022	-0.625	1.47	-0.588	-0.57	-0.542	-1.383	-0.745	-0.215	-1.155	-3.289	-1.521	-0.607	0.122	-0.865	-1.508	-1.301	-0.529	-0.787	0.482	-3.07	0.157	0.362	0.761	-0.145	-2.768	0.619	-1.317	-0.482	0.274	0.05	0.88	0.301	0.2	-0.281	-2.168	0.445	-0.77	0.361	0.436	-0.715	-2.28	-0.307	-0.878	-1.468
class-specific genes	206915_at	NKX2-2	-0.2	-2.278	-0.46	-0.407	-2.089	0.423	0.118	0.341	-1.126	-0.05	0.164	-0.604	-0.284	-3.298	0.489	0.155	-2.146	-2.963	1.085	-0.056	-0.632	0.356	-0.05	0.593	0.579	1.36	-1.574	-0.391	-2.115	-2.59	0.141	0.249	-0.769	-0.414	-0.069	-1.736	0.369	0.039	-0.174	-1.665	-1.156	0.336	0.189	-1.932	-0.072	-1.631	0.3
class-specific genes	1555445_at	CA8	-0.555	-1.018	-0.958	-0.763	1.529	1.421	-0.288	-1.311	-0.629	0.242	-0.496	-0.306	-0.848	0.529	-1.964	-1.943	-0.756	0.226	-0.729	-0.783	0.344	-1.141	0.618	1.152	-0.1	-0.649	-0.363	-0.241	-1.344	-0.96	0.114	-0.39	-1.133	-0.537	-0.725	-0.104	0.05	-0.624	-0.831	-1.411	-0.595	-1.699	1.203	0.975	-1.008	-0.515	0.893
class-specific genes	235316_at	NAT8L	0.327	1.083	-1.039	0.387	0.391	-0.014	-0.831	-0.299	-0.525	-0.299	-0.037	-1.311	0.519	0.877	-0.939	1.12	-0.082	0.462	1.12	0.416	-1.702	0.333	-0.78	1.576	0.863	0.331	0.647	0.732	-0.439	-1.57	-0.097	0.707	-1.483	-0.052	0.637	0.055	0.743	-1.468	0.722	-0.726	-0.415	2.051	0.619	1.002	-0.214	-1.273	-0.777
class-specific genes	238441_at	PRKAA2	-2.893	-0.546	-1.241	0.922	0.597	-2.199	-0.841	0.238	1.79	-0.847	-1.693	0.662	-1.425	0.203	-0.488	-0.379	1.561	-3.583	-1.415	-1.423	-0.579	0.3	0.543	-0.284	0.629	-0.119	-1.211	-0.593	0.444	0.909	-2.972	-1.283	-2.838	-1.053	0.783	-1.023	0.032	0.365	-0.183	1.156	0.149	0.21	0.71	0.113	0.058	-0.427	0.836
class-specific genes	240117_at	FBN3	-2.136	-0.739	-0.343	-0.102	-1.063	1.336	-0.02	0	-0.105	-0.007	1.185	-0.594	-1.547	1.439	-0.436	-0.04	0.54	0.596	1.341	0.684	-1.377	-0.698	0.082	0.105	0.216	1.088	-0.059	0.555	-0.123	-0.975	0.15	0.772	-0.445	-0.965	-1.104	-0.34	1.02	-0.211	-0.53	0.906	0.052	2.173	0	-0.027	1.273	-0.498	-0.844
class-specific genes	222797_at	DPYSL5	-0.054	-1.797	1.226	-1.406	2.147	1.066	0.503	1.015	0.641	0.606	-1.158	-1.452	-1.443	-1.736	-1.397	-0.809	-0.252	0.531	-0.078	-0.982	0.346	-0.564	0.501	-0.612	0.411	-0.062	1.543	-1.186	-0.798	-1.202	-0.507	-0.59	-0.59	0.559	-0.781	0.954	-0.236	-1.544	-0.09	-1.122	0.66	-0.654	0.175	0.961	-0.722	-0.718	-1.24
class-specific genes	210508_s_at	KCNQ2	0.139	-0.373	-0.906	0.417	-0.643	0.396	-0.906	0.351	0.775	-0.018	0.022	-1.002	-0.014	-0.395	-0.521	-0.156	-1.44	-0.051	0.635	-1.626	-0.252	-1.166	-0.729	1.367	0.17	0.865	-0.88	0.646	-1.506	-1.838	-0.409	-0.174	0.3	-0.706	1.273	0.433	-0.118	-1.207	0.626	-1.874	0.097	-0.356	-0.059	-0.537	-0.24	-0.604	-1.359
class-specific genes	234475_x_at	CCKBR	-1.343	-3.068	0.147	-0.415	-1.331	-0.058	-1.447	-0.529	-1.195	0.034	-0.761	-2.187	-0.695	-0.141	-1.702	0.391	0.111	0.035	0.225	-0.058	-0.419	-0.23	-1.709	-0.833	0.51	0.527	0.949	-3.155	0.93	-0.56	0.09	-1.666	1.323	0.088	-1.773	-0.197	0.014	0.63	-0.069	-0.441	0.582	-0.049	0.498	-2.837	-0.242	0.093	0.986
class-specific genes	229349_at	LIN28B	-0.317	-0.009	-0.204	-0.045	-0.472	0.346	0.427	-1.041	0.115	0.23	-0.098	-1.159	-1.672	-2.987	-3.728	-2.697	-0.182	-1.349	-0.941	-4.082	-1.923	-0.098	-0.05	-0.775	0.209	-1.825	-0.306	-1.232	-0.459	-2.352	-0.994	1.69	-0.301	-0.308	-0.503	-2.119	0.668	-2.658	0.126	-2.382	-0.182	1.704	0.055	0.711	0.927	-0.084	0.103
class-specific genes	214023_x_at	TUBB2B	0.037	1.89	-0.943	-0.414	0.123	-0.933	0.239	-0.097	0.278	-0.091	0.439	-1.172	-0.534	-0.487	-3.969	-0.569	-2.417	-0.822	0.927	-0.065	-1.894	-0.264	2.555	0.19	0.243	0.787	-0.093	2.587	-0.442	-1.376	-1.108	-0.559	-0.273	-1.118	-1.213	0.054	0.531	0.281	-0.346	-0.92	-0.176	2.23	-0.536	1.389	0.946	-1.743	-0.04
class-specific genes	204260_at	CHGB	-0.627	0.8	0.511	-0.523	-0.707	0.592	0.9	-0.395	0.656	-0.012	-1.775	0.882	-0.037	-0.425	0.658	0.327	-0.231	-0.111	0.002	-0.062	-0.906	-0.465	0.512	0.599	0.674	0.851	-0.905	0.185	-0.249	-1.215	-1.64	-0.526	0.008	-0.178	-1.822	-0.017	-0.173	-1.364	-2.15	-1.008	0.435	0.26	0.33	0.117	0.603	0.503	-0.294
class-specific genes	205751_at	SH3GL2	0.157	0.211	0.284	-0.464	1.286	0.337	0.396	-0.464	-1.774	0.276	-1.021	-0.435	-0.47	-0.827	-0.821	-1.285	-0.843	-2.709	-1.411	-0.598	-3.248	1.399	0.108	-0.131	-2.234	-0.515	-0.871	1.171	-0.604	-2.647	0.003	-0.604	-0.718	0.433	0.141	-0.321	0.271	-0.279	-0.062	-3.251	-1.69	-2.273	0.136	-1.049	-0.401	-2.45	-3.161
class-specific genes	213870_at	COL11A2	0.251	-0.537	-1.481	-1.082	0.691	-2.269	0.416	0.092	0.629	0.168	-2.151	-0.311	-2.061	-0.318	-0.99	-1.389	-0.278	-0.278	-0.261	0.018	-0.574	-0.3	-0.206	0.864	0.397	-0.329	0.469	-0.404	0.118	-1.557	0.298	-0.226	-0.053	0.143	-1.961	1.87	-0.226	0.149	-0.422	-1.755	-2.063	0.691	0.349	-1.306	0.946	0.308	0.889
class-specific genes	205697_at	SCGN	-1.825	-0.549	0.246	-0.011	-0.343	0.319	0.277	-1.347	-0.011	-0.567	-0.37	-1.213	-1.322	-0.077	-0.379	0.957	-1.521	-0.402	-1.539	-1.069	-1.462	0.721	-0.092	-0.135	0.09	0.239	0.143	0.028	0.322	2.144	0.842	-1.376	-0.037	-0.633	1.072	-0.831	0.382	1.595	-0.36	-0.962	-0.09	-0.389	-0.724	-0.344	1.261	-0.621	-0.339
class-specific genes	219170_at	FSD1	0.406	-1.065	0.473	1.798	0.132	1.468	-0.404	1.714	-0.514	-0.925	-0.742	-1.183	-1.298	0.687	-1.283	-0.209	1.538	-1.263	2.937	-0.436	-1.02	0.531	-1.263	0.509	0.339	-0.071	-0.493	-0.987	-0.853	-1.715	0.343	-0.348	0.075	-0.627	0.142	0.136	-0.869	0.403	2.147	0.495	0.07	0.355	-0.339	0.616	0.855	-0.973	-0.367
class-specific genes	206502_s_at	INSM1	-1.058	0.391	-0.299	-0.664	0.218	-0.139	0.494	-1.107	-0.306	0.264	0.065	-0.432	-0.63	-2.727	-1.045	-0.931	-2.024	-0.814	-1.748	-2.147	-0.833	0	-1.014	-0.55	0.517	0.062	0.268	-3.246	0.356	-1.359	0.337	-0.424	0.533	-0.053	0	-0.242	0.37	-0.852	0.038	-1.87	0.289	0.056	0.714	-0.934	-0.239	-2.45	0.791
class-specific genes	205373_at	CTNNA2	-0.632	0.828	0.135	-0.464	1.089	-0.366	-0.075	-0.39	0.558	0.966	0.624	-2.292	-0.355	-2.424	-0.647	-0.379	-1.483	-0.828	-0.436	-1.545	-2.246	0.213	-0.209	-1.777	0.412	0.837	0.365	-0.662	0.884	-2.584	-1.033	0.902	-0.286	-0.103	0.083	-0.041	0.842	-0.167	1.05	0.109	0.465	0.256	-1.042	0.68	1.281	1.861	-0.139
class-specific genes	1555867_at	GNG4	-0.742	-1.122	0.947	1.043	-0.641	-0.231	-0.727	1.347	-1.73	-0.718	-0.367	-0.499	0.295	1.62	1.763	-2.108	-1.404	-2.128	0.017	-1.352	-0.649	0.658	-1.94	1.008	-1.775	1.501	-1.182	-0.747	-0.921	-0.97	-0.001	-1.026	-1.906	-0.87	-2.238	-0.126	0.758	0.203	-0.455	-0.635	1.532	-0.92	0.331	-1.576	0.359	0.15	0.168
class-specific genes	213712_at	ELOVL2	0.069	-1.711	-0.028	-0.647	1.181	-1.182	-1.252	-0.593	-0.485	0.576	-1.905	0.133	-2.994	0.286	-0.398	0.816	0.651	1.366	0.882	-0.368	-1.183	-1.952	-1.583	-0.421	-1.078	0.691	0.242	-0.682	1.193	0.231	0.08	-3.355	0.331	-1.336	0.192	0.347	0.113	-0.187	0.253	-0.492	-0.603	0.16	-1.223	-1.306	-1.199	-0.287	-0.319
class-specific genes	204743_at	TAGLN3	-0.985	0.45	-0.094	-0.032	-0.035	0.568	0.065	-0.122	0.387	-0.011	-2.037	-2.799	-2.227	-0.309	-1.016	0.599	-0.247	0	-0.438	-0.343	-0.24	0.067	-1.102	-0.068	-0.342	1.062	0.938	1.411	0.229	-1.047	-0.104	-0.186	-1.572	0.215	0.475	0.305	0.429	-0.645	0.774	-0.559	-1.147	0.322	-0.126	-0.47	0.633	-0.351	0.677
class-specific genes	241895_at	LOC440905	-0.828	-1.513	-0.478	-2.704	1.094	0.433	0.096	-0.446	0.904	-0.011	-0.043	-1.87	-1.072	-0.717	-2.163	0.343	0.778	-3.311	-1.223	1.983	-0.936	0.2	0.825	0.464	0.607	1.311	-0.082	-3.644	0.235	-2.426	-0.989	-1.373	0.808	0.745	-0.186	1.326	0.2	-3.289	-0.051	-0.903	-0.348	-0.029	1.555	1.497	-0.758	0.181	0.263
class-specific genes	225815_at	CPLX2	-1.961	-1.88	-1.138	-0.985	-0.189	-0.716	0.925	-0.019	1.777	1.142	1.163	-0.393	-1.357	-0.575	-1.462	0.676	-0.039	-0.801	-1.252	0.373	-2.266	0.815	1.164	-0.447	0.203	0.795	-0.187	-0.254	0.688	-1.225	-1.217	0.105	-0.319	-0.611	0.448	0.943	0.838	0.907	0.733	-1.799	-0.322	0.979	1.256	-0.927	0.526	2.204	-0.548
class-specific genes	226086_at	SYT13	-1.222	0.969	-0.442	-0.927	-1.091	0.635	0.702	0.088	-0.632	1.308	0.945	-0.233	0.07	0.001	0.478	-0.012	-0.66	-0.277	1.102	0.851	1.18	0.304	0.91	-0.459	-1.323	0.713	1.282	-0.068	-0.836	-2.218	0.938	-0.648	1.613	-0.349	-0.113	0.074	0.31	-1.612	0.425	-0.428	-0.089	1.891	0.84	0.077	0.507	0.534	-0.937
class-specific genes	205972_at	SLC38A3	0.227	1.935	-0.697	1.815	1.72	1.963	1.751	0.825	-0.497	-0.995	-1.439	-0.394	-0.764	-0.183	-1.395	-1.11	0.932	-1.771	1.014	0.789	0.643	0.259	-0.631	1.403	0.884	0.008	0.735	0.279	0.748	-0.376	-1.674	-1.745	-0.787	-1.373	-0.522	-1.967	0.266	-1.101	0.69	-1.266	-0.27	-0.284	0.715	0.933	1.001	0.121	-1.54
class-specific genes	xxx	NA	NA	NA	NA	NA	NA	NA	NA	NA	NA	NA	NA	NA	NA	NA	NA	NA	NA	NA	NA	NA	NA	NA	NA	NA	NA	NA	NA	NA	NA	NA	NA	NA	NA	NA	NA	NA	NA	NA	NA	NA	NA	NA	NA	NA	NA	NA	NA
class-specific genes	234908_s_at	DSCAML1	-0.16	-0.366	2.287	1.268	1.828	-1.077	-0.978	-0.168	2.408	1.097	-0.701	0.648	-0.393	0.157	1.671	1.989	-0.043	-0.126	-0.582	-0.174	-0.134	-1.012	-1.069	1.419	0.622	-0.259	-0.175	0.558	-1.026	-1.083	1.849	1.638	-0.146	-0.256	-0.242	1.385	-0.471	0	1.241	0.393	0.205	0.094	1.035	0.223	-0.285	-0.596	-0.243
class-specific genes	217250_s_at	CHD5	-1.168	0.77	0.991	-0.599	1.299	-0.535	-0.847	-0.784	0.419	0.286	0.58	-1.065	0.411	1.155	0.003	0.208	-2.403	0.047	0.708	0.451	-0.208	-1.047	0.291	1.007	0.217	-1.334	0.866	-0.541	0.695	-1.728	-0.764	-1.054	-0.669	-1.378	-0.111	1.512	0.482	-0.698	-1.359	0.047	0.82	-1.19	1.709	-1.713	0.943	-0.536	-0.054
class-specific genes	224299_x_at	FTCD	-1.318	0.809	0.704	1.582	-0.235	1.626	-1.127	-0.721	2.049	0.2	-1.064	-2.136	-1.661	0.327	-1.495	0.831	-0.852	-2.036	-1.115	-1.423	0.292	0.473	0.726	-0.042	-1.13	-1.872	0.256	-0.519	0.304	0.926	-0.826	-0.849	1.832	-0.918	-0.504	1.151	0.415	1.343	0.634	-1.079	1.201	-0.393	0.116	1.245	0.028	1.309	-0.242
class-specific genes	210727_at	CALCA	-1.47	-1.035	-0.524	-0.969	0.822	-1.135	-0.632	0.691	0.439	-0.969	0.803	0.567	0.781	0.851	0.232	0.387	0.647	0.527	0.199	-1.53	0.516	-0.252	-0.354	0.226	0.963	-0.315	1.535	1.394	1.392	-0.975	-1.319	0.892	-0.047	-0.121	-1.12	-1.523	1.547	1.588	1.357	0.572	0.229	-1.694	1.056	-1.23	-0.006	0.652	-1.302
class-specific genes	223529_at	SYT4	-0.422	-0.009	-0.291	-0.136	0.272	0.237	-0.549	-0.767	-0.05	-1.021	0.943	-0.498	-1.325	-0.388	-1.427	0.25	-1.322	-1.527	-0.134	-0.495	-1.24	-0.033	-3.202	-0.068	0.967	1.291	0.629	-1.266	0.534	-0.793	-0.403	0.008	0.484	0.288	0.102	0.046	0.103	0.648	0.923	-2.645	-0.157	1.51	-0.691	-0.862	-0.498	-0.052	-0.435
class-specific genes	223726_at	KCNH3	-0.469	-1.506	0.049	0.67	1.898	-0.425	-0.684	0.393	-0.258	-0.258	-1.255	-0.984	-2.207	-1.877	-1.57	-0.919	-1.781	-2.342	-2.201	-0.228	-2.322	0.796	0.674	-1.018	0.351	-0.419	-0.722	-1.403	-1.301	-0.525	-1.829	0.848	0.054	-0.925	-1.946	-2.661	1.1	0.762	-0.358	-1.402	-1.246	1.788	-1.051	0.391	0.86	-1.255	0.659
class-specific genes	242410_s_at	CACNA1E	-0.249	-0.516	0.442	-0.084	-0.98	0.436	-2.538	-0.141	0.709	-0.358	0.182	-1.609	-0.379	-0.56	-1.149	0.069	-0.554	-0.494	-0.834	-0.227	-0.652	-0.246	0.332	-0.526	0.327	0.461	0.776	-0.179	0.022	-0.957	-0.605	-0.397	0.804	0.189	-2.236	0.508	1.272	-1.204	0.413	-2.212	0.406	0.245	0.446	0.594	0.26	1.041	-0.594
class-specific genes	1570250_at	RP11-35N6.1	-1.28	-0.228	-1.398	-2.41	-2.273	-1.721	-0.822	-0.341	-0.718	-0.038	0.59	-2.052	-1.661	-1.235	0.096	0.184	0.18	-0.745	0.026	0.002	-0.079	-0.627	-0.032	0.291	-0.21	0.162	0.739	-1.912	0.445	-0.676	-0.582	-0.042	-1.82	-1.936	0.2	0.183	0.552	1.289	-0.493	-0.349	-2.715	0.499	-1.148	0.301	0.127	0.604	0.619
class-specific genes	213148_at	C2orf72	-0.493	1.636	1.118	0.825	0.937	0.523	0.689	-0.166	0.468	-0.056	-0.243	0.2	0.156	-0.504	0.138	-1.136	-1.587	0.17	1.432	0.172	0.745	0.165	1.074	-0.876	-1.97	0.526	-0.027	-0.673	0.116	0.753	1.035	0.187	1.252	-1.698	0.202	-0.273	-0.762	0.885	-0.496	-0.714	0.372	-0.579	0.452	1.075	1.163	-1.559	-1.155
class-specific genes	209618_at	CTNND2	-1.339	-1.065	-1.476	1.226	-0.651	-1.691	-0.317	-1.619	0.42	0.122	-1.037	-1.314	-0.009	1.074	-1.352	-0.252	-1.764	-1.993	-0.136	-1.719	1.456	-1.32	-0.799	1.646	-0.314	-0.355	1.245	0.394	-0.081	-1.387	-2.222	0.211	0.565	0.729	-1.173	-1.15	-0.063	0.915	-0.219	-1.121	-0.28	0.904	-0.631	-1.284	-0.364	-0.272	-0.336
class-specific genes	229448_at	LASS1	-0.909	1.287	0.169	-1.566	-0.067	-1.065	-0.434	-1.336	0.392	0.813	1.666	-0.618	-0.286	1.403	-0.429	-1.139	-0.335	0.593	0.564	1.506	-0.5	-1.178	0.621	-0.213	-0.338	1.85	0.431	-1.063	-1.561	-1.522	-0.681	-1.125	0.136	-0.026	-0.946	1	0.187	1.869	1.594	-0.508	0.406	-0.891	-0.041	-0.426	1.179	1.347	0.064
class-specific genes	205311_at	DDC	0.519	-0.097	0.478	0.437	-0.141	0.384	0.293	0.331	0.056	-0.831	1.127	-0.011	0.329	0.067	0.399	-0.635	-0.745	-1.141	-0.244	1.471	-0.317	0.165	0.894	0.568	0.865	0.718	0.428	-0.39	-0.167	0.949	2.101	0.998	1.829	0.145	-0.329	0.011	-0.984	0.573	0.481	-0.599	0	-0.627	1.984	-1.422	-1.221	-1.437	-0.421
class-specific genes	209462_at	APLP1	-1.017	-0.198	0.053	-0.097	2.795	1.087	-0.479	-0.45	-0.244	0.48	0.053	-1.128	-0.518	2.119	-0.747	-0.1	-1.09	-0.739	0.678	1.185	0.145	-0.71	2.356	0.485	0.446	0.385	0.6	-0.33	0.961	1.449	-0.732	-0.004	-0.907	0.545	1.412	-0.773	1.213	0.243	1.541	-1.386	-0.139	1.948	2.119	0	-0.596	-0.262	0.679
class-specific genes	230863_at	LRP2	-0.184	-1.749	-0.547	0.203	0.389	0.609	0.467	-0.714	0.976	0.647	0.738	-1.459	-0.79	-1.546	0.085	0.049	0.904	-0.555	0.272	0.239	-1.007	0.037	0.217	0.453	-0.111	0.585	-0.311	-0.286	-0.006	0.359	-0.926	-1.164	-0.443	0.112	-1.533	-0.23	1.66	1.236	1.693	0.231	-0.178	0.431	0.354	1.035	-0.78	-1.539	1.523
class-specific genes	226623_at	PHYHIPL	-1.46	-0.41	-0.286	0.657	0.312	0.387	0.637	-0.528	-0.082	-1.738	0.097	-0.52	1.389	-1.274	1.019	-1.607	-1.938	-1.122	-0.145	-1.483	-0.655	1.255	0.101	-0.021	0.578	0.184	-0.005	1.746	-0.68	1.11	-1.226	-0.215	-0.337	0.905	-0.451	-0.474	0.369	-0.73	-0.288	2.635	0.176	0.284	0.478	-0.329	0.965	-1.07	1.216
class-specific genes	208221_s_at	SLIT1	-1.678	-1.331	-1.437	-0.053	0.205	-0.685	0.847	0.529	0.869	0.138	0.583	-0.708	-0.263	0.616	0.289	0.818	-0.423	0.168	0.435	-1.69	0.514	0.97	1.027	-0.303	1.72	1.578	0.912	0.801	0.778	-0.085	-1.183	-1.197	0.909	-0.852	0.81	0.822	0.181	1.16	0.546	-0.189	0.925	-1.21	-0.028	-1.33	0.658	0.245	0.666
class-specific genes	207142_at	KCNJ3	-0.815	0.297	0.646	1.41	-0.471	1.573	1.326	-1.484	-1.393	-1.102	1.514	-2.301	0.782	0.535	-0.017	-1.162	-0.763	1.855	1.313	-1.175	-1.218	-0.061	-0.048	0.543	0.483	0.105	-0.093	-0.016	-0.016	0.487	1.198	-0.086	1.08	-0.721	0.832	0.262	-0.307	1.329	-0.825	0.119	0.098	-0.239	1.989	-0.314	0.586	-0.586	-0.289
class-specific genes	206333_at	MSI1	-1.104	1.155	0.904	-0.907	0.478	1.759	-0.452	0.869	0.626	-0.412	2.023	-0.806	-0.848	2.022	0.91	-0.375	-0.653	-0.982	-1.01	0.149	-0.891	-0.682	1.592	2.083	2.512	2.707	-0.015	1.044	1.599	-1.009	-1.28	1.176	-0.456	-1.169	0.124	1.746	-0.776	1.804	0.515	-0.262	1.961	-0.389	0.582	1.788	-1.073	0.142	-0.301
class-specific genes	206489_s_at	DLGAP1	-2.297	0.025	-0.038	0.52	-1.135	0.286	0.548	-0.533	0.491	0.245	0.706	-1.671	-0.782	-1.065	-0.287	0.833	-0.35	-0.059	0.192	-1.799	-0.032	0.214	-0.605	1.1	-1.032	0.873	-0.454	1.994	-2.047	-1.494	-2.687	-0.673	-0.469	-1.79	-1.651	0.468	0.168	-1.567	-0.455	1.036	0.367	-0.002	0.276	-0.043	0.857	0.663	-1.526
class-specific genes	231609_at	C10orf82	-0.782	0.197	-0.04	0.029	-0.678	0.401	-0.468	1.317	0.79	-0.77	-1.257	0.931	-0.664	-0.945	-1.891	0.468	-0.927	-0.13	-0.286	-1.622	-0.437	1.059	-0.821	0.522	-0.913	1.609	0.692	1.058	0.441	-0.148	-0.47	0.425	0.858	0.316	-0.074	0.014	-0.216	0.363	-0.431	-0.062	0.817	0.447	-1.125	0.746	1.43	-0.594	-0.309
class-specific genes	205586_x_at	VGF	-0.993	-0.245	-0.462	0.263	1.188	0.779	0.623	0.911	0.082	-0.988	0.8	0.035	-1.106	0.195	0.039	0.471	-0.905	-1.256	-0.194	0.145	-0.793	0.694	-0.327	0.427	1.516	1.419	0.354	-1.006	0.43	-0.896	-0.75	-0.055	0	0.041	0.615	0.977	-1.222	1.354	0.482	-0.823	0.779	-0.178	0.719	-0.26	-0.394	0.164	0.654
class-specific genes	205970_at	MT3	-0.081	-1.779	0.955	-1.273	-0.169	0.023	0.252	0.392	0.5	-0.742	0.027	0.738	-2.652	-1.358	-1.319	-0.131	-0.755	-0.509	-0.406	-0.332	-0.536	-0.135	0.942	1.553	1.329	0.77	0.179	-0.624	2.552	-2.062	-0.365	-0.775	0.092	0.223	0.119	0.385	-0.713	-1.821	0.167	-0.737	0.202	-2.038	-2.778	0.42	0.592	0.124	-1.519
class-specific genes	205719_s_at	PAH	0.292	-0.853	1.775	1.262	0.148	0.225	-0.9	0.262	0.051	-0.046	0.01	1.599	-1.297	-1.666	0.51	-0.185	0.941	-1.192	-0.133	-0.277	-1.001	-0.856	0.593	-0.724	0.308	0.929	0.747	-0.081	0.288	0.898	-0.242	-0.298	0.567	-1.268	0	0.419	0.529	-1.714	-0.614	-0.993	0.597	0.157	0.485	-1.235	-1.923	2.084	0.468
class-specific genes	217404_s_at	COL2A1	-1.301	0.888	1.348	-0.746	0.454	-0.217	-0.015	-0.76	-0.971	-0.935	-0.171	-0.918	-0.867	1.108	-1.028	-0.639	-1.481	0.85	0.317	-1.073	-1.236	0.046	-0.56	0.9	-0.085	2.5	0.787	-0.436	-0.395	0.734	-1.069	0.038	-0.003	-0.854	0.361	0.399	-0.356	0.495	-1.034	-1.499	-0.279	-0.428	-0.303	-0.623	-0.095	0.367	0.473
class-specific genes	206228_at	PAX2	-0.825	0.031	-0.935	-0.037	0.478	-0.273	0.062	-2.42	0.419	0.539	0.408	-1.702	-1.196	-0.676	-0.949	0.337	-0.951	-0.027	1.423	0.723	-0.3	0.533	-0.083	0.446	0.567	-0.064	-0.051	-0.432	0.257	0.908	-0.572	-0.299	-0.054	0.567	-0.29	-0.152	-0.044	-0.834	0.91	-2.832	0.444	0.273	1.499	-0.018	0.114	0.092	-0.099
class-specific genes	223761_at	FGF19	-0.846	2.489	-0.685	0.972	-0.058	0.001	1.355	-0.516	0.771	0.294	-0.335	-0.332	-1.38	0.579	-1.528	-0.124	-0.264	-2.121	-1.146	-1.222	-0.843	-0.431	-0.01	0.288	0.245	0.423	0.068	-0.035	-0.634	0.443	-0.254	0.221	1.448	-0.66	-0.044	-0.24	0.082	0.58	0.378	-1.007	0.268	-0.843	0.198	1.034	2.457	2.166	0.671
class-specific genes	231325_at	UNC5D	-1.505	0.643	-0.339	-0.318	-1.315	0.601	0.841	-0.21	-0.863	-1.455	-0.39	-0.727	-0.95	-2.272	-0.557	0.038	-0.679	-0.897	0.323	-3.027	-3.065	-0.042	-2.412	-1.803	-1.336	0.729	-1.72	-0.019	-0.171	0.695	-0.124	-0.401	-1.132	0.217	0.319	-0.871	-1.059	-0.776	-1.336	-1.729	-0.56	0.42	-0.086	-0.534	-1.446	-1.603	0.506
class-specific genes	204971_at	CSTA	-0.609	-1.226	-1.334	-0.148	0.156	-0.797	-0.012	-0.165	0.235	-0.467	-0.157	-1.328	-1.656	0.455	-0.285	1.459	-0.903	2.585	-0.476	-0.624	1.494	-0.149	0.618	-0.558	0.811	0.442	0.464	0.946	0.037	-0.631	1.072	0.287	0.334	0.446	0.04	1.908	0.567	0.491	-1.262	2.714	1.427	1.273	-0.159	-0.367	-0.683	1.259	0.792
class-specific genes	210118_s_at	IL1A	0.503	-0.854	-0.52	0.221	0.609	-2.255	0.409	-1.004	-1.278	0.544	-0.298	-0.807	1.136	-0.403	-0.471	-1.097	-0.393	0.588	-1.228	0.233	-0.191	-0.714	0.472	0.554	-0.597	-0.495	-1.685	0.99	0.878	-1.36	0.732	-0.805	0.24	-0.554	0.461	1.052	0.216	-0.737	-0.003	-0.171	0.13	0.754	-1.033	-1.567	0.242	-1.298	0.956
class-specific genes	204268_at	S100A2	1.037	1.068	-0.567	0.131	-0.381	0.478	-0.629	0.559	-0.027	0.356	-0.196	-0.592	-0.143	0.768	-0.705	-0.512	-0.574	-0.821	-0.54	0.443	-1.409	0.849	0.974	0.549	0.424	0.042	0.125	0.774	0.346	-0.703	-0.958	-0.117	-0.898	-0.522	1.085	0.068	0.678	-0.366	-0.064	0.468	1.587	0.651	0.286	1.245	0.171	-0.404	1.361
class-specific genes	209260_at	SFN	0.478	0.556	0.613	0.2	0.56	0.541	0.819	-0.311	0.571	0.239	1.035	1.167	1.189	0.574	0.218	-0.366	0.649	0.127	-1.21	0.001	1.042	0.845	2.552	0.645	-0.567	0.821	-1.021	-0.547	0.599	-1.385	1.189	0.312	0.895	-0.501	1.29	-0.509	-1.457	-0.301	0.505	0	1.032	0.13	-0.304	0.302	0.888	1.145	0.58
class-specific genes	212657_s_at	IL1RN	-0.367	-0.841	0.272	1.018	1.933	-0.668	1.224	-1.043	0.823	0.516	0.1	-0.512	0.029	0.182	0.096	-0.26	2.428	-0.025	0.184	0.701	0.483	0.422	-0.566	-0.244	-0.044	0.534	-0.017	0.257	-1.01	-1.786	1.979	-0.56	1.346	-0.024	0.126	1.156	-0.126	-0.75	-1.054	0.561	0.028	0.97	-0.464	0.637	-0.15	0.332	1.294
class-specific genes	220475_at	SLC28A3	0.011	0.446	-0.633	-0.512	0.802	0.08	0.974	-0.544	-0.465	-1.77	0.745	-0.913	-0.265	-4.856	-0.55	-0.745	0.545	-1.539	-1.162	-0.86	-0.622	0.252	-3.367	0.413	0.825	-2.912	-1.106	-0.014	-0.399	-1.857	-1.253	0.034	-0.794	0.143	-0.075	1.628	0.72	1.804	0	-0.951	-1.192	-0.504	-0.162	-0.879	-1.797	-0.46	1.68
class-specific genes	219630_at	PDZK1IP1	0.701	-0.304	0.858	0.123	-0.07	0.358	0.38	0.524	0.895	0.13	0.627	0.597	0.441	0.462	0.786	0.303	1.101	-1.378	0.139	-0.74	2.656	0.348	1.031	0.547	0.496	0.548	0.088	1.377	-0.047	0.778	1.971	0.795	0.806	-0.141	1.361	0.316	0.044	0.392	0.148	0.766	-1.776	0.05	1.565	-0.064	0.457	0.611	0.86
class-specific genes	241994_at	XDH	-0.118	0.662	0.445	0.171	-0.944	0.622	1.336	0.294	1.399	0.024	0.556	1.093	1.222	0.854	1.17	0.368	2.839	-1.299	0.167	0.382	0.825	0.217	1.559	-1.309	-1.254	0.188	0.439	0.023	0.213	-0.869	1.343	-0.562	1.48	0.218	1.754	0.547	0.122	-1.254	-2.143	-1.589	-0.364	0.153	-0.433	-0.888	0.111	0.764	1.289
class-specific genes	202286_s_at	TACSTD2	1.074	0.004	-0.655	-0.236	-1.427	0.997	0.86	0.011	0.399	-0.487	-1.465	0.583	1.371	1.56	-0.993	0.313	0.305	0.398	0.94	0.713	0.512	1.341	1.304	1.277	-1.929	0.002	-0.449	1.132	1.272	-0.162	0.537	-2.097	0.316	-0.843	1.212	0.209	0.587	0.154	-3.449	0.09	0.363	-0.376	0.111	0.244	0.225	0.343	0.525
class-specific genes	234305_s_at	GSDMC	-0.812	-0.165	0.244	0.222	1.184	0.235	-0.368	-0.777	-0.111	-0.77	-0.611	-2.403	-1.408	-7.438	-1.827	-0.576	-0.59	-1.438	-1.237	-0.696	1.008	-0.336	0.125	0.874	-0.001	0.825	0.017	-1.589	-0.723	-1.165	-0.058	1.015	0.138	1.918	-0.813	1.832	0.473	1.703	0.093	0.984	0.949	0.759	-1.919	-0.783	0.385	-0.734	0.721
class-specific genes	205863_at	S100A12	-1.623	-2.992	0.25	0.261	0.97	0.395	-0.677	-0.764	0.685	0.11	0.287	-1.731	-1.065	-0.817	-3.335	-0.83	-0.203	-1.947	0.444	0.526	-0.166	-1.555	0.23	-0.195	-1.89	0.369	0.935	0.49	-0.4	-0.645	1.715	-0.216	0.352	-0.177	-0.007	1.963	-2.219	1.062	-0.839	-1.395	-0.67	-0.175	-0.519	0.518	-0.252	2.51	0.144
class-specific genes	223540_at	PVRL4	-0.976	-0.094	0.39	1.108	0.074	-0.318	0.449	-0.008	0.745	-1.94	0.727	0.245	-0.063	0.336	0.374	0.005	-0.426	-0.369	-0.014	1.13	1.048	0.163	-0.446	0.06	-0.422	-0.479	-0.555	-0.988	-0.308	0.1	0.264	-0.848	-0.006	-0.188	-1.475	1.035	1.321	1.547	-2.508	-2.42	0.266	0.15	0.114	-0.427	0.11	0.586	0.241
class-specific genes	1553605_a_at	ABCA13	-0.351	0.214	-0.489	-0.062	-0.006	0.428	-0.891	-1.255	1.656	-0.223	-1.2	-0.766	-0.035	-1.086	-1.071	-1.376	-1.704	-1.965	-1.116	-0.299	-1.315	-1.202	-0.958	-0.396	-0.522	1.017	0.459	-1.401	-0.311	-0.094	-2.45	-1.596	0.367	-0.364	0.328	-1.878	0.53	-0.261	-1.155	0.767	1.394	0.887	0.212	-1.6	-0.09	1.181	1.151
class-specific genes	xxx	NA	NA	NA	NA	NA	NA	NA	NA	NA	NA	NA	NA	NA	NA	NA	NA	NA	NA	NA	NA	NA	NA	NA	NA	NA	NA	NA	NA	NA	NA	NA	NA	NA	NA	NA	NA	NA	NA	NA	NA	NA	NA	NA	NA	NA	NA	NA	NA
class-specific genes	1564307_a_at	A2ML1	-0.646	-1.92	-1.432	0.465	-1.459	-0.28	-0.056	-1.61	-1.25	0.733	0.415	-0.669	-3.018	-0.085	-1.826	-0.051	-0.405	-1.364	-0.529	-0.015	-0.099	-0.686	-0.385	0.356	-1.42	0.929	0.656	-1.23	0.382	-0.694	-0.941	0.652	-0.408	-0.797	0.124	-1.686	0.434	1.171	0.399	1.063	-0.016	0.285	1.098	-0.736	0.174	-0.191	0.26
class-specific genes	229927_at	LEMD1	0.611	0.226	-1.105	-1.326	0.308	-0.135	-0.506	-0.043	1.025	-0.38	0.689	-1.526	-0.831	0.466	-1.234	-0.056	-0.262	-1.948	0.005	0.134	-0.34	-0.26	0.399	-1.573	1.002	1.463	0.179	-0.142	0.956	-1.016	-1.244	-0.118	-0.03	0.774	1.356	1.197	0.784	-0.416	-0.323	-1.112	0.438	2.547	1.893	0.909	1.583	0.632	1.346
class-specific genes	206498_at	OCA2	0.816	0.185	-0.116	-0.608	0.921	0.21	-2.046	-0.112	0.953	0.027	-0.526	0.275	-1.199	0.317	-0.279	-1.138	-0.161	-0.197	-0.803	-1.536	-2.711	0.164	0.491	0.581	-0.37	0.618	1.139	-1.891	1.142	-0.916	-1.365	0.786	-0.226	-0.493	-2.529	0.57	0.193	0.397	0.021	-2.9	-0.729	0.958	0.723	-0.662	0.489	-0.471	0.179
class-specific genes	1552390_a_at	C8orf47	-0.334	1.26	-1.487	-2.237	1.329	0.513	0.437	0.41	-0.106	-1.13	-2.56	1.638	-0.317	-0.606	0.484	-1.297	-1.663	0.632	-2.546	-1.799	-1.115	-1.885	-0.42	-0.394	0.686	-0.332	-2.373	0.055	-1.227	1.103	1.577	-0.225	1.123	1.09	-1.876	0.403	0.712	1.144	-1.718	1.27	0.193	0.948	0.754	0.466	-0.593	-1.02	0.323
class-specific genes	230977_at	NPM2	-1.278	0.837	0.3	-0.767	1.832	-1.716	0.909	-1.72	-1.658	0.512	-0.355	-0.429	-1.326	-1.97	-0.34	0.134	0.057	-1.137	-0.641	-0.236	0.838	-0.363	-0.132	-0.044	-1.489	1.486	-1.434	1.365	0.459	-0.086	0.463	0.227	-0.276	-0.794	0.323	0.172	-0.15	0.472	-1.259	-0.296	0.463	0.628	0.008	0.414	0.362	-0.842	0.395
class-specific genes	210074_at	CTSL2	-1.071	0.055	-0.103	1.403	0.454	0.878	-0.905	-0.844	-2.098	0.753	-1.073	-0.462	-2.152	0.386	0.539	-0.423	-0.574	-0.219	-0.162	-0.12	0.866	1.189	-0.196	0.438	-0.265	-3.724	0.101	0.525	-0.313	-0.086	-0.302	-1.064	-1.841	0.671	0.043	0.148	-1.02	0.435	-0.601	2.247	1.97	-0.269	-0.814	0.628	-0.737	-0.322	0.967
class-specific genes	207366_at	KCNS1	-0.592	-0.183	0.162	-0.951	-1.478	0.684	0.297	-0.15	1.017	-1.91	-0.026	-2.211	-1.197	-0.71	-0.357	-0.032	-0.55	-0.135	-0.218	-0.931	0.418	0.118	2.769	-0.007	-0.335	0.668	-0.58	1.15	-1.306	-1.004	0.008	0.123	0.126	1.185	0.195	1.319	-0.153	0.657	-1.144	-0.286	-0.89	1.094	-1.306	-0.365	0.306	-0.724	-1.133
class-specific genes	214595_at	KCNG1	-1.702	-1.33	0.689	1.373	-0.607	-0.205	0.583	1.822	0.48	0.689	0.15	-1.753	-1.745	0.75	0.181	0.294	-1.354	-1.387	-1.549	0.12	-1.314	0.213	0.732	-0.321	1.07	-0.539	0.694	-1.019	0.775	-2.036	-0.427	0.057	-1.265	0.505	0.293	0.759	0.545	0.894	1.239	0.756	1.788	0.672	0.387	0.031	0.333	-1.713	0.727
class-specific genes	218796_at	FERMT1	-0.461	0.195	0.165	-0.088	-0.176	-0.061	-0.082	0.617	-0.145	0.483	-0.596	-0.844	0.354	0.051	0.001	-0.082	-1.478	-1.093	0.09	0.042	-1.039	-1.087	0.617	0.039	-1.17	1.025	-0.89	0.367	-0.581	0.732	1.69	0.466	1.328	-0.291	-0.51	-0.174	-0.44	-0.061	-2.34	-0.47	0.227	-1.121	-1.908	1.29	0.488	1.407	-0.202
class-specific genes	1564339_a_at	CHRM3	0.091	0.539	0.219	-0.07	-1.322	-2.096	-2.495	-1.512	-0.93	-2.016	-1.004	-0.561	-0.798	0.083	-0.166	-0.429	-0.668	-0.943	-1.194	-1.643	-1.61	-0.049	0.102	-0.049	-1.203	-0.236	-0.314	-1.504	0.915	1.24	-1.572	-1.443	-0.028	-1.381	-0.378	-0.512	-0.063	0.748	-0.599	-1.816	1.216	-1.072	1.226	0.512	0.583	-0.808	1.017
class-specific genes	233562_at	MGC16291	-1.028	-1.107	0.983	-0.773	0.905	-1.044	-0.446	0.099	-0.915	1.267	0.195	-1.219	-0.385	1.168	-0.641	-0.733	-1.451	-2.16	-0.32	-1.325	-1.363	-2.053	0.377	-1.548	0.595	0.169	0.247	-2.924	0.488	0.168	0.101	0.65	-1.415	1.208	-1.405	0.485	-0.733	-0.284	0.868	1.878	-0.761	1.147	-0.345	-0.82	0.931	-0.375	-0.935
class-specific genes	206999_at	IL12RB2	-0.465	-0.757	-0.423	-0.197	0.929	0.735	0.645	-1.18	-0.48	-1.535	0.754	-2.743	-1.855	0.272	-1.38	0.197	-1.107	-0.91	-0.866	-1.007	-1.323	-0.005	0.824	0.718	0.553	0.282	-1.254	1.444	0.044	-1.29	-1.191	-0.202	0.054	-0.106	0.029	0.139	0.681	-0.236	-0.994	-0.543	0.426	-0.734	0.704	0.832	0.173	-1.261	-0.213
class-specific genes	239492_at	SEC14L4	-1.35	0.142	-0.947	-0.745	0.041	0.159	-0.026	-0.307	-0.42	-0.338	-0.822	-1.62	-1.324	-0.33	-1.233	-1.353	-0.752	-0.874	-0.567	-0.959	-0.834	-2.322	0.19	-0.744	1.568	1.682	-0.352	-2.082	-0.193	-0.744	-0.266	0.735	-0.185	-1.828	1.68	1.169	0.641	-0.56	1.853	-0.518	0.637	0.148	-0.571	0.344	1.413	-0.506	1.006
class-specific genes	203819_s_at	IGF2BP3	0.874	0.827	0.95	-0.303	-0.879	-0.356	0.173	1.691	-0.173	0.877	1.471	-2.371	-2.929	1.099	-2.944	-1.182	-0.353	-1.563	-0.16	-2.327	-2.614	-0.497	1.579	-1.621	-0.953	0.412	-0.549	-2.04	0.16	-1.871	1.301	-0.677	0.439	-1.381	-0.898	-0.225	1.145	-1.066	-0.479	-1.813	1.206	1.9	1.733	0.595	0.676	0.855	-0.581
class-specific genes	226907_at	PPP1R14C	0.078	-0.389	0.837	0.228	-0.042	0.066	0.243	0.881	-1.536	0.762	-1.342	1.288	1.306	0.563	0.46	-0.123	-1.986	-0.703	-1.634	0.623	1.75	-0.273	0.441	0.167	-1.406	0.776	0.726	-0.111	-0.41	1.286	-0.962	0.771	-0.527	0.599	-1.166	0.313	0.991	0.673	-0.54	-0.493	0.039	0.762	0.993	-0.3	-0.114	0.186	1.447
class-specific genes	204401_at	KCNN4	1.793	-0.11	-0.464	0.563	1.453	0.242	-0.589	0.272	0.981	1.317	-0.427	-0.554	0.721	1.394	1.146	0.382	-0.402	-1.497	1.088	1.429	1.307	0.136	-2.043	0.119	0.157	1.464	-1.391	-0.075	0.971	-1.902	0.456	-2.118	1.128	-0.47	1.035	-0.517	1.401	0.015	-2.512	-1.302	-0.727	0.558	0.278	0.947	0.505	0.859	0.388
class-specific genes	204885_s_at	MSLN	0.543	0.234	-0.041	-0.507	2.204	-0.308	0.89	0.289	1.603	1.939	0.743	1.254	2.094	2.34	0.505	0.49	-0.357	0.031	-1.322	-0.862	-1.317	0.039	2.853	-0.32	0.636	-0.158	0.162	0.468	-0.089	2.532	-0.374	0.767	0.522	0.367	0.194	0.664	0.797	0.759	0.68	0.554	-0.496	2.373	1.481	1.69	0.329	0.377	0.764
class-specific genes	220559_at	EN1	-0.561	-0.123	0.134	-0.799	0.388	-0.003	0.254	-0.464	0.479	0.314	0.321	-1.337	-0.71	-0.324	-0.19	-0.636	-0.484	-0.745	-0.674	0.818	0.434	-1.244	-0.49	0.698	0.406	1.18	-0.061	0.044	-1.69	-1.967	-2.286	-0.112	-1.69	0.491	0.724	-1.886	0.306	1.444	-0.334	-0.997	0.359	-0.957	0.674	-0.153	0.889	-1.147	-0.862
class-specific genes	219867_at	CHODL	-1.572	-0.091	0.365	0.134	-0.288	0.845	-1.306	-1.106	-1.516	0.559	-1.139	-0.448	-0.487	-2.354	-1.095	-1.483	-0.64	-2.651	-0.503	0.029	-2.253	0.855	0.203	-1.339	-1.844	1.089	0.375	-0.942	0.704	-0.57	-2.816	1.051	-2.448	0.768	0.319	0.694	0.793	0.729	0.53	1.102	1.821	1.223	-0.025	1.506	0.305	0.407	-0.299
class-specific genes	220446_s_at	CHST4	0.943	-0.099	-0.124	-0.336	0.485	-0.515	0.484	-0.374	0.211	-2.629	-0.114	-1.634	2.509	-1.264	-1.779	-1.938	-0.836	-2.362	-1.281	-0.91	-0.28	-0.078	0.092	-0.142	0.359	0.434	0.984	-1.341	0.54	-2.107	2.306	0.452	1.935	-0.033	0.124	1.955	1.633	1.598	-1.16	2.913	-0.873	-0.529	0.263	-0.165	0.182	-0.806	1.686
class-specific genes	221609_s_at	WNT6	0.222	-0.057	-0.431	-0.175	-0.522	0.253	0.853	0.834	1.149	-1.702	0.614	-2.048	0.046	0.161	-1.402	0.838	-2.07	-0.903	0.222	0.055	-0.035	-0.96	0.651	1.04	0.406	0.991	0.346	0.555	0.113	-0.41	-1.107	0.043	0.698	-1.338	-1.082	0.527	0.576	0.956	-1.07	-0.71	-1.148	0.754	1.273	0.185	1.947	1.818	-0.904
class-specific genes	229944_at	OPRK1	-1.299	0.497	-1.673	-1.476	1.907	0.221	0.632	-0.016	1.051	-0.78	-0.804	-0.269	-2.854	-2.256	-1.581	0.187	-0.552	-1.296	-0.939	-0.369	-2.378	0.003	-2.519	0.328	0.212	1.426	-0.461	-0.647	0.209	-1.493	-0.522	-0.677	-0.558	-0.511	-0.281	-0.258	0.04	1.063	-0.194	-0.653	0.77	0.554	0.921	-1.049	0.105	-0.08	0.365
class-specific genes	xxx	NA	NA	NA	NA	NA	NA	NA	NA	NA	NA	NA	NA	NA	NA	NA	NA	NA	NA	NA	NA	NA	NA	NA	NA	NA	NA	NA	NA	NA	NA	NA	NA	NA	NA	NA	NA	NA	NA	NA	NA	NA	NA	NA	NA	NA	NA	NA	NA
class-specific genes	240770_at	TMEM171	-0.469	0.174	-0.461	-0.789	0.423	0.209	1.064	-0.54	-0.114	0.953	0.134	0.118	0.281	0.316	0.087	0.16	-1.852	-0.523	-2.114	-1.501	-1.111	0.687	-0.574	0.231	0.054	-0.695	-1.357	0.229	-0.398	0.219	0.264	0.782	1.24	-1.145	0.495	1.601	-0.111	-1.51	-0.369	0.378	-0.456	-0.462	0.099	0.135	0.683	0.625	0.86
class-specific genes	223723_at	MFI2	-0.138	0.912	0.064	-0.131	-0.927	0.027	0.014	0.024	0.606	0.123	0.677	0.373	0.112	0.538	-0.558	-1.245	0.199	-0.497	-0.516	0.062	-1.415	-0.799	-1.664	-0.161	0.813	-0.079	1.097	-0.069	0.134	-0.878	1.279	-1.071	-0.929	0.115	1.137	-0.212	1.185	1.508	-0.157	-0.385	0.901	0.131	1.175	-1.451	0.466	-0.055	-0.052
class-specific genes	223779_at	MGC10981	-2.817	1.538	-0.171	-0.265	-0.103	-0.605	0.057	-0.405	2.445	-0.272	0.069	-3.046	0.998	-2.513	-0.195	-0.345	-0.042	0.141	-0.746	-0.292	-1.233	-0.227	-0.478	0.735	0.879	1.019	0.394	-0.382	-0.276	-1.244	1.864	0.146	1.933	-0.278	-0.276	-0.626	0.306	-0.039	-0.405	1.906	-1.62	3.177	0.104	0.516	3.515	0.246	-0.785
class-specific genes	235272_at	SBSN	-2.102	0.119	-1.818	0.058	-2.577	-1.356	0.528	-1.809	0.86	0.225	-0.33	-1.929	-1.735	0.005	-0.361	0.124	-1.413	-1.449	-1.282	0.356	0.465	0.658	1.008	-0.538	0.796	0.79	-0.53	-1.038	0.578	0.272	-2.211	-1.774	0.878	0.147	0.507	0.314	0.032	-1.222	0.163	-0.19	0.396	-0.386	0.86	-1.002	0.191	1.808	-1.097
class-specific genes	214974_x_at	CXCL5	-0.884	-0.006	-0.051	0.573	0.244	-0.683	-0.631	-1.145	-0.777	-0.638	0.213	-0.511	-1.479	-0.352	-0.478	0.274	-2.702	-1.977	-1.76	-1.809	-0.984	0.551	0.497	0.237	1.207	-0.317	2.371	0.175	1.613	-0.996	2.625	-0.749	0.746	-1.118	-0.563	0.62	-0.572	-2.057	-0.327	-2.307	-1.162	-0.449	-1.068	0.411	1.135	-0.046	1.151
class-specific genes	205637_s_at	SH3GL3	-0.654	-1.46	-0.302	-1.707	1.272	0.069	0.19	-2.303	0.896	-0.704	0.578	-1.235	-1.406	-1.552	-0.853	-1.146	-0.41	-1.585	-1.95	-0.666	-0.544	0.26	0.265	-1.037	0.741	1.187	-1.58	-1.426	-2.242	-1.331	-0.383	-0.55	0.235	-0.073	-0.236	0.804	-0.73	-2.145	0.322	-1.874	1.086	-0.184	-2.367	0.417	0	0.171	-0.152
class-specific genes	233320_at	TCAM1	-0.194	-0.659	-0.009	0.323	-1.004	-1.787	-0.131	-1.012	0.962	-0.294	0.052	-2.829	-2.592	-0.561	-3.456	-0.702	-2.332	-3.292	-0.303	-0.461	-0.466	0.14	-2.552	0.565	0.481	0.405	-0.158	-1.092	-1.91	-0.761	-0.54	-1.648	-1.721	0.353	-2.493	0.011	0.582	-1.742	0.772	-2.344	-0.773	0.55	-1.077	-0.126	0.43	-1.263	-2.489
class-specific genes	205199_at	CA9	0.214	-0.048	1.036	-0.83	2.93	0.519	0.044	-0.601	1.933	1.732	2.012	-0.837	1.981	-1.159	0.116	-1.179	-0.204	-0.633	-0.934	-1.4	-0.594	-2.656	-0.357	0.756	0.607	0.027	-0.286	-1.669	0.988	0.828	0.434	0.668	1.942	-0.801	-0.286	-0.604	-0.013	0.341	-0.588	-0.142	0.093	0.946	0.211	2.596	1.048	1.365	1.144
class-specific genes	209990_s_at	GABBR2	-0.954	0.052	-0.077	-2.071	1.145	0.378	0.298	-1.011	0.006	-0.12	-0.198	-1.774	-2.491	-2.04	-1.193	0.094	-2.795	-3.217	-2.776	1.253	-0.492	-0.873	-0.656	0.422	0.429	0.84	0.561	-1.066	0.281	-3.479	-0.58	0	-0.45	0.114	-0.51	2.314	0.155	0.757	0.258	-2.4	0.001	0.007	0.385	0.023	-1.46	-0.089	-0.128
class-specific genes	207254_at	SLC15A1	-0.532	-0.436	0.2	0.327	0.291	0.111	0.844	0.377	2.264	0.238	-0.253	0.85	0.029	0.435	0.1	-0.024	0.033	-2.74	-0.032	-2.86	-1.899	-0.559	1.367	-0.087	-1.672	1.036	-0.05	0.928	0.013	-0.953	1.509	-0.611	0.126	0.12	1.297	-0.217	0.748	0.642	-0.449	0.274	0.408	-0.024	-2.846	0.615	0.052	-0.219	0.454
class-specific genes	226913_s_at	SOX8	-0.665	1.909	-1.256	-1.227	-0.505	0.895	0.318	-0.329	-0.123	1.478	1.688	0.557	-1.242	-0.892	-0.46	0.159	-0.597	-0.679	-0.332	1.131	-0.427	1.115	-0.163	0.526	-0.812	-0.255	-0.32	0.582	-0.675	1.296	-0.123	-0.794	-0.505	0.273	-0.346	-0.456	-0.638	0	0.076	-1.09	0.207	0.496	0.173	0.009	-0.014	-0.221	-0.304
class-specific genes	xxx	NA	NA	NA	NA	NA	NA	NA	NA	NA	NA	NA	NA	NA	NA	NA	NA	NA	NA	NA	NA	NA	NA	NA	NA	NA	NA	NA	NA	NA	NA	NA	NA	NA	NA	NA	NA	NA	NA	NA	NA	NA	NA	NA	NA	NA	NA	NA	NA
class-specific genes	223861_at	HORMAD1	-1.192	-0.966	-0.906	-1.051	1.859	-1.204	0.258	0.008	-1.547	0.901	0.63	0.475	-1.987	0.348	0.008	-0.446	-1.628	-1.049	0.591	-1.021	0.627	-0.943	-0.605	1.189	0.189	-1.194	0.367	-0.943	-1.015	-0.914	0.466	0.472	-1.067	0.371	-0.914	0.242	0.136	-1.466	0.971	-1.046	-0.41	1.693	-1.142	0.563	-0.893	1.149	0.944
class-specific genes	222891_s_at	BCL11A	0.776	-0.68	-0.147	0.857	-1.561	-0.075	-0.296	0.531	-1.092	0.598	-0.661	0.617	-0.263	0.767	-0.725	0.315	-1.022	-1.97	-2.706	-2.231	-0.45	0.062	-1.648	-0.572	-1.478	-2.726	-1.698	-0.108	0.177	-0.036	-1.814	0.259	-1.365	-0.966	-0.665	1.279	0.608	0.233	-4.316	1.428	0.393	0.406	1.177	0.907	0.488	0.672	-0.196
class-specific genes	219415_at	TTYH1	-0.185	-0.622	-0.265	0.406	0.083	0.232	-0.089	0.083	2.936	-0.218	0.883	-0.891	1.279	-0.43	-0.953	0.985	-0.517	-0.987	1.675	-0.391	0.567	0.646	-0.822	0.585	0.983	0.53	0.132	2.041	0.599	1.024	-0.453	0.162	0.55	-0.473	-0.342	-0.701	1.982	-0.113	0.646	1.469	2.155	1.194	0.229	-0.877	0.605	-0.458	0.449
class-specific genes	242940_x_at	DLX6	-0.283	0.881	-1.024	0.421	1.137	-0.08	-0.552	-0.241	0.491	1.012	-0.522	0.654	0.934	-0.777	0.427	-0.421	-0.546	-0.034	-0.256	-0.313	-1.942	-1.987	-2.589	-0.312	1.037	-1.061	0.855	-1.842	-0.226	-2.698	-0.785	-0.765	-0.139	-0.788	-0.212	0.363	-1.657	-1.992	-0.37	-1.574	1.199	-0.323	0.584	-1.114	0.423	0.292	-0.469
class-specific genes	242271_at	SLC26A9	0.363	0.114	0.001	0.384	1.051	0.524	-1.435	0.006	0.467	-1.473	0.606	-2.529	0.233	0.526	-1.054	0.087	-1.497	-2.11	-0.202	-0.613	-2.438	0.742	-0.243	0.231	0.888	-0.778	0.121	0.167	0.163	1.129	1.615	-0.036	2.229	0.218	-0.326	0.528	0.15	0.473	0.418	0.339	-0.275	1.373	-0.393	0.408	0.783	1.488	0.178
class-specific genes	217213_at	SLC6A2	-2.258	0.701	0.506	0.546	0.411	-0.831	-1.582	-0.368	-1.756	-1.582	0.444	-2.301	-2.258	-1.008	-0.404	0.348	-1.354	-1.282	0.259	-1.822	-1.476	-1.718	-1.654	1.651	-0.278	1.618	0.604	-1.486	-1.413	-0.272	-1.561	0.632	-1.538	-1.395	0.959	-0.315	-0.731	-0.348	0.621	-1.584	-1.57	0.438	0.282	-0.972	-1.391	-1.18	-0.198
class-specific genes	208358_s_at	UGT8	-0.107	-0.021	0.008	-0.228	-1.522	0.261	0.278	0.841	0.006	-0.51	0.099	-0.129	0.284	-0.428	-0.46	-0.03	-1.011	-1.017	-1.653	-0.141	-0.772	-0.452	-0.586	-0.418	0.357	-0.746	0.488	0.549	-0.157	0.356	1.539	0.853	0.983	0.363	-0.064	0.233	0.311	1.131	-0.245	0.214	0.04	0.29	0.486	-1.273	0.201	0.47	-0.207
class-specific genes	218847_at	IGF2BP2	0.018	1.174	0.337	0.977	1.002	-0.052	0.213	0.1	1.011	0.443	0.476	0.161	0.158	1.622	-0.049	-0.981	-2.628	-0.57	0.069	-1.367	-0.788	0.484	0.286	0.293	-0.647	0.706	-0.352	0.141	-0.502	-1.734	-0.139	-1.758	-0.69	-0.44	-0.151	0.861	-0.935	0.334	-1.841	0.238	1.108	1.885	1.191	-0.424	-0.798	-3.518	0.847
class-specific genes	229936_at	GFRA3	-0.561	-0.272	-2.557	0.603	0.005	0.875	0.53	0.26	-0.344	-0.828	0.89	-0.146	-1.073	-2.031	-0.673	-0.688	-0.911	-2.328	-1.329	-0.448	-0.957	-1.194	-0.976	0.061	-0.362	0.874	-1.119	-2.521	0.265	-2.758	-0.997	0.172	-0.453	0.592	-1.63	-0.072	0.206	-0.671	0.599	-0.625	-0.4	0.46	0.057	1.749	1.76	0.91	-1.486
class-specific genes	206373_at	ZIC1	0.699	0.277	-0.727	3.43	0.427	0.292	1.484	-0.6	0.258	1.063	0.027	-0.117	-1.285	0.073	0.975	1.332	1.174	-1.445	-0.574	-1.459	-1.459	-1.018	-0.097	-0.131	-0.023	0.404	-0.242	-1.161	-0.191	-0.715	-0.799	1.12	-0.083	-0.322	0.014	-0.512	0.538	-0.509	2.023	1.513	-0.383	0.618	-1.148	1.359	0.076	0.03	-0.966
class-specific genes	205225_at	ESR1	-1.24	-0.482	-0.09	-0.049	0.059	-2.297	-0.617	-0.664	-1.836	-0.227	0.105	-0.537	-0.496	0.785	-0.436	0.173	0.396	0.681	0.057	0.075	-2.815	-1.364	-0.039	0.805	0.087	0.646	-0.056	0.345	0.615	0.085	-1.319	0.565	-1.317	1.332	0.224	0.314	0.289	0.263	-0.694	0.314	0.153	-0.528	-0.076	0.385	-0.049	0.042	0.193
class-specific genes	204623_at	TFF3	0.291	-0.412	0.415	-0.646	0.395	0.258	0.127	-0.672	0.358	-0.256	-0.185	0.235	0.7	0.558	0.548	1.536	0.901	0.835	0.997	1.121	1.061	-0.757	0.384	0.351	-0.384	-0.677	0.116	0.193	-0.16	-0.534	2.986	-0.199	2.274	0	-0.648	-0.128	-0.536	-0.09	-0.373	-0.708	-1.186	-0.347	0.386	0.968	0.6	0.005	0.816
class-specific genes	226067_at	C20orf114	-1.314	0.106	0.514	-1.545	1.343	0.639	2.521	-1.121	-0.752	-0.849	0.025	-1.966	-1.896	-1.545	-0.312	1.253	-0.995	1.408	1.9	1.084	-0.751	0.094	0.005	0.185	-0.436	0.847	-0.407	-1.476	-1.071	-1.983	0.084	-0.294	-0.427	0.095	-0.07	0.115	1.097	0.148	0.051	-1.151	-1.585	0.293	0	-0.448	0.582	-0.036	-0.434
class-specific genes	218211_s_at	MLPH	0.388	0.454	-0.261	-0.095	1.356	0.274	0.817	-1.327	0.745	0.39	0.159	0.296	0.915	0.838	0.401	0.797	0.608	0.522	0.945	0.508	-0.086	0.218	-0.504	-0.175	0.989	-0.321	-0.275	-0.512	-0.77	-1.154	1.578	0.796	1.388	0.762	-0.118	0.412	1.098	0.001	-0.299	0.558	-1.18	-0.414	-0.732	0.674	0.112	0.264	0.834
class-specific genes	208063_s_at	CAPN9	0.332	0.426	0.242	-0.772	-0.122	0.797	0.744	0.116	0.227	0.14	0.935	0.882	0.808	0.364	0.807	0.417	1.001	0.931	0.21	-2.446	1.061	-2.234	0.973	-0.092	-0.542	-0.294	0.036	-1.13	-0.35	-1.848	2.147	0.9	1.879	2.07	-1.899	0.384	0.385	-0.136	-0.831	0.399	0.905	0.849	0.143	0.049	0.831	-1.824	0.391
class-specific genes	226961_at	PRR15	0.399	0.359	0.607	0.357	-1.05	0.027	0.077	0.736	-0.514	1.139	0.687	0.817	1.237	0.446	1.144	0.009	0.79	1.227	0.626	0.801	-0.023	0.105	0.45	1.074	-1.224	0.397	0.114	0.4	0.409	-0.811	1.373	0.131	0.978	-0.042	0.311	-0.103	0.592	1.04	-1.967	-0.751	-0.088	0.254	-0.144	0.473	0.181	0.623	0.638
class-specific genes	205948_at	PTPRT	-0.841	-1.607	0.926	-1.666	-0.497	1.329	-0.33	-0.626	0.426	-0.295	-0.241	-2.179	-1.968	-0.626	-0.065	-1.06	0.681	0.272	-0.329	0.632	-1.77	1.253	-0.329	0.732	0.244	-1.062	0.656	-0.143	0.574	-0.338	0.251	-0.427	0.711	0	0.538	2.097	-0.381	1.234	-0.702	-0.454	-0.156	1.606	1.26	-1.081	-0.047	0.935	-0.652
class-specific genes	204540_at	EEF1A2	-0.559	-2.341	-0.18	-0.937	0.511	-0.254	-1.749	0.252	0.3	0.335	-0.194	-0.69	-0.119	0.577	-0.581	0.573	0.439	-0.407	1.742	2.262	1.025	3.242	2.181	0.048	0.599	0.731	-1.355	0.759	0.416	-0.792	-0.405	-0.412	0.507	-0.03	2.642	-0.665	-0.144	-0.8	1.605	-0.786	0.04	0.496	0.631	-0.133	0.176	-0.239	-1.369
class-specific genes	229499_at	CAPN13	-0.702	-2.505	0.246	0.324	0.899	0.059	0.785	0.273	0.547	-0.495	0.953	0.898	1.406	-3.357	-1.117	0.311	1.521	-0.447	-1.283	1.437	-0.065	-0.287	-3.04	0.451	-0.518	1.544	-0.088	-2.552	-0.269	-1.399	-0.003	-0.469	0.606	-0.631	-0.036	0.586	-0.304	0.364	-2.652	-1.66	-0.614	-0.171	0.951	0.788	0.916	0.761	1.335
class-specific genes	229030_at	CAPN8	0.455	0.363	-0.092	-1.657	1.22	0.013	0.762	-0.303	0.613	0.574	0.008	0.456	0.645	1.331	1.178	0.878	0.489	0.528	0.161	-0.181	0.088	-0.762	-0.501	-0.819	0.01	0.679	0.699	0.373	-0.723	-1	2.367	-0.222	3.475	-0.407	1.039	0.046	0.471	0.037	0.863	-0.716	-0.966	-2.741	0.503	0.148	0.3	1.281	1.656
class-specific genes	238657_at	UBXN10	0.441	0.852	0.507	0.846	1.365	0.468	-0.554	0.518	0.216	0.541	1.076	-0.216	-0.244	0.036	-0.898	-1.726	0.312	0.135	0.99	0.986	0.255	-0.053	0.556	0.422	1.3	1.195	-1.243	-1.86	0.599	0.534	0.794	-0.355	0.483	-0.692	0.994	-0.079	1.123	0.283	-0.788	-0.787	-1.363	-0.455	0.356	0.319	0.4	0.076	1.201
class-specific genes	214774_x_at	TOX3	0.631	-0.085	0.167	-0.658	-0.434	0.478	-0.324	0.075	-1.191	0.032	-0.08	0.261	-0.559	-0.163	0.611	0.222	0.04	0.987	0.913	0.106	1.181	0.207	-0.419	-1.881	-0.517	-0.586	-1.303	0.534	-0.818	0.134	1.062	-0.951	1.35	-0.948	-0.062	0.012	0.249	0.286	-1.122	-0.758	-2.305	-2.44	1.342	0.578	0.359	-0.47	-0.203
class-specific genes	211421_s_at	RET	-1.9	0.175	-1.311	-0.766	-0.91	0.534	0.644	-2.649	-1.8	0.031	1.153	0.04	-0.434	-2.093	-1.433	0.318	-0.484	-0.402	1.709	2.099	0.868	-2.255	-0.892	-1.994	0.257	0.326	0.292	-1.044	0.362	-0.267	-0.377	1.12	0.231	1.141	0.004	0.505	0.074	-1.695	1.02	1.38	-0.157	-0.014	-0.596	-0.236	-0.395	0.003	0.326
class-specific genes	236496_at	DEGS2	1.018	0.448	0.289	0.396	1.09	0.614	0.946	-0.456	0.433	1.117	1.53	0.616	0.393	0.519	0.289	-0.176	0.34	1.357	0.5	0.409	-0.62	1.682	-1.172	-0.428	1.342	1.674	1.085	-0.448	-1.207	0.461	0.755	-1.023	1.232	-0.783	-0.755	-0.889	0.617	1.057	0.193	-0.099	0.256	-0.607	-1.246	0.564	0.819	-0.888	-0.231
class-specific genes	209602_s_at	GATA3	0.53	-1.333	-1.359	0.324	-0.025	-0.082	-0.029	-1.722	0.344	0.627	0.015	-0.914	0.182	1.338	-0.471	0.332	1.099	0.987	0.369	0.198	-1.578	-1.079	0.797	1.062	-0.785	-0.216	0	-0.891	-0.159	0.48	-0.861	-0.016	-0.036	-0.776	-0.35	0.373	-1.014	-0.959	0.378	-0.184	0.308	-1.054	0	0.436	-0.965	-0.451	1.053
class-specific genes	228241_at	AGR3	0.137	0.197	0.03	-0.263	0.972	0.11	0.391	-0.08	0.416	-0.42	0.699	0.601	0.845	-0.079	0.274	0.568	0.654	0.631	0.214	0.056	-0.306	2.341	0.843	-0.387	-1.039	0.435	0.385	-0.617	-0.585	-0.117	2.143	-1.169	1.465	-1.528	0.343	-0.068	0.141	0.548	-1.543	0.571	-1.509	0	0.453	0.481	0.549	-0.187	1.385
class-specific genes	219414_at	CLSTN2	-0.508	-1.165	-2.332	0.519	-0.385	-0.863	0.805	0.294	0.919	0.624	0.654	-0.783	-0.692	0.623	-0.116	0.293	-0.054	1.601	0.963	1.193	-2.081	1.235	0.613	-0.057	-0.068	-0.485	-1.116	2.151	0.456	-0.897	-1.814	-0.362	0.186	-0.289	-2.207	0.205	0.094	0.197	0.44	-2.951	0.384	0.356	0.087	-1.943	0.153	0.242	-1.943
class-specific genes	209114_at	TSPAN1	0.645	0.881	1.003	-0.748	-0.664	0.902	1.023	0.693	0.207	0.194	0.325	1.096	1.302	0.318	1.195	1.111	0.177	1.616	1.058	0.702	0.832	1.572	0.911	0.566	1.038	-0.69	-0.472	1.336	-0.459	-0.136	2.074	-0.682	1.453	0.177	1.521	0.5	-0.816	0.025	-1.793	-1.63	-0.282	-0.721	0.721	-0.083	0.222	-0.767	1.285
class-specific genes	243938_x_at	DNAH5	-0.565	0.567	-1.634	-0.371	1.331	-0.562	-0.087	-2.434	0.804	1.517	0.302	-0.101	-0.677	-1.72	0.164	-0.112	-0.644	0.994	-1.207	-0.983	-0.66	-0.392	-0.715	0.799	-0.19	0.131	-0.037	-0.027	0.386	-2.055	-0.213	0.175	-1.476	0.047	0.841	0.308	0.537	-1.589	-1.298	0.079	-0.701	0.094	0.195	-0.204	-0.621	-2.907	0.725
class-specific genes	208487_at	LMX1B	-1.105	-0.943	-0.817	-0.437	2.636	0.348	-0.412	0.898	0.679	1.571	2.483	-0.364	0.354	-0.656	-0.035	1.976	1.215	-0.187	1.176	1.168	-0.504	-0.861	1.795	0.505	1.362	2.758	0.78	-0.049	0.294	-1.818	-0.699	0.008	0.196	-0.536	0.288	-0.536	1.563	0.685	0.631	-0.202	2.32	-0.388	2.542	-0.902	-0.257	0.56	0.919
class-specific genes	240304_s_at	TMC5	0.021	-0.87	0.234	0.033	0.271	-0.071	0.125	0.129	1.421	0.033	0.79	0.432	0.149	0.265	-0.155	0.937	0.315	-1.509	-0.793	-0.202	0.407	0.15	0.137	0.745	0.394	0.877	-0.119	0.359	-0.384	-1.951	1.417	-1.311	1.56	-1.142	0.98	0.585	0.787	0.585	-0.048	-0.116	-0.845	-0.841	0.281	-0.147	0.054	0.398	1.071
class-specific genes	206869_at	CHAD	-0.859	-0.705	-0.515	-0.247	-0.269	-0.655	0.996	-0.083	2.111	0.045	-1.092	-0.635	1.013	-1.436	1.418	2.133	1.087	1.132	-0.689	0.571	0.595	-0.781	-0.771	-0.246	0.829	1.777	0.866	-0.583	-0.28	0.129	0.063	1.515	-0.542	-0.416	1.008	-0.652	0.118	0.012	0.113	-0.131	0.79	0.221	1.544	-0.33	-0.262	0.03	0.24
class-specific genes	224131_at	GPR81	0.186	-0.527	-1.51	-1.963	0.069	-0.865	-1.71	-2.195	-1.323	-0.066	-1.378	-0.313	0.044	-1.231	-1.828	0.347	0.136	-1.262	0.009	-0.145	0.409	-0.396	-0.539	-0.136	-0.471	-1.369	1.131	0.477	0.291	-2.083	0.039	0.831	-0.67	0.507	-1.798	0.956	-0.213	0.44	0.543	-0.281	1.606	1.123	0.632	-1.962	-1.458	-0.814	-0.407
class-specific genes	227733_at	TMEM63C	-0.382	-1.616	0.148	1.485	-1.337	-0.913	0.663	0.777	-1.019	-1.616	0.629	-0.299	-0.355	0.239	-0.274	0.525	0.942	0.231	1.03	0.891	-0.353	-0.856	1.008	-0.538	-0.323	1.321	-0.226	-1.853	-0.01	-0.393	-0.813	-1.017	-0.013	-0.01	0.869	0.181	0.659	-1.28	-0.277	0.467	0.134	1.68	0.181	-2.196	0.198	0.696	0.184
class-specific genes	205009_at	TFF1	0.963	-0.045	0.473	-0.108	1.311	0.625	1.523	0.039	1.119	0.538	0.662	0.424	0.963	0.922	0.825	1.622	1.1	0.357	0.743	1.182	-1.127	0.235	-0.289	0.406	0.348	1.105	0.882	0.013	0.577	-1.598	3.24	-0.255	3.362	0.026	-0.28	-0.263	0.085	0	0.13	-0.039	-0.251	-0.106	-0.051	-0.225	0.85	-0.276	0.58
class-specific genes	205714_s_at	ZMYND10	-1.673	0.961	-1.407	-0.699	0.244	0.787	0.564	0.273	0.659	0.558	1.058	-0.121	-0.057	-1.217	-0.968	0.312	0.855	0.03	-0.827	0.664	-1.161	0.39	0.474	1.082	0.648	0.085	0.402	1.16	-0.115	-1.443	-0.517	-1.39	-0.073	0.118	0.869	0.269	1.345	0.752	0.284	0.443	0.088	-1.135	0.188	0.841	0.686	-0.322	1.616
class-specific genes	223721_s_at	DNAJC12	-0.517	0.348	0.103	0.909	-0.07	0.213	0.246	0.726	-0.577	0.116	-0.043	0.613	1.628	-0.827	0.744	-0.089	1.759	1.793	0.17	-0.673	-0.904	-0.525	0.648	0.106	-0.793	0.813	1.843	1.875	0.034	-0.052	0.592	1.43	-0.653	-0.791	-0.522	-1.293	-1.878	-0.024	-1.991	1.32	-0.142	-1.825	-0.442	0.302	1.405	0.266	0.95
class-specific genes	214053_at	ERBB4	-0.615	-0.166	0.075	-2.374	-0.062	-0.795	-0.188	-0.458	0.16	-0.504	0.001	-4.91	-2.069	-0.977	-0.75	0.92	1.089	-0.945	0.437	-1.522	-0.148	-0.139	0.679	0.635	0.256	0.483	-0.08	-3.998	0.311	-1.757	-2.017	1.652	-1.228	1.072	1.07	-0.305	0.72	0.3	1.854	1.15	0.556	0.887	0.182	1.087	-0.226	-0.504	0.166
class-specific genes	205555_s_at	MSX2	0.787	0.222	-0.106	-0.102	-1.01	0.111	-1.69	-2.297	-0.299	0.969	-0.011	-0.116	0.174	0.388	-0.098	0.325	-1.671	-1.53	-0.059	0.549	0.663	1.43	-0.355	2.354	0.819	-0.063	-0.011	-0.192	0.007	-1.678	1.14	0.319	1.808	-0.304	-0.121	0.12	-0.599	-0.252	1.629	-1.5	0.585	-1.651	0.236	-0.708	1.258	2.089	-0.434
class-specific genes	220540_at	KCNK15	-1.131	-0.457	0.326	-0.104	0.321	1.454	-0.308	-0.118	-0.794	-1.065	-0.56	-1.908	-1.109	0.711	-1.252	-0.622	1.091	1.058	0.28	-0.656	0.087	-0.252	-0.244	0.624	0.353	0.326	-0.236	0.006	-0.63	-1.352	-2.346	0.14	-1.483	1.516	0	1.768	0.384	1.676	0.647	0.66	1.972	1.827	0.211	1.434	0.981	1.08	-0.023
class-specific genes	221585_at	CACNG4	-0.263	-0.902	0.132	-0.031	0.101	0.631	-0.102	-0.572	-0.552	0.926	0.344	-1.17	-1.051	3.59	-1.734	-0.495	-0.423	1.201	1.763	2.459	-0.336	-0.485	0.418	0.397	0.823	0.983	-0.017	-1.719	-0.119	-1.623	-1.12	-1.358	0.291	-0.12	0.105	0.396	-0.348	-0.14	1.738	-0.842	0.125	0.18	1.076	1.961	-0.59	-0.057	0.205
class-specific genes	228058_at	LOC124220	0.904	-0.133	0.068	0.125	0.4	0.563	-0.001	-0.533	0.374	-0.353	0.678	0.018	0.459	0.727	0.879	0.948	0.75	0.814	0.28	0.051	1.066	-0.412	-0.601	0.281	0.047	0.578	1.161	-1.147	0.284	-1.438	2.571	-0.061	1.936	-0.765	-0.625	-0.511	1.337	-0.196	-0.789	-0.625	-0.361	-0.056	0.066	-1.247	0.283	0.484	0.671
class-specific genes	234221_at	BCAS1	-0.002	-0.975	-0.688	0.863	0.771	-0.181	-0.315	-2.018	-0.217	0.278	-0.006	-0.039	-1.502	-1.98	-1.669	-1.273	0.487	-1.292	0.653	-1.312	-0.599	0.392	-1.467	1.157	-1.453	1.517	-1.806	0.758	0.411	-0.26	-1.81	1.341	-0.545	-0.3	-0.667	0.752	-1.251	-0.502	1.17	-1.417	-0.833	-0.996	-1.577	-0.169	0.758	-1.251	-0.114
class-specific genes	228915_at	DACH1	0.609	-1.307	0.044	1.125	-1.002	-1.067	-0.94	0.154	-1.033	-0.562	-0.269	0.272	-1.108	0.73	0.322	1.068	1.135	1.133	1.433	-0.606	-1.248	-1.23	0.165	0.606	-0.412	-0.058	0.242	-3.815	0.581	-0.358	-0.518	1.181	-0.738	-2.221	-1.211	-0.861	-0.388	-0.474	-3.115	-1.616	-0.697	0.165	-1.095	1.067	1.113	0.134	-0.377
class-specific genes	237414_at	F7	-0.982	-0.562	-1.041	0.77	0.847	-0.182	-0.734	-0.206	-0.607	0.142	0.989	-0.738	0.678	-0.168	0.263	1.002	-0.417	1.207	0.266	0.665	-1.376	0.47	-0.048	1.052	1.774	1.774	0.225	-0.704	0.4	-0.033	-1.494	-0.161	1.393	0.023	-0.949	0.888	-0.247	-0.233	-0.287	-0.959	1.069	-0.049	-0.586	-0.614	-1.462	1.022	1.657
class-specific genes	210272_at	CYP2B7P1	0.424	-0.308	0.107	-1.098	0.636	0.537	-0.48	-0.459	0.985	0.36	0.709	-3.647	-0.798	-1.234	-2.098	1.2	1.835	1.554	2.14	1.201	-0.677	0.192	-0.893	-0.222	-0.042	-0.197	0.805	-1.307	0.787	-1.123	0.147	-0.716	1.044	0.086	-2.168	-0.117	0.29	-0.038	-0.202	-2.37	0.057	-1.286	-1.355	0.32	-2.441	-0.578	0.07
class-specific genes	203453_at	SCNN1A	0.343	0.252	0.375	-0.198	0	0.254	-0.13	-0.066	-0.259	0.02	-0.047	0.333	0.506	0.299	0.541	0.252	0.438	0.556	1.228	0.151	0.91	1.55	1.489	0.565	0.365	-0.182	0.59	1.271	0.402	-0.229	0.288	0.266	-0.081	0.151	0.304	0.493	0.225	0.387	-0.913	0.368	0.092	0.465	0.121	0.157	-0.066	-0.008	0.278
class-specific genes	226248_s_at	KIAA1324	0.297	-0.301	0.624	-0.799	0.489	0.319	0.161	0.116	-0.238	-0.003	-0.025	1.017	0.87	0.101	0.839	0.604	0.629	0.322	0.673	0.436	0.635	-0.809	-0.855	-0.088	-0.655	2.272	1.127	0.077	-0.886	-0.637	0.961	-0.187	0.138	0.973	-1.432	0.162	-0.018	0.591	-1.12	1.435	-0.794	-0.973	-0.822	0.512	0.174	0.265	0.055
class-specific genes	210096_at	CYP4B1	0.033	-0.438	1.177	0.039	0.62	0.46	0.421	0.753	0.398	0.164	-0.124	-0.035	-0.306	0.727	-1.552	0.028	-0.725	0.619	0.115	1.858	0.771	-1.429	0.273	-0.906	0.273	-0.046	0.866	0.423	0.891	0.295	-1.801	0.886	0.161	2.187	-1.688	-0.026	1.193	1.076	0.187	1.524	-0.998	-0.198	-0.421	0.919	-1.274	-1.865	0.669
class-specific genes	237086_at	FOXA1	0.341	0.129	-0.292	-0.658	-1.819	1.217	0.137	-0.806	-0.087	0.203	0.147	-0.671	-0.07	-0.153	-1.02	0.738	-0.545	-0.822	-1.002	-0.462	-0.676	-1.19	0.225	0.421	0.259	0.899	0.355	-0.462	-1.559	-2.706	0.606	0.218	0.388	0.012	-0.337	0.049	-0.159	-1.148	-0.145	-0.392	-0.229	-0.617	0.214	-0.209	0.827	-1.933	0.281
class-specific genes	230323_s_at	TMEM45B	-0.135	0.311	0.404	0.351	0.035	0.178	0.54	0.366	0.265	0.852	0.612	0.515	0.272	0.104	0.4	0.984	-0.015	0.062	0.854	1.558	1.658	0.036	1.478	-0.177	-0.294	0.346	0.606	-1.795	0.74	-1.399	2.345	-1.131	1.689	-0.637	-0.239	0.394	-0.295	0.665	-1.937	-0.995	-0.986	0.304	0.687	-2.481	0.671	1.022	0.714
class-specific genes	208473_s_at	GP2	-0.202	-0.34	-1.04	-0.173	-2.015	-0.076	-1.263	-0.69	-0.734	0.423	0.263	0.029	-1.853	-0.001	0.091	0.047	0.477	0.768	1.199	1.745	0.016	0.924	0.469	0.143	1.216	-1.376	-0.894	-1.311	0.193	-1.358	3.223	-0.096	0.143	0.403	-0.415	-1.444	-1.539	-1.04	-0.999	0.197	-0.832	0.081	-0.351	0.134	-0.52	-0.804	1.611
class-specific genes	209173_at	AGR2	0.278	0.548	0.272	-0.085	1.391	0.353	0.233	0.163	0.462	0.431	0.797	0.274	0.178	0.083	0.454	1.109	-0.223	0.752	0.047	0.279	0.209	-0.612	0.179	0.725	-0.45	-0.074	-0.066	-0.217	-0.302	-0.816	1.939	-1.766	1.539	0.156	0.562	-0.09	-0.054	0.073	-0.787	0.047	0.114	-0.225	0.601	0.279	0.009	-0.464	0.491
class-specific genes	230700_at	RTN4RL1	-0.016	-2.282	-1.653	0.307	0.425	0.723	-0.272	0.408	-0.456	1.241	0.298	0.425	1.236	0.573	-1.103	0.357	1.27	1.306	0.671	0.46	-0.136	-0.201	0.342	-1.615	-0.044	0.799	1.421	-1.973	-0.381	-0.115	-0.382	-0.002	-1.212	0.04	-0.589	0.118	0.7	1.695	0.719	-1.316	0.168	-0.251	-1.451	0.759	0.871	0.515	-0.057
class-specific genes	205186_at	DNALI1	-0.791	1.713	1.064	-0.44	2.25	-0.284	-0.776	1.984	-0.243	-0.155	-0.188	-0.481	-0.706	1.249	1.225	-0.867	0.654	0.758	0.99	0.61	-0.123	0.955	0.425	0.977	0.243	-1.109	-1.299	0.709	0.427	0.165	0.414	-0.1	-1.72	-0.292	0.399	-1.769	0.655	0.974	-2.095	-0.798	-1.676	0.513	0.166	0.506	0.512	-0.111	1.344
class-specific genes	1563658_a_at	SYT9	-1.202	0.424	0.833	-0.49	2.299	1.935	1.22	-0.389	1.093	0.163	1.907	-0.401	-1.657	-0.82	-1.327	-0.6	-0.501	1.593	-1.228	-0.687	-0.105	-0.581	1.251	1.082	-1.109	0.972	-0.335	-0.681	-1.068	1.657	-0.819	-0.494	1.064	-0.658	-0.246	0.331	-0.658	-0.007	1.86	-0.579	1.474	0.235	2.387	0.314	-0.287	1.012	0.619
class-specific genes	220192_x_at	SPDEF	1.004	1.202	0.238	0.556	1.161	0.706	0.278	0.095	1.2	1.022	0.406	0.753	0.923	-0.59	0.66	0.604	0.592	0.442	0.715	0.239	0.822	-0.401	-0.107	1.119	-0.084	-0.864	-1.818	-0.845	0.669	-0.361	1.532	0.418	0.581	1.775	-1.633	0.304	1.06	0.888	-0.143	0.474	-1.298	-1.167	-0.196	0.355	-0.026	0.168	0.284
class-specific genes	219197_s_at	SCUBE2	-0.183	-0.771	-0.667	0.275	0.058	0.074	0.422	-0.406	0.209	-0.32	-0.464	-0.51	-0.499	0.652	-1.008	1.029	-0.851	1.258	-0.394	-0.263	-1.549	-2.073	1.267	-0.411	0.347	0.636	0.069	-0.299	0.179	-1.124	-0.497	0.064	-0.26	0.518	-2.071	1.512	0.275	1.73	1.084	2.215	0.402	-3.05	-0.046	0.333	-0.409	-0.562	-0.337
class-specific genes	229158_at	WNK4	0.617	-0.104	0.809	0.942	0.361	0.457	-0.35	0.32	-0.555	-0.087	-0.509	1.371	1.285	0.446	0.607	0.706	-1.728	2.042	2.658	1.25	-1.241	-0.316	0.89	-0.806	-0.825	0.114	-1.23	-1.684	1.033	-0.981	1.896	-0.375	-0.369	-0.724	-0.197	-0.288	-1.631	0.101	-1.614	-1.716	-0.436	0.054	1.721	0.002	-0.062	-0.92	0.207
class-specific genes	204508_s_at	CA12	0.045	0.749	0.777	-0.635	-1.328	0.524	1.177	-0.022	0.637	-0.318	-0.71	0.666	1.349	0.33	0.372	0.541	0.285	1.21	1.088	0.864	-1.079	-3.338	0.792	0.518	0.328	0.043	0.728	-0.431	-0.037	0.41	-0.591	0.336	0.962	-1.807	1.339	-1.143	-0.477	0.275	0.535	-0.314	-0.13	-0.077	0.232	0.38	0.422	0.933	-1.043
class-specific genes	225516_at	SLC7A2	-1.167	0.838	-0.529	1.227	0.091	-1.192	0.522	-0.817	-0.232	0.097	-0.207	-0.296	-1.376	0.392	-1.604	-0.122	1.935	1.277	-0.431	1.089	-0.407	-2.266	1.508	-0.49	-1.442	-0.668	0.329	-2.83	-0.105	-0.516	-0.097	-1.835	-1.191	1.041	0.009	0.496	0.287	0.845	-0.765	1.508	-0.956	0.41	0.083	-0.803	0.062	-0.232	0.779
class-specific genes	227629_at	PRLR	0.435	-1.148	1.03	0.936	0.627	0.193	-0.334	0.821	-0.601	0.856	1.931	0.73	0.783	0.276	1.189	-0.001	0.959	0.776	0.874	0.589	-0.207	-0.362	0.737	0.23	-0.575	0.591	1.002	-0.863	-0.204	-1.016	0.471	-0.279	1.279	-0.563	-0.415	-1.071	-0.528	0.764	-0.434	-1.429	0.645	-0.215	-1.421	1.07	-0.761	-1.471	0.305
class-specific genes	1555203_s_at	SLC44A4	0.349	0.524	0.947	0.166	-3.343	0.757	0.665	0.125	-0.416	-1.043	0.057	-1.324	-0.633	-3.641	-0.503	0.733	-0.921	-0.526	-2.303	0.628	0.796	2.191	0.171	-0.458	0.112	0.273	-1.533	0.684	-0.499	-2.082	1.553	0.203	0.457	-1.491	0.063	0.252	-1.594	0.597	-2.316	-1.701	-1.367	-0.79	0.501	-0.129	0.303	0.584	0.855
class-specific genes	217552_x_at	CR1	-0.55	-1.805	0.131	-0.981	0.433	0.023	0.178	-0.335	0.541	-0.556	0.086	-0.756	-1.082	-0.568	-0.556	-0.58	-1.006	-0.64	0.235	-0.381	-4.352	0.278	-2.779	0.275	0.257	-0.545	1.162	1.099	-2.074	-0.813	-0.281	-0.561	-0.333	0.292	-1.071	0.352	-0.21	0.219	-0.269	-0.875	-0.651	-0.379	-0.613	0.433	-0.466	0.552	-0.267
class-specific genes	203131_at	PDGFRA	-0.186	-0.652	-0.18	-0.192	-1.418	0.343	0.448	0.088	-0.467	-0.297	-0.43	-0.171	0.065	0.415	0.118	-0.455	-1.176	-1.049	0.121	-0.051	-0.986	-0.21	0.673	0.194	-1.476	0.026	-1.25	-1.692	0.092	-1.049	-0.3	-1.92	0.592	-2.5	-0.595	0.103	0.687	0.032	-2.259	-0.21	-0.173	-0.865	0.046	-0.649	-0.388	1.395	0.228
class-specific genes	228720_at	SORCS2	-0.774	-0.056	0.155	-0.54	0.592	0.128	0.037	-0.091	-2.457	-0.351	-0.473	-0.716	-0.927	0.392	-0.404	-2.959	-0.781	-0.922	0.238	0.11	-0.931	-0.868	0.579	0.145	0.124	0.401	0.103	-1.395	1.191	-2.515	0.699	-3.256	0.929	-1.741	0.311	-0.334	0.682	-0.545	-2.289	-0.151	-0.297	0	-0.331	0.799	0.858	0.028	-2.576
class-specific genes	209955_s_at	FAP	-0.824	-1.223	-0.296	0.17	-0.233	-0.685	0.177	-1.535	0.271	-1.042	0.729	-1.325	-2.083	0.231	-0.098	-0.871	-0.374	-0.719	-0.095	0.162	-0.006	-0.551	-0.941	-0.191	-0.414	0.233	-0.173	-2.116	0.129	-1.694	-0.749	0.093	-0.261	-1.232	-0.856	-0.848	-1.216	-0.17	-2.347	-1.544	0	-1.02	-0.255	-0.76	-0.238	-0.287	0.109
class-specific genes	212713_at	MFAP4	-0.348	0.03	-0.383	0.285	-1.733	0.279	0.459	-0.192	0.171	-0.922	-1.35	-0.032	-0.155	-0.042	-0.074	-0.844	-1.947	-1.043	-0.06	-0.815	-1.136	-0.555	1.67	0.856	0.12	-0.451	-0.207	-0.415	-0.219	-0.657	-0.236	1.041	-0.379	-0.835	-0.813	-0.664	-0.453	-0.592	-0.882	-1.229	-2.104	0.515	-0.264	-1.139	-1.669	-0.16	-0.22
class-specific genes	214454_at	ADAMTS2	-0.219	-0.075	-0.028	-0.327	0.433	0.156	0.604	-2.28	-0.035	-0.925	0.483	-1.258	-1.752	-0.205	-0.342	-2.686	-1.005	-1.491	-0.981	-0.646	-0.794	-1.837	-0.054	-0.716	1.635	-1.006	0.507	-0.493	-2.582	-1.205	0.313	-0.469	-2.591	-0.999	-1.605	0.136	-0.478	-2.135	-1.442	-2.528	-0.431	-2.004	-0.099	0.269	0.534	-0.231	0.427
class-specific genes	210072_at	CCL19	-0.306	-0.321	-0.311	0.41	0.215	0.118	0.544	-0.186	-0.06	-0.899	-0.276	-0.57	-0.432	0.585	-0.422	0.233	-1.685	-0.758	-0.391	-0.379	-1.808	-0.579	1.278	1.018	-0.112	-0.107	-0.455	-0.832	0.118	-1.732	-1.88	-0.172	0.504	-0.018	-0.174	0.014	-1.322	0.072	0.362	-0.634	-0.37	0.313	1.653	-0.193	0.116	-0.465	0.628
class-specific genes	205619_s_at	MEOX1	-0.54	-1.309	0.125	-0.018	0.508	-0.08	0.614	0.041	0.176	-0.153	-0.762	-0.143	-0.272	-0.072	-0.288	0.514	-1.623	-0.129	0.186	-0.713	-3.051	-0.763	-1.747	-0.662	0.51	1.182	0.772	-1.187	0.6	-0.324	-0.543	1.321	-0.182	-1.864	-0.397	1.014	0.038	-0.697	-2.099	1.162	1.787	2.565	-0.089	-0.269	0.157	-2.168	-0.064
class-specific genes	206341_at	IL2RA	-0.764	0.124	0.083	-0.58	-1.805	-0.286	0.484	-0.563	0.28	-1.753	-1.246	-0.805	-0.438	-0.729	-1.375	0.681	-1.174	-0.395	-1.262	-0.051	-0.752	-0.145	-0.933	-1.594	-1.885	-0.034	-0.276	-0.045	-0.476	-0.889	-0.021	0.192	0.386	-0.295	-0.697	0.459	-1.307	0	0.462	-0.641	-0.262	-0.708	-0.144	-1.436	0.515	0.326	0.38
class-specific genes	207134_x_at	TPSB2	0.044	0.383	0.727	-0.006	-1.223	0.91	0.491	0.185	-0.07	0.61	0.703	0.417	0.158	0.275	0.597	-0.282	-0.915	0.537	-0.409	0.26	0.087	1.045	-0.703	0.721	-0.937	-2.054	0.942	0.752	0.722	0.805	-0.734	-0.804	-0.076	0.906	2.856	-0.613	-0.716	0.98	-0.252	-1.174	0.088	0.042	-0.447	-0.082	-0.006	0.743	-0.329
class-specific genes	204606_at	CCL21	-1.225	-0.014	0.473	0.608	-0.521	-0.099	0.596	-0.04	-0.558	-0.57	0.314	-0.357	-0.716	0.792	0.281	-0.404	-0.87	-0.916	0.037	-1.189	-0.849	-0.773	1.001	0.828	-1.225	0.903	-2.018	-0.568	0.226	-0.28	-0.509	-2.251	0.271	0.134	-0.282	-0.074	-1.518	-0.436	-0.118	-0.83	-0.542	-0.796	0.81	-1.354	0.664	-2.149	1.237
class-specific genes	211726_s_at	FMO2	-1.456	-1.081	-0.757	-0.341	0.742	-0.67	0.49	0.019	-0.053	-2.27	-1.806	-1.443	-1.563	-0.138	-1.252	1.073	-2.372	-1.991	-1.48	-1.254	-2.214	-0.338	-0.239	0.796	1.418	-0.422	0.584	-0.996	-0.398	0.55	-0.506	-0.366	-0.796	-0.393	-0.607	-1.255	1.198	1.853	1.895	-0.579	-0.489	-0.474	0.206	-0.285	0.483	-0.406	0.124
class-specific genes	203305_at	F13A1	-0.88	-0.696	-0.835	-0.227	-0.218	-0.339	0.402	0.159	-0.079	-0.624	-0.034	-1.61	-0.925	-0.767	-1.123	-0.365	-0.236	-1.522	0.393	-0.129	-2.502	-1.677	0.45	0.054	-1.359	-0.631	1.162	-0.927	-0.514	-0.693	0.277	-1.776	0.782	-1.83	0.922	-0.07	-0.223	-0.182	-1.231	-0.795	-0.286	-1.503	0.111	0.375	0.096	0.716	0.915
class-specific genes	214587_at	COL8A1	-0.342	-0.65	-0.212	-0.323	-0.906	-0.019	-0.24	-0.848	0.194	-0.809	-0.279	-1.322	-2.858	-1.104	-0.82	-0.921	-3.504	-2.436	-0.805	-0.051	-0.333	-3.944	-0.425	-1.29	0.756	-0.578	0.014	-4.467	-3.345	-1.222	-0.471	-0.357	-0.064	-0.862	-0.569	-1.353	0.096	0.276	-0.522	-1.545	-1.228	-0.38	0.59	0.082	0.185	0.06	0.296
class-specific genes	206391_at	RARRES1	-1.381	0.427	0.055	-0.267	-0.015	-0.203	0.482	-0.371	0.561	-2.214	0.206	-0.137	-0.41	0.202	0.868	-0.457	-1.388	-1.967	-0.377	0.233	1.318	0.316	1.821	-0.525	0.756	-0.213	0.917	1.503	-0.593	0.258	0.088	-1.774	-0.452	-2.389	-0.915	-0.124	0.873	-0.345	1.384	-0.917	-0.427	-0.321	-0.409	-1.127	0.296	-0.275	-0.273
class-specific genes	213060_s_at	CHI3L2	-0.249	-0.063	0.101	0.493	0.544	-0.488	-0.449	0.391	0.401	-1.168	0.659	-1.998	-0.631	0.152	-1.932	-0.309	1.544	-0.316	-0.844	0.414	-0.237	1.038	0.976	-2.335	1.094	-0.592	1.663	1.671	0.166	-1.342	-0.149	0.156	0.487	0.282	-0.135	1.79	0.543	0.145	-1.06	-0.057	-0.417	-0.282	-1.822	0.947	0.848	0.105	0.727
class-specific genes	205648_at	WNT2	-0.858	-1.755	-0.668	0.467	0.438	-0.124	-0.453	-0.197	-0.957	-0.839	-0.407	-0.693	-0.902	1.44	0.008	-0.453	0.654	-0.864	-0.711	0.44	-0.07	-0.938	-1.806	0.354	-1.239	1.393	0.761	-0.436	-0.029	-0.679	-0.876	1.16	-0.461	0.333	-0.057	1.951	-0.25	0.55	-3.284	-0.417	0.418	-0.643	0.282	0.337	-0.01	0.085	0.813
class-specific genes	xxx	NA	NA	NA	NA	NA	NA	NA	NA	NA	NA	NA	NA	NA	NA	NA	NA	NA	NA	NA	NA	NA	NA	NA	NA	NA	NA	NA	NA	NA	NA	NA	NA	NA	NA	NA	NA	NA	NA	NA	NA	NA	NA	NA	NA	NA	NA	NA	NA
class-specific genes	221921_s_at	CADM3	-1.602	-0.522	-1.088	-0.301	-0.721	-0.905	-0.659	0.749	1.071	0.831	1.563	0.568	0.277	1.227	0.885	1.128	-0.755	0.531	0.528	0.096	-0.316	0.158	0.302	1.009	2.411	1.486	1.511	1.396	0.647	0.495	-2.094	0.44	0.714	0.071	0.25	0.054	0.38	0.906	1.999	-0.169	1.229	-0.563	0.019	0.981	-0.517	0.73	2.386
class-specific genes	204052_s_at	SFRP4	-1.438	-1.451	-0.749	0.394	-0.582	-0.555	-0.203	-0.788	-0.611	-0.672	0.108	-1.203	-1.875	1.072	0.035	-0.857	-0.812	-0.877	0.063	-0.535	-0.46	-0.817	-0.036	-1.299	-0.266	0.057	0.481	-0.74	-0.123	-0.319	0.148	-0.788	0.107	-1.026	-1.404	-0.857	0.241	0.077	-1.667	-0.969	1.369	-1.133	0.416	0	0.372	-2.183	0.74
class-specific genes	213994_s_at	SPON1	-0.648	-0.653	-0.465	-0.566	1.767	0.52	-0.102	-1.11	1.265	0.12	0.273	0.548	-0.611	-0.274	-0.007	-0.762	-0.589	-1.063	-0.5	-0.447	-0.75	0.537	0.648	-0.044	-2.037	-0.159	-1.63	0.048	0.127	1.662	-1.964	0.631	-0.951	0.959	0.83	0.34	0.935	0.351	-0.136	0.56	-0.432	1.652	-0.437	-0.079	-0.255	-1.855	0.94
class-specific genes	221019_s_at	COLEC12	-0.956	-1.366	-0.843	0.197	-0.137	-0.812	0.189	-0.428	0.511	-0.816	-0.804	-1.04	-1.216	-0.298	-0.691	-0.122	-0.7	-0.441	-0.145	-1.41	-0.696	0.257	-0.004	-0.015	-1.235	0.308	0.659	1.478	0.435	-1.934	-0.553	-1.265	-0.651	-0.328	-0.458	0.359	0.146	-0.131	0.699	0.213	-0.582	-0.685	-0.48	-0.25	-0.591	-0.879	0.018
class-specific genes	227399_at	VGLL3	-0.897	-0.837	-0.946	-0.287	0.487	-1.334	0.061	0.31	0.197	-1.014	0.145	-0.611	-1.871	0.041	-0.426	-0.688	-0.318	-1.395	-0.062	-0.607	-0.115	-0.588	-0.247	0.72	0.137	-0.323	-0.2	-0.784	-0.172	-0.176	-0.47	-0.692	0.09	-1.747	-1.366	-0.539	0.041	-1.177	-1.231	-1.338	-0.505	-0.08	0.14	-0.045	-0.406	-0.717	0.849
class-specific genes	219908_at	DKK2	0.296	0.314	-0.264	-0.182	0.2	0.666	0.602	-0.545	0.423	-4.368	-0.256	-1.35	-1.964	2.486	0.899	-0.737	-0.373	-0.98	-0.724	-0.544	-1.511	-1.524	-0.059	0.69	-1.358	-0.335	0.165	-2.534	0.604	-0.939	-0.426	-0.568	-0.184	-1.206	-0.021	-0.69	-0.294	0.336	-2.956	-1.976	-1.418	-0.174	-0.25	0.027	1.508	-1.015	0.083
class-specific genes	207191_s_at	ISLR	-0.545	-0.258	-0.457	0.495	0.108	-0.94	-0.01	-1.245	0.517	-1.681	0.161	-0.41	0.173	1.142	0.549	-0.917	-0.707	-0.198	0.566	0.301	-0.812	-0.408	0.53	-0.012	-2.437	0.031	0.301	-0.286	-0.433	-0.47	-0.889	0.094	-1.179	-1.786	-2.713	-0.339	0.272	0.046	-0.542	-0.998	-0.293	0.443	-0.16	0.302	0.148	-1.325	-0.496
class-specific genes	216839_at	LAMA2	0.067	-0.374	0.485	0.223	1.47	-0.189	0.147	0.48	-0.784	0.549	-0.514	1.467	-0.839	0.154	-1.998	-0.913	0.686	-1.602	-0.539	-1.021	0.13	0.048	0.669	0.889	-0.16	-0.705	0.438	0.54	-0.838	-1.038	-1.373	0.57	-0.429	-0.307	-0.872	0.281	0.93	-0.043	-1.02	-1.593	-1.234	-0.022	0.125	-2.121	-0.871	1.176	1.083
class-specific genes	207861_at	CCL22	-0.626	-0.227	0.758	1.064	1.307	1.088	-0.518	0.461	-1.517	-0.054	-0.521	1.014	0.714	1.181	-1.156	1.227	0.639	-0.778	0.337	0.58	0.785	0.96	-0.386	0.181	0.549	-0.111	-0.576	-0.781	-1.216	-1.61	1.588	0.274	0.298	0.355	-0.155	-0.395	-0.585	0.684	-0.145	-1.974	0.778	0.103	0.17	-1.392	-0.875	0.27	2.212
class-specific genes	226522_at	PODN	-0.017	-0.887	0.099	-0.747	-0.997	0.33	-0.201	-0.016	-0.664	-1.251	-1.31	-0.117	0.124	-0.427	-0.418	-0.921	-1.107	-0.63	-0.472	-0.338	-1.555	0.228	-1.757	0.286	0.614	0.618	-2.407	-1.968	-1.163	-2.736	-0.204	-0.455	-1.713	-2.029	-0.438	-0.694	0.333	0.18	-2.469	-2.328	-0.634	-1.6	0.062	0.099	0.122	0.481	-0.061
class-specific genes	207111_at	EMR1	-0.068	-0.51	-0.065	0.186	0.998	0.442	-2.013	-1.513	-1.63	-0.377	-1.235	-3.508	-0.219	-1.163	-0.848	-0.178	0.131	-1.079	-0.331	-0.135	0.214	0.319	0.312	0.914	-0.516	0.339	0.903	-0.042	0.169	-0.69	0.352	0.876	-1.164	0.723	0.032	-1.973	-2.255	-0.536	1.622	-1.99	0.059	-0.384	-2.032	-0.422	-1.346	0.158	0
class-specific genes	209981_at	CSDC2	-1.378	0.302	-1.189	-2.056	-0.26	-1.938	-1.657	-1.371	-0.672	0.169	0.181	0.014	0.605	-2.349	-1.505	0.901	0.28	-1.73	-1.65	-0.284	0.289	-1.032	1.139	1.027	-0.935	0.054	1.24	1.514	0.128	-1.252	0.702	0.3	-0.871	-1.441	0.75	0.34	0.448	0.727	0.108	-0.408	1.151	0.088	0.705	-1.121	0.685	-0.815	-0.39
class-specific genes	210084_x_at	TPSAB1	-0.145	0.257	0.724	-0.085	-0.54	0.608	0.344	0.319	-0.04	0.42	0.58	0.376	0.27	0.108	0.5	-0.177	-0.772	0.245	-0.412	0.405	0.6	0.927	-1.114	0.691	-0.683	-1.013	1.028	1.028	0.717	0.845	-0.804	-0.955	-0.535	1.168	3.494	-0.863	0.513	0.587	-0.261	0.546	0.217	-0.204	0.243	0.035	0	0.762	-0.891
class-specific genes	225681_at	CTHRC1	-0.601	-0.321	-0.494	0.073	-0.84	-0.716	0.256	-1.998	-0.213	-1.212	0.328	-0.804	-1.573	0.593	0.066	-1.791	-0.597	-0.553	-0.112	-0.264	-0.348	-1.211	0.852	-0.252	1.125	0.622	1.321	-1.068	1.26	-1.247	-1.007	-0.487	-1.578	-1.392	-1.959	0.064	-0.96	-0.27	-2.125	-0.307	0.061	0.719	-0.892	-0.015	0.096	-0.707	-0.903
class-specific genes	213764_s_at	MFAP5	-1.472	-0.477	-0.556	0.463	-0.607	0.006	-0.169	-0.176	-0.222	-0.804	-0.27	0.51	-1.526	0.341	-0.09	-0.825	0.074	-1.176	0	-0.002	-1.362	-0.635	0.501	0.446	-0.594	0.614	0.034	-0.882	-0.946	-1.799	-0.679	0.807	-1.356	-0.392	0.784	-1.422	-0.037	-0.023	0.095	2.401	0.723	-0.364	0	0.878	-0.365	-0.892	0.326
class-specific genes	209480_at	HLA-DQB1	-0.537	0.419	-0.294	0.04	0.385	-0.139	-1.92	-0.081	0.073	-1.525	-0.149	-1.776	0.262	0.218	0.281	-0.033	0.24	0.337	0.413	0.153	-1.508	0.479	-1.831	0.918	0.456	1.1	0.349	0.198	0.667	0.974	0.279	-1.778	0.432	0.345	-0.334	-1.407	0.323	0.375	-1.485	0.079	-0.075	-0.425	-1.933	0.303	-1.655	-1.315	0.157
class-specific genes	1555778_a_at	POSTN	-0.508	-0.541	-0.449	0.246	-1.97	-0.374	-0.153	-1.413	0.13	-0.81	0.661	-0.849	-2.278	-0.388	0.054	-0.51	-0.672	-0.548	0.166	0.511	0.215	-1.705	-1.354	-0.493	-0.229	-0.085	-0.509	-1.356	-0.235	0.668	-0.147	1.033	-0.8	-0.311	-1.093	-1.182	-0.311	0.063	-0.626	-1.245	0	-1.244	0.089	-0.986	-0.103	1.122	-0.169
class-specific genes	221901_at	LL22NC03-75B3.6	-1.815	-0.565	-0.367	0.066	0.064	-0.132	1.068	2.101	-0.104	-0.925	0.158	1.266	1.194	-0.082	0.399	0.602	-0.789	-1.084	-0.195	-1.023	-0.401	0.604	0.211	1.716	0.445	0.191	-0.415	0.514	0.724	-0.281	0.101	-0.719	-0.713	-0.374	-0.303	0.545	-0.231	-0.616	0.114	-1.369	0.03	-1.331	-0.438	-0.513	-0.535	-1.392	1.344
class-specific genes	206682_at	CLEC10A	-0.493	-0.599	-0.498	0.002	-0.079	-0.11	0.481	-0.266	1.001	-0.546	-0.948	0.347	1.135	-0.197	0.127	-0.077	-0.687	-0.616	0.82	-1.728	-0.97	0.254	-1.541	0.579	-0.949	-2.098	-2.174	0.929	-0.16	-1.034	1.273	-0.276	0.662	-0.426	-0.086	-0.282	0.301	0.945	-0.663	-2.15	-2.605	0.098	-0.733	-1.586	-0.165	-1.328	0.773
class-specific genes	219971_at	IL21R	-1.09	1.091	-0.843	1.394	2.017	-0.354	0.926	-0.759	-1.362	-1.315	1.468	0.483	-0.054	0.733	-1.663	-1.246	-0.54	-2.105	-1.774	0.165	-1.581	-0.33	-0.546	0.384	-0.973	-0.513	0.587	-0.99	-0.706	0.202	-0.69	-1.2	-0.341	-0.557	-1.017	0.555	-0.446	-0.667	-0.179	-1.256	0.565	1.532	-0.479	1.342	-0.558	1.782	-0.085
class-specific genes	226218_at	IL7R	-0.254	-0.461	-0.662	0.824	0.875	-0.628	-0.68	-0.717	0.462	-0.807	-0.626	-0.409	0.234	0.19	-1.171	-0.402	-1.583	-0.328	0.017	-0.651	-2.064	-1.596	0.064	-0.108	-0.585	0.45	-0.621	-0.565	-0.165	-1.227	0.226	-1.785	-0.319	-0.296	-0.439	0.061	-0.195	-0.579	-0.215	-0.79	-0.568	-0.747	0.051	-0.298	0.057	1.028	0.548
class-specific genes	205578_at	ROR2	-1.256	0.521	-0.479	-0.099	-0.238	0.167	-0.789	-0.469	0.162	-2.117	-1.348	-0.247	-0.77	-0.597	0.885	0.047	-0.911	1.626	-0.504	-0.821	-0.546	-1.835	0.552	0.713	0.684	-0.596	0.932	-0.914	0.571	-2.161	-1.789	-0.623	-2.205	-0.639	-2.388	-1.139	-1.354	-1.561	0.02	-1.328	-0.184	-0.532	-0.027	-0.827	-0.228	0.181	0.38
class-specific genes	228082_at	ASAM	-0.994	-0.379	0.014	0.396	-0.391	0.869	0.108	-0.389	-0.053	-1.428	0.171	-0.691	-1.98	-1.278	-1.039	0.191	-1.024	-2.804	-0.784	-0.545	-0.788	-1.025	1.504	-0.522	-0.712	-1.499	0.62	0.361	-2.065	-1.891	-0.606	-2.231	-2.781	-2.481	-0.183	0.252	0.208	0.159	0	-0.922	0.007	-2.401	0.481	0.208	-0.284	-1.55	0.404
class-specific genes	1570026_at	CPXM2	-0.337	-1.103	0.694	-0.59	0.741	-1.183	0.996	-1.183	1.003	0.78	0.001	-1.386	-1.6	-2.618	-1.46	0.544	-0.742	-1.971	-0.691	-1.597	-2.086	-1.107	-0.592	-0.665	-0.101	0.861	0.653	0.351	-2.155	-1.551	-1.204	-0.887	-0.044	-0.585	-1.49	-0.976	-0.233	0.784	-0.077	-2.055	-0.518	0.893	0.723	-1.878	-0.965	-0.242	-0.278
class-specific genes	212187_x_at	PTGDS	-0.236	0.501	-0.226	0.02	-0.983	0.122	0.321	0.155	0.102	-0.408	-0.7	-0.105	-0.195	-0.144	-0.397	0.726	-1.35	-0.185	-0.339	-0.994	0.055	-0.364	1.523	0.386	-1.159	-1.006	-1.441	-1.275	0.336	-1.072	-0.511	0.17	0.144	-1.906	0.245	-0.546	0.378	-0.119	2.94	-0.454	-0.924	0.272	-0.382	0.452	-0.219	-0.845	-0.371
class-specific genes	211571_s_at	VCAN	0.115	-0.676	-0.037	0.399	-3.979	-0.248	-0.044	-0.958	-0.377	-1.245	0.027	-1.015	-1.221	-0.029	-0.15	-0.969	-0.441	-1.57	-0.562	0.437	-0.33	-1.168	-0.481	-0.25	0.952	-0.64	-0.101	0.32	0.249	-0.069	0.01	-0.514	-0.63	-1.383	-0.804	-0.797	-1.508	-0.636	-1.523	-0.59	0.095	-2.846	0.126	-0.004	0.655	-0.429	-0.268
class-specific genes	227860_at	CPXM1	-0.141	-0.206	-0.183	0.125	0.324	-0.492	0.083	-0.553	-1.062	-1.408	0.507	0.308	-0.646	0.264	-0.07	0.185	-0.374	-0.424	0.272	0.866	-0.041	-0.154	-0.046	0.824	0.271	0.314	-0.669	0.882	-0.833	0.001	0.125	1.915	-0.527	0.88	-1.291	-0.453	1.112	-0.142	-2.021	0.648	-0.741	1.607	-0.399	0.685	0.082	-1.867	-0.172
class-specific genes	205624_at	CPA3	-0.549	0.017	0.163	-0.101	-0.418	0.538	0.34	-0.282	0.488	0.803	0.718	-0.068	-0.201	-0.582	0.103	-1.034	-1.075	0.336	-0.025	0.193	-0.857	0.417	-1.588	-0.446	-0.676	-0.497	0.357	0.389	0.461	0.306	0.003	-1.594	-1.02	-0.169	2.78	0.067	0.314	0.081	-1.424	-0.647	-0.322	-2.917	0.085	-1.033	-0.057	0.57	-0.141
class-specific genes	1566433_at	PLD4	0.426	-0.985	1.165	0.105	-0.058	0.64	-0.7	-0.676	0.111	-1.001	-0.403	1.415	1.055	0.068	-1.475	-0.616	1.248	1.42	-0.383	0.071	-0.325	1.516	-0.793	0.124	1.548	1.498	-0.856	0.412	0.885	-1.453	-0.7	1.528	-0.234	0.148	-0.165	-0.752	-0.508	3.044	-0.762	-0.885	1.454	0.586	0.014	-1.324	-0.54	-0.26	-0.691
class-specific genes	201744_s_at	LUM	-0.628	-0.613	-0.6	-0.269	-0.036	-0.908	0.002	-1.262	-0.446	-1.151	0.237	-0.742	-1.28	-0.142	-0.507	-1.471	-0.462	-1.429	-0.426	-0.69	-0.827	-0.446	0.498	-0.236	-1.576	-0.395	-0.92	-1.811	0.112	-0.995	-0.011	-0.155	-1.098	-1.164	-1.7	-1.651	-0.784	-0.256	-1.479	-0.829	0.048	-0.889	0.16	-0.272	-0.464	-2.025	-0.044
class-specific genes	228224_at	PRELP	-1.536	-1.785	-1.093	0.64	-0.782	-0.558	-0.773	0.647	-0.122	-1.605	-1.059	-0.193	-1.106	0.612	-0.632	-0.071	-1.834	-0.524	0.045	0.015	-1.734	0.126	0.767	0.263	-1.273	-0.788	-0.86	-1.064	-0.013	-1.502	-1.198	1.448	-0.643	0.329	-1.167	0.45	1.271	-0.991	-0.572	-1.246	0.128	-0.461	0.298	-1.175	0.304	-0.961	0.696
class-specific genes	201842_s_at	EFEMP1	-0.956	-1.306	-0.805	-0.145	-0.511	-0.576	0.304	-0.576	0.21	-1.522	-0.123	-0.724	-1.093	0.458	-0.402	-0.088	-0.645	1.542	0.214	0.224	-0.56	-1.604	0.477	0.262	-0.089	-0.769	0.516	-1.104	0.66	-1.784	-0.695	-1.266	-0.787	-1.515	-1.357	-0.934	-0.821	-0.252	-2.103	-0.999	-0.479	-0.879	-0.194	-1.159	-0.271	0.155	0.378
class-specific genes	205404_at	HSD11B1	-0.738	-0.332	-0.614	0.158	0.146	-0.534	0.118	-1.381	-0.586	-1.676	0.142	-0.671	-1.722	-0.373	-0.728	-2.007	-1.581	-0.755	-0.489	-0.801	-2.974	-0.342	0.303	0.742	-0.756	-0.905	-0.452	0.064	0.689	-1.253	-0.263	-0.439	-0.212	-0.611	-0.841	-0.07	-0.148	-0.262	-0.675	-0.803	-0.595	0.202	0.079	-1.206	-0.039	0.321	-1.306
class-specific genes	205422_s_at	ITGBL1	-0.572	-3.214	-1.799	0.356	-1.872	-2.593	-0.744	-0.726	-0.474	-1.053	0.289	-0.711	-2.634	0.654	-0.577	-0.582	0.334	-0.337	-0.166	0.614	-0.74	-0.797	0.533	-1.239	-0.708	-1.441	-0.675	-1.561	-0.095	-1.02	-0.534	-0.381	-1.641	-0.236	-0.576	-1.629	0.081	-0.083	-2.008	-2.337	-0.102	-0.906	-0.329	-0.095	-0.58	1.196	-2.256
class-specific genes	210997_at	HGF	-2.617	-1.245	-3.341	-0.071	-1.666	-0.088	-0.729	-1.366	-0.486	-1.548	-0.22	-0.926	-1.129	0.173	0.088	0.458	-0.068	0.708	0.122	0.431	-0.157	-0.385	0.181	0.571	0.717	0.222	0.108	0.225	0.173	-0.311	-1.316	-0.047	-0.678	-0.047	0.883	-0.857	-0.393	-0.784	0.508	-2.068	0.374	0.511	-0.359	-1.26	-1.059	-0.041	-0.103
class-specific genes	229584_at	LRRK2	-0.99	-0.494	-2.044	-0.125	0.491	-2.162	-0.428	-0.076	0.091	-0.504	-0.052	-0.771	-0.637	-0.138	-0.808	-1.651	0.94	1.565	-0.675	-1.03	1.287	1.589	0.362	-0.114	0.216	-0.158	0.082	1.044	0.287	0.721	-0.304	-2.33	-0.032	0.515	-0.455	-0.016	0.287	0.202	-0.25	-0.989	-0.181	-1.09	0.302	-0.645	-0.983	-0.714	0.215
class-specific genes	228186_s_at	RSPO3	-1.217	-0.731	-0.677	-0.002	-0.079	-0.474	0.275	-1.167	1.056	-0.837	-0.355	-0.745	-1.202	0.168	-0.892	0.501	-1.164	-0.844	0.12	-0.942	-1.053	-0.362	0.51	-0.024	-0.243	-0.055	-0.168	-2.086	0.173	-1.414	-1.081	0.91	-0.823	-0.854	-0.989	-0.419	0.433	-1.232	2.168	-1.874	-0.619	2.178	-0.017	-0.874	-0.697	-0.731	0.388
class-specific genes	217767_at	C3	-0.864	-1.501	-1.723	0.543	-0.174	-0.838	0.072	-0.829	-1.08	-1.582	0.429	-0.526	-0.796	0.773	-1.085	-0.407	-0.215	-0.383	0.182	-0.547	-1.67	-0.145	1.35	0.955	0.799	-0.48	0.904	0.999	0.782	-0.609	-1.312	-0.503	-0.968	0.823	0.174	-0.219	0.689	0.783	0.536	-0.681	-0.758	-0.221	0.027	0.202	0.499	0.33	1.21
class-specific genes	211062_s_at	CPZ	-0.235	-1.047	-0.22	0.062	-1.772	-0.327	-0.049	-0.358	-1.881	-0.816	-2.038	-1.413	0.02	0.918	0.416	-0.174	-0.576	-0.658	0.066	-1.227	-0.236	-0.59	-0.021	1.237	-0.576	-0.604	0.148	-0.004	0.733	0.279	0.605	-1.639	-1.733	-1.794	-0.622	-0.418	0.604	0.055	-0.812	-0.347	-1.238	0	-0.423	0.164	0.133	-0.447	0.851
class-specific genes	215536_at	HLA-DQB2	-1.154	-0.455	-1.936	-0.31	0.935	-0.513	-1.093	-0.906	0.488	-0.022	-0.623	-0.255	-0.237	-2.505	-1.281	-0.483	0.687	-0.677	-1.953	0.342	-1.093	0.049	-0.663	0.663	0.396	1.161	-0.925	-2.69	2.246	-1.003	-0.098	-2.331	-0.051	0.009	-0.027	0.066	0	1.462	0.416	-1.742	-0.2	0.019	-0.251	-0.049	-0.438	0.441	1.184
class-specific genes	218468_s_at	GREM1	-0.844	-0.748	-0.099	-0.268	-0.337	-0.378	0.488	-1.432	0.726	-0.563	-0.123	-0.329	-0.921	0.274	0.219	-0.479	-1.209	-0.296	-0.339	-0.304	-0.83	-0.324	0.686	-1.209	0.161	0.586	-0.32	-0.669	-1.037	-1.602	-0.402	-0.269	-1.51	-0.208	-1.564	-0.064	-0.196	-0.033	0.004	-1.128	-0.935	-0.216	0	-0.92	0.028	-2.302	-0.122
class-specific genes	201645_at	TNC	-0.434	0.294	0.281	0.434	-0.022	-0.465	0.355	-0.11	0.648	-0.502	-0.16	-0.513	-0.786	-0.493	0.297	0.058	0.117	-1.502	0.246	0.587	-0.767	-0.22	0.163	-0.415	0.181	-0.269	-0.236	-0.37	0.054	-0.195	-1.234	-0.422	-1.191	-1.874	0.736	-0.505	-1.18	-0.059	0.426	-1.672	-0.865	-0.696	-0.542	0.335	-0.555	-0.759	0.196
class-specific genes	206049_at	SELP	-1.26	-0.589	-0.334	0.143	-1.473	0.236	0.366	-0.136	-0.57	-0.749	-0.417	-0.938	-1.102	-2.094	-0.455	-0.162	-1.495	-2.193	-0.896	-0.394	-2.116	-0.142	-0.017	0.381	0.359	-0.069	0.345	-1.691	0.485	-1.206	0.504	0.152	0.155	0.223	-0.253	0.12	0.176	1.014	-0.211	-0.814	-0.322	0.048	0.716	-0.801	-0.01	-1.005	0.077
class-specific genes	210702_s_at	PTGIS	-0.973	-1.318	-0.441	-0.446	-1.143	-0.746	-0.118	-0.777	1.395	-0.869	0.374	-2.582	-1.855	-2.163	-1.054	0.493	-0.579	-0.456	-1.733	0.403	0.14	-0.21	-0.741	0.409	0.926	1.409	1.062	-1.89	0.87	-0.708	-0.74	-1.422	-0.181	0.993	-0.21	0.371	-1.097	-0.434	-1.181	-2.497	-2.225	0	-0.288	-1.167	-0.253	1.072	0.671
class-specific genes	222934_s_at	CLEC4E	-0.453	-0.866	-0.664	0.31	1.339	-1.136	0.048	-2.706	0.198	-0.597	-0.42	-0.914	-3.17	0.123	-0.113	-0.699	-1.044	-0.258	-1.062	-0.688	-0.542	-0.503	-0.88	-0.286	0.382	0.29	-0.178	0.81	0.208	-1.695	0.287	-0.526	0.468	-0.088	-0.176	-0.056	0.173	-0.046	-0.093	-0.325	-0.424	0.566	-2.515	0.135	0.143	-0.373	0.76
class-specific genes	xxx	NA	NA	NA	NA	NA	NA	NA	NA	NA	NA	NA	NA	NA	NA	NA	NA	NA	NA	NA	NA	NA	NA	NA	NA	NA	NA	NA	NA	NA	NA	NA	NA	NA	NA	NA	NA	NA	NA	NA	NA	NA	NA	NA	NA	NA	NA	NA	NA
class-specific genes	230275_at	ARSI	-0.5	0.809	-1.772	0.352	-0.087	0.049	0.212	-1.033	-0.704	-0.762	0.299	-1.553	-1.946	-0.578	-0.975	-1.672	-1.567	-2.289	-0.535	-1.029	-2.54	-0.196	-0.157	1.957	-0.582	0.214	-1.022	-0.811	-1.432	-1.089	0.773	-0.073	0.725	-1.895	0.715	-0.413	-0.617	-0.073	-1.361	-1.117	1.121	-1.439	-0.765	0.532	0.181	-0.842	-0.697
class-specific genes	1554819_a_at	ITGA11	-0.265	-2.175	0.301	0.25	-2.497	-1.253	0.061	-2.317	0.915	-2.394	-1.333	-2.341	-2.704	-0.057	-0.346	0.104	-0.624	-2.907	-1.034	0.141	-0.118	-0.329	-0.832	-0.399	-0.143	0.447	0.729	0.631	-0.363	-1.64	-0.054	-1.841	0.446	-1.298	-0.265	0.38	-1.488	-1.208	1.205	-0.563	0.076	0.062	-1.256	0.395	0.692	0.102	-1.125
class-specific genes	202238_s_at	NNMT	-0.671	-0.754	-0.616	0.177	-0.632	-0.437	-0.229	-1.158	0.998	-1.088	0.348	-0.546	-0.856	0.572	-0.025	-1.133	0.972	-0.637	0.196	0.325	-0.518	-1.359	1.033	-0.01	0.315	0.146	1.079	0.172	0.274	0.492	-0.572	-0.792	-0.927	-0.403	0.41	0.055	-0.498	-0.294	0.089	0.054	-0.782	-0.496	-0.265	0.001	1.586	0.021	-0.023
class-specific genes	206407_s_at	CCL13	-0.276	0.214	0.222	-0.387	0.661	0.09	0.863	-2.164	0.32	-0.106	-0.691	0.051	-0.041	-0.86	0.245	-0.36	0.017	-0.635	0.363	-0.349	-1.755	-1.089	0.049	-0.775	-1.105	-0.906	-1.395	0.023	0.278	-0.366	0.373	-0.208	1.06	-1.09	0.728	-1.684	0.38	-1.345	-2.067	0.289	-1.46	-1.519	-1.056	0.638	-0.205	-1.216	0.475
class-specific genes	209496_at	RARRES2	-0.31	-0.258	-0.506	-0.022	-0.378	-0.333	-0.068	-0.136	-0.062	-0.984	0.783	-0.248	-0.069	0.369	0.015	0.156	0.181	-0.513	0.193	-0.15	-0.157	0.812	0.684	1.1	1.133	-0.355	0.759	1.107	1.157	0.501	-0.51	1.28	-1.155	1.22	-1.123	-0.908	0.131	-0.425	1.981	-1.527	-0.042	1.22	0.191	0.088	0.366	0.659	-0.404
class-specific genes	226944_at	HTRA3	-0.759	-0.34	-0.226	0.26	0.43	-2.332	0.422	-0.191	1.068	0.215	0.198	-0.511	-0.666	0.643	-0.282	-0.159	-0.068	-1.722	-0.06	0.223	-2.11	-2.086	0.197	1.002	1.478	1.832	0.857	-0.83	-0.196	0.887	1.419	-1.645	0.535	-0.928	-0.937	-0.225	0.879	0.175	-0.454	0.225	0.783	-1.335	0.656	0.088	0.295	-1.952	-0.245
class-specific genes	209686_at	S100B	1.376	0.379	0.963	-0.649	-0.23	-0.247	1.19	-0.673	-0.518	-0.807	-0.181	0.391	-0.696	0.313	0.7	1.057	-1.276	-1.736	-0.612	-1.011	-1.587	0.754	0.162	2.188	-0.688	0.171	0.253	-0.912	-1.152	0.047	1.22	-0.397	-0.388	-1.081	-0.198	-0.169	-0.786	0.061	-0.312	-1.253	-0.316	-0.057	-0.53	-1.566	-0.53	0.069	1.935
class-specific genes	220580_at	BICC1	-0.645	-1.199	-0.225	-0.283	0.121	-0.807	-0.363	-0.815	-0.011	-0.358	-1.303	-2.221	0.926	-2.052	-1.123	-0.425	-1.382	-3.1	-1.834	-0.781	-0.661	1.485	0.883	0.464	0.905	-0.265	-0.945	1.516	-0.545	-1.728	0.257	-1.511	0.132	-0.292	-0.115	-0.638	0.077	-2.618	-1.843	-1.682	-0.509	-1.132	0.661	0.321	0.383	0.023	0.357
class-specific genes	206856_at	LILRB5	-2.074	0.561	-0.452	-0.962	-1.493	0.322	0.43	0.267	-0.471	-0.591	-2.019	-0.637	-0.325	-2.12	-0.456	0.141	-1.809	-2.1	0.158	-0.351	-0.235	-0.794	0.179	-0.893	-0.105	-0.605	-0.322	-2.569	-1.945	-0.161	0.394	-1.938	-0.37	0.314	0.391	-0.436	0.177	-1.55	-2.277	-0.395	0.652	-1.048	-0.198	-1.044	-1.152	-1.31	0
class-specific genes	202437_s_at	CYP1B1	-1.272	-1.107	-1.197	0.194	-0.074	-0.707	-0.087	-0.949	0.401	-0.808	1.26	-1.245	-0.771	-1.042	-1.332	-0.566	0.021	-1.121	-0.066	0.013	-1.834	-0.386	0.163	-0.399	-0.955	-0.689	1.601	1.164	0.109	-1.441	-0.717	-0.728	-1.162	-0.261	-1.147	1.616	-0.393	0.357	-1.043	-0.208	-0.24	-0.552	0.434	-1.251	-0.338	-1.699	0.018
class-specific genes	226769_at	FIBIN	-0.653	-1.125	-0.892	0.224	-0.773	-0.762	-0.413	-0.664	0.602	-1.698	-0.079	-1.13	-1.496	0.751	-0.337	-1.619	-0.732	-0.931	-0.196	-0.13	-1.272	0.277	0.333	0.013	-0.702	-1.337	-0.055	0.662	-0.602	0.022	0.125	0.019	-0.946	0.407	-1.919	-0.578	1.113	0.07	-0.874	-0.132	-0.093	0.085	-0.057	-0.61	-0.676	0.152	-0.103
class-specific genes	208335_s_at	DARC	-0.534	-0.427	-0.439	0.412	0.336	0.29	0.643	-0.307	0.421	-1.068	-1.593	0.243	0.064	0.248	0.164	0.101	-1.429	-0.145	0.39	-0.601	-1.243	-0.611	-0.933	-0.129	0.839	0.227	0.541	-1.357	0.378	-0.336	1.182	-0.331	-0.728	-0.212	0.538	-0.54	-0.525	0.804	-0.481	-0.989	-0.255	-0.805	0.431	-0.713	0.06	-1.366	0.719
class-specific genes	205987_at	CD1C	-0.303	-0.672	0.172	-0.519	-0.684	1.157	0.382	0.138	0.144	-1.845	0.513	0.039	-0.041	-0.584	-1.435	-0.617	-1.123	-1.23	-0.297	-0.872	-3.191	-0.947	-0.163	0.883	0.382	1.24	-1.6	-1.414	-0.654	-0.621	1.582	-1.325	0.757	0.839	0.545	0.44	0.851	1.762	0.937	-0.233	-1.145	-1.723	-0.642	-0.074	0.633	-1.177	1.487
class-specific genes	203290_at	HLA-DQA1	-0.815	-0.265	-0.731	-1.518	1.292	0.821	1.386	0.911	1.003	1.073	1.192	0.91	1.107	-0.342	-0.953	-0.735	-1.371	1.032	-0.429	-1.574	0.315	-0.426	-1.104	0.06	-0.776	-0.797	-0.184	-0.561	1.621	-1.555	-1.057	0.354	-0.631	-0.894	-0.199	1.209	-0.954	1.317	1.428	0.848	1.384	-0.849	1.43	0.597	0.859	1.645	-0.14
class-specific genes	219463_at	C20orf103	-2.066	-2.059	-1.132	0.297	-1.488	-0.346	-0.34	-1.889	1.267	-1.08	0.786	-1.376	-0.6	0.802	-0.245	-0.33	0.115	-1.225	-1.088	-0.613	-2.653	1.551	-1.41	-0.124	0.943	0.202	-0.054	-0.881	-0.454	0.026	0.37	-0.614	0.798	-1.174	-0.961	-0.749	0.642	-0.898	-2.836	0.379	-0.03	-0.413	-0.151	1.443	1.779	1.677	0.214
class-specific genes	205237_at	FCN1	-1.314	-4.382	-1.049	0.025	0.626	-0.863	0.707	-0.152	0.417	-0.817	0.382	-1.582	-0.787	-1.073	-1.399	-0.356	-1.57	-0.999	-0.577	-1.099	-0.369	-1.187	-0.627	0.454	0.165	-0.712	0.6	1.08	-1.012	0.202	1.225	-0.345	-0.415	0.131	0.072	0.033	0.242	1.106	-2.097	-1.981	-1.676	-0.718	-0.377	-0.8	-2.002	-2.183	-0.215
class-specific genes	223121_s_at	SFRP2	-0.914	-2.208	-0.955	0.27	-0.715	-0.192	0.076	-0.436	0.158	-1.267	0.38	-1.714	-1.937	0.126	-0.302	-1.31	-0.06	-0.703	-0.015	-0.177	-0.396	-0.356	0.074	0.018	1.419	-0.006	1.558	1.053	0.961	-1.022	-0.145	0.953	-0.274	-0.288	-0.57	-0.181	-0.323	-0.076	0.682	-0.42	-0.152	-0.077	0	1.212	-1.071	-0.597	-1.187
class-specific genes	215784_at	CD1E	0.088	-1.649	0.276	0.688	0.509	0.566	-1.488	-1.542	-1.497	0.267	-0.098	0.22	0.531	-0.238	0.687	-0.001	-0.64	-1.099	-0.638	-1.119	-2.218	0.71	-0.765	-1.488	0.227	-0.651	0.254	-0.85	0.139	-0.211	1.091	-1.18	0.319	-1.849	-0.158	0.194	-1.041	-0.595	-0.266	-0.461	-1.534	0.438	-1.624	-2.37	-0.977	-1.484	1.175
class-specific genes	204879_at	PDPN	-0.628	-0.147	0.294	0.055	0.152	0.295	0.15	-1.619	-0.724	-1.882	1.049	-1.297	-0.62	0.499	-0.049	-2.475	-4.416	-0.638	-0.603	-0.325	-2.027	-1.275	0.022	0.683	-0.419	-0.488	0.024	-1.086	-0.989	-1.701	-0.45	-3.068	-0.495	-0.648	-0.528	0.08	0.108	-0.108	-2.473	-0.965	0.029	0.13	-1.35	-0.485	-0.381	0.521	0.127
class-specific genes	232458_at	COL3A1	-0.966	-1.523	-0.791	-0.293	-0.426	-0.577	-0.291	-1.108	-0.219	-1.112	0.719	-1.404	-1.718	-0.401	-0.275	-0.66	-0.139	1.214	0.307	0.078	0.186	-1.161	-0.009	-0.008	-0.688	0.314	-1.527	-2.695	0.275	-1.369	-0.475	-0.564	-0.874	-2.221	-1.41	-0.837	-0.176	-0.726	-2.588	-1.267	-0.101	-0.97	-0.445	-0.598	-0.5	-1.697	0.134
class-specific genes	228056_s_at	NAPSB	-0.339	1.159	-0.672	0.087	1.304	0.137	1.295	0.575	1.464	-0.56	-0.35	-0.063	0.309	1.145	0.073	0.828	-0.681	0.593	-0.006	0.092	0.133	0.998	0.571	1.664	1.391	0.624	0.13	1.177	0.966	0.569	-0.294	-0.716	1.545	-0.248	0.511	0.97	-0.453	1.545	-0.226	1.708	0.279	-1.094	0.388	0.887	1.265	-0.19	1.573
class-specific genes	238426_at	TMEM130	1.004	-0.568	0.578	-1.018	-0.013	1.178	0.387	-0.507	-0.297	-0.711	0.387	-1.862	-1.166	-1.307	-0.684	0.989	-1.416	-1.399	-1.797	-1.399	-0.986	-0.716	1.003	1.026	1.139	-0.006	0.762	-1.264	-0.485	-2.009	0.007	0.256	-0.483	-1.454	-1.462	0.595	0.809	-0.547	-0.483	-0.52	-0.369	-0.396	1.297	-1.204	-0.96	-0.85	0.105
class-specific genes	204359_at	FLRT2	-1.452	-1.49	-0.803	0.277	-2.644	-0.281	0.039	-0.62	-0.476	-1.391	0.156	-0.625	-1.438	0.019	-0.178	-0.694	-1.129	-0.902	-0.293	-1.168	-0.999	-0.439	0.198	0.599	-0.313	-0.503	-2.735	-2.126	-0.383	-0.059	0.362	-1.484	1.128	-2.358	-0.618	0.21	0.651	0.172	-2.162	-0.132	-0.346	-0.453	-0.588	-1.181	-0.448	-0.095	-0.305
class-specific genes	213068_at	DPT	-0.773	-1.439	-2.804	-0.13	0.061	0.124	-0.247	0.423	-0.611	-0.726	0.097	-1.099	-1.436	0.224	-0.883	0.052	-0.559	-0.623	0.513	0.052	-1.305	-1.414	0.765	0.452	0.496	-0.982	0.499	-0.991	-0.421	-0.938	-0.623	-1.5	-0.89	0.039	-1.066	-0.137	-0.992	-1.469	-1.661	-0.87	0.332	0.22	-0.3	-1.964	-0.35	-0.284	0.34
class-specific genes	210004_at	OLR1	-1.541	-0.963	-0.537	0.116	0.197	-0.742	0.011	-1.66	0.564	-1.118	0.402	-1.869	-1.447	-0.289	0.074	-0.778	0.486	0.712	-0.349	1.446	1.68	1.308	0.131	-0.244	0.999	0.499	0.695	1.033	-0.012	0.499	-0.259	-0.632	-0.484	-0.121	-0.193	-0.285	0.143	1.515	-0.205	-1.383	-0.463	-0.616	1.354	-0.415	0.085	-0.422	-0.114
class-specific genes	216233_at	CD163	-2.478	0.717	-2.078	0.221	1.146	-1.75	0.147	-0.634	0.648	-2.401	-1.292	-0.839	-1.025	-0.944	-0.266	-2.037	-1.583	-0.023	-0.105	-0.511	-0.141	-0.052	0.163	-1.508	0.068	0.137	0.282	0.077	-0.378	-0.181	-1.295	-1.888	0.98	-1.734	-0.888	0.995	0.485	0.123	-0.912	0.128	-1.728	0.705	0.461	-1.724	1.161	1.162	-1.128
class-specific genes	203083_at	THBS2	-1.142	0.707	-0.865	0.037	-0.543	-0.643	-0.167	-2.065	0.269	-1.553	0.478	-1.364	-1.53	0.479	-0.063	-0.838	-0.295	-0.599	0.097	0.565	-1.014	-0.8	-0.431	-0.037	-0.289	-0.2	-1.193	1.004	-0.737	-1.242	-0.138	-0.636	0.15	-1.548	-1.657	-0.827	-0.412	-0.163	-1.666	-0.86	-0.137	-0.342	0.034	-0.098	-0.411	-0.833	0.137
class-specific genes	206026_s_at	TNFAIP6	-1.048	-1.437	-0.518	0.289	0.355	-1.874	-0.313	-3.03	-0.425	-0.387	0.271	-1.345	-2.26	-0.204	-0.652	-0.514	-0.377	-0.458	-0.749	0.092	-0.796	0.04	-0.129	0.189	-0.192	0.684	0.044	0.626	0.215	1.184	-0.035	0.593	-0.652	-0.838	-1.347	1.891	0.197	-0.237	-1.115	-0.732	0.07	0.815	-0.007	0.17	-0.42	-0.637	0.13
class-specific genes	209395_at	CHI3L1	-0.76	-0.02	-0.198	0.481	0.776	-0.452	-0.31	-0.521	0.528	-0.65	-0.563	-0.278	-0.365	-0.023	-0.061	-0.592	-1.303	-0.623	-0.672	-0.23	-1.135	-0.226	0.751	-1.237	0.356	-0.275	0.777	1.167	0.613	-0.572	-0.969	0.788	-2.721	1.26	0.309	0.976	1.19	0.453	1.396	0.477	-0.525	1.556	-0.673	-0.483	-0.08	0.437	-0.363
class-specific genes	xxx	NA	NA	NA	NA	NA	NA	NA	NA	NA	NA	NA	NA	NA	NA	NA	NA	NA	NA	NA	NA	NA	NA	NA	NA	NA	NA	NA	NA	NA	NA	NA	NA	NA	NA	NA	NA	NA	NA	NA	NA	NA	NA	NA	NA	NA	NA	NA	NA
class-specific genes	211813_x_at	DCN	-0.874	-1.075	-0.505	0.208	-1.712	-0.213	0.005	-0.72	-1.42	-1.302	-0.352	-1.269	-1.124	-0.221	-0.189	-0.499	-0.858	-1.504	-0.399	-0.011	-0.465	0.123	0.94	-0.01	-1.309	-0.141	-1.061	-1.607	0.035	-1.156	0.021	-1.147	0.188	-1.998	-0.639	-1.138	-0.671	-0.37	-2.617	-0.971	-0.627	-1.466	-0.107	-0.466	0.034	-1.099	0.339
class-specific genes	243697_at	MOXD1	-0.398	0.603	-0.368	0.633	-0.537	0.632	0.436	-0.11	-1.686	-0.056	0.292	-0.476	-0.018	0.236	-1.844	0.365	-1.011	-2.458	-0.486	-0.194	-0.024	0.322	0.797	-1.112	1.033	-0.437	1.283	-0.013	-1.464	-3.403	-1.782	-2.293	0.653	-1.057	-0.861	0.544	-1.462	0.246	-0.069	-2.17	0.027	-1.181	-0.009	0.023	0.808	-0.562	-0.272
class-specific genes	212353_at	SULF1	-0.657	-1.209	-0.492	0.523	-0.235	-0.549	0.322	-1.849	0	-1.202	0.222	-0.816	-1.076	0.576	-0.3	-1.697	0.937	-0.963	-0.146	0.989	-0.773	-0.838	-0.758	-0.374	-1.103	-1.158	-0.701	-1.685	0.507	-0.013	-1.099	0.897	-0.752	-0.644	-3.08	-1.192	0.043	-0.301	0.947	0.469	0.054	-0.808	0.606	0.783	0.52	-0.414	-0.48
class-specific genes	204338_s_at	RGS4	-0.771	-1.531	-0.227	0.308	-0.01	1.008	-0.279	-1.152	0.422	-0.51	0.538	-1.901	-1.901	-0.029	-0.665	0.755	-2.419	-0.196	-0.069	0.38	-0.193	-0.853	-1.341	0.961	-0.664	-0.11	-0.975	-0.252	0.027	-1.273	-1.503	-0.991	0.693	-1.081	-0.937	-1.838	0.649	1.001	-1.06	-1.333	0.52	-1.12	0.239	0.123	0.389	-1.621	-0.011
class-specific genes	224396_s_at	ASPN	-0.712	-0.552	-0.456	0.024	-2.913	-0.338	0.01	-0.381	-0.239	-0.972	0.366	-1.122	-0.959	-1.797	-0.264	-0.772	-1.115	-1.495	-0.577	0.709	-0.066	-1.504	-2.912	-0.254	-1.634	-0.001	-0.047	-0.32	-1.126	-2.824	-1.199	0.122	0.205	-0.825	-1.347	-1.724	-1.407	-0.704	0.088	-1.593	0.173	-1.085	-1.604	-0.873	0	-1.163	0.495
class-specific genes	226930_at	FNDC1	-1.071	-1	-0.777	0.081	-0.568	-0.32	-0.021	-0.875	-0.195	-1.355	0.63	-0.897	-1.398	0.452	-0.338	-1.056	-0.485	-1.181	-0.208	0.447	-0.522	-2.084	-1	-0.58	-1.176	-0.175	-0.497	0.041	0.323	-0.189	-0.742	-1.011	-0.333	-2.149	-0.971	-0.366	0.494	0.073	-1.513	-0.632	0.27	-0.746	0.082	0.97	0.08	-2.827	0.293
class-specific genes	212942_s_at	KIAA1199	0.487	0.889	0.294	-0.413	-1.969	-1.134	-0.025	-0.655	-1.481	0.206	-0.265	0.243	1.006	-1.054	-0.002	-1.115	0.467	-1.477	-1.14	1.173	-1.332	-0.121	0.594	-0.702	-1.443	-0.641	-1.471	-0.621	0.156	-3.201	-0.424	0.274	1.407	0.638	-0.352	0.389	-0.69	-0.496	0.817	-1.887	0.687	-0.308	-0.483	0.122	1.477	1.082	0.501
class-specific genes	210511_s_at	INHBA	0.06	-1.572	-0.677	0.408	0.096	-0.831	-0.066	-1.201	-0.17	-0.864	0.782	-0.93	-0.781	0.809	0.163	-1.567	0.423	-0.056	0.062	0.936	-0.21	-0.786	-0.484	-0.296	-0.394	0.082	-0.328	-2.157	0.256	-0.768	-2.027	-0.288	-0.292	-1.199	-1.47	-1.669	-1.427	0.449	-1.264	-0.851	-0.267	-0.618	0.358	-0.104	0.94	-0.092	0.507
class-specific genes	1554195_a_at	C5orf46	-1.311	-0.737	0.077	-0.241	-0.47	-0.426	-0.247	-0.873	-0.156	-1.221	1.368	-1.898	-0.962	1.071	-0.054	-1.652	0.575	-0.444	-0.513	0.423	-2.034	-0.913	0.198	1.341	1.837	-0.28	2.267	-0.201	0.371	-1.537	-0.683	1.231	-0.522	-0.13	0.907	-0.238	0.733	1.642	-0.952	0.044	0.269	0.385	0.527	-0.095	0.984	-0.351	-0.536
class-specific genes	205959_at	MMP13	0.3	-1.207	-1.207	1.448	0.556	-0.662	-0.647	-0.331	1.538	-0.413	0.485	-1.215	-1.057	-1.083	-1.015	-0.69	-0.654	-0.527	-0.049	0.09	1.214	-0.322	0.098	-0.468	0.305	-0.002	0.162	-1.456	-0.002	-0.401	-1.348	0.687	-0.206	-0.983	-0.161	0.118	1.193	-0.691	-0.7	-1.557	-0.212	0.2	-0.674	-0.996	-0.405	0.237	-0.133
class-specific genes	244694_at	IGLON5	-1.642	1.311	-0.088	-0.842	-0.699	0.584	0.049	-0.763	-0.638	-0.101	-0.14	-0.785	-1.534	-0.842	-0.34	1.201	-1.202	-0.787	0.756	0.708	-1.232	-0.998	2.823	0.042	-0.267	2.243	-0.401	-1.153	2.106	-0.687	-0.889	-0.778	-0.057	0.84	1.431	-0.403	0.47	0.467	1.899	-0.554	0	-0.297	-0.109	1.616	0.231	0.404	0
class-specific genes	202628_s_at	SERPINE1	-0.627	-0.936	-0.454	0.617	-0.143	-2.342	-0.001	-1.112	0.484	-1.256	0.225	-0.527	-0.589	-0.249	-0.215	-0.581	-0.239	0.248	0.096	0.684	-0.074	-1.637	0.779	0.329	-0.054	0.065	1.161	-0.586	-0.479	-0.565	-0.185	0.439	-0.723	-1.682	-1.811	0.448	-0.804	0.654	-1.558	-2.07	0.619	-0.774	0.198	-1.09	0.598	0.096	-0.856
class-specific genes	203876_s_at	MMP11	0.609	-0.483	0.72	0.427	-0.841	0.353	0.224	-0.528	0.348	-0.34	-0.399	0.175	0.327	1.177	1.335	-0.168	0.055	-0.058	0.257	0.429	-0.136	1.282	-1.382	-0.532	0.627	-0.455	-0.157	0.188	-1.346	-1.119	-0.816	0.579	-0.932	-0.662	0.045	0.13	0.12	-0.453	-1.313	-0.728	0.587	0.067	0.511	1.037	0.8	-0.271	-0.023
class-specific genes	202310_s_at	COL1A1	-0.313	-0.512	-0.072	-0.018	-0.972	-0.548	0.063	-1.465	0.02	-0.94	1.106	-1.001	-0.694	0.349	-0.006	-0.917	-0.292	-1.072	-0.117	-0.256	-0.152	-0.967	-0.487	-0.315	-1	-0.001	-0.238	-0.751	-0.117	-0.099	-0.044	-0.591	-0.597	-2.501	-0.889	-1.527	0.1	0.525	-2.69	-0.926	0.049	-0.627	-0.427	0.525	0.008	-0.447	-0.119
class-specific genes	205817_at	SIX1	-0.892	-0.83	-0.931	0.089	1.935	0.523	-0.391	-1.267	0.261	-1.322	0.154	-0.738	-1.086	-0.716	-0.772	0.211	-0.013	1.128	1.167	0.884	0.275	1.389	0.859	0.668	0.334	-0.499	0.369	0.003	1.077	-1.168	-0.647	0.85	-0.993	-0.634	-1.083	0.574	0.307	0.616	0.208	-1.206	1.206	1.118	0.031	1.154	-1.007	-1.337	1.068
class-specific genes	204475_at	MMP1	-0.568	-0.285	-0.015	0.082	1.161	-0.607	0.155	-0.914	1.795	-0.075	0.703	-0.447	-0.728	0.027	0.293	-1.805	-0.869	-0.823	0.25	1.478	-0.647	-0.861	-0.808	-0.688	0.099	-0.08	0.026	-0.815	0.492	-0.25	2.36	-0.024	2.468	-0.557	-0.262	-0.079	-0.415	0.481	-0.471	-0.374	0.42	1.41	-0.731	-0.368	-0.845	0.062	0.435
class-specific genes	223278_at	GJB2	0.086	-0.039	-0.611	-0.543	-0.848	0.507	0.651	-1.31	0.25	-0.916	0.634	-0.759	-0.316	0.039	0.022	-1.059	-0.449	-2.035	-0.342	-0.432	0.001	0.046	0.651	-0.097	-0.515	0.006	1.607	0.025	-0.632	0.659	0.519	-0.492	0.159	-1.948	-0.256	-0.402	-0.728	-0.117	-1.19	-0.873	1.43	-0.434	-0.666	0.169	-0.026	1.22	0.14
class-specific genes	236028_at	IBSP	-0.325	-2.09	0.184	0.116	0.569	-2.09	-1.607	-0.403	-0.882	0.035	0.119	-0.802	-0.878	0.125	0.052	-0.281	0.231	-0.611	0.241	0.72	0.954	-0.955	0.548	1.026	-1.378	1.056	0.029	0.061	-1.162	-2.185	-1.326	-0.755	-1.291	0.97	-0.965	-0.211	0.356	0.474	-1.928	-0.203	0.3	-1.157	0.043	0.476	0.477	0.415	-1.051
class-specific genes	226997_at	ADAMTS12	0.161	-1.68	0.053	0.282	-1.058	-0.098	0.752	-1.731	-0.247	-1.628	-0.095	-0.478	-0.448	0.428	0.27	-0.088	-0.353	-1.861	-0.232	-0.122	-0.997	-0.752	-1.192	-0.56	-0.182	-1.106	-0.35	-1.365	-0.149	-0.242	-0.216	0.366	-0.475	-2.962	-0.348	-1.026	-0.834	0.303	-1.5	-2.757	-0.746	-0.514	-0.815	0.348	0.14	0.504	-0.696
class-specific genes	208394_x_at	ESM1	0.241	-0.521	-0.003	-0.329	0.681	-0.644	-0.536	-0.722	-0.421	0.291	0.803	-1.779	-0.098	0.214	-0.662	-1.488	0.04	-1.535	-0.228	-1.116	-0.391	-1.802	-0.93	0.626	-0.125	0.065	0.622	-2.228	0.525	1.075	0.377	0.734	1.105	0.129	-1.584	-0.936	0.406	0.323	0.378	-0.601	0.191	0.008	-1.511	0.963	0.085	0.743	-0.516
class-specific genes	222862_s_at	AK5	-1.545	-0.588	-1.492	1.154	-0.1	-0.136	-0.157	-0.76	0.191	-0.655	-0.344	-1.505	-1.518	1.022	-1.241	0.106	1.239	-1.755	0.169	-0.467	-0.296	2.567	-0.113	0.709	0.303	0.739	0.721	-0.339	-0.945	-1.974	0.327	0.163	1.918	-1.172	-2.114	-1.669	-0.62	1	-1.61	0.136	1.291	-1.082	0.142	-1.279	-1.055	-0.009	-0.83
class-specific genes	211756_at	PTHLH	-1.019	0.017	-1.807	0.219	-1.003	-0.254	-0.302	-1.154	0.214	-0.765	-0.323	-0.463	-1.719	-0.12	-0.255	0.609	1.927	-0.568	-0.946	-0.159	-0.408	-0.517	2.025	1.784	-0.272	-1.362	1.398	-0.943	0.145	-0.758	-0.389	-0.172	-0.888	-0.754	-2.826	0.038	-0.344	-0.291	0.047	-0.533	0.37	-0.08	0.454	-0.086	0.121	0.409	0.369
class-specific genes	227566_at	HNT	-0.592	-2.144	-0.449	0.123	-0.746	-0.465	0.419	-1.586	0.128	-1.358	-0.14	-1.193	-1.884	0.797	-0.374	0.392	-0.581	-2.389	-1.401	0.492	-2.142	-0.921	-0.466	-0.465	-1.101	-0.433	-0.433	-2.09	-0.967	-0.392	-0.993	-0.651	-0.397	-0.396	-0.628	-0.806	-0.405	0.576	-0.273	-1.15	-0.88	-0.331	0.76	0.857	0.954	-1.149	-0.447
class-specific genes	1568287_at	HMGA2	-2.32	-0.971	0.535	-1.222	1.177	0.164	0.64	-0.273	0.697	-0.911	0.775	-0.577	-2.745	-0.923	-2.822	0.04	-1.448	-1.99	-0.114	-0.759	-1.911	0.296	0.338	0.485	-0.965	0.421	0.393	-2.972	-0.336	-1.007	-0.394	0.158	0.728	-0.356	0.317	1.028	0.346	-0.631	0.716	-2.334	-0.634	-0.545	0.503	0.141	0.049	-0.615	-0.372
class-specific genes	240042_at	FIBCD1	0.491	0.922	1.61	0.1	1.946	-0.716	0.582	-1.291	-0.107	0.147	1.607	-0.135	1.034	-1.291	0.417	0.347	-0.77	0.104	0.385	-0.379	-0.71	0.06	-0.887	-0.025	0.383	0.428	-0.695	1.477	0.225	-1.616	1.441	-0.094	-0.059	-0.495	0.829	-0.115	-0.579	1.567	0.817	-1.296	0.252	-1.008	1.635	-0.232	1.589	-0.781	0.078
class-specific genes	213909_at	LRRC15	-1.408	-1.447	-1.478	0.012	0.204	-0.278	-0.256	-1.44	-0.612	-1.262	1.319	-1.66	0.152	0.053	-0.624	-2	0.163	-1.644	-0.571	0.332	-0.318	0.301	0.297	0.731	0.719	-0.179	-0.7	-1.028	0.778	-1.514	-0.685	0.077	-0.2	0.386	-0.578	-0.293	-1.356	-0.836	-0.286	-1.407	0.562	-0.245	-1.937	-0.158	0.675	2.852	0.047
class-specific genes	244584_at	C11orf41	-1.576	-0.463	0.659	-0.12	-1.143	-1.217	-0.234	-0.784	0.296	-2.064	0.023	-0.179	-2.11	-0.12	-2.413	0.071	-1.587	0.199	-1.453	-2.1	-1.579	-0.233	-0.413	-0.473	1.095	0.068	1.397	-1.053	-1.248	-1.158	-1.297	-1.126	-0.146	-0.4	0.281	0.785	-0.019	-0.311	-0.868	-1.474	0.4	-0.596	-0.763	-0.078	0.49	-1.432	-0.7
class-specific genes	207103_at	KCND2	-1.291	0.014	0.076	-0.327	-0.338	-0.655	-0.524	-2.759	0.218	-0.36	-0.249	-0.272	-0.899	-0.005	-0.674	1.769	-0.463	-0.237	0.365	-0.928	0.15	-0.707	0.151	-2.083	0.018	0.315	0.647	-0.018	-1.734	-1.835	-2.708	-1.136	-2.795	-0.581	-0.081	0.738	0.04	0.612	-0.838	-0.511	0.403	0.047	0	0.255	-0.003	-0.105	-0.025
class-specific genes	206439_at	EPYC	-1.912	-1.207	-0.468	-0.616	0.059	-1.06	0.151	-1.395	-0.079	-0.834	0.263	-2.312	-1.778	1.119	0.124	-2.146	1.166	-1.13	-2.469	0.463	1.631	0.671	-0.64	-0.759	-0.742	0.732	-0.473	-0.327	-1.01	-1.935	-0.001	0.085	-1.369	-0.894	-0.803	-1.799	-1.098	0.621	-0.763	-0.145	-1.305	-0.429	-1.239	-1.446	-0.694	-0.935	-0.379
class-specific genes	236044_at	PPAPDC1A	-0.371	-1.337	0.106	0.197	-0.594	-0.129	0.092	-2.363	0.851	-1.417	0.278	-1.27	-1.677	0.487	0.115	-1.405	-0.097	-1.341	-0.364	0.302	0.039	1.015	0.872	-1.311	0.218	0.637	0.474	0.497	0.636	-0.408	-1.923	2.657	-0.043	0.874	-0.776	-0.192	0.307	-0.003	0.454	0.184	-0.018	1.186	0.008	1.15	-2.069	-1.176	-0.891
class-specific genes	217428_s_at	COL10A1	-0.805	-3.1	-0.569	0.246	-1.283	-0.28	0.438	-1.736	0.094	-1.463	0.404	-1.087	-1.568	0.814	0.19	-1.536	0.575	-0.923	-0.257	0.66	-0.557	-0.231	-2.708	-1.065	0.08	0.622	0.062	-0.921	0.101	-0.436	-0.719	-0.236	-0.422	-0.657	-2.462	-1.014	0.211	-0.999	-1.289	-0.66	0.069	0.17	1.105	0.452	-0.55	-1.132	0.061
class-specific genes	204945_at	PTPRN	-0.82	-0.16	-0.982	-0.482	1.927	0.955	-1.912	0.464	0.965	0.033	0.05	-1.171	-0.586	-2.926	-1.223	0.521	-1.143	-0.313	-1.933	-1.611	0.107	0.026	1.974	0.024	0.199	2.054	1.607	0.01	0.428	-0.429	-2.538	0.313	0.857	0.13	-0.623	0.008	-0.457	1.073	-0.007	-0.393	-0.176	0.683	0.855	-3.229	1.278	0.223	1.457
class-specific genes	213790_at	ADAM12	-1.461	-1.345	-0.582	-0.414	-0.671	-0.956	-0.543	-2.475	0.663	-0.593	-0.015	-3.203	-1.83	-0.305	-0.789	-0.21	-1.898	-2.688	-1.466	-0.786	-2.174	-0.847	0.243	-2.703	-0.245	-0.463	-0.315	-0.467	-0.953	-1.27	-0.606	0.294	-0.823	-0.11	0	-0.335	-0.987	0.156	-1.077	-2.602	0.168	-0.25	-0.725	-0.162	0.235	-2.275	0.97
class-specific genes	37892_at	COL11A1	-0.373	-1.348	-0.597	-0.114	-0.204	-0.489	-0.171	-1.708	0.609	-1.404	0.9	-1.191	-1.446	0.992	0.014	-1.551	0.181	-1.257	-0.478	0.553	-0.205	0.012	-0.107	0.416	-1.269	0.458	-0.034	-0.286	0.164	-2.016	-0.613	0.004	-1.207	-0.696	-0.826	-2.013	0.219	0.137	-2.126	0.542	0.462	-0.989	-0.818	-0.179	0.335	0.101	-1.205
class-specific genes	205523_at	HAPLN1	0.423	0.803	-0.233	-2.19	0.34	0.475	0.429	0.051	1.209	-0.579	-0.296	0.888	0.318	-0.462	0.806	-0.418	0.452	-3.009	-0.961	-0.076	0.108	-0.865	-0.24	0.835	0.944	1.097	1.186	-0.898	-0.029	0.128	-0.63	-0.064	-1.551	-0.144	0.292	-0.317	-1.986	-1.986	1.125	-0.786	-0.551	0.719	-0.187	0.304	0.456	-0.386	0.945
class-specific genes	214701_s_at	FN1	-0.938	-1.555	-0.076	0.853	0.035	-0.316	-0.739	-0.924	-1.479	-1.147	-1.058	-2.633	-1.313	-1.886	-0.461	-0.642	-1.259	-1.864	-1.138	1.257	1.233	-0.066	2.194	0.524	-0.787	-0.411	-1.77	0.316	-2.039	-0.757	0.252	-0.307	-0.088	0.302	-1.15	-0.528	-1.249	0.061	-0.02	-2.679	-0.864	-0.585	-0.758	-0.758	0.089	-0.612	0.357
class-specific genes	213479_at	NPTX2	-0.568	-1.817	-0.659	0.483	-1.524	0.311	-0.168	-1.869	0.495	-0.419	-0.041	0.531	-0.26	1.939	-0.444	-1.768	0.246	-0.925	-0.198	-1.989	0.144	-1.161	1.119	1.231	0.87	0.084	1.25	-1.456	1.79	-0.416	0.352	-1.141	0.564	-0.078	0.933	1.798	0.651	1.099	0.186	-0.169	-0.315	0.392	-0.356	0.374	0.629	-0.636	-0.28
class-specific genes	1554950_at	ACAN	-0.643	-0.536	0.802	-0.059	1.132	-2.608	0.482	-1.473	-1.778	-2.298	0.445	-0.664	-1.139	-2.988	-1.789	-2.546	-3.31	-1.09	-1.185	-0.058	-1.286	0.839	-1.812	0.173	-1.102	0.705	0.631	-1.481	0.06	-2.672	-0.782	1.134	-1.377	-0.95	-0.109	0.465	-1.501	-1.094	-1.442	-1.506	0.933	-0.914	-0.258	-2.632	-1.81	0.237	0.446
class-specific genes	239572_at	GJA3	-0.412	0.053	-0.833	-0.558	0.355	0.912	-0.646	-1.13	-0.314	-0.547	-0.442	-0.876	-1.696	0.219	-1.405	-0.937	-3.468	-0.65	-1.674	-5.104	-1.506	-0.398	-0.475	0.785	0.389	0.959	0.144	-0.753	-0.732	-2.533	1.152	-0.803	0.695	-0.282	0.064	-0.602	-0.174	0.664	-0.004	-0.899	3.411	0.351	-1.063	-0.899	-4.212	0.606	1.011
class-specific genes	204914_s_at	SOX11	-0.973	-2.217	-0.481	0.428	-1.367	-2.494	-0.558	-1.935	0.579	-1.066	0.548	-1.46	-0.997	0.209	-0.584	-0.209	-0.914	-2.871	-0.621	1.003	-0.698	-0.789	0.062	0.043	-0.406	0.016	0.279	-0.709	0.819	-0.153	-1.464	-0.004	-0.464	0.035	0.46	-0.211	-0.653	-0.086	-1.266	-1.713	0.241	-1.297	0.265	0.175	-1.081	-1.18	0.502
class-specific genes	235417_at	SPOCD1	-0.817	-1.062	-0.341	-0.919	2.026	-0.035	-0.735	-0.211	1.963	-0.696	0.37	-0.501	-0.86	1.68	1.554	-0.144	-0.561	0.257	-0.817	1.356	-1.015	-0.85	-0.173	0.043	1.624	0.888	0.45	1.124	-0.385	-1.019	-1.474	-0.433	0.061	-0.67	-0.742	-0.245	-0.706	2.213	1.695	-1.264	-0.294	-0.503	0.554	-0.198	1.517	1.182	-0.019
class-specific genes	232446_at	MGC45800	-2.022	0.388	0.113	-0.298	1.004	0.054	1.043	-1.203	-0.469	0.02	-0.928	-1.987	-0.275	-1.905	-0.188	-0.166	-0.163	-1.999	-0.853	-2.199	-3.011	0.516	0.567	1.043	-1.367	-1.062	0.26	0.62	0.072	-1.296	0.747	0.405	0.726	-0.149	-0.083	-1.683	0.242	-0.912	0.802	-2.244	0.451	0.152	0.535	-0.755	0.05	0.457	-0.667
class-specific genes	236517_at	MEGF10	-0.096	-1.045	-0.649	0.005	1.653	0.393	-0.013	-0.725	-0.11	0.261	-0.088	-1.453	-2.192	-1.279	-2.267	-0.098	-0.564	-1.277	-0.908	-1.566	-0.113	-0.767	-2.336	0.209	-0.167	0.399	0.483	-1.936	0.406	-0.86	-0.909	0.543	0.113	-0.367	0.046	0.458	0.102	0.388	-0.344	-2.172	-0.208	0.584	-0.748	-3.155	-0.152	-2.823	-0.419
class-specific genes	207031_at	NKX3-2	-0.602	-1.153	-0.574	-0.336	-0.47	-0.319	0.274	-0.184	0.006	-0.988	0.151	-1.615	-1.847	0.619	-0.708	-0.438	-0.891	-0.757	-2.85	-1.609	-0.69	-0.191	-0.159	-0.559	-0.595	1.074	-0.044	-1.818	-2.583	-1.02	-1.003	-0.633	0.466	-2.206	-0.272	-0.556	0.549	-0.412	-1.246	-1.354	0.807	-0.024	0.185	0.465	0.24	-0.682	0.476
class-specific genes	206924_at	IL11	-1.893	-1.663	0.28	0.896	-0.311	-0.598	-0.064	-0.669	0.153	-0.689	-0.019	-0.085	-0.322	0.336	0.064	-2.171	-1.552	0.091	-1.586	0.551	0.814	0.864	0.887	0.994	-1.485	-0.247	0.765	-1.496	0.354	-2.312	-1.088	0.109	-1.862	-1.107	0.463	0.446	-0.276	0.922	-0.813	-1.465	0.441	0.252	-1.258	-1.796	0.04	0.592	-0.506
class-specific genes	211470_s_at	SULT1C2	-1.435	0.577	-0.249	-0.257	1.539	-1.097	0.831	-0.066	0.398	-0.4	1.663	0.36	1.346	0.851	0.441	-0.866	-0.378	-0.381	-0.344	-0.398	-0.616	1.039	0.545	0.543	-0.505	0.209	0.206	0.897	-0.797	0.033	1.82	0.281	2.259	-0.969	-0.867	0.137	-1.148	0.07	-1.185	1.259	-0.23	1.086	-0.155	0.046	1.043	0.46	-0.728
class-specific genes	205073_at	CYP2J2	0.115	-0.429	1.15	0.651	-0.39	0.461	0.744	1.13	1.604	0.989	0.129	1.022	0.816	0.41	0.21	0.599	0.708	-0.61	-0.552	-3.601	1.408	-1.349	-0.418	0.716	0.735	-0.401	0.25	-1.476	0.641	1.247	1.325	0.165	0.636	-1.219	-3.067	-2.123	-0.403	0.487	0.337	0.921	-2.132	0.339	-1.836	-0.034	-0.394	0.364	-0.821
class-specific genes	205632_s_at	PIP5K1B	0.034	0.521	-0.151	-0.378	-0.893	-0.09	0.279	0.015	-0.212	0.821	0.036	0.369	0.28	0.315	0.777	1.031	-3.01	-0.7	-0.287	-0.422	1.683	-0.143	-0.099	-0.399	-0.616	-0.153	0.278	0.277	0.535	-0.358	2.156	-1.322	1.479	-0.28	-1.722	-1.084	-0.391	-0.347	-0.178	-0.961	0.136	-0.556	-1.157	1.276	-0.053	0.103	0.136
class-specific genes	229358_at	IHH	0.892	0.482	0.842	1.484	-0.841	0.361	0.526	1.26	-0.213	0.079	0.225	0.507	1.14	0.954	0.922	0.158	0.069	-0.272	-1.273	0.447	-1.397	-1.502	1.076	1.106	-0.631	0.805	0.27	1.083	-0.146	0.86	1.598	0.021	1.241	-0.178	-1.024	-1.021	0.698	-0.831	-0.318	-0.759	0.088	-0.309	-1.159	0.622	1.454	1.42	0.211
class-specific genes	xxx	NA	NA	NA	NA	NA	NA	NA	NA	NA	NA	NA	NA	NA	NA	NA	NA	NA	NA	NA	NA	NA	NA	NA	NA	NA	NA	NA	NA	NA	NA	NA	NA	NA	NA	NA	NA	NA	NA	NA	NA	NA	NA	NA	NA	NA	NA	NA	NA
class-specific genes	205313_at	HNF1B	0.49	-1	0.207	0.348	0.784	0.475	-0.232	0.255	0.499	-0.354	-0.708	0.107	0.463	-0.543	0.308	0.159	0.203	-1.299	0.205	-0.386	0.106	1.016	0.102	0.387	-0.119	0.432	0.322	0.655	1.039	0.468	0.621	-0.155	0.991	0.013	1.442	-0.382	-0.904	0.468	-1.003	1.257	-0.395	-0.551	0.328	0.348	0.187	0.14	0.216
class-specific genes	205765_at	CYP3A5	0.127	-0.253	0.775	0.316	-0.073	0.707	0.487	-0.633	0.607	-0.879	-0.165	0.626	0.643	0.274	0.317	0.774	-1.64	-0.182	-1.161	-2.147	0.682	-0.944	0.166	0.543	0.475	0.003	-0.676	0.461	0.578	0.939	2.171	-0.129	2.333	-0.034	1.835	1.146	-0.802	-0.179	-0.084	-0.268	0.538	-0.154	2.2	-2.075	0.661	2.191	0.888
class-specific genes	1560457_x_at	LSDP5	-1.283	0.387	-0.977	0.913	1.301	1.442	-1.335	-0.381	-0.31	0.263	1.182	-0.526	-1.374	0.88	-0.1	0.172	-1.457	-0.477	0.553	-1.098	-1.89	-2.059	-1.618	-0.798	0.717	1.44	0.258	-2.186	-0.219	-0.826	-1.977	-0.255	0.956	0.339	-0.425	-0.02	0.873	1.529	0.229	-1.741	0.537	1.027	0.224	0.087	-0.635	-1.12	0.762
class-specific genes	207022_s_at	LDHC	-0.148	1.333	0.265	-1.17	-0.159	0.923	-1.572	-0.578	-2.197	0.524	-0.089	-0.346	-0.352	-3.113	0.757	0.033	1.148	-0.928	0.455	-2.539	0.946	0.082	1.281	0.574	0.389	0.099	-0.035	0.768	1.107	0.413	0.811	0.145	0.536	1.317	-1.493	-0.435	-1.674	0.363	0.191	1.431	0.398	1.037	-1.74	-0.418	0.327	-1.699	0.579
class-specific genes	219298_at	ECHDC3	-0.798	-0.14	0.647	0.908	-0.16	-2.413	0.038	1.325	0.771	1.216	-0.781	-0.886	-0.749	-1.294	1.252	0.258	0.335	0.176	0.654	-0.689	1.228	-1.357	0.516	0.819	0.371	0.341	-0.867	-1.024	0.334	1.213	-0.284	-0.42	-1.637	1.985	1.364	0.5	0.091	-0.137	0.185	0.413	-2.052	0.058	-0.651	-0.81	-1.279	1.186	-0.908
class-specific genes	223597_at	ITLN1	0.562	0.49	1.201	-0.911	-0.272	1.426	1.044	0.151	1.023	1.597	-0.63	1.641	1.299	0.501	1.216	0.47	-0.861	-0.938	-0.234	-0.47	-0.972	0.13	-0.017	-1.51	0.759	0.653	-0.843	-0.015	-3.967	-1.281	2.513	-0.384	0.087	-1.18	-0.1	-0.448	0.666	-0.487	0.663	-1.13	-0.851	0.169	0.359	-0.813	-1.015	0.993	0.516
class-specific genes	234008_s_at	CES3	1.491	0.501	0.791	0.493	-1.642	1.085	1.097	0.025	0.378	-0.224	-0.134	0.471	0.817	0.443	0.441	-0.643	0.051	0.15	-0.195	-0.458	1.548	-0.543	0.294	0.601	1.028	0.504	-0.257	-0.368	1.071	0.222	-1.09	-0.457	0.077	1.729	0.11	0.73	-0.363	-0.039	-0.307	1.08	0.613	-1.051	0.527	0.108	0.452	0.159	0.157
class-specific genes	202992_at	C7	-0.432	-0.808	-0.997	0.399	-0.015	0.309	0.743	0.579	0.045	-0.247	-0.184	-0.682	-1.208	-0.366	-0.296	-0.405	-0.778	-0.471	0.486	-0.521	-1.718	0.423	1.031	0.679	-0.648	-0.286	-0.248	-1.848	0.286	-0.304	0.143	-2.035	0.88	-3.262	0.26	0.077	0.531	-0.19	-2.15	0.019	-0.598	-0.419	0.722	-1.115	0	-0.134	0.654
class-specific genes	206159_at	GDF10	-0.854	-1.802	0.068	0.041	1.272	-0.333	-0.125	-0.03	0.406	-1.48	0.754	-0.44	-2.098	-2.207	-0.646	0.805	-0.601	-0.784	-0.75	-1.572	-1.304	0.163	-0.596	-0.76	0.121	0.268	-0.459	-0.213	0.145	-1.074	-2.391	2.12	0.875	0.22	0.118	-0.551	-0.297	0.332	2.129	-1.446	-1.742	-0.11	-1.22	-1.699	0.179	-0.866	0.379
class-specific genes	235649_at	ADAMTS8	-1.214	-1.402	-1.949	0.836	-0.493	0.978	1.057	0.616	0.18	-0.991	-0.061	0.535	-0.179	0.185	0.181	1.288	2.744	-0.949	-1.253	-0.945	-1.383	1.065	-0.771	0.121	-0.501	-0.139	-0.277	-0.475	-1.197	-0.788	-1.063	-0.546	0.478	-0.786	-1.076	1.142	-1.104	0.55	0.621	-1.433	-0.999	0.047	-1.129	0	0.133	0.179	0.726
class-specific genes	235225_at	SCN2B	-0.656	-0.448	-0.763	-0.1	-2.373	-1.236	0.271	-0.326	0.361	-1.677	0.544	-0.758	-0.816	-2.67	-2.994	0.827	-2.054	-2.398	-0.217	-2.738	-0.95	-0.833	0.711	0.768	0.709	1.005	0.71	0.537	-1.173	-1.29	-0.224	0.385	-0.023	-0.379	-1.008	0.168	0.292	-2.586	0.399	-1.504	-1.047	0.677	0.617	-0.724	-1.601	-2.693	0.374
class-specific genes	202222_s_at	DES	-0.632	-0.464	-0.424	1.321	0.687	0.546	0.879	1.631	1.165	-0.372	-0.062	0.439	-0.425	-0.31	-0.429	-0.375	-0.296	-1.171	0.546	-0.263	-0.721	0.075	1.216	0.385	1.08	1.23	-0.319	-2.121	-0.316	-1.492	-0.992	0.014	-1.266	0.29	-0.465	1.169	0.269	0.282	-0.528	-0.958	0.466	-0.226	0.465	-0.23	0.274	-0.716	0.82
class-specific genes	213974_at	ADAMTSL3	-1.13	-0.647	-0.579	0.002	0.85	-0.438	0.468	-0.085	-1.298	-1.953	-0.934	-0.759	-1.873	-1.068	-1.815	0.358	-1.306	0.339	-1.164	-0.755	-2.965	-0.364	0.21	0.308	1.234	-0.595	0.747	-5.144	1.466	-0.209	-1.232	-1.215	-0.04	-1.307	0.245	0.35	-1.498	0.74	-0.648	-1.826	-0.513	-0.775	-0.056	0.733	0.509	-0.423	-0.797
class-specific genes	220276_at	RERGL	-1.506	-0.615	-0.318	-0.892	0.132	-0.841	-0.018	-0.338	-1.083	-0.305	-0.136	-0.493	-1.135	-0.1	-0.654	1.097	-1.46	0.324	0.345	-1.589	-1.382	-0.94	0.849	1.053	-1.541	0.793	0.659	-1.411	0.845	-0.232	-1.056	-0.629	0.237	0.175	0.537	-0.526	-0.848	0.483	-0.463	-1.47	1.558	0.616	0.289	-0.543	-0.611	0.32	0.805
class-specific genes	xxx	NA	NA	NA	NA	NA	NA	NA	NA	NA	NA	NA	NA	NA	NA	NA	NA	NA	NA	NA	NA	NA	NA	NA	NA	NA	NA	NA	NA	NA	NA	NA	NA	NA	NA	NA	NA	NA	NA	NA	NA	NA	NA	NA	NA	NA	NA	NA	NA
class-specific genes	217504_at	ABCA6	-0.396	-0.651	-0.658	-2.387	-0.956	-0.222	0.345	-0.266	-1.491	0.075	0.178	-0.677	-1.888	-2.138	-1.908	0.467	-2.339	-0.737	0.332	-0.652	-2.683	0.805	0.512	-0.223	0.722	0.177	0.595	-0.255	-1.798	-1.789	-1.027	-2.254	0.767	-1.866	0.261	-2.871	-0.666	-0.316	-0.552	-2.236	0.518	0.158	-0.731	-3.232	0.134	-0.17	0.556
class-specific genes	210155_at	MYOC	-2.006	-1.387	-1.479	-0.43	-2.662	-0.033	-0.16	-0.168	0.399	-0.274	-0.836	-2.196	-2.088	-0.351	-0.39	-0.101	-0.576	-1.472	-1.696	-0.569	-1.429	-1.111	-0.95	0.839	-1.701	0.66	0.641	-0.077	-0.012	-0.974	-1.767	-0.718	-1.632	0.272	-0.037	-1.042	-0.844	0.325	0.369	-0.64	0.464	0.259	-0.656	0.327	-0.427	-0.549	-0.251
class-specific genes	219791_s_at	NBLA00301	-1.911	-0.92	-0.316	0.592	0.832	0.41	-0.341	1.375	-0.375	-1.609	1.025	-0.93	-1.126	-0.784	0.65	1.066	-1.527	-1.31	-1.01	0.475	-1.584	-0.733	-0.696	1.262	0.489	0.69	-0.22	-0.415	-0.499	-1.351	-0.709	-1.03	-0.552	-0.68	-0.349	-0.987	1.025	1.968	0.698	-1.179	-0.425	-1.186	0.121	0.21	0.178	-0.173	0.649
class-specific genes	229839_at	SCARA5	-0.262	0.397	0.047	0.267	0.026	0.776	1.032	0.282	0.033	-0.244	-0.32	0.659	0.458	-0.173	0.637	0.303	-0.337	-1.14	0.508	-0.817	-1.924	-1.749	0.581	-0.996	0.352	0.312	-0.383	-1.423	-0.801	-0.354	1.049	-1.037	0.313	-1.21	-0.712	-1.279	-0.745	-1.442	-1.512	-1.917	-0.127	-0.902	-0.128	-1.139	-0.221	1.209	-0.099
class-specific genes	232267_at	GPR133	-1.634	-1.638	-1.925	0.415	0.13	-0.19	0.415	-0.566	-2.414	-1.85	-0.547	-0.049	-1.276	0.086	-1.707	-0.296	-0.711	-1.131	-0.403	-0.897	-3.089	-0.239	2.703	0.954	-0.56	-0.134	-0.556	-0.602	-1.734	0.574	0.022	1.217	-1.082	-1.51	-1.003	1.365	1.002	0.261	0.257	-1.537	-1.505	1.063	-0.882	-2.222	-0.433	-0.337	0.284
class-specific genes	223623_at	C2orf40	-1.163	-0.275	-1.452	0.61	-0.586	0.802	0.677	0.89	-0.03	-1.893	-0.141	-0.35	-2.666	-0.374	-1.127	0.642	-1.221	-0.887	-0.442	-0.649	-1.687	-0.754	0.96	-0.225	-1.783	-0.394	-0.849	-2.945	0.864	-0.201	-0.844	0.4	-0.841	1.883	-1.143	0.43	0.91	-0.922	-0.155	-1.122	-0.166	1.806	-0.87	0.442	-0.469	0.204	-0.503
class-specific genes	237177_at	CNTN4	-1.085	-0.118	0.219	-0.3	-0.463	-2.44	-3.562	-0.876	0.502	-0.553	0.556	-1.185	-1.126	-3.881	-2.266	-0.284	0.048	0.01	-1.775	-0.72	-0.6	0.907	-0.75	-0.015	-0.456	-1.134	-1.755	0.862	0.606	0.036	-1.112	-1.83	-1.424	-1.217	0.488	-1.769	-1.238	0.162	0.091	-0.768	-1.435	-0.068	-1.164	-0.572	-0.988	0.186	-1.178
class-specific genes	227242_s_at	EBF3	-1.341	-0.378	-1.13	-0.512	0.291	-0.531	-0.099	-0.608	0.939	0.272	0.888	-0.969	-3.928	-3.098	-1.552	0.005	-1.628	-1.636	-0.317	-1.802	-2.688	-3.545	-1.012	0.433	0.554	0.356	0.166	-1.554	0.606	-0.54	-1.304	-0.301	-0.134	-0.133	-0.665	0.09	0.714	-2.268	0.137	-0.205	0.112	0	-0.008	-1.108	-1.791	-0.623	0.029
class-specific genes	212670_at	ELN	-0.411	0.64	0.381	0.011	-0.994	0.058	-0.446	-0.036	-0.204	-1.814	-1.79	0.083	-0.24	1.247	-0.477	0.048	-0.653	-0.076	0.341	-0.859	-1.701	-1.032	-0.201	-0.549	-0.436	0.228	0.054	-1.386	1.101	-0.001	-0.722	0.934	0.905	-0.799	0.439	0.016	1.1	0.822	1.258	-1.643	0.452	1.65	0.111	0.491	-0.103	0.422	-0.549
class-specific genes	1562240_at	PLXNA4	-0.387	-1.305	-0.238	0.771	-0.662	0.377	-0.009	-0.583	-0.418	0.682	0.308	-2.266	-1.06	0.434	0.36	-0.219	0.139	-1.9	0.361	0.28	0.206	1.142	-0.594	0.685	1.024	1.632	-0.757	-0.144	-1.081	-1.984	-1.547	0.639	0.556	-1.138	-2.213	-0.485	0.045	-0.958	0.773	1.128	0.965	0.916	0.445	0.356	-1.398	-0.189	-0.168
class-specific genes	205357_s_at	AGTR1	-1.119	-0.838	0.114	-0.419	0.001	-0.311	0.094	0.415	0.696	-0.856	-0.637	-1.236	-2.02	-1.858	-1.154	0.15	1.514	2.103	-0.107	-1.308	-1.015	-0.769	-0.727	-1.039	-1.272	-0.383	-0.048	-1.594	1.375	1.683	-1.166	-0.679	0.064	-0.825	-0.051	-0.331	-0.083	0.451	-0.051	-1.816	0.088	0.178	-0.351	-1.181	0.176	-0.653	0.22
class-specific genes	212865_s_at	COL14A1	-1.188	-0.591	-1.143	-0.402	-0.337	-0.328	0.078	-0.243	-0.312	-0.594	-0.163	-0.434	-0.897	0.224	-0.15	-0.247	-0.991	-0.579	0.217	-0.932	-0.813	-0.789	0.594	0.768	0.069	-0.72	0.27	-1.638	0.174	-0.862	-0.896	-0.74	0.041	-1.065	-0.519	-0.507	0.733	-0.252	-0.932	0.68	-0.193	-1.122	-1.153	0.341	-0.224	-0.108	-0.061
class-specific genes	1552509_a_at	CD300LG	-1.193	-1.289	-1.234	0.422	0.406	0.567	0.263	-0.356	-0.114	-0.394	-1.159	-0.783	-1.971	-0.501	-1.05	1.412	-0.653	-0.156	0.72	-0.728	-2.182	-2.202	-0.623	-0.006	-0.202	0.509	-1.652	-0.834	-0.617	1.975	-0.491	-0.043	1.199	-0.283	-1.308	-0.012	0.543	0.48	-2.734	-1.056	0.212	-0.128	0.494	-0.672	0.658	-0.328	0.781
class-specific genes	219230_at	TMEM100	-0.57	-0.626	-0.924	0.13	0.001	0.058	0.478	-0.322	0.398	-1.013	-0.904	-0.395	-0.524	-0.76	-0.671	-0.498	-1.279	-1.023	-0.138	-1.81	-0.979	-1.521	-0.179	0.503	0.229	0.854	2.419	-1.2	0.002	-0.698	-0.455	-0.922	-1.108	-1.467	-1.088	-1.003	0.184	-0.109	-0.176	-1.266	-1.04	1.089	-0.592	-1.858	0.059	0.925	0.31
class-specific genes	1558708_at	NRXN1	-1.357	-1.16	2.255	-0.952	1.151	0.428	-0.365	1.696	-0.521	0.221	-0.414	-0.643	-0.823	-1.286	-1.517	-1.675	-1.178	-1.178	-0.408	-0.664	-1.293	-0.732	1.814	-0.149	0.406	0.878	0.097	-0.334	-0.081	0.159	-1.167	-0.32	-0.037	0.07	0.103	-0.996	-0.456	0.816	-1.107	-1.458	-0.993	-0.761	-0.29	-1.504	0.697	-0.761	-0.618
class-specific genes	205653_at	CTSG	-1.296	-0.046	-0.415	-0.214	-0.87	0.061	0.2	-0.365	-0.996	0.06	-0.284	-1.969	-0.64	-0.421	0.39	0.159	-0.735	-0.123	0.07	-0.758	-0.728	-2.567	0.088	0.284	0.408	0.3	-0.068	0.158	0.146	0.148	-0.741	0.319	0.759	0.183	2.282	0.121	0.161	0.522	-0.768	-0.566	0.033	0.794	0.233	-0.923	0.427	-0.668	0.331
class-specific genes	207317_s_at	CASQ2	-1.367	-1.174	-1.714	0.203	0.561	-0.219	-0.18	1.689	-0.757	-0.671	0.51	-1.32	-1.334	-0.26	-0.944	0.777	-1.022	-1.292	0.343	-1.195	-0.716	-1.707	0.501	1.186	0.302	-0.989	0.415	-0.316	1.371	-0.256	-0.045	-0.896	0.706	-0.076	-0.343	1.466	2.723	0.989	1.224	-1.112	-0.552	-0.161	0.663	0.321	0.115	0.247	-0.173
class-specific genes	205696_s_at	GFRA1	-2.228	0.314	0.429	-0.215	2.02	-0.338	-0.319	-1.077	0.988	0.199	0.529	-0.535	-4.189	-1.04	-2.862	-0.015	-0.977	1.772	-0.816	0.027	-1.001	0.257	1.412	0.761	-0.598	0.397	0.41	-1.795	-0.266	-0.051	-0.672	-0.249	-0.28	-0.219	-0.113	0.262	-0.266	0.133	-0.55	-3.355	-0.148	-0.173	0.279	-0.446	-0.415	0.119	0.317
class-specific genes	1566722_a_at	SVEP1	-2.473	0.051	-0.936	-1.506	-0.341	0.733	0.479	0.138	0.306	-1.911	0.469	-0.423	0.205	-1.646	-2.697	-1.372	-2.15	-1.468	-2.488	-0.441	-1.494	0.464	-1.093	0.764	-1.101	0.999	0.672	0.258	0.185	-0.136	0.165	0.091	0.996	0.355	0.454	-0.035	-0.573	0.51	-1.748	-0.358	0.07	0.52	0.607	-0.079	-0.23	-1.148	0.048
class-specific genes	203296_s_at	ATP1A2	-1.032	-1.209	-1.696	0.296	0.836	0.3	0.796	1.395	0.056	-0.519	-0.208	0.008	-0.847	-0.538	-0.807	0.508	-0.767	-0.604	0.81	-0.847	-1.014	-0.251	0.033	1.236	0.249	0.254	-0.672	-0.699	0.388	-0.501	-0.338	0.86	0.131	0.072	-0.136	1.624	-1.537	-0.263	-0.269	-0.739	-1.788	0.004	-0.966	2.387	-0.122	-0.402	0.24
class-specific genes	210632_s_at	SGCA	-1.886	-1.035	-0.924	-0.631	-0.387	0.426	-0.107	1.581	0.811	0.558	2.27	0.723	-0.355	-0.515	0.068	2.049	-1.065	-0.796	1.467	-0.548	-1.25	-1.088	0.494	0.262	2.695	2.353	1.099	0.54	1.235	0.672	-0.696	-0.531	0.179	1.738	1.087	-0.133	0.881	1.395	2.214	-0.247	1.663	-0.382	0.258	-0.61	-0.191	-0.527	0.683
class-specific genes	220595_at	PDZRN4	-1.501	-0.781	-3.983	-0.165	0.309	-1.023	-0.19	1.487	0.208	-1.637	-0.842	-1.483	-1.227	-0.051	-1.961	0.801	-0.787	-0.83	-0.056	-0.483	-0.939	-0.113	0.716	0.572	0.096	-2.28	0.255	-1.563	0.458	-0.901	0.146	-0.507	0.484	-0.647	-1.669	-2.523	0.129	0.562	0.279	-0.811	-0.604	0.498	-2.424	-0.731	-2.41	-0.804	0.731
class-specific genes	209470_s_at	GPM6A	-1.035	-3.391	-0.379	0.469	1.138	-0.139	0.663	0.456	-0.277	-0.553	-0.524	-0.562	-0.955	-0.116	-2.956	1.197	1.947	-1.237	-0.565	-3.582	-0.972	-1.377	0.524	0.422	-0.668	-0.266	-0.531	-1.221	0.088	0.259	0.012	1.237	-0.434	-2.821	-0.805	0.332	0.208	-2.785	-0.193	-1.001	-2.909	0.309	-1.836	-3.42	-0.736	0.204	0.028
class-specific genes	205083_at	AOX1	-1.214	-1.876	-0.193	0.261	-0.155	-1.094	0.52	0.259	0.406	-1.138	-0.381	-1.386	-1.638	-0.576	-0.297	-0.939	-1.43	-1.032	0.31	0.019	-2.02	-0.889	0.832	1.257	0.821	1.08	0.258	-0.286	0.124	-0.384	-0.878	-0.778	0.495	-0.667	-0.607	-0.196	0.615	0.456	1.298	0.001	-0.514	-2.938	0.123	-2.64	1.047	0.862	0.085
class-specific genes	205612_at	MMRN1	-0.747	-0.618	0.011	0.088	-0.678	-0.017	0.883	0.648	-0.145	-2.288	-1.231	-0.506	-0.944	-1.949	-0.112	-0.301	-2.285	0.096	-0.174	-0.984	-2.062	-1.341	0.47	0.878	0.481	0.444	1.105	-0.125	0.049	-0.341	0.673	-0.512	-0.908	0.018	-0.414	-0.153	-0.416	-1.135	-0.099	-2.07	-0.978	-0.898	-0.136	-0.697	-0.042	-0.94	0.794
class-specific genes	239548_at	NEGR1	0.069	-1.37	-0.287	-1.615	-1.003	-0.013	-1.782	0.396	-0.174	-1.345	-0.409	-0.201	-0.083	-0.219	-1.966	0.448	-0.529	-0.01	-1.523	-0.22	-2.128	-2.633	-1.357	-2.059	-0.088	-1.122	-1.226	-0.983	0.299	-2.817	-0.913	-1.26	-1.076	-0.96	1.002	0.441	-1.314	-0.389	-0.997	-1.01	-0.308	0.172	0.672	-1.018	0.499	0.196	0.643
class-specific genes	227419_x_at	PLAC9	0.642	-1.881	-0.561	0.972	0.771	-0.807	-0.245	-0.318	-0.183	0.475	0.717	0.485	0.305	0.203	-0.648	0.155	-0.023	-0.585	0.324	-0.452	-0.976	-1.64	-1.245	-0.004	-1.42	-0.839	-1.971	-2.645	0.673	0.3	-1.118	-0.215	0.135	-1.19	-1.293	-0.736	-0.882	0.424	0.484	-1.764	0.514	1.096	-0.076	0.244	-0.801	-1.019	0.147
class-specific genes	223395_at	ABI3BP	-0.397	-1.207	-1.044	0.13	-0.458	0.027	0.674	-0.683	-0.607	-1.079	-0.836	-0.177	-0.509	-0.389	-0.425	-0.966	-1.626	1.382	0.421	-1.185	-1.788	-0.463	0.412	0.12	0.476	-0.417	-0.876	0.847	0.247	-0.711	-0.205	1.442	0.283	0.054	-1.328	-0.782	-0.693	-0.028	2.521	-0.375	-0.915	-0.879	0.117	-0.566	-0.834	0.585	-0.142
class-specific genes	204931_at	TCF21	-0.423	0.57	0.284	-0.492	-0.626	0.677	0.99	-0.662	0.302	-0.154	-1.142	0.431	-0.042	0.558	0.721	0.635	-0.528	0.414	-1.58	-0.919	-1.557	-0.203	0.717	0.831	-1.138	0.334	0.007	-0.663	0.119	-0.052	1.033	-1.249	1.239	-2.391	-0.57	-0.038	0.777	0.659	-1.718	0.214	-0.712	-0.938	0.716	-1.324	-0.584	1.085	-0.195
class-specific genes	238481_at	MGP	-1.005	-1.177	-0.985	-0.647	-1.548	-1.08	0.396	-0.275	-0.296	-2.415	0.526	-0.786	-1.727	-0.1	-0.103	0.054	-1.739	1.207	-0.597	0.12	-1.499	-1.447	0.112	0.185	-0.919	-0.636	0.199	-1.307	-0.466	-0.596	-0.343	-0.933	1	-1.28	-0.384	-0.572	-1.964	-0.407	-2.393	-0.712	0.184	-2.936	-0.148	-0.731	0.022	-2.419	0.358
class-specific genes	239270_at	PLCXD3	-1.122	-0.518	-0.518	0.289	-0.176	-1.167	0.274	-0.75	-0.787	-0.88	-0.744	-2.247	-1.921	0.604	-1.676	0	-1.501	-1.408	-1.253	0.862	-1.723	-0.613	0.171	-0.125	-1.109	-1.111	0.41	-1.33	-1.987	-1.712	0.545	-1.505	1.023	-1.303	-1.933	0.346	0.959	0.391	0.068	0.396	-0.557	0.007	-0.526	-1	-1.184	-0.942	1.137
class-specific genes	218730_s_at	OGN	-1.489	-1.685	-0.351	0.04	0.001	-0.251	0.302	0.072	-0.343	-2.49	-0.373	-0.539	-1.559	-1.104	-0.702	0.183	-1.591	-0.2	0.132	-1.109	-0.229	-0.182	0.846	0.313	-0.352	-0.817	0.229	-1.713	-1.227	-0.802	0.948	-0.778	1.07	-2.437	-0.719	-0.09	0.343	0.464	-1.913	0.161	0.439	-1.346	0.012	-0.767	0.288	-0.503	0.282
class-specific genes	226304_at	HSPB6	-2.706	-0.517	-1.084	0.695	0.275	-0.278	-0.813	0.514	0.624	-0.051	0.193	-0.479	-0.52	-0.363	-1.167	0.142	-0.846	-1.214	0.181	-1.786	-3.019	-1.648	0.643	-0.877	0.95	1.392	0.75	0.108	-0.316	-1.134	-0.593	0.879	0.622	-0.36	-1.006	0.022	0.475	0.332	-1.152	-0.521	0.527	0.553	-0.118	0	-1.673	-0.492	0.418
class-specific genes	239092_at	ITGA8	-0.176	-0.811	-0.1	-0.608	-0.382	-1.608	-0.788	-2.735	1.222	-0.072	0.47	-0.738	-0.422	-1.986	-0.877	-0.213	-0.573	-1.063	-0.707	-0.701	-0.967	-2.119	0.058	-1.947	0.472	0.949	0.674	-0.025	-0.137	-1.273	-0.579	-0.329	0.076	-0.117	0.208	-0.191	-0.786	-0.063	0.244	-1.56	-1.521	0.775	-0.315	-1.961	0.571	0.16	1.064
class-specific genes	226303_at	PGM5	-0.161	0.863	-1.096	0.728	0.323	0.144	0.416	1.525	0.16	-0.897	-0.367	0.018	-0.173	-0.456	-0.115	0.091	-0.606	-0.153	-0.073	-0.807	-2.471	-2.211	0.025	0.666	0.174	0.06	-0.858	-0.094	0.836	0.311	-0.453	-2.327	-0.189	-2.125	-0.348	-0.024	0.592	-0.004	-1.571	-0.215	-0.675	-0.266	0.282	0.881	-0.004	-0.247	0.456
class-specific genes	209897_s_at	SLIT2	-0.836	-1.918	-1.49	0.242	-0.346	-0.593	0.457	-0.015	-0.157	-1.752	0.718	-1.164	-2.407	0.127	-1.967	0.056	-1.264	-3.438	-1.069	-0.418	-0.994	0.164	0.166	-0.346	-0.88	-1.542	-0.854	0.345	-0.765	-0.702	-1.379	1.096	-0.297	-2.544	-0.145	-1.734	-0.534	0.638	-0.22	-0.49	-0.91	-0.119	-1.039	0.616	-0.864	-2.272	0.142
class-specific genes	233408_at	PREX2	-2.047	-0.09	-0.116	0.717	0	0.184	-0.282	-0.851	-0.658	-0.8	-0.421	-1.54	1.308	-1.127	-1.444	0.541	-1.634	-1.202	1.015	-1.801	-1.001	-0.469	1.14	0.872	1.791	0.514	-1.252	-1.033	0.279	0.749	-1.68	0.689	-0.932	-0.868	0.608	1.052	-0.771	0.068	-0.554	-1.91	1.306	0.184	-0.89	0.95	-1.64	-1.379	-0.874
class-specific genes	207175_at	ADIPOQ	-0.282	-0.242	-0.664	0.49	0.744	-0.308	0.577	0.776	-0.602	-0.942	-0.314	-0.62	-1.323	0.68	-0.635	0.948	-0.036	-0.327	0.676	-0.341	-1.358	-0.109	0.477	-0.285	-1.794	-1.032	-0.082	-0.721	-0.204	-0.927	-0.4	0.08	0.108	-0.09	-0.554	-0.79	0.298	0.524	0.587	-1.229	0.15	0.469	0.215	-0.043	-0.177	-3.126	-0.871
class-specific genes	230418_s_at	GALNTL1	-0.184	-0.771	-2.037	0.334	-1.538	-0.103	0.246	0.363	0.371	0.295	-1.936	-1.936	-2.274	-0.148	-0.296	0.207	0.326	0.841	0.168	0.18	-4.314	1.035	0.129	0.283	-0.06	0.372	-1.994	0.937	0.107	-1	0.068	-1.051	1.094	-0.809	0.234	-0.462	-0.854	0.228	-0.642	-1.508	-0.343	-0.78	-2.1	1.766	0.79	-2.249	0.275
class-specific genes	203951_at	CNN1	-0.634	-0.641	-0.382	1.044	-0.116	0.501	0.442	1.467	0.809	-1.007	-0.462	-0.222	-0.817	0.045	-0.485	0.248	-0.692	-1.3	-0.341	-0.087	-1.76	-0.793	1.083	0.823	-0.596	-0.247	-0.268	-2.454	-0.153	-0.627	-0.446	-0.173	-0.039	-1.294	-1.88	0.057	-0.443	-0.985	-0.679	-0.753	-0.692	0.007	0.517	-0.442	0.257	-1.666	0.724
class-specific genes	205721_at	GFRA2	-0.279	-1.123	-1.415	-1.154	-0.62	-1.469	-0.637	0.02	0.012	0.166	-0.791	0.523	-0.587	-1.768	0.043	-0.675	-0.859	-1.883	0.288	-1.575	-1.8	-0.943	-2.382	0.294	-0.16	0.922	-1.847	-1.714	-2.144	-0.233	0.093	1.462	-0.907	0.13	-0.657	0.623	-0.984	1.547	-0.657	-1.859	1.492	-0.622	-0.422	-0.051	0.95	-1.433	0.662
class-specific genes	241450_at	RSPO1	-0.467	-0.579	-0.579	0.031	0.672	-0.844	1.75	-0.597	-0.435	-0.954	-0.57	-0.467	-1.02	-1.02	-0.625	-0.654	-1.425	-1.338	-0.794	-1.584	-0.381	-1.073	-0.93	0.388	0.03	0.035	-0.462	-0.796	-0.751	-1.108	-1.033	1.827	-0.872	-0.167	-1.065	1.299	1.642	1.532	1.696	-1.283	-0.101	0.982	0.552	0.275	-0.611	-1.359	0.657
class-specific genes	232570_s_at	ADAM33	-0.158	-0.579	-1.29	0.413	-1.38	0.712	1.238	0.562	-0.575	-0.554	0.646	1.35	-0.797	0.472	-0.169	1.182	-1.703	-0.287	0.302	-1.771	-2.077	-0.833	-0.528	0.097	0.009	0.445	-0.124	-0.402	0.535	-1.135	-0.913	1.415	-1.114	-0.648	-1.559	-0.252	-0.133	0.297	0.02	-1.086	0.043	-1.048	-0.781	0.239	0.347	-1.065	-0.871
class-specific genes	209821_at	IL33	1.391	0.23	-0.154	-0.396	-0.94	0.451	0.058	-1.097	0.409	0.683	0.842	1.191	1.482	0.3	-0.34	0.008	-2.913	-0.428	-0.49	-0.679	-1.71	-0.357	-0.026	-0.102	-2.305	-0.327	0.48	-0.199	0.84	-0.557	2.646	-3.619	-0.121	-0.301	-0.818	0.325	-0.274	-0.15	0.029	-0.569	-1.121	-0.906	0.338	-1.08	0	-0.454	0.694
class-specific genes	205883_at	ZBTB16	-1.519	0.698	-0.843	1.559	1.441	0.339	-0.389	1.354	0.507	-0.676	-0.068	-0.365	-0.876	-0.571	-1.51	0.27	-0.814	-1.293	0.451	-0.344	-1.329	-0.248	0.26	0.266	-0.524	1.209	1.65	-1.379	0.238	-1.482	-0.001	-1.186	0.773	-0.229	-2.136	0.324	0.14	0.901	-1.232	-0.971	-0.392	0.128	-0.77	-0.183	0.374	0.258	0.651
class-specific genes	205923_at	RELN	-1.129	-0.746	-3.311	-0.262	-0.216	-3.079	0.015	-0.35	1.028	-0.984	0.553	-1.761	-1.223	-1.15	-0.867	-0.413	-1.472	-1.446	-0.612	-0.988	-3.678	3.056	-0.603	-0.589	0.627	0.732	0.575	1.648	-0.018	-1.982	-1.085	-0.738	0.226	-0.422	-0.902	2.158	-0.041	1.222	1.562	-1.342	-0.287	0.764	0.117	0.255	-0.066	-0.72	-0.219
class-specific genes	209613_s_at	ADH1B	-0.481	-0.819	-0.148	0.143	-0.638	0.461	0.68	0.566	0.075	-0.604	-0.98	0.463	-0.319	0.066	-0.083	0.783	-0.333	-0.13	0.69	-0.646	-1.533	0.014	1.106	0.281	-2.377	0.353	-0.734	-0.611	0.362	-0.532	0.284	-0.146	0.595	-1.406	-2.131	-0.01	0.085	0.512	0.113	-0.214	-0.51	0.122	0.85	-0.213	0.194	-0.25	0.729
class-specific genes	205911_at	PTH1R	-1.304	-0.409	-0.522	-0.909	0.316	-0.818	0.241	-1.146	0.758	-0.169	0.152	-1.948	-0.303	-3.193	-0.915	-0.008	-1.28	-1.029	-1.119	-1.172	-0.859	0.064	0.404	1.049	0.335	0.243	0.166	1.103	-0.115	0.978	-1.606	-1.131	0.786	-0.542	-1.93	0.019	0.172	1.12	0.871	-1.24	0.906	-0.729	0.595	-0.689	0.447	-0.948	0.294
class-specific genes	206227_at	CILP	-0.854	-0.842	-0.642	0.286	0.172	-0.406	0.528	-0.066	-0.579	-1.365	1.155	-1.582	-1.598	-0.853	-1.352	0.248	-0.649	-1.173	0.314	-0.487	-0.68	-0.106	-0.733	0.982	0.119	0.635	0.173	-1.114	-0.164	-1.402	-0.311	-1.083	-0.001	-1.399	-1.164	-0.787	-0.884	0.481	-1.214	0.665	-0.059	1.666	-0.328	-1.036	-0.169	-1.176	0.132
class-specific genes	205752_s_at	GSTM5	-0.809	-0.912	0.029	-1.221	0.402	-0.63	-0.433	-0.805	0.747	-1.512	-0.122	-2.292	-0.72	-1.732	-1.257	0.187	-1.564	-0.978	-1.348	-1.501	-0.828	0.072	-0.468	0.581	-0.195	0.544	-0.041	-1.534	-0.758	-3.113	-0.272	-0.508	0.374	0.183	-0.401	-0.064	-0.264	0.146	-0.15	-1.197	-0.723	0.51	-0.834	-2.236	0.339	-0.654	0.627
class-specific genes	210330_at	SGCD	-2.81	0.081	0.056	-2.035	-2.664	-0.765	0.02	-0.563	2.105	-0.69	0.557	-0.627	-0.616	-0.451	-0.783	-0.794	-0.5	-1.654	-2.393	-0.358	-1.013	1.061	-1.213	0.572	0.652	1.056	-1.401	-2.457	-1.62	-2.745	-2.161	-2.552	-1.471	-0.192	0.143	-0.452	-1.721	1.23	-0.517	-1.121	-2.443	-1.306	0.566	0.527	0.702	-0.188	-0.999
class-specific genes	201497_x_at	MYH11	-0.414	-0.569	-0.394	0.926	-0.119	0.617	0.863	1.477	0.791	-0.806	-0.63	0.363	-0.357	0.236	-0.187	0.387	-0.414	-0.47	0.181	-0.123	-1.713	-1.56	0.853	0.995	-0.829	0.365	0.095	-1.203	0.472	-0.529	0.143	-0.892	0.569	-1.297	-0.355	0.008	0.17	0.337	-1.585	-0.678	0.6	-0.395	0.446	-0.248	-0.155	-1.246	0.81
class-specific genes	228312_at	PI16	-1.234	-2.144	0.325	0.212	0.319	0.168	-0.743	-0.611	0.456	0.101	-0.52	-0.794	0.153	-0.989	-0.316	0.644	-0.055	-1.596	-0.017	-0.475	-0.913	-0.523	0.14	-2.236	-0.192	0.989	0.418	1.077	0.175	-1.092	-0.447	-0.962	0.702	0.748	-0.056	0.413	0.769	-4.083	0.654	-1.156	0.754	1	0.819	0.344	0.185	0.929	0.806
class-specific genes	230908_at	TACR1	-0.895	-0.885	0.192	0.645	-0.692	-0.33	0.949	-1.551	-0.23	0.651	-0.151	-2.037	0.452	-1.569	-0.455	0.856	-0.312	-1.539	0.249	-0.553	-1.111	-0.34	-0.239	0.582	0.349	-0.819	-0.291	1.055	-0.531	-0.022	-1.124	-1.486	-1.035	0.307	-0.592	0.756	1.571	0.352	1.635	-0.58	-0.571	0.809	0.075	-1.267	-1.624	-0.981	0.404
class-specific genes	225894_at	SYNPO2	-0.13	0.045	-0.424	0.744	-1.068	0.355	0.334	1.805	-0.243	-0.511	-0.164	-0.126	-2.202	-1.038	-1.053	0.379	-0.842	-0.817	-0.382	0.176	-3.303	-0.466	0.168	-1.241	-0.051	-1.641	-0.191	-1.757	0.535	-0.862	-2.169	0.224	-1.141	-1.742	-0.275	0.164	-1.577	-0.953	0.211	0.538	0.405	-1.924	-0.265	-0.071	-0.006	-2.196	0.714
class-specific genes	205475_at	SCRG1	-0.941	-1.903	-0.145	0.502	-0.154	-0.233	-2.624	1.1	0.648	-1.048	-0.295	-0.394	-1.778	-1.58	-2.169	0.115	-0.512	-1.921	-0.036	-0.224	-0.332	0.186	0.81	-1.265	-1.179	0.398	0.459	-0.102	-1.527	-2.965	-0.367	0.39	0.174	0.084	-0.039	-0.33	0.746	0.815	-1.061	-0.77	-1.4	-0.139	-0.651	0.091	0.001	0.231	0.157
class-specific genes	228885_at	MAMDC2	-0.971	-0.716	-0.798	-0.634	0.483	0.247	-0.154	0.371	0.298	-0.278	-2.669	0.338	-0.915	-0.83	-0.677	0.38	-1.887	-0.761	0.258	-0.688	-0.91	0.042	-1.207	0.2	-1.777	1.161	-0.464	0.716	0.264	-0.741	-0.292	-1.032	-0.175	-0.674	0.131	-0.617	-0.238	-0.207	-0.357	-1.819	-0.159	0.048	-0.178	-0.409	-0.002	0.267	0.114
class-specific genes	232313_at	TMEM132C	-0.733	-0.61	0.238	2.307	0.852	-0.134	-1.222	-1.095	0.786	0.925	-0.456	2.304	-0.667	0.124	1.432	1.144	-1.048	-1.135	1.022	-0.903	-1.689	0.344	-0.225	-0.235	0.462	1.967	0.021	-0.45	-0.109	-1.591	-1.994	-0.422	-0.505	0.797	-1.095	0.721	0.802	0.781	-1.117	-1.092	0.116	0.531	-1.169	-0.406	-1.089	-0.89	-0.478
class-specific genes	1565242_at	TNXB	-1.1	-0.385	1.691	-1.257	1.644	-0.137	0.223	-0.668	-0.137	0.02	0.62	0.327	-1.315	0.868	-0.026	-0.314	-1.293	0.465	0.849	-0.898	-0.119	0.418	0.745	1.806	-0.395	1.466	1.04	-0.833	1.21	-2.114	-0.044	1.043	-0.165	-0.108	-0.313	0.808	1.729	0.253	2.022	-0.446	0	1.71	0.453	0.613	0.528	-0.616	1.106
class-specific genes	209074_s_at	FAM107A	-0.528	-0.023	-0.5	0.186	0.679	-0.163	0.42	0.364	0.916	-0.57	-0.685	-0.021	-0.051	-0.182	-0.405	-0.11	-1.205	-1.078	-0.127	-1.213	-1.437	-1.052	-0.774	0.309	-0.673	0.564	0.399	-0.681	0.295	0.456	-0.908	1.511	-0.707	2.737	-0.928	0.841	1.589	0.344	0.797	0.811	-0.811	1.519	0.656	0.732	-0.758	-1.973	0.088
class-specific genes	209542_x_at	IGF1	-0.803	-0.725	-0.654	0.062	-0.009	-0.382	0.204	0.002	-1.094	-1.621	-0.02	-0.45	-0.23	0.019	-1.817	0.577	-1.553	-0.356	-0.489	-0.286	-0.397	-0.372	-0.564	-0.095	-2.896	-0.521	-0.012	-1.665	-1.602	-0.333	-0.757	0.483	0.043	-0.964	-1.437	-0.899	0.036	-0.168	-0.641	0.173	-0.151	-0.906	-0.12	0.274	1.206	0.016	0.34
class-specific genes	228554_at	PGR	-0.666	-0.102	-1.564	-0.06	-2.292	-1.495	0.132	0.71	-1.287	-1.065	-1.616	-0.494	-0.619	0.81	-0.524	-0.019	1.724	0.806	-0.527	-0.629	-1.298	-0.275	-1.68	-0.011	-0.037	0.44	-1.003	-1.331	0.37	-0.809	-0.158	-0.281	0.557	0.926	-0.776	-0.255	0.082	0.858	-1.514	1.73	-0.121	-1.529	-1.079	0.155	0.464	0.6	0.465
class-specific genes	207876_s_at	FLNC	-0.905	-0.187	-0.35	0.373	-0.001	-0.001	-0.173	1.345	0.861	-2.037	-0.676	0.154	-1.144	0.017	-0.537	-0.901	-2.808	-2.092	-0.042	0.053	-1.58	1.875	0.752	-0.039	0.412	-0.004	-0.498	1.891	-0.272	-2.805	-0.334	-0.79	0.892	-0.866	1.011	0.034	0.049	-0.418	0.267	-0.586	-0.757	0	0.227	-0.299	-0.036	-0.503	0.299
class-specific genes	205858_at	NGFR	-0.879	-0.627	-1.1	-0.432	1.477	0.198	0.521	0.488	-0.129	0.433	0.464	-1.142	-0.77	-0.339	-1.142	1.34	-0.635	-1.273	1.244	0.383	-1.808	-1.546	-0.762	0.257	0.66	-0.352	-0.428	-0.85	0.823	1.83	1.137	-0.985	1.126	-0.344	-1.436	0.124	0.732	0.139	0.276	-0.321	-1.042	0.369	-0.066	-0.726	-0.314	0.333	0.128
class-specific genes	219902_at	BHMT2	-0.973	-0.929	-2.692	-0.541	0.288	-1.068	0.564	-0.16	0.781	0.068	-0.122	-0.594	-0.65	-0.594	-1.29	0.364	-1.493	-1.27	-0.285	-0.437	-1.139	-0.696	0.612	0.714	0.641	0.612	1.053	-0.001	-0.452	0.535	-0.566	0.271	0.622	-0.623	-0.939	0.646	-0.547	0.723	-0.437	-3.095	-1.855	0.995	0.07	-0.286	-0.151	-0.034	0.504
class-specific genes	207864_at	SCN7A	-1.633	-0.076	-1.445	0.292	1.142	-1.138	1.296	-1.348	-1.318	0.483	-0.946	-3.191	-1.215	0.53	-1.69	-0.996	-1.79	-0.928	-0.921	-2.392	-1.682	-1.055	-1.107	1.064	1.293	2.011	1.094	-1.387	-0.228	-0.159	0.266	-1.145	-0.507	-1.816	-1.287	0.125	0.88	-1.145	-1.858	-1.65	-1.623	-0.076	-0.022	-1.301	0.279	-0.564	0.689
class-specific genes	205755_at	ITIH3	-0.624	0.07	0.277	-0.663	-1.58	0.451	0.533	-0.825	0.065	-0.123	-2.315	-1.323	-1.703	0.317	-1.19	-0.865	-0.195	-0.97	-0.177	-0.279	-1.499	-0.294	3.162	0.64	-1.161	0.47	-1.124	-0.469	0.137	-1.87	0.384	-0.65	-1.246	-0.316	0.361	-0.125	0.663	0.05	-2.001	-0.506	-0.962	-0.653	-0.856	-0.151	0.727	0.209	-2.844
class-specific genes	239183_at	ANGPTL1	-2.115	-1.764	-1.603	0.63	0.103	0.512	0.591	0.666	0.752	0.138	0.208	-0.889	-1.97	-1.587	-0.579	0.474	-2.183	-0.485	0.414	-1.898	-1.484	-1.369	0.727	1.463	0.065	-0.695	-1.469	-0.721	-0.966	-1.039	-0.85	-0.721	0.268	1.032	0.827	-0.255	0.087	-0.491	-0.641	-1.479	-1.483	-1.419	0.302	-1.895	0.646	-0.95	0.548
class-specific genes	230644_at	LRFN5	-1.146	-0.413	-1.108	0.193	0.076	-0.532	-0.452	-0.921	0.316	-0.313	0.407	-0.47	-1.511	-0.488	-0.621	0.528	-0.6	-2.909	-0.269	-1.879	-1.916	1.826	-0.876	0.382	-0.743	0.72	0.46	1.239	0.229	-0.902	-2.05	-2.122	0.37	-0.058	-0.261	-0.167	-0.101	-0.091	-0.04	-1.046	-0.599	0.56	0.835	-1.392	0.371	-0.128	-0.171
class-specific genes	206007_at	PRG4	-0.456	0.315	-2.53	-0.852	1.132	0.19	-0.075	-1.016	0.163	0.323	0.523	-2.409	-0.984	0.288	-0.653	-0.008	-0.004	-1.669	0.299	-0.606	-3.483	-0.646	-1.272	-0.297	0.282	-2.368	0.037	-0.735	-0.029	-0.832	-0.4	-0.227	-0.136	-1.761	-1.786	0.253	0.501	-0.333	-1.183	-0.046	0.176	0.307	-0.835	0.762	-1.459	-1.592	-0.085
class-specific genes	205907_s_at	OMD	-2.434	-1.098	-1.567	-0.001	-1.913	-0.623	-0.087	-0.87	-0.814	-0.554	0.368	-1.399	-0.811	-0.554	-1.128	-0.599	-0.823	-1.241	-0.375	-0.444	-0.782	-1.477	0.493	-0.223	-0.097	-0.016	-2.129	-1.536	0.313	-1.501	0.345	-0.139	0.044	-1.85	-0.193	-1.61	0.258	-0.262	0.433	-0.911	-0.026	-0.654	0.468	-1.97	-1.937	-2.369	0.299
class-specific genes	xxx	NA	NA	NA	NA	NA	NA	NA	NA	NA	NA	NA	NA	NA	NA	NA	NA	NA	NA	NA	NA	NA	NA	NA	NA	NA	NA	NA	NA	NA	NA	NA	NA	NA	NA	NA	NA	NA	NA	NA	NA	NA	NA	NA	NA	NA	NA	NA	NA
class-specific genes	219064_at	ITIH5	0.212	-0.314	0.546	-0.475	-0.605	-0.078	-0.061	0.243	-0.617	-0.653	-1.279	-0.359	0	-0.551	-0.634	0.853	-0.94	-0.262	0.118	-0.775	-1.699	-0.01	1.268	0.729	-0.761	-0.249	-0.217	-1.827	0.242	0.792	-0.753	-0.026	-0.401	-1.725	2.02	1.325	-0.289	-0.427	0.474	0.632	-0.762	1.689	0.139	0.299	-0.463	-0.54	-0.056
class-specific genes	215025_at	NTRK3	-2.69	-1.112	-1.184	0.139	0.458	0.896	-1.722	-0.131	0.939	-1.758	-0.328	-2.31	-2.358	0.057	-1.199	-0.4	-1.527	-0.662	-0.652	1.205	-2.128	0.349	0.161	1.696	0.107	1.179	0.578	-1.178	-0.064	-2.259	0.871	-0.261	0.224	-1.598	-1.941	-0.076	0.212	-0.104	-0.435	-2.122	-0.746	0.969	0.72	1.001	-1.408	-1.652	-0.907
class-specific genes	206423_at	ANGPTL7	-1.918	0.961	0.736	0.209	-0.068	-0.329	-0.139	-1.089	-0.541	0.908	-0.798	-0.714	-1.129	-1.327	-1.121	-0.268	0.361	-1.263	-1.535	-1.882	-1.423	-1.338	1.523	-0.875	0.309	1.88	-1.041	0.248	-1.298	-0.554	-1.174	1.081	0.249	-0.392	0.025	-0.256	-0.529	1.303	0.003	-1.404	-0.808	0.639	-0.254	0.708	0.323	1.435	0.732
class-specific genes	204719_at	ABCA8	-0.592	-1.464	-0.724	-0.264	-1.648	0.281	0.76	0.13	-0.729	-0.835	-0.613	0.533	-1.204	-0.665	0.256	0.492	-1.249	-0.779	0.487	-0.661	-1.723	1.388	0.078	-0.574	-1.486	-0.744	-0.953	0.646	0.076	-0.406	0.655	-1.589	1.09	-1.597	-0.082	-0.123	0.205	-0.515	-2.253	-1.089	-0.99	-0.384	0	0.097	0.592	-0.273	0.495
class-specific genes	220037_s_at	LYVE1	-0.542	-1.459	-0.188	0.445	0.186	-0.131	0.716	0.4	0.132	-0.557	-0.18	-0.545	-0.824	-2.738	-0.605	0.501	-0.297	-2.17	0.688	-0.826	-0.415	-0.679	-0.788	-0.377	0.085	-0.003	-0.324	-0.21	-0.047	-0.142	0.626	-0.797	1.077	-0.501	0.707	-0.012	-1.455	0.336	-1.832	-0.31	-1.049	0.202	-0.73	-0.711	-0.109	-0.376	0.377
class-specific genes	235335_at	ABCA9	-2.494	-0.567	0.24	-0.289	0.451	0.619	0.326	-0.345	-0.746	-0.176	-1.035	-2.715	-1.012	-2.197	-1.922	0.14	-0.481	-0.056	-0.184	-0.315	-0.747	-2.525	0.962	-2.002	-0.013	-0.538	-1.808	-1.913	0.076	-1.147	-0.21	-1.096	0.616	-2.845	-1.479	0.01	-0.403	1.065	0.573	-0.727	-1.853	-0.679	0.707	-1.485	0.332	-2.087	1.129
class-specific genes	216831_s_at	RUNX1T1	-1.362	-1.121	-0.421	-1.121	-0.53	0.087	1.135	0.158	0.28	-0.941	0.05	0.948	-0.923	-1.284	-1.037	0.465	-1.485	-1.168	-1.103	-1.638	-1	-1.077	-0.601	0.348	-0.145	0.976	0.747	0.416	-0.396	-0.406	-0.892	-1.094	0.576	-0.709	-0.636	-0.838	-0.445	0.272	0.371	-0.411	0.901	-0.916	0.011	-0.984	0.057	-0.853	-0.617
class-specific genes	237206_at	MYOCD	0.367	0.545	0.241	0.311	-0.293	0.655	0.977	0.843	-0.004	-0.56	-0.533	0.524	-0.252	0.264	-1.055	0.215	-1.233	-3.299	-0.471	-1.061	-0.208	-0.165	0.117	0.891	0.089	0.041	0.021	-1.441	-0.513	-1.498	0.479	-0.779	0.477	-0.84	0.226	0.562	1.302	0.312	-0.179	-0.146	-0.65	-0.598	0.38	-0.726	0.112	-0.281	0.332
class-specific genes	206201_s_at	MEOX2	-1.45	0.089	-2.347	-0.115	-2.569	0.285	0.25	0.145	-2.548	-0.609	0.506	-0.66	-2.548	-0.323	-0.669	0.684	-0.578	-0.184	0.437	-0.735	-0.882	-1.826	0.39	-0.256	0.036	-1.449	0.286	-2.472	0.53	-0.288	0.023	-0.192	-0.21	-2.15	-1.177	-1.045	-0.198	0.463	0.181	-1.442	-0.636	0.171	-0.922	0	-0.261	0.072	-0.397
class-specific genes	204938_s_at	PLN	-0.803	-1.08	-0.652	-0.088	-0.423	0.124	0.515	0.843	0.286	-1.258	-0.513	-0.655	-2.86	-0.44	-0.379	-0.469	-0.372	-1.168	-2.857	-1.32	-0.484	-1.052	0.22	0.717	-0.917	0.088	-0.192	-2.971	0.115	-0.764	-0.177	0.491	0.254	-1.334	-1.726	-0.074	-0.206	0.208	-0.462	-1.908	-0.86	-0.451	0.536	-0.967	-0.228	-1.148	0.656
class-specific genes	205384_at	FXYD1	-0.432	-0.284	-0.546	0.61	-1.418	0.441	0.328	0.602	-0.479	-1.92	-0.183	0.1	0.067	-1.874	-0.733	0.625	-1.365	-0.637	0.205	-0.064	-1.844	-1.875	1.209	0.707	0.901	-1.921	1.216	-2.039	0.078	1.602	-0.419	1.177	-0.81	0.458	-1.646	0.306	0.514	-1.305	0.215	-0.553	0.025	0.859	0.212	-1.857	-1.165	-1.248	0.415
class-specific genes	209242_at	PEG3	-1.332	-1.494	-0.279	-0.851	0.028	0.354	0.137	-0.283	0.445	-0.845	0.198	-1.503	-1.608	-0.103	-0.894	-0.012	-1.174	-0.781	-0.264	2.049	0.638	-0.709	-0.186	-0.782	-0.682	0.174	0.136	-0.679	0.738	-0.18	0.738	-0.975	0.856	-1.84	0.232	0.129	0.783	0.013	-3.978	-0.036	-0.582	-0.875	0.111	-0.995	0.205	-1.079	0.642
class-specific genes	205792_at	WISP2	-1.214	0.462	-0.869	0.549	-0.187	-1.222	0.696	0.302	1.096	0.658	-1.155	-0.879	-1.413	-0.126	-0.058	-0.329	0.136	-1.227	0.329	0.567	0.521	0.233	1.152	1.158	0.222	-0.403	1.369	-1.06	-0.62	-1.375	0.31	-0.399	-0.731	-0.27	1.45	0.998	0.969	-0.334	0.051	-2.031	-0.035	1.357	0.691	-0.008	-0.721	0.774	-0.518
class-specific genes	210375_at	PTGER3	-2.758	-3.686	-0.915	-0.144	-0.439	-0.641	0.049	-0.92	-0.394	-1.024	0.213	-0.478	-0.333	-1.366	-0.375	-0.476	1.722	-1.331	-0.434	-1.341	-1.791	-1.32	0.835	-0.099	-0.331	-0.342	-0.102	-0.963	0.573	0.968	-0.315	0.029	-0.061	-2.019	0.442	-0.838	0.318	0.866	-1.677	-1.987	0.382	0.473	0.418	-1.79	0.306	-0.045	1.195
class-specific genes	211164_at	EPHA3	-0.458	-0.369	0.64	-1.182	0.848	0.019	-0.439	0.166	0.87	-1.628	0.447	-0.182	0.089	-2.098	-1.829	0.073	-0.395	-2.188	0.439	-0.278	0.091	-1.608	0.42	-0.69	0.226	-0.351	0.564	-0.11	-1.085	-1.634	-2.02	-0.104	0.437	-2.716	0.064	-0.894	0.65	-1.854	0.934	-2.133	0.315	-0.633	-1.159	-0.215	0.612	-0.09	-1.087
class-specific genes	207177_at	PTGFR	-0.068	0.077	-0.221	-1.215	-1.93	-0.374	0.379	-0.036	-2.492	-0.127	0.391	-0.09	-2.588	-0.401	-0.562	0.058	-2.268	-2.422	0.184	-1.693	-2.367	-1.223	-1.342	-0.502	-1.275	-0.529	-0.871	-1.424	-2.253	-0.486	0.098	0.954	-0.104	-1.578	-0.462	-0.388	-0.446	1.039	-0.634	-1.009	-0.538	-0.537	0.345	-1.028	-1.359	0.287	-0.696
class-specific genes	204154_at	CDO1	-1.673	-2.12	-0.337	-0.208	0.107	-0.508	-0.443	0.383	-0.142	-0.895	0.19	-0.665	-0.88	-0.291	-0.526	0.176	-0.433	-0.731	0.19	-0.431	-2.563	0.352	-0.532	-0.95	-2.839	-0.444	-0.43	0.34	0.447	-0.859	0.314	-0.67	0.521	-2.835	-0.389	-0.389	0.132	-2.546	-0.39	-0.386	-0.713	-0.052	-0.004	-0.492	-1.021	-1.69	0.448
class-specific genes	228728_at	C7orf58	-0.224	-0.483	-0.583	-0.237	-0.282	-0.124	0.287	0.966	-0.677	-0.654	-1.512	-0.443	-0.103	-0.057	-0.61	0.551	-1.644	-0.345	0.381	-1.401	-1.727	-0.816	0.458	0.062	-0.611	-0.223	-0.671	-2.184	1.112	-0.576	0.328	-1.341	0.931	-0.464	0.164	0.949	0.912	0.738	-0.303	-0.71	-0.728	-0.895	0.737	-0.244	0	0.667	0.07
class-specific genes	218934_s_at	HSPB7	-1.266	-0.3	-1.019	0.148	-0.041	-1.525	0.153	0.853	1.519	-1.177	-2.809	-0.468	-0.732	0.015	-2.422	0.559	-1.33	-1.075	0.185	-0.271	-0.02	-0.028	0.626	-0.151	0.896	0.983	1.129	-1.031	-0.211	-2.037	0.193	0.014	0.826	-0.058	-1.744	-0.18	0.731	0.272	0.083	-1.782	-0.135	-0.071	-0.913	0.197	-0.728	-1.373	0.699
class-specific genes	202036_s_at	SFRP1	-0.78	-0.879	-0.816	0.49	0.515	-0.604	0.459	-0.004	0.791	-0.235	-0.185	-0.518	-0.663	-0.809	-0.351	0.692	-2.583	-3.12	-1.485	-0.848	-2.591	0.053	1.061	0.434	-0.208	0.374	-0.221	0.033	-0.217	-0.533	0.099	-1.556	0.493	-1.193	0.18	-0.114	0.783	0.456	-0.467	-1.02	0.233	-0.562	-0.496	0.134	0.242	-1.407	0.301
class-specific genes	206156_at	GJB5	1.604	-0.103	0.2	-0.904	3.106	0.751	2.399	-0.017	1.661	0.388	2.295	-0.547	0.484	0.982	-0.607	-0.185	-0.038	-0.806	-0.18	-1.011	-0.475	-1.643	0.149	0.117	-0.015	0.859	-0.009	-1.589	-0.668	-1.643	-0.364	-0.813	1.268	-0.169	0.055	0.004	-0.618	0.382	-0.514	-0.984	1.481	2.174	0.431	-0.809	1.223	0.106	0.264
class-specific genes	210019_at	CALML3	-0.781	-0.757	-0.574	0.809	-0.38	1.181	-0.025	1.4	-0.281	0.523	2.006	-0.644	-1.601	-1.583	-0.163	1.898	0.844	0.286	-0.817	0.233	1.432	-1.26	0.109	1.653	1.684	1.435	-0.776	1.45	1.514	-1.427	0.891	0.055	0.257	0.098	-0.541	-0.099	1.375	-0.773	0.795	0.698	1.04	-0.868	2.016	-1.155	-0.299	0.428	2.503
class-specific genes	204855_at	SERPINB5	0.444	1.471	-0.267	-1.251	1.892	-0.333	0.022	-0.52	0.989	0.696	0.186	-0.086	0.863	0.64	0.912	0.08	-2.607	-1.729	-0.793	0.361	-0.25	0.024	0.143	0.824	-0.109	0.316	-0.021	0.884	-0.436	-0.797	1.948	-0.154	1.925	-1.143	0.97	-0.888	0.392	-1.024	0.144	0.497	0.949	0.909	0.116	-1.83	0.533	1.628	1.136
class-specific genes	223895_s_at	EPN3	0.512	0.542	-0.175	0.779	0.666	0.63	0.014	0.065	0.722	0.638	-0.031	1.037	-0.239	1.116	-0.807	1.773	-0.003	1.368	0.822	0.221	1.919	-0.729	0.29	-0.372	0.36	0.109	-0.353	0.479	-0.201	-1.242	1.155	-0.229	1.903	0.705	0.352	0.129	-0.59	1.062	-2.246	-0.017	0.96	1.204	0.457	0.565	-0.309	0.712	0.267
class-specific genes	220780_at	PLA2G3	0.689	-0.114	-0.913	2.259	-0.098	-1.058	-0.2	-0.748	-0.211	0.18	0.824	-1.037	0.205	-1.327	-1.688	0.381	2.513	2.371	-0.653	-1.064	-1.064	-0.262	-0.176	0.355	0.803	1.874	0.837	-0.576	-0.396	-1.185	-0.952	2.67	-0.334	-0.037	-1.075	0.463	-0.459	0.575	-0.334	0.794	-0.466	2.541	0.36	1.692	2.178	0.219	0.266
class-specific genes	206033_s_at	DSC3	-0.775	-0.468	-1.918	0.577	0.317	0.438	0.115	0.464	1.871	-2.695	0.173	-0.045	1.363	-1.444	1.511	-0.03	-0.71	-2.566	-0.901	-0.811	-0.829	-0.496	-0.8	0.248	0.615	0.679	0.426	0.213	-0.489	-1.215	-0.428	-0.006	-0.173	-0.626	-2.122	-0.465	-1.161	-1.753	0.542	-1.338	1.865	1.963	0.063	-0.212	0.124	0.33	-1.773
class-specific genes	214599_at	IVL	-1.001	0.567	0.323	1.775	0.878	0.128	-0.165	-0.298	0.535	0.481	0.867	-3.478	-2.081	-3.452	-1.317	-1.57	-1.462	-0.828	-1.505	0.809	1.106	0.319	0.133	-1.374	0.048	-0.906	0.976	-1.398	0.354	-1.023	-0.078	-0.024	-1.342	-0.054	-0.929	-1.192	-0.149	0.336	0.55	-2.171	-0.368	-0.071	-0.272	-0.084	0.028	2.761	0.029
class-specific genes	238460_at	FAM83A	0.424	0.708	0.501	1.386	2.15	-0.646	0.853	0.924	1.651	-1.774	0.954	-1.714	-1.944	-0.996	-0.523	0.728	-1.206	-1.673	-0.689	0.936	1.677	-0.761	1.71	1.604	0.206	-0.608	-1.189	0.256	0.199	-1.1	0.886	-2.341	0.571	-0.682	2.653	1.38	0.439	0.608	1.546	0.281	-0.127	-0.047	-0.216	-0.296	0.135	1.123	1.401
class-specific genes	202504_at	TRIM29	0.675	1.142	-0.303	1.281	1.009	0.596	1.246	-0.285	0.901	1.216	1.355	0.734	1.69	-0.386	-0.736	0.838	-0.49	-1.369	-1.851	0.194	0.254	0.668	0.605	0.358	0.483	-0.163	0.606	-0.951	0.043	-2.245	0.415	-1.018	1.294	0.554	0.614	1.317	0.118	0.438	1.223	-0.878	1.285	1.23	-0.363	0.463	0.135	0.867	1.25
class-specific genes	241382_at	PCP4L1	-1.098	-0.498	-3.479	1.031	0.911	-0.722	-0.324	-0.47	0.708	-0.144	-0.419	-1.484	-1.993	-0.06	-3.064	-0.195	-0.798	-0.312	-0.283	-0.658	2.131	-0.254	0.363	-0.105	0.319	-2.913	-0.942	0.278	-0.299	-0.74	-0.41	0.585	-0.316	0.773	-1.624	1.42	0.007	-1.38	-0.251	-2.052	-0.073	0.138	0.217	-0.668	0.105	0.358	0.308
class-specific genes	230398_at	TNS4	0.72	0.621	0.895	-0.633	-2.169	-0.267	0.59	-2.335	-0.007	0.617	0.787	1.112	0.952	0.734	0.148	-0.483	0.025	-1.401	1.214	-1.582	0.904	-0.437	-0.383	0.402	0.029	0.639	1.104	-0.644	-0.692	-0.15	1.057	0.843	1.708	0.349	1.488	0.605	-0.849	0.098	-0.651	-0.179	0.593	0.099	0.498	-0.663	-0.349	1.025	0.897
class-specific genes	231778_at	DLX3	-0.337	-0.848	-2.391	1.119	1.099	-0.135	-0.559	0.641	-1.354	-0.761	-0.844	0.609	-0.124	0.842	-1.472	0.437	-2.189	-2.266	0.321	0.245	0.813	-0.976	1.175	-0.216	1.072	1.257	-0.433	-0.889	-0.976	-1.618	-0.644	1.907	0.53	-0.786	-1.054	0.566	0.962	1.602	-0.509	0	-0.25	-0.111	0.063	1.221	1.455	0.805	-0.654
class-specific genes	213240_s_at	KRT4	-0.988	0.821	-0.141	-0.589	2.622	-0.725	-0.348	0.279	-0.938	0.063	-0.275	1.196	-0.777	0.1	-1.212	0.425	-0.117	-1.281	0.052	0.99	4.122	-0.963	1.466	0.28	0	-0.351	0.865	-0.819	0.202	-0.181	-0.569	0.969	-0.328	-0.544	-0.908	0.549	0.849	-0.303	-0.549	2.836	-0.512	0.057	1.781	-0.411	0.346	-0.007	0.147
class-specific genes	xxx	NA	NA	NA	NA	NA	NA	NA	NA	NA	NA	NA	NA	NA	NA	NA	NA	NA	NA	NA	NA	NA	NA	NA	NA	NA	NA	NA	NA	NA	NA	NA	NA	NA	NA	NA	NA	NA	NA	NA	NA	NA	NA	NA	NA	NA	NA	NA	NA
class-specific genes	212768_s_at	OLFM4	0.29	0.002	0.377	-0.921	-2.074	-0.261	0.493	0.019	0.981	-0.383	-1.704	-0.054	0.449	0.206	0.539	0.489	-1.745	-1.294	0.392	-0.578	0.52	-0.226	0.072	-1.122	-0.059	0.421	0.353	-2.048	0.445	-2.455	3.102	-0.117	1.062	-0.311	0.039	-1.51	0.077	0.55	-0.121	-1.177	1.578	-0.314	-0.486	1.233	1.691	0.072	1.68
class-specific genes	205157_s_at	KRT17	0.795	0.176	-0.336	-1.805	1.557	-0.405	-0.151	0.093	1.837	-0.68	-0.893	-0.684	0.943	0.403	-0.799	0.291	-1.01	-1.064	-0.368	0.754	-1.314	0.134	-1.461	1.254	-0.484	-0.027	0.315	0.151	-2.016	-0.815	0.164	-0.553	-1.454	-1.94	-0.476	-0.055	-1.159	-0.415	-0.481	0.19	1.881	0.676	1.352	1.422	-0.259	0.815	0.281
class-specific genes	219554_at	RHCG	-0.406	-0.171	0.308	-0.245	0.249	0.169	-1.028	-0.84	0.415	1.305	1.172	0.005	0.705	2.232	-0.225	-0.546	0.566	-0.234	0.113	-0.54	1.232	0.391	0.631	0.379	0.149	0.334	-0.019	-0.124	0.496	-1.43	-1.487	-0.544	-1.334	-0.733	-0.342	0.164	0.11	1.357	0.383	0.589	-0.412	1.203	-0.211	-0.489	-0.523	1.064	-0.942
class-specific genes	219936_s_at	GPR87	-0.223	-0.534	-1.153	0.572	1.265	0.85	0.127	-0.508	-0.527	0.294	0.019	-0.608	0.424	-1.252	-0.574	-0.465	-2.865	-1.025	-0.149	0.441	0.257	-1.807	1.137	-1.037	0.818	1.377	1.367	0.473	0.664	-2.122	-1.821	0	-0.677	-2.018	1.832	-1.16	-2.089	0.639	0.383	-0.228	1.046	-0.834	-0.511	0.147	0.968	0.799	0.303
class-specific genes	227736_at	C10orf99	0.426	-0.271	0.388	0.194	-2.27	0.384	0.524	0.399	0.006	0.536	-0.389	0.756	1.081	0.3	0.38	-0.456	0.546	-0.657	-2.252	0.753	-0.96	-1.2	2.696	2.279	1.042	0.671	2.02	-0.161	-0.68	-0.659	-1.348	-0.045	0.346	2.864	1.963	-0.061	0.863	0.347	0.212	-0.412	0.526	-0.235	0	-1.228	0.631	2.721	-0.459
class-specific genes	208126_s_at	CYP2C18	0.493	0.651	0.469	-0.777	0.62	0.172	0.982	-0.426	1.301	-2.729	1.206	-0.577	1.495	-0.014	0.06	-0.045	-0.258	-0.877	-0.689	-2.006	-2.062	0.499	2.109	-0.791	0.754	1.419	0.095	-1.078	0.279	-0.946	2.462	-0.034	1.916	-0.845	0.931	-0.872	-0.35	-0.543	-0.534	-1.802	0.462	-0.522	0.307	-0.992	-1.41	-2.11	0.549
class-specific genes	209351_at	KRT14	-0.45	-0.507	-0.044	-1.125	2.117	1.144	1.104	-1.072	0.917	-1.007	1.594	0.815	-0.434	0.607	-0.741	0.554	-1.653	-0.455	0.21	-0.009	-1.454	0.757	-0.623	1.21	0.215	1.524	-0.458	-0.845	0.292	0.066	-0.501	0.444	0	0.327	-0.198	1.857	0.798	0.685	-0.176	0.163	0	1.242	0.015	1.177	-0.164	1.258	-0.023
class-specific genes	204636_at	COL17A1	0.931	1.017	0.61	0.34	-1.468	0.24	0.517	0.436	-1.155	0.596	1.293	0.185	0.852	1.009	0.409	1.307	-0.74	-0.933	-0.843	-0.762	-1.114	-0.483	0.637	1.104	1.02	0.554	0	-0.593	-0.807	-1.651	2.907	-0.091	3.433	-0.247	0.896	0.372	-0.086	-0.01	0.126	-0.763	0.98	0.89	0.799	-0.246	-0.385	-0.162	0.293
class-specific genes	218677_at	S100A14	-0.251	0.784	0.039	-1.01	0.783	0.801	1.354	-0.739	0.941	0.668	0.511	0.623	0.865	0.075	0.474	0.644	1.608	0.801	0.976	1.241	1.314	1.29	0.655	0.405	-0.688	0.593	0.592	-0.262	-0.104	-0.618	1.753	-0.254	1.922	1.231	2.243	1.058	0.068	-0.752	-0.891	0.752	-1.037	0.198	1.011	-0.938	0.527	1.009	0.462
class-specific genes	xxx	NA	NA	NA	NA	NA	NA	NA	NA	NA	NA	NA	NA	NA	NA	NA	NA	NA	NA	NA	NA	NA	NA	NA	NA	NA	NA	NA	NA	NA	NA	NA	NA	NA	NA	NA	NA	NA	NA	NA	NA	NA	NA	NA	NA	NA	NA	NA	NA
class-specific genes	xxx	NA	NA	NA	NA	NA	NA	NA	NA	NA	NA	NA	NA	NA	NA	NA	NA	NA	NA	NA	NA	NA	NA	NA	NA	NA	NA	NA	NA	NA	NA	NA	NA	NA	NA	NA	NA	NA	NA	NA	NA	NA	NA	NA	NA	NA	NA	NA	NA
class-specific genes	205778_at	KLK7	0.848	0.611	0.333	-1.063	1.419	1.381	-1.617	-0.963	0.759	0.21	0.097	-0.11	-0.408	0.124	-1.717	0.075	-2.127	-0.024	-0.867	1.33	0.713	0.759	-1.076	1.323	-0.6	0.932	0.265	0.04	-1.393	-1.126	-0.215	0.563	-0.135	1.656	0.66	0.775	0.46	0.249	-0.035	0.591	0.603	1.391	1.183	0.502	-0.212	-0.239	0.628
class-specific genes	241990_at	RHOV	0.786	-1.406	0.145	-0.098	-0.415	-0.319	-1.536	0.244	1.75	0.08	0.333	0.536	1.4	0.616	-0.006	0.993	0.459	0.29	0.653	0.72	1.784	1.937	0.97	0.747	1.56	1.038	1.491	0.548	0.697	-0.672	0.218	-1.465	0.414	-1.282	0.312	1.03	0.44	1.531	-0.259	0.017	1.163	0.888	0.202	-1.436	0.108	-0.518	0.33
class-specific genes	241436_at	SCNN1G	-0.067	0.954	0.154	-0.061	0.011	1.051	0.299	-1.578	0.835	0	0.717	0.631	-0.295	-1.934	-0.45	-0.39	-1.175	0.073	-0.577	-1.241	-1.32	-0.91	0.544	0.347	0.559	-0.91	0.473	-0.008	-0.567	-0.321	-1.302	-0.6	-0.234	-1.369	1.329	0.549	-0.227	-1.235	0.339	-0.751	0.745	-0.429	-0.219	-0.576	1.078	0.325	0.836
class-specific genes	206149_at	CHP2	0.084	0.317	0.96	-0.481	0.917	0.938	0.882	0.869	1.048	0.464	0.274	1.354	1.022	0.867	0.933	0.749	0.374	-0.29	0.874	-0.026	-1.054	-0.906	1.545	0.543	1.132	2.911	-0.237	-0.158	-0.184	-0.616	-0.17	-0.459	2.161	-0.447	0.104	-0.571	-0.323	1.99	-0.323	-0.465	3.642	-0.646	-0.389	-0.953	0.646	-0.658	2.173
class-specific genes	205014_at	FGFBP1	0.292	0.478	0.457	-0.829	1.488	0.067	0.783	0.495	0.736	0.043	0.449	0.208	0.64	-0.801	0.242	0.232	-1.526	-0.853	-0.073	-0.582	0.228	0.286	0.312	-0.028	0.025	0.169	0.067	-1.108	-0.361	-0.86	-0.031	-0.174	0.901	-0.339	0.517	-0.594	-0.195	-0.899	-1.055	-1.529	1.559	-0.204	0.492	0.431	0.419	0.061	1.921
class-specific genes	216579_at	GJB4	-1.635	-0.606	0.002	-0.642	2.268	-0.201	0.246	-0.428	-0.042	-0.422	-0.528	-0.173	-0.695	0.869	-1.45	0.493	-1	-2.301	-1.15	-1.649	-1.169	0.117	-0.439	0.017	0.017	0.352	0.409	-1.167	0.105	-2.673	-0.139	0.337	0.74	0.337	-1.045	-0.177	0.145	-0.05	0.1	-0.976	-0.029	0.177	0.471	-1.493	0.163	0.66	-0.296
class-specific genes	228491_at	KRT19	-0.099	0.686	-1.288	0.559	0.547	0.99	-1.303	0.836	0.183	0.993	-0.56	0.714	1.593	-0.444	1.349	-0.404	-1.732	0.839	1.206	0.545	0.519	-0.495	1.527	0.002	-0.396	-0.611	-0.205	0.604	-0.415	-0.313	-1.409	0.167	0.942	0.886	1.337	0.373	1.314	1.243	-0.282	1.093	-0.483	0.114	-0.065	-0.742	-0.562	1.937	0.977
class-specific genes	206125_s_at	KLK8	0.112	-0.708	-0.843	-0.145	0.728	-1.356	-0.07	0.21	0.646	-2.218	0.188	-1.472	-0.702	0.912	-0.735	-0.61	-1.703	-1.022	-1.275	2.285	0.482	-2.159	-1.815	1.589	0.533	0.193	0.642	-2.155	0.488	-1.543	-0.577	0.5	-0.371	1.272	0.654	0.798	0.409	0.841	0.082	0.521	1.383	2.141	1.197	0.599	0.7	0.668	2.314
class-specific genes	210419_at	BARX2	0.041	0.625	0.362	-0.966	-0.877	-0.326	1.103	0.127	0.312	1.057	0.547	0.175	0.677	-1.415	-1.514	1.333	0.983	-1.178	-1.068	-0.916	1.741	-0.016	-0.91	-0.099	0.233	0.899	-0.528	-0.493	-0.455	0.047	0.343	0.853	-0.613	0.515	0.58	1.259	0.967	0.919	0.022	0.259	-0.556	-0.329	-0.351	-0.811	-0.613	0.677	1.291
class-specific genes	205043_at	CFTR	0.385	-0.904	0.219	0.108	-0.106	0.375	-0.08	-0.456	-0.153	-0.479	-0.947	0.227	0.331	-0.149	0.304	-0.965	-1.487	-0.538	-0.327	-0.645	0.233	-0.224	-0.444	0.275	0.047	1.001	0.212	0.259	-0.268	-0.576	0.333	-0.892	1.342	-0.587	-0.909	0.47	-0.909	-0.82	0	-0.685	-1.636	-0.399	1.638	0.701	1.423	1.537	-0.393
class-specific genes	206043_s_at	ATP2C2	0.815	-0.705	0.792	0.138	1.218	0.543	-0.135	-0.302	-0.157	0.414	0.262	0.55	-0.059	-0.374	0.769	0.345	-0.812	0.549	1.258	0.647	1.777	0.856	-0.963	0.001	0.845	-0.677	-0.736	-1.827	0.019	-0.939	1.585	-0.464	1.212	0.814	0.276	0.306	-0.06	-0.334	-1.327	-0.902	-1.031	-1.562	0.465	0.776	0.281	-0.086	0.129
class-specific genes	218963_s_at	KRT23	0.497	-1.039	0.681	1.38	-0.572	0.863	-1.286	1.243	-2.084	-1.357	-1.903	-0.466	-0.829	1.139	1.008	-0.476	-0.884	-0.331	-0.456	1.155	1.986	1.027	0.669	0.809	-0.45	-0.484	-0.424	2.353	0.285	-0.092	0.738	-0.104	-2.201	0.735	0.169	0.673	-0.219	0.102	-0.545	0.587	0.158	0.337	0.897	0.872	0.277	0.859	0.855
class-specific genes	222242_s_at	KLK5	-0.279	-0.027	0.67	-0.911	0.175	0.496	0.174	0.181	0.122	-0.127	0.678	-1.489	-0.899	-0.974	-2.038	0.103	-0.781	-2.931	-0.551	1.373	0.432	-0.075	-0.028	1.109	0.544	-1.321	0.605	-1.242	0.25	-2.034	-0.212	2.497	-0.142	1.051	-0.235	-0.034	-0.774	-0.1	1.366	0.474	-0.49	1.719	0.885	0.068	0.787	0.549	-1.639
class-specific genes	220026_at	CLCA4	0.557	1.623	1.503	-0.167	-0.948	1.619	1.631	1.344	0.627	1.06	0.238	1.007	1.601	0.996	1.472	-0.071	-0.925	-0.897	-0.023	-1.581	-1.874	-1.009	-0.693	0.18	0.377	-1.209	1.133	-1.639	0.318	-0.614	-1.189	-0.987	0.743	0.209	-0.102	-0.17	0.348	-0.467	-0.922	-1.739	-1.598	-0.15	-1.952	-0.327	0.105	0.014	1.505
class-specific genes	xxx	NA	NA	NA	NA	NA	NA	NA	NA	NA	NA	NA	NA	NA	NA	NA	NA	NA	NA	NA	NA	NA	NA	NA	NA	NA	NA	NA	NA	NA	NA	NA	NA	NA	NA	NA	NA	NA	NA	NA	NA	NA	NA	NA	NA	NA	NA	NA	NA
class-specific genes	203691_at	PI3	-0.03	0.059	0.638	0.247	0.398	0.765	0.851	0.119	0.948	0.698	-0.386	0.953	0.419	1.167	1.17	-0.535	-1.608	0.159	-1.186	-0.821	0.914	-0.439	1.918	0.784	0.677	0.84	1.018	1.215	0.351	0.118	2.289	0.408	-0.061	0.053	1.882	1.83	1.366	1.178	-0.101	-0.587	0.691	0.488	-0.747	0.962	0.184	2.12	0.949
class-specific genes	217528_at	CLCA2	0.785	-1.09	-0.357	0.021	-0.556	0.849	0.511	-1.417	0.366	-2.264	1.478	0.584	0.6	0.25	-0.865	-0.055	0.372	-1.207	-0.64	1.362	0.649	-1.121	-0.366	1.951	1.191	-0.434	1.369	-0.378	-1.121	-1.615	0.072	-1.427	-0.11	-0.696	-1.226	-1.662	-1.341	-0.599	0.965	0	1.603	-0.6	0.477	-0.615	0.439	1.333	-1.092
class-specific genes	xxx	NA	NA	NA	NA	NA	NA	NA	NA	NA	NA	NA	NA	NA	NA	NA	NA	NA	NA	NA	NA	NA	NA	NA	NA	NA	NA	NA	NA	NA	NA	NA	NA	NA	NA	NA	NA	NA	NA	NA	NA	NA	NA	NA	NA	NA	NA	NA	NA
class-specific genes	222892_s_at	TMEM40	-0.234	0.525	-0.293	-0.019	0.47	0.732	-0.464	0.06	-1.377	1.019	-0.613	0.213	0.217	0.031	-0.736	1.328	-0.24	0.313	0.277	1.303	0.959	-1.078	-0.691	0.424	-0.387	2.286	0.403	1.474	0.321	-1.768	-1.386	0.19	0.477	-0.8	2.039	1.196	-0.047	-0.029	1.268	0.114	1.062	0	0.36	0.085	-0.987	0.365	1.681
class-specific genes	207935_s_at	KRT13	-1.228	0.384	0.716	-0.679	0.311	-1.113	0.465	0.521	1.509	-0.012	0.704	-1.81	-0.01	0.043	-1.147	0.526	-0.987	0.791	0.782	0.195	0.078	-0.488	-1.312	0.576	-0.772	0.979	-0.169	-0.646	0.238	-0.209	-0.536	-0.708	2.832	0.184	0.796	-1.113	0.46	0.028	0.467	0.33	1.252	0.047	-1.055	-0.736	0.724	0	0.438
class-specific genes	213680_at	KRT6B	0.648	0.223	-0.757	-0.517	-1.092	0.741	-0.141	-0.643	-0.454	0.506	-0.797	-1.384	-1.365	0.982	0.717	0.131	-1.024	-0.985	-0.533	-0.072	-1.254	0.304	0.413	0.943	-0.09	0.253	0.689	-1.196	0.007	-1.128	0	-0.977	-2.039	0.143	0.334	0.183	1.469	0.259	0.32	-0.817	0.931	0.716	-0.16	-0.692	0.325	1.709	-0.439
class-specific genes	235075_at	DSG3	-0.307	-0.119	-0.182	-0.276	1.048	-0.909	-0.193	-1.566	0.328	-1.79	-0.488	-1.345	1.575	0.299	0.375	0.314	-0.795	-0.555	-0.075	-0.535	-1.721	0.833	-0.127	1.437	-0.582	1.357	0.752	0.875	0.475	-0.986	1.035	0.939	-0.626	-0.594	-0.8	1.178	-0.207	-0.17	-0.486	-0.638	1.743	0.521	-0.445	-0.677	0.707	1.524	-0.526
class-specific genes	227238_at	MUC15	-0.722	-0.115	0.013	0.09	-0.337	0.167	-0.376	0.115	-0.766	-0.861	-0.237	-1.934	-2.375	1.426	0.033	0.057	-0.853	-1.534	1.541	0.261	1.774	-0.335	1.863	0.215	0.082	0.3	-0.353	-0.347	-0.032	-0.763	-1.039	0.627	1.371	-0.276	-0.821	-0.597	0.38	-0.334	-0.374	0.638	-0.456	2.53	0.102	-0.672	-0.294	1.679	0.255
class-specific genes	207367_at	ATP12A	-1.262	-0.073	-0.11	3.253	0.692	0.117	-1.502	0.44	0.332	-1.952	-1.672	-0.3	2.161	-2.445	-1.351	-0.487	-2.851	-0.567	1.151	0.728	-1.193	0.571	-0.746	1.036	-1.95	0.916	-1.215	-1.8	-0.227	-0.309	-1.597	0.099	0.086	0.21	0.332	-0.901	0.49	1.614	0.023	-2.79	0.084	0.186	-2.253	-0.677	0.365	0.234	-1.454
class-specific genes	226755_at	LOC642587	-1.246	0.78	-0.76	0.644	1.39	-0.783	-0.405	-0.052	0.815	0.36	1.156	-1.343	-1.299	0.082	-1.178	0.382	-0.022	-0.894	-0.299	-0.881	-0.73	0.161	-1	-1.005	-1.649	1.053	0.559	0.684	-0.916	-2.261	-0.936	0.425	0	-0.404	1.234	0.574	0.389	-0.701	-0.469	-1.736	1.131	0.418	-0.308	-0.888	0.711	0.997	0.658
class-specific genes	207463_x_at	PRSS3	0.055	0.661	0.368	0.414	-0.076	0.31	0.239	0.078	0.313	0.683	0.448	0.334	0.52	0.329	0.672	0.59	-0.375	0.372	-1.495	0.055	-1.059	-0.52	0.103	0.852	1.189	-2.169	-0.721	0.756	-3.409	-1.576	3.269	0.861	2.134	0.713	-0.785	0.339	0.119	0.273	-0.638	-0.324	-0.244	2.49	0.186	0.451	0.565	-0.059	0.27
class-specific genes	xxx	NA	NA	NA	NA	NA	NA	NA	NA	NA	NA	NA	NA	NA	NA	NA	NA	NA	NA	NA	NA	NA	NA	NA	NA	NA	NA	NA	NA	NA	NA	NA	NA	NA	NA	NA	NA	NA	NA	NA	NA	NA	NA	NA	NA	NA	NA	NA	NA
class-specific genes	219727_at	DUOX2	0.913	0.781	1.157	-0.017	-0.932	0.277	0.41	0.63	0.749	0.557	-1.208	0.995	1.744	0.548	1.183	0.207	-1.118	-2.147	-0.372	-1.193	0.5	-1.142	0.279	0.82	1.324	1.224	-0.836	1.172	-0.536	-1.876	3.644	0.059	2.056	-1.467	0.315	0.016	-0.064	0.347	0.783	-0.343	0.211	-1.561	1.025	-1.114	0.059	0.101	-1.682
class-specific genes	210248_at	WNT7A	-1.095	1.026	-0.017	0.711	-0.366	1.175	-1.542	1.128	1.026	0.294	-0.657	-1.248	-1.095	-1.26	-0.366	-0.611	-0.788	1.602	-0.287	-1.615	-0.641	-0.344	-0.175	0.994	1.155	0.88	-0.448	-0.95	1.008	-0.084	-1.35	0.602	-1.908	-0.826	2.024	0.465	-1.917	-1.709	-0.061	-1.497	-0.818	0.655	1.627	0.88	-0.78	-1.253	0.252
class-specific genes	208244_at	BMP3	-2.515	0.682	-1.413	-0.135	1.432	-0.969	-0.224	0.005	-1.751	-0.642	0.918	0.361	-0.169	-0.005	-0.027	0.541	-0.963	-1.173	0.908	0.314	0.825	-0.395	-1.77	-0.378	0.616	-0.33	-0.542	0.475	0.338	-0.468	0.172	-0.868	-0.66	-0.217	-2.204	-0.548	1.219	0.108	0.18	-1.408	0.376	0.617	0.797	0.227	0.658	0.586	-0.355
class-specific genes	220149_at	C2orf54	-0.709	1.242	1.112	0.6	1.232	0.28	-0.254	-0.284	0.574	0.639	0.766	-0.181	-0.214	1.04	-0.175	0.424	-0.659	-0.869	1.341	1.526	2.964	-0.812	0.275	0.434	1.039	1.342	0.886	-2.842	-0.581	-1.184	-0.761	-0.938	-0.084	-1.768	0.54	-0.193	-1.31	0.789	-0.309	-0.569	0.475	0	0.786	-0.079	-0.739	0.797	0.543
class-specific genes	221854_at	PKP1	-0.808	2.423	0.024	0.307	-0.142	0.276	-0.612	0.075	0.129	-0.429	-0.496	-1.244	-0.73	3.362	2.962	0.303	-0.916	-0.957	-0.648	1.744	0.011	-0.517	0.986	0.249	0.305	0.903	0.021	0.321	0.035	-0.366	-0.317	0	0.324	-0.134	-0.401	-0.212	-0.446	0.76	1.127	-1.32	2.278	0.598	0.166	0.142	0.707	2.287	0.59
class-specific genes	212531_at	LCN2	0.762	0.134	0.535	0.299	-1.078	0.581	0.318	-0.061	0.346	-0.033	0.184	0.552	0.225	0.251	0.524	1.617	-0.45	-0.146	1.191	0.369	2.118	1.183	0.78	0.163	-0.102	-0.614	0.141	2.607	-1.87	-0.206	1.724	-0.117	-0.396	-0.439	0.669	0.397	0.252	0.81	-1.012	0.444	0.466	0.32	1.079	0.103	0.634	0.701	1.6
class-specific genes	xxx	NA	NA	NA	NA	NA	NA	NA	NA	NA	NA	NA	NA	NA	NA	NA	NA	NA	NA	NA	NA	NA	NA	NA	NA	NA	NA	NA	NA	NA	NA	NA	NA	NA	NA	NA	NA	NA	NA	NA	NA	NA	NA	NA	NA	NA	NA	NA	NA
class-specific genes	1554541_a_at	GPRIN2	-1.756	0.749	0.337	0.597	-1.633	0.755	1.132	-1.806	-1.289	-0.333	0.144	0.984	0.75	0.123	0.345	-0.685	-1.364	-2.235	-0.595	-2.494	-0.183	1.134	-0.364	1.112	-0.842	-0.718	-2.81	-0.96	-2.336	-0.963	1.745	-1.099	0.814	-0.685	0.279	0.813	-1.147	1.291	0.231	-3.186	-1.428	-0.243	-0.817	0.993	1.583	-1.325	-0.678
class-specific genes	230615_at	DUOXA2	0.573	0	0.761	-0.721	-1.258	0.409	0.28	0.499	0.819	0.307	-0.624	0.669	1.651	0.541	0.949	1.658	0.642	-0.791	-0.965	-0.928	1.422	-0.591	1.029	0.041	0.436	1.437	0.601	2.254	1.163	0.32	4.143	-0.524	2.135	-0.838	-0.771	0.438	1.282	0.488	0.746	-0.969	1.089	0.133	-0.314	1.338	-0.004	0.065	0
class-specific genes	206276_at	LY6D	-0.588	0.703	-1.038	-0.266	1.306	0.234	1.358	1.37	1.179	-0.543	0.609	-1.618	1.466	-0.859	-0.547	0.09	-1.129	0.014	0.328	0.967	0.812	-0.262	-0.851	-0.086	-1.154	2.14	2.092	0.082	-0.95	-0.16	-1.314	-1.161	0.971	0.806	2.615	-0.832	0.409	1.052	0.708	-0.153	1.263	0.088	0.438	0.966	-0.136	-0.349	1.383
class-specific genes	209125_at	KRT6A	1.148	-1.592	-1.218	-0.071	0.404	1.021	0.033	0.089	1.028	0.859	-0.055	-2.625	0.154	0.223	0.434	-1.047	-1.45	-0.703	-1.75	0.789	0.41	0.502	-0.551	-1.574	-1.54	-0.885	0.173	-1.877	0.659	-2.229	-0.92	0.423	-0.28	-0.408	2.44	1.62	-0.01	0.198	-0.601	0.647	1.438	-0.921	-0.969	0.331	0.574	2.121	0.238
class-specific genes	215181_at	CDH22	0.011	-0.754	-0.475	1.848	0.778	0.447	-0.469	1.215	0.495	-0.303	0.112	-1.603	-0.57	-0.617	-0.702	1.916	-1.44	0.47	-0.006	-1.621	-1.124	1.652	-0.589	0.09	0.314	0.984	-0.506	-0.672	-0.209	-1.327	-0.778	-1.243	-0.507	-0.359	-0.995	2.213	-0.087	2.002	0.003	-1.261	0.103	-0.154	-0.222	-0.959	1.646	-0.271	0.067
class-specific genes	207342_at	CNGB1	-1.559	0.676	1.138	-1.265	-0.338	0.914	-1.579	-0.371	1.555	0.993	-0.158	-2.337	-2.207	-1.898	1.016	0.89	-0.792	-0.354	-0.21	-1.053	0.745	-0.716	-0.436	1.969	1.851	1.009	1.488	-0.05	-0.816	-1.29	-2.384	0.5	0.911	0.779	0.693	1.741	0.649	1.197	-0.679	0.804	-0.878	-0.368	-0.2	-0.819	0.718	1.518	-1.072
class-specific genes	215389_s_at	TNNT2	0.182	-2.192	0.458	0.58	0.833	0.454	0.435	0.097	0.69	-0.068	1.09	-1.99	-1.285	0.003	0.225	0.363	-0.366	-0.759	0.582	-0.22	-0.135	0.042	-1.102	-0.983	0.785	-0.476	0.547	-1.325	0.299	0.185	-0.466	0.67	0.492	0.135	0.506	-0.036	0.324	0.195	1.403	0.023	0.001	0.208	-0.465	0.038	0.539	-0.009	-0.143
class-specific genes	235988_at	GPR110	-0.209	-1.154	-1.004	0.414	0.224	-0.279	-0.683	-0.937	1.828	-1.217	0.309	-1.889	-1.438	-1.726	-0.287	1.282	-1.328	-0.339	-0.471	-1.304	1.413	-0.777	-0.693	1.591	0.43	1.75	-0.163	-0.344	0.418	-0.915	-1.077	-0.668	0.111	0.393	-1.054	0.818	-0.52	0.354	0.746	0.123	0.084	1.352	0.604	0.481	-0.374	-0.977	1.471
class-specific genes	205470_s_at	KLK11	0.36	0.161	-1.211	-1.536	1.694	-0.48	1.162	-0.609	1.865	-0.455	0.804	-0.957	0.665	-0.256	0.073	0.757	-2.131	-0.802	-1.08	-0.593	0.617	0.799	-0.58	0.161	0.536	-1.274	0.889	-1.354	-0.727	-1.314	-0.384	0.978	0.652	0.871	1.497	0.454	0.516	0.082	0.529	0.663	0.1	0.431	1.588	0.369	0.54	0.552	0.822
class-specific genes	201884_at	CEACAM5	-0.073	-0.103	0.271	0.086	-0.917	0.186	0.063	0.061	-0.321	-0.013	0.03	-0.091	-0.125	0.119	0.06	1.678	1.446	0.771	0.078	0.159	2.961	-0.051	-0.432	0.31	0.451	0.306	0.035	-1.131	-1.019	-1.852	2.687	-0.199	2.737	-0.131	-0.126	-0.107	0.044	0.021	-0.426	-0.392	-1.733	-0.744	0.155	-0.326	0.259	0.553	2.09
class-specific genes	205490_x_at	GJB3	0.785	0.342	0.784	-0.928	1.547	0.377	0.675	0.631	0.689	0.634	0.127	0.641	0.968	0.509	-0.143	-0.721	-1.984	-0.726	0.67	1.584	0.18	1.033	-1.698	-0.224	0.437	0.039	0.368	0.724	0.463	-1.659	1.744	-1.086	1.273	-0.833	1.427	-0.482	0.14	0.104	-2.893	-0.238	0.542	0.724	0.623	0.604	-0.047	-2.322	0.947
class-specific genes	217681_at	WNT7B	0.469	-0.093	-0.099	0.736	0.307	1.855	-0.802	-0.526	1.398	0.817	0.63	0.489	-1.296	0.166	-0.105	0.269	0.252	-1.547	-0.417	1.579	0.404	-0.976	1.256	-0.122	-0.143	-0.075	-0.544	1.197	0.667	-1.654	-1.152	-0.549	-1.199	-0.28	1.557	1.2	-1.1	0.858	1.14	0.131	-0.402	1.347	1.313	1.398	1.246	0.643	-1.595
class-specific genes	203757_s_at	CEACAM6	0.235	-0.03	0.413	0.529	-0.965	-0.471	-0.171	0.403	-0.097	-0.074	-0.03	-0.13	0.218	0.386	0.345	1.573	-0.169	1.419	0.118	0.558	2.201	0.57	0.725	0.534	-0.08	0.442	-1.08	-1.457	0.126	-2.177	2.568	-0.163	2.581	-0.082	0.289	0.419	-0.001	-0.538	-0.263	0.804	-1.597	-0.168	-0.449	-0.628	0.612	0.984	1.646
class-specific genes	236225_at	GGT6	0.934	0.632	0.68	-0.563	-1.879	0.671	1.382	0.041	0.464	-0.105	0.938	1.51	1.24	0.379	0.48	0.453	1.082	-0.508	1.705	0.299	0.519	0.209	0.179	0.917	-0.164	-1.058	-1.35	-1.312	-0.906	-0.9	1.526	-0.775	0.628	-0.291	0.378	-0.677	1.058	0.342	-0.349	-0.273	-2.136	1.351	0.852	0.314	0.275	0.253	1.08
class-specific genes	206827_s_at	TRPV6	-1.372	-0.119	-1.296	-0.87	2.258	-0.245	2.357	-0.103	-0.186	-0.203	1.266	-0.938	1.091	1.375	-0.111	0.643	0.827	-1.32	-0.075	-0.671	1.319	-0.99	1.14	1.273	0.557	0.687	-0.013	0.265	1.476	0.353	-0.218	-1.059	0.367	1.035	-0.702	0.813	0.706	0.647	0.866	0.916	-0.392	1.168	-0.571	0.901	-0.373	-0.551	0.003
class-specific genes	220414_at	CALML5	0.041	0.739	-0.298	-1.279	0.023	0.7	-0.921	-0.154	-0.232	-0.414	1.527	0.22	-0.654	-1.566	-0.506	1.031	-1.329	-1.488	2.391	1.66	1.425	-1.814	0.896	1.735	0.938	2.351	0.31	-0.153	-0.639	-0.211	-1.199	-2.063	1.717	1.221	0.852	0.235	-0.727	0.469	-0.464	-1.505	0.41	1.063	-0.865	-0.027	1.556	1.711	-0.247
class-specific genes	204733_at	KLK6	1.375	1.447	-0.438	-1.232	0.8	0.373	-0.242	0.587	0.077	-0.227	-0.25	-0.715	-1.49	0.694	0.266	0.354	-0.752	-1.065	-0.671	2.402	-0.349	-1.4	-0.581	0.481	-0.074	-0.51	0.712	-0.92	0.053	-1.011	-0.219	1.135	-0.725	0.755	0.224	1.148	0.478	0.46	1.015	0.487	0.45	3.063	2.273	-0.251	0.628	1.093	1.762
class-specific genes	219752_at	RASAL1	0.8	0.872	-0.216	-0.955	-0.324	-0.021	0.355	-0.953	0.678	-0.169	-0.412	0.012	-0.287	0.568	-0.389	1.103	0.262	-0.902	-0.148	0.245	1.315	0.463	-0.104	-0.721	0.126	-0.654	-0.131	0.612	-0.131	0.609	0.324	1.298	0.323	-0.676	0.011	-0.301	0.745	0.227	0.001	-0.13	0.208	1.024	1.337	-0.942	0.29	0.791	-0.312
class-specific genes	212925_at	C19orf21	0.712	0.873	0.574	0.614	1.763	-0.122	1.232	0.37	0.753	0.462	0.843	0.642	0.272	0.878	1.134	0.584	0.446	0.907	0.805	0.832	0.25	0.597	1.645	0.326	-0.583	-2.202	0.184	0.688	-0.589	0.166	1.646	-1.393	1.993	-1.018	0.98	-0.087	-0.038	0.306	-1.049	0.286	-0.484	0.909	1.514	0.287	0.003	-0.034	1.146
class-specific genes	204503_at	EVPL	0.587	0.61	0.469	1.303	-0.003	-0.249	0.571	1.128	-0.27	0.127	0.352	1.072	0.255	0.905	0.972	0.127	0.626	0.746	-0.406	0.542	0.549	1.3	0.15	-1.287	0.077	-0.623	-0.498	1.625	-0.817	0.042	0.609	0.217	-0.584	0.876	0.676	-0.012	0.412	0.348	-0.969	-0.274	-0.656	0.895	-0.062	0.402	-0.346	0.672	-1.147
class-specific genes	208153_s_at	FAT2	-0.505	-1.591	-0.832	-0.94	-0.249	-1.221	0.918	-0.851	-0.875	-0.945	-0.305	-1.311	-0.158	-1.168	0.251	0.565	-0.497	-0.838	-0.63	-1.768	-0.444	-1.218	1.584	1.099	-0.371	-0.487	-1.107	-0.969	0.026	-0.782	-0.192	0.674	-0.172	0.551	-0.378	-0.464	0.171	0.694	-0.831	0.722	1.898	0.484	-0.167	0.566	0.502	0.44	0.783
class-specific genes	231771_at	GJB6	-0.622	0.432	0.453	-0.722	0.579	1.27	-0.127	-0.962	1.897	-0.127	-0.598	-0.576	-0.212	-0.722	-0.896	-0.257	-0.729	-0.381	-0.801	-0.624	1.426	-0.483	-0.008	0.145	-0.09	0.635	0.072	-0.711	0.102	-0.607	-0.916	-0.837	1.131	0.637	-0.017	-0.089	-0.499	0.246	-0.038	0	1.973	-0.916	-0.592	-0.47	0.876	1.592	-0.366
class-specific genes	231867_at	ODZ2	-1.723	-0.37	-2.814	-0.749	-0.187	0.732	0.51	0.664	0.806	-0.913	0.179	-1.766	-0.926	-1.033	-0.362	0.531	-1.195	-1.955	0.06	0.291	-1.973	-0.813	-0.319	0.309	0.108	1.077	0.184	-0.923	-0.557	-1.382	-0.597	-0.8	0.834	-0.927	-0.024	-0.124	-2.446	-0.567	-0.04	-3.583	1.087	-0.071	0.079	-0.547	-1.995	-1.668	-0.07
class-specific genes	209720_s_at	SERPINB3	0.569	0.966	-0.5	0.736	0.998	-0.122	0.371	0.17	2.483	-1.273	-0.611	0.844	0.125	-1.216	-0.681	-0.439	-1.375	0.154	-1.651	-1.295	-1.375	-0.708	-0.414	1.247	1.622	0.579	-0.886	-0.967	-0.397	-1.848	0.074	-1.308	0.868	-0.21	-1.091	-0.855	-1.076	-0.708	0.84	-1.776	0.355	-0.724	0.306	-0.854	-0.482	1.552	-0.769
class-specific genes	232802_at	SYT8	-2.909	0.289	0.077	-1.476	1.438	-0.066	0.46	-1.347	0.841	0.313	0.409	-0.954	-0.874	-0.363	-0.289	0.419	-2.032	-0.338	-1.927	1.074	-0.432	-0.254	-1.761	0.949	0.905	-1.766	0.843	0.233	0.254	-0.945	1.055	-0.253	1.899	0	0.509	0.251	-0.03	0.736	0.604	-2.229	1.04	0.035	0.703	-1.256	0.111	-0.388	1.096
class-specific genes	225645_at	EHF	0.415	0.205	-0.262	-0.21	0.464	0.098	-0.323	-0.018	0.371	0.26	-0.636	-0.035	0.578	-0.281	0.024	0.5	0.569	0.018	0.244	0.118	0.635	0.779	1.077	0.374	-0.698	-0.56	1.733	-0.311	0	-0.843	0.099	-0.353	-0.159	0.572	0.138	0.561	1.177	0.268	-1.521	0.371	-1.691	-0.22	0.279	0.423	-0.125	0.473	0.232
class-specific genes	209792_s_at	KLK10	0.775	0.25	-0.206	-0.96	1.137	0.715	1.697	-0.099	1.014	0.145	0.479	-0.769	-0.137	0.497	0.51	0.583	-0.624	-0.385	-0.591	-0.552	0.099	1.284	-1.247	2.939	0.178	1.124	0.398	0.326	0.194	-2.483	0	0.191	0.253	1.414	1.692	0.544	0.844	-0.578	0.511	0.723	1.501	0.566	2.319	0.614	0.349	0.431	1.241
class-specific genes	226535_at	ITGB6	0.377	0.908	0.472	-0.626	-0.641	-0.109	0.029	-0.446	-0.537	-0.147	-0.336	0.483	0.92	0.46	0.333	0.077	0.008	-0.028	-0.161	0.912	0.285	1.944	0.496	0.525	-0.206	0.316	-0.912	0.076	0.28	-0.549	1.022	-0.762	0.825	-0.767	1.131	-0.321	-1.339	-0.406	-3.088	0.47	-1.242	0.397	0.488	0.886	0.316	0.163	0.357
class-specific genes	205064_at	SPRR1B	1.105	-1.586	0.141	-0.377	-0.411	-1.57	-1.281	-1.516	0.38	0.643	0.008	-1.308	-0.66	-2.367	-0.859	-0.4	-1.104	-1.988	-1.501	-0.604	-1.507	-0.25	0.59	0.723	-0.155	-1.887	0.796	-2.141	-1.407	-1.528	-1.662	0.155	0.21	0.006	-0.487	0.183	-1.183	0.327	-1.192	-2.311	0.796	-0.326	-1.146	0.137	-1.365	1.996	-0.027
class-specific genes	207381_at	ALOX12B	-1.049	0.208	-0.131	2.4	0.963	1.947	-0.09	-0.09	0.142	-1.022	0.42	-0.86	-0.983	-0.736	-1.09	0.007	-0.423	0.027	-0.269	-0.219	-0.764	-1.072	-0.355	2.004	-0.108	0.473	0.569	-0.189	0.362	1.085	-0.45	-0.923	0.386	1.708	0.012	0.334	0.519	-0.038	-0.681	-1.337	-0.413	0.615	0.755	-0.32	-0.285	0.106	1.001
class-specific genes	218960_at	TMPRSS4	0.535	0.806	0.505	0.825	0.233	-0.012	0.327	0.339	0.001	0.238	0.08	0.466	0.856	0.764	0.571	-0.764	-0.254	-0.554	1.341	-0.129	2.323	1.674	-0.375	0.782	0.13	0.703	-0.587	0.295	0.079	-0.707	1.263	-1.314	0.928	-0.583	0.843	0.638	-0.598	1.117	-2.109	0.334	0.174	0.313	1.157	0.114	-0.447	0.049	0.632
class-specific genes	228360_at	LYPD6B	-0.1	0.374	1.283	-0.041	1.69	-0.96	-1.537	-1.268	-0.226	-0.047	0.578	0.917	-0.433	1.096	0.472	0.339	-0.576	0.938	-0.136	0.457	-0.219	-0.654	-1.206	1.134	-0.548	0.948	0.455	-0.511	-0.636	-0.767	0.175	0.162	-0.915	0	-0.862	0.473	0.937	0.464	-0.648	-0.328	0.051	1.654	1.535	0.599	0.466	0.145	0.14
class-specific genes	238017_at	SDR16C5	-0.258	0.873	-0.017	-1.545	0.957	-0.398	1.175	-0.659	0.875	0.256	0.937	0.132	0.715	0.463	0.064	1.648	1.648	-0.806	0.101	0.46	1.195	-0.515	0.449	0.324	-1.203	0.476	-0.946	-0.074	-0.247	-0.47	3.018	-0.65	2.563	-0.686	1.748	-0.382	-0.006	0.665	-0.275	-0.779	-1.501	-0.187	-0.734	0.098	0.36	0.36	-1.185
class-specific genes	213796_at	SPRR1A	2.095	-0.561	-0.391	-0.286	1.864	0.258	0.145	-0.546	-0.296	1.669	-0.427	0.098	1.965	-0.347	-0.836	-0.059	0.014	-1.225	-0.833	-0.659	0.273	0.613	-0.247	0.393	-0.098	1.489	0.696	-0.302	-0.456	-1.364	-0.63	0	2.546	0.095	-0.072	-0.291	-0.265	0.669	-0.372	-0.743	1.186	0	0.559	-0.347	0.505	2.422	0.395
class-specific genes	204734_at	KRT15	0.103	0.541	-0.209	0.4	1.287	0.721	0.682	0.167	-1.011	-2.231	1.166	-0.131	-0.036	0.841	0.817	1.273	-2.056	0.001	0.345	-0.28	-0.898	-0.115	0.076	2.209	0.282	1.701	-0.364	-0.119	-0.61	0.614	0.464	-1.397	1.072	0.193	0.115	0.256	1.262	0.621	0.323	0.175	1.187	1.606	0.698	-1.141	-0.873	0.405	0.971
class-specific genes	206198_s_at	CEACAM7	0.2	0.906	0.95	-0.202	-2.183	1.084	1.216	0.77	-0.029	0.51	-0.479	0.927	0.713	-0.192	0.88	1.016	-2.235	-1.451	0.426	-0.52	0.317	0.355	-1.678	0.885	-0.769	-0.244	0.838	-0.829	-1.227	0.587	2.264	-0.972	-0.289	0.386	-0.832	-1.182	-0.819	-0.386	0.18	-1.159	0.06	0.26	0.652	0.474	0.668	-0.103	1.024
class-specific genes	201820_at	KRT5	-1.124	0.407	-0.082	-0.297	1.587	-0.764	-0.274	-0.024	-0.476	-0.437	-0.916	0.611	1.523	0.007	0.245	0.413	-0.925	-0.518	0.027	0.494	-2.098	-0.839	-1.445	-0.407	-0.739	1.117	1.25	-1.112	-0.559	-1.181	-1.153	0.299	-1.431	-1.579	0.287	0.55	0.716	0.073	-1.128	0.741	1.812	0.732	0.025	0.754	1.531	1.533	-0.179
class-specific genes	1552797_s_at	PROM2	0.558	0.233	-0.005	0.072	-0.114	0.701	0.991	-0.764	1.798	0.413	0.217	0.89	0.926	-0.136	-0.143	0.362	0.747	0.091	0.386	2.006	1.538	-0.447	4.407	0.287	-0.605	0.049	0.584	-3.263	-0.148	-0.924	0.111	1.242	1.326	1.196	0.376	0.897	1.179	-0.043	-2.111	0.959	0.226	0.854	0.202	-0.303	0.339	1.102	-0.122
class-specific genes	1553031_at	GPR115	0.955	0.46	-1.467	0.149	0.614	0.45	-2.168	0.359	-0.921	-0.068	0.419	-0.148	-1.944	0.04	0.642	-0.998	0.252	-2.624	-2.598	0.7	0.481	-0.209	-2.015	0.205	0.395	-0.715	-1.842	-2.367	-0.744	-1.862	1.243	-0.781	0.388	-0.254	0.053	-1.562	-1.893	-1.83	-2.101	-0.448	0.906	0.011	0.437	-0.363	-1.296	-0.878	0.279
class-specific genes	209800_at	KRT16	0.303	-0.502	-0.902	-1.021	2.41	0.092	0.276	-0.583	1.295	-0.109	0.828	-1.348	1.377	1.457	0.753	-0.326	-0.839	-0.692	0.314	1.095	-1.568	0.606	-0.075	1.234	0.18	-0.011	1.004	-0.407	0.468	-0.273	-1.259	-0.983	-0.218	-0.99	1.352	0.33	-0.601	-0.227	0.321	0.281	0.334	-0.106	-0.343	1.305	0.853	2.305	-0.596
class-specific genes	206191_at	ENTPD3	-1.489	-0.062	-1.183	0.998	-1.439	-1.245	0.795	-1.868	-0.194	-3.456	-0.303	-0.811	1.569	-0.313	-0.902	0.907	-0.283	-2.652	-1.624	-0.664	0.203	-2.238	0.486	-0.065	-0.348	-0.886	0.237	-1.255	0.38	-0.452	1.184	-1.928	0.982	-1.554	0	-0.987	0.854	0.981	-1.481	-0.934	0.125	-2.345	0.057	0.564	0.597	0.893	0.397
class-specific genes	231128_at	FAM181B	0.197	0.66	0.35	0.012	-1.927	0.479	0.527	-0.1	-1.36	-0.924	-1.178	-1.243	-0.33	-2.384	0.014	-1.736	-0.818	-1.096	-1.145	0.131	0.058	0.468	1.129	1.285	-0.854	-0.343	0.618	-0.752	-1.27	-0.816	0.723	0.624	0.929	-2.234	-1.269	0.546	-0.931	0.703	-0.564	-2.195	-1.088	0.704	0.39	-0.871	0.303	0	0.089
class-specific genes	227226_at	MRAP2	0.935	-0.089	0.058	-0.37	1.079	-0.032	0.906	-0.131	0.472	-0.966	-0.597	0.569	1.477	0.378	0.457	-0.338	-0.48	-1.365	-1.275	-0.609	-0.685	1.247	0.494	-1.28	-0.042	-0.808	0.484	0.18	-0.578	-2.375	1.311	-1.775	1.472	-0.207	0.571	-0.31	0.523	0.366	-3.289	-0.156	2.311	-3.541	-0.29	0.609	-0.009	0.574	0.493
class-specific genes	227217_at	WNK2	-0.003	-0.36	0.554	-0.127	-0.288	0.527	0.032	0.369	0.288	0.062	0.875	0.477	0.596	0.701	0.688	1.517	-0.489	0.817	0.961	-0.71	0.49	1.262	0.634	-0.07	0.825	0.777	0.804	-0.572	0.374	-0.434	0.208	0.07	-0.777	-0.057	-2.035	-0.168	0.754	0.888	-0.49	0.253	0.159	0.854	1.525	-0.472	-0.01	-0.035	0.518
class-specific genes	208399_s_at	EDN3	-0.644	0.421	0.679	-0.427	0.497	0.998	1.118	0.072	0.869	1.016	-0.002	1.009	0.516	-0.356	1.011	-0.789	-2.025	-1.466	-2.13	-0.098	-0.137	0.359	1.216	1.595	-0.68	-1.038	-1.408	0.193	-0.988	-2.049	0.554	-2.004	0.764	-1.63	-0.479	-0.061	0.278	-0.554	0.003	-0.656	-0.963	-1.25	0.042	-0.181	1.924	1.007	0.954
class-specific genes	236360_at	FLJ42875	-1.781	-0.051	-0.82	-0.201	-1.261	-1.877	0.778	0.487	0.942	-1.219	1.202	0.52	-2.632	0.669	-0.565	0.299	-2.121	0.202	-2.027	-1.581	-1.592	-1.185	0.852	0.805	0.584	-0.037	-0.17	-2.17	0.083	-0.062	-0.632	0.355	1.043	-1.334	1.144	-0.145	1.21	1.698	1.344	-1.548	-0.52	0.216	0.279	0.622	-1.582	-1.01	-1.278
class-specific genes	204870_s_at	PCSK2	-1.179	-1.363	0.171	-1.219	0.201	0.457	1.252	-1.378	0.301	-0.729	0.286	-0.389	-0.696	-0.514	-0.406	-1.056	-1.056	-0.611	-0.038	-0.394	-0.029	-0.556	-0.175	-0.104	-0.051	0.325	0.661	0.4	0.057	-1.69	-1.173	-1.185	-0.834	-0.623	-1.355	0.878	0.418	1.156	1.398	-1.066	0.784	0.009	-0.78	-1.383	1.127	0.677	0.309
class-specific genes	235468_at	hCG_1776007	-1.341	-0.892	-0.505	-0.631	0.787	-0.489	1.324	1.9	1.113	0.443	1.045	0.446	-1.748	-0.584	-1.244	-0.151	-0.859	-0.96	-0.928	-2.058	0.329	-0.596	0.731	2.159	1.69	1.198	1.463	0.076	-0.311	-1.541	-0.993	0.095	1.221	-0.352	2.357	-0.731	1.096	0.389	1.972	-1.215	1.195	-1.311	-0.498	0.482	-0.665	-0.956	1.047
class-specific genes	219370_at	RPRM	-0.679	-0.34	-0.414	-1.899	0.501	0.321	0.418	-0.166	0.383	0.51	0.48	-2.302	-1.933	-1.458	-2.063	0.281	-3.021	-2.382	-1.954	-3.347	-1.243	-0.621	-0.982	-0.211	0.896	2.094	0.67	-3.735	-0.138	-1.822	0.51	-1.23	-0.943	-0.876	-0.277	0.439	0.402	-0.005	0.064	-2.725	1.112	0.499	-0.612	-0.859	0.228	-0.519	0.729
class-specific genes	203400_s_at	TF	-1.736	-0.141	-2.078	0.663	1.344	-2.06	-1.749	0.259	-0.818	-1.875	0.809	-1.055	-2.316	0.566	-0.185	0.483	-0.768	-1.142	0.274	-0.032	0.658	0.282	1.651	0.531	0.038	0.079	0.242	-0.22	0.091	-0.646	0.688	-1.45	0.565	-0.244	-0.059	-1.108	0.267	-0.104	-0.829	-2.199	-0.061	0.481	-1.006	-1.8	-0.363	-1.409	0.961
class-specific genes	209570_s_at	D4S234E	-0.005	0.591	0.233	-0.657	-0.64	0.283	0.4	0.552	0.523	0.267	-0.587	-0.209	0.285	-0.062	-0.12	0.424	-1.703	-0.472	-1.052	-0.131	-2.742	0.772	-0.894	-1.045	-0.137	0.218	0.413	0.12	0.25	-0.055	-0.16	-0.199	-0.433	-0.872	0.302	0	1.141	0.303	-0.443	0.139	1.568	2.335	-2.06	0.238	0.935	1.404	-0.546
class-specific genes	1555935_s_at	HUNK	0.248	-0.661	1.224	0.693	-0.391	-0.591	-0.677	0.599	-0.235	1.814	-0.753	1.582	1.201	0.201	0.792	-0.633	-3.796	-1.402	-0.174	0.802	0.32	0.816	0.14	-0.058	0.798	0.292	-0.52	0.612	0.222	-0.022	-3.627	-0.291	-2.566	0.843	-3.18	0.999	-0.119	0.143	-0.08	-0.768	0.336	0.434	-0.419	-0.466	1.49	1.353	0.06
class-specific genes	237248_at	PDE11A	0.217	-0.529	-0.525	1.103	0.654	-2.227	-1.933	-2.685	0.586	-2.346	0.438	-0.325	-0.356	-0.232	0.468	0.395	0.119	0.077	0.197	-0.18	-0.989	-1.474	2.064	1.078	0.295	0.642	0.926	-0.865	0.064	-0.78	-2.357	0.811	1.443	0.921	0.374	0.05	0.251	0.877	1.467	1.141	1.219	2.007	-0.225	0.608	1.241	-0.554	0.267
class-specific genes	213997_at	KIAA0574	1.22	-0.577	1.779	-0.517	-0.543	0.891	1.395	-0.186	1.7	0.461	-0.295	2.112	1.898	1.389	0.476	-0.555	-0.652	-1.286	-0.549	1.812	-0.083	1.417	0.618	-0.521	0.928	0.818	-0.174	1.559	0.523	0.778	-1.256	-0.922	1.236	0.487	-0.684	-0.526	-0.053	0.074	0.05	0.548	-0.168	-0.704	-0.673	1.762	1.822	-1.214	-0.112
class-specific genes	204953_at	SNAP91	-0.095	-1.451	0.658	-0.311	1.364	0.259	-1.317	-1.132	0.859	-1.618	0.749	-0.158	-2.868	-0.107	-1.931	0.318	-1.235	-2.115	-0.662	-2.503	-2.034	0.244	-0.385	-0.411	-0.575	1.033	0.935	-1.296	-0.063	-1.883	-0.421	-0.91	0.564	-0.49	0.363	0.552	0.242	-1.426	0.555	-1.797	0.821	-0.493	0.441	-1.733	1.76	0.924	0.229
class-specific genes	241811_x_at	SLC6A4	-1.163	-0.564	-1.08	-0.886	1.627	0.586	0.458	-0.209	1.348	0.492	-1.05	-0.287	-0.898	0.737	0.815	-1.084	1.543	2.326	1.68	0.061	-1.895	0.51	-0.785	-0.329	0.259	0.668	0.012	-0.696	-1.737	-1.369	-1.661	-1.251	-0.571	-1.493	-2.143	0.575	-1.995	-0.822	0.64	-1.353	-0.404	-0.155	-0.376	0.392	0.293	1.484	0.529
class-specific genes	209591_s_at	BMP7	0.914	1.905	1.445	0.925	-0.496	1.745	0.806	0.007	-0.595	1.47	-0.025	1.589	0.829	0.563	-0.618	-2.154	-2.477	-3.232	-0.521	1.297	2.377	0.377	-2.084	-0.355	0.148	0.261	-0.246	-0.037	-1.888	-1.515	0.145	1.006	0.223	1.975	-0.97	1.008	0.16	-2.083	1.198	1.093	1.003	1.322	-0.371	-0.347	0.445	-0.752	-0.44
class-specific genes	214156_at	MYRIP	0.754	0.703	-2.676	-0.308	-2.742	0.831	-0.137	0.49	-0.252	-0.39	-0.479	-0.019	0.008	-0.322	0.76	0.434	-1.839	0.272	-0.18	-1.217	-1.164	-0.657	-0.718	0.209	-0.306	-0.131	-0.165	-0.723	0.103	-0.394	-0.615	-0.156	-0.722	-0.301	-1.304	0.289	0.018	0.788	0.107	-0.299	-2.068	-0.32	-0.45	0.203	0.512	0.825	-0.222
class-specific genes	214589_at	FGF12	-0.171	0.267	0.018	0.813	-0.726	0.945	0.983	-0.219	-0.822	0.283	0.403	-0.575	-1.269	-0.324	-0.259	0.118	-0.314	-0.014	0.805	-0.35	-2.429	0.039	-0.019	0.127	-1.393	-0.066	0.743	-0.635	0.125	0.061	-2.393	-2.037	0.466	-1.589	0.01	0.253	-0.2	-0.562	-0.687	-0.452	-0.602	0.919	1.412	0.323	-1.077	-0.202	-1.394
class-specific genes	210108_at	CACNA1D	0.062	-0.202	-0.455	2.171	-0.584	0.032	-0.832	0.623	0.029	-0.746	-1.198	-0.393	-0.584	0.433	0.653	-0.4	-0.084	1.204	0.841	0.97	-1.259	1.12	0.266	0.734	-0.574	0.546	-0.326	0.873	-0.288	0.423	0.818	0.761	-0.545	0.133	-0.51	0.629	-0.364	-1.3	-1.442	-0.488	-0.842	-0.422	1.538	-1.991	0.402	0.33	0.562
class-specific genes	227949_at	PHACTR3	-1.47	0.509	-0.415	0.702	0.793	-0.258	0.101	1.357	0.191	0.121	0.814	0.422	-1.212	-1.137	1.619	-0.211	-0.429	-0.987	0.021	-0.703	-0.755	0.042	0.142	0.446	0.091	-0.548	0.43	-0.135	0.85	-1.144	0.516	-1.13	-0.105	-0.399	-0.102	0.294	0.448	0.48	-0.074	-0.535	-0.694	0.803	-0.341	-1.834	-1.632	0.551	-0.286
class-specific genes	205413_at	MPPED2	-1.884	-0.385	-0.496	-0.405	0.505	0.003	0.276	0.43	0.382	-0.12	0.115	-1.191	-3.029	-0.432	-1.358	1.092	-0.794	-0.593	-1.079	-0.457	-0.889	-0.829	-1.965	-0.045	-0.668	-0.261	-0.459	-3.303	0.674	-0.682	-1.619	-1.018	-0.649	0.732	-1.289	0.391	2.056	0.877	-0.681	0.152	0.681	-0.521	-1.309	0.082	0.784	-0.209	0.063
class-specific genes	1564377_at	SHANK2	-2.006	0.362	1.265	-0.227	0.77	-1.452	-0.122	-1.176	-0.185	-1.117	-0.345	0.206	-1.361	-0.122	-0.777	-0.752	-0.666	-0.902	-0.932	-0.04	-0.262	-0.418	-0.238	1.827	0.795	-0.818	-0.194	-0.447	0.932	-2.158	-0.301	-0.46	-0.801	-0.715	-0.133	-0.163	-0.176	1.38	1.306	-0.651	1.696	-1.029	0.405	0.758	0.907	1.388	1.531
class-specific genes	214608_s_at	EYA1	0.146	-0.136	0.045	0.346	0.592	-0.105	-1.414	-0.311	-0.944	0.424	0.641	3.13	-2.202	0.228	-1.763	-0.807	-1.649	0.465	-0.382	-1.758	-1.84	-1.67	0.639	-1.179	0.805	1.546	-0.939	-1.847	1.409	-2.741	-0.667	-1.175	0.807	-0.796	-1.128	-0.31	-0.621	-1.346	-0.211	-1.788	0.39	0.459	-0.851	-1.425	-1.016	-0.073	0.722
class-specific genes	230290_at	SCUBE3	-1.274	-1.226	-0.292	0.575	0.473	0.378	-0.382	-0.305	-0.288	0.733	0.002	-0.911	-1.046	1.557	0.675	-0.181	-0.066	1.758	-0.65	-0.303	-0.633	-0.312	0.509	0.726	-0.437	-0.08	-0.245	-0.19	-0.282	-0.991	-0.384	-0.168	1.639	-0.573	-0.377	1.289	-0.377	-0.047	0.55	-0.666	0.068	0.936	0.119	0.096	-0.221	-0.751	-0.572
class-specific genes	1554908_at	HYDIN	-1.287	-1.626	-1.007	0.5	1.599	-0.037	0.332	-1.456	1.01	0.393	0.192	-1.3	0.326	1.239	-0.535	-0.062	-1.051	-1.319	0.347	-0.897	-0.958	1.141	-0.066	-0.355	0.368	1.244	-0.796	1.511	-0.825	-0.363	-1.935	-1.383	0.544	-2.3	0.409	-1.319	0.57	1.263	0.814	-1.279	0.419	0.289	-0.168	0.396	-1.641	-0.939	1.409
class-specific genes	232558_at	LAMC3	-0.463	-0.229	0.237	-2.968	0.039	-0.179	-0.596	-0.023	0.979	0.381	0.708	-4.149	-0.596	-0.422	-0.656	0.202	-0.99	-0.715	-0.257	-2.203	-1.454	0.109	0.427	-1.474	0.822	0.984	0.519	-1.127	0.477	-0.71	-2.051	0.418	1.502	-0.12	0.142	0.085	0.287	-0.997	-0.042	-0.684	0.191	0.622	-0.471	-0.788	0.27	0.229	-1.918
class-specific genes	206128_at	ADRA2C	0.264	0.602	0.674	-0.576	0.201	-0.338	-1.412	0.331	-0.653	-0.316	0.254	-0.362	-0.387	-0.035	-0.074	0.213	-0.318	0.577	1.565	1.19	-0.3	-0.042	0.391	1.511	1.361	1.127	0.4	0.604	0.504	-0.062	-2.503	-0.008	-0.566	0.183	-0.591	0.109	1.206	0.485	-0.16	-0.716	0.891	-0.037	0.709	0.298	0.697	0.456	0.039
class-specific genes	238815_at	LRRTM1	-2.471	-1.911	0.229	-2.485	-0.636	-1.099	0.529	-0.127	-0.049	0.002	0.354	-1.716	-1.881	0.008	-0.201	0.922	0.428	-1.805	-0.18	-1.406	0.092	-1.2	-0.551	1.27	0.85	0.268	-0.814	-0.811	-0.275	-1.602	-0.942	1.43	-1.235	0.235	-1.528	0.183	-0.476	-0.672	0.69	1.114	0.291	1.534	0.107	0.456	1.623	1.5	-0.169
class-specific genes	1569648_at	DACT2	-0.87	0.989	-0.066	0.686	0.338	0.282	-0.72	-2.27	-2.124	-0.323	-1.094	-1.426	-0.994	-0.57	-0.234	0.656	-1.08	0.123	-1.975	-0.244	-1.353	0.166	-0.206	0.035	-1.416	-0.783	-0.808	-1.483	-0.254	-1.025	-0.843	-0.084	-0.43	-0.828	-2.067	-2.01	-0.588	0.216	-2.202	-2.228	-0.155	0	0.316	0.285	0.62	0.876	-0.148
class-specific genes	214961_at	KIAA0774	-1.645	-1.84	0.01	0.582	-0.698	-0.92	0.282	-1.182	-0.812	-1.538	0.451	-1.645	-0.076	-3.037	-1.159	0.966	0.022	-2.084	-0.491	0.452	-2.632	-1.149	0.739	0.154	0.386	1.562	-0.659	-1.041	0.642	-1.723	0.094	-2.222	0.203	-1.507	0.319	-0.049	0.363	-0.827	0.121	-0.385	0.979	-1.017	-0.738	0.544	-0.289	-0.827	-1.088
class-specific genes	232201_at	NKD2	-0.479	1.002	0.588	1.725	-1.803	0.083	-0.632	-0.141	-0.867	0.096	-1.134	0.359	0.233	1.19	0.306	-0.493	-2.056	-1.366	-0.02	-1.49	-1.263	0.37	0.315	0.814	1.456	-0.257	0.493	-0.704	0.963	-0.594	-1.466	-0.678	-1.147	-1.204	0.714	-0.538	-0.458	0.474	-0.58	-1.275	-1.147	0.83	0.753	0.283	2.003	0.642	-0.302
class-specific genes	232275_s_at	HS6ST3	0.014	-1.799	-0.714	-1.153	1.216	0.158	-0.653	-1.171	-0.21	-1.7	0.246	-1.53	-1.732	-0.982	-1.12	0.998	0.603	-2.739	-0.985	0.966	0.62	0.432	-0.882	0.468	-0.156	1.418	-0.267	-0.843	1.34	-1.789	1.064	-0.719	-0.675	-0.267	-0.145	1.516	-0.246	0.293	0.564	0.235	-0.496	-1.58	0.903	-1.231	-0.969	-1.245	-1.502
class-specific genes	226766_at	ROBO2	0.259	-0.054	0.469	-1.371	0.008	-0.042	0.433	-1.364	0.73	-0.445	-2.297	-0.262	0.329	0.98	-0.163	0.227	-0.085	-0.398	-1.387	-2.608	-0.494	-1.446	-0.846	-0.09	-0.445	1.207	-0.104	-0.033	0.421	-1.73	-1.343	-0.383	-0.055	-0.363	-0.578	-1.506	1.016	-0.322	-0.316	-1.109	0.202	-0.385	0.838	0.61	0.794	0.619	0.053
class-specific genes	230551_at	KSR2	0.312	-1.205	-0.792	-2.078	-0.05	-0.173	0.165	-0.93	0.041	1.667	0.33	-0.448	-0.206	-0.063	-0.651	-0.442	-0.998	0.121	-1.312	-0.897	-1.601	0.407	0.437	-2.633	-0.132	0.754	0.278	-0.045	0.536	-2.915	-1.36	1.223	-0.521	0.495	-1.615	0.26	0.586	0.191	0.006	-2.028	-0.1	-0.232	-0.261	0.124	0.474	0.376	-0.554
class-specific genes	206089_at	NELL1	0.346	-0.696	0.847	0.645	-1.377	0.031	-0.126	-0.255	-0.62	0.278	0.465	-0.187	-0.365	-2.628	-2.468	-0.201	-1.917	2.15	-2.4	-0.249	0.067	-1.799	0.212	-0.965	0.986	0.877	-0.056	-0.232	-0.741	-0.447	-0.3	0.05	-0.601	0.42	-2.032	-0.621	-0.741	0.89	-0.936	-2.681	0.188	0.629	-1.152	0.11	1.37	0.619	0.185
class-specific genes	213900_at	C9orf61	-1.793	-0.05	-0.09	-0.864	1.979	0.062	0.432	-0.072	0.73	-1.466	0.697	-0.363	-1.136	-0.996	-0.483	0.913	-2.222	1.468	-0.921	-0.528	-1.897	-0.107	-0.508	0.395	0.311	0.7	0.638	-0.621	0.052	0.001	0.133	-1.006	0.376	0.223	-0.022	-0.943	0.283	1.841	-0.355	-1.56	-0.939	-0.574	-1.356	0.957	0.431	0.863	1.872
class-specific genes	219005_at	TMEM59L	-1.649	1.072	-0.19	-1.151	-0.426	0.133	0.809	-0.26	0.088	-0.97	0.294	-0.949	-0.96	-0.347	-0.532	0.687	-0.199	-0.273	-0.223	-1.265	-1.322	0.62	2.434	-0.018	0.788	2.663	1.04	0.454	0.37	-1.457	-1.204	-0.619	0.274	-0.499	1.413	-0.288	0.288	0.042	0.055	-1.32	0.616	0.097	0.615	-1.268	0.265	0.44	0.962
class-specific genes	211624_s_at	DRD2	-0.708	0.558	-1.401	-1.017	-1.338	0.867	1.067	0.698	-0.93	-0.11	-0.417	-0.083	-1.678	0.271	0.349	0.817	-0.028	0.623	-1.72	-1.791	0.588	-0.138	-0.552	1.034	0.075	1.188	-0.452	0.514	0.91	0.36	0.697	-0.002	0.293	1.278	0.977	-1.004	-0.085	0.614	-0.415	-1.578	1.329	1.132	0.547	-1.291	0.634	1.178	1.452
class-specific genes	238080_at	B4GALNT4	-1.328	-0.507	-0.735	-0.774	-0.13	0.224	0	-0.303	0.265	-0.277	1.053	-0.031	-0.401	2.626	-0.678	0.657	1.65	0.326	-0.093	1.754	1.806	-0.453	-0.054	1.058	0.57	2.737	0.813	1.549	-0.252	-0.799	-1.11	0.673	-0.725	-0.414	1.101	-0.308	1.103	2.538	-0.458	-0.332	1.432	0.251	0.433	1.605	1.238	0.128	-0.504
class-specific genes	213456_at	SOSTDC1	0.881	0.621	-0.096	-0.04	-0.991	0.266	0.647	1.113	1.116	0.082	-1.692	0.958	0.463	0.156	1.186	0.647	-1.473	-1.211	-1.378	-0.485	0.931	1.541	0.515	0.685	-0.959	-0.596	-0.481	1.514	0.271	1.63	-0.27	1.371	0.218	-0.482	-0.787	-0.276	0.437	-0.338	-1.346	2.636	0.964	0.418	0.184	1.673	0.25	0.304	-1.027
class-specific genes	219425_at	SULT4A1	-0.117	0.195	0.385	1.802	1.28	-0.649	-0.06	-0.51	0.843	-1.817	1.351	-1.893	-1.08	-1.565	-1.444	-0.148	0.984	-0.38	-1.298	0.971	-2.216	0.793	-0.635	-0.904	0.954	1.158	0.536	0.916	0.587	-3.229	-1.12	-0.995	-0.058	0.508	0.661	0.535	0.014	0.415	-2.032	-0.245	0.235	-0.923	-0.119	-0.349	1.296	1.212	0.101
class-specific genes	214147_at	C1orf175	-0.711	-0.254	-0.701	-0.582	0.032	1.723	0.839	-0.257	0.666	-0.34	2.324	0.598	0.924	1.963	-1.162	1.66	-0.543	-0.582	-0.815	1.287	0.656	2.342	1.811	0.091	0.517	2.102	-0.627	-0.719	-0.352	0.12	-0.366	-0.798	1.857	0.586	0.2	0.974	-0.338	1.195	-0.513	-0.002	1.524	2.093	0.561	-1.256	-0.21	-0.436	-0.404
class-specific genes	205795_at	NRXN3	0.761	-1.455	-1.674	2.035	0.062	-0.303	-1.348	0.938	-0.42	-1.97	-1.66	1.067	1.295	0.748	1.163	0.188	-0.829	-1.191	-1.74	1.164	-1.792	0.248	-1.332	-0.626	2.564	-1.025	-0.944	1.199	0.269	-0.826	-1.508	1.166	-0.94	-1.09	-0.039	-0.026	0.016	-0.249	0.171	1.54	-0.852	-1.077	-1.223	1.563	-0.874	0.694	-0.271
class-specific genes	232136_s_at	CTTNBP2	1.323	-1.747	0.391	0.621	-0.731	-0.383	-0.934	-0.161	-0.529	-0.058	-1.09	0.456	-0.369	-0.468	0.443	-0.511	-1.339	-0.132	-0.696	0.007	-0.365	0.621	-0.678	-0.057	0.804	-0.686	-0.176	-0.079	-0.301	-0.118	-2.732	1.253	-0.602	-3.138	0.911	0.781	-0.52	-2.608	1.287	0.667	-0.691	0.562	0.924	-0.247	-0.212	0.07	0.137
class-specific genes	228307_at	EMILIN3	-0.901	-0.18	-0.143	0.069	-2.564	0.81	-0.04	-0.14	-1.049	-1.03	0.122	-1.906	-1.237	-1.825	-0.437	-0.002	-3.145	-1.753	-3.101	-1.156	-0.412	-0.298	1.506	1.104	2.319	0.107	0.277	0.954	-1.172	-1.483	-0.827	-0.013	1.189	0.99	1.732	-0.031	1.216	-1.355	0.148	-1.809	0.67	-0.544	-0.019	0.313	-0.153	0.21	0.481
class-specific genes	1555527_at	COL9A1	-1.835	-0.47	-1.161	-0.656	1.315	-0.508	1.684	-1.122	1.888	0.011	-0.633	0.125	-1.437	0.981	1.312	-0.821	-0.205	-0.535	1.279	-0.742	-0.794	-0.298	0.289	0.38	-0.568	-0.777	-0.454	-0.963	2.128	0.088	-1.121	0.973	-0.145	1.462	-0.475	-0.778	-0.17	0.252	0.581	-1.311	0.522	0.056	0.208	-0.281	1.808	-0.044	2.365
class-specific genes	227644_at	RIMS4	-0.8	-0.427	0.425	-0.64	0.183	0.339	0.412	0.001	1.263	-2.091	1.099	-1.257	0.327	-2.346	-0.112	-1.813	0.302	-1.232	-0.138	-0.694	-1.857	-1.119	-1.908	0.633	-0.343	-1.258	1.011	-1.409	-0.886	-0.967	-0.137	-1.105	0.423	-0.008	0.139	1.871	-0.887	1.897	-0.564	-0.914	-0.887	0.604	0.093	-0.104	0.283	0.57	0.578
class-specific genes	1568603_at	CADPS	1.549	-0.102	-0.326	-2.412	-0.272	-0.495	-0.558	1.175	0.332	-2.297	0.023	-0.635	0.125	0.583	0.573	-1.503	0.533	-1.993	-1.073	0.082	-0.86	-1.679	-0.65	1.951	0.49	-0.272	0.934	-0.038	-0.785	-1.292	-0.103	-1.651	1.081	-0.029	-0.01	0.424	0.543	-0.803	-2.549	-0.251	-0.329	-1.177	0.687	0.627	-0.06	0.304	-0.788
class-specific genes	213745_at	ATRNL1	0.077	-1.006	-0.738	0.902	-0.396	-0.712	1.082	0.827	-0.868	-0.086	-0.068	-0.822	-1.414	1.008	-0.822	-0.053	-1.798	3.115	0.114	-1.9	-2.174	0.199	0.76	-0.45	-0.975	-1.19	-1.486	1.043	0.755	-0.23	0.176	-2.858	0.513	-2.581	0.37	0.167	0.678	-0.398	-2.091	-0.647	-0.526	-2.07	-0.81	-0.712	0.414	-0.781	0.3
class-specific genes	236255_at	PLEKHG4B	-0.054	-1.504	-1.117	-0.069	1.107	-0.609	0.635	-1.747	0.343	1.083	-0.269	-1.241	-1.957	-1.385	-0.923	-0.325	0.35	-2.444	-0.146	-0.626	-3.149	0.303	0.846	0.593	1.18	1.189	-0.594	-1.154	-1.656	-2.877	-3.022	0.323	-2.022	-0.127	-0.542	0.471	-0.594	-0.785	0.328	0.68	1.003	0.665	0.233	0.223	0.264	-0.151	-0.432
class-specific genes	244071_at	LOC345630	-2.394	0.656	0.032	-1.193	-0.412	-0.323	-0.199	0.53	0.558	-0.303	0.9	-0.583	0.011	0.835	0.245	-0.075	-0.558	0.053	0.805	0.21	-0.228	0.071	-0.582	0.883	0.869	1.811	1.057	0.456	0.421	-0.946	-0.366	-0.06	0.23	-1.364	-0.486	-0.059	0.638	1.426	0.562	-1.207	0.232	-1.793	0.464	-1.568	0.207	0.4	-0.09
class-specific genes	205723_at	CNTFR	-0.318	-0.302	1.078	-0.32	-0.523	0.193	0.81	-1.284	0.334	-1.339	0.164	-1.239	-2.353	-1.828	-0.835	-1.265	-0.746	-0.813	-0.901	-1.698	-0.182	0.259	0.496	1.782	0.843	1.423	0.334	0.482	-0.844	-0.951	0	-0.036	0.606	-0.387	-0.71	0.085	0.095	-0.464	0.998	-2.092	0.358	0.96	0.79	-1.05	0.888	0.231	0.56
class-specific genes	242344_at	GABRB2	0.723	-2.165	-0.82	-0.494	1.474	-0.692	-0.208	-0.652	1.114	-0.311	-0.425	-0.761	-0.4	-3.546	-0.56	-0.52	-0.7	-0.974	-0.045	-0.649	-1.096	-0.897	0.074	0.394	-0.207	0.117	0.554	-0.098	0.633	-1.082	-0.993	-0.416	0.375	0.047	-0.014	-2.539	-0.212	0.148	0.196	-3.199	-1.369	-0.31	-2.574	0.505	-0.617	-2.112	0.604
class-specific genes	204708_at	MAPK4	-2.262	0.762	0.263	-0.978	1.13	0.344	-0.223	0.644	1.097	0.998	-0.345	-0.159	0.267	-2.113	0.521	-0.962	-0.671	-0.028	-1.953	0.609	-1.123	-0.908	0.27	1.396	-0.419	1.261	-0.799	-0.902	-0.799	-2.433	-0.016	-1.291	1.341	-1.764	-1.898	0.038	-0.28	1.177	0.82	-0.653	-0.081	0.649	-0.782	-1.493	0.929	-1.444	1.551
class-specific genes	1552742_at	KCNH8	-0.223	-0.518	-0.751	-0.13	-0.798	-1.814	-1.178	-0.568	-0.972	0.432	0.211	-1.568	-2.339	0.692	0.448	-2.68	-3.582	-1.938	-1.111	-2.372	-1.026	-0.104	-0.641	1.207	-1.464	1.016	0.428	-0.533	0.212	-2.893	-0.185	-0.843	0.982	0.104	0.268	0.295	0.292	0.574	0.237	-2.614	-0.507	1.081	0.537	-0.353	-0.494	-1.62	0.406
class-specific genes	230378_at	SCGB3A1	-1.528	-0.892	-0.69	-0.807	1.052	-0.63	-0.336	-0.259	1.412	-0.696	1.929	-1.732	-1.515	0.469	-1.832	2.35	1.008	-0.804	-0.277	-1.437	-0.437	0.204	-1.072	0.945	1.53	0.17	-0.565	-0.004	-0.336	0.037	-0.073	0.641	-0.293	-0.759	-0.792	1.439	1.998	1.56	-0.667	-0.208	-0.26	0	0.327	0.721	0.456	-0.289	0.381
class-specific genes	206403_at	ZNF536	-0.442	-1.778	-0.3	-0.426	0.685	0.456	0.274	-0.269	0.133	1.229	0.375	-0.406	-1.381	-1.223	-0.467	0.239	-1.126	-0.318	0.069	-1.213	-1.02	0.028	-0.124	0.571	-0.925	1.256	-0.628	-1.099	0.709	-1.525	-0.269	0.341	0.712	0.267	0.101	-0.142	-0.213	-0.038	-1.397	-1.035	0.382	-0.23	0.347	0.217	0.673	-0.8	-0.29
class-specific genes	230425_at	EPHB1	1.232	-2.053	-1.056	-0.437	-0.064	-1.68	-0.854	-0.053	0.396	-0.632	0.04	-1.696	0.564	1.046	0.546	0.121	-2.132	-0.9	-0.073	-0.459	-0.804	-1.726	-0.219	-1.281	0.199	0.132	0.098	0.008	0.213	0.018	-0.013	-0.164	-0.304	-0.525	-0.454	-1.097	1.804	1.477	-0.524	-2.326	-1.869	-1.763	0.657	-1.498	0.133	-0.492	-0.006
class-specific genes	1569462_x_at	KCNT1	0.382	0.873	-0.92	-1.76	1.428	-1.386	0.093	0.986	0.858	-0.881	0.492	-1.339	-0.15	-0.877	-0.898	-1.283	-0.464	-1.99	-0.508	-0.584	-1.283	-0.526	-1.402	1.12	0.313	1.133	-0.416	0.414	-1.395	-0.449	-0.219	0.559	1.678	-0.954	0.779	-0.994	-2.547	1.177	-2.08	-0.114	-0.862	0.021	0.588	0.879	-0.337	0.08	1.01
class-specific genes	222274_at	ZDHHC8P	-0.66	0.486	-0.959	2.112	0.724	-1.125	-1.663	1.09	0.453	1.195	0.469	1.184	-0.281	0.294	0.523	-2.136	0.206	0.256	-1.328	-0.124	-0.696	1.188	0.829	1.067	0.901	-0.139	0.754	-1.071	-1.26	-2.085	-2.621	-0.269	0.449	1.97	0.497	-0.428	0.337	-0.936	1.715	-0.399	1.028	-1.368	2.016	0.172	0.339	0.651	-0.009
class-specific genes	1558541_at	C8orf79	-0.153	-1.38	0.302	-0.407	-1.902	0.449	-0.984	-3.261	0.689	0.601	-0.024	-0.089	-3.261	-2.046	-2.308	0.143	-1.268	-0.224	-0.866	0.142	-2.127	0.761	-1.679	1.355	-0.372	0.806	-0.893	-0.271	-0.917	-2.681	-0.155	-0.32	0.412	-1.824	1.123	0.465	-0.697	1.162	0.538	-0.547	-1.232	-0.604	-1.904	-0.207	1.044	-1.378	0.711
class-specific genes	205348_s_at	DYNC1I1	0.044	0.375	-0.884	1.428	0.777	0.307	-0.512	0.963	-0.094	-0.583	-0.147	0.154	1.924	0.015	-1.127	-0.004	-0.656	-1.645	-0.514	-0.734	-0.855	-0.348	0.257	0.25	0.643	0.314	0.852	-3.09	-0.002	-0.802	-0.585	-1.016	0.19	-0.139	-0.457	0.184	-0.139	0.16	0.41	-1.359	-0.089	-0.713	-0.844	-1.395	1.426	1.774	0.522
class-specific genes	209956_s_at	CAMK2B	-1.402	-0.766	-0.457	-0.248	0.342	-0.008	-1.986	0.457	-1.344	2.294	1.303	-0.816	-1.626	-2.703	0.276	0.555	-0.902	-0.405	-0.131	2.838	-0.281	1.695	0.461	0.439	0.432	1.22	0.584	0.236	0.299	-0.607	-0.545	-0.403	-0.601	0.284	-1.851	0.307	1.199	1.163	0.16	-0.228	0.55	0.799	0.373	0.807	-0.447	0.586	0.346
class-specific genes	204364_s_at	REEP1	-0.951	-1.091	-0.728	2.33	-1.24	-0.237	0.31	1.558	-0.372	-1.856	-0.277	-0.999	-1.424	-0.623	-0.468	1.126	-0.218	-0.366	-0.283	-0.025	-0.098	-0.261	3.432	0.509	-0.445	-0.431	-0.054	-0.622	-0.658	-0.285	2.186	-0.308	0.944	-0.426	0.944	0.176	0.15	-0.24	0.029	-0.263	0.294	-0.857	-0.967	0.499	0.406	-0.346	0.471
class-specific genes	237094_at	FAM19A5	-0.537	-2.949	-0.049	0.075	0.647	-0.378	0.331	-0.665	0.61	-1.939	-1.977	-1.631	-0.973	0.05	-0.586	-1.522	-0.596	-2.734	-0.17	0.927	-0.868	0.589	-1.618	-1.624	-0.785	0.792	-1.869	-1.016	-0.201	-2.144	-0.12	-0.441	0.29	-1.908	0.547	0.072	-0.924	0.052	-0.006	-1.102	-0.458	-0.15	0.56	-0.447	-2.333	-1.97	0.732
class-specific genes	219277_s_at	OGDHL	-0.727	0.673	-0.932	0.065	-0.192	-0.51	-0.51	-0.321	0.355	-0.658	-0.035	-0.258	-0.295	-1.249	-0.649	-0.394	-0.577	-0.287	0.113	2.547	-1.128	1.563	-0.327	0.499	0.352	0.074	-0.605	1.219	-0.333	0.038	-0.711	-0.116	-1.682	1.477	0.902	0.303	-0.179	-0.008	-0.061	0.005	0.382	0.678	0.591	0.143	0.113	0.76	-0.437
class-specific genes	229831_at	CNTN3	1.091	-0.571	0.597	-2.19	-0.321	0.271	0.649	-0.297	-0.187	0.346	-3.281	1.074	-0.009	0.628	0.606	-0.838	0.221	-0.983	-0.725	-0.558	0.136	0.959	0.376	-0.325	-1.884	-0.218	-0.204	1.564	0.145	-0.903	-1.975	-0.65	-0.703	-2.509	0.463	-0.251	0.907	0.661	-0.364	1.136	-0.751	-1.129	-1.145	-0.276	0.65	-0.155	0.406
class-specific genes	214811_at	RIMBP2	-0.85	0.558	-1.262	0.327	0.772	-1.474	0.518	-0.396	0.483	-0.647	1.454	-3.602	-0.698	0.247	-0.36	-0.034	-1.476	-1.557	-1.853	-1.853	-0.3	-0.588	-0.001	1.444	-0.799	1.408	0.245	0.421	0.446	-2.011	-0.286	-0.294	-0.681	0.685	0.209	-0.712	0.023	1.21	0.701	0.088	0.531	-1.715	0.04	-0.01	0.502	1.32	0.648
class-specific genes	1559033_at	LOC255167	-1.2	0.023	-0.307	-0.062	-1.33	-0.58	0.435	0.161	-0.19	0.237	-0.173	-1.841	-1.143	-1.089	-0.882	-3.913	-0.25	-3.084	-0.773	-0.154	-0.005	-2.402	0.313	0.24	0.617	1.378	0.358	-0.217	0.133	-1.18	-0.351	-0.165	0.492	0.176	0.667	-0.245	0.568	0.842	0.327	-0.838	-0.095	0.62	-0.914	-0.192	-0.519	-0.114	0.775
class-specific genes	205549_at	PCP4	-1.266	-0.665	-0.636	1.782	-1.059	0.222	-0.234	1.128	-0.255	0.981	-1.014	2.171	0.571	-0.601	-0.267	0.518	-1.144	0.007	-1.603	-1.867	0.356	1.364	0.458	-0.488	0.941	0.237	-0.117	2.025	0.179	-0.619	-0.208	2.135	0.028	1.472	-1.099	0.914	-0.804	-1.199	-0.086	-1.806	0.041	0.243	-0.098	0.029	0.869	0.012	0.461
class-specific genes	1555318_at	HIF3A	-0.024	0.318	0.115	-1.821	1.015	0.277	0.446	1.184	-1.464	0.436	0.514	-0.23	-0.372	0.142	-1.472	0.069	-1.759	-2.028	-1.388	-1.157	-1.818	-0.923	-1.159	0.736	0.763	0.645	1.032	-1.978	-1.696	-0.636	-2.47	0.22	-1.421	-0.33	-1.582	0.801	0.604	-0.296	-1.565	0.611	-1.815	0.784	0.317	0.283	-0.258	0.101	0.562
class-specific genes	219714_s_at	CACNA2D3	0.31	-1.011	-2.575	0.49	0.685	0.212	-0.036	-0.023	-0.999	-2.313	-1.729	0.291	-0.227	0.506	0.329	-0.43	-1.28	0.629	0.03	0.522	-1.936	1.091	0.147	0.333	-1.192	-1.192	-2.856	0.123	0.965	-0.348	-1.028	-0.745	0.346	2.98	-1.568	0.062	0.608	0.559	-1.505	1.45	-1.107	0.186	-0.242	-2.226	0.863	0.316	0.676
class-specific genes	226884_at	LRRN1	-2.642	-0.536	-2.467	0.503	-1.476	-1.391	-0.442	-0.556	-0.682	-0.234	-0.169	-2.745	0.626	1.182	-0.752	-0.83	-1.666	-0.234	0.691	0.79	-1.64	0.54	-0.01	-0.402	-1.715	-1.776	-1.27	-0.446	-0.095	-3.055	-1.519	-1.483	-0.791	-2.904	0.067	-0.348	0.002	-1.636	-0.271	0.247	-0.919	0.636	-0.41	0.984	-2.952	-1.045	-0.083
class-specific genes	205678_at	AP3B2	-0.568	-1.937	-1.15	-0.887	0.462	1.101	-0.688	-1.477	-1.539	-0.933	-1.192	0.128	-1.572	-0.38	-1.487	0.008	-1.747	-0.972	0.672	0.944	-1.708	0.341	0.572	1.144	-1.852	0.392	-0.389	-1.601	-1.844	-1.144	-0.813	-1.907	-1.765	-0.132	0.771	1.66	-0.8	-0.598	1.146	-2.283	0.677	-0.303	1.202	-1.133	0.855	0.391	0.636
class-specific genes	229313_at	ANO5	-0.471	0.143	-1.314	-0.926	0.061	-0.049	-0.895	-0.14	0.813	-0.06	0.168	0.954	-0.513	-1.311	0.518	-0.199	-0.078	-0.143	-1.927	-0.157	-0.39	0.757	0.449	-1.088	-1.37	0.495	-1.802	0.336	-1.212	-1.283	0.831	-1.761	1.01	-0.115	0.61	-1.187	0.235	0.256	0.666	-0.828	0.191	0.759	-0.127	-1.601	-1.553	-1.728	0.247
class-specific genes	244572_at	KY	-1.382	-0.324	0.098	0.05	0.716	-1.377	-1.35	-0.409	-0.29	0.02	-0.33	-2.255	-0.767	0.035	-1.681	0.411	-2.193	-0.266	-1.372	-2.474	-1.258	-0.016	-0.789	-0.958	-0.869	0.07	-0.386	-2.919	-0.125	0.692	-1.308	0.618	0.876	-2.333	-0.162	0.236	0.652	0.422	-0.253	-1.121	-0.629	-1.053	-0.076	0.481	-0.976	-1.246	0.422
class-specific genes	239178_at	FGF9	-0.74	0.421	-0.644	-1.027	0.258	-0.064	0.252	0.054	-0.258	-0.878	-0.734	0.415	-0.84	-0.063	0.256	-1.031	-0.599	-1.489	0.271	-0.138	-1.457	-0.849	-0.755	0.585	-0.789	0.547	0.215	-1.466	0.13	-0.744	-0.956	-0.969	-0.352	-0.614	-0.037	-2.363	-0.107	-1.078	-1.629	-0.5	0.334	-0.717	0.079	0.069	1.142	1.511	-0.359
class-specific genes	213707_s_at	DLX5	-1.493	-0.451	-0.259	-0.604	1.642	-1.251	-1.582	-1.242	-0.801	0.91	0.13	-1.623	-1.98	-0.039	-2.22	-0.963	-1.193	-1.508	-1.153	0.108	-0.392	-0.407	-1.086	-1.554	-1.311	-1.221	0.756	-2.564	-0.772	-1.11	0.312	-0.835	-0.528	-0.051	-0.813	-1.345	-0.298	-0.515	0.962	-1.551	1.302	-0.881	0.154	-1.351	0.493	0.661	-0.133
class-specific genes	207981_s_at	ESRRG	-0.146	-2.917	-0.015	0.302	1.044	0.006	-0.525	-0.653	0.954	-0.174	-0.01	-0.33	-1.201	0.701	-0.263	1.013	0.796	-0.544	-1.261	-0.489	0.235	-0.918	0.853	0.585	-0.21	-0.216	-0.647	0.04	-1.484	0.202	-1.94	-2.036	0.063	-0.031	-3.637	-1.019	-0.042	0.372	-0.762	1.034	0.728	-0.076	0.544	-0.727	0.243	0.071	0.147
class-specific genes	229294_at	JPH3	-1.374	-0.571	0.962	0.822	-0.092	-0.392	1.389	-0.519	1.861	0.876	-0.161	-2.02	-1.026	-1.132	-1.604	0.183	-1.133	0.655	2.118	2.753	0.607	-1.355	0.705	1.608	0.006	-0.396	-0.416	-0.826	-0.345	-0.451	-1.744	-0.919	-0.11	-0.788	1.959	-0.032	-0.712	1.134	-0.038	-1.137	-0.251	0.713	1.151	-1.378	0.359	-1.175	-0.476
class-specific genes	208299_at	CACNA1I	-0.884	-0.36	0.102	-0.651	0.853	-1.47	-0.21	0.374	0.417	0.505	0.124	-1.382	-1.561	0.384	-0.386	0.388	0.342	-0.588	0.007	0.323	-0.11	-2.652	0.641	-0.848	-0.468	0.418	0.879	-0.573	0.261	-0.068	-1.301	0.053	-1.147	0.554	0.202	0.479	1.078	0.933	-1.076	-0.447	0.626	-2.271	-1.112	-0.83	0.821	-1.049	0.703
class-specific genes	205350_at	CRABP1	-0.034	-0.013	-1.717	0.072	-1.584	-0.329	-1.232	-0.486	1.07	-0.342	-0.058	0.126	-3.232	-0.577	0.336	0.331	-0.549	-1.315	-1.692	1.515	-0.117	0.918	1.563	-0.968	-0.409	0.407	0.527	-0.61	-2.042	-2.47	-1.684	2.108	0.187	1.86	-0.774	1.038	0.176	0.344	0.192	-0.575	0.654	0.9	-0.509	-1.983	-0.889	-0.329	-1.095
class-specific genes	207413_s_at	SCN5A	-0.824	-1.118	-0.488	-0.149	0.313	-0.515	0.136	0.154	-0.106	-0.633	0.821	-1.26	0.023	0.123	-0.417	0.681	0	-0.567	0.109	-1.284	-0.306	-0.431	-0.824	0.795	-0.377	0.273	0.242	0.339	0.385	-1.078	-0.085	0.269	0.68	-2.323	-0.306	0.232	0.182	0.848	1.093	0.118	0.975	0.317	-1.563	0.28	0.968	-0.154	-0.307
class-specific genes	205262_at	KCNH2	-0.215	0.947	1.127	0.517	-1.123	-0.93	0.266	-0.063	0.048	-1.918	1.31	-0.669	-2.276	0.459	-0.511	-0.652	0.17	-0.999	1.668	1.578	-0.081	2.405	1.39	-0.463	-0.33	0.629	0.723	0.266	0.588	0.084	-0.194	-1.886	-1.748	0.513	0.439	0.355	0.867	0	1.266	-0.601	-0.862	0.817	-0.918	0.271	0.76	0.86	-1.019
class-specific genes	242064_at	SDK2	-0.236	-2.454	-0.179	-0.232	-1.753	0.147	0.584	-0.348	-0.903	0.381	-0.647	-0.718	-1.187	-0.605	-0.738	0.599	-2.736	-0.95	-2.338	-0.485	-1.454	1.559	0.107	-1.12	-1.722	0.571	-0.765	-0.913	0.29	-0.248	-1.122	-2.119	-0.491	-1.805	-0.43	-0.363	-0.168	-0.132	0.473	-1.143	0.907	-0.669	-0.34	1.118	1.067	-1.837	0.56
class-specific genes	225996_at	LONRF2	-2.31	-0.21	-1.661	0.518	-1.643	-1.131	-1.413	0.639	0.325	-0.468	0.663	-2.206	-1.589	-0.582	-0.722	-0.82	0.523	1.164	-0.879	1.135	-1.79	-0.634	-1.475	-1.192	-1.373	-1.139	0.484	-1.165	-0.535	-0.138	-1.2	1.79	-1.837	0.878	-0.51	0.322	-0.024	0.45	-0.218	1.823	-0.47	-0.14	-0.742	0.295	0.059	0.412	0.207
class-specific genes	229288_at	EPHA7	-0.015	0.635	0.725	0.461	0.93	0.927	0.817	0.136	-0.411	-2.013	-2.006	0.141	-0.181	-0.216	-0.759	-1.201	0.116	-1.214	0.122	0.059	-1.233	1.027	-0.017	-0.368	0.527	0.513	0.207	-0.159	0.612	0.166	-0.199	-0.123	0.649	-0.248	0.022	-0.092	0.414	0.473	-0.972	-1.084	-1.044	-0.402	-0.559	-1.07	2.097	1.367	-0.33
class-specific genes	238061_at	LGI3	-0.475	-0.358	-1.11	-0.542	1.289	0.793	-0.12	-0.174	0.868	0.777	0.315	-0.789	0.756	-0.328	-0.067	-0.186	-0.144	-1.817	-1.216	-0.327	-0.749	-0.748	0.235	0.447	0.49	0.199	1.677	0.075	-0.738	-1.689	-1.005	-0.9	-0.148	-0.661	0.736	-0.52	1.248	0.322	-0.04	-1.221	1.603	1.6	1.096	0.281	0.246	-0.53	1.427
class-specific genes	206208_at	CA4	0.008	1.273	1.365	-0.323	-0.061	1.37	1.469	1.047	0.505	0.46	0.017	1.412	0.866	0.953	1.493	1.31	-0.49	0.095	-0.891	-2.187	-0.636	-1.486	-0.123	-2.003	0.058	0.81	0.323	-0.479	0.074	0.683	2.958	2.483	0.798	0.457	0.26	-0.514	0.415	1.386	1.101	-0.537	0.688	0.69	0.733	-1.268	0.078	0.588	0.419
class-specific genes	220156_at	EFCAB1	0.097	-0.619	0.763	-1.289	0.809	0.528	-0.304	-2.453	-0.911	0.396	0.758	-0.944	-2.244	-0.699	-2.315	0.103	-0.555	-1.924	-0.505	-1.26	-2.373	-0.399	-0.003	-0.374	0.112	-0.346	-0.23	-0.682	-1.417	-1.941	0.165	-0.735	0.392	0.333	0.191	0.004	1.357	0.983	0.106	-1.287	0.499	-0.013	-0.61	0.964	0.376	0.28	1.648
class-specific genes	230956_at	FLJ45803	1.974	1.264	-0.802	-0.002	-0.026	1.213	-1.433	-0.666	0.617	1.036	0.933	-0.026	1.989	0.772	-1.219	-1.204	-0.37	-0.999	-0.727	-0.654	-1.156	0.839	-0.509	-1.533	-1.506	0.283	-0.462	0.456	0.393	0.659	0.967	-1.746	-0.618	0.487	-0.192	-0.631	-1.063	1.399	-0.427	-0.847	1.388	-1.352	0.526	0.881	-0.332	1.258	-1.084
class-specific genes	219873_at	COLEC11	-0.587	-1.61	-0.167	-0.134	0.623	-0.601	-0.073	-0.892	-0.618	-0.802	-0.64	-3.515	-0.529	-1.146	-0.553	0.67	-0.983	-1.187	0.15	-0.609	0.206	0.445	-1.035	0.456	-3.578	0.264	-0.257	-2.644	-0.625	0.211	1.014	-0.109	0.791	-1.637	0.732	0.314	0.948	0.292	-2.717	0	1.799	0.654	-0.056	-0.323	-0.233	0.831	-1.094
class-specific genes	215010_s_at	BRSK2	0.429	0.638	-1.833	0.442	-1.296	-1.353	1.08	-1.161	-1.21	-0.596	0.697	0.44	-0.201	-2.266	-1.252	0.975	0.08	-2.003	-0.74	-0.032	0.673	1.226	1.197	1.387	-0.357	1.865	0.716	-1.431	0.82	-0.831	0.708	1.385	1.812	-0.504	1.251	0.071	0.96	-0.595	-0.816	0.404	1.509	0.195	-0.247	-0.094	-1.356	1.113	1.105
class-specific genes	243935_at	FRAS1	-1.108	-0.555	0.807	0.345	1.57	-0.853	0.336	-0.383	1.348	0.196	0.784	0.398	-1.359	0.563	-1.026	0.752	-1.656	-0.086	-1.818	-1.367	0.459	-1.671	-0.657	0.75	1.398	0.657	0.144	-0.776	0.561	-0.913	-1.252	0.406	0.72	-1.001	-1.69	-1.23	0.768	-0.336	-0.812	-0.558	-0.079	0.626	0.416	0.538	-1.516	-0.938	-0.904
class-specific genes	230964_at	FREM2	0.662	-0.619	0.038	0.714	-2.323	-0.823	-0.502	0.367	-0.334	-2.635	-0.108	-1.147	-0.207	-0.579	0.063	-0.921	-1.302	-1.694	1.114	-0.273	-1.707	-1.135	-0.479	-0.053	-2.751	0.178	-0.436	0.608	0.029	0.926	1.098	-1.123	0.337	-0.868	-0.083	-0.365	-0.774	-0.195	-0.293	-0.23	0.11	-1.09	0.81	0.221	1.428	0.67	-0.443
class-specific genes	232054_at	PCDH20	0.753	-0.32	0.759	-0.228	-0.199	-0.532	-0.003	-0.244	-1.365	-0.655	-1.268	0.169	-0.683	0.427	0.731	-1.374	-0.237	1.016	-2.326	-0.522	-0.886	-0.275	-2.397	0.2	-2.787	-1.782	-0.685	-0.16	-0.626	-3.565	-0.073	-0.159	0.901	-1.681	-0.705	0.251	0.307	-0.835	-0.863	-1.189	-0.465	0.259	-0.04	-0.276	-0.165	0.317	0.285
class-specific genes	229985_at	BTNL9	-1.221	-0.453	0.514	-0.36	-0.08	-0.166	-0.617	0.042	-1.312	-1.547	-0.287	0.35	-1.063	0.214	-0.49	1.2	-2.292	-0.825	-0.557	-0.578	-2.158	-1.78	-2.294	0.076	-0.75	0.246	0.361	-2.125	-0.291	1.097	-1.038	0.831	0.466	1.649	-1.089	-0.507	1.492	1.753	1.616	0.197	1.315	-1.19	0.987	0.742	0.091	-1.262	0.483
class-specific genes	1565910_at	FSTL4	0.366	-0.419	-1.047	-1.011	0.13	0.184	-0.052	0.061	0.141	1.558	0.108	-1.249	-1.249	0.939	-0.977	-1.211	-1.248	1.436	-1.369	-0.663	-1.369	-0.093	1.566	1.142	0.613	1.194	0.469	-0.452	1.844	-1.113	-0.79	0.066	0.98	-0.175	-0.274	-0.24	-0.441	0.346	1.213	0.091	0.18	-0.296	-0.39	-0.115	-0.514	0.642	2.907
class-specific genes	xxx	NA	NA	NA	NA	NA	NA	NA	NA	NA	NA	NA	NA	NA	NA	NA	NA	NA	NA	NA	NA	NA	NA	NA	NA	NA	NA	NA	NA	NA	NA	NA	NA	NA	NA	NA	NA	NA	NA	NA	NA	NA	NA	NA	NA	NA	NA	NA	NA
class-specific genes	1553037_a_at	SYN2	-0.41	-0.403	0.676	-0.131	0.576	-1.089	0.662	0.49	0.057	-2.524	1.254	-1.385	-0.417	0.231	-0.216	0.869	-2.992	-0.428	0.182	-1.976	-2.166	0.232	0.427	0.779	1.13	1.426	0.48	-1.348	-2.228	-0.861	1.14	-0.58	-0.835	-0.15	-1.751	-0.648	1.424	-0.584	0.579	-0.673	-0.318	-1.49	0.074	0.304	-0.096	1.023	-1.636
	ID	NAME	GSM325806	GSM179859	GSM152780	GSM152630	GSM138037	GSM117720	GSM117709	GSM89026	GSM76512	GSM76501	GSM53083	GSM46931	GSM46864	GSM46865	GSM46856	GSM89010	GSM46894	GSM46871	GSM46820	GSM38094	GSM38081	GSM179846	GSM137934	GSM117721	GSM76570	GSM76558	GSM53127	GSM53122	GSM46944	GSM46875	GSM301676	GSM203744	GSM137917	GSM89070	GSM88984	GSM76567	GSM76504	GSM53144	GSM53100	GSM46910	GSM53167	GSM353907	GSM231920	GSM179917	GSM152694	GSM152642	GSM137913
pathway signature	KEGG_FATTY_ACID_METABOLISM	KEGG_FATTY_ACID_METABOLISM	0.307	0.411	0.355	-0.138	0.687	0.884	1.837	0.547	0.657	-0.3	-0.631	0.431	1.62	-0.437	-0.783	1.123	0.984	-0.978	1.279	-1.352	-0.089	0.659	1.077	1.564	-0.857	0.471	-0.666	0.716	0.078	1.502	1.187	0.127	1.796	0.512	-0.081	-0.742	0.49	-1.076	-0.976	-0.617	-0.281	-0.203	-0.353	-0.001	0.248	1.377	-0.195
pathway signature	KEGG_GLYCOLYSIS_GLUCONEOGENESIS	KEGG_GLYCOLYSIS_GLUCONEOGENESIS	-0.657	0.913	0.168	0.784	1.724	1.557	1.202	0.691	2.172	-0.435	0.439	-0.706	1.385	-2.047	-0.556	0.774	-0.989	-1.776	-0.468	-0.869	0.463	0.661	2.077	1.993	0.245	0.748	0.166	1.056	-0.085	0.463	1.511	0.052	1.852	1.544	0.486	-0.901	-0.587	0.141	-0.248	-0.877	1.27	-0.614	-0.233	-0.092	0.92	2.021	-0.131
pathway signature	KEGG_PENTOSE_PHOSPHATE_PATHWAY	KEGG_PENTOSE_PHOSPHATE_PATHWAY	0.658	0.416	0.395	0.679	1.179	1.673	1.418	0.94	1.589	0.668	-0.111	-0.749	0.472	-2.165	0.988	0.157	-0.526	-1.834	-0.71	-0.107	1.49	0.358	2.288	0.178	0.474	0.503	-0.63	1.373	0.677	-0.281	2.047	0.54	0.398	1.204	0.775	-0.281	-0.552	0.331	0.055	-0.95	1.957	1.121	0.474	0.865	0.774	1.186	-0.584
pathway signature	KEGG_CITRATE_CYCLE_TCA_CYCLE	KEGG_CITRATE_CYCLE_TCA_CYCLE	1.182	1.167	1.049	0.426	-0.819	0.76	0.956	0.993	0.206	0.048	0.532	0.416	0.972	-0.775	0.513	0.783	0.765	-0.378	1.129	0.62	2.339	2.126	-0.191	0.366	-0.717	-0.985	-0.218	1.738	-0.584	0.566	1.112	0.895	0.225	2.075	-0.223	-0.144	0.019	0.163	-0.676	0.421	0.248	-0.543	-0.603	-0.023	-0.776	0.449	-0.719
pathway signature	KEGG_OXIDATIVE_PHOSPHORYLATION	KEGG_OXIDATIVE_PHOSPHORYLATION	0.042	0.644	1.109	-0.519	1.733	1.009	0.692	-0.035	0.724	0.132	1.146	0.417	1.362	-0.422	-0.64	0.866	0.504	0.292	0.731	0.27	2.447	2.299	0.173	0.829	-0.554	-0.022	0.721	1.764	-0.71	-0.477	0.813	0.97	0.428	1.485	0.705	0.226	0.577	1.264	-0.224	-0.084	0.299	0.663	0.202	0.107	-0.109	0.475	-0.507
pathway signature	RAS	RAS	0.642	0.837	0.702	-0.231	-0.941	0.34	0.564	-0.103	-0.112	0.347	0.157	0.96	0.558	0.274	0.794	0.212	0.359	-1.067	1.157	0.521	0.73	0.713	0.028	-0.706	0.26	-0.702	-1.046	0.218	-0.051	0.343	1.34	0.487	0.584	-0.515	0.326	1.692	-0.361	-0.339	-2.554	1.317	-0.494	-0.817	0.707	0.874	0.22	-0.684	0.167
pathway signature	YAP1	YAP1	2.083	1.433	1.65	0.569	-0.118	0.731	-0.306	1.842	-1.733	1.401	0.001	1.246	0.431	-0.374	0.468	0.83	0.153	-0.62	0.021	0.36	2.814	0.85	0.681	-1.149	-0.277	-1.067	-0.001	0.502	-0.888	0.349	0.166	1.753	-0.795	0.689	-0.117	-0.416	-1.116	-0.413	0.786	0.935	0.632	-0.486	-0.958	0.269	0.139	0.203	-1.12
pathway signature	MYC	MYC	1.936	1.148	1.308	0.867	-0.512	0.909	0	1.137	-1.859	1.593	0.336	1.944	1.032	0.64	0.635	0.344	0.67	-0.029	0.334	1.169	1.996	0.091	0.658	-0.827	-0.251	-0.81	-0.76	-0.008	-0.745	0.651	-0.19	1.026	-1.216	-0.29	-0.012	-0.117	-1.252	-0.826	1.105	1.616	0.559	-0.716	-1.095	0.474	-0.156	-0.421	-1.187
pathway signature	EMT	EMT	-1.631	-1.602	-0.571	-0.048	0.649	-0.82	-0.54	-1.318	0.044	-1.424	-0.104	-2.229	-1.515	-0.523	-1.035	-1.081	-1.401	-0.836	-0.799	-0.548	-1.521	-0.776	0.155	0.485	-0.347	0.397	0.472	-1.004	0.028	-1.339	-1.096	-0.791	-0.43	-0.73	-0.769	-1.355	-0.884	0.485	0.482	-2.46	-0.081	-0.32	-0.723	-0.463	-0.098	0.933	0.872
pathway signature	Hypoxia	Hypoxia	-0.827	-0.53	-0.155	-0.256	-0.113	0.236	0.064	-1.343	1.276	-0.974	-0.149	-1.644	-0.737	-1.207	-0.822	-0.41	-1.379	-1.225	-0.265	0.257	0.546	-1.758	1.511	0.745	-0.055	-0.593	0.821	-0.844	0.416	-0.746	0.453	-0.216	0.577	-0.922	0.589	0.117	-1.282	-0.102	-1.187	-1.911	0.397	-0.907	-0.391	1.575	0.56	0.567	1.211
pathway signature	NRF2	NRF2	-2.03	-0.566	-0.485	-0.655	-0.132	0.306	0.226	-0.869	0.167	-1.701	-0.236	-3.022	-2.73	-2.322	-2.66	-0.314	-3.334	-3.692	-2.072	-1.261	-1.74	-0.675	0.072	0.828	-0.472	0.628	0.33	-0.681	-1.115	-2.977	-0.782	-0.532	0.958	-0.753	-0.483	0.044	-0.321	0.666	-0.542	-3.326	0.663	-0.767	-0.29	-0.471	0.698	0.74	0.277
pathway signature	WNT	WNT	-1.16	0.199	0.374	1.274	-1.341	-0.233	-0.341	0.201	-0.108	-0.926	0.066	-0.931	-1.228	0.49	-0.186	-1.398	-2.38	-2.038	-1.816	-0.975	-1.859	-0.459	0.185	1.716	-0.574	0.476	0.318	-0.393	-0.468	-2.211	-1.129	-1.183	-0.507	-1.046	-0.241	-0.661	-0.32	0.511	-0.328	-2.761	0.482	0.068	0.259	1.167	1.755	1.346	-0.239
pathway signature	Notch	Notch	-1.162	-0.402	-0.342	0.229	-0.691	-1.903	0.109	-0.439	1.624	-0.14	1.046	-1.131	-0.863	0.405	-0.019	-0.291	-2.724	-2.544	-2.202	-1.299	-1.941	-1.705	-0.215	1.887	0.332	0.838	1.263	-1.024	0.435	-0.774	-0.589	-0.755	0.121	-1.399	-0.035	0.576	0.879	1.653	0.254	-0.677	2.458	0.629	0.739	-0.004	0.115	-0.64	1.342
	ID	NAME	GSM325806	GSM179859	GSM152780	GSM152630	GSM138037	GSM117720	GSM117709	GSM89026	GSM76512	GSM76501	GSM53083	GSM46931	GSM46864	GSM46865	GSM46856	GSM89010	GSM46894	GSM46871	GSM46820	GSM38094	GSM38081	GSM179846	GSM137934	GSM117721	GSM76570	GSM76558	GSM53127	GSM53122	GSM46944	GSM46875	GSM301676	GSM203744	GSM137917	GSM89070	GSM88984	GSM76567	GSM76504	GSM53144	GSM53100	GSM46910	GSM53167	GSM353907	GSM231920	GSM179917	GSM152694	GSM152642	GSM137913
selected genes	9358	MAGEA4	-1.985	0.243	-1.007	0.35	-0.603	-1.438	-1.279	0.695	-1.371	0.788	0.217	-0.786	0.164	-2.105	-0.393	-1.645	-0.276	-0.161	-0.278	-0.419	-1.954	-0.056	0.213	-0.621	-1.571	0.841	-0.979	-2.045	-0.594	-0.063	-0.532	-0.246	0.039	-0.295	-1.409	1.096	0.107	-1.543	0.553	-2.019	-0.289	1.676	-0.931	-1.352	-0.038	-0.12	0.428
selected genes	12173	SAGE1	0.517	1.101	1.564	0.237	-1.135	1.305	-0.707	-0.49	-1.135	0.187	0.922	-1.07	-1.325	-1.975	-0.707	-0.207	-1.023	-1.765	-0.951	-1.581	-0.885	-0.08	-0.837	0	-0.2	0.87	1.601	0.995	0.918	-1.956	-0.369	-1.543	-0.152	2.296	0.791	-0.528	0	-0.242	0.377	-0.14	0.054	1.824	1.261	0.421	0.777	-0.18	0.081
selected genes	13508	CD274	-1.751	-0.897	0.082	-0.393	1.171	-0.81	-0.122	-0.952	0.103	-0.354	0.574	-2.752	-2.091	-2.025	-2.308	0.27	-2.086	-2.788	-1.289	-2.649	-1.283	-0.605	-0.052	-0.032	0.352	0.83	0.15	0.379	0.03	-1.94	-1.931	-0.605	-0.982	0.042	-1.36	-0.781	0.579	-0.198	0.478	-1.15	-0.35	-0.54	0.642	-0.525	0.469	-0.275	0.745
selected genes	6890	PDCD1	-0.212	1.308	-0.866	1.144	0.909	1.056	0.622	0.031	1.397	0.842	1.628	0.176	-1.188	-0.32	-1.554	-0.408	-2.364	-1.869	-0.415	-0.541	-0.499	0.225	-0.039	2.133	0.583	0.659	-0.351	-0.284	-1.621	-1.591	0.92	-1.153	1.313	-0.57	1.065	0.328	-1.299	0.497	-0.599	-0.103	-0.606	0.62	-0.267	-0.767	-0.079	-1.359	-0.262
selected genes	7939	CD247	-0.778	-0.614	-0.699	0.214	0.941	-1.155	0.46	-0.712	0.359	-2.51	0.667	-0.347	0.061	0.809	-0.184	0.083	-0.161	0.198	0.044	0.088	-1.773	-1.286	-0.256	0.43	0.239	0.223	0.183	-1.256	0.175	-0.528	-1.348	-1.292	0.336	-0.22	0.973	0.077	-0.429	0.391	0.833	-0.825	-0.145	-2.483	-1.359	0.054	0.369	0.27	0.365
selected genes	11731	PDCD1LG2	-0.708	-0.04	-1.647	0.264	-0.84	-0.991	-0.256	-1.136	0.462	1.936	-1.032	-1.573	-0.75	-1.699	-0.888	-0.833	-0.851	-1.074	-0.824	0.792	-1.248	-0.42	-1.453	0.687	-0.602	0.866	-0.468	-0.929	-1.192	-1.471	-0.159	-0.046	-0.671	-0.588	-0.052	0.202	0.348	0	0.601	-0.905	0.926	0.681	1.27	-0.34	0.664	-1.022	-0.127
selected genes	17736	CTLA4	0.116	0.248	-0.261	0.419	0.88	-0.822	0.308	-2.995	-0.042	-0.1	-0.677	-0.041	-0.031	-0.009	-0.525	-1.58	-0.749	0.511	-0.265	0.146	-0.681	-1.297	-0.147	0.843	-1.744	0.846	-1.142	-0.234	-0.179	-1.609	-1.778	-0.428	0.071	0.521	-1.301	-0.961	0.038	-0.5	0.875	0.187	-0.168	-1.796	0.367	-1.021	1.687	0.564	0.407
selected genes	8573	TNFRSF9	-0.742	-1.462	-0.566	-0.148	-0.993	-1.887	0.648	-1.045	-1.965	-2.781	-1.92	0.32	-1.909	-2.237	-1.536	-0.275	-1.436	-2.79	0.673	-0.602	-1.394	0.234	0.141	1.065	0.811	0.974	0.215	-2.037	-0.071	-2.179	-0.554	-0.433	0.087	0.498	0.563	-0.864	-0.972	-0.718	0.778	0.044	0.386	1.195	0.324	-2.014	0.853	-1.609	1.268
selected genes	9348	TNFRSF4	-0.488	-0.917	0.615	0.615	0.63	0.195	-1.386	-0.013	-0.829	-0.227	0.84	0.556	1.09	0.872	1.099	-0.562	0.324	1.03	0.298	0.685	-0.455	-1.084	-1.348	-0.883	-0.113	-0.674	0.351	-1.161	1.166	1.01	-0.893	-1.222	1.286	0.173	-0.006	-0.745	-0.336	1.531	-0.197	0.459	0.523	-1.453	0.309	1.349	1.871	0.307	-0.355
selected genes	13541	TLR9	-0.626	-0.626	-1.168	-0.826	0.687	-0.276	-2.221	-0.245	0.534	0.326	0.75	-0.618	-0.042	0.426	-1.597	0.304	-0.867	0.111	0.209	-0.216	-0.447	-1.884	0.362	0.588	0.606	0.88	-0.328	-0.4	0.445	-0.603	-0.439	0.465	-1.561	-0.26	-0.945	-0.59	0.066	0.99	0.624	-0.62	0.02	0.2	1.31	-0.386	0.14	0.449	0.634
	ID	NAME	GSM325806	GSM179859	GSM152780	GSM152630	GSM138037	GSM117720	GSM117709	GSM89026	GSM76512	GSM76501	GSM53083	GSM46931	GSM46864	GSM46865	GSM46856	GSM89010	GSM46894	GSM46871	GSM46820	GSM38094	GSM38081	GSM179846	GSM137934	GSM117721	GSM76570	GSM76558	GSM53127	GSM53122	GSM46944	GSM46875	GSM301676	GSM203744	GSM137917	GSM89070	GSM88984	GSM76567	GSM76504	GSM53144	GSM53100	GSM46910	GSM53167	GSM353907	GSM231920	GSM179917	GSM152694	GSM152642	GSM137913
CT antigen genes	169966	FAM46D|169966	0.027	-1.142	0.615	0.217	0.352	-2.25	-0.184	-1.569	0.436	-2.811	-0.107	-2.373	-1.469	-0.851	-1.87	-1.939	-0.354	-0.354	-0.159	-0.267	-0.558	-0.599	0.607	0.962	0.247	0.032	-1.856	0.66	0.409	-0.753	-1.699	0.719	-1.603	-0.333	0.807	0.181	0.074	0.899	0.298	-0.84	0.34	-0.059	0.797	0.58	-0.785	0.331	0.122
CT antigen genes	149998	LIPI|149998	-3.835	0.394	-0.136	-0.377	-1.014	0.031	0.37	-0.375	-0.088	-0.556	-1.253	-0.764	-1.291	-1.118	-3.463	0.228	-0.926	-0.338	-0.669	-0.486	-1.056	-0.654	0.173	-0.113	-0.631	0.329	-0.175	0.783	-0.387	-2.86	0.557	-0.303	-1.709	0.271	-0.117	0.422	0.004	0.512	-0.466	-3.23	-1.039	0.002	0.538	-0.339	-2.136	-3.338	0.274
CT antigen genes	64693	CTAGE1|64693	-3.963	-3.292	-0.8	-0.139	0.842	-1.195	-0.212	-1.106	0.28	-0.896	-0.141	-2.994	-1.225	-1.373	-0.956	0.268	-0.778	-1.01	-2.267	-0.61	-0.881	-1.185	-0.627	0.751	0.637	0.408	0.477	-0.149	0.212	-0.596	-0.287	-0.583	0.229	0.249	-0.448	-0.312	0.22	0.194	-3.834	-0.667	0.273	-0.471	0.616	-0.756	-1.373	-0.078	1.003
CT antigen genes	4253	CTAGE5|4253	0.524	-0.919	-0.335	-1.488	0.15	0.506	0.66	-0.09	0.498	-0.035	-0.685	-0.869	-1.337	-1.105	-0.683	-0.168	0.386	-0.161	-0.856	-1.515	-2.209	1.077	-0.588	-0.937	-0.606	-0.659	-0.291	-0.47	-0.305	0.312	-1.503	-0.077	0.758	-0.609	0.945	-0.24	0.789	-1.412	-2.591	-1.464	0.5	-0.648	-0.572	-1.078	1.522	0.549	0.984
CT antigen genes	55105	GPATCH2|55105	-0.034	-0.916	0.217	-0.391	-0.679	-2.846	-0.945	-0.723	-2.274	0.936	0.083	-0.614	-3.564	-2.756	-1.439	-0.994	-0.089	-0.534	-2.418	-2.477	-0.727	0.23	-3.109	0.754	0.779	0.524	0.662	-0.378	-1.397	-1.487	-0.029	-0.333	-0.106	0.102	0.1	0.145	0.233	-1.118	0.208	-2.479	0.404	-0.856	0.115	-0.289	0.377	-0.435	0.478
CT antigen genes	10765	KDM5B|10765	-0.79	-0.332	0.396	-0.782	0.869	-0.303	0.259	-1.097	-2.192	0.238	0.664	-1.881	-0.495	0.047	0.009	-0.253	-0.052	-0.224	0.004	-1.655	-1.328	-0.047	-1.878	1.11	0.906	0.89	0.198	-1.654	0.277	-0.366	-1.585	0	1.193	-0.996	-0.646	0.443	0.858	-1.288	0.078	-1.002	0.106	0.229	-1.158	0.404	-0.5	0.464	-0.544
CT antigen genes	25853	DCAF12|25853	-0.096	0.359	0.255	-0.212	-0.926	-0.42	-2.002	-0.113	0.155	1.676	0.146	1.532	0.749	1.719	0.777	-0.643	1.132	2.393	0.815	0.745	0.043	-0.188	-0.283	-1.655	-0.216	-2.572	-0.125	0.818	1.419	0.219	0.461	-0.686	0.002	1.453	-1.505	-0.804	0.947	1.038	0.269	1.712	0.224	1.004	0.819	0.012	0.319	0.106	-0.238
CT antigen genes	9125	RQCD1|9125	0.244	0.472	-0.838	0.941	1.31	-0.579	0.41	0.919	-0.108	-0.758	-0.655	-0.963	-0.323	-1.107	-0.747	1.153	0.951	-0.823	0.964	-1.15	-1.131	-1.532	1.357	0.532	0.545	1.049	-0.916	-0.924	-1.052	-0.95	-0.799	0.445	1.243	1.115	0.142	0.284	-0.896	1.432	-0.017	-1.72	0.846	-0.522	1.247	-0.827	-0.837	0.948	-1.249
CT antigen genes	2649	NR6A1|2649	-2.398	0.11	0.207	0.487	-1.059	0.289	-0.036	0.809	-2.711	0.388	-0.371	-0.499	-0.294	-0.559	0.17	-1.131	-0.448	-1.196	-1.478	-0.228	-1.128	-1.43	-0.637	1.322	0.69	0.918	-0.515	-0.479	-0.154	-2.265	-1.988	0.291	-0.24	-0.456	0.34	0.386	0.69	-0.991	0.86	0.004	-0.462	-0.368	-0.234	-1.485	0.079	0.773	-1.085
CT antigen genes	9703	KIAA0100|9703	-1.119	-0.293	-0.076	-0.055	-1.984	-0.007	0.024	0.927	0.832	-0.986	0.001	0.828	0.363	2.56	-0.228	-0.223	-1.132	-1.551	-1.137	1.405	-0.47	1.962	0.442	0.55	0.719	1.977	1.074	0.878	-1.579	0.816	0.273	-1.315	-0.341	-0.797	1.053	0.114	-0.194	1.599	0.198	1.429	-0.015	1.169	-1.084	0.298	-0.328	-0.069	-0.005
CT antigen genes	9043	SPAG9|9043	-1.206	-1.082	-0.278	-0.959	-0.274	-0.433	-0.124	0.304	-0.31	-1.118	0.336	-1.279	-1.021	-1.805	-1.507	0.248	-2.906	-2.779	-2.34	-0.83	-1.06	1.065	-0.723	0.665	-0.024	-0.389	0.661	0.764	-1.865	-2.076	-0.975	-0.289	1.224	-0.626	-0.058	-0.005	0.238	0.89	0.043	-0.639	0.073	-0.064	-0.408	0.181	-0.12	-1.016	0.502
CT antigen genes	84660	CCDC62|84660	-0.276	0.008	-0.241	-0.093	-2.729	-0.174	0.501	-1.98	-1.84	-1.92	-0.127	-1.524	-1.204	-1.143	-0.5	-0.64	-1.058	-1.142	-2.096	-0.227	-2.593	0.591	-0.095	1.481	0.279	0.743	-0.224	-1.664	-1.629	-0.984	-0.217	0.159	0.961	0.235	-0.58	0.236	-0.466	0.465	0.032	-2.172	0.332	0.028	-0.209	-0.291	-0.761	-1.305	-1.211
CT antigen genes	221400	TDRD6|221400	0.893	-0.752	-0.418	0.2	0.144	0.008	0.678	-0.543	0.826	0.307	-0.108	-1.154	-3.314	-0.035	0.172	0.136	-1.181	0.377	-1.43	-2.576	-2.73	-1.147	-2.887	-0.616	-0.34	0.486	-2.662	-1.208	0.298	-0.2	-0.768	0.172	0.149	-0.981	-0.091	-0.248	-0.018	0.289	0.602	-0.372	0.336	1.483	0.46	0.01	0.226	1.274	-0.251
CT antigen genes	80184	CEP290|80184	-2.818	-1.595	-1.948	-1.916	1.179	-0.329	0.742	-0.902	0.391	-1.885	-2.034	-0.083	-0.925	0.135	-0.344	0.149	-1.574	0.278	-0.412	0.082	-1.373	-0.154	-1.502	0.336	0.197	0.047	0.689	0.062	0.316	-0.419	-1.264	0.67	1.154	-1.646	0.115	-1.737	-0.9	1.572	0.864	-0.24	-0.468	0.118	0.853	-1.602	-1.528	0.577	0.632
CT antigen genes	80705	TSGA10|80705	-0.889	-0.089	-1.313	0.313	-1.812	0.832	-1.02	-0.171	0.255	-0.128	-0.844	-3.072	-0.85	0.234	-0.324	-2.287	-2.042	-1.737	-2.909	-0.678	-2.042	0.703	-0.393	0.225	-1.289	1.183	0.523	-0.074	-0.854	-0.543	-1.288	0.223	-2.048	-1.811	-0.339	0.171	-0.087	-0.749	-1.74	-0.799	-0.994	-0.006	0.531	0.239	0.464	0.026	-1.76
CT antigen genes	54477	PLEKHA5|54477	0.101	0.216	-2.169	-0.071	0.529	-0.004	0.152	0.293	0.975	-2.284	0.451	0.124	-0.583	0.338	-0.564	-0.31	-0.343	0.593	-1.827	-1.696	0.126	-1.337	1.208	-1.536	-0.11	-1.831	0.427	-0.884	0.037	0.296	0.253	-0.678	0.424	-1.291	0.492	-0.027	0.039	-0.311	-1.631	0.989	0.21	0.459	-1.22	-0.389	1.295	-1.512	0.716
CT antigen genes	283677	C15orf60|283677	-1.206	0.346	-0.313	-0.264	0.772	-0.117	-1.152	0.322	1.287	-0.461	0.785	-0.943	-1.89	-0.772	-0.978	0.755	-1.064	-0.695	-1.344	-0.845	-0.448	0.768	-0.116	0.525	0.911	0.847	-0.558	0.77	-0.742	-0.86	-0.306	0.702	-3.097	-1.258	0.488	0.279	0.407	0.796	0.165	-1.427	1.048	-0.074	-0.386	-0.433	0.775	-0.091	0.53
CT antigen genes	2515	ADAM2|2515	-0.208	-1.063	-1.574	0.151	-0.471	-1.261	-1.143	-2.078	0.667	0.617	0.386	-1.835	-0.517	-0.02	-0.242	-1.003	-0.467	-0.445	-1.333	-0.654	-0.26	-1.766	-0.572	0.079	-0.052	0.714	0.419	0.059	-1.575	-1.688	0.111	0.301	1.184	0.685	-2.457	0.287	0.967	1.35	1.242	0	0.774	-1.349	0.424	-1.022	0.542	-1.293	-1.542
CT antigen genes	83639	TEX101|83639	0.437	1.842	-0.312	-0.539	0.915	0.241	0.368	0.824	-0.678	-0.696	0.713	0.198	-0.814	-1.417	-0.787	-0.095	-1.544	-0.924	-0.488	-0.741	0.645	-0.542	0.702	-0.41	0.227	-0.595	-0.563	0.847	-1.078	-2.586	-0.88	1.33	1.774	0.169	-0.13	-0.332	-0.095	0.229	-0.389	0.429	0.542	0.046	-0.92	-0.162	0.347	0.05	-0.283
CT antigen genes	203413	CXorf61|203413	-0.028	-1.99	0.269	-0.139	-1.13	0.157	0.56	-0.675	0.238	-2.036	0.515	-1.736	-1.61	0.154	-0.225	-1.095	-0.333	-2.113	-0.733	-0.623	-0.074	-0.113	0.293	-1.184	-0.642	-0.53	0.416	-0.298	-0.334	-0.928	0.217	0.222	-1.283	0.727	-0.621	-0.353	0.049	0.047	-1.373	-0.553	-0.343	3.216	0.158	0.287	0.088	-0.369	0.014
CT antigen genes	84072	HORMAD1|84072	-1.192	-0.966	-0.906	-1.051	1.859	-1.204	0.258	0.008	-1.547	0.901	0.63	0.475	-1.987	0.348	0.008	-0.446	-1.628	-1.049	0.591	-1.021	0.627	-0.943	-0.605	1.189	0.189	-1.194	0.367	-0.943	-1.015	-0.914	0.466	0.472	-1.067	0.371	-0.914	0.242	0.136	-1.466	0.971	-1.046	-0.41	1.693	-1.142	0.563	-0.893	1.149	0.944
CT antigen genes	81569	ACTL8|81569	1.248	0.764	1.131	0.729	-0.411	1.945	-0.965	-0.464	0.344	1.189	-0.606	-0.699	0.802	1.775	-0.336	1.092	-0.762	-0.466	0.287	-0.24	2.582	0.711	0.5	-0.2	1.048	-0.297	-0.928	0.639	-0.681	-0.961	-0.987	0.797	0.161	-0.416	-0.907	-1.091	1.916	0.232	-0.385	-1.797	-0.69	0.553	-0.56	-0.736	0.384	0.173	0.984
CT antigen genes	1761	DMRT1|1761	-0.632	0.899	0.318	1.18	1.751	0.527	0.486	-0.505	0.615	-1.58	0.062	1.847	0.197	-0.632	0.268	0.264	-1.955	-1.79	0.325	-2.028	-1	0.453	0.392	-0.941	-0.522	-0.439	-0.565	-0.676	0.48	-1.636	0.182	-0.309	1.016	1.9	-0.922	-0.64	-0.093	-0.347	-0.527	-0.808	-0.307	2.409	-0.192	-1.869	0.187	0.705	-0.637
CT antigen genes	140690	CTCFL|140690	-0.512	0.196	0.43	-0.673	0.863	0.153	-0.43	-1.156	1.064	0.924	0.851	-0.359	-1.311	-1.625	-0.994	-0.333	-1.414	-1.165	-0.368	-0.57	-2.356	-3.256	0.323	0.909	1.029	0.921	0.312	-0.292	-0.468	-1.865	-2.598	0.711	-0.786	-0.062	-0.627	1.641	0.988	-0.358	0.283	-0.183	0.357	1.435	-0.369	0.516	0.159	-1.726	0.985
CT antigen genes	10643	IGF2BP3|10643	0.874	0.827	0.95	-0.303	-0.879	-0.356	0.173	1.691	-0.173	0.877	1.471	-2.371	-2.929	1.099	-2.944	-1.182	-0.353	-1.563	-0.16	-2.327	-2.614	-0.497	1.579	-1.621	-0.953	0.412	-0.549	-2.04	0.16	-1.871	1.301	-0.677	0.439	-1.381	-0.898	-0.225	1.145	-1.066	-0.479	-1.813	1.206	1.9	1.733	0.595	0.676	0.855	-0.581
CT antigen genes	29028	ATAD2|29028	0.563	2.006	0.853	0.532	-0.483	0.714	-0.625	1.264	-1.703	1.259	0.417	2.043	-0.064	0.236	-0.271	0.554	0.676	-0.361	-0.289	-0.424	1.131	-1.359	0.837	-0.305	0.364	-1.988	-0.377	-1.461	-0.306	0.253	-0.231	0.477	-0.734	0.158	-0.666	0.599	-0.735	-0.319	1.587	0.976	0.217	-0.747	0.28	-0.394	-0.864	-0.452	-0.863
CT antigen genes	57082	CASC5|57082	-0.16	0.051	-0.553	-0.55	0.315	-1.182	0.646	-0.324	0.289	0.138	-1.069	-0.282	-2.69	-0.646	-1.831	0.814	-0.132	-1.716	-0.312	-0.442	-2.239	-1.897	-0.201	0.463	0.424	0.959	-0.026	0.289	-1.141	-1.744	-0.147	-0.09	0.786	0.096	0.665	0.061	0.618	-1.669	0.376	-1.386	0.71	0.285	0.256	0.78	-1.607	1.129	0.223
CT antigen genes	9585	KIF20B|9585	0.761	0.405	0.443	-0.865	-0.313	-0.761	-0.283	0.703	-0.028	2.757	1.747	1.304	1.609	-0.427	0.5	0.579	0.596	-0.172	-0.52	-1.344	0.016	-1.113	-0.588	0.598	0.07	1.554	1.178	-2.208	0.673	-0.245	-0.711	-0.279	0.169	0.548	0.491	0.174	-0.421	-0.146	0.711	1.545	1.74	0	0.709	-0.479	0.959	-0.331	-0.418
CT antigen genes	11004	KIF2C|11004	0.606	0.147	0.819	0.457	1.558	1.477	0.427	0.886	-2.106	1.169	-0.042	0.84	0.242	0.031	-0.779	0.323	0.054	-0.982	0.476	-0.338	0.7	-1.426	0.819	-0.138	0.836	0.705	-0.296	-0.642	-1.255	-1.15	-0.394	0.559	-0.296	0.248	-0.387	-1.114	-0.502	-1.11	1.058	1.217	0.052	0.592	-0.808	-0.144	-0.515	-0.282	-0.784
CT antigen genes	55165	CEP55|55165	1.289	1.441	0.756	-0.085	0.361	0.973	0.271	0.016	-0.933	1.27	1.65	1.421	1.343	-0.141	0.082	0.134	0.961	-0.095	0.514	-0.242	1.083	-0.083	0.657	0.146	0.478	-0.928	-0.18	-0.595	-2.411	0.03	-0.107	0.637	-0.481	0.397	-0.844	0.274	-1.11	-0.664	1.005	1.934	1.241	-0.077	0.199	0.774	-0.073	-0.444	-0.865
CT antigen genes	83540	NUF2|83540	0.589	0.308	-0.033	0.663	0.933	-0.126	0.041	0.234	-1.135	0.874	0.301	1.099	0.027	0.748	0.244	0.185	0.798	-0.045	0.724	0.045	0.419	-0.514	-0.056	-0.039	0.599	0.776	0.59	0.354	-0.491	-0.092	-0.416	0.66	-0.532	0.062	-0.947	-0.862	-0.564	-0.792	1.708	1.045	0.692	0.315	-0.535	-0.027	0	-0.234	-1.043
CT antigen genes	7272	TTK|7272	1.554	0.641	0.225	0.076	1.007	0.428	-0.5	0.781	-1.484	1.146	1.066	0.853	0.236	0.416	-0.53	0.513	0.371	-0.561	0.056	-0.065	0.188	-0.567	0.078	0.342	-1.051	1.322	-0.194	-0.593	-0.31	-0.417	-0.344	0.639	-1.866	-0.292	-1.329	0.196	-0.29	-0.323	0.581	0.833	1.26	1.203	-0.347	0.281	-0.719	-0.825	-0.969
CT antigen genes	55872	PBK|55872	0.233	2.17	0.374	-1.026	1.224	1.144	0.069	-0.64	-1.033	0.544	0.126	0.309	1.051	-0.68	-0.685	0.091	1.269	0.478	0.437	0.862	0.835	-0.153	0.373	1.06	1.082	0.635	-0.907	0.281	-1.222	-0.537	-0.225	0.579	-0.211	0.742	0.24	0.06	-0.952	-0.292	0.234	2.704	0.595	-0.708	-0.181	0.523	-0.261	-0.255	-1.217
CT antigen genes	11339	OIP5|11339	1.708	1.267	1.247	-0.292	1.82	0.597	0.699	0.927	-1.109	1.94	1.124	1.142	1.337	-0.113	0.716	0.803	0.725	0.596	0.23	0.027	2.227	0.018	0.431	-0.316	-1.148	0.022	0.381	-0.122	-0.374	-0.312	0.318	0.118	-1.468	-0.238	-0.732	-0.555	-1.787	0.152	-0.416	1.116	0.873	0.034	-0.123	0.795	-0.076	0.136	-0.993
CT antigen genes	4957	ODF2|4957	0.201	0.395	-0.453	0.61	-0.433	0.525	-1.031	0.903	0.262	0.934	-2.213	0.637	0.201	0.265	0.581	0.72	0.495	0.121	0.309	0.658	-0.042	1.174	-0.102	1.082	1.853	-0.05	0.013	-0.394	1.772	-1.525	-0.757	-0.211	-2.275	-3.045	-0.331	-1.813	0.064	1.238	-0.248	0.276	-1.523	0.915	-0.322	0.79	-0.5	0.521	-0.199
CT antigen genes	10761	PLAC1|10761	0.572	-0.236	-0.257	-2.212	0.523	-0.391	-0.357	0.074	-2.055	-0.205	-0.593	-1.975	-1.005	-0.431	0.327	-1.303	-0.635	0.076	-2.922	-0.138	-0.225	0.45	-0.652	-1.096	0.764	0.889	-1.545	-1.31	0.135	-0.744	-0.069	0.817	-0.907	-0.511	-0.386	1.282	0.061	0.719	-1.92	1.243	1.222	1.378	0.347	-1.338	0.141	-0.895	0.326
CT antigen genes	151871	DPPA2|151871	-0.978	0.288	-1.757	-0.309	0.686	-1.132	-1.369	0.404	1.023	-1.515	0.637	-0.654	-1.626	-2.145	-1.555	-1.035	-1.643	-1.807	0.31	-0.256	0.001	-0.005	0.354	0.518	0.9	0.937	0.211	-0.546	-0.01	-0.636	-0.193	0.802	-0.991	-0.099	0.032	-2.195	-1.866	0.549	-1.798	0.51	-1.717	-0.482	0.039	-0.41	0.721	0.267	-0.628
CT antigen genes	27136	MORC1|27136	-1.943	-0.886	-0.851	-0.306	1.274	-0.566	0.854	-2.391	-0.018	0.934	0.923	0.002	-1.786	0.564	-1.134	0.743	0.415	0.107	-1.872	-2.134	-1.351	-0.029	-1.46	1.255	-0.6	-1.689	1.206	-0.441	0.622	-0.828	-0.492	-0.8	0.966	0.324	-0.312	0.626	0.265	-0.998	1.093	-2.617	-0.11	0.84	0.496	-1.919	0.993	-0.699	1.215
CT antigen genes	84944	MAEL|84944	-0.93	0.053	-2.812	-0.146	-0.647	0.306	-0.097	-0.743	0.62	-0.389	1.019	-1.981	-0.683	-0.512	-1.425	0.052	-0.721	-0.527	-0.719	-0.469	-1.693	-0.37	-2.333	0.152	0.503	-2.172	0.757	-1.276	0.015	-0.483	-2.026	-0.636	0.413	-0.376	-1.421	0.475	0.285	-2.62	1.253	-0.942	0.365	-1.682	-1.177	-0.351	-0.516	0.382	-0.569
CT antigen genes	166863	RBM46|166863	-2.086	-1.211	-2.01	0.223	-0.42	-1.346	-0.008	-0.535	-0.793	0.789	-0.892	0.454	-1.314	-0.373	-1.414	0.537	-1.492	0.155	-0.118	-0.408	-1.249	0.516	-1.636	0.598	0.581	-1.124	-0.003	-1.306	0.104	-2.047	-0.213	0.434	-1.83	-2.52	0.991	0.58	-0.588	1.442	0.738	-2.154	-1.721	-0.607	0.594	0.398	-1.061	-1.312	0.254
CT antigen genes	676	BRDT|676	-1.911	0.051	-0.811	0.493	1.487	0.748	0.621	-1.795	-0.172	-0.819	0.406	-2.01	-1.007	-0.285	-1.307	-0.003	-0.543	1.122	-0.8	-0.391	-1.836	-1.343	-1.343	-0.239	-0.292	0.651	0.982	0.622	0.083	-0.257	-2.014	-0.023	1.455	0.878	0.676	1.395	0.173	1.167	1.45	-1.443	0	1.198	-0.123	-1.358	-0.483	-0.73	0.887
CT antigen genes	53940	FTHL17|53940	-0.426	-0.393	0.777	0.677	0.246	-0.329	-1.752	0.091	0.011	1.025	1.461	-0.426	-0.957	-1.693	1.055	-1.47	-0.095	1.284	-1.603	0.49	-0.308	-0.862	-0.618	-0.187	1.417	1.044	1.442	-0.628	-0.48	0.473	0.665	-1.147	0.082	0.141	1.195	1.69	-0.636	-0.825	1.7	-1.379	-0.305	-0.308	1.771	-0.843	-1.597	0.376	0.139
CT antigen genes	4114	MAGEB3|4114	0.067	0.377	0.413	-1.101	-1.117	0.227	0.293	-1.578	0.297	-0.406	1.169	-0.159	-1.449	-1.328	-1.63	-0.841	-1.455	-2.342	0.078	-0.124	0.08	0.618	-0.713	1.713	-0.807	0.613	-1.209	0.802	-1.072	-0.307	0.289	0.679	0.792	-1.158	-0.906	0.056	-0.073	-0.666	0.633	0.105	-0.839	-2.234	-0.97	0.177	-0.374	-1.393	-0.595
CT antigen genes	441521	CT45A5|441521	-0.051	0.073	-1.807	0.712	0.603	0.598	0.446	-0.202	0.837	-1.618	0.689	-0.743	-0.374	-0.659	-1.316	-0.412	-0.22	-0.93	-2.608	-0.214	-0.437	-0.039	-1.447	0.812	-0.023	0.509	-2.977	-2.269	0.566	-0.776	-1.303	0.047	0.453	2.314	-0.01	0.409	1.653	-1.185	-0.839	1.54	-0.293	2.434	0.369	-1.683	-0.111	-1.496	-0.042
CT antigen genes	55511	SAGE1|55511	0.517	1.101	1.564	0.237	-1.135	1.305	-0.707	-0.49	-1.135	0.187	0.922	-1.07	-1.325	-1.975	-0.707	-0.207	-1.023	-1.765	-0.951	-1.581	-0.885	-0.08	-0.837	0	-0.2	0.87	1.601	0.995	0.918	-1.956	-0.369	-1.543	-0.152	2.296	0.791	-0.528	0	-0.242	0.377	-0.14	0.054	1.824	1.261	0.421	0.777	-0.18	0.081
CT antigen genes	54967	CXorf48|54967	-1.171	-0.145	-0.167	0.201	1.812	0.17	-0.115	0.678	0.819	0.08	0.276	-2.732	-0.771	-1.195	-2.067	0.653	-1.965	-1.235	-0.258	-1.868	-2.785	-1.323	-0.208	-0.995	-0.313	-2.089	-1.07	-0.815	0.184	-0.316	-0.404	0.455	0.673	0.847	-0.255	-0.09	0.502	0.666	-0.301	-0.88	-0.378	0.397	0.592	-0.306	0.613	-0.534	0.585
CT antigen genes	574	BAGE|574	-0.057	-1.503	0.293	-1.091	0.72	0.374	0.195	-0.745	0.719	0.83	0.015	-2.238	-0.34	-2.806	-0.164	-0.686	-0.455	-2.551	-0.216	-0.655	-0.6	0.124	-2.63	0.855	0.508	-0.317	0.443	-0.376	-1.084	-0.951	0.073	0.304	1.259	0.35	-0.779	-1.349	0.238	-0.414	1.042	-0.403	-0.147	-1.415	0.555	-0.91	0.222	-1.568	0.557
CT antigen genes	7179	TPTE|7179	-0.639	-2.224	-0.182	-0.934	0.935	0.138	0.242	-1.696	-0.046	-0.814	0.118	-2.007	-1.896	-0.711	-1.425	-0.354	-0.023	-0.974	-0.159	-1.015	-1.306	-1.585	-1.537	0.642	-0.139	0.527	0.369	-1.574	0.022	-2.586	-0.469	0.262	0.975	-0.469	-1.251	-0.258	0.324	-0.267	0.172	-1.582	-0.257	0.857	-0.281	0.026	0.518	-0.508	0.096
CT antigen genes	2543	GAGE1|2543	0.228	-0.093	-1.919	-0.433	1.227	0.295	-1.933	-1.607	0.585	0.95	0.679	-1.588	-0.44	-0.165	-0.693	0.558	-0.422	-0.336	-0.827	-1.711	-2.466	0.562	-1.295	0.671	0.65	-1.715	0.019	-0.406	0.273	-0.264	0.073	0.256	1.211	0.422	-0.268	-0.07	1.027	-0.985	-0.959	-1.921	-0.343	0.504	0.586	-1.203	-1.535	-2.113	0.956
CT antigen genes	8712	PAGE1|8712	-1.163	-1.269	-0.904	-0.265	0.499	0.86	-0.283	-0.257	-1.88	-1.626	0.463	-0.476	-1.784	-0.555	-0.18	-0.161	-2.301	-0.598	0.226	-3.056	-0.689	-0.165	0.23	1.777	-0.052	0.966	0.166	0.08	-1.326	-0.217	0.341	0.185	-1.923	0.227	0.307	1.085	-0.932	-0.764	0.799	-0.235	-0.781	0.579	-0.899	-1.772	0.478	-1.173	0.932
CT antigen genes	84677	DSCR8|84677	-0.992	-1.417	-0.92	-0.586	0.298	0.542	0.057	2.298	1.009	-1.601	-0.373	-2.162	-0.393	0.625	-1.019	-0.728	0.192	-1.126	1.492	1.237	-0.649	-1.114	-1.215	0.918	-0.448	1.429	0.213	-1.014	0.386	-0.319	-0.844	0.183	0.871	-0.647	-0.188	-0.777	1.673	0.431	0.261	-0.693	0.241	2.021	0.343	0.216	0.047	1.173	0.118
CT antigen genes	286499	FAM133A|286499	0.564	-0.729	0.892	0.582	-0.136	0.473	-1.261	-0.889	-0.977	-0.163	1.423	-1.296	0.229	-1.084	0.181	-0.89	0.43	-1.173	0.547	-0.818	-0.596	-0.23	0.37	0.194	1.202	1.052	-0.295	-0.993	0.698	-2.296	0.068	-0.047	0.345	-0.949	0.498	0.042	0.086	-0.774	0.22	-2.193	-0.722	2.319	0.886	-0.983	-0.852	-0.748	0.825
CT antigen genes	30848	CTAG2|30848	-0.494	-0.317	-0.369	-0.191	0.636	0.519	-0.133	1.806	-0.825	-0.5	1.297	-1.127	-0.091	3.41	-1.726	0.237	-1.042	-0.907	-0.42	-0.538	-0.549	0.132	0.19	0.757	1.403	0.254	0.004	-0.171	-0.333	0.288	-0.195	0.398	-0.256	-0.701	-0.823	-0.29	-1.099	-0.189	0.112	-0.893	0.043	4.095	-0.004	-0.659	-0.212	-0.052	0.165
CT antigen genes	4111	MAGEA12|4111	-0.624	-1.775	-0.082	0.042	-0.255	0.393	0.147	1.512	1.346	-0.533	0.173	-2.71	-2.343	1.088	-1.058	-0.102	-2.249	-1.153	-1.379	-0.77	0.614	-0.296	-0.589	-0.149	0.946	0.755	0.823	-3.513	-1.813	-1.423	-0.748	-0.445	0.069	0.101	0.519	-0.095	0.534	-1.176	0.838	-2.641	-0.441	1.556	-0.196	-0.223	0.264	0.549	-1.477
CT antigen genes	4102	MAGEA3|4102	-1.189	0.003	-0.771	-0.563	0.004	0.283	-0.502	2.185	2.236	-0.791	-0.05	-1.337	-1.318	1.89	-0.362	-1.665	0.311	-0.369	-0.265	-1.203	1.343	0.052	-1.089	0.091	-1.736	-0.035	1.169	-0.413	0.437	-1.131	0	-0.984	0.185	-0.872	-0.927	0.264	0.407	-0.627	0.311	-0.668	-0.655	2.14	0.613	-0.696	-1.134	1.7	0.539
CT antigen genes	4100	MAGEA1|4100	0.114	-0.186	-1.503	-0.794	-0.823	-1.048	0.277	0.571	1.064	0.731	1.001	-2.182	-2.337	0.296	-2.526	-0.491	-0.136	-1.645	-1.744	-0.172	-0.161	-1.593	-2.051	0.822	0.325	1.295	1.169	-0.125	-2.103	-1.582	-2.431	-0.685	0.241	-1.454	-1.027	0.525	0.615	-1.466	0.731	0.803	0.03	2.077	0.504	-1.302	-0.923	0.65	-0.359
CT antigen genes	9947	MAGEC1|9947	-1.529	-0.534	-1.91	-1.742	-0.029	0.055	0.605	0.679	-0.215	-0.442	0.686	-2.926	-0.472	-2.394	-0.553	-0.734	-2.188	-1.962	-0.002	-0.834	-2.229	-0.581	-0.36	-0.693	-0.897	1.289	0.106	-2.125	-0.465	-0.055	-0.451	1.311	0.768	0.112	-0.086	0.284	0.329	-1.495	1.985	-1.491	0.356	1.893	-0.732	0.116	-1.343	0.339	0.157
CT antigen genes	51438	MAGEC2|51438	-1.229	-0.015	-1.484	0.609	-1.447	-1.138	0.859	0.481	-0.714	-1.572	0.494	-0.507	-2.438	-0.599	-2.679	-2.099	0.625	-1.628	0.325	-0.339	-1.472	1.13	-1.552	0.699	-0.684	0.196	0.028	-1.449	0.305	-2.227	-0.461	0.116	-1.497	-0.347	-1.032	-0.201	0.446	-1.599	0.474	0.169	-0.482	1.185	0.509	-1.531	-1.739	-0.566	-2.036
CT antigen genes	4110	MAGEA11|4110	-2.043	-0.839	-1.577	0.533	-0.555	0.333	-1.83	1.117	1.52	0.34	-0.048	-0.259	-0.219	0.04	0.056	-0.542	-0.125	-0.722	-1.314	-2.099	0.633	-1.427	-1.248	-0.239	1.666	1.815	1.185	0.319	-0.927	-1.998	-1.641	-0.208	0.091	0.04	-0.01	2.278	0.165	0.076	0.302	0.508	-0.511	1.629	0.534	-0.172	-1.15	-1.019	0.395
CT antigen genes	168400	DDX53|168400	-0.591	0.088	0.586	-0.362	-0.281	1.035	0.563	-1.83	0.669	0.755	-1.328	-2.772	-1.772	-1.634	-0.596	0.262	-2.243	-1.546	-1.593	-0.515	-1.907	-0.333	-1.334	1.047	-0.906	0.37	-0.366	0.859	-1.829	-0.494	-0.141	-0.503	-0.302	0.065	-0.874	0.141	0.007	0.381	1.215	-0.647	-0.378	-0.991	0.39	-2.228	0.669	0.878	0.055
CT antigen genes	4112	MAGEB1|4112	-0.226	0.548	0.04	-1.272	1.062	-0.253	0.695	-2.063	0.404	-0.992	0.319	-0.423	-1.348	-3.07	-0.958	0.005	-3.134	-1.628	-0.662	-0.454	-1.619	-1.339	0.661	0.552	-0.023	-1.7	0.094	-0.447	-0.493	-0.591	0.235	0.135	0.857	0.219	-0.499	-0.723	0.485	-1.457	-2.094	-2.326	0.526	0.376	0.524	0.63	0.174	0.174	0.42
CT antigen genes	4113	MAGEB2|4113	-0.936	-1.145	-1.257	0.116	1.12	0.198	0.104	-1.926	0.399	-0.373	0.856	-1.558	-1.299	0.023	-3.107	-0.19	-1.286	-3.413	-0.338	-1.167	-1.543	-0.165	-1.009	1.204	-0.233	0.322	0.98	-1.789	-0.263	-2.594	-0.08	0.096	0.168	-0.443	0.255	-0.435	0.001	0.66	0.396	-1.131	0.101	0.852	0.094	-0.471	0.267	-1.298	-0.643
CT antigen genes	158809	MAGEB6|158809	-0.388	-0.09	0.143	-1.489	0.887	0.115	0.208	-0.136	-1.639	0.666	0.705	-2.23	-1.667	-2.12	-1.938	0.097	-1.616	-1.815	-1.111	-2.049	0.026	-1.361	-1.258	1.119	0.702	-1.464	-1.767	0.093	0.435	-0.714	0.533	-0.422	0.67	-2.421	0.787	0.32	0.3	0.436	0.741	-1.903	0.028	0.159	-0.077	0.336	1.18	-1.19	-0.035
CT antigen genes	90737	PAGE5|90737	-1.255	-0.076	-0.772	-0.208	2.895	1.478	0.741	-0.335	-0.27	-1.169	-0.335	0.416	-0.646	-0.983	-0.862	-0.538	-0.045	-1.074	-0.83	0.639	-1.098	1.641	-0.322	0.492	0.165	0.085	-0.472	0.13	-1.267	-1.67	-0.312	-0.382	-0.077	-0.396	0.159	0.082	0.667	1.073	-0.032	-1.207	-0.035	3.35	0.403	-0.116	-0.062	0.492	0.114
CT antigen genes	4109	MAGEA10|4109	-1.622	-0.901	-0.752	0.023	1.888	-0.55	1.344	-0.503	0.817	-0.921	-0.143	-1.424	-1.372	-0.07	-0.534	0.029	-0.847	-0.83	-0.112	-1.684	-0.813	0.02	-0.21	0.112	0.855	0.051	0.746	0.119	-0.548	-1.904	-0.288	0.048	0.027	-0.011	-0.482	-0.148	0.27	-0.244	-0.188	-0.81	0.345	2.797	0.337	-0.042	-0.15	0.621	-0.394
CT antigen genes	4104	MAGEA5|4104	-1.675	-0.151	0.357	-0.73	-0.13	0.495	-0.197	0.344	1.214	0.318	1.018	-0.996	-0.103	-0.164	-2.15	-0.36	0.349	-0.686	0.226	0.006	-1.337	0.085	0.156	0.395	0.698	0.876	-1.752	0.361	-2.468	-0.685	0.376	-0.031	1.004	0.304	0.592	0.025	0.856	1.294	-1.219	0.109	-1.683	-0.191	-1.508	0.175	-1.303	0.695	0.338
CT antigen genes	4103	MAGEA4|4103	-1.985	0.243	-1.007	0.35	-0.603	-1.438	-1.279	0.695	-1.371	0.788	0.217	-0.786	0.164	-2.105	-0.393	-1.645	-0.276	-0.161	-0.278	-0.419	-1.954	-0.056	0.213	-0.621	-1.571	0.841	-0.979	-2.045	-0.594	-0.063	-0.532	-0.246	0.039	-0.295	-1.409	1.096	0.107	-1.543	0.553	-2.019	-0.289	1.676	-0.931	-1.352	-0.038	-0.12	0.428
CT antigen genes	139135	PASD1|139135	-0.486	-1.946	-0.37	0.078	0.983	-0.002	-0.437	-1.254	0.156	-3.393	-1.258	-1.646	-1.159	-2.009	-1.892	0.767	-0.205	-0.319	-0.846	-2.423	-2.158	-0.371	-2.756	-1.946	1.001	0.297	0.966	-0.091	-0.487	-2.433	-0.402	-1.187	0.295	0.341	0.21	1.34	-0.422	0.154	-0.546	-1.755	0.093	0.537	-0.001	0	0.083	0.006	0.423
CT antigen genes	158521	FMR1NB|158521	-0.238	-2.281	-0.029	-0.332	0.865	-0.962	0.393	-1.585	0.401	-0.214	0.381	-1.075	-1.222	-1.95	-0.611	-0.1	-0.332	-0.707	-0.554	-2.919	-0.79	-0.055	0.147	0.791	0.635	0.122	0.232	0.215	-1.575	-0.638	-0.023	-1.523	0.02	0.077	-2.139	0.239	0.375	0.479	-0.241	-0.774	0	0.525	-1.912	-2.625	0.317	-3.235	-1.613
CT antigen genes	6756	SSX1|6756	-0.574	-1.256	0.733	0.003	-0.53	-2.139	1.232	0.535	-0.596	0.726	1.4	-1.451	0.986	0.787	-0.681	0.659	-0.924	0.177	-1.695	-1.574	0.619	0.603	0.652	2.165	1.975	1.414	-0.439	1.337	-0.078	-1.047	0.139	-1.49	1.607	-0.617	1.373	-0.139	0.885	1.017	1.233	-0.109	-0.349	2.399	0.469	-0.295	-0.526	1.043	0.867
CT antigen genes	6757	SSX2|6757	-0.943	-0.084	-0.306	0.19	-1.7	-2.308	0.726	0.272	0.682	-1.991	-1.537	-1.977	-2.854	-0.287	-1.871	0.115	-2.251	-1.302	-0.015	-2.408	0.486	-1.533	-0.411	1.222	-0.819	0.246	0.147	-1.15	-0.288	-1.777	-1.68	0.195	0.873	0.813	0.008	-0.285	1.156	-1.627	-1.97	-1.258	0.189	0.883	-1.428	-1.779	1.141	0.227	0.665
CT antigen genes	10214	SSX3|10214	-0.514	-0.935	-1.226	0.762	0.929	-1.199	0.495	-1.486	0.92	0.739	0.275	-1.922	-1.851	-0.591	-0.642	-0.321	-1.47	-1.671	-1.407	-1.726	-1.24	-0.956	-1.062	1.091	1.117	-0.459	0.832	0.096	-0.939	-1.811	-0.384	-0.508	0.673	0.737	0.544	0.38	0.291	-1.38	0.385	-0.202	0.664	3.529	-0.734	-1.286	-1.315	-1.198	0.296
CT antigen genes	6758	SSX5|6758	-1.342	-0.872	0.41	1.638	0.731	0.293	-0.297	-0.49	-0.791	-1.296	-1.013	-1.861	-1.319	-0.612	-1.592	-1.035	-0.066	-1.495	-0.92	-0.264	-0.524	-0.173	-1.222	1.012	-0.208	-0.167	0.072	2.087	-0.894	-0.725	0	-0.904	-0.829	0.063	-0.153	0.491	1.079	0.07	-0.328	-1.087	0.165	4.119	2.565	-0.683	0.524	1.521	-0.683
CT antigen genes	4107	MAGEA8|4107	-0.689	0.364	0.015	-1.923	0.879	0.35	0.525	0.735	0.026	-1.964	0.896	-2.645	-2.235	-1.237	-2.082	-0.1	0.001	-0.493	-1.282	-0.186	-0.407	-1.77	-1.246	0.235	-0.14	-1.062	-1.77	-0.677	-0.74	-2.676	-1.473	-0.386	0.662	-1.139	-1.81	0.447	0.151	-0.875	0.874	-0.988	-0.007	0.722	-0.356	-0.08	0.733	-1.624	0.482
CT antigen genes	51213	LUZP4|51213	-1.26	-1.692	-0.472	-1.172	-1.109	-1.676	1.017	-0.379	-1.26	-0.556	-1.28	-1.144	-0.963	-1.615	-0.195	0.845	-1.153	-1.436	-1.012	-0.268	-0.46	-1.102	0.778	-0.62	-0.29	-0.055	-0.488	-0.812	-0.87	-0.865	-0.158	-1.493	0.609	-0.287	0.631	-0.203	0.522	1.735	-0.714	-1.835	-1.12	-1.368	-0.874	0.862	-1.648	0.436	-0.95
CT antigen genes	139081	MAGEC3|139081	-1.39	-0.747	-0.841	1.253	0.872	-0.601	1.34	-0.77	1.074	0.512	0.465	-1.689	0.239	0.75	0.573	0.537	-0.4	0.324	0.471	0.596	-1.284	0.607	1.575	1.626	-0.807	-0.537	1.589	-0.061	-1.047	-1.158	-0.554	1.128	-0.297	1.126	-1.819	0.493	-0.581	0.646	1.373	0.2	0.622	-0.542	1.335	-1.389	-0.133	0.643	1.276
CT antigen genes	64663	SPANXC|64663	-1.304	0.504	0.037	0.473	-0.193	0.73	0.594	-4.129	0.836	-0.434	0.732	-3.04	-0.225	-0.503	-0.822	0.372	-0.695	-1.107	-0.689	-0.807	-0.063	0.069	-1.506	0.921	-1.548	0.998	0.962	-1.865	0.71	-0.552	-0.102	-0.551	0.65	0.047	-0.653	0.172	-0.122	0.967	1.103	-1.76	0.362	-1.038	1.168	-2.923	0.877	0.193	0.023
CT antigen genes	147945	NLRP4|147945	-0.166	0.031	0.456	-0.541	1.123	1.353	0.632	-0.858	0.789	0.155	0.81	-1.423	-0.879	-0.278	-0.524	-0.755	-1.548	-0.465	-0.995	-0.517	-1.081	-1.285	0.431	0.314	-0.613	1.351	0.359	0.346	-0.902	-0.733	-1.41	-0.385	1.205	-0.93	-0.663	0.404	0.158	0.824	0.247	-0.34	0.609	-0.18	0.857	-1.006	-0.384	-0.564	1.432
CT antigen genes	317754	POTED|317754	-0.112	-0.085	-1.393	-0.402	0.579	-2.515	-0.687	-1.065	0.979	0.487	-0.151	-0.453	0.36	-1.696	0.548	-0.57	-1.599	-2.871	-0.455	-0.786	-0.544	-0.285	-1.969	-0.648	-0.824	1.162	-0.046	-1.969	-0.068	-2.682	-1.767	-1.912	-0.102	0.103	0.023	0.77	0.563	1.136	0.584	-1.953	1.057	0.68	0.287	0.36	-0.88	0.557	0.782
CT antigen genes	7258	TSPY1|7258	-0.551	-0.309	-0.516	-0.587	2.496	0.484	-0.177	-1.168	1.629	0.017	0.422	-1.727	-0.703	0.179	-1.245	0.702	-0.818	-1.118	1.047	-1.022	-0.247	0.602	-1.33	0.399	1.72	0.279	-0.325	-0.282	0.394	-1.229	0.18	-0.629	1.755	-0.022	-0.574	-0.759	0.518	1.07	0.256	-0.592	-0.531	-0.85	0.197	-0.364	-0.214	-0.542	0.596
CT antigen genes	9506	PAGE4|9506	-1.449	-1.46	-0.33	-4.069	0.86	-0.52	-0.036	-0.756	0.288	-0.236	-0.498	-0.861	-1.094	0.075	-0.821	-0.307	-0.501	-0.283	-0.125	-1.207	-0.057	-0.894	0.217	-0.954	0.466	0.171	1.144	-0.462	0.059	-1.756	-0.79	-0.179	-1.092	0.463	-0.248	1.578	0.081	-0.539	0.623	-1.299	0.864	-1.231	-0.078	-0.992	1.345	-0.33	1.188
CT antigen genes	139538	VENTXP1|139538	-1.019	0.056	-1.743	0.028	1.496	0.13	0.209	-0.511	0.307	0.142	0.079	-0.63	-0.495	-0.92	-0.554	0.335	-2.184	-1.08	-0.835	-2.033	-1.217	-1.245	0.667	0.287	-0.342	0.129	0.18	-0.815	0.097	-1.444	-0.722	-0.412	0.498	0.318	0.437	-1.049	-0.024	-2.184	0.379	-0.846	-0.361	1.044	0.006	0.334	-0.37	-0.497	0.899
CT antigen genes	170626	XAGE3|170626	-0.786	-0.535	-0.23	0.319	1.388	-1.701	0.967	0.551	-1.216	-1.121	0.332	-1.488	0.407	-0.393	-0.026	0.953	0.482	-0.202	0.204	-1.784	-0.399	-2.2	0.468	-0.406	-0.575	-0.551	0.957	0.351	0.774	-0.541	-0.236	-1.722	-1.341	0.177	-0.559	0.49	-0.575	0.891	0.625	0.12	-0.422	0.512	0.64	-0.516	-0.496	-1.059	-0.797
CT antigen genes	133482	SLCO6A1|133482	-1.144	0.404	-0.086	-0.463	0.517	-0.075	-1.939	-1.429	0.242	-0.97	0.408	-1.293	-1.322	-0.24	-1.528	0.18	-0.282	-1.11	0.135	-1.39	-2.179	-0.503	-0.06	0.708	0.092	1.411	-0.114	-3.383	-0.806	-1.543	-1.347	0.522	1.468	0.511	-0.528	0.172	0.308	-1.635	0.277	-0.024	0.439	0.687	-0.659	-1.63	-1.883	1.595	0.249
CT antigen genes	56163	RNF17|56163	-0.843	0.77	-0.862	0.229	0.733	1.074	0.688	-1.598	0.393	0.188	1.235	-1.895	0.116	-1.582	-1.79	-0.463	-1.592	-1.147	-0.915	-1.574	0.44	0.448	-0.491	0.506	0.387	0.464	1.307	0.645	0.386	-1.767	-1.897	0.035	-0.692	-1.229	0.826	0.151	0.024	-0.565	0.361	-1.341	-0.449	0.771	1.328	-2.103	-1.3	1.185	-1.808
CT antigen genes	11086	ADAM29|11086	-1.872	0.805	0.005	-0.652	1.132	0.932	-2.008	-0.502	-0.115	0.197	0.775	-1.173	-0.102	0.336	-0.696	-0.742	-0.079	-1.128	0.495	0.56	0.3	0.123	-0.082	-0.233	0.793	0.389	-1.102	-1.559	-1.934	-0.949	-0.666	-0.093	0.62	0.252	0.439	0.356	-2.682	1.037	0.016	-0.3	-0.664	-0.627	-1.529	-1.204	-1.824	0.643	-1.308
CT antigen genes	1496	CTNNA2|1496	-0.632	0.828	0.135	-0.464	1.089	-0.366	-0.075	-0.39	0.558	0.966	0.624	-2.292	-0.355	-2.424	-0.647	-0.379	-1.483	-0.828	-0.436	-1.545	-2.246	0.213	-0.209	-1.777	0.412	0.837	0.365	-0.662	0.884	-2.584	-1.033	0.902	-0.286	-0.103	0.083	-0.041	0.842	-0.167	1.05	0.109	0.465	0.256	-1.042	0.68	1.281	1.861	-0.139
CT antigen genes	8715	NOL4|8715	-0.125	-2.496	-1.923	-0.142	1.257	-1.458	-1.888	-2.336	-1.429	-2.199	-1.779	-2.373	0.326	-0.006	-0.199	-1.639	-0.444	-2.049	0.159	-0.048	-1.595	0.812	0.125	-1.078	0.098	0.647	-2.23	-0.21	-2.113	-1.584	0.231	0.704	-0.603	0.781	-1.485	0.41	0.25	1.187	-1.143	-1.786	-0.026	0.231	0.078	0.565	0.595	0.057	0.328
CT antigen genes	23671	TMEFF2|23671	-0.599	0.112	0.281	0.615	1.455	0.444	-0.607	-2.932	0.842	-0.516	0.53	-0.585	-0.871	-0.075	-0.909	0.673	-0.124	0.005	0.116	-0.555	-0.94	0.261	-1.278	-1.608	0.124	-0.615	0.278	-1.423	0.023	-0.496	-0.166	0.227	-0.293	-0.095	-1.184	-1	-1.41	0.577	0.437	-1.867	-0.507	-0.904	-0.567	-0.142	0.686	0.603	-1.332
CT antigen genes	152404	IGSF11|152404	-0.376	-0.92	-0.403	-1.086	-0.134	-0.479	-0.514	-1.324	-1.012	-0.952	0.925	-1.288	-1.613	-2.122	0.101	-0.559	-1.135	-1.939	1.306	0.882	-1.186	0.341	-0.096	0.929	-0.59	0.865	0.269	-1.487	-1.296	-0.976	-0.551	1.536	0.42	0.231	-1.286	-0.144	0.151	-0.378	0.369	-0.631	-1.49	0.453	-1.977	0.991	-1.394	-0.114	0.166
CT antigen genes	6785	ELOVL4|6785	-0.404	-0.339	0.062	0.542	-0.324	-2.176	0.758	-1.5	-0.116	-1.299	-2.269	-0.741	-0.511	-0.431	-0.567	-0.418	-2.057	-0.317	-0.07	0.197	-1.631	-1.958	-1.365	0.684	-1.562	-1.545	0.441	-2.03	-0.267	0.301	-1.985	0.286	0.895	-0.684	-1.01	0.627	0.23	-1.243	-1.037	-1.445	0.282	1.176	-0.55	-0.533	0	-0.725	0.355
CT antigen genes	8577	TMEFF1|8577	0.549	-1.214	-0.004	-0.918	-0.126	-0.322	0.341	-0.691	0.675	-0.414	0.101	-0.824	-2.058	0.004	-1.276	-2.501	0.036	-0.009	-0.841	-0.938	-1.211	-0.206	-0.177	-0.249	0.366	-1.343	-0.255	0.351	-0.387	-0.331	-1.708	1.627	-0.738	0.512	-3.346	0.911	-0.843	-1.213	-0.159	-0.023	1.384	1.363	-0.333	0.728	-1.913	-1.02	-0.846
CT antigen genes	56154	TEX15|56154	-0.41	0.277	-1.315	0.148	0.748	0.274	0.399	-2.474	0.479	-0.353	0.545	-0.773	-0.563	-0.331	-1.843	-1.517	-1.911	-1.911	-0.643	-1.399	-0.159	-0.494	-1.206	0.441	-0.421	0.857	-1.326	-0.315	-0.147	0.178	-0.06	0.16	0.625	-0.697	0.19	0.219	-1.528	-1.475	2.887	0.886	-1.051	-0.049	-0.145	0.108	-1.924	-0.574	-0.073
CT antigen genes	66000	TMEM108|66000	-0.266	-1.99	-0.308	-1.082	-1.093	-0.965	-0.941	-1.906	1.089	-1.289	-0.46	-1.117	-0.15	-1.134	-0.663	0.082	-2.361	-1.101	-0.346	0.247	0.213	-1.908	0.89	0.577	0.431	-0.2	-0.137	-1.637	0.538	-0.435	-0.308	-2.096	-1.584	-2.071	0.719	0.53	0.693	-0.001	-1.299	-0.474	-0.843	0.461	-0.638	0.119	0.326	-2.034	-1.305
CT antigen genes	6847	SYCP1|6847	-0.615	-0.152	0.031	-1.247	0.959	-3.304	0.09	-0.798	0.468	-0.02	0.255	-1.082	-0.732	-1.362	-2.577	0.142	-0.865	-0.704	-0.501	-0.615	-1.041	-0.831	0.403	0.84	-0.753	-0.036	0.436	-1.273	-1.232	-1.032	-0.96	0.016	0.286	-0.484	0.021	0.192	0.199	-1.575	1.119	-0.923	-0.811	0.247	0.248	-0.676	-0.475	0.078	0.19
CT antigen genes	54457	TAF7L|54457	1.257	0.571	-2.05	0.275	-0.868	-0.418	0.814	0.217	1.221	0.372	1.181	-1.15	-0.245	0.664	0.333	0.679	0.36	0.458	-1.955	-1.313	-2.161	-1.018	1.014	0.008	1.179	1.611	-0.509	-1.594	0.677	0.331	-2.217	0.169	-1.295	-0.04	1.516	-0.161	1.021	1.25	1.457	-1.643	-1.337	0.316	1.024	-2.421	1.062	-2.038	0.665
CT antigen genes	8852	AKAP4|8852	-2.04	-2.019	0.167	-0.308	-0.693	0.358	-0.754	0.725	0.575	-0.851	1.207	0.445	-1.141	1.52	0.236	0.231	0.267	-0.105	-1.561	-2.347	-2.068	0.045	-1.147	-0.876	0.4	0.924	0.744	0.352	0.846	-0.017	-2.363	0.423	0.499	0.475	0.685	0.517	0.971	1.164	0.982	-0.129	0.446	0.126	0.974	-2.18	0.68	0.121	0.215
CT antigen genes	285782	CAGE1|285782	-1.109	-1.061	-0.628	-0.817	1.488	-1.109	0.827	1.646	1.608	0.295	0.646	0.462	-0.628	-0.628	-1.307	0.486	0.385	1.005	-1.347	0.156	0.112	0.961	-0.925	0.831	1.507	-0.201	-0.287	-1.109	-0.789	-2.131	0.076	-1.042	-0.363	0.956	-0.74	0.812	0	-0.24	-1.233	-1.132	-0.245	1.408	1.646	-0.936	-1.224	1.63	0.496
CT antigen genes	4115	MAGEB4|4115	-0.687	-0.768	-1.511	0.214	-1.112	0.214	-1.357	-1.763	-1.3	0.275	-1.265	-3.069	-3.361	0.434	-0.824	-0.425	-1.982	-2.744	-1.059	-0.162	-1.159	-1.814	-1.385	-0.578	0.62	0.878	0.485	0.098	0.424	-0.456	0.297	-0.089	-0.432	0.263	-0.048	-1.055	-0.391	0.589	-1.606	-1.517	-0.749	0.693	0.113	-2.233	0.447	-0.166	0.326
CT antigen genes	165721	DNAJB8|165721	-0.909	0.152	0.053	-0.544	1.283	1.189	-1.128	-2.12	0.782	-1.594	0.715	-1.344	-1.425	-0.372	-0.505	-0.618	-0.473	-3.213	0.555	0.31	-0.177	-0.458	-0.946	-0.155	0.931	-1.866	-1.22	0.561	-0.503	-0.773	0.403	0.002	0.353	-0.351	0.422	-2.404	-1.193	0.946	-2.034	-0.571	0.313	0.656	-0.256	-1.418	-0.77	0.566	-1.061
CT antigen genes	23626	SPO11|23626	-2.635	-0.731	0.652	0.222	0.643	-0.99	-0.153	0.167	0.701	0.625	-0.291	-1.88	-1.209	-0.669	-0.56	-0.651	-0.942	-3.757	-0.957	-0.148	-1.477	0.378	0.854	-1.067	0.372	-0.405	0.389	0.018	0.652	-1.381	-0.872	-0.168	0.047	0.671	0.337	-0.629	0.804	0.905	0.636	-0.94	-0.238	0.44	0.133	-0.423	-0.757	0.25	0.346
CT antigen genes	220047	CCDC83|220047	-2.17	-0.117	0.198	-1.298	2.214	-1.225	0.774	0	-1.324	0.421	1.134	-1.604	-0.759	-1.324	-1.533	0.871	-1.928	-1.84	1.287	1.655	0.549	-0.843	0.481	1.359	-0.973	0.735	-0.537	-1.126	1.032	-1.613	0.026	0.224	1.043	-0.378	1.216	0.846	1.307	1.266	1.281	0.825	-0.493	0.044	0.048	-1.776	0.349	-0.898	0.341
CT antigen genes	146852	ODF4|146852	0.241	0.205	-0.066	-0.092	0.978	-0.764	-0.181	-0.052	0.914	-0.505	0.486	0.11	-2.128	0.531	-2.223	-2.348	-0.458	-0.049	-1.909	-0.695	-0.025	-0.052	0.568	-1.267	-0.029	-1.066	-0.503	-0.422	-1.222	-3.467	0.658	-0.479	0.693	0.411	-0.445	-0.434	-0.212	0.767	-0.555	-0.495	-0.22	-2.029	0.84	0.022	0.388	-0.172	-2.861
CT antigen genes	149992	C21orf99|149992	-1.779	0.106	-0.794	0.306	0.05	0.2	0.072	-1.433	-0.001	-0.664	0.719	-1.513	-2.648	-3.759	-2.612	0.333	-0.258	-1.606	-0.661	-1.059	-1.506	-0.319	-2.072	0.763	-0.962	1.313	-0.263	-2.172	-0.792	-2.224	-0.141	-0.425	0.075	-0.591	-0.088	0.351	-0.179	-0.176	-0.271	-1.207	0	0.368	0.292	0.32	0.735	0.939	0.215
CT antigen genes	158506	ZNF645|158506	-0.733	0.156	-0.365	-0.566	0.86	-0.173	0.474	-0.556	0.532	-0.297	0.261	-1.581	-0.623	-1.104	-0.893	-0.107	-0.376	-1.439	-1.555	-0.907	-0.8	-0.139	-1.007	-0.128	-0.186	-0.294	-0.102	0.554	-0.3	-1.681	-3.013	-0.224	0.308	0.525	0.348	0.439	0.138	0	-2.34	-2.928	-0.5	-0.38	0.781	-0.966	0.5	-3.443	0.104
CT antigen genes	203074	PRSS55|203074	-1.968	-0.254	-1.396	-0.079	-0.051	0.099	-0.41	0.094	-0.178	0.116	-1.417	-0.612	-0.754	-0.737	-3.367	0.611	-1.147	-0.647	-0.266	-0.407	-0.966	-0.467	0.936	0.006	-2.603	-0.827	-0.122	-0.662	0.456	-0.326	0.064	-0.342	0.954	0.204	0.034	-0.718	0.226	0.605	-0.7	-1.153	0.639	-2.134	-0.378	0.333	-0.272	-0.891	0.605
CT antigen genes	283471	TMPRSS12|283471	-2.234	0.103	0.753	-0.428	-0.387	0.221	-0.039	0.097	0.885	-1.457	0.099	-0.68	-1.578	-0.193	-3.014	0.165	-0.46	-3.542	-0.873	-2.52	-0.24	0.195	0.069	0.999	-0.42	0.995	0.256	-2.068	0.397	-1.726	0.194	0.412	1.089	-0.357	0.749	-1.268	0.547	-0.099	0.23	-0.28	0.801	0.505	0.106	-0.09	-0.164	-1.804	0.048
CT antigen genes	51270	TFDP3|51270	0.217	1.671	-0.382	-0.995	1.648	-0.751	-1.011	-0.269	-0.089	-0.639	-0.415	-0.228	-1.06	-0.207	-0.201	-1.031	-1.522	-1.632	-1.176	0.179	-1.829	-0.7	-0.628	1.5	-0.647	1.507	-0.707	0.774	0.895	0.52	-1.121	-0.823	-0.526	-0.58	0.122	0.832	1.029	-0.166	0.875	-1.4	-0.394	0.447	-0.324	-0.117	0.827	0.055	1.896
CT antigen genes	4956	ODF1|4956	-0.736	-0.792	0.582	-1.62	1.104	-0.86	0.353	0.017	-1.078	-0.104	0.743	-1.145	-0.856	-2.87	-0.646	0.416	0.147	-0.278	-0.029	-0.359	-0.592	-0.727	-0.102	0.905	0.318	1.307	-0.135	-0.458	0.212	-1.132	-0.978	0.392	-1.197	-0.598	0.691	0.453	0.583	1.265	-0.203	-0.175	-0.763	-0.05	0.103	-2.073	0.194	0.285	0.619
CT antigen genes	5619	PRM1|5619	-0.24	-1.348	-0.949	0.258	0.372	0.852	0.882	0.272	-1.259	0.563	0.699	-1.011	-2.071	-2.784	-0.359	0.643	-1.208	-1.794	-0.283	-1.373	-1.518	-0.205	-0.197	0.352	-0.586	1.266	0.674	-0.273	-0.153	-1.126	-2.383	-2.009	0.371	0.656	-1.324	0.781	-1.459	-1.332	0.295	-2.494	-0.955	1.392	1.649	0.846	-0.454	-0.633	-1.373
CT antigen genes	5620	PRM2|5620	-1.416	-0.893	-0.59	-1.36	1.014	-0.252	0.85	0.221	0.339	0.714	0.846	-0.087	0.025	1.232	0.025	2.279	-0.575	-0.369	1.332	-1.505	-0.945	-0.834	0.443	2.406	0.985	1.193	0.789	0.1	0.604	0.297	-1.006	-0.661	2.341	-0.267	0.373	-0.924	-0.759	2.676	-0.092	-0.528	0.673	-1.2	0.686	0.135	-0.412	0.643	1.532
CT antigen genes	113746	ODF3|113746	-0.765	-1.532	-0.171	0.288	1.164	0.582	1.548	-0.905	-0.09	0.764	-0.306	-1.958	-2.367	-0.316	-0.334	-0.166	-0.615	-1.845	-1.379	-0.929	-0.067	-1.392	-0.773	-0.663	0.304	0.553	-0.309	-1.075	-1.727	-0.046	-1.283	-0.461	1.421	-0.828	0.466	-0.266	-1.77	1.439	0.616	-1.812	-1.392	-0.512	0.139	1.08	1.102	0.066	0.848
CT antigen genes	83983	TSSK6|83983	-1.143	-0.829	0.162	0.852	-0.823	1.557	-0.609	-1.541	0.507	-0.984	0.13	-1.617	-1.905	-0.799	-1.437	-1.229	-1.851	-0.543	0.601	-0.359	-1.161	0.192	-1.089	-0.413	-0.648	0.564	0.134	-0.353	-1.089	-1.743	1.405	0.347	-0.033	-1.029	-0.853	0	-1.159	1.105	-0.642	-1.125	-0.355	-0.014	1.939	1.354	1.206	-0.493	-0.397
CT antigen genes	150280	HORMAD2|150280	-0.046	0.203	-0.675	-0.023	0.747	0.501	-1.511	0.085	0.602	-0.094	0.663	-0.511	-0.053	-0.936	-2.28	0.721	0.048	-2.07	-2.321	-1.479	-0.183	-1.175	0.261	-0.21	-1.747	-1.408	0.154	0.512	-1.536	-2.068	-2.118	1.116	-0.951	0.477	-0.552	0.563	0.56	-0.731	-1.652	-2.64	-1.02	0.721	0.239	-0.159	0.445	-0.623	0.492
CT antigen genes	170302	ARX|170302	0.238	-0.319	-0.503	-0.079	-0.91	0.875	0.567	-2.178	0.544	-0.705	1.28	-0.977	-1.5	-1.72	-1.93	0.49	-1.296	1.166	1.681	0.203	-0.244	-0.603	-0.615	0.534	-0.874	-0.573	-0.603	-0.104	0.332	-0.795	0.402	-1.806	0.803	-1.869	0.122	0.325	0.882	0.372	-0.491	0.049	-0.503	-0.192	-0.113	0.074	-0.686	0.274	0.552
CT antigen genes	53336	CPXCR1|53336	-2.008	0.733	0.88	0.799	0.688	0.103	0.77	-1.294	0.319	0.11	-1.363	-1.016	-0.46	0.617	-0.366	-1.428	-1.963	-0.39	0.247	-1.709	0.006	-2.973	0.649	0.436	0.775	-1.247	0.812	-1.229	0.564	-1.614	0.29	-1.831	-0.712	-0.014	-1.102	-0.734	0.967	-1.447	0.863	-2.492	0.488	-1.293	0.118	-0.255	0.989	-1.893	0.293
CT antigen genes	3598	IL13RA2|3598	-0.419	0.64	0.383	0.339	0.133	-0.15	-0.309	0.036	-0.6	-0.382	-1.945	0.353	-0.796	-0.001	0.627	-0.015	-2.86	-2.764	-0.638	-1.676	-0.275	-1.592	1.239	0.825	0.763	0.093	0.387	-1.051	-0.131	0.892	-1.428	-1.778	0.219	-0.296	0.202	-1.166	-0.527	0.459	0.287	-1.074	-0.56	2.754	-1.522	0.105	0.205	0.089	0.156
CT antigen genes	10566	AKAP3|10566	-0.317	2.005	-0.824	0.565	0.076	-1.247	-0.637	0.408	1.449	-2.64	-1.145	-1.457	-0.546	0.161	-0.226	0.917	-0.358	0.286	-0.779	-0.123	-0.789	-0.846	0.091	0.78	0.437	-0.667	0.902	1.529	-0.022	-0.992	-0.47	0.022	0.025	-0.387	-0.146	-0.47	0.007	0.895	-1.313	-0.517	0.361	-1.484	1.056	-0.567	2.139	-0.542	0.137
CT antigen genes	256309	CCDC110|256309	-0.695	-0.799	0.491	0.325	1.22	0.595	-0.808	-0.533	0.98	0.048	0.238	-0.288	-0.125	-2.463	-2.25	1.119	-2.557	-0.895	0.514	0.119	0.076	0.488	-1.095	0.112	-0.006	1.078	0.247	-1.109	0.373	-0.181	0.067	1.059	0.067	-0.204	0.242	0.325	0.723	0.249	0.39	-1.56	0.417	1.316	-1.422	0.315	-1.53	0.356	0.808
CT antigen genes	7180	CRISP2|7180	-0.13	-1.583	-1.733	-0.223	-0.893	0.955	-0.276	0.192	1.897	-1.124	-1.501	0.359	-1.166	0.447	0.147	0.314	-0.148	-1.227	-1.731	-0.551	2.567	-1.4	-0.901	-0.737	0.437	-0.944	0.281	0.649	-0.944	0.065	-1.313	-0.079	-0.513	0.053	-1.477	-1.096	-1.643	1.108	0.604	-0.285	-0.955	0.839	0.888	-0.353	-0.972	-1.764	0.673
CT antigen genes	80125	CCDC33|80125	-0.642	0.955	0.614	-2.313	0.15	-0.586	0.152	-0.139	-1.682	-2.392	0.572	-0.782	-0.481	-3.477	-1.552	1.205	-0.77	-1.053	-0.603	-0.253	-2.175	1.223	-0.182	0.928	0.183	1.374	0.856	-0.625	0.125	-1.027	-0.047	-2.225	0.533	0.109	-3.648	0.21	0.282	-2.912	-0.058	-4.11	0.378	0.949	-0.662	-0.009	-0.455	-0.52	1.111
CT antigen genes	57119	SPINLW1|57119	-0.514	0.211	0.359	-0.245	0.723	-0.469	0.349	0.486	-0.431	-0.41	0.194	-0.984	-0.863	-2.221	-1.832	-2.598	0.018	-2.942	-1.366	-0.41	-0.436	-0.085	0.318	0.412	0.718	1.166	-0.007	0.052	0.379	-0.031	-1.367	-0.042	0.416	0.617	-0.637	1.637	1.39	-0.619	0.288	-0.558	-1.473	-1.955	0.053	-0.034	0.535	0.406	0.24
CT antigen genes	339416	ANKRD45|339416	-1.268	-0.171	-0.923	-0.959	-0.664	0.504	-1.337	-0.613	-0.321	-0.066	0.565	-0.746	1.652	-0.732	0.511	-1.367	-1.697	-0.797	0.189	0.271	0.686	1.215	0.483	-1.087	1.401	-1.033	0.383	1.009	0.746	-2.516	-1.556	-0.438	-0.958	0.382	-2.224	0.051	0.505	0.092	0.079	0.52	-1.062	1.231	-1.117	-0.285	0.779	-0.674	1.596
CT antigen genes	219681	ARMC3|219681	0.277	-0.794	-0.501	-0.373	-0.14	0.053	0.502	-1.636	1.241	0.497	-1.515	0.168	-0.621	-1.352	-2.15	-1.503	-1.783	0.031	-1.073	0.206	-1.468	0.343	-0.544	-0.999	0.802	0.423	0.469	0.028	-1.16	-1.706	-1.544	0.08	0.255	-0.232	0.782	-2.438	0.258	0.453	0.012	0.194	0.379	0.4	0.064	0.562	1.192	0.346	1.942
CT antigen genes	26206	SPAG8|26206	-0.658	-1.463	0.11	-0.15	-0.783	1.3	0.121	-0.369	-1.029	-0.17	2.401	-1.233	-0.658	1.215	0.63	0.311	-0.382	1.15	-0.065	-0.62	1.252	-0.783	-0.111	0.077	1.947	1.823	-0.154	1.518	1.955	0.859	-0.751	-1.348	1.453	0.882	0.591	-1.336	1.217	1.412	1.321	0.163	-0.787	-1.268	-0.763	1.37	0.659	-0.782	2.024
CT antigen genes	79925	SPEF2|79925	-0.265	-2.041	-0.176	-0.206	1.058	0.039	0.877	-1.645	-0.816	-0.204	0.64	-3.034	0.168	-1.518	-1.816	0.428	-0.255	1.174	-2.351	-0.715	-2.602	-0.141	-0.991	-1.342	-0.492	1.398	-0.468	-3.173	0.109	-0.187	-2.025	-0.101	-0.648	-0.208	0.855	-1.379	-1.204	0.548	-1.348	-2.201	0.126	0.585	-0.031	0.177	0.527	-0.463	2.013
CT antigen genes	200162	SPAG17|200162	-1.24	-0.637	0.465	-0.342	1.151	0.428	-1.188	0.171	1.116	-0.573	-1.745	-0.209	0.148	-1.914	-2.252	0.063	0.254	0.869	-0.549	-1.201	1.962	0.278	0.516	0.562	0.64	0.07	0.537	0.46	0.167	-3.318	-0.774	-1.034	0.228	0.2	0.071	-0.003	0.402	0.463	-2.638	0.273	-2.356	0.575	0.078	-0.083	0.53	0.248	-0.151
CT antigen genes	26166	RGS22|26166	-0.677	-0.428	-0.582	-0.005	-0.785	0.055	-0.369	0.196	0.787	0.49	0.142	-1.74	-2.091	-2.969	-1.983	0.196	1.759	0.599	0.139	-2.935	-2.187	0.287	1.535	-2.145	0.184	0.848	-0.386	-0.905	-0.62	-2.614	-0.783	-0.454	0.105	0	-0.262	0.473	1.379	1.491	-2.366	-0.27	-0.489	0.189	0.54	0.079	0.774	-3.023	1.924
CT antigen genes	9576	SPAG6|9576	-2.633	-0.272	-1.273	-1.956	0.923	-0.37	0.213	0.416	0.656	-0.213	0.457	-1.28	-0.274	-1.846	0.142	1.57	-1.25	0.345	-0.165	-0.606	-0.262	-1.338	0.333	0.124	0.886	-1.286	0.277	-0.734	-1.407	-1.274	-0.621	-1.47	0.281	0.081	0.116	-2.455	0.953	0.899	-1.05	-1.234	0.506	1.175	-1.308	-1.631	0.148	0.048	-0.2
CT antigen genes	6674	SPAG1|6674	0.653	0.259	1.007	0.425	-0.612	0.446	-0.15	0.573	0.347	1.204	0.192	1.129	0.087	0.671	0.907	1.21	1.012	0.632	0.624	0.372	1.222	0.055	0.001	-0.276	1.045	-0.452	0.775	-1.465	0.076	0.813	2.263	-0.689	-0.512	0.776	0.791	-0.501	-0.346	1.144	-0.533	1.404	-1.927	-0.21	0.019	0.671	0.494	0.094	1.434
CT antigen genes	3948	LDHC|3948	-0.148	1.333	0.265	-1.17	-0.159	0.923	-1.572	-0.578	-2.197	0.524	-0.089	-0.346	-0.352	-3.113	0.757	0.033	1.148	-0.928	0.455	-2.539	0.946	0.082	1.281	0.574	0.389	0.099	-0.035	0.768	1.107	0.413	0.811	0.145	0.536	1.317	-1.493	-0.435	-1.674	0.363	0.191	1.431	0.398	1.037	-1.74	-0.418	0.327	-1.699	0.579
CT antigen genes	125972	CALR3|125972	0.402	-1.662	1.951	-0.609	1.379	-0.679	-0.884	-0.743	0.768	0.086	-0.065	-0.776	-1.379	1.326	-0.425	1.241	0.48	-1.26	-1.11	-0.774	-0.922	-0.927	-0.067	-0.68	0.24	1.895	-0.462	-0.52	-0.337	-1.075	-0.722	-0.485	0.33	0.76	-0.508	-0.456	0.095	1.886	0.494	-0.531	-0.266	1.908	0.484	-0.555	0.177	0.494	1.547
CT antigen genes	26256	CABYR|26256	-1.204	-0.207	0.609	-3.479	-0.711	0.355	-1.472	-0.368	0.904	-0.209	0.439	-2.294	-0.174	-2.144	-0.155	-0.321	1.153	-1.113	-0.09	0.11	-1.331	0.548	0.281	0.346	-0.557	-1.683	1.174	0.455	-2.194	-1.32	-0.793	0.592	0.076	0.897	-0.263	-0.703	-0.409	0.42	-2.507	0.567	2.127	0.518	-2.548	0.364	0.394	2.955	-0.561
CT antigen genes	27120	DKKL1|27120	-0.113	0.809	1.992	0.371	1.219	-1.213	0.031	-0.305	-0.757	0.105	0.285	-0.345	-0.877	-0.566	-0.839	-0.596	-0.666	0.477	-0.284	-0.99	-0.563	-1.099	-0.422	1.116	0.21	1.603	-0.314	0.356	0.61	-0.834	-0.761	-0.356	0.936	-0.11	-0.115	-0.504	0.244	-0.455	-0.591	-0.898	0.596	0.092	-0.809	-0.444	0.04	-1.178	1.322
CT antigen genes	23532	PRAME|23532	-0.406	-0.888	-0.139	0.687	0.598	-2.376	-0.326	-2.387	-0.106	-2.029	0.049	-0.946	-0.745	-0.821	-0.633	-1.548	-0.862	-0.591	2.068	-1.717	-2.089	1.005	0.682	-1.314	-1.604	0.449	0.707	-0.143	-0.056	-1.18	-1.228	-1.147	-1.041	0.707	0.13	0.429	0.305	-1.515	0.009	-0.286	0.208	0.282	0.101	0.081	0.416	0.414	0.106
CT antigen genes	94086	HSPB9|94086	-0.674	-1.12	-1.709	-1.208	1.469	-0.855	-1.2	-0.599	0.758	0.333	0.573	-0.937	-0.29	0.933	0.672	0.021	-0.878	0.551	1.746	0.191	0.47	1.128	-1.339	0.927	0.447	1.83	1.957	0.189	0.49	-0.998	0.399	-1.119	1.451	-1.019	-0.117	0.978	0.329	-1.216	1.015	0.562	0.528	1.709	0.494	1.188	1.47	1.671	-1.546
CT antigen genes	29122	PRSS50|29122	-1.018	0.968	-1.109	0.868	1.279	-0.657	0.197	0.674	0.446	-0.297	1.342	0.171	0.336	0.457	0.462	0.242	0.093	-0.426	-0.116	-2.192	0.314	-1.127	-0.433	-0.704	-1.042	-0.483	1.254	1.117	0.588	-1.398	-2.629	0.432	0.082	-0.351	-1.283	0.104	0.879	1.614	1.271	0.191	0.671	-0.745	0.513	0.635	-0.468	-0.998	0.926
CT antigen genes	6676	SPAG4|6676	-0.249	0.351	-0.161	0.104	0.039	0.739	-0.455	-0.028	0.253	-0.372	-0.288	-0.31	0.793	0.339	0.404	0.131	0.516	0.698	0.097	-0.169	0.581	-2.206	1.697	1.363	0.99	0.024	0.402	0.1	0.77	0.715	0.715	0.082	0.4	0.312	0.448	-0.654	-1.183	0.239	-0.084	-0.719	0.834	0.556	-2.252	1.545	0.688	-0.055	1.252
CT antigen genes	146279	TEKT5|146279	1.771	1.499	-0.876	0.207	-0.182	0.572	-0.708	-0.198	-0.582	0.325	-0.571	-1.102	-1.461	-1.022	0.979	0.501	-1.75	-0.076	-0.708	-0.831	-0.338	-0.636	-1.057	1.859	0.939	1.242	-0.449	0.181	-1.145	-2.336	-0.008	0.303	0.137	0.326	-0.015	0.217	-0.121	2.169	0.539	-1.623	-0.415	0.346	2.078	-0.709	-0.148	0.074	-0.044
CT antigen genes	56155	TEX14|56155	-1.51	-1.215	-0.262	-1.401	-0.807	1.319	0.074	0.042	0.028	-1.101	1.715	-2.277	0.317	-0.197	-1.633	2.502	-0.779	-0.279	1.6	-0.664	-1.753	0.408	1.47	1.875	0.894	1.903	-1.124	1.318	0.548	-1.143	-1.727	1.057	-0.444	-0.898	-0.53	0.299	-0.477	-1.176	-1.216	-0.862	1.052	0.347	1.214	-0.519	-0.677	0.485	-1.198
CT antigen genes	221191	PRSS54|221191	-1.731	0.599	0.25	-0.838	0.002	1.183	0.529	-1.996	-0.477	-1.113	0.378	-1.351	-2.107	-0.923	-1.358	0.354	-2.004	-2.13	-1.018	-1.288	-1.265	-0.137	0.189	1.355	-0.596	1.153	-0.946	0.432	0.777	-0.613	-1.101	0	0.296	-0.21	-1.51	0.493	-1.267	0.322	-1.616	-1.608	0.502	1.034	0.33	-0.175	-1.021	0.175	0.785
CT antigen genes	54763	ROPN1|54763	-0.176	-0.679	-0.242	-1.2	1.551	-1.144	-1.682	-1.023	1.166	0.835	0.639	-1.01	-1.844	0.77	0.171	0.939	-0.359	-0.536	-0.53	-0.476	-0.403	-0.459	1.075	0.327	-0.903	1.38	-2.112	-1.221	-1.538	-0.665	-0.338	-2.292	1.396	0.416	0.715	0.858	0.474	-0.66	-1.754	-0.32	-1.85	0.048	0.048	-1.662	1.1	-0.245	1.294
CT antigen genes	122664	TPPP2|122664	-0.801	1.72	-0.338	1.195	0.845	-1.807	-1.237	1.424	-0.469	-0.461	1.557	-1.78	-1.834	-1.611	-1.269	0.359	0.569	-1.227	0.577	-0.147	1.144	-0.227	-0.757	0.506	0.778	0.324	1.418	0.563	-0.372	-1.198	-0.867	-0.19	0.414	-0.407	-0.34	-0.34	0.115	0.639	0.565	0	-0.165	0.212	0.388	-1.091	-0.779	-0.155	1.866
CT antigen genes	84519	ACRBP|84519	-1.923	0.116	-0.851	0.095	3.296	-0.369	1.757	-0.553	0.491	-0.673	-0.641	0.376	1.718	-1.216	-1.281	-0.856	-0.999	0.69	-0.842	-0.736	-0.674	1.347	1.852	1.795	0.546	-0.698	-0.123	0.909	0.2	-1.236	-1.047	-0.835	1.435	-0.523	0.169	0.583	-0.517	2.109	0.188	-0.107	-0.606	-0.391	0.213	0.455	-0.444	-0.872	0.191
CT antigen genes	89885	FATE1|89885	-0.764	-2.534	-0.048	0.228	-1.688	0.818	-0.273	-0.466	-0.426	-0.527	0.416	-0.55	-1.357	-1.459	-1.791	0.7	-0.51	-0.959	-0.186	0.053	-1.333	-1.314	-0.134	1.066	0.903	-0.419	0.529	-0.299	0.424	-0.407	0.363	-0.979	-0.782	0.116	0.106	0.217	-0.243	-0.119	0.644	-0.999	0.621	-0.233	-2.297	0.122	0.911	-1.09	0.259
CT antigen genes	124912	SPACA3|124912	-1.799	-1.366	0.467	0.48	-0.623	0.14	0.144	-1.651	-1.791	0.042	0.119	-0.604	-2.32	0.179	-0.888	0.184	-0.241	-2.019	-1.631	-2.049	-1.622	0.308	1.129	0.799	-0.616	1.496	-1.837	-0.078	-1.509	-0.574	0.463	0.469	0.216	-2.2	-1.12	0.631	0.657	0.726	-0.604	-0.363	-1.283	0.867	0.333	-1.556	-0.645	0.2	-0.462
CT antigen genes	55510	DDX43|55510	1.642	-2.055	0.623	-0.47	0.681	-0.229	-1.626	-1.689	0.868	0.641	-0.106	-0.877	-1.146	0.222	-0.694	0.275	-1.258	-2.058	-0.009	0.671	-2.205	1.358	-1.841	-0.209	-0.584	1.291	1.245	-1.809	-0.543	-0.999	-1.981	0.19	0.677	-1.675	0.072	0.37	-0.178	-0.56	0.602	-0.563	-0.703	0.73	0.284	-1.879	1.191	-0.015	0.202
CT antigen genes	150763	GPAT2|150763	-0.027	-0.249	-1.262	-0.887	-0.6	-0.65	-0.369	-1.722	1.355	-0.122	1.538	-0.479	0.876	0.941	0.052	-0.074	-1.813	-0.182	0.394	0.187	-1.477	-1.476	-1.363	-1.065	-1.116	0.587	0.699	-1.556	1.358	0.644	-0.504	-0.936	1.554	-0.784	1.066	0.672	2.043	-0.83	0.656	0.287	-0.336	1.626	0.929	-0.582	-0.437	-0.827	0.141
CT antigen genes	93426	SYCE1|93426	-0.784	-0.459	1.054	0.357	-0.407	0.632	0.549	0.317	-1.877	-1.854	-0.232	-1.689	-0.56	0.571	-0.275	0.564	-0.211	-0.79	-0.149	-1.005	-1.602	-0.699	-0.598	-0.826	1.022	0.213	0.752	1.133	-0.819	-1.399	0.331	-1.442	-0.541	-0.24	-0.858	-1.034	1.201	-0.519	-1.629	-0.897	0.838	-1.234	-0.143	0.59	0.998	0.449	1.115
CT antigen genes	339834	CCDC36|339834	-0.625	-1.324	0.662	-0.055	-0.006	0.596	0.611	-2.88	0.165	-1.05	0.309	-2.891	-0.422	-2.571	-1.316	-1.283	-0.553	-0.526	-0.476	-0.672	-2.266	0.833	0.645	-0.624	-1.733	-1.837	-0.421	-3.204	-1.153	-1.607	0.172	0.269	0.226	-1.37	-1.017	0.01	-0.02	-1.269	0.687	-3.618	-1.564	0.907	-0.485	-0.874	-0.147	0.346	1.142
CT antigen genes	7288	TULP2|7288	-1.668	-0.057	-1.455	-0.227	-1.042	0.617	-1.844	-1.785	1.085	-0.736	-1.357	-1.576	-0.485	-2.638	-1.038	-1.611	-1.865	-2.444	-1.881	-0.503	-0.648	-0.117	1.001	0.877	-1.205	0.493	-2.16	-1.835	-0.204	-1.588	0.275	1.058	1.326	-1.193	0	0.446	0.554	-0.738	-1.61	-2.709	-1.209	-0.069	-0.03	-0.853	-1.144	-0.063	0.225
CT antigen genes	55124	PIWIL2|55124	-1.657	-1.166	-0.278	-0.871	-0.853	-0.495	-0.263	0.548	1.073	-0.241	-0.126	-1.134	-0.086	-1.293	-0.572	0.315	-0.797	-0.996	-0.698	-0.597	-1.232	-0.782	-0.064	1.19	1.103	1.362	-0.317	-0.015	-0.099	-1.249	-0.487	0.033	1.108	0.076	-0.832	0.475	-0.029	0.195	-1.78	-1.015	0.743	-0.327	-1.343	0.931	0.115	0.629	-1.892
CT antigen genes	56165	TDRD1|56165	-0.95	-1.044	-0.846	-0.338	-1.313	1.045	0.732	0.57	0.229	0.427	0.828	-1.619	-0.816	-1.442	0.34	-0.662	-1.416	0.34	-2.047	-1.662	1.097	-0.892	1.633	1.031	-0.081	0.627	0.602	-1.321	-0.704	-1.699	-2.08	-0.299	0.981	1.18	-0.054	-0.55	-0.571	-0.448	-0.108	-0.761	-0.35	-0.752	-1.276	0	0.625	-1.418	-0.554
CT antigen genes	125965	COX6B2|125965	-2.478	0.16	0.799	-0.728	1.165	0.348	-0.158	-1.783	0.569	-0.549	0.05	-0.36	-2.281	-0.575	-2.044	0.182	2.024	-1.593	-1.888	-1.363	-1.09	-1.821	-0.197	0.732	-0.377	0.374	-0.917	-1.667	-1.45	-1.824	-0.578	-0.326	-0.098	-0.04	-0.039	-0.742	0.698	0.303	-0.904	-2.203	0.261	0.413	0.634	-0.015	0.742	0.529	0.992
CT antigen genes	93273	LEMD1|93273	0.611	0.226	-1.105	-1.326	0.308	-0.135	-0.506	-0.043	1.025	-0.38	0.689	-1.526	-0.831	0.466	-1.234	-0.056	-0.262	-1.948	0.005	0.134	-0.34	-0.26	0.399	-1.573	1.002	1.463	0.179	-0.142	0.956	-1.016	-1.244	-0.118	-0.03	0.774	1.356	1.197	0.784	-0.416	-0.323	-1.112	0.438	2.547	1.893	0.909	1.583	0.632	1.346
CT antigen genes	162517	FBXO39|162517	-0.048	0.33	-1.687	0.272	-0.929	-1.71	-1.043	-0.567	0.215	-1.996	1.213	-0.57	-0.351	-0.192	-0.768	0.24	-1.941	-0.497	-0.528	-0.357	-0.334	0.267	0.573	-1.295	0.018	-1.207	0.045	-1.609	0.357	-1.41	-0.424	-0.56	0.885	-1.277	-1.217	0.664	0.061	-0.799	-2.333	-1.455	-0.78	0.71	-0.736	0.224	-2.285	0.933	0.42
CT antigen genes	54742	LY6K|54742	-0.181	0.426	0.124	0.4	1.042	1.147	-0.88	0.34	1.348	1.252	-0.559	-0.944	-1.318	-0.893	-0.536	0.562	-1.422	-1.513	-0.915	-0.498	0.312	0.171	1.004	-0.523	0.685	-0.519	-1.018	1.133	0.358	-0.01	-1.539	-1.897	1.564	-0.136	0.474	-1.337	-0.019	-1.352	0.643	0.501	0.556	0.48	-1.54	-0.179	0.51	0.261	0.519
CT antigen genes	51298	THEG|51298	-0.28	0.613	-0.391	0.167	0.235	0.6	-0.747	-0.463	-1.58	0.355	-0.878	-1.45	-0.433	-1.506	-0.861	-0.99	-1.473	-1.675	0.884	-1.071	-1.341	-1.12	-0.818	0.279	0.862	1.018	0.958	-1.112	-1.212	-2.228	0.443	-0.064	-0.529	1.572	-1.288	1.095	-1.198	-0.9	0.191	-2.553	1.833	-1.229	1.296	-2.162	-1.525	1.389	0.375
CT antigen genes	219938	SPATA19|219938	-1.262	-0.177	0.669	-0.477	-0.723	-1.106	0.072	0.045	-0.672	-0.977	0.928	-0.574	-1.24	-0.137	-0.559	0.446	-1.18	-1.609	0.673	-1.412	-2.015	-1.736	-0.498	-0.53	0.925	1.003	-0.139	0.025	0.587	-0.573	-1.349	0.142	-1.017	0.912	-0.853	-0.537	0.567	0.695	1.087	-1.415	0.899	0.578	-0.477	0.132	-1.173	-0.984	0.227
CT antigen genes	6406	SEMG1|6406	0.536	-0.348	-0.203	-0.035	0.838	0.287	1.202	0.247	-0.26	-0.162	1.191	-0.038	-0.633	-0.484	-0.646	0.08	-0.762	-0.865	0.599	-0.209	0.077	-1.94	0.796	-1.011	1.133	-0.369	-1.175	-1.07	0.582	-0.163	1.166	-1.984	1.049	-1.845	-1.114	1.639	0.053	-1.259	-0.548	-0.06	-0.03	-2.054	1.106	0.396	0.458	1.221	-0.911
CT antigen genes	7718	ZNF165|7718	0.482	0.086	-0.356	-0.509	1.209	-0.167	1.391	0.64	0.508	0.719	0.101	1.054	0.984	0.742	0.2	0.367	0.018	-0.157	0.338	-0.08	0.54	-0.004	-2.737	0.07	-0.211	0.241	-2.99	-1.239	-0.472	0.381	-0.002	0.71	0.293	-1.677	-0.756	-0.361	-0.742	-0.98	-0.862	0.843	-1.354	-0.038	-0.056	-0.701	-0.117	-0.23	0.587
	ID	NAME	GSM325806	GSM179859	GSM152780	GSM152630	GSM138037	GSM117720	GSM117709	GSM89026	GSM76512	GSM76501	GSM53083	GSM46931	GSM46864	GSM46865	GSM46856	GSM89010	GSM46894	GSM46871	GSM46820	GSM38094	GSM38081	GSM179846	GSM137934	GSM117721	GSM76570	GSM76558	GSM53127	GSM53122	GSM46944	GSM46875	GSM301676	GSM203744	GSM137917	GSM89070	GSM88984	GSM76567	GSM76504	GSM53144	GSM53100	GSM46910	GSM53167	GSM353907	GSM231920	GSM179917	GSM152694	GSM152642	GSM137913
fantom correlations	immune_blood	immune_blood	0.016	-0.002	0.028	0.012	0.061	0.011	0.004	-0.033	-0.003	0.065	0.003	0.02	0.044	-0.009	0.008	-0.007	0.001	0.039	-0.029	-0.024	0.004	-0.031	-0.045	0.006	0.002	0.039	0.025	0.001	0.01	0.021	0.039	-0.033	0.032	0.057	0.026	0.048	0.025	0.023	0.011	0.005	0.003	-0.034	0.01	-0.025	-0.017	0.021	0.017
fantom correlations	CNS	CNS	-0.079	-0.089	-0.08	-0.045	-0.012	-0.014	-0.023	-0.019	-0.056	-0.072	-0.038	-0.065	-0.114	-0.081	-0.093	-0.018	-0.048	-0.047	0.004	-0.034	-0.079	0.025	-0.031	-0.017	-0.001	0.034	-0.002	0.002	0.023	-0.03	-0.138	0.015	-0.076	-0.026	-0.053	0.004	0.018	-0.028	0.067	-0.04	-0.007	0.039	-0.058	-0.04	-0.02	-0.093	-0.065
fantom correlations	Fibroblast	Fibroblast	-0.069	-0.076	-0.051	-0.018	-0.068	-0.078	-0.009	-0.075	0.001	-0.09	-0.02	-0.038	-0.096	0.006	-0.017	-0.086	-0.036	-0.07	-0.005	0	-0.063	-0.067	-0.006	-0.065	-0.046	-0.056	-0.027	-0.046	-0.02	-0.038	-0.063	-0.011	-0.071	-0.124	-0.115	-0.076	-0.045	-0.037	-0.042	-0.075	-0.031	-0.044	-0.061	-0.014	-0.028	-0.048	-0.06
fantom correlations	Adipocyte	Adipocyte	-0.092	-0.083	-0.069	0.057	-0.075	-0.048	0.042	0.013	-0.018	-0.087	-0.045	0.008	-0.051	0.04	0.013	0.056	0.001	0.005	0.086	-0.01	-0.09	-0.072	0.045	-0.043	-0.044	-0.062	0.035	-0.018	0.015	0.077	-0.016	-0.041	-0.036	-0.083	-0.097	-0.023	-0.028	-0.033	-0.014	-0.03	-0.046	-0.043	-0.065	-0.026	-0.038	-0.07	-0.023
	ID	NAME	GSM325806	GSM179859	GSM152780	GSM152630	GSM138037	GSM117720	GSM117709	GSM89026	GSM76512	GSM76501	GSM53083	GSM46931	GSM46864	GSM46865	GSM46856	GSM89010	GSM46894	GSM46871	GSM46820	GSM38094	GSM38081	GSM179846	GSM137934	GSM117721	GSM76570	GSM76558	GSM53127	GSM53122	GSM46944	GSM46875	GSM301676	GSM203744	GSM137917	GSM89070	GSM88984	GSM76567	GSM76504	GSM53144	GSM53100	GSM46910	GSM53167	GSM353907	GSM231920	GSM179917	GSM152694	GSM152642	GSM137913
NET genes	1113	CHGA|1113	-0.0313462	0.948759	1.19673	-0.595704	0.348719	1.55649	1.46077	0.499988	1.36013	0.62374	-0.0669023	1.63532	0.193824	-0.075493	0.652961	0.501897	-0.0887939	-2.583	4.50098	1.40906	-2.24719	0.473178	0.4827	0.220816	0.117867	0.965828	-1.28605	-0.820442	-0.289768	-0.876356	0.764408	-0.278905	-0.356123	0.476609	0.134934	0.471954	-0.742693	1.93034	0.0195065	-0.566874	1.10725	-0.207716	0.535746	0.978788	-0.374391	0.800816	1.82358
NET genes	6855	SYP|6855	-1.41654	0.55995	-0.401499	-0.102031	1.75243	1.71764	0.416018	-0.920847	0.416018	-1.1132	-0.703229	-1.59031	-0.58763	-1.19154	-1.15741	0.60822	0.348399	-0.217086	0.306929	-0.498946	-0.896423	-1.45787	0.483227	-0.120171	2.21213	0.579921	-0.578669	0.717421	-1.0664	-0.791296	1.35657	0.0489395	-0.271564	-0.672771	-0.245436	0.873776	1.02429	0.727118	0.279505	-1.10605	-0.468002	2.23488	0.823064	-0.646097	0.566907	0.912076	-0.598552
NET genes	4684	NCAM1|4684	-2.72997	0.0400848	0.617974	0.23435	-0.780923	0.27444	0.156012	-0.547882	0.806869	-0.062686	-0.134599	-2.68301	-0.607017	-0.0672157	-1.24034	-0.978375	-0.801807	-2.37838	-0.946405	-1.72325	-1.49271	0.708567	-0.77316	0.851739	0.481458	1.20757	0.865001	0.272448	-1.21417	-2.65754	-1.74156	-0.364839	-2.2938	-0.981928	-1.36887	-1.07078	0.363354	-0.0375242	0.425541	-2.14223	0.00810402	-1.61188	0.527496	-1.30342	0.446154	0.824293	-0.915984
NET genes	2026	ENO2|2026	-0.404813	0.837433	-1.18902	-0.403551	1.90648	0.242832	0.13258	-0.701143	2.21672	1.86807	-1.17235	0.403422	0.0321161	0.967997	-0.487525	-1.45909	-0.589224	1.49125	-1.43243	0.125156	-2.51873	-1.40407	1.35923	0.231384	0.717766	0.123911	0.249866	0.366246	1.62248	-0.0505835	-1.11931	1.59222	0.910896	-0.728013	0.792003	-0.486322	0.188807	-0.50931	-1.41623	-0.616102	-0.101754	0.237425	-0.323488	1.42551	0.0760713	0.128177	0.353529
NET genes	1045	CDX2|1045	0.555687	0.0284739	0.272888	0.351294	-2.51366	0.0576389	0.0712348	0.378642	-0.00662916	0.157384	-0.64895	0.249862	0.623633	0.537073	0.352866	1.6485	-0.525685	-1.13049	-0.743311	-0.504717	-0.901687	-1.32467	-0.724991	0.58295	0.59479	0.47605	0.0467734	-0.0238935	-0.705497	-1.51516	1.43197	-0.154493	2.42923	0	-0.0046059	-0.415151	-0.481864	0.427813	0.0792555	-0.798777	1.64959	0.234301	1.31381	-0.0498677	2.75857	-0.0282461	-0.246689
[truncated: 1,994 more columns]

## Sheet: CCLE results
			pan-cancer class
KPNYN_AUTONOMIC_GANGLIA	AUTONOMIC_GANGLIA	KPNYN	1
SKNDZ_AUTONOMIC_GANGLIA	AUTONOMIC_GANGLIA	SKNDZ	1
MHHNB11_AUTONOMIC_GANGLIA	AUTONOMIC_GANGLIA	MHHNB11	1
SNU1196_BILIARY_TRACT	BILIARY_TRACT	SNU1196	1
SNU869_BILIARY_TRACT	BILIARY_TRACT	SNU869	1
EWS502_BONE	BONE	EWS502	1
TC32_BONE	BONE	TC32	1
EW8_BONE	BONE	EW8	1
EFM19_BREAST	BREAST	EFM19	1
AU565_BREAST	BREAST	AU565	1
BT20_BREAST	BREAST	BT20	1
UACC812_BREAST	BREAST	UACC812	1
UACC893_BREAST	BREAST	UACC893	1
HMEL_BREAST	BREAST	HMEL	1
SNU738_CENTRAL_NERVOUS_SYSTEM	CENTRAL_NERVOUS_SYSTEM	SNU738	1
LN443_CENTRAL_NERVOUS_SYSTEM	CENTRAL_NERVOUS_SYSTEM	LN443	1
LN428_CENTRAL_NERVOUS_SYSTEM	CENTRAL_NERVOUS_SYSTEM	LN428	1
SF172_CENTRAL_NERVOUS_SYSTEM	CENTRAL_NERVOUS_SYSTEM	SF172	1
U343_CENTRAL_NERVOUS_SYSTEM	CENTRAL_NERVOUS_SYSTEM	U343	1
LN215_CENTRAL_NERVOUS_SYSTEM	CENTRAL_NERVOUS_SYSTEM	LN215	1
LN464_CENTRAL_NERVOUS_SYSTEM	CENTRAL_NERVOUS_SYSTEM	LN464	1
F5_CENTRAL_NERVOUS_SYSTEM	CENTRAL_NERVOUS_SYSTEM	F5	1
A1207_CENTRAL_NERVOUS_SYSTEM	CENTRAL_NERVOUS_SYSTEM	A1207	1
LN382_CENTRAL_NERVOUS_SYSTEM	CENTRAL_NERVOUS_SYSTEM	LN382	1
IOMMLEE_CENTRAL_NERVOUS_SYSTEM	CENTRAL_NERVOUS_SYSTEM	IOMMLEE	1
LN340_CENTRAL_NERVOUS_SYSTEM	CENTRAL_NERVOUS_SYSTEM	LN340	1
CH157MN_CENTRAL_NERVOUS_SYSTEM	CENTRAL_NERVOUS_SYSTEM	CH157MN	1
HEC108_ENDOMETRIUM	ENDOMETRIUM	HEC108	1
SNGM_ENDOMETRIUM	ENDOMETRIUM	SNGM	1
KMS12BM_HAEMATOPOIETIC_AND_LYMPHOID_TISSUE	HAEMATOPOIETIC_AND_LYMPHOID_TISSUE	KMS12BM	1
K562_HAEMATOPOIETIC_AND_LYMPHOID_TISSUE	HAEMATOPOIETIC_AND_LYMPHOID_TISSUE	K562	1
MV411_HAEMATOPOIETIC_AND_LYMPHOID_TISSUE	HAEMATOPOIETIC_AND_LYMPHOID_TISSUE	MV411	1
MOLM13_HAEMATOPOIETIC_AND_LYMPHOID_TISSUE	HAEMATOPOIETIC_AND_LYMPHOID_TISSUE	MOLM13	1
RL_HAEMATOPOIETIC_AND_LYMPHOID_TISSUE	HAEMATOPOIETIC_AND_LYMPHOID_TISSUE	RL	1
MC116_HAEMATOPOIETIC_AND_LYMPHOID_TISSUE	HAEMATOPOIETIC_AND_LYMPHOID_TISSUE	MC116	1
P3HR1_HAEMATOPOIETIC_AND_LYMPHOID_TISSUE	HAEMATOPOIETIC_AND_LYMPHOID_TISSUE	P3HR1	1
HUNS1_HAEMATOPOIETIC_AND_LYMPHOID_TISSUE	HAEMATOPOIETIC_AND_LYMPHOID_TISSUE	HUNS1	1
RAJI_HAEMATOPOIETIC_AND_LYMPHOID_TISSUE	HAEMATOPOIETIC_AND_LYMPHOID_TISSUE	RAJI	1
NCIH929_HAEMATOPOIETIC_AND_LYMPHOID_TISSUE	HAEMATOPOIETIC_AND_LYMPHOID_TISSUE	NCIH929	1
PEER_HAEMATOPOIETIC_AND_LYMPHOID_TISSUE	HAEMATOPOIETIC_AND_LYMPHOID_TISSUE	PEER	1
U937_HAEMATOPOIETIC_AND_LYMPHOID_TISSUE	HAEMATOPOIETIC_AND_LYMPHOID_TISSUE	U937	1
TF1_HAEMATOPOIETIC_AND_LYMPHOID_TISSUE	HAEMATOPOIETIC_AND_LYMPHOID_TISSUE	TF1	1
ME1_HAEMATOPOIETIC_AND_LYMPHOID_TISSUE	HAEMATOPOIETIC_AND_LYMPHOID_TISSUE	ME1	1
NUDHL1_HAEMATOPOIETIC_AND_LYMPHOID_TISSUE	HAEMATOPOIETIC_AND_LYMPHOID_TISSUE	NUDHL1	1
KYO1_HAEMATOPOIETIC_AND_LYMPHOID_TISSUE	HAEMATOPOIETIC_AND_LYMPHOID_TISSUE	KYO1	1
SUDHL10_HAEMATOPOIETIC_AND_LYMPHOID_TISSUE	HAEMATOPOIETIC_AND_LYMPHOID_TISSUE	SUDHL10	1
SUDHL4_HAEMATOPOIETIC_AND_LYMPHOID_TISSUE	HAEMATOPOIETIC_AND_LYMPHOID_TISSUE	SUDHL4	1
BV173_HAEMATOPOIETIC_AND_LYMPHOID_TISSUE	HAEMATOPOIETIC_AND_LYMPHOID_TISSUE	BV173	1
KASUMI1_HAEMATOPOIETIC_AND_LYMPHOID_TISSUE	HAEMATOPOIETIC_AND_LYMPHOID_TISSUE	KASUMI1	1
SET2_HAEMATOPOIETIC_AND_LYMPHOID_TISSUE	HAEMATOPOIETIC_AND_LYMPHOID_TISSUE	SET2	1
SUDHL8_HAEMATOPOIETIC_AND_LYMPHOID_TISSUE	HAEMATOPOIETIC_AND_LYMPHOID_TISSUE	SUDHL8	1
COLO775_HAEMATOPOIETIC_AND_LYMPHOID_TISSUE	HAEMATOPOIETIC_AND_LYMPHOID_TISSUE	COLO775	1
SLR23_KIDNEY	KIDNEY	SLR23	1
SLR24_KIDNEY	KIDNEY	SLR24	1
SKRC31_KIDNEY	KIDNEY	SKRC31	1
RCC4_KIDNEY	KIDNEY	RCC4	1
SLR25_KIDNEY	KIDNEY	SLR25	1
SLR26_KIDNEY	KIDNEY	SLR26	1
SKRC20_KIDNEY	KIDNEY	SKRC20	1
UMRC6_KIDNEY	KIDNEY	UMRC6	1
SLR21_KIDNEY	KIDNEY	SLR21	1
SLR20_KIDNEY	KIDNEY	SLR20	1
HK2_KIDNEY	KIDNEY	HK2	1
UOK101_KIDNEY	KIDNEY	UOK101	1
SW1463_LARGE_INTESTINE	LARGE_INTESTINE	SW1463	1
COLO201_LARGE_INTESTINE	LARGE_INTESTINE	COLO201	1
NCIH508_LARGE_INTESTINE	LARGE_INTESTINE	NCIH508	1
RCM1_LARGE_INTESTINE	LARGE_INTESTINE	RCM1	1
CL14_LARGE_INTESTINE	LARGE_INTESTINE	CL14	1
CL40_LARGE_INTESTINE	LARGE_INTESTINE	CL40	1
HCT8_LARGE_INTESTINE	LARGE_INTESTINE	HCT8	1
HEPG2_LIVER	LIVER	HEPG2	1
C3A_LIVER	LIVER	C3A	1
PLCPRF5_LIVER	LIVER	PLCPRF5	1
CORL23_LUNG	LUNG	CORL23	1
MORCPR_LUNG	LUNG	MORCPR	1
NCIH1437_LUNG	LUNG	NCIH1437	1
NCIH2342_LUNG	LUNG	NCIH2342	1
DV90_LUNG	LUNG	DV90	1
NCIH1623_LUNG	LUNG	NCIH1623	1
CHAGOK1_LUNG	LUNG	CHAGOK1	1
HCC1195_LUNG	LUNG	HCC1195	1
NCIH292_LUNG	LUNG	NCIH292	1
SALE_LUNG	LUNG	SALE	1
HCC2814_LUNG	LUNG	HCC2814	1
HCC364_LUNG	LUNG	HCC364	1
DFCI024_LUNG	LUNG	DFCI024	1
HCC1897_LUNG	LUNG	HCC1897	1
HCC827GR5_LUNG	LUNG	HCC827GR5	1
COLO680N_OESOPHAGUS	OESOPHAGUS	COLO680N	1
JHESOAD1_OESOPHAGUS	OESOPHAGUS	JHESOAD1	1
EFO27_OVARY	OVARY	EFO27	1
OVSAHO_OVARY	OVARY	OVSAHO	1
RMGI_OVARY	OVARY	RMGI	1
KURAMOCHI_OVARY	OVARY	KURAMOCHI	1
PK59_PANCREAS	PANCREAS	PK59	1
HPAFII_PANCREAS	PANCREAS	HPAFII	1
KLM1_PANCREAS	PANCREAS	KLM1	1
NCIH2452_PLEURA	PLEURA	NCIH2452	1
ISTMES2_PLEURA	PLEURA	ISTMES2	1
MALME3M_SKIN	SKIN	MALME3M	1
SKMEL5_SKIN	SKIN	SKMEL5	1
COLO792_SKIN	SKIN	COLO792	1
WM983B_SKIN	SKIN	WM983B	1
GRM_SKIN	SKIN	GRM	1
G402_SOFT_TISSUE	SOFT_TISSUE	G402	1
MESSA_SOFT_TISSUE	SOFT_TISSUE	MESSA	1
KATOIII_STOMACH	STOMACH	KATOIII	1
SNU601_STOMACH	STOMACH	SNU601	1
FTC238_THYROID	THYROID	FTC238	1
BICR31_UPPER_AERODIGESTIVE_TRACT	UPPER_AERODIGESTIVE_TRACT	BICR31	1
BICR56_UPPER_AERODIGESTIVE_TRACT	UPPER_AERODIGESTIVE_TRACT	BICR56	1
BICR6_UPPER_AERODIGESTIVE_TRACT	UPPER_AERODIGESTIVE_TRACT	BICR6	1
BICR22_UPPER_AERODIGESTIVE_TRACT	UPPER_AERODIGESTIVE_TRACT	BICR22	1
CAL33_UPPER_AERODIGESTIVE_TRACT	UPPER_AERODIGESTIVE_TRACT	CAL33	1
SW780_URINARY_TRACT	URINARY_TRACT	SW780	1
UMUC1_URINARY_TRACT	URINARY_TRACT	UMUC1	1
SKNFI_AUTONOMIC_GANGLIA	AUTONOMIC_GANGLIA	SKNFI	2
NB1_AUTONOMIC_GANGLIA	AUTONOMIC_GANGLIA	NB1	2
SNU245_BILIARY_TRACT	BILIARY_TRACT	SNU245	2
A673_BONE	BONE	A673	2
SKNMC_BONE	BONE	SKNMC	2
EVSAT_BREAST	BREAST	EVSAT	2
MDAMB415_BREAST	BREAST	MDAMB415	2
HCC2218_BREAST	BREAST	HCC2218	2
T47D_BREAST	BREAST	T47D	2
HCC1419_BREAST	BREAST	HCC1419	2
HCC1428_BREAST	BREAST	HCC1428	2
ZR7530_BREAST	BREAST	ZR7530	2
HCC1500_BREAST	BREAST	HCC1500	2
GOS3_CENTRAL_NERVOUS_SYSTEM	CENTRAL_NERVOUS_SYSTEM	GOS3	2
1321N1_CENTRAL_NERVOUS_SYSTEM	CENTRAL_NERVOUS_SYSTEM	1321N1	2
SNB19_CENTRAL_NERVOUS_SYSTEM	CENTRAL_NERVOUS_SYSTEM	SNB19	2
U251MG_CENTRAL_NERVOUS_SYSTEM	CENTRAL_NERVOUS_SYSTEM	U251MG	2
HEC1A_ENDOMETRIUM	ENDOMETRIUM	HEC1A	2
ISHIKAWAHERAKLIO02ER_ENDOMETRIUM	ENDOMETRIUM	ISHIKAWAHERAKLIO02ER	2
HT_HAEMATOPOIETIC_AND_LYMPHOID_TISSUE	HAEMATOPOIETIC_AND_LYMPHOID_TISSUE	HT	2
KMS26_HAEMATOPOIETIC_AND_LYMPHOID_TISSUE	HAEMATOPOIETIC_AND_LYMPHOID_TISSUE	KMS26	2
KMS34_HAEMATOPOIETIC_AND_LYMPHOID_TISSUE	HAEMATOPOIETIC_AND_LYMPHOID_TISSUE	KMS34	2
NCO2_HAEMATOPOIETIC_AND_LYMPHOID_TISSUE	HAEMATOPOIETIC_AND_LYMPHOID_TISSUE	NCO2	2
KHM1B_HAEMATOPOIETIC_AND_LYMPHOID_TISSUE	HAEMATOPOIETIC_AND_LYMPHOID_TISSUE	KHM1B	2
CMK115_HAEMATOPOIETIC_AND_LYMPHOID_TISSUE	HAEMATOPOIETIC_AND_LYMPHOID_TISSUE	CMK115	2
U266B1_HAEMATOPOIETIC_AND_LYMPHOID_TISSUE	HAEMATOPOIETIC_AND_LYMPHOID_TISSUE	U266B1	2
BL70_HAEMATOPOIETIC_AND_LYMPHOID_TISSUE	HAEMATOPOIETIC_AND_LYMPHOID_TISSUE	BL70	2
OCILY10_HAEMATOPOIETIC_AND_LYMPHOID_TISSUE	HAEMATOPOIETIC_AND_LYMPHOID_TISSUE	OCILY10	2
ST486_HAEMATOPOIETIC_AND_LYMPHOID_TISSUE	HAEMATOPOIETIC_AND_LYMPHOID_TISSUE	ST486	2
L363_HAEMATOPOIETIC_AND_LYMPHOID_TISSUE	HAEMATOPOIETIC_AND_LYMPHOID_TISSUE	L363	2
KARPAS620_HAEMATOPOIETIC_AND_LYMPHOID_TISSUE	HAEMATOPOIETIC_AND_LYMPHOID_TISSUE	KARPAS620	2
JK1_HAEMATOPOIETIC_AND_LYMPHOID_TISSUE	HAEMATOPOIETIC_AND_LYMPHOID_TISSUE	JK1	2
HEL_HAEMATOPOIETIC_AND_LYMPHOID_TISSUE	HAEMATOPOIETIC_AND_LYMPHOID_TISSUE	HEL	2
A704_KIDNEY	KIDNEY	A704	2
TUHR14TKB_KIDNEY	KIDNEY	TUHR14TKB	2
GP2D_LARGE_INTESTINE	LARGE_INTESTINE	GP2D	2
HT55_LARGE_INTESTINE	LARGE_INTESTINE	HT55	2
ASPC1_PANCREAS	PANCREAS	ASPC1	2
NCIH28_PLEURA	PLEURA	NCIH28	2
VCAP_PROSTATE	PROSTATE	VCAP	2
UACC257_SKIN	SKIN	UACC257	2
MELHO_SKIN	SKIN	MELHO	2
COLO741_SKIN	SKIN	COLO741	2
C32_SKIN	SKIN	C32	2
MEWO_SKIN	SKIN	MEWO	2
WM88_SKIN	SKIN	WM88	2
SKMEL28_SKIN	SKIN	SKMEL28	2
KYM1_SOFT_TISSUE	SOFT_TISSUE	KYM1	2
MKN45_STOMACH	STOMACH	MKN45	2
SNU719_STOMACH	STOMACH	SNU719	2
HSC4_UPPER_AERODIGESTIVE_TRACT	UPPER_AERODIGESTIVE_TRACT	HSC4	2
SNU1066_UPPER_AERODIGESTIVE_TRACT	UPPER_AERODIGESTIVE_TRACT	SNU1066	2
SNU1041_UPPER_AERODIGESTIVE_TRACT	UPPER_AERODIGESTIVE_TRACT	SNU1041	2
RT4_URINARY_TRACT	URINARY_TRACT	RT4	2
HT1197_URINARY_TRACT	URINARY_TRACT	HT1197	2
SKNAS_AUTONOMIC_GANGLIA	AUTONOMIC_GANGLIA	SKNAS	3
SJSA1_BONE	BONE	SJSA1	3
HS870T_BONE	BONE	HS870T	3
SW1088_CENTRAL_NERVOUS_SYSTEM	CENTRAL_NERVOUS_SYSTEM	SW1088	3
MFE319_ENDOMETRIUM	ENDOMETRIUM	MFE319	3
HEC151_ENDOMETRIUM	ENDOMETRIUM	HEC151	3
HEC59_ENDOMETRIUM	ENDOMETRIUM	HEC59	3
MOLT4_HAEMATOPOIETIC_AND_LYMPHOID_TISSUE	HAEMATOPOIETIC_AND_LYMPHOID_TISSUE	MOLT4	3
MM1S_HAEMATOPOIETIC_AND_LYMPHOID_TISSUE	HAEMATOPOIETIC_AND_LYMPHOID_TISSUE	MM1S	3
BDCM_HAEMATOPOIETIC_AND_LYMPHOID_TISSUE	HAEMATOPOIETIC_AND_LYMPHOID_TISSUE	BDCM	3
CA46_HAEMATOPOIETIC_AND_LYMPHOID_TISSUE	HAEMATOPOIETIC_AND_LYMPHOID_TISSUE	CA46	3
GDM1_HAEMATOPOIETIC_AND_LYMPHOID_TISSUE	HAEMATOPOIETIC_AND_LYMPHOID_TISSUE	GDM1	3
EB2_HAEMATOPOIETIC_AND_LYMPHOID_TISSUE	HAEMATOPOIETIC_AND_LYMPHOID_TISSUE	EB2	3
EB1_HAEMATOPOIETIC_AND_LYMPHOID_TISSUE	HAEMATOPOIETIC_AND_LYMPHOID_TISSUE	EB1	3
DAUDI_HAEMATOPOIETIC_AND_LYMPHOID_TISSUE	HAEMATOPOIETIC_AND_LYMPHOID_TISSUE	DAUDI	3
KO52_HAEMATOPOIETIC_AND_LYMPHOID_TISSUE	HAEMATOPOIETIC_AND_LYMPHOID_TISSUE	KO52	3
KE97_HAEMATOPOIETIC_AND_LYMPHOID_TISSUE	HAEMATOPOIETIC_AND_LYMPHOID_TISSUE	KE97	3
HS611T_HAEMATOPOIETIC_AND_LYMPHOID_TISSUE	HAEMATOPOIETIC_AND_LYMPHOID_TISSUE	HS611T	3
TOLEDO_HAEMATOPOIETIC_AND_LYMPHOID_TISSUE	HAEMATOPOIETIC_AND_LYMPHOID_TISSUE	TOLEDO	3
OCILY3_HAEMATOPOIETIC_AND_LYMPHOID_TISSUE	HAEMATOPOIETIC_AND_LYMPHOID_TISSUE	OCILY3	3
KG1_HAEMATOPOIETIC_AND_LYMPHOID_TISSUE	HAEMATOPOIETIC_AND_LYMPHOID_TISSUE	KG1	3
CI1_HAEMATOPOIETIC_AND_LYMPHOID_TISSUE	HAEMATOPOIETIC_AND_LYMPHOID_TISSUE	CI1	3
PFEIFFER_HAEMATOPOIETIC_AND_LYMPHOID_TISSUE	HAEMATOPOIETIC_AND_LYMPHOID_TISSUE	PFEIFFER	3
JVM3_HAEMATOPOIETIC_AND_LYMPHOID_TISSUE	HAEMATOPOIETIC_AND_LYMPHOID_TISSUE	JVM3	3
MHHCALL2_HAEMATOPOIETIC_AND_LYMPHOID_TISSUE	HAEMATOPOIETIC_AND_LYMPHOID_TISSUE	MHHCALL2	3
MOLT16_HAEMATOPOIETIC_AND_LYMPHOID_TISSUE	HAEMATOPOIETIC_AND_LYMPHOID_TISSUE	MOLT16	3
JVM2_HAEMATOPOIETIC_AND_LYMPHOID_TISSUE	HAEMATOPOIETIC_AND_LYMPHOID_TISSUE	JVM2	3
NUDUL1_HAEMATOPOIETIC_AND_LYMPHOID_TISSUE	HAEMATOPOIETIC_AND_LYMPHOID_TISSUE	NUDUL1	3
SUDHL6_HAEMATOPOIETIC_AND_LYMPHOID_TISSUE	HAEMATOPOIETIC_AND_LYMPHOID_TISSUE	SUDHL6	3
REC1_HAEMATOPOIETIC_AND_LYMPHOID_TISSUE	HAEMATOPOIETIC_AND_LYMPHOID_TISSUE	REC1	3
MEC1_HAEMATOPOIETIC_AND_LYMPHOID_TISSUE	HAEMATOPOIETIC_AND_LYMPHOID_TISSUE	MEC1	3
SIGM5_HAEMATOPOIETIC_AND_LYMPHOID_TISSUE	HAEMATOPOIETIC_AND_LYMPHOID_TISSUE	SIGM5	3
SUDHL5_HAEMATOPOIETIC_AND_LYMPHOID_TISSUE	HAEMATOPOIETIC_AND_LYMPHOID_TISSUE	SUDHL5	3
MEC2_HAEMATOPOIETIC_AND_LYMPHOID_TISSUE	HAEMATOPOIETIC_AND_LYMPHOID_TISSUE	MEC2	3
EJM_HAEMATOPOIETIC_AND_LYMPHOID_TISSUE	HAEMATOPOIETIC_AND_LYMPHOID_TISSUE	EJM	3
WSUDLCL2_HAEMATOPOIETIC_AND_LYMPHOID_TISSUE	HAEMATOPOIETIC_AND_LYMPHOID_TISSUE	WSUDLCL2	3
MOLP8_HAEMATOPOIETIC_AND_LYMPHOID_TISSUE	HAEMATOPOIETIC_AND_LYMPHOID_TISSUE	MOLP8	3
MOLP2_HAEMATOPOIETIC_AND_LYMPHOID_TISSUE	HAEMATOPOIETIC_AND_LYMPHOID_TISSUE	MOLP2	3
UT7_HAEMATOPOIETIC_AND_LYMPHOID_TISSUE	HAEMATOPOIETIC_AND_LYMPHOID_TISSUE	UT7	3
GRANTA519_HAEMATOPOIETIC_AND_LYMPHOID_TISSUE	HAEMATOPOIETIC_AND_LYMPHOID_TISSUE	GRANTA519	3
MOLT13_HAEMATOPOIETIC_AND_LYMPHOID_TISSUE	HAEMATOPOIETIC_AND_LYMPHOID_TISSUE	MOLT13	3
ALLSIL_HAEMATOPOIETIC_AND_LYMPHOID_TISSUE	HAEMATOPOIETIC_AND_LYMPHOID_TISSUE	ALLSIL	3
DND41_HAEMATOPOIETIC_AND_LYMPHOID_TISSUE	HAEMATOPOIETIC_AND_LYMPHOID_TISSUE	DND41	3
JEKO1_HAEMATOPOIETIC_AND_LYMPHOID_TISSUE	HAEMATOPOIETIC_AND_LYMPHOID_TISSUE	JEKO1	3
NALM19_HAEMATOPOIETIC_AND_LYMPHOID_TISSUE	HAEMATOPOIETIC_AND_LYMPHOID_TISSUE	NALM19	3
HPBALL_HAEMATOPOIETIC_AND_LYMPHOID_TISSUE	HAEMATOPOIETIC_AND_LYMPHOID_TISSUE	HPBALL	3
MOTN1_HAEMATOPOIETIC_AND_LYMPHOID_TISSUE	HAEMATOPOIETIC_AND_LYMPHOID_TISSUE	MOTN1	3
OCILY19_HAEMATOPOIETIC_AND_LYMPHOID_TISSUE	HAEMATOPOIETIC_AND_LYMPHOID_TISSUE	OCILY19	3
KASUMI6_HAEMATOPOIETIC_AND_LYMPHOID_TISSUE	HAEMATOPOIETIC_AND_LYMPHOID_TISSUE	KASUMI6	3
MINO_HAEMATOPOIETIC_AND_LYMPHOID_TISSUE	HAEMATOPOIETIC_AND_LYMPHOID_TISSUE	MINO	3
EHEB_HAEMATOPOIETIC_AND_LYMPHOID_TISSUE	HAEMATOPOIETIC_AND_LYMPHOID_TISSUE	EHEB	3
DOHH2_HAEMATOPOIETIC_AND_LYMPHOID_TISSUE	HAEMATOPOIETIC_AND_LYMPHOID_TISSUE	DOHH2	3
EOL1_HAEMATOPOIETIC_AND_LYMPHOID_TISSUE	HAEMATOPOIETIC_AND_LYMPHOID_TISSUE	EOL1	3
MONOMAC1_HAEMATOPOIETIC_AND_LYMPHOID_TISSUE	HAEMATOPOIETIC_AND_LYMPHOID_TISSUE	MONOMAC1	3
PF382_HAEMATOPOIETIC_AND_LYMPHOID_TISSUE	HAEMATOPOIETIC_AND_LYMPHOID_TISSUE	PF382	3
OCIAML2_HAEMATOPOIETIC_AND_LYMPHOID_TISSUE	HAEMATOPOIETIC_AND_LYMPHOID_TISSUE	OCIAML2	3
OCIAML5_HAEMATOPOIETIC_AND_LYMPHOID_TISSUE	HAEMATOPOIETIC_AND_LYMPHOID_TISSUE	OCIAML5	3
KE37_HAEMATOPOIETIC_AND_LYMPHOID_TISSUE	HAEMATOPOIETIC_AND_LYMPHOID_TISSUE	KE37	3
RI1_HAEMATOPOIETIC_AND_LYMPHOID_TISSUE	HAEMATOPOIETIC_AND_LYMPHOID_TISSUE	RI1	3
KARPAS422_HAEMATOPOIETIC_AND_LYMPHOID_TISSUE	HAEMATOPOIETIC_AND_LYMPHOID_TISSUE	KARPAS422	3
MHHCALL4_HAEMATOPOIETIC_AND_LYMPHOID_TISSUE	HAEMATOPOIETIC_AND_LYMPHOID_TISSUE	MHHCALL4	3
MUTZ5_HAEMATOPOIETIC_AND_LYMPHOID_TISSUE	HAEMATOPOIETIC_AND_LYMPHOID_TISSUE	MUTZ5	3
KOPN8_HAEMATOPOIETIC_AND_LYMPHOID_TISSUE	HAEMATOPOIETIC_AND_LYMPHOID_TISSUE	KOPN8	3
BL41_HAEMATOPOIETIC_AND_LYMPHOID_TISSUE	HAEMATOPOIETIC_AND_LYMPHOID_TISSUE	BL41	3
TALL1_HAEMATOPOIETIC_AND_LYMPHOID_TISSUE	HAEMATOPOIETIC_AND_LYMPHOID_TISSUE	TALL1	3
KMS18_HAEMATOPOIETIC_AND_LYMPHOID_TISSUE	HAEMATOPOIETIC_AND_LYMPHOID_TISSUE	KMS18	3
NAMALWA_HAEMATOPOIETIC_AND_LYMPHOID_TISSUE	HAEMATOPOIETIC_AND_LYMPHOID_TISSUE	NAMALWA	3
769P_KIDNEY	KIDNEY	769P	3
VMRCRCW_KIDNEY	KIDNEY	VMRCRCW	3
CAKI1_KIDNEY	KIDNEY	CAKI1	3
LS1034_LARGE_INTESTINE	LARGE_INTESTINE	LS1034	3
SW1116_LARGE_INTESTINE	LARGE_INTESTINE	SW1116	3
COLO205_LARGE_INTESTINE	LARGE_INTESTINE	COLO205	3
LS513_LARGE_INTESTINE	LARGE_INTESTINE	LS513	3
SNU283_LARGE_INTESTINE	LARGE_INTESTINE	SNU283	3
HUH1_LIVER	LIVER	HUH1	3
SNU878_LIVER	LIVER	SNU878	3
SQ1_LUNG	LUNG	SQ1	3
HCC44_LUNG	LUNG	HCC44	3
NCIH1793_LUNG	LUNG	NCIH1793	3
LU65_LUNG	LUNG	LU65	3
CALU3_LUNG	LUNG	CALU3	3
NCIH2110_LUNG	LUNG	NCIH2110	3
OE33_OESOPHAGUS	OESOPHAGUS	OE33	3
KYSE410_OESOPHAGUS	OESOPHAGUS	KYSE410	3
KYSE510_OESOPHAGUS	OESOPHAGUS	KYSE510	3
KYSE30_OESOPHAGUS	OESOPHAGUS	KYSE30	3
TE5_OESOPHAGUS	OESOPHAGUS	TE5	3
OV90_OVARY	OVARY	OV90	3
TYKNU_OVARY	OVARY	TYKNU	3
OV56_OVARY	OVARY	OV56	3
OVMANA_OVARY	OVARY	OVMANA	3
YAPC_PANCREAS	PANCREAS	YAPC	3
LNCAPCLONEFGC_PROSTATE	PROSTATE	LNCAPCLONEFGC	3
SKMEL30_SKIN	SKIN	SKMEL30	3
IGR1_SKIN	SKIN	IGR1	3
OCUM1_STOMACH	STOMACH	OCUM1	3
SNU5_STOMACH	STOMACH	SNU5	3
NUGC4_STOMACH	STOMACH	NUGC4	3
SNU1076_UPPER_AERODIGESTIVE_TRACT	UPPER_AERODIGESTIVE_TRACT	SNU1076	3
SIMA_AUTONOMIC_GANGLIA	AUTONOMIC_GANGLIA	SIMA	4
CHP126_AUTONOMIC_GANGLIA	AUTONOMIC_GANGLIA	CHP126	4
IMR32_AUTONOMIC_GANGLIA	AUTONOMIC_GANGLIA	IMR32	4
SHSY5Y_AUTONOMIC_GANGLIA	AUTONOMIC_GANGLIA	SHSY5Y	4
KPNRTBM1_AUTONOMIC_GANGLIA	AUTONOMIC_GANGLIA	KPNRTBM1	4
SNU1079_BILIARY_TRACT	BILIARY_TRACT	SNU1079	4
SKES1_BONE	BONE	SKES1	4
MHHES1_BONE	BONE	MHHES1	4
CADOES1_BONE	BONE	CADOES1	4
CAMA1_BREAST	BREAST	CAMA1	4
DU4475_BREAST	BREAST	DU4475	4
MCF7_BREAST	BREAST	MCF7	4
CAL51_BREAST	BREAST	CAL51	4
MDAMB134VI_BREAST	BREAST	MDAMB134VI	4
KPL1_BREAST	BREAST	KPL1	4
T98G_CENTRAL_NERVOUS_SYSTEM	CENTRAL_NERVOUS_SYSTEM	T98G	4
D283MED_CENTRAL_NERVOUS_SYSTEM	CENTRAL_NERVOUS_SYSTEM	D283MED	4
KNS42_CENTRAL_NERVOUS_SYSTEM	CENTRAL_NERVOUS_SYSTEM	KNS42	4
D341MED_CENTRAL_NERVOUS_SYSTEM	CENTRAL_NERVOUS_SYSTEM	D341MED	4
DAOY_CENTRAL_NERVOUS_SYSTEM	CENTRAL_NERVOUS_SYSTEM	DAOY	4
GB1_CENTRAL_NERVOUS_SYSTEM	CENTRAL_NERVOUS_SYSTEM	GB1	4
LN319_CENTRAL_NERVOUS_SYSTEM	CENTRAL_NERVOUS_SYSTEM	LN319	4
LNZ308_CENTRAL_NERVOUS_SYSTEM	CENTRAL_NERVOUS_SYSTEM	LNZ308	4
MFE280_ENDOMETRIUM	ENDOMETRIUM	MFE280	4
MFE296_ENDOMETRIUM	ENDOMETRIUM	MFE296	4
EN_ENDOMETRIUM	ENDOMETRIUM	EN	4
HEC1B_ENDOMETRIUM	ENDOMETRIUM	HEC1B	4
COLO684_ENDOMETRIUM	ENDOMETRIUM	COLO684	4
L1236_HAEMATOPOIETIC_AND_LYMPHOID_TISSUE	HAEMATOPOIETIC_AND_LYMPHOID_TISSUE	L1236	4
DB_HAEMATOPOIETIC_AND_LYMPHOID_TISSUE	HAEMATOPOIETIC_AND_LYMPHOID_TISSUE	DB	4
JM1_HAEMATOPOIETIC_AND_LYMPHOID_TISSUE	HAEMATOPOIETIC_AND_LYMPHOID_TISSUE	JM1	4
KMS28BM_HAEMATOPOIETIC_AND_LYMPHOID_TISSUE	HAEMATOPOIETIC_AND_LYMPHOID_TISSUE	KMS28BM	4
HEL9217_HAEMATOPOIETIC_AND_LYMPHOID_TISSUE	HAEMATOPOIETIC_AND_LYMPHOID_TISSUE	HEL9217	4
KMS11_HAEMATOPOIETIC_AND_LYMPHOID_TISSUE	HAEMATOPOIETIC_AND_LYMPHOID_TISSUE	KMS11	4
SUPT1_HAEMATOPOIETIC_AND_LYMPHOID_TISSUE	HAEMATOPOIETIC_AND_LYMPHOID_TISSUE	SUPT1	4
SKM1_HAEMATOPOIETIC_AND_LYMPHOID_TISSUE	HAEMATOPOIETIC_AND_LYMPHOID_TISSUE	SKM1	4
JURKAT_HAEMATOPOIETIC_AND_LYMPHOID_TISSUE	HAEMATOPOIETIC_AND_LYMPHOID_TISSUE	JURKAT	4
JJN3_HAEMATOPOIETIC_AND_LYMPHOID_TISSUE	HAEMATOPOIETIC_AND_LYMPHOID_TISSUE	JJN3	4
CMLT1_HAEMATOPOIETIC_AND_LYMPHOID_TISSUE	HAEMATOPOIETIC_AND_LYMPHOID_TISSUE	CMLT1	4
JURLMK1_HAEMATOPOIETIC_AND_LYMPHOID_TISSUE	HAEMATOPOIETIC_AND_LYMPHOID_TISSUE	JURLMK1	4
CMK_HAEMATOPOIETIC_AND_LYMPHOID_TISSUE	HAEMATOPOIETIC_AND_LYMPHOID_TISSUE	CMK	4
VMRCRCZ_KIDNEY	KIDNEY	VMRCRCZ	4
ACHN_KIDNEY	KIDNEY	ACHN	4
UMRC2_KIDNEY	KIDNEY	UMRC2	4
SW620_LARGE_INTESTINE	LARGE_INTESTINE	SW620	4
HCT116_LARGE_INTESTINE	LARGE_INTESTINE	HCT116	4
CCK81_LARGE_INTESTINE	LARGE_INTESTINE	CCK81	4
LOVO_LARGE_INTESTINE	LARGE_INTESTINE	LOVO	4
SW48_LARGE_INTESTINE	LARGE_INTESTINE	SW48	4
C2BBE1_LARGE_INTESTINE	LARGE_INTESTINE	C2BBE1	4
OUMS23_LARGE_INTESTINE	LARGE_INTESTINE	OUMS23	4
NCIH716_LARGE_INTESTINE	LARGE_INTESTINE	NCIH716	4
SW480_LARGE_INTESTINE	LARGE_INTESTINE	SW480	4
SNU1040_LARGE_INTESTINE	LARGE_INTESTINE	SNU1040	4
SNU398_LIVER	LIVER	SNU398	4
HUH7_LIVER	LIVER	HUH7	4
JHH7_LIVER	LIVER	JHH7	4
ALEXANDERCELLS_LIVER	LIVER	ALEXANDERCELLS	4
HEP3B217_LIVER	LIVER	HEP3B217	4
LI7_LIVER	LIVER	LI7	4
NCIH524_LUNG	LUNG	NCIH524	4
NCIH209_LUNG	LUNG	NCIH209	4
SBC5_LUNG	LUNG	SBC5	4
NCIH889_LUNG	LUNG	NCIH889	4
NCIH211_LUNG	LUNG	NCIH211	4
NCIH2171_LUNG	LUNG	NCIH2171	4
LK2_LUNG	LUNG	LK2	4
NCIH520_LUNG	LUNG	NCIH520	4
NCIH1963_LUNG	LUNG	NCIH1963	4
NCIH810_LUNG	LUNG	NCIH810	4
NCIH526_LUNG	LUNG	NCIH526	4
NCIH2196_LUNG	LUNG	NCIH2196	4
NCIH446_LUNG	LUNG	NCIH446	4
NCIH522_LUNG	LUNG	NCIH522	4
NCIH1155_LUNG	LUNG	NCIH1155	4
NCIH1703_LUNG	LUNG	NCIH1703	4
NCIH1581_LUNG	LUNG	NCIH1581	4
NCIH146_LUNG	LUNG	NCIH146	4
DMS79_LUNG	LUNG	DMS79	4
NCIH2106_LUNG	LUNG	NCIH2106	4
NCIH82_LUNG	LUNG	NCIH82	4
DMS53_LUNG	LUNG	DMS53	4
NCIH1694_LUNG	LUNG	NCIH1694	4
NCIH1184_LUNG	LUNG	NCIH1184	4
NCIH2227_LUNG	LUNG	NCIH2227	4
NCIH510_LUNG	LUNG	NCIH510	4
NCIH2066_LUNG	LUNG	NCIH2066	4
NCIH2029_LUNG	LUNG	NCIH2029	4
NCIH1651_LUNG	LUNG	NCIH1651	4
CPCN_LUNG	LUNG	CPCN	4
DMS153_LUNG	LUNG	DMS153	4
NCIH1048_LUNG	LUNG	NCIH1048	4
NCIH1618_LUNG	LUNG	NCIH1618	4
NCIH69_LUNG	LUNG	NCIH69	4
NCIH1930_LUNG	LUNG	NCIH1930	4
NCIH1836_LUNG	LUNG	NCIH1836	4
DMS114_LUNG	LUNG	DMS114	4
SCLC21H_LUNG	LUNG	SCLC21H	4
SHP77_LUNG	LUNG	SHP77	4
NCIH841_LUNG	LUNG	NCIH841	4
BEN_LUNG	LUNG	BEN	4
NCIH2141_LUNG	LUNG	NCIH2141	4
NCIH1385_LUNG	LUNG	NCIH1385	4
DMS454_LUNG	LUNG	DMS454	4
CORL47_LUNG	LUNG	CORL47	4
DMS273_LUNG	LUNG	DMS273	4
CORL311_LUNG	LUNG	CORL311	4
NCIH2081_LUNG	LUNG	NCIH2081	4
NCIH1092_LUNG	LUNG	NCIH1092	4
NCIH1105_LUNG	LUNG	NCIH1105	4
NCIH1436_LUNG	LUNG	NCIH1436	4
NCIH1876_LUNG	LUNG	NCIH1876	4
CORL24_LUNG	LUNG	CORL24	4
CORL88_LUNG	LUNG	CORL88	4
CORL95_LUNG	LUNG	CORL95	4
CORL51_LUNG	LUNG	CORL51	4
HCC33_LUNG	LUNG	HCC33	4
COLO668_LUNG	LUNG	COLO668	4
VMRCLCD_LUNG	LUNG	VMRCLCD	4
HCC1833_LUNG	LUNG	HCC1833	4
CORL279_LUNG	LUNG	CORL279	4
KYSE140_OESOPHAGUS	OESOPHAGUS	KYSE140	4
KYSE70_OESOPHAGUS	OESOPHAGUS	KYSE70	4
TE1_OESOPHAGUS	OESOPHAGUS	TE1	4
KYSE270_OESOPHAGUS	OESOPHAGUS	KYSE270	4
KYSE450_OESOPHAGUS	OESOPHAGUS	KYSE450	4
TE6_OESOPHAGUS	OESOPHAGUS	TE6	4
COLO704_OVARY	OVARY	COLO704	4
A2780_OVARY	OVARY	A2780	4
TOV21G_OVARY	OVARY	TOV21G	4
FUOV1_OVARY	OVARY	FUOV1	4
TOV112D_OVARY	OVARY	TOV112D	4
OC316_OVARY	OVARY	OC316	4
OC315_OVARY	OVARY	OC315	4
OC314_OVARY	OVARY	OC314	4
OAW42_OVARY	OVARY	OAW42	4
OVCAR8_OVARY	OVARY	OVCAR8	4
OVK18_OVARY	OVARY	OVK18	4
MIAPACA2_PANCREAS	PANCREAS	MIAPACA2	4
HUPT3_PANCREAS	PANCREAS	HUPT3	4
PATU8988T_PANCREAS	PANCREAS	PATU8988T	4
QGP1_PANCREAS	PANCREAS	QGP1	4
KP3_PANCREAS	PANCREAS	KP3	4
KP4_PANCREAS	PANCREAS	KP4	4
PATU8988S_PANCREAS	PANCREAS	PATU8988S	4
PANC1_PANCREAS	PANCREAS	PANC1	4
SUIT2_PANCREAS	PANCREAS	SUIT2	4
22RV1_PROSTATE	PROSTATE	22RV1	4
NCIH660_PROSTATE	PROSTATE	NCIH660	4
K029AX_SKIN	SKIN	K029AX	4
HS695T_SKIN	SKIN	HS695T	4
CHL1_SKIN	SKIN	CHL1	4
SKMEL3_SKIN	SKIN	SKMEL3	4
HMCB_SKIN	SKIN	HMCB	4
COLO679_SKIN	SKIN	COLO679	4
COLO800_SKIN	SKIN	COLO800	4
UACC62_SKIN	SKIN	UACC62	4
IGR37_SKIN	SKIN	IGR37	4
G361_SKIN	SKIN	G361	4
RVH421_SKIN	SKIN	RVH421	4
SKMEL1_SKIN	SKIN	SKMEL1	4
HT144_SKIN	SKIN	HT144	4
COLO783_SKIN	SKIN	COLO783	4
IGR39_SKIN	SKIN	IGR39	4
A204_SOFT_TISSUE	SOFT_TISSUE	A204	4
SJRH30_SOFT_TISSUE	SOFT_TISSUE	SJRH30	4
G401_SOFT_TISSUE	SOFT_TISSUE	G401	4
TE617T_SOFT_TISSUE	SOFT_TISSUE	TE617T	4
TE441T_SOFT_TISSUE	SOFT_TISSUE	TE441T	4
RH41_SOFT_TISSUE	SOFT_TISSUE	RH41	4
RH30_SOFT_TISSUE	SOFT_TISSUE	RH30	4
FU97_STOMACH	STOMACH	FU97	4
GCIY_STOMACH	STOMACH	GCIY	4
AZ521_STOMACH	STOMACH	AZ521	4
ECC10_STOMACH	STOMACH	ECC10	4
GSS_STOMACH	STOMACH	GSS	4
ECC12_STOMACH	STOMACH	ECC12	4
TT2609C02_THYROID	THYROID	TT2609C02	4
ML1_THYROID	THYROID	ML1	4
TT_THYROID	THYROID	TT	4
DETROIT562_UPPER_AERODIGESTIVE_TRACT	UPPER_AERODIGESTIVE_TRACT	DETROIT562	4
FADU_UPPER_AERODIGESTIVE_TRACT	UPPER_AERODIGESTIVE_TRACT	FADU	4
HSC2_UPPER_AERODIGESTIVE_TRACT	UPPER_AERODIGESTIVE_TRACT	HSC2	4
SNU46_UPPER_AERODIGESTIVE_TRACT	UPPER_AERODIGESTIVE_TRACT	SNU46	4
BICR18_UPPER_AERODIGESTIVE_TRACT	UPPER_AERODIGESTIVE_TRACT	BICR18	4
UMUC3_URINARY_TRACT	URINARY_TRACT	UMUC3	4
KU1919_URINARY_TRACT	URINARY_TRACT	KU1919	4
639V_URINARY_TRACT	URINARY_TRACT	639V	4
253J_URINARY_TRACT	URINARY_TRACT	253J	4
253JBV_URINARY_TRACT	URINARY_TRACT	253JBV	4
JMSU1_URINARY_TRACT	URINARY_TRACT	JMSU1	4
UBLC1_URINARY_TRACT	URINARY_TRACT	UBLC1	4
SW1353_BONE	BONE	SW1353	5
MDAMB468_BREAST	BREAST	MDAMB468	5
HCC1143_BREAST	BREAST	HCC1143	5
HCC1937_BREAST	BREAST	HCC1937	5
HCC1569_BREAST	BREAST	HCC1569	5
HCC1187_BREAST	BREAST	HCC1187	5
HMC18_BREAST	BREAST	HMC18	5
HCC2157_BREAST	BREAST	HCC2157	5
HCC38_BREAST	BREAST	HCC38	5
JIMT1_BREAST	BREAST	JIMT1	5
HCC1806_BREAST	BREAST	HCC1806	5
HCC1599_BREAST	BREAST	HCC1599	5
HDQP1_BREAST	BREAST	HDQP1	5
NOMO1_HAEMATOPOIETIC_AND_LYMPHOID_TISSUE	HAEMATOPOIETIC_AND_LYMPHOID_TISSUE	NOMO1	5
SUPT11_HAEMATOPOIETIC_AND_LYMPHOID_TISSUE	HAEMATOPOIETIC_AND_LYMPHOID_TISSUE	SUPT11	5
SW1417_LARGE_INTESTINE	LARGE_INTESTINE	SW1417	5
CL11_LARGE_INTESTINE	LARGE_INTESTINE	CL11	5
SW837_LARGE_INTESTINE	LARGE_INTESTINE	SW837	5
NCIH1299_LUNG	LUNG	NCIH1299	5
LU99_LUNG	LUNG	LU99	5
NCIH1693_LUNG	LUNG	NCIH1693	5
NCIH2405_LUNG	LUNG	NCIH2405	5
LC1F_LUNG	LUNG	LC1F	5
EFO21_OVARY	OVARY	EFO21	5
PANC1005_PANCREAS	PANCREAS	PANC1005	5
PATU8902_PANCREAS	PANCREAS	PATU8902	5
DU145_PROSTATE	PROSTATE	DU145	5
PRECLH_PROSTATE	PROSTATE	PRECLH	5
COLO829_SKIN	SKIN	COLO829	5
A375_SKIN	SKIN	A375	5
HS294T_SKIN	SKIN	HS294T	5
MKN74_STOMACH	STOMACH	MKN74	5
CAL62_THYROID	THYROID	CAL62	5
SCC4_UPPER_AERODIGESTIVE_TRACT	UPPER_AERODIGESTIVE_TRACT	SCC4	5
5637_URINARY_TRACT	URINARY_TRACT	5637	5
BC3C_URINARY_TRACT	URINARY_TRACT	BC3C	5
KELLY_AUTONOMIC_GANGLIA	AUTONOMIC_GANGLIA	KELLY	6
RDES_BONE	BONE	RDES	6
HOS_BONE	BONE	HOS	6
TC71_BONE	BONE	TC71	6
143B_BONE	BONE	143B	6
EFM192A_BREAST	BREAST	EFM192A	6
MDAMB453_BREAST	BREAST	MDAMB453	6
BT474_BREAST	BREAST	BT474	6
MDAMB361_BREAST	BREAST	MDAMB361	6
MDAMB175VII_BREAST	BREAST	MDAMB175VII	6
YMB1_BREAST	BREAST	YMB1	6
ZR751_BREAST	BREAST	ZR751	6
HCC202_BREAST	BREAST	HCC202	6
BT483_BREAST	BREAST	BT483	6
CAL148_BREAST	BREAST	CAL148	6
BCP1_HAEMATOPOIETIC_AND_LYMPHOID_TISSUE	HAEMATOPOIETIC_AND_LYMPHOID_TISSUE	BCP1	6
HH_HAEMATOPOIETIC_AND_LYMPHOID_TISSUE	HAEMATOPOIETIC_AND_LYMPHOID_TISSUE	HH	6
KMS21BM_HAEMATOPOIETIC_AND_LYMPHOID_TISSUE	HAEMATOPOIETIC_AND_LYMPHOID_TISSUE	KMS21BM	6
KMS27_HAEMATOPOIETIC_AND_LYMPHOID_TISSUE	HAEMATOPOIETIC_AND_LYMPHOID_TISSUE	KMS27	6
A3KAW_HAEMATOPOIETIC_AND_LYMPHOID_TISSUE	HAEMATOPOIETIC_AND_LYMPHOID_TISSUE	A3KAW	6
KMM1_HAEMATOPOIETIC_AND_LYMPHOID_TISSUE	HAEMATOPOIETIC_AND_LYMPHOID_TISSUE	KMM1	6
SUDHL1_HAEMATOPOIETIC_AND_LYMPHOID_TISSUE	HAEMATOPOIETIC_AND_LYMPHOID_TISSUE	SUDHL1	6
F36P_HAEMATOPOIETIC_AND_LYMPHOID_TISSUE	HAEMATOPOIETIC_AND_LYMPHOID_TISSUE	F36P	6
CAKI2_KIDNEY	KIDNEY	CAKI2	6
CAL54_KIDNEY	KIDNEY	CAL54	6
LS411N_LARGE_INTESTINE	LARGE_INTESTINE	LS411N	6
LS180_LARGE_INTESTINE	LARGE_INTESTINE	LS180	6
SW403_LARGE_INTESTINE	LARGE_INTESTINE	SW403	6
SW948_LARGE_INTESTINE	LARGE_INTESTINE	SW948	6
HCC56_LARGE_INTESTINE	LARGE_INTESTINE	HCC56	6
CL34_LARGE_INTESTINE	LARGE_INTESTINE	CL34	6
CW2_LARGE_INTESTINE	LARGE_INTESTINE	CW2	6
HT115_LARGE_INTESTINE	LARGE_INTESTINE	HT115	6
SNUC4_LARGE_INTESTINE	LARGE_INTESTINE	SNUC4	6
JHH5_LIVER	LIVER	JHH5	6
NCIH684_LIVER	LIVER	NCIH684	6
HUH6_LIVER	LIVER	HUH6	6
SNU761_LIVER	LIVER	SNU761	6
NCIH2170_LUNG	LUNG	NCIH2170	6
NCIH1395_LUNG	LUNG	NCIH1395	6
NCIH727_LUNG	LUNG	NCIH727	6
NCIH854_LUNG	LUNG	NCIH854	6
OE19_OESOPHAGUS	OESOPHAGUS	OE19	6
TE4_OESOPHAGUS	OESOPHAGUS	TE4	6
JHOM2B_OVARY	OVARY	JHOM2B	6
CAPAN1_PANCREAS	PANCREAS	CAPAN1	6
SU8686_PANCREAS	PANCREAS	SU8686	6
COLO849_SKIN	SKIN	COLO849	6
HS936T_SKIN	SKIN	HS936T	6
SKUT1_SOFT_TISSUE	SOFT_TISSUE	SKUT1	6
IM95_STOMACH	STOMACH	IM95	6
SNU16_STOMACH	STOMACH	SNU16	6
HUG1N_STOMACH	STOMACH	HUG1N	6
2313287_STOMACH	STOMACH	2313287	6
TGBC11TKB_STOMACH	STOMACH	TGBC11TKB	6
SNU520_STOMACH	STOMACH	SNU520	6
SNU620_STOMACH	STOMACH	SNU620	6
GSU_STOMACH	STOMACH	GSU	6
PECAPJ15_UPPER_AERODIGESTIVE_TRACT	UPPER_AERODIGESTIVE_TRACT	PECAPJ15	6
SNU899_UPPER_AERODIGESTIVE_TRACT	UPPER_AERODIGESTIVE_TRACT	SNU899	6
CHP212_AUTONOMIC_GANGLIA	AUTONOMIC_GANGLIA	CHP212	7
KPNSI9S_AUTONOMIC_GANGLIA	AUTONOMIC_GANGLIA	KPNSI9S	7
SKNSH_AUTONOMIC_GANGLIA	AUTONOMIC_GANGLIA	SKNSH	7
NH6_AUTONOMIC_GANGLIA	AUTONOMIC_GANGLIA	NH6	7
HUCCT1_BILIARY_TRACT	BILIARY_TRACT	HUCCT1	7
SAOS2_BONE	BONE	SAOS2	7
OUMS27_BONE	BONE	OUMS27	7
HS822T_BONE	BONE	HS822T	7
G292CLONEA141B1_BONE	BONE	G292CLONEA141B1	7
HS737T_BONE	BONE	HS737T	7
HS863T_BONE	BONE	HS863T	7
HS821T_BONE	BONE	HS821T	7
CAL78_BONE	BONE	CAL78	7
MDAMB231_BREAST	BREAST	MDAMB231	7
HS606T_BREAST	BREAST	HS606T	7
HS578T_BREAST	BREAST	HS578T	7
MDAMB436_BREAST	BREAST	MDAMB436	7
HCC1395_BREAST	BREAST	HCC1395	7
HS739T_BREAST	BREAST	HS739T	7
MDAMB157_BREAST	BREAST	MDAMB157	7
HS281T_BREAST	BREAST	HS281T	7
HS343T_BREAST	BREAST	HS343T	7
CAL120_BREAST	BREAST	CAL120	7
HS742T_BREAST	BREAST	HS742T	7
DBTRG05MG_CENTRAL_NERVOUS_SYSTEM	CENTRAL_NERVOUS_SYSTEM	DBTRG05MG	7
A172_CENTRAL_NERVOUS_SYSTEM	CENTRAL_NERVOUS_SYSTEM	A172	7
M059K_CENTRAL_NERVOUS_SYSTEM	CENTRAL_NERVOUS_SYSTEM	M059K	7
MOGGCCM_CENTRAL_NERVOUS_SYSTEM	CENTRAL_NERVOUS_SYSTEM	MOGGCCM	7
42MGBA_CENTRAL_NERVOUS_SYSTEM	CENTRAL_NERVOUS_SYSTEM	42MGBA	7
KS1_CENTRAL_NERVOUS_SYSTEM	CENTRAL_NERVOUS_SYSTEM	KS1	7
MOGGUVW_CENTRAL_NERVOUS_SYSTEM	CENTRAL_NERVOUS_SYSTEM	MOGGUVW	7
NMCG1_CENTRAL_NERVOUS_SYSTEM	CENTRAL_NERVOUS_SYSTEM	NMCG1	7
YH13_CENTRAL_NERVOUS_SYSTEM	CENTRAL_NERVOUS_SYSTEM	YH13	7
KNS60_CENTRAL_NERVOUS_SYSTEM	CENTRAL_NERVOUS_SYSTEM	KNS60	7
CAS1_CENTRAL_NERVOUS_SYSTEM	CENTRAL_NERVOUS_SYSTEM	CAS1	7
BECKER_CENTRAL_NERVOUS_SYSTEM	CENTRAL_NERVOUS_SYSTEM	BECKER	7
SW1783_CENTRAL_NERVOUS_SYSTEM	CENTRAL_NERVOUS_SYSTEM	SW1783	7
HS683_CENTRAL_NERVOUS_SYSTEM	CENTRAL_NERVOUS_SYSTEM	HS683	7
SNU1105_CENTRAL_NERVOUS_SYSTEM	CENTRAL_NERVOUS_SYSTEM	SNU1105	7
TM31_CENTRAL_NERVOUS_SYSTEM	CENTRAL_NERVOUS_SYSTEM	TM31	7
U138MG_CENTRAL_NERVOUS_SYSTEM	CENTRAL_NERVOUS_SYSTEM	U138MG	7
U118MG_CENTRAL_NERVOUS_SYSTEM	CENTRAL_NERVOUS_SYSTEM	U118MG	7
SNU489_CENTRAL_NERVOUS_SYSTEM	CENTRAL_NERVOUS_SYSTEM	SNU489	7
LN235_CENTRAL_NERVOUS_SYSTEM	CENTRAL_NERVOUS_SYSTEM	LN235	7
U178_CENTRAL_NERVOUS_SYSTEM	CENTRAL_NERVOUS_SYSTEM	U178	7
ESS1_ENDOMETRIUM	ENDOMETRIUM	ESS1	7
JHUEM2_ENDOMETRIUM	ENDOMETRIUM	JHUEM2	7
HEC50B_ENDOMETRIUM	ENDOMETRIUM	HEC50B	7
SNU1077_ENDOMETRIUM	ENDOMETRIUM	SNU1077	7
JHUEM3_ENDOMETRIUM	ENDOMETRIUM	JHUEM3	7
SNU685_ENDOMETRIUM	ENDOMETRIUM	SNU685	7
HDMYZ_HAEMATOPOIETIC_AND_LYMPHOID_TISSUE	HAEMATOPOIETIC_AND_LYMPHOID_TISSUE	HDMYZ	7
HS604T_HAEMATOPOIETIC_AND_LYMPHOID_TISSUE	HAEMATOPOIETIC_AND_LYMPHOID_TISSUE	HS604T	7
TO175T_HAEMATOPOIETIC_AND_LYMPHOID_TISSUE	HAEMATOPOIETIC_AND_LYMPHOID_TISSUE	TO175T	7
HS616T_HAEMATOPOIETIC_AND_LYMPHOID_TISSUE	HAEMATOPOIETIC_AND_LYMPHOID_TISSUE	HS616T	7
REH_HAEMATOPOIETIC_AND_LYMPHOID_TISSUE	HAEMATOPOIETIC_AND_LYMPHOID_TISSUE	REH	7
KCL22_HAEMATOPOIETIC_AND_LYMPHOID_TISSUE	HAEMATOPOIETIC_AND_LYMPHOID_TISSUE	KCL22	7
KMH2_HAEMATOPOIETIC_AND_LYMPHOID_TISSUE	HAEMATOPOIETIC_AND_LYMPHOID_TISSUE	KMH2	7
OCIM1_HAEMATOPOIETIC_AND_LYMPHOID_TISSUE	HAEMATOPOIETIC_AND_LYMPHOID_TISSUE	OCIM1	7
MONOMAC6_HAEMATOPOIETIC_AND_LYMPHOID_TISSUE	HAEMATOPOIETIC_AND_LYMPHOID_TISSUE	MONOMAC6	7
OCIAML3_HAEMATOPOIETIC_AND_LYMPHOID_TISSUE	HAEMATOPOIETIC_AND_LYMPHOID_TISSUE	OCIAML3	7
HS751T_HAEMATOPOIETIC_AND_LYMPHOID_TISSUE	HAEMATOPOIETIC_AND_LYMPHOID_TISSUE	HS751T	7
HTK_HAEMATOPOIETIC_AND_LYMPHOID_TISSUE	HAEMATOPOIETIC_AND_LYMPHOID_TISSUE	HTK	7
786O_KIDNEY	KIDNEY	786O	7
KMRC2_KIDNEY	KIDNEY	KMRC2	7
KMRC1_KIDNEY	KIDNEY	KMRC1	7
BFTC909_KIDNEY	KIDNEY	BFTC909	7
TUHR4TKB_KIDNEY	KIDNEY	TUHR4TKB	7
OSRC2_KIDNEY	KIDNEY	OSRC2	7
SNU1272_KIDNEY	KIDNEY	SNU1272	7
SNU349_KIDNEY	KIDNEY	SNU349	7
HEKTE_KIDNEY	KIDNEY	HEKTE	7
HS698T_LARGE_INTESTINE	LARGE_INTESTINE	HS698T	7
MDST8_LARGE_INTESTINE	LARGE_INTESTINE	MDST8	7
HLF_LIVER	LIVER	HLF	7
JHH4_LIVER	LIVER	JHH4	7
JHH2_LIVER	LIVER	JHH2	7
SNU182_LIVER	LIVER	SNU182	7
SNU423_LIVER	LIVER	SNU423	7
SNU387_LIVER	LIVER	SNU387	7
SNU475_LIVER	LIVER	SNU475	7
JHH6_LIVER	LIVER	JHH6	7
SKHEP1_LIVER	LIVER	SKHEP1	7
SNU886_LIVER	LIVER	SNU886	7
NCIH196_LUNG	LUNG	NCIH196	7
LOUNH91_LUNG	LUNG	LOUNH91	7
RERFLCSQ1_LUNG	LUNG	RERFLCSQ1	7
NCIH2030_LUNG	LUNG	NCIH2030	7
RERFLCAI_LUNG	LUNG	RERFLCAI	7
RERFLCMS_LUNG	LUNG	RERFLCMS	7
CALU1_LUNG	LUNG	CALU1	7
NCIH661_LUNG	LUNG	NCIH661	7
SW1271_LUNG	LUNG	SW1271	7
NCIH1792_LUNG	LUNG	NCIH1792	7
IALM_LUNG	LUNG	IALM	7
NCIH2085_LUNG	LUNG	NCIH2085	7
NCIH226_LUNG	LUNG	NCIH226	7
NCIH1734_LUNG	LUNG	NCIH1734	7
HS618T_LUNG	LUNG	HS618T	7
HS229T_LUNG	LUNG	HS229T	7
NCIH1755_LUNG	LUNG	NCIH1755	7
LCLC103H_LUNG	LUNG	LCLC103H	7
LXF289_LUNG	LUNG	LXF289	7
HCC2108_LUNG	LUNG	HCC2108	7
HCC1359_LUNG	LUNG	HCC1359	7
NCIH2286_LUNG	LUNG	NCIH2286	7
NCIH1339_LUNG	LUNG	NCIH1339	7
SW1573_LUNG	LUNG	SW1573	7
NCIH1915_LUNG	LUNG	NCIH1915	7
HCC2279_LUNG	LUNG	HCC2279	7
HLC1_LUNG	LUNG	HLC1	7
NCIH838_LUNG	LUNG	NCIH838	7
HCC1171_LUNG	LUNG	HCC1171	7
TIG3TD_LUNG	LUNG	TIG3TD	7
KYSE520_OESOPHAGUS	OESOPHAGUS	KYSE520	7
TE8_OESOPHAGUS	OESOPHAGUS	TE8	7
HEYA8_OVARY	OVARY	HEYA8	7
ES2_OVARY	OVARY	ES2	7
SKOV3_OVARY	OVARY	SKOV3	7
COV504_OVARY	OVARY	COV504	7
OV7_OVARY	OVARY	OV7	7
JHOM1_OVARY	OVARY	JHOM1	7
JHOC5_OVARY	OVARY	JHOC5	7
59M_OVARY	OVARY	59M	7
OELE_OVARY	OVARY	OELE	7
DANG_PANCREAS	PANCREAS	DANG	7
PSN1_PANCREAS	PANCREAS	PSN1	7
NCIH2052_PLEURA	PLEURA	NCIH2052	7
MPP89_PLEURA	PLEURA	MPP89	7
RS5_PLEURA	PLEURA	RS5	7
DM3_PLEURA	PLEURA	DM3	7
JL1_PLEURA	PLEURA	JL1	7
PC3_PROSTATE	PROSTATE	PC3	7
SKMEL24_SKIN	SKIN	SKMEL24	7
WM115_SKIN	SKIN	WM115	7
WM2664_SKIN	SKIN	WM2664	7
HS940T_SKIN	SKIN	HS940T	7
HS939T_SKIN	SKIN	HS939T	7
HS688AT_SKIN	SKIN	HS688AT	7
HS600T_SKIN	SKIN	HS600T	7
HS934T_SKIN	SKIN	HS934T	7
HS834T_SKIN	SKIN	HS834T	7
RPMI7951_SKIN	SKIN	RPMI7951	7
WM793_SKIN	SKIN	WM793	7
WM1799_SKIN	SKIN	WM1799	7
SH4_SKIN	SKIN	SH4	7
A2058_SKIN	SKIN	A2058	7
HS729_SOFT_TISSUE	SOFT_TISSUE	HS729	7
SKLMS1_SOFT_TISSUE	SOFT_TISSUE	SKLMS1	7
RH18_SOFT_TISSUE	SOFT_TISSUE	RH18	7
RD_SOFT_TISSUE	SOFT_TISSUE	RD	7
TE125T_SOFT_TISSUE	SOFT_TISSUE	TE125T	7
MKN1_STOMACH	STOMACH	MKN1	7
RERFGC1B_STOMACH	STOMACH	RERFGC1B	7
HS746T_STOMACH	STOMACH	HS746T	7
MKN7_STOMACH	STOMACH	MKN7	7
LMSU_STOMACH	STOMACH	LMSU	7
SW579_THYROID	THYROID	SW579	7
8305C_THYROID	THYROID	8305C	7
CGTHW1_THYROID	THYROID	CGTHW1	7
SCC25_UPPER_AERODIGESTIVE_TRACT	UPPER_AERODIGESTIVE_TRACT	SCC25	7
SCC15_UPPER_AERODIGESTIVE_TRACT	UPPER_AERODIGESTIVE_TRACT	SCC15	7
YD8_UPPER_AERODIGESTIVE_TRACT	UPPER_AERODIGESTIVE_TRACT	YD8	7
YD10B_UPPER_AERODIGESTIVE_TRACT	UPPER_AERODIGESTIVE_TRACT	YD10B	7
T24_URINARY_TRACT	URINARY_TRACT	T24	7
647V_URINARY_TRACT	URINARY_TRACT	647V	7
TCCSUP_URINARY_TRACT	URINARY_TRACT	TCCSUP	7
HUH28_BILIARY_TRACT	BILIARY_TRACT	HUH28	8
T173_BONE	BONE	T173	8
HS819T_BONE	BONE	HS819T	8
HS888T_BONE	BONE	HS888T	8
BT549_BREAST	BREAST	BT549	8
HS274T_BREAST	BREAST	HS274T	8
GI1_CENTRAL_NERVOUS_SYSTEM	CENTRAL_NERVOUS_SYSTEM	GI1	8
YKG1_CENTRAL_NERVOUS_SYSTEM	CENTRAL_NERVOUS_SYSTEM	YKG1	8
KNS81_CENTRAL_NERVOUS_SYSTEM	CENTRAL_NERVOUS_SYSTEM	KNS81	8
LN229_CENTRAL_NERVOUS_SYSTEM	CENTRAL_NERVOUS_SYSTEM	LN229	8
CCFSTTG1_CENTRAL_NERVOUS_SYSTEM	CENTRAL_NERVOUS_SYSTEM	CCFSTTG1	8
DKMG_CENTRAL_NERVOUS_SYSTEM	CENTRAL_NERVOUS_SYSTEM	DKMG	8
SNU201_CENTRAL_NERVOUS_SYSTEM	CENTRAL_NERVOUS_SYSTEM	SNU201	8
SNU466_CENTRAL_NERVOUS_SYSTEM	CENTRAL_NERVOUS_SYSTEM	SNU466	8
SNU626_CENTRAL_NERVOUS_SYSTEM	CENTRAL_NERVOUS_SYSTEM	SNU626	8
AN3CA_ENDOMETRIUM	ENDOMETRIUM	AN3CA	8
RS411_HAEMATOPOIETIC_AND_LYMPHOID_TISSUE	HAEMATOPOIETIC_AND_LYMPHOID_TISSUE	RS411	8
SEM_HAEMATOPOIETIC_AND_LYMPHOID_TISSUE	HAEMATOPOIETIC_AND_LYMPHOID_TISSUE	SEM	8
GA10_HAEMATOPOIETIC_AND_LYMPHOID_TISSUE	HAEMATOPOIETIC_AND_LYMPHOID_TISSUE	GA10	8
THP1_HAEMATOPOIETIC_AND_LYMPHOID_TISSUE	HAEMATOPOIETIC_AND_LYMPHOID_TISSUE	THP1	8
SUPB15_HAEMATOPOIETIC_AND_LYMPHOID_TISSUE	HAEMATOPOIETIC_AND_LYMPHOID_TISSUE	SUPB15	8
LOUCY_HAEMATOPOIETIC_AND_LYMPHOID_TISSUE	HAEMATOPOIETIC_AND_LYMPHOID_TISSUE	LOUCY	8
RPMI8402_HAEMATOPOIETIC_AND_LYMPHOID_TISSUE	HAEMATOPOIETIC_AND_LYMPHOID_TISSUE	RPMI8402	8
P12ICHIKAWA_HAEMATOPOIETIC_AND_LYMPHOID_TISSUE	HAEMATOPOIETIC_AND_LYMPHOID_TISSUE	P12ICHIKAWA	8
OPM2_HAEMATOPOIETIC_AND_LYMPHOID_TISSUE	HAEMATOPOIETIC_AND_LYMPHOID_TISSUE	OPM2	8
697_HAEMATOPOIETIC_AND_LYMPHOID_TISSUE	HAEMATOPOIETIC_AND_LYMPHOID_TISSUE	697	8
RCHACV_HAEMATOPOIETIC_AND_LYMPHOID_TISSUE	HAEMATOPOIETIC_AND_LYMPHOID_TISSUE	RCHACV	8
MOLM16_HAEMATOPOIETIC_AND_LYMPHOID_TISSUE	HAEMATOPOIETIC_AND_LYMPHOID_TISSUE	MOLM16	8
KASUMI2_HAEMATOPOIETIC_AND_LYMPHOID_TISSUE	HAEMATOPOIETIC_AND_LYMPHOID_TISSUE	KASUMI2	8
SKMM2_HAEMATOPOIETIC_AND_LYMPHOID_TISSUE	HAEMATOPOIETIC_AND_LYMPHOID_TISSUE	SKMM2	8
NALM6_HAEMATOPOIETIC_AND_LYMPHOID_TISSUE	HAEMATOPOIETIC_AND_LYMPHOID_TISSUE	NALM6	8
LP1_HAEMATOPOIETIC_AND_LYMPHOID_TISSUE	HAEMATOPOIETIC_AND_LYMPHOID_TISSUE	LP1	8
NALM1_HAEMATOPOIETIC_AND_LYMPHOID_TISSUE	HAEMATOPOIETIC_AND_LYMPHOID_TISSUE	NALM1	8
MHHCALL3_HAEMATOPOIETIC_AND_LYMPHOID_TISSUE	HAEMATOPOIETIC_AND_LYMPHOID_TISSUE	MHHCALL3	8
CMK86_HAEMATOPOIETIC_AND_LYMPHOID_TISSUE	HAEMATOPOIETIC_AND_LYMPHOID_TISSUE	CMK86	8
KMRC20_KIDNEY	KIDNEY	KMRC20	8
KMRC3_KIDNEY	KIDNEY	KMRC3	8
HCT15_LARGE_INTESTINE	LARGE_INTESTINE	HCT15	8
KM12_LARGE_INTESTINE	LARGE_INTESTINE	KM12	8
DLD1_LARGE_INTESTINE	LARGE_INTESTINE	DLD1	8
HS675T_LARGE_INTESTINE	LARGE_INTESTINE	HS675T	8
RKO_LARGE_INTESTINE	LARGE_INTESTINE	RKO	8
SNUC1_LARGE_INTESTINE	LARGE_INTESTINE	SNUC1	8
COLO320_LARGE_INTESTINE	LARGE_INTESTINE	COLO320	8
HS255T_LARGE_INTESTINE	LARGE_INTESTINE	HS255T	8
SNU175_LARGE_INTESTINE	LARGE_INTESTINE	SNU175	8
SNU449_LIVER	LIVER	SNU449	8
HLE_LIVER	LIVER	HLE	8
A549_LUNG	LUNG	A549	8
CALU6_LUNG	LUNG	CALU6	8
NCIH460_LUNG	LUNG	NCIH460	8
HLFA_LUNG	LUNG	HLFA	8
NCIH1563_LUNG	LUNG	NCIH1563	8
NCIH23_LUNG	LUNG	NCIH23	8
NCIH2172_LUNG	LUNG	NCIH2172	8
KYSE180_OESOPHAGUS	OESOPHAGUS	KYSE180	8
KYSE150_OESOPHAGUS	OESOPHAGUS	KYSE150	8
TE10_OESOPHAGUS	OESOPHAGUS	TE10	8
IGROV1_OVARY	OVARY	IGROV1	8
HS571T_OVARY	OVARY	HS571T	8
OVTOKO_OVARY	OVARY	OVTOKO	8
COV318_OVARY	OVARY	COV318	8
COV362_OVARY	OVARY	COV362	8
COV434_OVARY	OVARY	COV434	8
HS766T_PANCREAS	PANCREAS	HS766T	8
TCCPAN2_PANCREAS	PANCREAS	TCCPAN2	8
KCIMOH1_PANCREAS	PANCREAS	KCIMOH1	8
PL45_PANCREAS	PANCREAS	PL45	8
SW1990_PANCREAS	PANCREAS	SW1990	8
SNU410_PANCREAS	PANCREAS	SNU410	8
PK45H_PANCREAS	PANCREAS	PK45H	8
PANC0203_PANCREAS	PANCREAS	PANC0203	8
HS895T_SKIN	SKIN	HS895T	8
SKMEL31_SKIN	SKIN	SKMEL31	8
HS839T_SKIN	SKIN	HS839T	8
HS852T_SKIN	SKIN	HS852T	8
COLO818_SKIN	SKIN	COLO818	8
BJHTERT_SKIN	SKIN	BJHTERT	8
TE159T_SOFT_TISSUE	SOFT_TISSUE	TE159T	8
SH10TC_STOMACH	STOMACH	SH10TC	8
KE39_STOMACH	STOMACH	KE39	8
HGC27_STOMACH	STOMACH	HGC27	8
SNU1_STOMACH	STOMACH	SNU1	8
SNU216_STOMACH	STOMACH	SNU216	8
SNU668_STOMACH	STOMACH	SNU668	8
FTC133_THYROID	THYROID	FTC133	8
HSC3_UPPER_AERODIGESTIVE_TRACT	UPPER_AERODIGESTIVE_TRACT	HSC3	8
HS840T_UPPER_AERODIGESTIVE_TRACT	UPPER_AERODIGESTIVE_TRACT	HS840T	8
PECAPJ41CLONED2_UPPER_AERODIGESTIVE_TRACT	UPPER_AERODIGESTIVE_TRACT	PECAPJ41CLONED2	8
YD38_UPPER_AERODIGESTIVE_TRACT	UPPER_AERODIGESTIVE_TRACT	YD38	8
BICR16_UPPER_AERODIGESTIVE_TRACT	UPPER_AERODIGESTIVE_TRACT	BICR16	8
J82_URINARY_TRACT	URINARY_TRACT	J82	8
SW1710_URINARY_TRACT	URINARY_TRACT	SW1710	8
HS172T_URINARY_TRACT	URINARY_TRACT	HS172T	8
SKNBE2_AUTONOMIC_GANGLIA	AUTONOMIC_GANGLIA	SKNBE2	9
SNU308_BILIARY_TRACT	BILIARY_TRACT	SNU308	9
U2OS_BONE	BONE	U2OS	9
MG63_BONE	BONE	MG63	9
SKBR3_BREAST	BREAST	SKBR3	9
HCC70_BREAST	BREAST	HCC70	9
ONS76_CENTRAL_NERVOUS_SYSTEM	CENTRAL_NERVOUS_SYSTEM	ONS76	9
SF767_CENTRAL_NERVOUS_SYSTEM	CENTRAL_NERVOUS_SYSTEM	SF767	9
RL952_ENDOMETRIUM	ENDOMETRIUM	RL952	9
JHUEM1_ENDOMETRIUM	ENDOMETRIUM	JHUEM1	9
HEC251_ENDOMETRIUM	ENDOMETRIUM	HEC251	9
KLE_ENDOMETRIUM	ENDOMETRIUM	KLE	9
HL60_HAEMATOPOIETIC_AND_LYMPHOID_TISSUE	HAEMATOPOIETIC_AND_LYMPHOID_TISSUE	HL60	9
RPMI8226_HAEMATOPOIETIC_AND_LYMPHOID_TISSUE	HAEMATOPOIETIC_AND_LYMPHOID_TISSUE	RPMI8226	9
KIJK_HAEMATOPOIETIC_AND_LYMPHOID_TISSUE	HAEMATOPOIETIC_AND_LYMPHOID_TISSUE	KIJK	9
MEG01_HAEMATOPOIETIC_AND_LYMPHOID_TISSUE	HAEMATOPOIETIC_AND_LYMPHOID_TISSUE	MEG01	9
KU812_HAEMATOPOIETIC_AND_LYMPHOID_TISSUE	HAEMATOPOIETIC_AND_LYMPHOID_TISSUE	KU812	9
A498_KIDNEY	KIDNEY	A498	9
RCC10RGB_KIDNEY	KIDNEY	RCC10RGB	9
SNUC2A_LARGE_INTESTINE	LARGE_INTESTINE	SNUC2A	9
COLO678_LARGE_INTESTINE	LARGE_INTESTINE	COLO678	9
SKCO1_LARGE_INTESTINE	LARGE_INTESTINE	SKCO1	9
SNU407_LARGE_INTESTINE	LARGE_INTESTINE	SNU407	9
SNU503_LARGE_INTESTINE	LARGE_INTESTINE	SNU503	9
SNU1033_LARGE_INTESTINE	LARGE_INTESTINE	SNU1033	9
SNUC5_LARGE_INTESTINE	LARGE_INTESTINE	SNUC5	9
SNU81_LARGE_INTESTINE	LARGE_INTESTINE	SNU81	9
JHH1_LIVER	LIVER	JHH1	9
NCIH2122_LUNG	LUNG	NCIH2122	9
PC14_LUNG	LUNG	PC14	9
ABC1_LUNG	LUNG	ABC1	9
NCIH1781_LUNG	LUNG	NCIH1781	9
HARA_LUNG	LUNG	HARA	9
NCIH1568_LUNG	LUNG	NCIH1568	9
NCIH1650_LUNG	LUNG	NCIH1650	9
KNS62_LUNG	LUNG	KNS62	9
CAL12T_LUNG	LUNG	CAL12T	9
LUDLU1_LUNG	LUNG	LUDLU1	9
NCIH1341_LUNG	LUNG	NCIH1341	9
NCIH1573_LUNG	LUNG	NCIH1573	9
NCIH1666_LUNG	LUNG	NCIH1666	9
RERFLCKJ_LUNG	LUNG	RERFLCKJ	9
NCIH1435_LUNG	LUNG	NCIH1435	9
HCC4006_LUNG	LUNG	HCC4006	9
HCC2935_LUNG	LUNG	HCC2935	9
NCIH2126_LUNG	LUNG	NCIH2126	9
HCC95_LUNG	LUNG	HCC95	9
LC1SQSF_LUNG	LUNG	LC1SQSF	9
VMRCLCP_LUNG	LUNG	VMRCLCP	9
HCC1588_LUNG	LUNG	HCC1588	9
NCIH292_LUNG	LUNG	NCIH292	9
NCIH3255_LUNG	LUNG	NCIH3255	9
TE15_OESOPHAGUS	OESOPHAGUS	TE15	9
TE9_OESOPHAGUS	OESOPHAGUS	TE9	9
TT_OESOPHAGUS	OESOPHAGUS	TT	9
TE14_OESOPHAGUS	OESOPHAGUS	TE14	9
CAOV3_OVARY	OVARY	CAOV3	9
OVCAR4_OVARY	OVARY	OVCAR4	9
OVISE_OVARY	OVARY	OVISE	9
OVKATE_OVARY	OVARY	OVKATE	9
NIHOVCAR3_OVARY	OVARY	NIHOVCAR3	9
CAOV4_OVARY	OVARY	CAOV4	9
JHOS4_OVARY	OVARY	JHOS4	9
RMUGS_OVARY	OVARY	RMUGS	9
JHOS2_OVARY	OVARY	JHOS2	9
ONCODG1_OVARY	OVARY	ONCODG1	9
COV644_OVARY	OVARY	COV644	9
OAW28_OVARY	OVARY	OAW28	9
SNU119_OVARY	OVARY	SNU119	9
CAPAN2_PANCREAS	PANCREAS	CAPAN2	9
L33_PANCREAS	PANCREAS	L33	9
KP2_PANCREAS	PANCREAS	KP2	9
HUPT4_PANCREAS	PANCREAS	HUPT4	9
PANC0403_PANCREAS	PANCREAS	PANC0403	9
PK1_PANCREAS	PANCREAS	PK1	9
PANC0504_PANCREAS	PANCREAS	PANC0504	9
T3M4_PANCREAS	PANCREAS	T3M4	9
HPAC_PANCREAS	PANCREAS	HPAC	9
ISTMES1_PLEURA	PLEURA	ISTMES1	9
MDAPCA2B_PROSTATE	PROSTATE	MDAPCA2B	9
CJM_SKIN	SKIN	CJM	9
NCIN87_STOMACH	STOMACH	NCIN87	9
NUGC2_STOMACH	STOMACH	NUGC2	9
NCCSTCK140_STOMACH	STOMACH	NCCSTCK140	9
8505C_THYROID	THYROID	8505C	9
SCC9_UPPER_AERODIGESTIVE_TRACT	UPPER_AERODIGESTIVE_TRACT	SCC9	9
SNU1214_UPPER_AERODIGESTIVE_TRACT	UPPER_AERODIGESTIVE_TRACT	SNU1214	9
HT1376_URINARY_TRACT	URINARY_TRACT	HT1376	9
RT112_URINARY_TRACT	URINARY_TRACT	RT112	9
KMBC2_URINARY_TRACT	URINARY_TRACT	KMBC2	9
BFTC905_URINARY_TRACT	URINARY_TRACT	BFTC905	9
VMCUB1_URINARY_TRACT	URINARY_TRACT	VMCUB1	9
CAL29_URINARY_TRACT	URINARY_TRACT	CAL29	9
RT11284_URINARY_TRACT	URINARY_TRACT	RT11284	9
SNU478_BILIARY_TRACT	BILIARY_TRACT	SNU478	10
HS706T_BONE	BONE	HS706T	10
CAL851_BREAST	BREAST	CAL851	10
HCC1954_BREAST	BREAST	HCC1954	10
LN18_CENTRAL_NERVOUS_SYSTEM	CENTRAL_NERVOUS_SYSTEM	LN18	10
SF295_CENTRAL_NERVOUS_SYSTEM	CENTRAL_NERVOUS_SYSTEM	SF295	10
U87MG_CENTRAL_NERVOUS_SYSTEM	CENTRAL_NERVOUS_SYSTEM	U87MG	10
GMS10_CENTRAL_NERVOUS_SYSTEM	CENTRAL_NERVOUS_SYSTEM	GMS10	10
GAMG_CENTRAL_NERVOUS_SYSTEM	CENTRAL_NERVOUS_SYSTEM	GAMG	10
8MGBA_CENTRAL_NERVOUS_SYSTEM	CENTRAL_NERVOUS_SYSTEM	8MGBA	10
H4_CENTRAL_NERVOUS_SYSTEM	CENTRAL_NERVOUS_SYSTEM	H4	10
KG1C_CENTRAL_NERVOUS_SYSTEM	CENTRAL_NERVOUS_SYSTEM	KG1C	10
KALS1_CENTRAL_NERVOUS_SYSTEM	CENTRAL_NERVOUS_SYSTEM	KALS1	10
AM38_CENTRAL_NERVOUS_SYSTEM	CENTRAL_NERVOUS_SYSTEM	AM38	10
SF126_CENTRAL_NERVOUS_SYSTEM	CENTRAL_NERVOUS_SYSTEM	SF126	10
EFE184_ENDOMETRIUM	ENDOMETRIUM	EFE184	10
TEN_ENDOMETRIUM	ENDOMETRIUM	TEN	10
HEC265_ENDOMETRIUM	ENDOMETRIUM	HEC265	10
HEC6_ENDOMETRIUM	ENDOMETRIUM	HEC6	10
MJ_HAEMATOPOIETIC_AND_LYMPHOID_TISSUE	HAEMATOPOIETIC_AND_LYMPHOID_TISSUE	MJ	10
A4FUK_HAEMATOPOIETIC_AND_LYMPHOID_TISSUE	HAEMATOPOIETIC_AND_LYMPHOID_TISSUE	A4FUK	10
HUT78_HAEMATOPOIETIC_AND_LYMPHOID_TISSUE	HAEMATOPOIETIC_AND_LYMPHOID_TISSUE	HUT78	10
AML193_HAEMATOPOIETIC_AND_LYMPHOID_TISSUE	HAEMATOPOIETIC_AND_LYMPHOID_TISSUE	AML193	10
P31FUJ_HAEMATOPOIETIC_AND_LYMPHOID_TISSUE	HAEMATOPOIETIC_AND_LYMPHOID_TISSUE	P31FUJ	10
HUT102_HAEMATOPOIETIC_AND_LYMPHOID_TISSUE	HAEMATOPOIETIC_AND_LYMPHOID_TISSUE	HUT102	10
DEL_HAEMATOPOIETIC_AND_LYMPHOID_TISSUE	HAEMATOPOIETIC_AND_LYMPHOID_TISSUE	DEL	10
EM2_HAEMATOPOIETIC_AND_LYMPHOID_TISSUE	HAEMATOPOIETIC_AND_LYMPHOID_TISSUE	EM2	10
COLO677_HAEMATOPOIETIC_AND_LYMPHOID_TISSUE	HAEMATOPOIETIC_AND_LYMPHOID_TISSUE	COLO677	10
M07E_HAEMATOPOIETIC_AND_LYMPHOID_TISSUE	HAEMATOPOIETIC_AND_LYMPHOID_TISSUE	M07E	10
L428_HAEMATOPOIETIC_AND_LYMPHOID_TISSUE	HAEMATOPOIETIC_AND_LYMPHOID_TISSUE	L428	10
NB4_HAEMATOPOIETIC_AND_LYMPHOID_TISSUE	HAEMATOPOIETIC_AND_LYMPHOID_TISSUE	NB4	10
AMO1_HAEMATOPOIETIC_AND_LYMPHOID_TISSUE	HAEMATOPOIETIC_AND_LYMPHOID_TISSUE	AMO1	10
SR786_HAEMATOPOIETIC_AND_LYMPHOID_TISSUE	HAEMATOPOIETIC_AND_LYMPHOID_TISSUE	SR786	10
SUPHD1_HAEMATOPOIETIC_AND_LYMPHOID_TISSUE	HAEMATOPOIETIC_AND_LYMPHOID_TISSUE	SUPHD1	10
MOLM6_HAEMATOPOIETIC_AND_LYMPHOID_TISSUE	HAEMATOPOIETIC_AND_LYMPHOID_TISSUE	MOLM6	10
LAMA84_HAEMATOPOIETIC_AND_LYMPHOID_TISSUE	HAEMATOPOIETIC_AND_LYMPHOID_TISSUE	LAMA84	10
PL21_HAEMATOPOIETIC_AND_LYMPHOID_TISSUE	HAEMATOPOIETIC_AND_LYMPHOID_TISSUE	PL21	10
L540_HAEMATOPOIETIC_AND_LYMPHOID_TISSUE	HAEMATOPOIETIC_AND_LYMPHOID_TISSUE	L540	10
HDLM2_HAEMATOPOIETIC_AND_LYMPHOID_TISSUE	HAEMATOPOIETIC_AND_LYMPHOID_TISSUE	HDLM2	10
SUPM2_HAEMATOPOIETIC_AND_LYMPHOID_TISSUE	HAEMATOPOIETIC_AND_LYMPHOID_TISSUE	SUPM2	10
KARPAS299_HAEMATOPOIETIC_AND_LYMPHOID_TISSUE	HAEMATOPOIETIC_AND_LYMPHOID_TISSUE	KARPAS299	10
KMS20_HAEMATOPOIETIC_AND_LYMPHOID_TISSUE	HAEMATOPOIETIC_AND_LYMPHOID_TISSUE	KMS20	10
PCM6_HAEMATOPOIETIC_AND_LYMPHOID_TISSUE	HAEMATOPOIETIC_AND_LYMPHOID_TISSUE	PCM6	10
TUHR10TKB_KIDNEY	KIDNEY	TUHR10TKB	10
HT29_LARGE_INTESTINE	LARGE_INTESTINE	HT29	10
T84_LARGE_INTESTINE	LARGE_INTESTINE	T84	10
NCIH747_LARGE_INTESTINE	LARGE_INTESTINE	NCIH747	10
LS123_LARGE_INTESTINE	LARGE_INTESTINE	LS123	10
SNU1197_LARGE_INTESTINE	LARGE_INTESTINE	SNU1197	10
SNU61_LARGE_INTESTINE	LARGE_INTESTINE	SNU61	10
NCIH441_LUNG	LUNG	NCIH441	10
NCIH1975_LUNG	LUNG	NCIH1975	10
NCIH2228_LUNG	LUNG	NCIH2228	10
SKMES1_LUNG	LUNG	SKMES1	10
HCC15_LUNG	LUNG	HCC15	10
SKLU1_LUNG	LUNG	SKLU1	10
SW900_LUNG	LUNG	SW900	10
NCIH2444_LUNG	LUNG	NCIH2444	10
NCIH647_LUNG	LUNG	NCIH647	10
HCC78_LUNG	LUNG	HCC78	10
[truncated: 59 more rows]
